# Supplementary material for: CXCL12 and MYC control energy metabolism to support adaptive responses after kidney injury
Source: Nat Commun. 2018 Sep 10;9:3660. doi: 10.1038/s41467-018-06094-4 (PMC6131511; doi:10.1038/s41467-018-06094-4)
Supplement: Supplementary file 4 — Supplementary Data 1 [file 41467_2018_6094_MOESM4_ESM.xlsx]

## Sheet: Up
Supplementary Data 1. Up-regulated gene ontology (GO) enrichment terms, comparing Cxcl12 KO and control mice.	p.geomean	stat.mean	p.val	q.val	set.size	17205.ReadsPerGene.out	17207.ReadsPerGene.out	17209.ReadsPerGene.out	17215.ReadsPerGene.out	17217.ReadsPerGene.out	Genes
mRNA processing	8.8223e-11	0.196279	2.94922e-45	1.04343e-41	300	2.63633e-13	3.1442e-09	4.17072e-11	3.22714e-12	2.00516e-07	Aff2(0.65), Rbm38(0.42), Celf4(0.39), Cpeb1(0.34), Clp1(0.3), Rnasel(0.28), Alyref2(0.27), Kin(0.26), Rbm15b(0.26), Snrpa1(0.25), Noct(0.24), Snrpd1(0.24), Lsm2(0.24), Cir1(0.24), Ptbp3(0.24), Usb1(0.22), Rnps1(0.21), Clasrp(0.21), Snrnp25(0.21), Rnmt(0.2), Pan2(0.2), Gemin8(0.19), Pabpc1(0.18), Rbbp6(0.18), Srsf5(0.18), Cactin(0.18), Lsm11(0.18), Snrnp35(0.18), Lsm8(0.18), Rbm27(0.18), Gcfc2(0.1…
RNA splicing	1.17371e-09	0.211199	1.08712e-39	1.92311e-36	228	1.13891e-11	9.03464e-10	3.70761e-10	1.01539e-10	1.69466e-05	Aff2(0.65), Rbm38(0.42), Celf4(0.39), Alyref2(0.27), Rbm15b(0.26), Snrpa1(0.25), Snrpd1(0.24), Lsm2(0.24), Cir1(0.24), Ptbp3(0.24), Usb1(0.22), Rnps1(0.21), Clasrp(0.21), Snrnp25(0.21), Gemin8(0.19), Pabpc1(0.18), Srsf5(0.18), Cactin(0.18), Snrnp35(0.18), Lsm8(0.18), Gcfc2(0.18), Srsf3(0.17), Smn1(0.17), Zpr1(0.17), Tfip11(0.17), Ppie(0.17), Tra2a(0.17), Jmjd6(0.17), Mbnl3(0.17), Casc3(0.17), Mag…
inflammatory response	3.61245e-11	0.215937	3.87022e-39	4.56427e-36	240	1.76925e-06	1.57085e-25	2.90077e-05	1.15626e-15	0.014306	Cxcl3(2.56), Cxcl3(2.56), Ccr7(2.19), Ccr7(2.19), Cxcl2(1.86), Chil3(1.73), S100a9(1.61), S100a8(1.6), Fpr2(1.55), Fpr1(1.5), Cxcl5(1.43), Cxcl5(1.43), Tac1(1.42), Cd14(1.38), Gal(1.34), Acod1(1.34), Mefv(1.34), Il1f9(1.34), Chil1(1.27), Ltb4r1(1.25), Ptgs2(1.16), Il6(1.08), Il1f6(0.97), Ccl20(0.91), Kng1(0.89), Calca(0.84), Alox5(0.77), Tlr6(0.77), Il1b(0.74), Relt(0.74), Ccl22(0.73), Ccl6(0.68)…
cell-cell adherens junction	1.26941e-08	0.1719	1.60752e-34	1.24531e-31	304	8.56088e-11	7.23072e-07	3.41523e-08	4.05134e-11	1.4839e-05	Hspa1a(1.78), Dnajb1(0.58), Tes(0.52), Pvr(0.5), Gprc5a(0.5), Efhd2(0.48), Epha2(0.43), Bag3(0.41), Clic1(0.41), Hsp90ab1(0.4), Ppp1r13l(0.38), Rtn4(0.35), Cast(0.33), Fmnl2(0.31), Hspa5(0.3), Rpl24(0.28), Rab10(0.27), Dbn1(0.27), Zc3hav1(0.27), Cdh1(0.26), Cdh1(0.26), Sfn(0.26), Twf2(0.25), Egfr(0.23), Emd(0.23), Ezr(0.23), Fam129b(0.23), Itgb1(0.22), Rab11b(0.22), Src(0.22), Baiap2l1(0.22), Ppf…
cadherin binding involved in cell-cell adhesion	1.38461e-08	0.184402	1.75991e-34	1.24531e-31	263	2.40897e-10	8.70628e-07	3.45939e-08	5.45491e-11	5.31197e-06	Hspa1a(1.78), Dnajb1(0.58), Tes(0.52), Gprc5a(0.5), Efhd2(0.48), Epha2(0.43), Bag3(0.41), Clic1(0.41), Hsp90ab1(0.4), Ppp1r13l(0.38), Rtn4(0.35), Cast(0.33), Fmnl2(0.31), Hspa5(0.3), Rpl24(0.28), Rab10(0.27), Dbn1(0.27), Zc3hav1(0.27), Cdh1(0.26), Sfn(0.26), Twf2(0.25), Egfr(0.23), Emd(0.23), Ezr(0.23), Fam129b(0.23), Itgb1(0.22), Rab11b(0.22), Src(0.22), Baiap2l1(0.22), Ppfibp1(0.22), Cnn3(0.22)…
cytosolic large ribosomal subunit	3.93145e-09	0.294723	1.34892e-31	7.95413e-29	95	1.47276e-13	1.53402e-18	0.000465241	1.86648e-05	0.00494878	Rpl36a(0.46), Rpl36a(0.46), Rpl36(0.41), Rpl17(0.33), Rpl19(0.31), Rpl19(0.31), Rpl11(0.3), Rpl11(0.3), Rpl22l1(0.29), Rpl24(0.28), Rpl24(0.28), Rpl5(0.26), Rpl5(0.26), Rpl31(0.24), Rpl31(0.24), Rpl12(0.24), Rpl12(0.24), Rpl10(0.23), Rpl10(0.23), Rpl35(0.21), Rpl35(0.21), Rpl14(0.19), Rpl14(0.19), Rpl34(0.19), Rpl34(0.19), Rpl9(0.18), Rpl9(0.18), Rpl18(0.17), Rpl18(0.17), Rpl3l(0.17), Rpl3l(0.17)…
focal adhesion	5.07778e-08	0.143701	2.78745e-28	1.40886e-25	368	4.15402e-07	1.74529e-13	0.00123518	9.60942e-12	0.00494395	Hspa1a(1.78), Hspb1(0.9), Procr(0.9), Itgb3(0.82), Akap12(0.79), Hmga1(0.59), Kif22(0.53), Tes(0.52), Spry4(0.5), Epha2(0.43), Tnc(0.41), Rhob(0.39), Plaur(0.39), Pdlim7(0.37), Cd9(0.36), Ywhag(0.36), Kif23(0.36), Nectin2(0.35), Sdc4(0.34), Cd44(0.33), Fes(0.33), Itga5(0.33), Rnd3(0.33), Lims2(0.33), Lims2(0.33), Arpc1b(0.32), Hmga1-rs1(0.32), Rpl19(0.31), Hspa5(0.3), Rac1(0.3), Rps29(0.3), Rhog(…
neutrophil chemotaxis	8.40891e-08	0.382322	1.66297e-26	7.35447e-24	48	0.000295958	3.28925e-14	0.00217897	5.52782e-14	0.00676769	Cxcl3(2.56), Cxcl3(2.56), Cxcl2(1.86), S100a9(1.61), S100a8(1.6), Cxcr2(1.44), Trem1(1.27), Csf3r(1.06), Amica1(1.02), Ccl20(0.91), Il1b(0.74), Ccl22(0.73), Ccl6(0.68), Pde4b(0.64), Itgam(0.63), Syk(0.6), Cxcl1(0.59), Spp1(0.53), Spp1(0.53), Fcgr3(0.47), Fcer1g(0.45), Pde4d(0.28), Cxadr(0.26), Vav1(0.2), Itgb2(0.16), Itgb2(0.16), Lgals3(0.14), C5ar1(0.11), Ccl9(0.1), Cklf(0.1), Nckap1l(0.06), Ccl…
intracellular ribonucleoprotein complex	1.22461e-06	0.149836	1.18485e-25	4.65777e-23	304	5.71176e-09	3.74612e-06	5.9387e-05	3.13004e-07	1.08923e-05	Zfp36(0.41), Rpl36(0.41), Ago4(0.37), Rps6kl1(0.37), Cpeb1(0.34), Csnk1e(0.33), Rpl17(0.33), Zfp36l1(0.31), Zfp36l1(0.31), Rpl19(0.31), Rps29(0.3), Rpl11(0.3), Mvp(0.3), Rpl22l1(0.29), Rps6(0.28), Rpl24(0.28), Rpl5(0.26), Snrpa1(0.25), Snrpd1(0.24), Lsm2(0.24), Rpl31(0.24), Rpl12(0.24), Sra1(0.23), Ybx3(0.21), Srp19(0.21), Mrpl33(0.21), Rps17(0.2), Ighmbp2(0.19), Nsa2(0.19), Rpl14(0.19), Mrpl52(0…
cytokine activity	7.92793e-08	0.271757	2.9953e-25	1.05974e-22	114	8.58101e-09	7.20431e-16	0.00599999	1.097e-09	0.170762	Cxcl3(2.56), Cxcl2(1.86), Cxcl5(1.43), Il1f9(1.34), Tnfsf14(1.25), Il6(1.08), Il6(1.08), Inhbb(1.02), Bmp8b(1), Osm(1), Osm(1), Il1f6(0.97), Il11(0.92), Ccl20(0.91), Edn1(0.76), Il1b(0.74), Il1b(0.74), Lif(0.73), Lif(0.73), Ccl22(0.73), Ccl6(0.68), Pglyrp1(0.68), Cxcl1(0.59), Inhba(0.54), Inhba(0.54), Csf3(0.53), Csf3(0.53), Csf3(0.53), Spp1(0.53), Grem2(0.51), Il16(0.5), Il1rn(0.49), Bmp8a(0.44)…
G-protein coupled receptor signaling pathway	1.19584e-07	0.165673	4.59642e-25	1.47838e-22	288	0.00177418	8.10296e-19	0.00358199	1.9362e-09	0.0034793	Cxcl3(2.56), Ccr7(2.19), Cxcl2(1.86), Fpr2(1.55), Fpr1(1.5), Rgs18(1.45), Cxcr2(1.44), Cxcl5(1.43), Ppbp(1.29), Ltb4r1(1.25), Celsr3(1.19), P2ry13(1.08), Sstr4(1.04), P2ry10(1), Apln(0.98), Ccl20(0.91), Edn1(0.76), Edn1(0.76), Ccl22(0.73), Rgs1(0.71), Rgs1(0.71), Ccl6(0.68), Hcar2(0.68), Adora2b(0.67), Syk(0.6), Cxcl1(0.59), Drd1(0.57), Drd1(0.57), S1pr1(0.56), Adrb2(0.54), Gpr132(0.54), Gpr35(0.…
spliceosomal complex	1.73573e-06	0.218051	7.43205e-25	2.19122e-22	139	2.15785e-08	2.06091e-06	3.13319e-06	3.05368e-07	0.000513858	Alyref2(0.27), Snrpa1(0.25), Snrpd1(0.24), Lsm2(0.24), Snrnp25(0.21), Bud31(0.2), Pabpc1(0.18), Cactin(0.18), Snrnp35(0.18), Lsm8(0.18), Tfip11(0.17), Ppie(0.17), Magoh(0.16), Ptbp2(0.16), Sf1(0.15), Snrnp40(0.15), Rbm22(0.15), Rbm25(0.15), Prcc(0.15), Lgals3(0.14), Snrpb2(0.14), Zrsr2(0.14), Gemin2(0.14), Phf5a(0.14), U2af1(0.14), Snrpb(0.13), Snrnp48(0.13), Syf2(0.13), Frg1(0.12), Raly(0.12), R…
rRNA processing	5.70113e-07	0.227217	4.38208e-24	1.1926e-21	125	6.96628e-15	0.00260778	8.79204e-06	3.50167e-06	0.000674519	Isg20(0.32), Rpl11(0.3), Rps6(0.28), Rps6(0.28), Rnasel(0.28), Sbds(0.28), Sbds(0.28), Las1l(0.28), Chd7(0.26), Rpl5(0.26), Rps17(0.2), Rrp1b(0.2), Utp23(0.2), Sirt1(0.2), Nsa2(0.19), Rpl14(0.19), Fcf1(0.19), Dcaf13(0.19), Eri1(0.18), Mphosph10(0.18), Rrp9(0.17), Rps16(0.15), Rps7(0.15), Rps7(0.15), Pop4(0.15), Rrp15(0.15), Gar1(0.15), Ddx21(0.14), Exosc8(0.14), Suv39h1(0.13), Rps28(0.13), Rcl1(0…
catalytic step 2 spliceosome	4.53391e-06	0.238383	1.47091e-22	3.71721e-20	106	1.00073e-08	0.0001338	5.69904e-05	3.04089e-07	0.000164414	Snrpa1(0.25), Snrpd1(0.24), Snrpd1(0.24), Lsm2(0.24), Lsm2(0.24), Pabpc1(0.18), Cactin(0.18), Tfip11(0.17), Ppie(0.17), Magoh(0.16), Magoh(0.16), Rbm8a(0.16), Rbmx2(0.16), Snrnp40(0.15), Snrnp40(0.15), Rbm22(0.15), Snrpb2(0.14), Snrpb2(0.14), Phf5a(0.14), Snrpb(0.13), Snrpb(0.13), Syf2(0.13), Syf2(0.13), Frg1(0.12), Frg1(0.12), Raly(0.12), Bcas2(0.12), Hnrnpc(0.11), Sart1(0.11), Sf3b6(0.11), Dhx8…
cytosolic small ribosomal subunit	2.11498e-06	0.310246	6.94227e-22	1.63745e-19	65	0.000150229	1.25423e-13	0.00277404	5.56152e-05	8.25294e-05	Hba-a1(1.48), Hba-a2(1.37), Rps29(0.3), Rps29(0.3), Rps29(0.3), Rps6(0.28), Rps6(0.28), Rps17(0.2), Rps17(0.2), Rps12(0.16), Rps12(0.16), Rpsa(0.15), Rpsa(0.15), Rps16(0.15), Rps16(0.15), Rps7(0.15), Rps7(0.15), Rps15a(0.15), Rps3a1(0.14), Rps28(0.13), Rps28(0.13), Rps13(0.13), Rps13(0.13), Ddx3x(0.12), Rps14(0.12), Rps14(0.12), Rps9(0.12), Rps9(0.12), Rps2(0.11), Rps2(0.11), Rps5(0.11), Rps5(0.1…
external side of plasma membrane	4.47749e-07	0.179055	9.25142e-21	2.04572e-18	194	0.00706994	2.62164e-18	0.0135803	7.3308e-09	0.0397608	Cd80(2.51), Ccr7(2.19), Fgb(1.88), Pdcd1(1.59), Fgg(1.46), Cd14(1.38), Cd33(1.18), Sell(1.11), Il6(1.08), Fga(1.06), Klrb1b(0.96), Fcgr4(0.92), Itgb3(0.82), Itgam(0.63), S1pr1(0.56), Il7r(0.56), Il31ra(0.54), Il1rl1(0.52), Il1rl1(0.52), Cd274(0.52), Cxcr4(0.48), Fcgr3(0.47), Sema7a(0.47), Cdh5(0.45), Fcer1g(0.45), Cd55(0.44), Siglece(0.44), Cd83(0.43), Ctsl(0.43), Cd48(0.41), Ccr1(0.4), Hfe(0.39)…
chemokine activity	6.38995e-06	0.379909	2.01317e-19	4.18977e-17	44	0.000488195	6.77268e-10	0.0104261	1.65234e-09	0.00825011	Cxcl3(2.56), Cxcl3(2.56), Cxcl2(1.86), Cxcl2(1.86), Cxcl5(1.43), Cxcl5(1.43), Ppbp(1.29), Ccl20(0.91), Ccl20(0.91), Ccl22(0.73), Ccl6(0.68), Ccl6(0.68), Cxcl1(0.59), Cxcl1(0.59), Pf4(0.34), Ccl9(0.1), Cklf(0.1), Cxcl14(0.07), Ccl25(0.04), Ccl25(0.04), Ccl21a(0.03), Ccl21a(0.03), Ccl21a(0.03), Ccl5(0.03), Ccl5(0.03), Cxcl16(0.01), Cxcl16(0.01), Cxcl10(-0.05), Cxcl10(-0.05), Ccl2(-0.17), Ccl2(-0.17…
transcription coactivator activity	1.49477e-05	0.164343	4.13622e-19	8.12997e-17	195	0.000571776	0.00130995	1.1379e-10	0.000113585	0.000221256	Junb(0.48), Jun(0.46), Jun(0.46), Lpin3(0.4), Cited4(0.38), Cited4(0.38), Jund(0.34), Bcl10(0.32), Tgfb1i1(0.28), Taf5l(0.28), Cited2(0.27), Cited2(0.27), Lpin2(0.25), Gmeb2(0.25), Elf3(0.23), Sra1(0.23), Cbfb(0.22), Gmeb1(0.21), Pdlim1(0.2), Yap1(0.19), Yap1(0.19), Arid5b(0.19), Atxn7l3(0.19), Daxx(0.18), Tfap2a(0.18), Tfap2a(0.18), Prmt2(0.17), Sp4(0.17), Kat5(0.17), Kat5(0.17), Wwtr1(0.17), Ww…
proteasome complex	2.47654e-05	0.286522	8.6685e-19	1.61417e-16	66	4.02039e-06	0.000256171	4.3126e-08	0.00313578	0.000163568	Hspb1(0.9), Psma5(0.34), Zfand2a(0.33), Adrm1(0.25), Psmd11(0.25), Txnl1(0.19), Psma1(0.18), Psma1(0.18), Psmd8(0.17), Vcp(0.17), Psma7(0.16), Psmd10(0.15), Psme2(0.14), Usp14(0.14), Psmd14(0.14), Psmd14(0.14), Psmd14(0.14), Psmg3(0.14), Psmd7(0.13), Psmd3(0.13), Psmd4(0.12), Psma6(0.12), Psmb3(0.12), Psmd1(0.12), Psmd1(0.12), Psma2(0.11), Psmb4(0.11), Psmb7(0.11), Shfm1(0.11), Shfm1(0.11), Psmd2…
immune response	3.12971e-06	0.230367	1.64875e-18	2.91664e-16	131	7.29183e-05	1.6874e-13	0.0158763	1.88754e-08	0.232612	Cxcl3(2.56), Ccr7(2.19), Cxcl2(1.86), Cxcl5(1.43), Ppbp(1.29), Tnfsf14(1.25), Il6(1.08), Clec4e(1.01), Osm(1), Il1f6(0.97), Ccl20(0.91), Slpi(0.8), Tlr6(0.77), Il1b(0.74), Oas3(0.74), Relt(0.74), Lif(0.73), Ccl22(0.73), Ccl6(0.68), Cxcl1(0.59), Csf3(0.53), Cd274(0.52), Tnfrsf26(0.48), Prg4(0.46), Ccr1(0.4), Nfil3(0.4), Smad3(0.35), Ltb(0.34), Pf4(0.34), Pf4(0.34), Cebpg(0.32), Cblb(0.29), Ctss(0.…
chromatin modification	2.49573e-05	0.149908	2.84827e-18	4.79865e-16	249	3.14661e-05	0.00497556	1.98039e-07	2.94885e-06	0.000855434	Phf13(0.41), Chd5(0.32), Brd2(0.3), Sgf29(0.3), Phf1(0.28), Kdm1a(0.27), Jmjd1c(0.27), Meaf6(0.26), Chd7(0.26), Morf4l2(0.25), Kansl2(0.25), Bcorl1(0.24), Kat6b(0.22), Brd4(0.21), Yeats4(0.21), Ikzf1(0.19), Atxn7l3(0.19), Emsy(0.19), Chd2(0.19), Daxx(0.18), Ezh2(0.18), Hira(0.18), Eya3(0.17), Ing2(0.17), Kat5(0.17), Jmjd6(0.17), Kdm6b(0.17), Jak2(0.16), Ruvbl2(0.16), Tspyl2(0.16), Ing5(0.16), Msl…
ubiquitin protein ligase binding	2.67918e-05	0.134114	4.99355e-18	8.03054e-16	277	3.35108e-06	0.00106303	5.32718e-07	0.0018289	6.89576e-05	Hspa1a(1.78), Dio2(0.93), Ptpn22(0.83), Ube2t(0.74), Ube2t(0.74), Usp13(0.71), Clu(0.67), Uchl1(0.55), Trib1(0.55), Cdkn1a(0.54), Hspa1l(0.53), Asb4(0.49), Cxcr4(0.48), Nfkbia(0.48), Rad18(0.47), Syt11(0.38), Txnip(0.37), Rela(0.36), Smad3(0.35), Nkd2(0.35), Bcl10(0.32), Hspa5(0.3), Ggn(0.29), Hspd1(0.28), Ube2g2(0.28), Per1(0.27), Tgfbr1(0.27), Abtb1(0.26), Traf3(0.25), Hif1a(0.24), Egfr(0.23), …
cell surface	3.92782e-06	0.119578	5.90649e-18	9.08572e-16	494	0.0512849	9.20226e-16	0.0326557	9.36595e-07	0.00166744	Cd80(2.51), Ccr7(2.19), Ccr7(2.19), Fgb(1.88), Fgg(1.46), Cxcr2(1.44), Cd14(1.38), Treml2(1.22), Sell(1.11), Sell(1.11), Mmp7(1.09), Islr2(1.08), Fga(1.06), Defb19(1.06), Fcgr4(0.92), Procr(0.9), Thbd(0.9), Itgb3(0.82), Itgb3(0.82), Dcstamp(0.79), Dcstamp(0.79), Apoh(0.77), Hilpda(0.74), Adora2b(0.67), Clu(0.67), Tpbg(0.67), Hsp90aa1(0.65), Itgam(0.63), Itgam(0.63), Trpv2(0.62), Nfam1(0.61), Krt4…
ubiquitin protein ligase activity	4.85154e-05	0.150772	3.73402e-17	5.50456e-15	212	0.00363714	0.0104684	2.89126e-08	9.21771e-05	3.57225e-06	Ube2t(0.74), Rnf125(0.67), Traip(0.51), Asb4(0.49), Trim72(0.48), Rad18(0.47), Rnf180(0.43), Znrf1(0.35), Znrf1(0.35), Rnf19b(0.34), Rnf144b(0.34), Smurf1(0.29), Cblb(0.29), Ube2g2(0.28), Rabgef1(0.28), Peli3(0.27), Arih2(0.24), Fbxo30(0.23), Ube2o(0.23), Ube2o(0.23), Rnf4(0.21), Rnf4(0.21), Ube2j2(0.21), Bfar(0.2), Bfar(0.2), Siah2(0.19), Med11(0.19), Neurl3(0.19), Rnf217(0.19), Rbbp6(0.18), Ube…
ribosome biogenesis	2.99872e-05	0.245691	7.12842e-17	1.00881e-14	81	5.37466e-10	0.00525408	0.00284866	7.39936e-06	0.00323671	Setd4(0.52), Sbds(0.28), Gnl2(0.26), Ddx28(0.23), Utp23(0.2), Ddx31(0.2), Nsa2(0.19), Rpl34(0.19), Fcf1(0.19), Dcaf13(0.19), Mphosph10(0.18), Sdad1(0.17), Eif6(0.16), Nop58(0.16), Rrs1(0.16), Nip7(0.16), Gtpbp4(0.16), Rplp0(0.15), Gar1(0.15), Rps28(0.13), Rcl1(0.13), Nop10(0.13), Ddx3x(0.12), Frg1(0.12), Nhp2(0.12), Brix1(0.12), Utp14a(0.12), Nop14(0.11), Noc4l(0.11), Imp3(0.11), Ddx27(0.11), Znh…
immune system process	8.38952e-06	0.144817	1.04445e-16	1.42125e-14	294	0.00582444	4.06412e-14	0.00851271	1.03111e-06	0.105787	Fgb(1.88), S100a9(1.61), S100a8(1.6), Pdcd1(1.59), Fgg(1.46), Cd14(1.38), Acod1(1.34), Mefv(1.34), Il1f9(1.34), Cd300lf(1.14), Fga(1.06), Clec4d(1.03), Amica1(1.02), Clec4e(1.01), Pirb(0.98), Il1f6(0.97), Lcn2(0.84), Ptpn22(0.83), Slpi(0.8), Dcstamp(0.79), Tlr6(0.77), Oas3(0.74), Pglyrp1(0.68), Rnf125(0.67), Tnfaip8l2(0.62), Lilrb4a(0.6), Syk(0.6), Eomes(0.57), Fgr(0.54), Il31ra(0.54), Tlr13(0.54…
mRNA binding	9.15189e-05	0.191422	1.44294e-16	1.89079e-14	124	8.5077e-05	0.00103246	3.48266e-06	0.000164956	0.00038853	Piwil2(1.27), Hsp90aa1(0.65), Rbm38(0.42), Zfp36(0.41), Zfp36(0.41), Celf4(0.39), Cpeb1(0.34), Zfp36l1(0.31), Zfp36l1(0.31), Rps6(0.28), Rpl5(0.26), Noct(0.24), Paip2(0.24), Igf2bp2(0.23), Rpl35(0.21), Zc3h12a(0.21), Fxr2(0.2), Pabpc1(0.18), Samd4(0.18), Snrnp35(0.18), Mbd2(0.16), Ptbp2(0.16), Rbm8a(0.16), Dcp1a(0.16), Qk(0.15), Ybx1(0.15), Rbm25(0.15), Rps3a1(0.14), Rps13(0.13), Upf3b(0.13), Rc3…
response to lipopolysaccharide	4.8401e-05	0.191302	2.06212e-16	2.60564e-14	124	0.00228394	9.24031e-10	0.000532181	1.33543e-05	0.030697	Cxcl3(2.56), Ccr7(2.19), Cxcl2(1.86), Cxcl5(1.43), Acod1(1.34), Ppbp(1.29), Ptgs2(1.16), Wfdc21(0.95), Ptpn22(0.83), Slpi(0.8), Il1b(0.74), Il1b(0.74), Relt(0.74), Cyp27b1(0.73), Irak3(0.72), Cxcl1(0.59), Trib1(0.55), Trib1(0.55), Cebpb(0.52), Junb(0.48), Nfkbia(0.48), Tnfrsf26(0.48), Jun(0.46), Ncf2(0.44), Dusp10(0.36), Jund(0.34), Pf4(0.34), Litaf(0.32), Tirap(0.3), Kcnj8(0.29), Mapkapk2(0.29),…
translation	7.36589e-05	0.138194	3.49773e-16	4.26723e-14	289	1.39168e-05	0.00493138	0.00304619	3.15083e-05	2.93094e-06	Slc25a22(0.53), Rpl36(0.41), Eif1(0.38), Rpl17(0.33), Rpl19(0.31), Rpl19(0.31), Rps29(0.3), Rpl11(0.3), Slc25a29(0.3), Rpl22l1(0.29), Rpl24(0.28), Rpl24(0.28), Eif4a1(0.26), Aarsd1(0.26), Abtb1(0.26), Rpl5(0.26), Rpl31(0.24), Rpl12(0.24), Egfr(0.23), Rpl10(0.23), Rpl10(0.23), Rpl35(0.21), Mrpl33(0.21), Rbm3(0.2), Rps17(0.2), Ighmbp2(0.19), Ucp3(0.19), Rpl14(0.19), Rpl34(0.19), Rpl9(0.18), Denr(0.…
proteasome-mediated ubiquitin-dependent protein catabolic process	5.74351e-05	0.178644	4.11683e-16	4.85512e-14	145	9.60611e-05	0.0281161	1.14894e-08	2.92527e-05	0.00291865	Trim72(0.48), Kctd5(0.41), Znrf1(0.35), Smurf1(0.29), Ppp2cb(0.26), Abtb1(0.26), Arntl(0.23), Kctd13(0.23), Rmnd5b(0.22), Abtb2(0.22), Rnf4(0.21), Rnf4(0.21), Arrb2(0.21), Tnfaip1(0.2), Bfar(0.2), Bfar(0.2), Sirt1(0.2), Siah2(0.19), Btbd9(0.19), Nsfl1c(0.19), Ube2i(0.18), Rffl(0.18), Siah1a(0.17), Psmd8(0.17), Kat5(0.17), Atxn3(0.17), Vcp(0.17), Fbxl3(0.16), Ube2d3(0.16), Ube2d3(0.16), Rnf145(0.1…
chromatin binding	8.83715e-05	0.106589	4.95174e-16	5.65138e-14	413	5.26139e-05	0.00288927	2.56892e-06	9.0133e-06	0.00683433	Ankrd2(1), Fos(0.81), Ube2t(0.74), Hmga1(0.59), Eomes(0.57), Mbd1(0.57), Nr5a2(0.57), Arid5a(0.53), Cebpb(0.52), Tgif1(0.49), Relb(0.48), Fosl2(0.46), Jun(0.46), Sox9(0.41), Phf13(0.41), Phf13(0.41), Nupr1(0.39), Rela(0.36), Rela(0.36), Smad3(0.35), Elk4(0.33), Chd5(0.32), Brd2(0.3), Phf1(0.28), Zfp354b(0.28), Cited2(0.27), Nfkb2(0.27), Kdm1a(0.27), Tle1(0.25), Nfkb1(0.24), Egfr(0.23), Gata6(0.23…
positive regulation of neutrophil chemotaxis	8.95568e-05	0.422858	1.51401e-15	1.62621e-13	24	0.0173323	2.44123e-07	0.000809446	2.08522e-07	0.011145	Cxcl3(2.56), Ccr7(2.19), Ccr7(2.19), Cxcl2(1.86), Cxcr2(1.44), Sell(1.11), Edn1(0.76), Il1b(0.74), Thbs4(0.74), Cxcl1(0.59), Rac1(0.3), Rac1(0.3), Tirap(0.3), Rac2(0.23), Rac2(0.23), C5ar1(0.11), Nckap1l(0.06), Ednra(0.02), Cd74(-0.05), C1qbp(-0.13), Lbp(-0.24), C3ar1(-0.36), Dapk2(-0.37), Camk1d(-0.42),
growth factor activity	4.04294e-05	0.215287	1.51682e-15	1.62621e-13	107	0.000522346	1.07787e-11	0.00229548	0.000131555	0.118077	Pgf(1.53), Pgf(1.53), Il6(1.08), Inhbb(1.02), Bmp8b(1), Osm(1), Il11(0.92), Il11(0.92), Il11(0.92), Thbs4(0.74), Lif(0.73), Lif(0.73), Gdnf(0.72), Ereg(0.71), Ereg(0.71), Ntf5(0.63), Cxcl1(0.59), Ctgf(0.55), Inhba(0.54), Csf3(0.53), Csf3(0.53), Bmp8a(0.44), Fgf21(0.43), Il34(0.42), Hbegf(0.36), Hbegf(0.36), Nrg4(0.32), Pdgfa(0.31), Gmfg(0.27), Tgfb1(0.26), Gdf15(0.26), Ngf(0.25), Pdgfb(0.25), Rab…
ubiquitin conjugating enzyme activity	0.000182695	0.315625	3.26819e-15	3.40084e-13	42	0.00332942	8.25663e-06	7.61187e-06	0.00183836	0.00074915	Ube2t(0.74), Ube2g2(0.28), Ube2g2(0.28), Ube2e2(0.28), Ube2d1(0.26), Ube2d1(0.26), Ube2ql1(0.24), Ube2q2(0.23), Ube2o(0.23), Ube2j2(0.21), Ube2v1(0.18), Ube2v1(0.18), Ube2z(0.18), Ube2j1(0.16), Ube2j1(0.16), Ube2d3(0.16), Cdc34(0.16), Cdc34(0.16), Ube2e1(0.15), Ube2e1(0.15), Ube2e1(0.15), Ube2b(0.13), Ube2s(0.11), Ube2g1(0.1), Ube2r2(0.1), Ube2l3(0.08), Ube2l3(0.08), Ube2a(0.07), Ube2a(0.07), Ube…
ubiquitin-dependent protein catabolic process	0.000141747	0.17996	3.83423e-15	3.87586e-13	143	0.000717759	0.0373303	1.10189e-06	0.000266356	1.25809e-05	Usp13(0.71), Uchl1(0.55), Uchl3(0.39), Psma5(0.34), Fbxo32(0.31), Usp43(0.27), Ube2d1(0.26), Psmd11(0.25), Psmd11(0.25), Arih2(0.24), Sqstm1(0.23), Usp27x(0.22), Fbxl2(0.21), Siah2(0.19), Xbp1(0.19), Psma1(0.18), Rffl(0.18), Usp36(0.18), Nploc4(0.18), Siah1a(0.17), Rnf11(0.17), Atxn3(0.17), Vcp(0.17), Psma7(0.16), Ube2d3(0.16), Usp42(0.16), Cacul1(0.16), Usp28(0.15), Usp14(0.14), Ubr2(0.14), Psmd…
mRNA splicing, via spliceosome	0.000209598	0.198216	5.55685e-15	5.46115e-13	107	1.69539e-05	0.000169822	0.000688017	4.50577e-05	0.00751752	Rbm15b(0.26), Snrpa1(0.25), Lsm2(0.24), Rbm15(0.22), Bud31(0.2), Snrnp35(0.18), Lsm8(0.18), Tra2a(0.17), Rbpms(0.16), Rbmx2(0.16), Rbm41(0.16), Sf1(0.15), Snrpb2(0.14), Zrsr2(0.14), Zrsr2(0.14), Phf5a(0.14), Phf5a(0.14), U2af1(0.14), Snrpb(0.13), Syf2(0.13), Nhp2l1(0.12), Bcas2(0.12), Prpf3(0.12), Hnrnpc(0.11), Sart1(0.11), Sf3b6(0.11), Dhx8(0.11), Ythdc1(0.11), Tra2b(0.1), Snrpe(0.1), Rnpc3(0.1)…
G-protein coupled receptor activity	3.73051e-05	0.19916	1.17446e-14	1.12304e-12	160	0.0481606	1.85696e-13	0.0167401	0.000120868	0.00976286	Ccr7(2.19), Fpr2(1.55), Fpr1(1.5), Cxcr2(1.44), Ltb4r1(1.25), Celsr3(1.19), P2ry13(1.08), Sstr4(1.04), P2ry10(1), P2ry10(1), Hcar2(0.68), Adora2b(0.67), Drd1(0.57), Drd1(0.57), S1pr1(0.56), Adrb2(0.54), Gpr132(0.54), Gpr35(0.53), Bdkrb2(0.5), Ackr2(0.5), Gprc5a(0.5), Cxcr4(0.48), Adgrg2(0.48), S1pr4(0.44), Gprc5b(0.44), Adgrv1(0.44), Ccr1(0.4), Gpr65(0.4), Sfrp2(0.38), Gpr176(0.36), Opn3(0.34), M…
cell-cell adhesion	0.00019743	0.155521	1.21798e-14	1.13401e-12	173	9.25534e-06	0.000745937	0.00128815	1.22969e-05	0.00915198	Hspa1a(1.78), Dnajb1(0.58), Tes(0.52), Gprc5a(0.5), Efhd2(0.48), Bag3(0.41), Ppp1r13l(0.38), Fmnl2(0.31), Rab10(0.27), Zc3hav1(0.27), Sfn(0.26), Twf2(0.25), Elmo2(0.25), Emd(0.23), Fam129b(0.23), Ppfibp1(0.22), Cnn3(0.22), Ehd4(0.22), Krt18(0.21), Lrrc59(0.21), Pdlim1(0.2), Esyt2(0.19), Rpl14(0.19), Fscn1(0.18), Vasp(0.17), Ywhaz(0.17), Pkp3(0.17), Unc45a(0.17), Flnb(0.17), Ppl(0.16), Cdc42ep1(0.…
ribosome	0.000215348	0.181385	1.87166e-14	1.69793e-12	157	8.6704e-05	0.000122185	0.00366675	0.00065	0.000155541	Rpl36(0.41), Rps6kl1(0.37), Rpl17(0.33), Rpl19(0.31), Rps29(0.3), Rpl11(0.3), Rpl22l1(0.29), Rps6(0.28), Rpl24(0.28), Rpl5(0.26), Rpl31(0.24), Rpl12(0.24), Mrpl33(0.21), Rps17(0.2), Rpl14(0.19), Mrpl52(0.19), Rpl9(0.18), Rpl18(0.17), Rpl39(0.17), Rplp2(0.16), Rpl13(0.16), Rplp0(0.15), Rpsa(0.15), Rpl37a(0.15), Rps16(0.15), Rps7(0.15), Rps3a1(0.14), Rps28(0.13), Mrps30(0.13), Tma16(0.13), Rps13(0.…
translation initiation factor activity	0.00028708	0.25099	2.48376e-14	2.19689e-12	64	2.21408e-05	0.00541699	0.000123049	0.0001769	0.00147346	Eif1(0.38), Eif4a1(0.26), Denr(0.18), Eif4e2(0.17), Eif1a(0.16), Eif6(0.16), Eif3d(0.16), Eif3d(0.16), Eif2b2(0.16), Eif4e(0.14), Eif4e(0.14), Eif5b(0.13), Eif2s2(0.12), Eif5(0.12), Eif3g(0.11), Eif3g(0.11), Eif3j1(0.11), Eif1b(0.1), Eif2b3(0.1), Eif2s1(0.09), Eif2s1(0.09), Eif3f(0.09), Eif3f(0.09), Eif3h(0.09), Eif3h(0.09), Eif4a2(0.08), Eif3b(0.08), Eif3b(0.08), Eif3e(0.07), Eif3e(0.07), Eif1ad…
autophagosome assembly	0.000177273	0.291918	2.76942e-14	2.3898e-12	54	0.00259836	0.0280561	6.55521e-07	0.000493695	3.51791e-05	Trp53inp1(0.66), Wipi1(0.33), Ctsd(0.32), Map1lc3a(0.22), Map1lc3a(0.22), Atg16l2(0.22), Atg2a(0.21), Wipi2(0.2), Wipi2(0.2), Atg101(0.19), Atg101(0.19), Psen1(0.18), Atg4b(0.17), Atg4b(0.17), Atg12(0.17), Atg13(0.16), Atg13(0.16), Wdr45b(0.16), Map1lc3b(0.16), Gabarapl1(0.14), Wdr45(0.13), Stx12(0.13), Atg14(0.13), Atg14(0.13), Atg4a(0.12), Ulk1(0.1), Atg16l1(0.1), Atg5(0.07), Gabarap(0.07), Atg…
thiol-dependent ubiquitin-specific protease activity	0.000277497	0.214399	3.36382e-14	2.83362e-12	87	0.00016009	0.0285836	2.94633e-06	0.000525353	0.000282571	Usp13(0.71), Uchl1(0.55), Uchl3(0.39), Otud1(0.26), Usp31(0.23), Yod1(0.22), Zc3h12a(0.21), Usp36(0.18), Tank(0.17), Atxn3(0.17), Usp42(0.16), Usp42(0.16), Mysm1(0.16), Tnfaip3(0.15), Tnfaip3(0.15), Josd2(0.15), Josd2(0.15), Usp28(0.15), Otud5(0.14), Tnip1(0.14), Usp14(0.14), Josd1(0.14), Otud7b(0.14), Otud7b(0.14), Zranb1(0.14), Zranb1(0.14), Otulin(0.14), Otulin(0.14), Otud3(0.13), Usp22(0.1), …
innate immune response	3.26404e-05	0.133143	4.25661e-14	3.5023e-12	271	0.00333338	1.09233e-10	0.0124734	4.13405e-06	0.177566	Fgb(1.88), S100a9(1.61), S100a8(1.6), Fgg(1.46), Cd14(1.38), Acod1(1.34), Mefv(1.34), Il1f9(1.34), Fga(1.06), Defb19(1.06), Clec4d(1.03), Clec4e(1.01), Il1f6(0.97), Lcn2(0.84), Slpi(0.8), Tlr6(0.77), Oas3(0.74), Pglyrp1(0.68), Tnfaip8l2(0.62), Syk(0.6), Trim15(0.57), Fgr(0.54), Tlr13(0.54), Txk(0.51), Relb(0.48), Mb21d1(0.47), Fcer1g(0.45), Cd55(0.44), Il34(0.42), Jchain(0.38), Ptx3(0.38), Rela(0…
chemotaxis	2.2061e-05	0.244313	4.72229e-14	3.79715e-12	87	0.00997014	4.06954e-12	0.0942561	1.26356e-08	0.27249	Cxcl3(2.56), Ccr7(2.19), Cxcl2(1.86), S100a9(1.61), S100a8(1.6), Fpr2(1.55), Fpr1(1.5), Cxcr2(1.44), Cxcr2(1.44), Cxcl5(1.43), Ccl20(0.91), Ccl20(0.91), Ccl22(0.73), Cxcl17(0.72), Ccl6(0.68), S1pr1(0.56), Il16(0.5), Ackr2(0.5), Cxcr4(0.48), Ccr1(0.4), Cyr61(0.4), Pf4(0.34), Fes(0.33), Rac1(0.3), Robo3(0.26), Rac2(0.23), Pik3cd(0.2), Flt1(0.19), C5ar2(0.16), Cmtm8(0.14), Cmtm3(0.13), Ccr2(0.12), C…
structural constituent of ribosome	0.000171838	0.156108	1.01607e-13	7.98853e-12	215	0.000906435	0.000194881	0.00137141	0.0108864	3.87562e-06	Slc25a22(0.53), Rpl36(0.41), Rpl17(0.33), Rpl19(0.31), Rps29(0.3), Rps29(0.3), Rps29(0.3), Rpl11(0.3), Slc25a29(0.3), Rpl22l1(0.29), Rps6(0.28), Rpl24(0.28), Rpl24(0.28), Rpl5(0.26), Rpl31(0.24), Rpl12(0.24), Rpl10(0.23), Rpl10(0.23), Rpl35(0.21), Mrpl33(0.21), Rps17(0.2), Ucp3(0.19), Rpl14(0.19), Rpl34(0.19), Rpl9(0.18), Rpl9(0.18), Rpl18(0.17), Rpl3l(0.17), Rpl39(0.17), Rpl37(0.17), Rps12(0.16)…
ER to Golgi vesicle-mediated transport	0.000426436	0.224311	3.13387e-13	2.40218e-11	79	0.00250206	0.00226236	0.00363928	7.76352e-05	3.51425e-05	Sec22b(0.31), Ier3ip1(0.29), Trappc4(0.24), Nrbp1(0.21), Nrbp1(0.21), Whamm(0.21), Whamm(0.21), Rab35(0.18), Vcp(0.17), Spast(0.16), Nrbp2(0.16), Hyou1(0.13), Tbc1d20(0.13), Tbc1d20(0.13), Stx5a(0.11), Stx5a(0.11), Ykt6(0.11), Ykt6(0.11), Sec22c(0.11), Vti1b(0.09), Gosr2(0.09), Vapa(0.08), Bcap31(0.07), Bcap31(0.07), Uso1(0.07), Uso1(0.07), Cul3(0.06), Ddhd2(0.06), Sec22a(0.06), Sec22a(0.06), Cog…
nuclear speck	0.00042095	0.183217	3.19114e-13	2.40218e-11	112	0.000652986	0.000467365	1.29207e-05	0.000292291	0.0279508	Zcchc12(1.11), Aff2(0.65), Mbd1(0.57), Ifi204(0.34), Ccnl1(0.33), 1810011O10Rik(0.31), Zcchc18(0.28), Ell(0.24), Hif1a(0.24), Cir1(0.24), Rbm15(0.22), Zbtb16(0.21), Zbtb16(0.21), Rp9(0.2), Poldip3(0.19), Hipk1(0.18), Srsf5(0.18), Srsf3(0.17), Srsf3(0.17), Tfip11(0.17), Pip5k1a(0.16), Malat1(0.16), Malat1(0.16), Cxxc1(0.15), Phf5a(0.14), Tut1(0.14), U2af1(0.14), Rbm11(0.14), Wtap(0.13), Nsrp1(0.12…
chaperonin-containing T-complex	0.000566277	0.493065	4.68613e-13	3.45407e-11	15	3.05486e-05	0.00240202	0.0104976	0.000575779	0.000173693	Tcp1(0.17), Tcp1(0.17), Cct5(0.14), Cct5(0.14), Cct7(0.14), Cct7(0.14), Cct2(0.09), Cct2(0.09), Cct3(0.07), Cct3(0.07), Cct4(0.07), Cct4(0.07), Cct8(0.06), Cct8(0.06), Cct6b(-0.88),
protein ubiquitination	0.000353527	0.131883	5.69752e-13	4.11384e-11	231	0.0254527	0.0158874	6.74972e-08	0.00188768	0.000138307	Traip(0.51), Trim72(0.48), Ccnf(0.45), Klhl21(0.39), Rnf19b(0.34), Rnf144b(0.34), Enc1(0.31), Fbxo32(0.31), Fbxo32(0.31), Smurf1(0.29), Smurf1(0.29), Klhl8(0.29), Traf3(0.25), Arih2(0.24), Ube2ql1(0.24), Fbxo30(0.23), Kctd13(0.23), Gan(0.22), Rnf4(0.21), Rnf4(0.21), Fbxl2(0.21), Arrb2(0.21), Tnfaip1(0.2), Rnf103(0.2), Fbxl15(0.2), Sirt1(0.2), Siah2(0.19), Med11(0.19), Neurl3(0.19), Rnf217(0.19), …
translational initiation	0.000572465	0.246978	6.55694e-13	4.63969e-11	60	5.84068e-05	0.00434084	0.000428091	0.000498143	0.00290726	Eif1(0.38), Eif4a1(0.26), Denr(0.18), Eif4e2(0.17), Eif1a(0.16), Eif6(0.16), Eif3d(0.16), Eif2b2(0.16), Eif4e(0.14), Eif5b(0.13), Ddx3x(0.12), Eif2s2(0.12), Eif5(0.12), Eif3g(0.11), Eif3g(0.11), Eif1b(0.1), Eif2b3(0.1), Eif2s1(0.09), Eif3f(0.09), Eif3f(0.09), Eif3h(0.09), Eif3h(0.09), Eif4a2(0.08), Eif3b(0.08), Eif3b(0.08), Eif3e(0.07), Eif3e(0.07), Eif1ad(0.06), Eif3a(0.05), Ddx3y(0.05), Eif2s3x…
ubiquitin-protein transferase activity	0.000310951	0.116634	6.7528e-13	4.68459e-11	334	0.0246517	0.0534972	7.45639e-07	0.00218624	2.00001e-06	Ube2t(0.74), Rnf125(0.67), Traip(0.51), Asb4(0.49), Birc3(0.44), Birc3(0.44), Klhl21(0.39), Klhl21(0.39), Znrf1(0.35), Znrf1(0.35), Rnf19b(0.34), Rnf144b(0.34), Fbxo32(0.31), Smurf1(0.29), Smurf1(0.29), Smurf1(0.29), Cblb(0.29), Klhl8(0.29), Ube2g2(0.28), Ube2e2(0.28), Peli3(0.27), Ube2d1(0.26), Traf3(0.25), Arih2(0.24), Fbxo30(0.23), Ube2q2(0.23), Ube2o(0.23), Kctd13(0.23), Rmnd5b(0.22), Spsb1(0…
cytoplasmic mRNA processing body	0.000412715	0.227571	7.53713e-13	5.12815e-11	71	0.000820893	0.00201253	2.79989e-05	4.09349e-05	0.034	Zfp36(0.41), Ago4(0.37), Zfp36l1(0.31), Noct(0.24), Lsm2(0.24), Sqstm1(0.23), Zc3h12a(0.21), Pan2(0.2), Samd4(0.18), Trim5(0.18), Pan3(0.17), Wtip(0.17), Wtip(0.17), Dcp1a(0.16), Polr2d(0.15), Patl1(0.15), Patl1(0.15), Eif4e(0.14), Top1(0.13), Edc3(0.13), Psma6(0.12), Cnot9(0.12), Cnot7(0.11), Psma2(0.11), Ago2(0.11), Ago2(0.11), Psmc2(0.1), Lsm4(0.1), Ythdf2(0.1), Cnot3(0.1), Dcp1b(0.1), Limd1(0…
small-subunit processome	0.000343675	0.341138	2.72304e-12	1.81776e-10	32	5.28595e-08	0.0123374	0.000544252	0.00116611	0.0617519	Utp23(0.2), Fcf1(0.19), Dcaf13(0.19), Mphosph10(0.18), Rrp9(0.17), Nop58(0.16), Rps7(0.15), Utp3(0.15), Diexf(0.14), Pwp2(0.13), Nhp2l1(0.12), Utp14a(0.12), Nop14(0.11), Noc4l(0.11), Imp3(0.11), Wdr3(0.1), Nop56(0.09), Emg1(0.08), Ngdn(0.08), Heatr1(0.08), Utp11l(0.06), Utp18(0.06), Fbl(0.05), Imp4(0), Krr1(0), Tbl3(0), Utp6(-0.02), Wdr46(-0.03), Pdcd11(-0.05), Utp20(-0.06), Nol6(-0.07), Utp14b(-…
proteasome accessory complex	0.000565801	0.444874	3.43558e-12	2.25094e-10	18	0.000559959	0.00475448	6.14896e-07	0.0218029	0.00439957	Psmd11(0.25), Psmd11(0.25), Psmd8(0.17), Psmd14(0.14), Psmd3(0.13), Psmd4(0.12), Psmd1(0.12), Psmd2(0.11), Psmd6(0.11), Psmc2(0.1), Psmd13(0.1), Psmc1(0.09), Psmc4(0.08), Psmd12(0.07), Psmc6(0.07), Psmc3(0.05), Psmc5(0.04), Psmd5(0.02),
vesicle-mediated transport	0.000932173	0.134886	4.0385e-12	2.59786e-10	198	0.000666122	0.0105489	0.000591493	0.000447561	0.000666696	Ap3b2(0.56), Tvp23a(0.54), Stx1a(0.42), Ap1s2(0.41), Arf2(0.38), Napb(0.33), Sec22b(0.31), Stx11(0.29), Rab10(0.27), Spire2(0.27), Ap3s1(0.26), Arf5(0.26), Optn(0.25), Trappc4(0.24), Rab6a(0.22), Stx3(0.21), Golt1b(0.21), Ap4m1(0.2), Ahi1(0.19), Trip10(0.19), Vamp4(0.18), Rab11a(0.18), Vamp3(0.17), Arf6(0.16), Gga3(0.15), Stx12(0.13), Arf4(0.12), Kdelr2(0.12), Rhobtb3(0.12), Ap4e1(0.12), Vps4a(0.…
intracellular protein transport	0.000887755	0.129312	4.65627e-12	2.94176e-10	218	0.000725567	0.0283066	0.00103447	0.000453406	8.70041e-05	Drd1(0.57), Ap3b2(0.56), Ramp3(0.52), Stx1a(0.42), Ap1s2(0.41), Scg5(0.4), Rhob(0.39), Ankrd50(0.38), Napb(0.33), Sgsm1(0.33), Tbc1d15(0.31), Klc1(0.3), Stx11(0.29), Rab10(0.27), Ap3s1(0.26), Myrip(0.26), Ywhah(0.25), Ranbp17(0.25), Tbc1d8(0.24), Tbc1d9(0.24), Rab6a(0.22), Hid1(0.22), Hid1(0.22), Stx3(0.21), Snx1(0.21), Gpihbp1(0.21), Rims2(0.21), Snx18(0.21), Ap4m1(0.2), Ap4m1(0.2), Chml(0.18), …
nuclear pore	0.00051683	0.23407	6.22585e-12	3.86439e-10	73	5.91073e-06	0.157791	0.000640608	0.000183921	0.00143024	Nup210l(0.9), Ranbp17(0.25), Kpna4(0.22), Parp11(0.21), Kpna2(0.2), Senp2(0.18), Eif5a2(0.18), Rangap1(0.17), Mad2l1(0.17), Nup54(0.17), Nup93(0.16), Nup93(0.16), Ran(0.15), Rae1(0.15), Rae1(0.15), Ahctf1(0.14), Pom121(0.12), Pom121(0.12), Nup88(0.11), Nup88(0.11), Nup50(0.1), Nup50(0.1), Nupl1(0.1), Nupl1(0.1), Kpna1(0.09), Nup85(0.09), Kpna3(0.08), Nxt1(0.08), Nup43(0.08), Nup160(0.06), Nup160(…
protein deubiquitination	0.000905432	0.209592	1.35919e-11	8.29107e-10	78	0.000156006	0.135636	5.81789e-05	0.000514012	0.00113307	Usp13(0.71), Uchl1(0.55), Uchl1(0.55), Uchl3(0.39), Uchl3(0.39), Uchl3(0.39), Usp43(0.27), Usp31(0.23), Usp27x(0.22), Zc3h12a(0.21), Usp36(0.18), Atxn3(0.17), Usp42(0.16), Usp42(0.16), Dmwd(0.15), Tnfaip3(0.15), Josd2(0.15), Josd2(0.15), Usp28(0.15), Otud5(0.14), Usp14(0.14), Wdr48(0.14), Josd1(0.14), Otud7b(0.14), Usp22(0.1), Usp22(0.1), Usp7(0.1), Usp7(0.1), Usp12(0.09), Usp39(0.09), Eif3f(0.09…
positive regulation of gene expression	0.000212943	0.107249	1.60733e-11	9.63854e-10	325	0.00473929	4.00776e-11	0.00619285	0.00169048	0.37712	Il6(1.08), Il6(1.08), Atf3(0.85), Atf3(0.85), Lcn2(0.84), Ptpn22(0.83), Ptpn22(0.83), Itgb3(0.82), Serpine1(0.8), Wnt11(0.8), Il1b(0.74), Il1b(0.74), Lif(0.73), Trp53inp1(0.66), Ppp1r15a(0.63), Il7r(0.56), Ctgf(0.55), Lrrc32(0.55), Inhba(0.54), Cyp3a13(0.49), Egr1(0.48), Relb(0.48), Atf4(0.45), Atf4(0.45), Prdm1(0.43), Smad1(0.42), Smad1(0.42), Sox9(0.41), Sox9(0.41), Tnc(0.41), Nfil3(0.4), Nfil3…
cytokine-mediated signaling pathway	0.00045004	0.196391	1.76903e-11	1.037e-09	96	0.00215411	1.01914e-07	0.000296955	0.0011386	0.393028	Il1f9(1.34), Il6(1.08), Pirb(0.98), Il1f6(0.97), Csf2rb(0.8), Il1b(0.74), Il1b(0.74), Irak3(0.72), Ereg(0.71), Ereg(0.71), Nyx(0.63), Socs3(0.59), Grem2(0.51), Il1rn(0.49), Il20rb(0.47), Klf6(0.42), Socs2(0.38), Ptprn(0.37), Rela(0.36), Numbl(0.34), Pf4(0.34), Il6ra(0.28), Sh2b2(0.28), Il1rap(0.26), Socs5(0.25), Rtn4rl2(0.24), Kras(0.23), Cish(0.2), Il3ra(0.2), Fkbp1a(0.19), Ifngr2(0.19), Il1r1(0…
Arp2/3 protein complex	0.00107729	0.466636	1.78794e-11	1.037e-09	15	0.0028998	9.76603e-05	0.00454644	7.41989e-05	0.0275502	Arpc1b(0.32), Arpc1b(0.32), Arpc5(0.24), Arpc5(0.24), Arpc3(0.23), Arpc3(0.23), Actr3b(0.23), Arpc2(0.17), Arpc2(0.17), Actr3(0.14), Arpc4(0.09), Arpc4(0.09), Arpc1a(0.06), Actr2(0.05), Arpc5l(0.02),
negative regulation of extrinsic apoptotic signaling pathway via death domain receptors	0.00123345	0.333581	2.54451e-11	1.45201e-09	29	0.0104239	0.000714494	0.000957173	0.000202788	0.00541584	Fgb(1.88), Fgg(1.46), Fga(1.06), Serpine1(0.8), Hmox1(0.61), Tnfrsf23(0.61), Itprip(0.48), Sfrp2(0.38), Tnfrsf22(0.37), Cflar(0.27), Cflar(0.27), Tmbim1(0.25), Raf1(0.19), Raf1(0.19), Pea15a(0.18), Pea15a(0.18), Rffl(0.18), Hgf(0.16), Tnfaip3(0.15), Tnfaip3(0.15), Faim(0.1), Hmgb2(0.09), Psen2(0.03), Nol3(-0.03), Icam1(-0.08), Dapk1(-0.1), Gpx1(-0.11), Rnf34(-0.14), Brca1(-0.57),
eukaryotic translation initiation factor 3 complex	0.00141371	0.333019	4.28227e-11	2.40487e-09	29	0.000363511	0.0017153	0.000737731	0.000498638	0.0412266	Eif3d(0.16), Eif3d(0.16), Ddx3x(0.12), Eif3g(0.11), Eif3g(0.11), Eif3j1(0.11), Eif3j1(0.11), Eif3f(0.09), Eif3f(0.09), Eif3h(0.09), Eif3h(0.09), Eif3b(0.08), Eif3b(0.08), Eif3e(0.07), Eif3e(0.07), Eif3a(0.05), Eif3a(0.05), Eif3i(0.05), Eif3i(0.05), Abce1(0.04), Eif3c(0.04), Eif3c(0.04), Eif3k(-0.01), Eif3k(-0.01), Eif3m(-0.01), Eif3l(-0.03), Eif3l(-0.03), Eif3j2(-0.03), Eif3j2(-0.03),
chemokine-mediated signaling pathway	0.000200172	0.417198	4.8438e-11	2.67771e-09	29	0.0020498	2.41874e-07	0.100728	7.79732e-08	0.48189	Cxcl3(2.56), Cxcl2(1.86), Cxcl5(1.43), Ppbp(1.29), Ccl20(0.91), Ccl22(0.73), Ccl6(0.68), Cxcl1(0.59), Ccr1(0.4), Pf4(0.34), Ptk2b(0.1), Ccl9(0.1), Ccl25(0.04), Ccl21a(0.03), Ccl5(0.03), Ccl5(0.03), Cxcl10(-0.05), Cxcl10(-0.05), Ccl2(-0.17), Ccl2(-0.17), Ccl11(-0.23), Ackr3(-0.31), Cx3cl1(-0.32), Ccl7(-0.39), Cxcl13(-0.39), Cxcl13(-0.39), Cxcl12(-0.81), Cxcl12(-0.81), Ccl4(-0.87),
ribosomal large subunit biogenesis	0.000942575	0.348784	6.04223e-11	3.28883e-09	26	9.92062e-07	0.0015024	0.0136926	0.00690865	0.0224195	Rpl11(0.3), Rpl5(0.26), Rpl14(0.19), Rpl14(0.19), Sdad1(0.17), Rrs1(0.16), Nip7(0.16), Nop16(0.13), Rpl35a(0.12), Rpl35a(0.12), Noc2l(0.11), Rpl26(0.1), Rpl26(0.1), Npm1(0.09), Npm1(0.09), Surf6(0.09), Zfp622(0.08), Wdr55(0.07), Wdr74(0.07), Rpl7(0.06), Malsu1(0.06), Nle1(0.02), Aamp(0), Ebna1bp2(-0.01), Bop1(-0.04), Yae1d1(-0.11),
autophagy	0.000993709	0.166569	8.49707e-11	4.55494e-09	135	0.0115347	0.0506978	3.46352e-05	0.000256971	0.00176344	S100a9(1.61), S100a8(1.6), Ptpn22(0.83), Usp13(0.71), Trp53inp1(0.66), Vmp1(0.48), 3110043O21Rik(0.4), 3110043O21Rik(0.4), Wipi1(0.33), Npc1(0.3), Tecpr1(0.3), Fam134b(0.28), Dap(0.26), Optn(0.25), Sqstm1(0.23), Phf23(0.23), Map1lc3a(0.22), Atg16l2(0.22), Atg2a(0.21), Wipi2(0.2), Xbp1(0.19), Atg101(0.19), Anxa7(0.18), Psen1(0.18), Chmp4b(0.18), Stbd1(0.17), Tollip(0.17), Atg4b(0.17), Atg4b(0.17),…
tubulin-glutamic acid ligase activity	0.00148689	0.12343	8.97031e-11	4.73686e-09	220	0.0136521	0.0264984	1.19911e-05	0.00314625	0.000780053	Rnf125(0.67), Traip(0.51), Rad18(0.47), Birc3(0.44), Rnf180(0.43), Mkrn3(0.42), Znrf1(0.35), Rnf19b(0.34), Rnf144b(0.34), Trim39(0.33), Smurf1(0.29), Cblb(0.29), Peli3(0.27), Traf3(0.25), Arih2(0.24), March3(0.24), Rnf4(0.21), Mid1(0.2), Rnf103(0.2), Pias3(0.2), Siah2(0.19), Dtx2(0.19), Neurl3(0.19), Rnf217(0.19), Rbbp6(0.18), Ube2i(0.18), Rffl(0.18), Ube2f(0.18), Kcmf1(0.18), Siah1a(0.17), Hace1…
positive regulation of cell proliferation	0.000786649	0.0866572	1.0253e-10	5.3026e-09	428	0.0242001	2.36414e-08	0.0528534	0.000659255	0.0255274	Pgf(1.53), Cxcr2(1.44), Ptgs2(1.16), Il6(1.08), Osm(1), Apln(0.98), Esm1(0.94), Il11(0.92), Il11(0.92), Atf3(0.85), Nog(0.78), Edn1(0.76), Edn1(0.76), Hilpda(0.74), Lif(0.73), Lif(0.73), Gdnf(0.72), Ereg(0.71), Ereg(0.71), Adora2b(0.67), Clu(0.67), Sox4(0.67), Sox4(0.67), Sphk1(0.66), S1pr1(0.56), Ctgf(0.55), Adrb2(0.54), Rasip1(0.54), Il31ra(0.54), Csf3(0.53), Csf3(0.53), Nmb(0.51), Marcksl1(0.4…
protein serine/threonine kinase activity	0.00102976	0.0873913	1.03414e-10	5.3026e-09	468	0.0224293	0.0779475	0.000136569	1.93995e-06	0.00569302	Pak3(0.85), Pim1(0.76), Pim1(0.76), Irak3(0.72), Irak3(0.72), Hipk4(0.65), Syk(0.6), Trpm6(0.59), Plk4(0.52), Plk4(0.52), Plk2(0.42), Plk2(0.42), Camk2d(0.42), Camk2d(0.42), Camk2d(0.42), Map3k6(0.38), Plk3(0.37), Plk3(0.37), Rps6kl1(0.37), Prkx(0.36), Pim3(0.36), Pim3(0.36), Map3k8(0.34), Map4k4(0.34), Map4k4(0.34), Dbf4(0.34), Csnk1e(0.33), Csnk1e(0.33), Mapk13(0.31), Mapk6(0.3), Myo3b(0.3), Br…
protein domain specific binding	0.00198286	0.113216	1.17619e-10	5.94478e-09	242	0.00291371	0.00687283	0.00274949	0.000180647	0.00460343	Il1b(0.74), Ercc1(0.62), Syk(0.6), Id3(0.53), Tuba1a(0.45), Hpcal4(0.43), Stx1a(0.42), Rap2b(0.42), Shc4(0.42), Unc13a(0.41), Plaur(0.39), Ywhag(0.36), Irs2(0.33), Hspa5(0.3), Actn1(0.3), Ica1l(0.29), Homer3(0.27), Cdh1(0.26), Itga3(0.26), Sfn(0.26), Vrk2(0.26), Ywhah(0.25), Card9(0.24), Akap2(0.23), Gja1(0.23), Ezr(0.23), Kctd13(0.23), Itgb1(0.22), Rab6a(0.22), Src(0.22), Ywhaq(0.22), Nde1(0.22)…
I-kappaB kinase/NF-kappaB signaling	0.00119601	0.298408	1.21973e-10	6.07805e-09	35	0.000773281	0.00243211	3.59136e-05	0.000599738	0.167228	Tifa(0.63), Relb(0.48), Bcl10(0.32), Bcl10(0.32), Tirap(0.3), Tirap(0.3), Nfkb2(0.27), Nfkb1(0.24), Card9(0.24), Rel(0.23), Rel(0.23), Rock2(0.23), Tlr8(0.19), Nfkbil1(0.18), Btk(0.17), Tank(0.17), Tnip2(0.17), Nlrc3(0.17), Nlrc3(0.17), Snip1(0.15), Map3k14(0.14), Ripk3(0.14), Ripk2(0.14), Irak2(0.11), Azi2(0.09), Rock1(0.06), Hacd3(0.06), Bcl3(0.05), Ikbkb(-0.01), Irf1(-0.03), Traf6(-0.04), Malt…
cellular response to lipopolysaccharide	0.000702847	0.186538	1.29992e-10	6.31567e-09	95	0.0099046	3.15166e-06	0.00204344	1.15216e-05	0.427159	Cd80(2.51), Cd14(1.38), Cd14(1.38), Acod1(1.34), Acod1(1.34), Il6(1.08), Il6(1.08), Fcgr4(0.92), Serpine1(0.8), Pde4b(0.64), Cebpb(0.52), Zfp36(0.41), Zfp36(0.41), Cd300lb(0.4), Rela(0.36), Rela(0.36), Litaf(0.32), Tlr4(0.28), Tlr4(0.28), Pde4d(0.28), Il18(0.25), Nfkbib(0.25), Nr1d1(0.25), Nfkb1(0.24), Plscr1(0.24), Ankrd1(0.24), Ankrd1(0.24), Sbno2(0.22), Zc3h12a(0.21), Zc3h12a(0.21), Zc3h12a(0.…
protein-glutamic acid ligase activity	0.00162207	0.123968	1.30312e-10	6.31567e-09	218	0.0131881	0.0293515	1.51694e-05	0.00381105	0.000729093	Rnf125(0.67), Traip(0.51), Rad18(0.47), Birc3(0.44), Rnf180(0.43), Mkrn3(0.42), Znrf1(0.35), Rnf19b(0.34), Rnf144b(0.34), Trim39(0.33), Smurf1(0.29), Cblb(0.29), Peli3(0.27), Traf3(0.25), Arih2(0.24), March3(0.24), Rnf4(0.21), Mid1(0.2), Rnf103(0.2), Pias3(0.2), Siah2(0.19), Dtx2(0.19), Neurl3(0.19), Rnf217(0.19), Rbbp6(0.18), Ube2i(0.18), Rffl(0.18), Ube2f(0.18), Kcmf1(0.18), Siah1a(0.17), Hace1…
Cajal body	0.00117804	0.301057	1.35852e-10	6.49518e-09	34	9.09788e-06	0.0345397	0.000243131	0.00529705	0.0243661	Isg20(0.32), Coil(0.26), Coil(0.26), Ell(0.24), Uspl1(0.21), Smn1(0.17), Smn1(0.17), Zpr1(0.17), Zpr1(0.17), Nop58(0.16), Nolc1(0.13), Lsm10(0.13), Cdk2(0.12), Prpf3(0.12), Ice1(0.12), Sart1(0.11), Wrap53(0.09), Lsg1(0.09), Prpf4(0.08), Dkc1(0.08), Dkc1(0.08), Angel2(0.07), Sart3(0.06), Sart3(0.06), Fbl(0.05), Fbl(0.05), Toe1(0.04), Oip5(0.03), Eftud2(-0.03), Prpf31(-0.04), Npat(-0.04), Hinfp(-0.…
positive regulation of telomerase RNA localization to Cajal body	0.00146831	0.450369	1.71881e-10	8.10818e-09	15	1.25676e-05	0.0180699	0.0359289	0.000504923	0.00413922	Shq1(0.19), Tcp1(0.17), Ruvbl2(0.16), Cct5(0.14), Cct7(0.14), Nop10(0.13), Nop10(0.13), Nhp2(0.12), Cct2(0.09), Dkc1(0.08), Cct3(0.07), Cct4(0.07), Cct8(0.06), Ruvbl1(0.02), Naf1(-0.06),
protein-glycine ligase activity	0.00169495	0.123946	1.77587e-10	8.26714e-09	218	0.013203	0.0370613	1.52304e-05	0.00381842	0.000731051	Rnf125(0.67), Traip(0.51), Rad18(0.47), Birc3(0.44), Rnf180(0.43), Mkrn3(0.42), Znrf1(0.35), Rnf19b(0.34), Rnf144b(0.34), Trim39(0.33), Smurf1(0.29), Cblb(0.29), Peli3(0.27), Traf3(0.25), Arih2(0.24), March3(0.24), Rnf4(0.21), Mid1(0.2), Rnf103(0.2), Pias3(0.2), Siah2(0.19), Dtx2(0.19), Neurl3(0.19), Rnf217(0.19), Rbbp6(0.18), Ube2i(0.18), Rffl(0.18), Ube2f(0.18), Kcmf1(0.18), Siah1a(0.17), Hace1…
UDP-N-acetylmuramoylalanyl-D-glutamyl-2,6-diaminopimelate-D-alanyl-D-alanine ligase activity	0.00180718	0.123338	2.07045e-10	8.82563e-09	217	0.0138842	0.0309011	1.8559e-05	0.00419505	0.000834962	Rnf125(0.67), Traip(0.51), Rad18(0.47), Birc3(0.44), Rnf180(0.43), Mkrn3(0.42), Znrf1(0.35), Rnf19b(0.34), Rnf144b(0.34), Trim39(0.33), Smurf1(0.29), Cblb(0.29), Peli3(0.27), Traf3(0.25), Arih2(0.24), March3(0.24), Rnf4(0.21), Mid1(0.2), Rnf103(0.2), Pias3(0.2), Siah2(0.19), Dtx2(0.19), Neurl3(0.19), Rnf217(0.19), Rbbp6(0.18), Ube2i(0.18), Rffl(0.18), Ube2f(0.18), Kcmf1(0.18), Siah1a(0.17), Hace1…
ribosomal S6-glutamic acid ligase activity	0.00180718	0.123338	2.07045e-10	8.82563e-09	217	0.0138842	0.0309011	1.8559e-05	0.00419505	0.000834962	Rnf125(0.67), Traip(0.51), Rad18(0.47), Birc3(0.44), Rnf180(0.43), Mkrn3(0.42), Znrf1(0.35), Rnf19b(0.34), Rnf144b(0.34), Trim39(0.33), Smurf1(0.29), Cblb(0.29), Peli3(0.27), Traf3(0.25), Arih2(0.24), March3(0.24), Rnf4(0.21), Mid1(0.2), Rnf103(0.2), Pias3(0.2), Siah2(0.19), Dtx2(0.19), Neurl3(0.19), Rnf217(0.19), Rbbp6(0.18), Ube2i(0.18), Rffl(0.18), Ube2f(0.18), Kcmf1(0.18), Siah1a(0.17), Hace1…
coenzyme F420-0 gamma-glutamyl ligase activity	0.00180718	0.123338	2.07045e-10	8.82563e-09	217	0.0138842	0.0309011	1.8559e-05	0.00419505	0.000834962	Rnf125(0.67), Traip(0.51), Rad18(0.47), Birc3(0.44), Rnf180(0.43), Mkrn3(0.42), Znrf1(0.35), Rnf19b(0.34), Rnf144b(0.34), Trim39(0.33), Smurf1(0.29), Cblb(0.29), Peli3(0.27), Traf3(0.25), Arih2(0.24), March3(0.24), Rnf4(0.21), Mid1(0.2), Rnf103(0.2), Pias3(0.2), Siah2(0.19), Dtx2(0.19), Neurl3(0.19), Rnf217(0.19), Rbbp6(0.18), Ube2i(0.18), Rffl(0.18), Ube2f(0.18), Kcmf1(0.18), Siah1a(0.17), Hace1…
coenzyme F420-2 alpha-glutamyl ligase activity	0.00180718	0.123338	2.07045e-10	8.82563e-09	217	0.0138842	0.0309011	1.8559e-05	0.00419505	0.000834962	Rnf125(0.67), Traip(0.51), Rad18(0.47), Birc3(0.44), Rnf180(0.43), Mkrn3(0.42), Znrf1(0.35), Rnf19b(0.34), Rnf144b(0.34), Trim39(0.33), Smurf1(0.29), Cblb(0.29), Peli3(0.27), Traf3(0.25), Arih2(0.24), March3(0.24), Rnf4(0.21), Mid1(0.2), Rnf103(0.2), Pias3(0.2), Siah2(0.19), Dtx2(0.19), Neurl3(0.19), Rnf217(0.19), Rbbp6(0.18), Ube2i(0.18), Rffl(0.18), Ube2f(0.18), Kcmf1(0.18), Siah1a(0.17), Hace1…
protein-glycine ligase activity, initiating	0.00180718	0.123338	2.07045e-10	8.82563e-09	217	0.0138842	0.0309011	1.8559e-05	0.00419505	0.000834962	Rnf125(0.67), Traip(0.51), Rad18(0.47), Birc3(0.44), Rnf180(0.43), Mkrn3(0.42), Znrf1(0.35), Rnf19b(0.34), Rnf144b(0.34), Trim39(0.33), Smurf1(0.29), Cblb(0.29), Peli3(0.27), Traf3(0.25), Arih2(0.24), March3(0.24), Rnf4(0.21), Mid1(0.2), Rnf103(0.2), Pias3(0.2), Siah2(0.19), Dtx2(0.19), Neurl3(0.19), Rnf217(0.19), Rbbp6(0.18), Ube2i(0.18), Rffl(0.18), Ube2f(0.18), Kcmf1(0.18), Siah1a(0.17), Hace1…
protein-glycine ligase activity, elongating	0.00180718	0.123338	2.07045e-10	8.82563e-09	217	0.0138842	0.0309011	1.8559e-05	0.00419505	0.000834962	Rnf125(0.67), Traip(0.51), Rad18(0.47), Birc3(0.44), Rnf180(0.43), Mkrn3(0.42), Znrf1(0.35), Rnf19b(0.34), Rnf144b(0.34), Trim39(0.33), Smurf1(0.29), Cblb(0.29), Peli3(0.27), Traf3(0.25), Arih2(0.24), March3(0.24), Rnf4(0.21), Mid1(0.2), Rnf103(0.2), Pias3(0.2), Siah2(0.19), Dtx2(0.19), Neurl3(0.19), Rnf217(0.19), Rbbp6(0.18), Ube2i(0.18), Rffl(0.18), Ube2f(0.18), Kcmf1(0.18), Siah1a(0.17), Hace1…
tubulin-glycine ligase activity	0.00180718	0.123338	2.07045e-10	8.82563e-09	217	0.0138842	0.0309011	1.8559e-05	0.00419505	0.000834962	Rnf125(0.67), Traip(0.51), Rad18(0.47), Birc3(0.44), Rnf180(0.43), Mkrn3(0.42), Znrf1(0.35), Rnf19b(0.34), Rnf144b(0.34), Trim39(0.33), Smurf1(0.29), Cblb(0.29), Peli3(0.27), Traf3(0.25), Arih2(0.24), March3(0.24), Rnf4(0.21), Mid1(0.2), Rnf103(0.2), Pias3(0.2), Siah2(0.19), Dtx2(0.19), Neurl3(0.19), Rnf217(0.19), Rbbp6(0.18), Ube2i(0.18), Rffl(0.18), Ube2f(0.18), Kcmf1(0.18), Siah1a(0.17), Hace1…
negative regulation of apoptotic process	0.00114944	0.0844765	2.36464e-10	9.95965e-09	462	0.00113028	0.00092075	0.000820958	0.000531306	0.0908149	Pdcd1(1.59), Cxcr2(1.44), Cxcr2(1.44), Mmp9(1.42), Hspa1b(1.3), Il6(1.08), Dusp1(0.83), Wnt11(0.8), Pim1(0.76), Pim1(0.76), Clu(0.67), Sphk1(0.66), Socs3(0.59), Cdkn1a(0.54), Spp1(0.53), Chst11(0.52), Il1rn(0.49), Btg2(0.48), Jun(0.46), Cldn7(0.43), Ier3(0.42), Plk2(0.42), Angptl4(0.42), Angptl4(0.42), Sox9(0.41), Sox9(0.41), Hsp90ab1(0.4), Cyr61(0.4), Plaur(0.39), Plk3(0.37), Ago4(0.37), Rela(0.…
chromosome	0.000405978	0.126775	2.59666e-10	1.08082e-08	260	0.000122319	0.101854	8.78519e-05	0.00170244	0.0114846	Mbd1(0.57), Rassf2(0.42), Lrmp(0.31), Zwint(0.31), Mis18a(0.3), Cenpu(0.3), H2afx(0.28), Cenpl(0.28), Hist1h1c(0.27), Hist3h2a(0.27), Nek2(0.26), Ppp2cb(0.26), Meaf6(0.26), H2afj(0.25), Cenpt(0.24), Sycp3(0.23), Zfp330(0.23), Sycp2(0.23), Nde1(0.22), Bub1b(0.21), Brd4(0.21), Rsph1(0.2), Mis12(0.2), Ndnl2(0.19), Nsfl1c(0.19), Daxx(0.18), Ezh2(0.18), Rbbp6(0.18), Mphosph10(0.18), Smc5(0.18), Incenp…
protein folding	0.00239029	0.160353	3.55504e-10	1.46253e-08	115	0.000405283	0.0302703	0.00436929	0.00304571	0.000708072	Tbce(0.94), Dnajb13(0.8), Hsp90aa1(0.65), Dnajb1(0.58), Dnaja4(0.57), Hspe1(0.43), Hsp90ab1(0.4), Hspa4l(0.39), Hspd1(0.28), Dnajb5(0.24), Fkbp1a(0.19), Txnl1(0.19), Qsox1(0.19), Cryab(0.18), Grpel2(0.18), Pdia6(0.18), Tcp1(0.17), Txn1(0.17), Ppie(0.17), Dnajb6(0.15), Cct5(0.14), Cct7(0.14), Vbp1(0.12), Ppil4(0.12), Calr(0.11), Dnaja1(0.11), Tmx4(0.11), Fkbp2(0.1), Ppid(0.1), Ppig(0.1), Cct2(0.09…
regulation of cell proliferation	0.00119562	0.125065	4.17284e-10	1.69696e-08	193	0.00979142	3.06567e-06	0.00561003	7.31532e-05	0.295851	Cxcl3(2.56), Cxcl2(1.86), Cxcl5(1.43), Ppbp(1.29), Ptgs2(1.16), Mmp7(1.09), Il6(1.08), Serpine1(0.8), Relt(0.74), Sat1(0.58), Nr5a2(0.57), Fgr(0.54), Tes(0.52), Chst11(0.52), Txk(0.51), Junb(0.48), Nfkbia(0.48), Tnfrsf26(0.48), Prg4(0.46), Prdm1(0.43), Sox9(0.41), Tnc(0.41), Fntb(0.41), Sfrp2(0.38), Txnip(0.37), Jund(0.34), Pf4(0.34), Pf4(0.34), Fes(0.33), Fes(0.33), Il4ra(0.3), Spry2(0.3), Matk(…
ER-associated ubiquitin-dependent protein catabolic process	0.00232652	0.213374	4.8149e-10	1.93581e-08	65	0.00143328	0.0168378	0.00120812	0.00734313	0.000983336	Ube2g2(0.28), Ube2g2(0.28), Yod1(0.22), Dnajb9(0.21), Dnajb9(0.21), Ubxn4(0.21), Ube2j2(0.21), Ube2j2(0.21), Rnf103(0.2), Vcp(0.17), Ube2j1(0.16), Ube2j1(0.16), Ubqln2(0.14), Edem1(0.14), Ubxn8(0.11), Psmc2(0.1), Man1b1(0.1), Man1b1(0.1), Psmc1(0.09), Amfr(0.09), Amfr(0.09), Fbxo6(0.09), Rnf121(0.09), Psmc4(0.08), Syvn1(0.08), Syvn1(0.08), Psmc6(0.07), AI314180(0.07), Nrros(0.06), Psmc3(0.05), Hs…
positive regulation of I-kappaB kinase/NF-kappaB signaling	0.00270132	0.148171	6.26851e-10	2.49191e-08	132	0.000305158	0.012765	0.000835491	0.0053398	0.0130869	Tlr6(0.77), Il1b(0.74), Il1b(0.74), Il1b(0.74), Hmox1(0.61), Gprc5b(0.44), Gprc5b(0.44), Plk2(0.42), Rhoc(0.37), Rela(0.36), Litaf(0.32), Mier1(0.3), Tirap(0.3), Tlr4(0.28), Zc3hav1(0.27), Zdhhc13(0.25), Gja1(0.23), Abl2(0.22), Golt1b(0.21), Fyn(0.2), Fkbp1a(0.19), Myd88(0.18), Myd88(0.18), Ube2i(0.18), Ube2v1(0.18), Ppm1a(0.17), Akap13(0.17), Tnip2(0.17), Casp8(0.16), Shisa5(0.16), Map3k14(0.14)…
non-membrane spanning protein tyrosine kinase activity	0.00167529	0.241816	1.00049e-09	3.93303e-08	52	0.000633799	5.32102e-05	0.000937756	0.00607251	0.243379	Syk(0.6), Syk(0.6), Fgr(0.54), Fgr(0.54), Txk(0.51), Fes(0.33), Fes(0.33), Matk(0.26), Itk(0.25), Itk(0.25), Tec(0.24), Tec(0.24), Abl2(0.22), Src(0.22), Peak1(0.22), Fyn(0.2), Btk(0.17), Tnk2(0.17), Bmx(0.16), Bmx(0.16), Hck(0.16), Jak2(0.16), Ptk2(0.14), Ptk2(0.14), Ptk2(0.14), Ripk2(0.14), Dyrk1a(0.11), Pkdcc(0.11), Pkdcc(0.11), Ptk2b(0.1), Ptk2b(0.1), Csk(0.08), Frk(0.08), Tnk1(0.08), Jak1(0.…
mRNA transport	0.00212247	0.199845	1.01883e-09	3.96113e-08	79	0.000875243	0.0500512	0.000423941	0.00460947	0.00356963	Zfp36(0.41), Cpeb1(0.34), Zfp36l1(0.31), Alyref2(0.27), Ranbp17(0.25), Igf2bp2(0.23), Parp11(0.21), Poldip3(0.19), Senp2(0.18), Eif5a2(0.18), Srsf3(0.17), Casc3(0.17), Nup54(0.17), Magoh(0.16), Zc3h11a(0.16), Nup93(0.16), Qk(0.15), Srsf7(0.15), Ahctf1(0.14), Kif5c(0.12), Slbp(0.12), Pom121(0.12), Nup88(0.11), Thoc7(0.1), Nupl1(0.1), Alyref(0.09), Thoc1(0.09), Nup85(0.09), Nxt1(0.08), Ncbp3(0.08),…
thiol-dependent ubiquitinyl hydrolase activity	0.0026829	0.210232	1.42002e-09	5.46088e-08	65	0.00367329	0.097647	0.000142544	0.00444333	0.00109603	Usp13(0.71), Uchl1(0.55), Uchl3(0.39), Usp43(0.27), Otud1(0.26), Usp27x(0.22), Yod1(0.22), Zc3h12a(0.21), Usp36(0.18), Usp53(0.17), Atxn3(0.17), Usp42(0.16), Tnfaip3(0.15), Josd2(0.15), Usp28(0.15), Otud5(0.14), Usp14(0.14), Otud7b(0.14), Zranb1(0.14), Otulin(0.14), Otud3(0.13), Alg13(0.12), Usp22(0.1), Usp7(0.1), Usp12(0.09), Usp39(0.09), Eif3f(0.09), Usp54(0.09), Usp21(0.07), Usp45(0.07), Otud4…
ATP-dependent RNA helicase activity	0.0025472	0.222922	1.64822e-09	6.27033e-08	61	8.8873e-06	0.0416049	0.00591954	0.00294931	0.0264925	Eif4a1(0.26), Ddx28(0.23), Ddx19b(0.21), Ddx31(0.2), Dhx40(0.17), Ddx54(0.15), Ddx54(0.15), Ddx21(0.14), Ddx21(0.14), Ddx52(0.13), Ddx3x(0.12), Ddx3x(0.12), Dhx8(0.11), Ddx27(0.11), Ddx23(0.1), Eif4a2(0.08), Ddx39(0.08), Ddx5(0.07), Ddx5(0.07), Dhx38(0.07), Ddx47(0.07), Dhx33(0.07), Ddx6(0.06), Upf1(0.06), Dhx15(0.05), Ddx3y(0.05), Ddx39b(0.05), Ddx39b(0.05), Dhx32(0.05), Eif4a3(0.05), Eif4a3(0.0…
hormone activity	0.00267726	0.285921	1.7849e-09	6.71805e-08	35	0.00285319	0.00029156	0.000241782	0.0131638	0.0994143	Retnlg(1.71), Gal(1.34), Inhbb(1.02), Apln(0.98), Fam132b(0.93), Calca(0.84), Edn1(0.76), Ucn2(0.64), Npy(0.61), Inhba(0.54), Ttr(0.46), Nppb(0.26), Insl3(0.19), Stc1(0.19), Metrnl(0.16), Igf2(0.15), Adm2(0.14), Adm(0.13), Thpo(0.1), Tor2a(0.08), Edn3(0.01), Copa(-0.04), Cck(-0.08), Insl6(-0.14), Fam132a(-0.14), Stc2(-0.26), Fbn1(-0.27), Angptl8(-0.27), Fndc5(-0.37), Agt(-0.42), Igf1(-0.87), Adip…
preribosome, large subunit precursor	0.00201374	0.322258	1.85362e-09	6.90326e-08	28	2.02537e-06	0.0191889	0.0160689	0.0043007	0.0413008	Las1l(0.28), Rrp1b(0.2), Nsa2(0.19), Ppan(0.17), Eif6(0.16), Rrs1(0.16), Nip7(0.16), Rplp2(0.16), Rplp0(0.15), Rrp15(0.15), Rplp1(0.11), Mak16(0.11), Tex10(0.11), Zfp622(0.08), Ftsj3(0.08), Pes1(0.08), Wdr74(0.07), Ccdc86(0.05), Wdr37(0.05), Rpf1(0.03), Mrto4(0), Aamp(0), Rrp1(-0.01), Ebna1bp2(-0.01), Wdr12(-0.02), Wdr12(-0.02), Bop1(-0.04), Mdn1(-0.1),
cysteine-type peptidase activity	0.0039088	0.1461	3.47092e-09	1.27918e-07	127	0.00243509	0.069535	0.00213747	0.00445631	0.000724375	Ctla2b(0.91), Ctla2a(0.85), Usp13(0.71), Uchl1(0.55), Ctsl(0.43), Uchl3(0.39), Hmces(0.35), Ctsc(0.34), 4930486L24Rik(0.29), Casp3(0.28), Casp3(0.28), Cflar(0.27), Ctss(0.27), Usp43(0.27), Otud1(0.26), Usp27x(0.22), Yod1(0.22), Desi1(0.21), Zc3h12a(0.21), Uspl1(0.21), Casp4(0.2), Tinagl1(0.2), Usp36(0.18), Senp2(0.18), Atg4b(0.17), Atg4b(0.17), Atxn3(0.17), Casp8(0.16), Usp42(0.16), Tnfaip3(0.15)…
pre-autophagosomal structure	0.00186442	0.38738	4.08315e-09	1.4893e-07	21	0.0577877	0.18257	2.00395e-06	0.00232299	0.00148855	Vmp1(0.48), Wipi1(0.33), Wipi1(0.33), Sqstm1(0.23), Atg2a(0.21), Wipi2(0.2), Atg101(0.19), Atg101(0.19), Atg13(0.16), Stx12(0.13), Ulk1(0.1), Zfyve1(0.08), D17Wsu92e(0.07), Nbr1(0.06), Atg7(0.06), Atg9a(0.06), Atg9a(0.06), Rb1cc1(0.04), Becn1(0.03), Trappc8(-0.1), Atg2b(-0.18),
positive regulation of interferon-gamma production	0.00153288	0.295749	4.41846e-09	1.58934e-07	33	1.89673e-05	8.96139e-05	0.0113035	0.021911	0.242285	Cd14(1.38), Il1b(0.74), Pde4b(0.64), Txk(0.51), Runx1(0.28), Hspd1(0.28), Hspd1(0.28), Hspd1(0.28), Tlr4(0.28), Il18(0.25), Il18(0.25), Nras(0.25), Tnfsf9(0.23), Slc11a1(0.21), Fzd5(0.18), Il18r1(0.18), Ripk2(0.14), Ccr2(0.12), Ifnar1(0.12), Hras(0.1), H2-M3(0.06), Sash3(0.06), Havcr2(0.06), Bcl3(0.05), Flt3(0.04), Fadd(-0.03), Pycard(-0.08), Irf8(-0.09), Carmil2(-0.1), Il12rb2(-0.14), Tnf(-0.26)…
chromatin remodeling	0.00422964	0.183873	4.44728e-09	1.58934e-07	79	0.00755468	0.00499632	0.000772324	0.00422053	0.0200478	Sox9(0.41), Cebpg(0.32), Chd7(0.26), Morf4l2(0.25), Scmh1(0.22), Chd1(0.21), Daxx(0.18), Myc(0.18), Ruvbl2(0.16), Ruvbl2(0.16), Actr6(0.16), Baz1a(0.16), Mysm1(0.16), Smarca5(0.15), Smarca5(0.15), Smarca5(0.15), Top1(0.13), Top1(0.13), Mta2(0.13), Chrac1(0.12), Msl3(0.11), Vps72(0.11), Ino80b(0.11), 2410016O06Rik(0.09), Kat2b(0.07), Chd1l(0.07), Smarcd2(0.07), Brdt(0.07), Brdt(0.07), Pih1d1(0.06)…
RNA secondary structure unwinding	0.00383784	0.255176	4.66716e-09	1.65124e-07	41	0.000383374	0.0128555	0.00520006	0.000995916	0.0557327	Ago4(0.37), Eif4a1(0.26), Ddx28(0.23), Ddx19b(0.21), Ddx31(0.2), Ddx54(0.15), Ddx21(0.14), Ddx52(0.13), Ddx3x(0.12), Ddx3x(0.12), Ddx27(0.11), Ago2(0.11), Ddx23(0.1), Eif4a2(0.08), Ddx39(0.08), Ddx5(0.07), Ddx47(0.07), Ddx6(0.06), Ddx3y(0.05), Ddx39b(0.05), Ddx39b(0.05), Eif4a3(0.05), Ddx46(0.05), Ddx10(0.04), Ddx24(0.03), Ddx20(0.03), Ddx19a(0.02), Ddx59(0.02), Ddx51(0.02), Ddx41(0.02), Ddx50(0.…
protein dephosphorylation	0.00374989	0.136472	4.88688e-09	1.71186e-07	144	0.0152392	0.000321903	0.0078743	0.000929268	0.0427108	Dusp1(0.83), Ptpn22(0.83), Ptpn22(0.83), Ppm1j(0.58), Ptprn(0.37), Dusp10(0.36), Dusp8(0.35), Cttnbp2nl(0.35), Cttnbp2nl(0.35), Ptpn12(0.31), Ptpn12(0.31), Ctdp1(0.31), Ppp2r2a(0.31), Ptpn2(0.3), Ptpn2(0.3), Ptpn2(0.3), Ppp2cb(0.26), Ptpre(0.25), Ptprc(0.24), Dusp7(0.24), Ctdsp2(0.21), Fam220a(0.2), Fam220a(0.2), Pdp1(0.2), Ptpn23(0.19), Ssh3(0.19), Eya3(0.17), Ppm1a(0.17), Ppm1a(0.17), Ppm1a(0.1…
positive regulation of NF-kappaB transcription factor activity	0.00430684	0.149507	5.35605e-09	1.85781e-07	119	0.00116622	0.00176291	0.00949102	0.0114339	0.013739	Il1b(0.74), Irak3(0.72), Irak3(0.72), Clu(0.67), Sphk1(0.66), Trim15(0.57), Lrrfip2(0.43), Lrrfip2(0.43), Lrrfip2(0.43), Adam8(0.42), Rela(0.36), Rela(0.36), Cd84(0.34), Bcl10(0.32), Bcl10(0.32), Tirap(0.3), Tirap(0.3), Ager(0.28), Tlr4(0.28), Cflar(0.27), Il1rap(0.26), Tgfb1(0.26), Kras(0.23), Rhebl1(0.19), Myd88(0.18), Myd88(0.18), Myd88(0.18), Myd88(0.18), Ube2v1(0.18), Prkch(0.17), Itgb2(0.16…
protein polyubiquitination	0.00358527	0.154071	6.4351e-09	2.21042e-07	117	0.0120537	0.153763	0.000192165	0.000524833	0.00446212	Ube2t(0.74), Rnf125(0.67), Rnf180(0.43), Rnf19b(0.34), Rnf144b(0.34), Smurf1(0.29), Ube2g2(0.28), Ube2d1(0.26), Ube2d1(0.26), Arih2(0.24), Arih2(0.24), Cbfb(0.22), Ube2j2(0.21), Bfar(0.2), Rnf217(0.19), Ube2d3(0.16), Rnf145(0.16), Cdc34(0.16), Ube2e1(0.15), Rnf138(0.14), Rnf111(0.14), Rnf111(0.14), Rnf111(0.14), Axin1(0.13), Ube2b(0.13), Ube2b(0.13), Rc3h2(0.13), Peli1(0.11), Rnf122(0.11), Ube2s(…
cellular response to DNA damage stimulus	0.00234173	0.0959769	8.73806e-09	2.97262e-07	414	0.00116492	0.251267	0.0022583	0.000200066	0.00610255	Ube2t(0.74), Ube2t(0.74), Pmaip1(0.65), Ercc1(0.62), Cdkn1a(0.54), Cdkn1a(0.54), Btg2(0.48), Rad18(0.47), Rad18(0.47), Plk3(0.37), Plk3(0.37), Alkbh2(0.37), Tfpt(0.35), Npas2(0.34), Batf(0.33), Mcm10(0.3), Brsk1(0.3), Mapkapk2(0.29), Casp3(0.28), H2afx(0.28), Phf1(0.28), Ube2e2(0.28), Kin(0.26), Kin(0.26), Morf4l2(0.25), Aptx(0.22), Ap5s1(0.22), Cdk9(0.22), Bbc3(0.22), Lig4(0.22), Zc3h12a(0.21), …
microtubule cytoskeleton	0.00324286	0.138996	8.93596e-09	3.01099e-07	139	0.000206135	0.0248536	0.00135577	0.0448528	0.00815155	Id3(0.53), Rell1(0.38), Alkbh2(0.37), Mid1ip1(0.34), Fes(0.33), Fes(0.33), Clic4(0.32), Hoxc8(0.31), Ift43(0.31), Iqcb1(0.29), Rassf1(0.26), Gtf2f2(0.24), Sra1(0.23), Map1lc3a(0.22), Map1s(0.22), Mid1(0.2), Chp1(0.2), Katnb1(0.19), Cryab(0.18), Cdc42ep2(0.18), Sp4(0.17), Mark4(0.17), Taf1a(0.16), Spast(0.16), Spast(0.16), Cdc42ep4(0.16), Tacc2(0.15), Rbm39(0.15), Sept7(0.15), Map7d1(0.15), Dst(0.…
positive regulation of mast cell degranulation	0.00384079	0.509903	9.54605e-09	3.18622e-07	10	0.162557	0.000369655	0.00203536	0.00155161	0.00869749	Adora2b(0.67), Syk(0.6), Syk(0.6), Fgr(0.54), Fcer1g(0.45), Fcer1g(0.45), Il4ra(0.3), Pld2(0.18), Gab2(0.16), Gata2(-0.13),
transcriptional activator activity, RNA polymerase II core promoter proximal region sequence-specific binding	0.00188271	0.117996	1.07953e-08	3.56952e-07	204	0.102591	1.51077e-06	0.00256091	0.0446107	0.0185749	Fosb(0.86), Cebpd(0.85), Cebpd(0.85), Fos(0.81), Fos(0.81), Nr4a1(0.77), Nr4a1(0.77), Sox4(0.67), Sox4(0.67), Hmga1(0.59), Nr5a2(0.57), Fosl1(0.54), Cebpb(0.52), Cebpb(0.52), Txk(0.51), Arid3b(0.51), Egr1(0.48), Egr1(0.48), Junb(0.48), Jun(0.46), Atf4(0.45), Smad1(0.42), Sox9(0.41), Sox9(0.41), Pax8(0.4), Foxd1(0.37), Rela(0.36), Tead4(0.36), Hmga2(0.34), Batf(0.33), Batf(0.33), Cebpg(0.32), Nr4a…
protein import into nucleus	0.0044033	0.221099	1.2083e-08	3.95831e-07	53	0.000447261	0.0557995	0.00927218	0.00539215	0.00392523	Drd1(0.57), Txnip(0.37), Tmco6(0.29), Cry2(0.24), Kpna4(0.22), Fam53a(0.21), Kpna2(0.2), Rpain(0.19), Nup93(0.16), Ran(0.15), Rae1(0.15), Ppp3ca(0.14), Pttg1ip(0.14), Pttg1ip(0.14), Pom121(0.12), Cfl1(0.11), Nup88(0.11), Stat3(0.11), Ing1(0.11), Nup50(0.1), Nupl1(0.1), Phip(0.1), Tnpo2(0.1), Kpna1(0.09), Nup85(0.09), Kpna3(0.08), Ranbp1(0.08), Ipo7(0.08), Ipo9(0.07), Snupn(0.06), Kpnb1(0.04), Kpn…
small ribosomal subunit	0.00494479	0.332664	1.4099e-08	4.57635e-07	25	0.00982639	0.00016533	0.0476832	0.00346285	0.016827	Rps29(0.3), Rps6(0.28), Rpsa(0.15), Rps16(0.15), Rps28(0.13), Rps9(0.12), Rps2(0.11), Rps5(0.11), Rps20(0.11), Npm1(0.09), Rps3(0.09), Rack1(0.08), Rps18(0.08), Rps18(0.08), Rps24(0.08), Rps25(0.08), Mrps12(0.06), Rps15(0.05), Rps26(0.05), Rps21(0.03), Rps27a(0.01), Dap3(0), Rps4x(-0.02), Rps23(-0.05), Mrps2(-0.09),
autophagosome membrane	0.00432242	0.396946	1.67608e-08	5.39089e-07	17	0.0945153	0.0226076	0.000147273	0.0101865	0.000994236	Vmp1(0.48), Wipi1(0.33), Tecpr1(0.3), Tecpr1(0.3), Map1lc3a(0.22), Map1lc3a(0.22), Atg16l2(0.22), Map1lc3b(0.16), Map1lc3b(0.16), Gabarapl1(0.14), Sh3glb1(0.12), Atg16l1(0.1), Gabarap(0.07), Rpn2(0.04), Gabarapl2(0.02), Gabarapl2(0.02), Stx17(0.01),
chemokine receptor activity	0.00288902	0.505723	1.80335e-08	5.74797e-07	10	0.0117978	3.91571e-06	0.0618048	0.000484189	0.22784	Ccr7(2.19), Cxcr2(1.44), Cxcr2(1.44), Ackr2(0.5), Cxcr4(0.48), Ccr1(0.4), Ccr2(0.12), Ccr5(0.12), Ccrl2(0.08), Ackr4(-0.13),
leukocyte chemotaxis	0.00203185	0.425201	1.8678e-08	5.90024e-07	15	0.122215	3.76355e-06	0.0548763	1.65895e-05	0.180642	Cxcl2(1.86), S100a9(1.61), S1pr1(0.56), Il16(0.5), Ccr1(0.4), Ccr1(0.4), Pf4(0.34), Sbds(0.28), Cklf(0.1), Cnr2(0.05), Lyst(-0.03), Coro1a(-0.05), Gpr183(-0.18), Gpr183(-0.18), Ccl4(-0.87),
nuclear matrix	0.00498371	0.184245	2.07277e-08	6.48979e-07	77	0.00484479	0.00624167	0.00313395	0.000287157	0.158168	Alox5(0.77), Mbd1(0.57), Cebpb(0.52), Cebpb(0.52), Clic4(0.32), Enc1(0.31), Zfp703(0.29), Rnasel(0.28), Kin(0.26), Atxn1(0.17), Jak2(0.16), Cxxc1(0.15), Phf5a(0.14), Ahctf1(0.14), Pml(0.13), Tcerg1(0.13), Lmna(0.12), Psma6(0.12), Nsmf(0.12), Lmnb1(0.11), Lmnb1(0.11), Atn1(0.1), Ogg1(0.1), Maea(0.1), Pias4(0.1), Ppig(0.1), Cask(0.09), Trp53(0.08), Yy1(0.08), Nufip1(0.08), Nufip1(0.08), Ercc8(0.08)…
small GTPase mediated signal transduction	0.00472114	0.114051	2.10404e-08	6.52991e-07	202	0.165008	0.000361523	0.00484424	0.00256175	0.00591478	Rab44(2.47), Rasd1(0.82), Rasgrp4(0.66), Hmox1(0.61), Dock4(0.59), Ralgds(0.58), Arl11(0.56), Rasgef1b(0.47), Rhou(0.45), Rap2b(0.42), Rhob(0.39), Arf2(0.38), Rhoc(0.37), Arl4c(0.37), Rnd1(0.36), Rasl10b(0.34), Rnd3(0.33), Arl4d(0.33), Gem(0.31), Rhoj(0.31), Rac1(0.3), Rhog(0.3), Rab10(0.27), Arf5(0.26), Arl8a(0.26), Rap1b(0.26), Nras(0.25), Rras(0.25), Rras2(0.24), Kras(0.23), Rac2(0.23), Dock5(…
cytoplasmic translation	0.00429628	0.347804	2.16656e-08	6.66546e-07	21	0.000811097	0.000108169	0.0657423	0.00232581	0.145306	Rpl36(0.41), Rpl22l1(0.29), Rpl31(0.24), Rpl9(0.18), Rplp2(0.16), Rplp0(0.15), Rpl35a(0.12), Rpl6(0.11), Rpl8(0.11), Rplp1(0.11), Eif3j1(0.11), Rpl26(0.1), Rpl7(0.06), Rpl22(0.05), Eif4h(0.04), Ftsj1(0.04), Rpl7l1(0.04), Rpl29(0.01), Rpl15(-0.01), Eif4b(-0.01), Eif3j2(-0.03),
sphingomyelin biosynthetic process	0.00378635	0.462596	2.23815e-08	6.82635e-07	12	0.0101265	0.118924	0.00164242	0.000196854	0.0123074	Sgms2(0.31), Sgms2(0.31), Sgms2(0.31), Sgms2(0.31), Pemt(0.19), Sptlc2(0.16), Samd8(0.09), Sptlc1(0.06), Sptlc1(0.06), Sgms1(0.03), Sgms1(0.03), Sgms1(0.03),
regulation of alternative mRNA splicing, via spliceosome	0.00418586	0.24941	2.28929e-08	6.92267e-07	41	0.0127309	0.00107636	0.000309464	0.0159799	0.0879111	Celf4(0.39), Rbm15b(0.26), Rbm15b(0.26), Rnps1(0.21), Magoh(0.16), Rbm8a(0.16), Rbm8a(0.16), Malat1(0.16), Rbm25(0.15), Rbm7(0.14), Rbm11(0.14), Rbm11(0.14), Wtap(0.13), Wtap(0.13), Mbnl2(0.12), Mbnl2(0.12), Nsrp1(0.12), Dyrk1a(0.11), Ptbp1(0.1), Rbmxl1(0.1), Tra2b(0.1), Ddx5(0.07), Srsf6(0.07), Rbfox2(0.07), Rbfox2(0.07), Rbm5(0.06), Srek1(0.06), Srsf2(0.02), Thrap3(0.01), Uhmk1(0), Hnrnpl(-0.01…
positive regulation of apoptotic process	0.00516905	0.0920286	2.41425e-08	7.23866e-07	300	0.0232308	0.000433512	0.00149508	0.00742676	0.0698306	Pdcd1(1.59), Mmp9(1.42), Gal(1.34), Ptgs2(1.16), Il6(1.08), Dusp1(0.83), Wnt11(0.8), Nr4a1(0.77), Il1b(0.74), Igfbp3(0.67), Sox4(0.67), Trp53inp1(0.66), Pmaip1(0.65), Pmaip1(0.65), Hmox1(0.61), Adrb2(0.54), Fosl1(0.54), Id3(0.53), Nos3(0.53), Sav1(0.48), Gadd45b(0.47), Jun(0.46), Fam72a(0.45), Bmf(0.44), Bmf(0.44), Rassf2(0.42), Gadd45g(0.41), Cyr61(0.4), Tnfrsf12a(0.4), Rhob(0.39), Nupr1(0.39), …
transcription from RNA polymerase II promoter	0.0037199	0.149443	2.65691e-08	7.89928e-07	113	0.111425	0.000866186	7.40888e-05	0.0142592	0.0336654	Fosb(0.86), Fos(0.81), Egr1(0.48), Junb(0.48), Fosl2(0.46), Jun(0.46), Nfil3(0.4), Hsf2bp(0.4), Smad3(0.35), Jund(0.34), Chd5(0.32), Ell(0.24), Hif1a(0.24), Klf4(0.24), Gtf2f2(0.24), Taf4b(0.24), Prdm4(0.24), Elf3(0.23), Gata6(0.23), Arrb2(0.21), Polr2l(0.2), Xbp1(0.19), Zfp516(0.19), Myc(0.18), Hivep2(0.17), Klf13(0.17), Hivep3(0.16), Polr2d(0.15), Med13l(0.15), Srf(0.14), Ddx21(0.14), Ldb1(0.13…
mediator complex	0.00473599	0.221759	2.86876e-08	8.45807e-07	52	0.0182026	0.016903	1.10133e-05	0.0762762	0.0123499	Med11(0.19), Med11(0.19), Med28(0.15), Med13l(0.15), Med4(0.13), Med4(0.13), Med4(0.13), Med19(0.12), Med15(0.11), Med21(0.11), Med21(0.11), Med6(0.1), Med6(0.1), Med31(0.09), Med26(0.09), Med26(0.09), Med8(0.09), Med8(0.09), Med18(0.07), Med18(0.07), Med22(0.06), Med22(0.06), Med7(0.06), Med13(0.05), Med13(0.05), Med12(0.04), Med12(0.04), Med9(0.04), Med17(0.02), Med17(0.02), Med17(0.02), Thrap3…
maturation of SSU-rRNA from tricistronic rRNA transcript (SSU-rRNA, 5.8S rRNA, LSU-rRNA)	0.00483981	0.302902	3.49652e-08	1.02237e-06	28	1.94834e-05	0.0211838	0.0147859	0.0150477	0.0585106	Dcaf13(0.19), Rps16(0.15), Utp3(0.15), Diexf(0.14), Pwp2(0.13), Rps14(0.12), Ccdc59(0.11), Noc4l(0.11), Wdr3(0.1), Emg1(0.08), Rps24(0.08), Ngdn(0.08), Heatr1(0.08), Rps8(0.07), Rps19(0.06), Bms1(0.06), Utp18(0.06), Bysl(0.05), Tsr2(0.05), Tsr1(0.03), Krr1(0), Tbl3(0), Utp6(-0.02), Wdr46(-0.03), Rrp36(-0.05), Utp20(-0.06), Mrps11(-0.08), Mrps9(-0.12),
chromatin	0.00564307	0.148308	3.63311e-08	1.0536e-06	112	0.00687024	0.000447663	0.00132306	0.014885	0.141123	Mbd1(0.57), Kif22(0.53), Rad18(0.47), Plk2(0.42), Plk3(0.37), Hmga2(0.34), Chd5(0.32), Hr(0.3), Mis18a(0.3), H2afx(0.28), Jmjd1c(0.27), Klf4(0.24), Aptx(0.22), Sirt1(0.2), Fancc(0.19), Mbd2(0.16), Ran(0.15), Kdm3a(0.14), Ubr2(0.14), Ahctf1(0.14), Orc2(0.13), Rest(0.13), Ube2b(0.13), Rpa2(0.11), Fam111a(0.11), Fam178a(0.11), Bahd1(0.1), Creb1(0.09), Nfe2l2(0.09), Trim28(0.09), Esco1(0.09), Trp53(0…
NuA4 histone acetyltransferase complex	0.00675056	0.324664	3.88883e-08	1.11859e-06	23	0.0420628	0.0101639	0.000818234	0.00793394	0.0081109	Meaf6(0.26), Morf4l2(0.25), Yeats4(0.21), Kat5(0.17), Ruvbl2(0.16), Ruvbl2(0.16), Epc2(0.15), Epc1(0.13), Actb(0.11), Msl3(0.11), Morf4l1(0.05), Morf4l1(0.05), Dmap1(0.05), Dmap1(0.05), Mrgbp(0.04), Ep400(0.04), Brd8(0.04), Actl6a(0.03), Ruvbl1(0.02), Ruvbl1(0.02), Trrap(0), Ing3(-0.03), Msl3l2(-0.03),
transforming growth factor beta receptor signaling pathway	0.00382153	0.167363	4.26202e-08	1.21605e-06	88	0.0997593	2.96252e-06	0.0262665	0.0024477	0.0791089	Bmp8b(1), Fos(0.81), Gdnf(0.72), Jun(0.46), Cdh5(0.45), Cldn5(0.45), Bmp8a(0.44), Smad1(0.42), Smad3(0.35), Smad3(0.35), Smad3(0.35), Gcnt2(0.34), Gcnt2(0.34), Smurf1(0.29), Cited2(0.27), Tgfbr1(0.27), Tgfbr1(0.27), Tgfbr1(0.27), Tgfbr1(0.27), Tgfb1(0.26), Tgfb1(0.26), Src(0.22), Arrb2(0.21), Fermt2(0.21), Zyx(0.2), Zyx(0.2), Smad6(0.18), Dusp22(0.17), Dcp1a(0.16), Ptk2(0.14), Pxn(0.14), Pxn(0.14…
pre-autophagosomal structure membrane	0.00373803	0.419351	4.42621e-08	1.2528e-06	17	0.066114	0.151989	5.28136e-05	0.00429377	0.00174067	Wipi1(0.33), Wipi1(0.33), Wipi2(0.2), Wipi2(0.2), Atg12(0.17), Wdr45b(0.16), Wdr45(0.13), Atg14(0.13), Atg14(0.13), Ulk1(0.1), Ulk1(0.1), Atg5(0.07), Ulk2(0.06), Ulk2(0.06), Rb1cc1(0.04), Rab7(0.03), Rab1b(-0.04),
regulation of translation	0.00571072	0.152747	6.41069e-08	1.80008e-06	109	0.00265241	0.223993	0.00261492	0.000224146	0.0249735	S100a9(1.61), Piwil2(1.27), Eif4ebp3(0.65), Ppp1r15a(0.63), Rgs2(0.42), Ago4(0.37), Cpeb1(0.34), Eif4ebp1(0.32), Zfp36l1(0.31), Impact(0.24), Paip2(0.24), Pym1(0.24), Igf2bp2(0.23), Mknk2(0.21), Rbm3(0.2), Poldip3(0.19), Ctif(0.19), Tarbp2(0.18), Samd4(0.18), Eif4e2(0.17), Casc3(0.17), Magoh(0.16), Qk(0.15), Eif4e(0.14), Zfp385a(0.14), Elavl1(0.13), Ddx3x(0.12), Cnot9(0.12), Akt1(0.11), Cnot7(0.1…
integrin-mediated signaling pathway	0.00281872	0.197911	6.71855e-08	1.87167e-06	64	0.0126726	1.56222e-06	0.0929879	0.00038442	0.418637	Itgb3(0.82), Itgam(0.63), Syk(0.6), Ctgf(0.55), Fgr(0.54), Fgr(0.54), Apoa1(0.51), Txk(0.51), Sema7a(0.47), Sema7a(0.47), Tyrobp(0.47), Fcer1g(0.45), Itga5(0.33), Itga3(0.26), Tec(0.24), Tec(0.24), Itga2b(0.23), Itgb1(0.22), Src(0.22), Plek(0.21), Fermt2(0.21), Vav1(0.2), Zyx(0.2), Zyx(0.2), Itgav(0.19), Gab2(0.16), Itgb2(0.16), Ptk2(0.14), Ptk2(0.14), Pxn(0.14), Pxn(0.14), Nme2(0.13), Itgb2l(0.1…
positive regulation of proteasomal ubiquitin-dependent protein catabolic process	0.00669317	0.191205	7.04061e-08	1.94607e-06	65	0.00451987	0.00428185	0.000716769	0.0278523	0.076304	Clu(0.67), Rnf125(0.67), Trib1(0.55), Rnf180(0.43), Plk2(0.42), Nkd2(0.35), Rnf19b(0.34), Rnf144b(0.34), Csnk1e(0.33), Zfand2a(0.33), Gclc(0.28), Socs5(0.25), Arih2(0.24), Dab2(0.23), Csnk1d(0.2), Rnf217(0.19), Psen1(0.18), Trib3(0.18), Vcp(0.17), Psmd10(0.15), Rnf138(0.14), Axin1(0.13), Socs4(0.13), Nub1(0.12), Akt1(0.11), Mdm2(0.1), Chfr(0.09), Rack1(0.08), Arih1(0.08), Gsk3b(0.08), Cbfa2t3(0.0…
positive regulation of angiogenesis	0.00125624	0.175936	7.43919e-08	2.0403e-06	109	0.0149646	5.47611e-09	0.217785	0.000379239	0.612212	Pgf(1.53), Pgf(1.53), Cxcr2(1.44), Mmp9(1.42), Chil1(1.27), Hspb1(0.9), Itgb3(0.82), Serpine1(0.8), Serpine1(0.8), Il1b(0.74), Sphk1(0.66), Hmox1(0.61), Nos3(0.53), Angpt2(0.46), Btg1(0.44), Rhob(0.39), Sfrp2(0.38), Thbs1(0.36), Runx1(0.28), Rras(0.25), Hif1a(0.24), Gata6(0.23), Zc3h12a(0.21), Notch4(0.2), Sirt1(0.2), Anxa3(0.19), Flt1(0.19), Vegfc(0.19), Pdcl3(0.17), Hgf(0.16), Itgb2(0.16), Lgal…
nuclear-transcribed mRNA catabolic process, nonsense-mediated decay	0.00678388	0.263142	8.33849e-08	2.26935e-06	34	0.000622148	0.0497387	0.00368754	0.00503124	0.0579334	Pym1(0.24), Rnps1(0.21), Ctif(0.19), Pabpc1(0.18), Casc3(0.17), Magoh(0.16), Rbm8a(0.16), Rbm8a(0.16), Dcp1a(0.16), Etf1(0.16), Smg5(0.16), Upf3b(0.13), Dcp1b(0.1), Exosc10(0.09), Eif3e(0.07), Smg1(0.07), Upf1(0.06), Eif4a3(0.05), Pnrc2(0.04), Pnrc2(0.04), Magohb(0.04), Smg9(0.04), Smg8(0.04), Dcp2(0.03), Upf2(0.03), Parn(0.01), Uhmk1(0), Gspt1(-0.04), Smg7(-0.05), Ncbp1(-0.06), Ncbp2(-0.08), Smg…
U12-type spliceosomal complex	0.00793391	0.258536	8.42338e-08	2.27496e-06	35	0.0203907	0.00236275	0.0233922	0.00821706	0.0073662	Snrpd1(0.24), Snrpd1(0.24), Snrnp25(0.21), Snrnp35(0.18), Snrnp35(0.18), Rbm41(0.16), Ybx1(0.15), Zrsr2(0.14), Phf5a(0.14), Phf5a(0.14), Snrpb(0.13), Snrnp48(0.13), Sf3b6(0.11), Sf3b6(0.11), Rnpc3(0.1), Rnpc3(0.1), Pdcd7(0.09), Snrpf(0.09), Sf3b5(0.07), Sf3b5(0.07), Sf3b1(0.06), Sf3b1(0.06), Dhx15(0.05), Sf3b2(0.03), Sf3b2(0.03), Snrpd2(0.02), Zcrb1(-0.01), Zcrb1(-0.01), Sf3b3(-0.02), Sf3b4(-0.02…
G1/S transition of mitotic cell cycle	0.00829761	0.20421	9.01222e-08	2.41555e-06	56	0.0377668	0.00401297	0.00585883	0.0289505	0.00237099	Cdkn1a(0.54), Inhba(0.54), Gpr132(0.54), Rhou(0.45), Plk2(0.42), Camk2d(0.42), Rgcc(0.38), Plk3(0.37), Eif4ebp1(0.32), Rps6(0.28), Anp32b(0.23), Itgb1(0.22), Rcc1(0.22), Id4(0.2), Cdkn2d(0.19), E2f5(0.19), Lats2(0.19), Lats2(0.19), Iqgap3(0.19), Camk2g(0.16), Cacul1(0.16), Cdc25a(0.15), Phf8(0.15), Eif4e(0.14), Nfatc1(0.14), Ppp3ca(0.14), Cdkn1b(0.13), Cdkn1b(0.13), Cdk2(0.12), Rbbp8(0.11), Acvr1…
protein desumoylation	0.00759153	0.427192	9.17391e-08	2.4404e-06	13	0.00338192	0.0660355	0.000391944	0.0282316	0.0145638	Uspl1(0.21), Senp2(0.18), Senp2(0.18), Senp2(0.18), Senp5(0.1), Senp3(0.07), Senp6(0.07), Senp6(0.07), Fam76b(0.06), Fam76a(0.03), Senp1(0), Senp1(0), Senp1(0),
transcription factor binding	0.00461909	0.0866372	9.32998e-08	2.45778e-06	340	0.0418386	0.000296087	0.000250291	0.0637849	0.0686722	Fos(0.81), Nr4a1(0.77), Pim1(0.76), Hmga1(0.59), Trib1(0.55), Trib1(0.55), Trib1(0.55), Id3(0.53), Arid5a(0.53), Cebpb(0.52), Egr1(0.48), Junb(0.48), Jun(0.46), Jun(0.46), Atf4(0.45), Ppp1r13l(0.38), Rela(0.36), Smad3(0.35), Smad3(0.35), Ifi204(0.34), Jund(0.34), Bcl10(0.32), Cebpg(0.32), Cebpg(0.32), Hmga1-rs1(0.32), Eaf1(0.29), Bcl2l1(0.28), Nkx3-1(0.27), Nkx3-1(0.27), Nkx3-1(0.27), Per1(0.27),…
rRNA binding	0.00792261	0.235474	9.37818e-08	2.45778e-06	42	0.00110946	0.0246374	0.0151004	0.017229	0.00950959	Tlr13(0.54), Rpl11(0.3), Rnasel(0.28), Sbds(0.28), Rpl5(0.26), Nol12(0.25), Rpl12(0.24), Ddx28(0.23), Rpl9(0.18), Eri1(0.18), Ppan(0.17), Ddx21(0.14), Diexf(0.14), Rps9(0.12), Rps5(0.11), Rpl8(0.11), Imp3(0.11), Npm1(0.09), Kdm2b(0.09), Rpf2(0.09), Mterf4(0.09), Mterf4(0.09), Emg1(0.08), Rps18(0.08), Mterf3(0.07), Rps11(0.06), Mrps7(0.03), Rpf1(0.03), Mrpl16(0.03), Mrps6(0.03), Mrpl20(0.02), Mrps…
protein ubiquitination involved in ubiquitin-dependent protein catabolic process	0.00463447	0.141747	1.04001e-07	2.70556e-06	136	0.0090419	0.333212	2.14734e-05	0.0144925	0.00554139	Klhl21(0.39), Rnf19b(0.34), Rnf144b(0.34), Rnf144b(0.34), Smurf1(0.29), Smurf1(0.29), Smurf1(0.29), Klhl8(0.29), Klhl8(0.29), Abtb1(0.26), Arih2(0.24), Arih2(0.24), Rmnd5b(0.22), Abtb2(0.22), Gan(0.22), Klhl15(0.22), Bfar(0.2), Siah2(0.19), Btbd9(0.19), Rnf217(0.19), Rbbp6(0.18), Rbbp6(0.18), Rffl(0.18), Ube2z(0.18), Siah1a(0.17), Siah1a(0.17), Rnf11(0.17), Hace1(0.17), Hace1(0.17), Rnf145(0.16),…
exon-exon junction complex	0.00930847	0.297832	1.05631e-07	2.72791e-06	26	0.00651644	0.017533	0.00293982	0.0103036	0.0259906	Pym1(0.24), Poldip3(0.19), Casc3(0.17), Casc3(0.17), Magoh(0.16), Magoh(0.16), Rbm8a(0.16), Rbm8a(0.16), R3hcc1l(0.15), R3hcc1l(0.15), Upf3b(0.13), Pnn(0.08), Pnn(0.08), Upf3a(0.08), R3hcc1(0.07), Upf1(0.06), Eif4a3(0.05), Magohb(0.04), Magohb(0.04), Upf2(0.03), Srsf1(0.02), Thrap3(0.01), Uhmk1(0), Sap18(-0.07), Smg6(-0.11), Tdrd3(-0.11),
precatalytic spliceosome	0.00772164	0.304021	1.16941e-07	2.97823e-06	25	0.00118408	0.00225581	0.0965382	0.00207228	0.0651786	Snrpd1(0.24), Lsm2(0.24), Snrnp35(0.18), Rbmx2(0.16), Snrnp40(0.15), Phf5a(0.14), Nhp2l1(0.12), Bcas2(0.12), Sf3b6(0.11), Prpf38a(0.11), Snrpe(0.1), Aggf1(0.1), Prpf38b(0.09), Son(0.08), Plrg1(0.07), Sf3b5(0.07), Crnkl1(0.07), Snrnp70(0.03), Sf3b2(0.03), Snrpd2(0.02), Snrnp27(0), Lsm3(-0.03), Prpf31(-0.04), Snrpd3(-0.06), Snrpg(-0.24),
polysome	0.00922833	0.249254	1.17008e-07	2.97823e-06	37	0.0103634	0.0298182	0.0157933	0.00243763	0.00820985	Piwil2(1.27), Msi1(0.64), Rpl17(0.33), Rps6(0.28), Impact(0.24), Ybx3(0.21), Fxr2(0.2), Fxr1(0.14), Vbp1(0.12), Psma6(0.12), Calr(0.11), Ago2(0.11), Eif2ak4(0.1), Rps3(0.09), Mcrs1(0.08), Rps25(0.08), Naa30(0.07), Fus(0.07), Eef2(0.06), Rpl7(0.06), Atxn2(0.06), Eif4h(0.04), Drg1(0.03), Cpeb2(0.02), Eif4b(-0.01), Naa35(-0.01), Fmr1(-0.02), Fmr1(-0.02), Fmr1(-0.02), Rps4x(-0.02), Unk(-0.05), Unk(-0…
neuropeptide hormone activity	0.00500388	0.519563	1.19273e-07	3.0142e-06	10	0.0153967	0.0033394	0.000324933	0.00051387	0.50491	Gal(1.34), Gal(1.34), Vgf(1.21), Grp(0.7), Npy(0.61), Penk(0.36), Npff(0.05), Npff(0.05), Cck(-0.08), Cck(-0.08),
cytoplasmic stress granule	0.00917544	0.241338	1.24162e-07	3.1155e-06	40	0.0090038	0.0238474	0.00292519	0.00386264	0.0383345	Zfp36(0.41), Pabpc1(0.18), Rbpms(0.16), Grb7(0.15), Ybx1(0.15), Eif4e(0.14), Ddx3x(0.12), Atxn2l(0.1), Atxn2l(0.1), Eif2s1(0.09), Stau1(0.09), Rc3h1(0.09), Lsm14a(0.08), Pabpc4(0.08), Tial1(0.07), Tial1(0.07), Ddx6(0.06), Ddx6(0.06), Khsrp(0.06), Atxn2(0.06), Atxn2(0.06), Pum2(0.05), Pum2(0.05), Larp4b(0.05), Cirbp(0.04), Stau2(0.03), Pqbp1(0.03), G3bp1(0.01), Fmr1(-0.02), Ogfod1(-0.03), Ddx1(-0.…
keratinocyte differentiation	0.00864961	0.248754	1.36241e-07	3.39451e-06	37	0.00510835	0.000814298	0.00733308	0.0516299	0.0438238	Sprr2f(1.89), Sprr2f(1.89), Ptgs2(1.16), Sav1(0.48), Sav1(0.48), Epha2(0.43), Txnip(0.37), Clic4(0.32), Clic4(0.32), St14(0.29), Casp3(0.28), Sfn(0.26), Map2k1(0.22), Anxa1(0.2), Yap1(0.19), Yap1(0.19), Lats2(0.19), Irf6(0.13), Ctnnd1(0.09), Tsg101(0.07), Stk4(0.06), Ubn1(0.06), Rbpj(0.04), Lats1(0.03), Notch1(0.03), Med1(-0.01), Smarca4(-0.02), Tgm1(-0.07), Intu(-0.13), Dsp(-0.14), Sprr1a(-0.21)…
cytoplasmic vesicle	0.00812498	0.0735226	1.49327e-07	3.69455e-06	478	0.108137	0.00330574	0.00245456	0.0018779	0.0363228	Syt5(1.57), Mefv(1.34), Ngp(1.26), Vgf(1.21), Gch1(0.83), Tlr6(0.77), Il1b(0.74), Crisp1(0.72), Clu(0.67), Trp53inp1(0.66), Arc(0.61), Syk(0.6), Tmem198(0.6), Ap3b2(0.56), Apoa1(0.51), Cxcr4(0.48), Trim72(0.48), Ovgp1(0.47), Ctsl(0.43), Sema4c(0.42), Stx1a(0.42), Ap1s2(0.41), 3110043O21Rik(0.4), Hfe(0.39), Syt11(0.38), Emp2(0.37), Ptprn(0.37), Arrdc4(0.36), Creb3l4(0.36), Nkd2(0.35), Znrf1(0.35),…
positive regulation of translation	0.00841815	0.209582	1.60797e-07	3.95068e-06	52	0.00322994	0.00453921	0.00495713	0.00465074	0.180119	Piwil2(1.27), Il6(1.08), Sox4(0.67), Krt17(0.59), Thbs1(0.36), Cpeb1(0.34), Pym1(0.24), Rbm3(0.2), Poldip3(0.19), Tarbp2(0.18), Samd4(0.18), Eif6(0.16), Rps3a1(0.14), Elavl1(0.13), Elavl1(0.13), Elavl1(0.13), Upf3b(0.13), Ddx3x(0.12), Fam129a(0.11), Ptbp1(0.1), Ptk2b(0.1), Npm1(0.09), Upf3a(0.08), Itga2(0.07), Eef2(0.06), Ep300(0.06), Bcl3(0.05), Ddx39b(0.05), Eif4a3(0.05), Larp4b(0.05), Cirbp(0.…
protein complex binding	0.00832401	0.0835067	1.65542e-07	4.03923e-06	333	0.00905403	0.0307801	0.0123813	0.000178398	0.0858621	Mmp9(1.42), Mmp3(0.93), Nog(0.78), Tub(0.76), Pzp(0.75), Drd1(0.57), Adrb2(0.54), Cdkn1a(0.54), Cdk5rap1(0.54), Nfkbia(0.48), Rad18(0.47), Ctsl(0.43), Plk2(0.42), Bag3(0.41), Bag3(0.41), Kctd5(0.41), Kctd5(0.41), Rela(0.36), Rtn4(0.35), Arpc1b(0.32), Clic4(0.32), Lrrn3(0.31), Ppp2r2a(0.31), Casp3(0.28), Hspd1(0.28), Cflar(0.27), Tgfbr1(0.27), Bin1(0.26), Rap1b(0.26), Nras(0.25), Rras(0.25), Hif1a…
ligase activity	0.00750016	0.100875	1.68401e-07	4.08084e-06	332	0.021452	0.123232	0.0079973	0.0044524	0.000689132	Rnf125(0.67), Glul(0.58), Uchl1(0.55), Rimklb(0.55), Traip(0.51), Rad18(0.47), Birc3(0.44), Rnf180(0.43), Mkrn3(0.42), Acsl6(0.41), Mthfd1l(0.38), Znrf1(0.35), Rnf19b(0.34), Rnf144b(0.34), Acsl4(0.33), Trim39(0.33), Smurf1(0.29), Cblb(0.29), Gclc(0.28), Peli3(0.27), Traf3(0.25), Arih2(0.24), March3(0.24), Lig4(0.22), Rnf4(0.21), Asns(0.21), Ctps2(0.21), Mid1(0.2), Rnf103(0.2), Pias3(0.2), Siah2(0…
SNAP receptor activity	0.00968701	0.226113	1.78429e-07	4.29443e-06	45	0.018669	0.047336	0.0248589	0.00312316	0.00167977	Stx1a(0.42), Sec22b(0.31), Stx11(0.29), Bet1l(0.24), Bet1l(0.24), Stx3(0.21), Stx3(0.21), Vamp4(0.18), Vamp3(0.17), Snap29(0.15), Stx12(0.13), Stx5a(0.11), Stx5a(0.11), Ykt6(0.11), Ykt6(0.11), Sec22c(0.11), Stx6(0.1), Stx2(0.09), Vti1b(0.09), Gosr2(0.09), Stx4a(0.07), Stx4a(0.07), Sec22a(0.06), Vamp2(0.05), Stx8(0.05), Stx1b(0.05), Bnip1(0.05), Vamp8(0.02), Vamp8(0.02), Stx17(0.01), Stx17(0.01), …
binding of sperm to zona pellucida	0.00662529	0.366228	1.99736e-07	4.77476e-06	17	0.00256841	0.0143296	0.0728572	0.00482094	0.0105727	Hspa1b(1.3), Hspa1l(0.53), Spa17(0.23), B4galt1(0.21), B4galt1(0.21), Tcp1(0.17), Cct5(0.14), Cct7(0.14), Cct2(0.09), Cct3(0.07), Cct4(0.07), Pcsk4(0.07), Cct8(0.06), Fetub(0.03), Zpbp(-0.01), Arsa(-0.02), Adam1a(-0.26),
epidermal growth factor receptor signaling pathway	0.00637252	0.214185	2.09416e-07	4.97256e-06	51	0.0101105	0.0600179	0.000549665	0.00515227	0.0538229	Ereg(0.71), Sox9(0.41), Sox9(0.41), Hbegf(0.36), Hbegf(0.36), Fes(0.33), Cblb(0.29), Tgfb1(0.26), Socs5(0.25), Egfr(0.23), Egfr(0.23), Egfr(0.23), Egfr(0.23), Abl2(0.22), Erbb3(0.22), Src(0.22), Ptk2(0.14), Shc1(0.14), Tgfa(0.14), Tgfa(0.14), Btc(0.13), Btc(0.13), Arf4(0.12), Ptk2b(0.1), Ptk2b(0.1), Caml(0.09), Plcg1(0.09), Ptpn11(0.09), Iqgap1(0.09), Iqgap1(0.09), Garem1(0.09), Abl1(0.05), Sos1(…
transcription factor complex	0.00638975	0.1025	2.11099e-07	4.97912e-06	220	0.0647061	0.00381721	0.000217288	0.0162376	0.0706971	Fos(0.81), Nr4a1(0.77), Crem(0.54), Arid5a(0.53), Junb(0.48), Jun(0.46), Jun(0.46), Atf4(0.45), Smad1(0.42), Sox9(0.41), Sox9(0.41), Pax8(0.4), Rela(0.36), Tead4(0.36), Smad3(0.35), Jund(0.34), Npas2(0.34), Nr4a3(0.27), Kdm1a(0.27), Tle1(0.25), Hif1a(0.24), Klf4(0.24), Taf4b(0.24), Ankrd1(0.24), Arntl(0.23), Arntl(0.23), Gata6(0.23), Nrf1(0.23), Rel(0.23), Sra1(0.23), E2f3(0.22), Tcf7(0.21), Nfat…
mRNA export from nucleus	0.0103935	0.232999	2.23356e-07	5.21057e-06	42	0.0240289	0.0439277	0.000887641	0.00687459	0.0219763	Ddx19b(0.21), Rbmx2(0.16), Smg5(0.16), Nup88(0.11), Shfm1(0.11), Hhex(0.1), Thoc7(0.1), Thoc7(0.1), Sarnp(0.09), Thoc1(0.09), Nup85(0.09), Ddx39(0.08), Ddx39(0.08), Srsf10(0.07), Nup160(0.06), Nup160(0.06), Ddx39b(0.05), Ddx39b(0.05), BC005561(0.03), Ddx19a(0.02), Eif5a(0.02), Fyttd1(0), Nup107(0), Nup107(0), Nup133(0), Nup133(0), Nxf1(-0.01), Nup155(-0.02), Thoc2(-0.02), Thoc6(-0.02), Hnrnpa2b1(…
neuropeptide signaling pathway	0.00957769	0.353294	2.23857e-07	5.21057e-06	19	0.0508496	0.00182948	0.00114345	0.0127657	0.0721212	Tac1(1.42), Gal(1.34), Ltb4r1(1.25), Calca(0.84), Grp(0.7), Npy(0.61), Nmb(0.51), Scg5(0.4), Penk(0.36), Crcp(0.23), Hcrtr1(0.2), Npff(0.05), Rapgef2(-0.02), Rapgef2(-0.02), Galr3(-0.08), Cysltr1(-0.11), Sort1(-0.3), Kiss1r(-0.31), Mchr1(-0.66),
zona pellucida receptor complex	0.0106967	0.47093	2.33428e-07	5.39784e-06	10	0.00436934	0.0264958	0.039803	0.0131486	0.003103	Hspa1b(1.3), Hspa1l(0.53), Tcp1(0.17), Cct5(0.14), Cct7(0.14), Cct2(0.09), Cct3(0.07), Cct4(0.07), Cct8(0.06), Zpbp(-0.01),
negative regulation of inflammatory response	0.00468466	0.186175	2.91924e-07	6.70667e-06	75	0.048998	1.47621e-06	0.0805364	0.00533743	0.186977	Nlrp12(1.58), Acod1(1.34), Mefv(1.34), Ctla2a(0.85), Pglyrp1(0.68), Tnfaip8l2(0.62), Socs3(0.59), Tnfaip6(0.57), Adrb2(0.54), Apoa1(0.51), Siglece(0.44), Ier3(0.42), Zfp36(0.41), Nt5e(0.4), Smad3(0.35), Cd44(0.33), Ffar4(0.32), Ptpn2(0.3), Rabgef1(0.28), Socs5(0.25), Nfkb1(0.24), Tyro3(0.24), Tnfrsf1b(0.18), Hgf(0.16), Metrnl(0.16), Rora(0.15), Tnfaip3(0.15), Tnfaip3(0.15), Otulin(0.14), Ada(0.13…
nucleosomal DNA binding	0.00957439	0.280323	3.09103e-07	7.05553e-06	29	0.0300178	0.0219997	0.0249452	0.00258655	0.00627655	Rcc1(0.22), H3f3b(0.21), H3f3b(0.21), Mbd2(0.16), Mta2(0.13), Actb(0.11), Hnrnpc(0.11), Gatad2b(0.11), H3f3a(0.07), H3f3a(0.07), Smarcd2(0.07), Hdac1(0.07), Cenpa(0.05), Hdac2(0.05), H2afz(0.05), Hmgn3(0.05), Smarcc1(0.03), H2afy(0.03), H2afy(0.03), Actl6a(0.03), Hmgn1(0.02), Smarce1(0.02), Rbbp4(0), Mbd3(-0.01), Smarcb1(-0.01), Smarcc2(-0.01), Smarca4(-0.02), Hmgn5(-0.03), Chd4(-0.03),
hippo signaling	0.00924674	0.277706	3.17519e-07	7.20117e-06	29	0.00735085	0.172729	0.000847584	0.00419353	0.0239648	Sav1(0.48), Sav1(0.48), Tead4(0.36), Yap1(0.19), Lats2(0.19), Lats2(0.19), Stk3(0.19), Stk3(0.19), Mob1a(0.19), Wwtr1(0.17), Wtip(0.17), Limd1(0.09), Stk4(0.06), Stk4(0.06), Stk4(0.06), Mob1b(0.05), Ajuba(0.03), Lats1(0.03), Lats1(0.03), Amotl1(0.03), Tead3(0.01), Tead1(-0.01), Tead1(-0.01), Amotl2(-0.03), Amot(-0.08), Pja2(-0.08), Tead2(-0.19), Dchs1(-0.25), Fat4(-0.52),
ribosomal small subunit biogenesis	0.00957676	0.34919	3.37586e-07	7.60752e-06	18	0.00205766	0.00125271	0.0277339	0.0230651	0.0953768	Rps6(0.28), Rps6(0.28), Nob1(0.21), Rps17(0.2), Rps16(0.15), Rps7(0.15), Rps7(0.15), Rps28(0.13), Nom1(0.12), Npm1(0.09), Npm1(0.09), Surf6(0.09), Rps24(0.08), Rps19(0.06), Utp11l(0.06), Rps15(0.05), Ltv1(0.02), Rrp36(-0.05),
blood microparticle	0.00475937	0.204109	3.4948e-07	7.8257e-06	81	0.456621	0.000396311	0.150701	0.00173104	0.000119657	Fgb(1.88), Hspa1a(1.78), Hba-a1(1.48), Fgg(1.46), Hba-a2(1.37), Fga(1.06), Kng1(0.89), Kng1(0.89), Clu(0.67), Serpina3m(0.57), Hspa1l(0.53), Apoa1(0.51), Apoa1(0.51), Angptl4(0.42), Clic1(0.41), Jchain(0.38), Trf(0.37), Alb(0.34), Serpina3n(0.32), F13a1(0.32), Cp(0.26), Tgfb1(0.26), Msn(0.25), Slc2a1(0.25), Itga2b(0.23), Sdcbp(0.2), Ywhaz(0.17), Actb(0.11), Pfn1(0.1), Itih2(0.07), Stom(0.04), Pro…
unfolded protein binding	0.0107405	0.17662	3.68751e-07	8.2053e-06	70	0.00122116	0.0242845	0.0290885	0.0686618	0.00359069	Hspa1a(1.78), Tbce(0.94), Dnajb13(0.8), Hsp90aa1(0.65), Dnajb1(0.58), Dnaja4(0.57), Hspa1l(0.53), Hspe1(0.43), Hsp90ab1(0.4), Scg5(0.4), Hspa5(0.3), Dnajb2(0.29), Dnajb5(0.24), Ptges3(0.19), Cryab(0.18), Grpel2(0.18), Tcp1(0.17), Dnajb6(0.15), Cct5(0.14), Cct7(0.14), Calr(0.11), Dnaja1(0.11), Cct2(0.09), Npm1(0.09), Aip(0.08), Syvn1(0.08), Syvn1(0.08), Serpinh1(0.07), Cct3(0.07), Cct4(0.07), Srsf…
positive regulation of transcription elongation from RNA polymerase II promoter	0.0119405	0.32099	3.86331e-07	8.54274e-06	21	0.0153725	0.043403	0.00152237	0.00688454	0.0399115	Ell2(0.4), Ell(0.24), Gtf2f2(0.24), Gtf2f2(0.24), Dab2(0.23), Map2k1(0.22), Brd4(0.21), Ikzf1(0.19), Rtf1(0.12), Gtf2f1(0.1), Eapp(0.09), Paf1(0.05), Leo1(0.05), Leo1(0.05), Supt6(0.03), Supt6(0.03), Ctr9(0.01), Cdc73(0.01), Tceb1(0), Wdr61(-0.05), Cbx7(-0.06),
SNARE complex	0.0108091	0.196694	4.0413e-07	8.88082e-06	60	0.0169094	0.0824382	0.0237708	0.00801334	0.00087254	Stx1a(0.42), Sec22b(0.31), Stx11(0.29), Stx3(0.21), Stx3(0.21), Vamp4(0.18), Vamp3(0.17), Vamp3(0.17), Snap29(0.15), Snap29(0.15), Stx12(0.13), Stx12(0.13), Stx5a(0.11), Stx5a(0.11), Ykt6(0.11), Ykt6(0.11), Sec22c(0.11), Stx6(0.1), Stx6(0.1), Stx2(0.09), Vti1b(0.09), Vti1b(0.09), Gosr2(0.09), Stxbp5(0.08), Stx4a(0.07), Stx4a(0.07), Snx4(0.06), Sec22a(0.06), Vamp2(0.05), Vamp2(0.05), Stx8(0.05), S…
nuclear chromatin	0.00852791	0.116277	4.1433e-07	9.04875e-06	182	0.00663907	0.0231548	0.00407402	0.00145053	0.176765	Mbd1(0.57), Cebpb(0.52), Mxd1(0.52), Junb(0.48), Jun(0.46), Jun(0.46), Rela(0.36), Smad3(0.35), Jund(0.34), Enc1(0.31), H2afx(0.28), Cited2(0.27), Kdm1a(0.27), Kdm1a(0.27), Hist3h2a(0.27), Nr1d1(0.25), H2afj(0.25), Klf4(0.24), Aptx(0.22), Rcc1(0.22), Brd4(0.21), Sirt1(0.2), Ezh2(0.18), Ezh2(0.18), Hira(0.18), Hira(0.18), Kat5(0.17), Mbd2(0.16), Calcoco1(0.16), Tcf4(0.15), Etv3(0.15), Polr3d(0.15)…
protein stabilization	0.00765138	0.13188	4.2093e-07	9.13652e-06	131	0.000808749	0.123076	0.00107291	0.00692829	0.120834	Pim1(0.76), Usp13(0.71), Clu(0.67), Sox4(0.67), Sox4(0.67), Apoa1(0.51), Sav1(0.48), Rassf2(0.42), Bag3(0.41), Smad3(0.35), Hspd1(0.28), Rab3gap1(0.26), Atp1b3(0.23), Flot2(0.21), Gpihbp1(0.21), Chp1(0.2), Tbrg1(0.19), Tbrg1(0.19), Stk3(0.19), Tcp1(0.17), Tnip2(0.17), Pfn2(0.16), Golga7(0.16), Naa16(0.16), Gtpbp4(0.16), Cct5(0.14), Cct7(0.14), Taf9(0.14), Ube2b(0.13), Pdcd10(0.13), Stx12(0.13), M…
leukocyte migration involved in inflammatory response	0.00698265	0.463356	4.55256e-07	9.82131e-06	11	0.0143522	0.000203575	0.0929056	0.000321796	0.301299	S100a9(1.61), S100a8(1.6), Ppbp(1.29), Itgam(0.63), Adam8(0.42), Cd24a(0.21), Itgb2(0.16), Aoc3(-0.1), Ccl2(-0.17), Jam3(-0.19), Cx3cl1(-0.32),
RNA polymerase II core promoter proximal region sequence-specific DNA binding	0.00351762	0.100006	4.67612e-07	1.00267e-05	262	0.0477313	0.000133753	0.00399086	0.00108789	0.524978	Fosb(0.86), Atf3(0.85), Cebpd(0.85), Cebpd(0.85), Fos(0.81), Nr5a2(0.57), Fosl1(0.54), Fosl1(0.54), Cebpb(0.52), Mxd1(0.52), Txk(0.51), Arid3b(0.51), Tgif1(0.49), Junb(0.48), Fosl2(0.46), Jun(0.46), Atf4(0.45), Prdm1(0.43), Smad1(0.42), Pax8(0.4), Foxd1(0.37), Rela(0.36), Tead4(0.36), Smad3(0.35), Ifi204(0.34), Jund(0.34), Batf(0.33), Cebpg(0.32), Nr4a2(0.32), Grhl1(0.3), Nfkb2(0.27), Nr4a3(0.27)…
protein heterodimerization activity	0.00690626	0.0727181	4.76184e-07	1.0149e-05	426	0.0743071	2.57722e-05	0.0347735	0.00398521	0.159051	Syt5(1.57), Pgf(1.53), Inhbb(1.02), Chrnb4(0.95), Atf3(0.85), Cebpd(0.85), Sgtb(0.85), Fos(0.81), Nr4a1(0.77), Nr4a1(0.77), Tlr6(0.77), Sdcbp2(0.77), Irak3(0.72), Sox4(0.67), Itgam(0.63), Krt4(0.6), Drd1(0.57), Inhba(0.54), Cebpb(0.52), Cebpb(0.52), Bdkrb2(0.5), Nefm(0.5), Jun(0.46), Ttr(0.46), Atf4(0.45), Smad1(0.42), Stx1a(0.42), Sox9(0.41), Unc13a(0.41), Alox5ap(0.36), Rela(0.36), H2-Q10(0.35)…
protein transporter activity	0.0107154	0.185993	5.06165e-07	1.07234e-05	65	0.000980641	0.0708209	0.0517043	0.00366903	0.0198308	Ramp3(0.52), Ap1s2(0.41), Tmco6(0.29), Ap3s1(0.26), Kpna4(0.22), Kpna2(0.2), Xpo6(0.18), Calcr(0.15), Cog2(0.1), Cog2(0.1), Tnpo2(0.1), Kpna1(0.09), Ap2b1(0.09), Kpna3(0.08), Chmp7(0.08), Ipo7(0.08), Uso1(0.07), Ipo11(0.07), Ipo9(0.07), Ipo9(0.07), Calcrl(0.06), Snupn(0.06), Cog3(0.06), Cog3(0.06), Ipo5(0.05), Rap1a(0.05), Cox18(0.05), Ap1s1(0.04), Kpnb1(0.04), Ap2a1(0.03), Ranbp6(0.03), Tnpo1(0.…
proteasome regulatory particle	0.00939961	0.472528	5.27503e-07	1.1109e-05	10	0.0119933	0.0287208	0.000117587	0.113138	0.030792	Psmd11(0.25), Psmd8(0.17), Psmd7(0.13), Psmd3(0.13), Psmd2(0.11), Psmd6(0.11), Psmd13(0.1), Psmc1(0.09), Psmd12(0.07), Psmc5(0.04),
PML body	0.00818737	0.171342	6.32996e-07	1.32517e-05	78	0.058584	0.04244	4.9739e-05	0.0557136	0.0196848	Ankrd2(1), Isg20(0.32), Sqstm1(0.23), Cdk9(0.22), Rnf4(0.21), Rnf4(0.21), Zbtb16(0.21), Mapk7(0.2), Elf4(0.2), Sirt1(0.2), Rpain(0.19), Daxx(0.18), Daxx(0.18), Hipk1(0.18), Ube2i(0.18), Senp2(0.18), Smc5(0.18), Zmym2(0.17), Dapk3(0.14), Nsmce2(0.14), Klhl20(0.14), Klhl20(0.14), Max(0.13), Pml(0.13), Pml(0.13), Pml(0.13), Trim16(0.13), Lrch4(0.13), Lrch4(0.13), Morc3(0.13), Morc3(0.13), Agap3(0.12…
COP9 signalosome	0.0108891	0.24206	6.38817e-07	1.32949e-05	39	0.00246342	0.00389778	0.0822111	0.00600843	0.0728136	Hspa1l(0.53), Hsp90ab1(0.4), Hspa5(0.3), Grb2(0.19), Grb2(0.19), Flot1(0.15), Cops7b(0.12), Cops7b(0.12), Myh9(0.1), Cops8(0.1), Cops8(0.1), Cops8(0.1), Plcg1(0.09), Gps1(0.08), Gps1(0.08), Basp1(0.07), Cops5(0.06), Cops5(0.06), Dock7(0.06), Dynll1(0.04), Cops2(0.03), Amotl1(0.03), Cops6(0.02), Cops6(0.02), Epb41l2(-0.02), Cops3(-0.02), Cops3(-0.02), Cops4(-0.02), Cops4(-0.02), Cops7a(-0.05), Cop…
nuclear localization sequence binding	0.00888493	0.293796	7.0555e-07	1.45979e-05	27	0.000204941	0.208185	0.000834251	0.0311218	0.0762249	Nfkbia(0.48), Kpna4(0.22), Kpna2(0.2), Kpna2(0.2), Pom121(0.12), Nupl1(0.1), Nupl1(0.1), Tnpo2(0.1), Kpna1(0.09), Kpna1(0.09), Kpna3(0.08), Ipo5(0.05), Kpnb1(0.04), Nup153(0.03), Nup153(0.03), Ranbp6(0.03), Lbr(0.02), Tnpo1(0.02), Nup98(0), Nup98(0), Brap(-0.01), Tnpo3(-0.05), Nup214(-0.07), Nup214(-0.07), Ipo4(-0.1), Ipo13(-0.11), Kpna6(-0.16),
positive regulation of interleukin-6 production	0.00193515	0.225234	7.44948e-07	1.53234e-05	58	0.141694	1.4293e-06	0.110219	0.000266214	0.375033	Il1f9(1.34), Il6(1.08), Il1f6(0.97), Il1b(0.74), Il1b(0.74), Adora2b(0.67), Fcer1g(0.45), Fcer1g(0.45), Mapk13(0.31), Hspd1(0.28), Il6ra(0.28), Tlr4(0.28), Tlr4(0.28), Tlr4(0.28), Tlr4(0.28), Card9(0.24), Tnfsf9(0.23), Myd88(0.18), Akirin2(0.17), P2rx7(0.16), Zfp64(0.16), Zfp64(0.16), Ripk2(0.14), Il1rl2(0.13), Ccr5(0.12), Tlr3(0.07), Tlr3(0.07), Tlr3(0.07), Tbc1d23(0.06), Zcchc11(0.02), Hmgb1(0.…
positive regulation of ERK1 and ERK2 cascade	0.00568902	0.127129	7.8612e-07	1.60768e-05	150	0.0771704	7.94808e-06	0.21078	0.000418294	0.196873	Fgb(1.88), Fgg(1.46), Chil1(1.27), Il6(1.08), Fga(1.06), Ccl20(0.91), Ptpn22(0.83), Ptpn22(0.83), Itgb3(0.82), Il1b(0.74), Ccl22(0.73), Ccl6(0.68), Glipr2(0.68), Ctgf(0.55), Bmper(0.54), Sema7a(0.47), Sema7a(0.47), Jun(0.46), Fgf21(0.43), Camk2d(0.42), Ccr1(0.4), Gcnt2(0.34), Gcnt2(0.34), Cd44(0.33), Cd44(0.33), Ffar4(0.32), Pdgfa(0.31), Pdgfa(0.31), Spry2(0.3), Tirap(0.3), Tlr4(0.28), Cflar(0.27…
cell-cell signaling	0.00777849	0.207821	8.53356e-07	1.73516e-05	56	0.0556797	5.71056e-05	0.103408	0.00067982	0.216338	Nfe2(1.62), Tac1(1.42), Wnt11(0.8), Edn1(0.76), Ereg(0.71), Ntf5(0.63), Npy(0.61), Ctgf(0.55), Adrb2(0.54), Ccr1(0.4), Cyr61(0.4), Fzd2(0.27), Gja1(0.23), Gja1(0.23), Tnfsf9(0.23), Wnt7a(0.22), Gja4(0.19), Fjx1(0.16), Stab1(0.14), Ccr5(0.12), Il7(0.09), Fgfr2(0.08), Cxcl14(0.07), Gjc1(0.06), Gjc1(0.06), Ccl5(0.03), Panx1(0.03), Panx1(0.03), Dhh(0), Tnfsf18(0), Lnpep(-0.01), Dll1(-0.03), Aimp1(-0.…
positive regulation of interleukin-6 biosynthetic process	0.0110081	0.457408	8.76149e-07	1.77132e-05	10	0.13664	0.00597096	0.0287307	0.000485668	0.0300071	Tlr6(0.77), Il1b(0.74), Ereg(0.71), Tirap(0.3), Tirap(0.3), Tirap(0.3), Tlr4(0.28), Traf6(-0.04), Ptafr(-0.05), Tlr1(-0.27),
ubiquitin binding	0.010093	0.168468	9.30085e-07	1.86968e-05	75	0.0047307	0.188477	0.00168022	0.016966	0.0165989	Hspb1(0.9), Usp13(0.71), Uchl1(0.55), Uchl1(0.55), Cxcr4(0.48), Uchl3(0.39), Smad3(0.35), Bcl10(0.32), Optn(0.25), Cry2(0.24), Sqstm1(0.23), Ubap1(0.22), Ubap1(0.22), Ubtd1(0.21), Nsfl1c(0.19), Nsfl1c(0.19), Nploc4(0.18), Nploc4(0.18), Terf1(0.16), Tnfaip3(0.15), Rae1(0.15), Cry1(0.14), Dnajc2(0.14), Faap20(0.14), Ubxn7(0.12), Bub3(0.09), Hgs(0.09), Tsg101(0.07), Sharpin(0.07), D17Wsu92e(0.07), S…
translation initiation factor binding	0.0155649	0.292871	9.49816e-07	1.89856e-05	24	0.0147844	0.0249626	0.0221091	0.00978456	0.0150308	Gch1(0.83), Syt11(0.38), Eif4ebp1(0.32), Zpr1(0.17), Zpr1(0.17), Polr2d(0.15), Rps3a1(0.14), Ddx3x(0.12), Eif3f(0.09), Rps24(0.08), Eif3b(0.08), Rps19(0.06), Trim32(0.06), Larp1(0.05), Celf1(0.04), Eif3c(0.04), Polr2g(0.03), Eif3m(-0.01), Eif2b5(-0.01), Fmr1(-0.02), Eif2b4(-0.03), Tbl2(-0.05), Gle1(-0.06), Cacna1c(-0.07),
ubiquitin ligase complex	0.0100719	0.163553	1.17074e-06	2.32701e-05	87	0.00727084	0.205952	0.000417689	0.0442216	0.0122589	Hspa1a(1.78), Rnf19b(0.34), Rnf144b(0.34), Ube2d1(0.26), Arih2(0.24), Ube2j2(0.21), Med11(0.19), Rnf217(0.19), Asb3(0.18), Ube2v1(0.18), Dcun1d5(0.18), Rnf11(0.17), Rnf11(0.17), Traf7(0.17), Ube2e1(0.15), Rnf2(0.14), Rnf2(0.14), Ubr2(0.14), Mphosph8(0.13), Fbxo11(0.12), Dnaja1(0.11), Med21(0.11), Dcun1d3(0.11), Ikbkg(0.1), Med6(0.1), Smurf2(0.09), Med31(0.09), Arih1(0.08), Syvn1(0.08), Topors(0.0…
RNA polymerase II distal enhancer sequence-specific DNA binding	0.0138534	0.194721	1.25809e-06	2.48667e-05	54	0.0888111	0.00423882	0.00262217	0.0064286	0.102957	Nr5a2(0.57), Arid3b(0.51), Jun(0.46), Rela(0.36), Nfkb1(0.24), Rel(0.23), H3f3b(0.21), Zbtb16(0.21), Ikzf1(0.19), Tfap2a(0.18), Rxrb(0.17), Mbd2(0.16), Ruvbl2(0.16), Nfatc1(0.14), Spi1(0.13), Mta2(0.13), Actb(0.11), Hnrnpc(0.11), Gatad2b(0.11), Bach1(0.1), Creb1(0.09), Nfe2l2(0.09), Tal1(0.09), Gzf1(0.09), Nfe2l1(0.08), H3f3a(0.07), Smarcd2(0.07), Hdac1(0.07), Bach2(0.06), Hdac2(0.05), H2afz(0.05…
methylated histone binding	0.0126546	0.205321	1.29403e-06	2.5435e-05	49	0.0662187	0.0237915	0.00574634	0.017044	0.0086589	Sgf29(0.3), Phf1(0.28), Phf1(0.28), Chd1(0.21), Cdyl2(0.19), Ing2(0.17), Ing5(0.16), Phf8(0.15), Lrwd1(0.14), Mtf2(0.13), Mtf2(0.13), Mphosph8(0.13), Mphosph8(0.13), Phf2(0.12), Wdr5(0.12), Msl3(0.11), Ing1(0.11), Ing4(0.11), Kat8(0.1), Kdm7a(0.1), Spin1(0.08), Cbx2(0.04), Cbx4(0.03), Rrp8(0.03), Rrp8(0.03), Chd8(-0.01), Rbbp5(-0.01), Fmr1(-0.02), Msh6(-0.02), Atrx(-0.02), Glyr1(-0.02), L3mbtl2(-…
positive regulation of leukocyte migration	0.0106026	0.360526	1.31277e-06	2.562e-05	16	0.0778907	4.00501e-05	0.0296498	0.0234049	0.102425	Mmp9(1.42), Itgb3(0.82), Sele(0.3), Selp(0.25), Selp(0.25), Itga2b(0.23), Kitl(0.15), Pecam1(0.13), Trp53(0.08), Itga2(0.07), Tnfrsf18(0.02), Tnfsf18(0), Tlr2(-0.01), Itga4(-0.07), Aoc3(-0.1), Ccl2(-0.17),
CXCR chemokine receptor binding	0.0121842	0.458291	1.31793e-06	2.562e-05	10	0.0569265	0.00238698	0.0178796	0.000886899	0.19074	Cxcl3(2.56), Cxcl2(1.86), Cxcl5(1.43), Ppbp(1.29), Cxcl1(0.59), Pf4(0.34), Cxcl10(-0.05), Itch(-0.15), Cxcl12(-0.81), Cxcl12(-0.81),
stem cell population maintenance	0.0158978	0.187469	1.4202e-06	2.74334e-05	58	0.00513577	0.0475343	0.00571526	0.0246949	0.0410098	Lif(0.73), Lif(0.73), Eomes(0.57), Klf4(0.24), Tpt1(0.19), Setd1a(0.17), Med28(0.15), Nkap(0.15), Pelo(0.15), Eif4e(0.14), Eif4e(0.14), Mtf2(0.13), Rtf1(0.12), Rtf1(0.12), Bmpr1a(0.11), Stat3(0.11), Med15(0.11), Med21(0.11), Med6(0.1), Lsm1(0.08), Mettl3(0.07), Mettl14(0.07), Ddx6(0.06), Med7(0.06), Paf1(0.05), Setd6(0.05), Nipbl(0.05), Dicer1(0.05), Leo1(0.05), Leo1(0.05), Med12(0.04), Smc1a(0.0…
signal transducer activity	0.00411593	0.113997	1.42672e-06	2.74334e-05	270	0.197738	7.61626e-08	0.160266	0.00339868	0.252125	Ccr7(2.19), Fpr2(1.55), Fpr1(1.5), Cxcr2(1.44), Ltb4r1(1.25), Celsr3(1.19), P2ry13(1.08), Sstr4(1.04), P2ry10(1), Hcar2(0.68), Adora2b(0.67), Hmox1(0.61), Drd1(0.57), S1pr1(0.56), Adrb2(0.54), Gpr132(0.54), Gpr35(0.53), Bdkrb2(0.5), Ackr2(0.5), Gprc5a(0.5), Rgs7(0.49), Cxcr4(0.48), Adgrg2(0.48), S1pr4(0.44), Gprc5b(0.44), Adgrv1(0.44), Acap1(0.43), Gng4(0.42), Plk2(0.42), Unc13a(0.41), Ccr1(0.4),…
Golgi membrane	0.0147815	0.133399	1.526e-06	2.91837e-05	120	0.0474565	0.0242667	0.0369588	0.0201205	0.00156189	Srgn(0.75), Glipr2(0.68), Abcb1b(0.39), Hpd(0.37), Sec22b(0.31), Rac1(0.3), Mall(0.3), Chst7(0.26), Zdhhc13(0.25), Bet1l(0.24), Bet1l(0.24), Cyp2e1(0.23), Pmepa1(0.22), Whamm(0.21), Cln3(0.2), Chp1(0.2), Unc50(0.17), Hace1(0.17), Ica1(0.16), Golga7(0.16), Actr3(0.14), Chst1(0.14), Tnfrsf1a(0.13), Cdc42(0.12), Acbd3(0.12), Stx5a(0.11), Stx5a(0.11), Rgp1(0.11), Mapk8ip3(0.1), Fut10(0.1), Stk24(0.1)…
lamellipodium	0.00620909	0.140707	1.56414e-06	2.97522e-05	142	0.0119675	0.0144123	0.0578808	3.25434e-06	0.540222	Trpv2(0.62), Sh3bgrl3(0.39), Rac1(0.3), Rac1(0.3), Arap3(0.28), Dbn1(0.27), Cdh1(0.26), Myo9b(0.26), Myo9b(0.26), Twf2(0.25), Arpc5(0.24), Rac2(0.23), Arpc3(0.23), Abl2(0.22), Flot2(0.21), Stx3(0.21), Pdpn(0.2), Hax1(0.2), Fscn1(0.18), Fscn1(0.18), Pld2(0.18), Vasp(0.17), Pip5k1a(0.16), Tmod3(0.16), Flot1(0.15), Kitl(0.15), Capzb(0.14), Arhgap31(0.14), Ptk2(0.14), Pxn(0.14), Pxn(0.14), Dysf(0.14)…
cell cycle arrest	0.0156137	0.173542	1.58978e-06	3.00784e-05	67	0.125579	0.0090576	0.0096822	0.00814805	0.0151522	Slfn1(1.27), Trp53inp1(0.66), Cdkn1a(0.54), Cdkn1a(0.54), Cdkn1a(0.54), Inhba(0.54), Thbs1(0.36), Smad3(0.35), Pmp22(0.28), Cdkn2b(0.27), Tgfb1(0.26), Rassf1(0.26), Cdkn1c(0.22), Map2k1(0.22), Cdkn2d(0.19), Tbrg1(0.19), Tbrg1(0.19), Gadd45a(0.18), Myc(0.18), Cdkn1b(0.13), Cdkn1b(0.13), Pml(0.13), Irf6(0.13), Ppm1g(0.12), Ern1(0.12), Calr(0.11), Ing4(0.11), Zbtb49(0.11), Hras(0.1), Eif2ak4(0.1), S…
in utero embryonic development	0.0130087	0.0919535	1.61187e-06	3.03339e-05	243	0.0831234	0.0059029	0.00024064	0.0327584	0.119748	Hba-a1(1.48), Hba-a2(1.37), Nog(0.78), Edn1(0.76), Maff(0.75), Fosl1(0.54), Nos3(0.53), Junb(0.48), Prdm1(0.43), Klf2(0.38), Tead4(0.36), Smad3(0.35), Zfand5(0.33), Bcl2l1(0.28), Runx1(0.28), Cited2(0.27), Tgfbr1(0.27), Kdm1a(0.27), Cdh1(0.26), Dnmt3l(0.26), Chd7(0.26), Chd7(0.26), Ell(0.24), Sp2(0.24), Dab2(0.23), Gata6(0.23), Gja1(0.23), Itgb1(0.22), Lig4(0.22), Ybx3(0.21), Insl3(0.19), Foxc1(0…
cytoplasmic ribonucleoprotein granule	0.0164499	0.30837	1.75317e-06	3.28185e-05	21	0.0106346	0.025338	0.0172172	0.075944	0.00512636	Tuba1a(0.45), Rac1(0.3), Rps6(0.28), Rock2(0.23), Pabpc1(0.18), Smn1(0.17), Tubb5(0.17), Rplp0(0.15), Ddx3x(0.12), Actb(0.11), Rpl6(0.11), Stau1(0.09), Iqgap1(0.09), Ncl(0.06), Ddx3y(0.05), Hnrnpu(0.05), Fmr1(-0.02), Fmr1(-0.02), Rpl28(-0.06), Mapt(-0.3), Dhx9(-0.31),
cytokine receptor activity	0.00895915	0.237622	1.76334e-06	3.28352e-05	41	0.0779605	4.9947e-05	0.0164747	0.0040229	0.390841	Csf3r(1.06), Csf2rb(0.8), Il21r(0.73), Il21r(0.73), Il7r(0.56), Il31ra(0.54), Il20rb(0.47), Il13ra1(0.34), Cd44(0.33), Cd44(0.33), Il4ra(0.3), Il6ra(0.28), Il3ra(0.2), Osmr(0.2), Ifngr2(0.19), Csf2ra(0.18), Ifngr1(0.17), Ifnlr1(0.16), Ifnlr1(0.16), Il1rl2(0.13), Il2rb(0.11), Flt3(0.04), Flt3(0.04), F3(0.02), Il6st(0.01), Csf2rb2(-0.03), Il11ra1(-0.03), Cd74(-0.05), Cd74(-0.05), Il2rg(-0.05), Il12…
histone H2A acetylation	0.0166588	0.341852	1.87934e-06	3.48121e-05	17	0.0466373	0.0117696	0.00187463	0.0450275	0.0356409	Meaf6(0.26), Morf4l2(0.25), Yeats4(0.21), Ruvbl2(0.16), Epc1(0.13), Msl3(0.11), Morf4l1(0.05), Morf4l1(0.05), Dmap1(0.05), Dmap1(0.05), Ep400(0.04), Brd8(0.04), Actl6a(0.03), Ruvbl1(0.02), Trrap(0), Ing3(-0.03), Msl3l2(-0.03),
nucleocytoplasmic transporter activity	0.0113166	0.314724	1.92931e-06	3.55516e-05	22	0.0122188	0.106075	0.0055415	0.00936507	0.026233	Nup54(0.17), Nup54(0.17), Rbm22(0.15), Pom121(0.12), Nupl1(0.1), Nupl1(0.1), Nup35(0.07), Nup160(0.06), Nup160(0.06), Nup153(0.03), Nup153(0.03), Nup107(0), Nup107(0), Nup133(0), Nup133(0), Nup133(0), Nup98(0), Nxf1(-0.01), Tpr(-0.06), Tpr(-0.06), Nup214(-0.07), Xpo1(-0.12),
MLL1 complex	0.0156736	0.262347	2.0799e-06	3.79752e-05	30	0.0121698	0.0513988	0.00268395	0.0102497	0.0952983	Las1l(0.28), Ruvbl2(0.16), Rnf2(0.14), Taf9(0.14), Max(0.13), Wdr5(0.12), Taf7(0.11), Kansl1(0.11), Tex10(0.11), Tex10(0.11), Kat8(0.1), Mga(0.09), Mcrs1(0.08), Phf20(0.08), Senp3(0.07), Taf4(0.06), Ash2l(0.04), Ino80c(0.04), Hcfc1(0.02), Ruvbl1(0.02), Pelp1(0.01), E2f6(-0.01), Chd8(-0.01), Rbbp5(-0.01), Taf1(-0.01), 0610010K14Rik(-0.02), 0610010K14Rik(-0.02), Prpf31(-0.04), Kmt2a(-0.07), Taf6(-0…
NF-kappaB binding	0.0156727	0.257136	2.0823e-06	3.79752e-05	30	0.0199105	0.00742606	0.0356164	0.0111862	0.0433504	Hspa1a(1.78), Nfkbia(0.48), Rela(0.36), Bcl10(0.32), Taf4b(0.24), Brms1(0.13), Psma6(0.12), Ppard(0.11), Hif1an(0.11), Commd7(0.1), Npm1(0.09), Gsk3b(0.08), Rnf25(0.08), Hdac1(0.07), Ep300(0.06), Anxa4(0.05), Apex1(0.05), Hdac2(0.05), Setd6(0.05), Setd6(0.05), Commd6(0.05), Hdac3(0.03), Akap8(0.03), Mtdh(0.03), Faf1(0.01), Notch2(0), Nfkbid(-0.04), Ankrd42(-0.05), Cdk5rap3(-0.1), Trp53bp2(-0.13),
protein kinase binding	0.0135665	0.071168	2.15324e-06	3.88713e-05	412	0.0218673	0.00770766	0.0054938	0.00835262	0.183614	Cdk5r1(1.12), Syn1(1), Hspb1(0.9), Hsp90aa1(0.65), Ppp1r15a(0.63), Syk(0.6), Camk2n2(0.55), Fgr(0.54), Fgr(0.54), Gprc5b(0.44), Gprc5b(0.44), Smad1(0.42), Zfp36(0.41), Hsp90ab1(0.4), Dok7(0.39), Dok7(0.39), Rgcc(0.38), Rgcc(0.38), Emp2(0.37), Musk(0.36), Rela(0.36), Rela(0.36), Smad3(0.35), Tfpt(0.35), Cd44(0.33), Ceacam2(0.33), Ccnl1(0.33), Tsacc(0.33), Irs2(0.33), Bcl10(0.32), Ptpn2(0.3), Rac1(…
RNA processing	0.0154879	0.197964	2.15341e-06	3.88713e-05	66	0.00131954	0.176808	0.00590098	0.0193194	0.0395081	Ccnl1(0.33), Snrpd1(0.24), Dhx40(0.17), Ddx54(0.15), Exosc8(0.14), Rcl1(0.13), Mrm1(0.12), Lsm4(0.1), Prpf39(0.1), Cherp(0.09), Exosc10(0.09), Trub2(0.09), Cstf3(0.09), Larp7(0.08), Dkc1(0.08), Wbp11(0.07), Crnkl1(0.07), Dhx33(0.07), Sart3(0.06), Rtca(0.06), Fbl(0.05), Trmt2a(0.05), Exosc1(0.05), Dicer1(0.05), Dicer1(0.05), Adar(0.03), Prpf6(0.03), Dhx57(0.03), Sfswap(0.03), Ssb(0.02), Dhx30(0.02…
cell proliferation	0.0101795	0.106578	2.20169e-06	3.95411e-05	180	0.00770073	0.00115101	0.0978334	0.000468313	0.423593	Pim1(0.76), Gdnf(0.72), Usp13(0.71), Rasgrp4(0.66), Ucn2(0.64), Ercc1(0.62), Glul(0.58), Uchl1(0.55), Ddit4(0.5), Ncf1(0.48), Hmga2(0.34), Irs2(0.33), Zfp36l1(0.31), Rac1(0.3), Txnrd1(0.3), Mcm10(0.3), Mvp(0.3), Bcl2l1(0.28), Sbds(0.28), Cited2(0.27), Kdm1a(0.27), Tgfb1(0.26), Tgfb1(0.26), Rap1b(0.26), Egfr(0.23), Sra1(0.23), Src(0.22), Map2k1(0.22), Lig4(0.22), H3f3b(0.21), Uspl1(0.21), Pdpn(0.2…
response to endoplasmic reticulum stress	0.00834694	0.166551	2.21599e-06	3.95968e-05	76	0.044893	0.169928	0.0115423	0.00591387	0.00237621	Thbs4(0.74), Ppp1r15a(0.63), Ppp1r15a(0.63), Cebpb(0.52), Atf4(0.45), Atf4(0.45), Thbs1(0.36), Sdf2l1(0.31), Hspa5(0.3), Ppp2cb(0.26), Bbc3(0.22), Pdia6(0.18), Trib3(0.18), Flot1(0.15), Col4a3bp(0.15), Ptpn1(0.14), Ern1(0.12), Map3k5(0.11), Map3k5(0.11), Tmx4(0.11), Fam129a(0.11), Ppp1r15b(0.11), Eif2ak4(0.1), Eif2s1(0.09), Eif2s1(0.09), Nfe2l2(0.09), Erp44(0.09), Erp44(0.09), Nrbf2(0.09), Uba5(0…
regulation of cell morphogenesis	0.0178702	0.26934	2.4193e-06	4.30125e-05	27	0.0103447	0.0306962	0.0231537	0.00604996	0.0622081	Arc(0.61), Ago4(0.37), Fmnl2(0.31), Rac1(0.3), Efna5(0.26), Camsap1(0.2), Fitm2(0.18), Zmym2(0.17), Wtip(0.17), Capzb(0.14), Zranb1(0.14), Cfl1(0.11), Larp4(0.11), Phip(0.1), Rac3(0.05), Pdzd8(0.04), Sparc(0.03), Qrich1(0.01), Zmym6(0.01), Zmym6(0.01), Zmym3(0), Zmym3(0), Bcl9l(-0.03), Strip1(-0.07), Zmym4(-0.08), Zmym4(-0.08), Sh3d19(-0.13),
cell adhesion molecule binding	0.0122242	0.181835	2.44291e-06	4.3215e-05	62	0.0510177	0.00282764	0.0484344	0.00108112	0.138166	Fgb(1.88), Fgg(1.46), Sell(1.11), Fga(1.06), Amica1(1.02), Itgb3(0.82), Pvr(0.5), Cldn7(0.43), Adam8(0.42), Adam8(0.42), Nectin2(0.35), Nectin2(0.35), Itga5(0.33), Cdh1(0.26), Cxadr(0.26), Msn(0.25), Ezr(0.23), Itgb1(0.22), Src(0.22), Nectin4(0.22), Sdcbp(0.2), Cpe(0.18), Pkp3(0.17), Cadm3(0.17), Nlgn2(0.17), Itgb2(0.16), Cadm1(0.15), Cadm1(0.15), Cd200(0.12), Caml(0.09), Ctnnd1(0.09), Ptpn11(0.0…
platelet aggregation	0.00887692	0.264509	2.47656e-06	4.35924e-05	33	0.0415311	0.000663229	0.0131594	0.000847142	0.536822	Fgb(1.88), Fgg(1.46), Fga(1.06), Hspb1(0.9), Itgb3(0.82), Slc7a11(0.55), Rap2b(0.42), Clic1(0.41), Tyro3(0.24), Itga2b(0.23), Plek(0.21), Plek(0.21), P2ry12(0.2), Bloc1s4(0.15), Actb(0.11), Vcl(0.11), Myh9(0.1), Fermt3(0.08), Fermt3(0.08), Flna(0.08), Stxbp1(0.05), Gnas(0.03), Pip5k1c(0.03), Tln1(0.02), Fibp(0.02), Csrp1(0.01), Stxbp3(0), Metap1(0), Ptpn6(-0.04), Myl12b(-0.14), Actg1(-0.27), Myl9…
leukocyte cell-cell adhesion	0.00371279	0.292646	2.78844e-06	4.88391e-05	29	0.0104657	6.35106e-07	0.328116	0.00808315	0.439597	Itgam(0.63), Syk(0.6), Nt5e(0.4), Itga5(0.33), Sele(0.3), Olr1(0.26), Selp(0.25), Selp(0.25), Ptprc(0.24), Itgb1(0.22), Cd24a(0.21), Itgb2(0.16), Tnip1(0.14), Fermt3(0.08), Fermt3(0.08), Rock1(0.06), Ccl5(0.03), Itga4(-0.07), Itga4(-0.07), Icam1(-0.08), Icam1(-0.08), Umod(-0.12), Vcam1(-0.15), Vcam1(-0.15), Itgal(-0.21), Itgal(-0.21), Itgal(-0.21), Apoa4(-0.33), L1cam(-0.33),
leukocyte migration	0.0126848	0.292092	2.98567e-06	5.2036e-05	23	0.0367179	6.32098e-05	0.0278945	0.0424682	0.193597	Fpr2(1.55), Fpr1(1.5), Mmp9(1.42), Amica1(1.02), Il1b(0.74), Pde4b(0.64), Pde4d(0.28), Selp(0.25), Selp(0.25), B4galt1(0.21), C5ar2(0.16), F2rl1(0.09), Rock1(0.06), Ccl25(0.04), Foxj1(0), Podxl(0), Aimp1(-0.03), Aimp1(-0.03), Itga6(-0.07), Itga6(-0.07), Tnf(-0.26), Itgb7(-0.32), Cd34(-0.4),
histone H3-K9 demethylation	0.0192009	0.360474	3.06223e-06	5.31087e-05	15	0.0878346	0.0103888	0.00645061	0.014483	0.0379525	Hr(0.3), Kdm1a(0.27), Kdm1a(0.27), Jmjd1c(0.27), Phf8(0.15), Kdm3a(0.14), Kdm3a(0.14), Phf2(0.12), Kdm7a(0.1), Kdm7a(0.1), Kdm4b(0), Kdm3b(0), Kdm4c(-0.02), Kdm4c(-0.02), Hsf4(-0.35),
TBP-class protein binding	0.0184932	0.272681	3.10451e-06	5.35794e-05	26	0.0166145	0.0443055	0.00195463	0.0216687	0.0857813	Ercc1(0.62), Rnf4(0.21), Naca(0.14), Gtf2a1(0.13), Gtf2b(0.12), Gtf2a2(0.12), Gtf2a2(0.12), Dr1(0.1), Psmc2(0.1), Psmc2(0.1), Psmc1(0.09), Psmc1(0.09), Psmc4(0.08), Psmc6(0.07), Psmc3(0.05), Psmc5(0.04), Psmc5(0.04), Brf1(0.02), Cand1(-0.01), Taf1(-0.01), Taf1(-0.01), Hnrnpf(-0.02), Yeats2(-0.02), Cand2(-0.09), Cand2(-0.09), Thra(-0.21),
DNA repair	0.00894021	0.108299	3.15706e-06	5.42217e-05	304	0.00109138	0.453749	0.0221394	0.00235397	0.0188091	Hspa1a(1.78), Ube2t(0.74), Ercc1(0.62), Ercc1(0.62), Kif22(0.53), Rad18(0.47), Alkbh2(0.37), Tfpt(0.35), H2afx(0.28), H2afx(0.28), Kin(0.26), Morf4l2(0.25), Eepd1(0.25), Aptx(0.22), Ap5s1(0.22), Cdk9(0.22), Lig4(0.22), Fancc(0.19), Xrcc2(0.19), Ndnl2(0.19), Rpain(0.19), Emsy(0.19), Smug1(0.18), Smug1(0.18), Smc5(0.18), Eya3(0.17), Vcp(0.17), Ruvbl2(0.16), Xpa(0.16), Ube2d3(0.16), Cinp(0.16), Sfr1…
protein N-terminus binding	0.0184638	0.13906	3.3739e-06	5.7666e-05	100	0.0188718	0.0388844	0.0340829	0.00210567	0.0619703	Nfe2(1.62), Glrx(0.9), Clu(0.67), Stx1a(0.42), Unc13a(0.41), Alox5ap(0.36), Rela(0.36), Zwint(0.31), Sgf29(0.3), Tgfb1(0.26), Csnk2a2(0.23), Ywhaq(0.22), Map2k1(0.22), Aptx(0.22), Hax1(0.2), Sdcbp(0.2), Pias3(0.2), Daxx(0.18), Tarbp2(0.18), Exoc2(0.18), Arf6(0.16), Calm2(0.16), Calm1(0.15), Id1(0.15), Ppp1cc(0.14), Tbl1xr1(0.14), Suv39h1(0.13), Pdcd10(0.13), Rpa2(0.11), Stx5a(0.11), Thap7(0.11), …
poly(A)-specific ribonuclease activity	0.0159123	0.337062	3.60026e-06	6.12391e-05	17	0.0227789	0.0371164	0.004858	0.107803	0.00763262	Noct(0.24), Noct(0.24), Pan2(0.2), Pan2(0.2), Pan3(0.17), Pan3(0.17), Cnot7(0.11), Cnot7(0.11), Cnot2(0.09), Pde12(0.09), Cnot8(0.08), Cnot8(0.08), Toe1(0.04), Cnot6(0.02), Parn(0.01), Cnot6l(-0.07), Cnot1(-0.11),
ATP-dependent chromatin remodeling	0.0186829	0.282522	3.62607e-06	6.1383e-05	24	0.0153325	0.0364707	0.0801981	0.00121193	0.0504693	Cecr2(0.32), Mbd2(0.16), Smarca5(0.15), Mta2(0.13), Actb(0.11), Hnrnpc(0.11), Gatad2b(0.11), Smarcd2(0.07), Hdac1(0.07), Hdac2(0.05), Smarcc1(0.03), Actl6a(0.03), Smarce1(0.02), Smarcad1(0.01), Rbbp4(0), Mbd3(-0.01), Smarcb1(-0.01), Smarcb1(-0.01), Chd8(-0.01), Smarcc2(-0.01), Smarca4(-0.02), Arid1a(-0.03), Chd4(-0.03), Smarca1(-0.3),
response to stress	0.0169035	0.252112	4.60134e-06	7.75217e-05	30	0.0131329	0.0062204	0.00474086	0.215808	0.0347663	Hsp90aa1(0.65), Ucn2(0.64), Bdkrb2(0.5), Gadd45b(0.47), Gadd45g(0.41), Hsp90ab1(0.4), Map4k4(0.34), Mapk13(0.31), Mapkapk2(0.29), Rcan1(0.27), Rcan1(0.27), Ahsa2(0.22), Map2k7(0.2), Gadd45a(0.18), Npm1(0.09), Ahsa1(0.09), Smg1(0.07), Ahr(0.06), Hsp90b1(0.05), Oma1(0.04), Mapk11(0.03), Pink1(0.02), Ppp3cb(0), Taok2(0), Mink1(-0.06), Mtor(-0.07), Trap1(-0.11), Prkaa2(-0.17), Rcan2(-0.29), Rcan2(-0.…
nuclear membrane	0.0203008	0.113321	4.6917e-06	7.86694e-05	158	0.00276533	0.03557	0.0123506	0.0559181	0.0677415	Gch1(0.83), Alox5(0.77), Nr4a1(0.77), Slc16a3(0.51), Tmc8(0.4), Alox5ap(0.36), Tfpt(0.35), Cep170(0.27), Hn1(0.26), Emd(0.23), Cep70(0.22), Rcc1(0.22), Sun2(0.22), Elf4(0.2), Dtx2(0.19), Psen1(0.18), Rangap1(0.17), Tmem57(0.17), Spast(0.16), Gtpbp4(0.16), Nup93(0.16), Zc3hc1(0.16), Dgkh(0.16), Ybx1(0.15), Phf8(0.15), Dnajc2(0.14), Lemd2(0.14), Lemd2(0.14), Ahctf1(0.14), Epc1(0.13), Pml(0.13), Wta…
cellular response to cytokine stimulus	0.0137554	0.272998	4.7404e-06	7.91111e-05	27	0.189364	0.000369695	0.0413642	0.0206444	0.0305774	Ccr7(2.19), Nlrp12(1.58), Csf3(0.53), Cxcr4(0.48), Cxcr4(0.48), Nfkbia(0.48), Il17ra(0.28), Nfkb1(0.24), Plscr1(0.24), Cdk9(0.22), Hax1(0.2), Socs1(0.13), Hcls1(0.12), Stat3(0.11), Ddias(0.06), Flt3(0.04), Flt3(0.04), Foxf1(0.03), Nos2(0.03), Jak3(-0.04), Akap6(-0.17), Csf1r(-0.2), Pid1(-0.2), Stat5a(-0.23), Gata3(-0.26), Mme(-0.28), Stat1(-0.34),
Ino80 complex	0.0189272	0.342277	5.10848e-06	8.48535e-05	17	0.00659787	0.013532	0.0410883	0.0108591	0.126265	Tfpt(0.35), Ruvbl2(0.16), Ruvbl2(0.16), Ino80b(0.11), Ino80e(0.09), Ino80e(0.09), Yy1(0.08), Mcrs1(0.08), Actr5(0.08), Ino80(0.04), Ino80c(0.04), Actl6a(0.03), Ruvbl1(0.02), Ruvbl1(0.02), Uchl5(0.01), Nfrkb(-0.03), Actr8(-0.04),
cullin deneddylation	0.0191086	0.361691	5.17588e-06	8.55714e-05	15	0.00575143	0.0250678	0.123566	0.0182042	0.0167997	Cops7b(0.12), Cops7b(0.12), Cops8(0.1), Gps1(0.08), Gps1(0.08), Cops5(0.06), Cops2(0.03), Cops6(0.02), Cops6(0.02), Cops3(-0.02), Cops3(-0.02), Cops4(-0.02), Cops4(-0.02), Cops7a(-0.05), Cops7a(-0.05),
positive regulation of actin filament polymerization	0.0153667	0.197217	5.25289e-06	8.64405e-05	49	0.054371	0.000306899	0.0179729	0.0215792	0.240658	Cdc42ep3(0.56), Csf3(0.53), Rac1(0.3), Gm14137(0.3), Cdc42ep5(0.22), Cdc42ep5(0.22), Baiap2l1(0.22), Baiap2l1(0.22), Grb2(0.19), Lmod1(0.19), Cdc42ep2(0.18), Cdc42ep2(0.18), Vasp(0.17), Arpc2(0.17), Arf6(0.16), Pfn2(0.16), Pfn2(0.16), Cdc42ep4(0.16), Cdc42ep1(0.15), Actr3(0.14), Pfn1(0.1), Ptk2b(0.1), Cttn(0.08), Nck2(0.08), Nphs1(0.06), Nckap1l(0.06), Nckap1l(0.06), Mlst8(0.05), Evl(0.04), Ricto…
histone demethylase activity (H3-K9 specific)	0.0201829	0.394765	5.47694e-06	8.97102e-05	12	0.131076	0.0274999	0.00273651	0.00521771	0.0729851	Hr(0.3), Kdm1a(0.27), Jmjd1c(0.27), Phf8(0.15), Kdm3a(0.14), Phf2(0.12), Phf2(0.12), Kdm7a(0.1), Kdm7a(0.1), Kdm4b(0), Kdm3b(0), Kdm4c(-0.02),
behavioral response to pain	0.0160076	0.43522	5.66314e-06	9.23327e-05	10	0.068522	0.000866865	0.0424238	0.00441634	0.196077	Osm(1), Thbs4(0.74), Thbs4(0.74), Cacna1a(0.49), Thbs1(0.36), Runx1(0.28), Vwa1(0.07), Git2(0.06), Tspo(0.04), Kcnip3(-0.47),
positive regulation of axon extension	0.015126	0.228282	6.94264e-06	0.000112675	38	0.00360343	0.0533901	0.00748464	0.0222344	0.16491	Islr2(1.08), Trpv2(0.62), Sema7a(0.47), Sema7a(0.47), Tnfrsf12a(0.4), Dbn1(0.27), Ngf(0.25), Ngf(0.25), Twf2(0.25), Map1b(0.22), Map1b(0.22), Rab11a(0.18), Eif2b2(0.16), Srf(0.14), Srf(0.14), Anapc2(0.13), Limk1(0.08), Gsk3b(0.08), Cdh4(0.07), Pafah1b1(0.07), Rpl4(0.07), Shtn1(0.06), Ep300(0.06), Eif4g2(0.03), Fxn(0.03), Ndel1(0.03), Apoe(-0.01), Golga4(-0.03), Nrg1(-0.05), Adnp(-0.06), Ntn1(-0.1…
ATG1/ULK1 kinase complex	0.0140233	0.472907	7.31497e-06	0.000118175	11	0.242241	0.201606	0.000235005	0.00726043	0.0133758	Atg13(0.16), Atg13(0.16), Atg13(0.16), Ulk1(0.1), Ulk1(0.1), Ulk1(0.1), Rb1cc1(0.04), Rb1cc1(0.04), Rb1cc1(0.04), Sesn2(-0.11), Tbc1d5(-0.15),
GTP binding	0.017649	0.0768917	7.35169e-06	0.000118228	321	0.086721	0.00361547	0.194923	0.0395568	0.00123873	Rab44(2.47), Gch1(0.83), Gch1(0.83), Rasd1(0.82), Tuba8(0.69), Hcar2(0.68), Hsp90aa1(0.65), Arl11(0.56), Mb21d1(0.47), Tuba1a(0.45), Rhou(0.45), Rap2b(0.42), Hsp90ab1(0.4), Rhob(0.39), Tubb6(0.39), Arf2(0.38), Rhoc(0.37), Arl4c(0.37), Gtpbp6(0.36), Rnd1(0.36), Rasl10b(0.34), Rnd3(0.33), Arl4d(0.33), Tubb2a(0.32), Gem(0.31), Rhoj(0.31), Rac1(0.3), Rac1(0.3), Rhog(0.3), Tuba1c(0.28), Rab10(0.27), A…
protein neddylation	0.0193194	0.325594	7.42186e-06	0.000118817	18	0.180016	0.0336107	0.00346862	0.054564	0.00418294	Nae1(0.2), Nae1(0.2), Ube2f(0.18), Ube2f(0.18), Dcun1d5(0.18), Dcun1d3(0.11), Uba3(0.05), Rnf7(0.04), Rnf7(0.04), Dcun1d1(0.03), Nedd8(0.02), Nedd8(0.02), Nedd8(0.02), Rbx1(0.01), Ube2m(0), Ube2m(0), Dcun1d2(-0.06), Dcun1d4(-0.32),
double-stranded RNA binding	0.00541306	0.174087	7.58118e-06	0.000120821	76	0.0450515	0.000105481	0.0544785	0.0199591	0.268922	Hspa1a(1.78), Oas1g(0.86), Oas3(0.74), Oas3(0.74), Tlr13(0.54), Hsp90ab1(0.4), Ago4(0.37), Yrdc(0.34), Actn1(0.3), Hspd1(0.28), Oasl1(0.27), Oasl1(0.27), Eif4a1(0.26), Msn(0.25), Aptx(0.22), Prkrip1(0.19), Tlr8(0.19), Tlr8(0.19), Tarbp2(0.18), Ddx21(0.14), Tubb4b(0.14), Elavl1(0.13), Vim(0.12), Strbp(0.11), Ago2(0.11), Rftn1(0.1), Stau1(0.09), Lsm14a(0.08), Ilf2(0.08), Sidt2(0.08), Tlr3(0.07), Tl…
transcription corepressor activity	0.0132572	0.121781	7.72345e-06	0.000122536	157	0.0839305	0.00149634	0.00259605	0.00551743	0.507694	Hsbp1l1(0.54), Lmcd1(0.37), Cdyl(0.31), Hr(0.3), Hr(0.3), Sap30(0.28), Cited2(0.27), Tle1(0.25), Ankrd1(0.24), Zfp281(0.22), Jazf1(0.22), Sirt1(0.2), Sirt1(0.2), Kctd1(0.2), Sin3b(0.19), Tle4(0.19), Tle4(0.19), Yap1(0.19), Rybp(0.19), Daxx(0.18), Daxx(0.18), Hipk1(0.18), Trib3(0.18), Wwtr1(0.17), Wtip(0.17), Gps2(0.16), Tcf4(0.15), Ddx54(0.15), Tbl1xr1(0.14), Tbl1xr1(0.14), Asxl1(0.14), Aebp1(0.1…
positive regulation of inflammatory response	0.00505171	0.219482	7.83922e-06	0.000123818	53	0.031866	5.8145e-06	0.460695	0.000346265	0.528799	S100a9(1.61), S100a8(1.6), Serpine1(0.8), Ccl6(0.68), Il1rl1(0.52), Gprc5b(0.44), Adam8(0.42), Ager(0.28), Hspd1(0.28), Il17ra(0.28), Tlr4(0.28), Ctss(0.27), Egfr(0.23), Cd47(0.23), Jak2(0.16), Ace(0.14), Tnip1(0.14), Tnfrsf1a(0.13), Ccr2(0.12), Ccr5(0.12), Ccl9(0.1), Itga2(0.07), Tgm2(0.07), Tlr3(0.07), Pde2a(0.07), Ets1(0.06), Fabp4(0.03), Ccl5(0.03), Ednra(0.02), Gpsm3(0.01), Tnfsf18(0), Tlr2(…
spliceosomal snRNP assembly	0.0150051	0.2817	8.41659e-06	0.000132346	25	0.000219886	0.091678	0.245402	0.00228843	0.105214	Snrpd1(0.24), Snrpd1(0.24), Gemin8(0.19), Gemin8(0.19), Rbm22(0.15), Strap(0.14), Gemin2(0.14), Gemin7(0.14), Snrpb(0.13), Sart1(0.11), Snrpe(0.1), Lsm4(0.1), Snrpf(0.09), Sart3(0.06), Prmt5(0.03), Ddx20(0.03), Gemin5(0.03), Snrpd2(0.02), Snrpd2(0.02), Snrpc(0.01), Gemin6(-0.01), Prmt7(-0.01), Clns1a(-0.05), Snrpd3(-0.06), Snrpd3(-0.06),
negative regulation of cytokine secretion	0.0218263	0.426882	8.46608e-06	0.000132535	10	0.0830183	0.00171812	0.0454789	0.00919032	0.103769	Nlrp12(1.58), Il6(1.08), Srgn(0.75), Lrrc32(0.55), Rgcc(0.38), Ffar4(0.32), Lgr4(0.03), Ptger4(-0.04), Cx3cl1(-0.32), Cidea(-2.04),
T cell activation	0.0131657	0.272094	8.61112e-06	0.000134212	27	0.0165324	0.00213558	0.0179385	0.0138892	0.373139	Treml2(1.22), Il6(1.08), Cd48(0.41), Smad3(0.35), Cblb(0.29), Hspd1(0.28), Hspd1(0.28), Hspd1(0.28), Was(0.27), Tgfb1(0.26), Tgfb1(0.26), Vav1(0.2), Itgav(0.19), Nlrc3(0.17), Ada(0.13), Ifnar1(0.12), Azi2(0.09), Azi2(0.09), Icosl(0.05), Nck1(0.02), Dlg1(-0.01), Ddost(-0.05), Cd276(-0.07), Nedd4(-0.11), Satb1(-0.17), Dock2(-0.22), Dpp4(-0.29),
nuclear body	0.0193068	0.2102	8.70951e-06	0.00013515	43	0.188043	0.00866831	0.0228644	0.00919031	0.0235738	Hr(0.3), Arntl(0.23), Zbtb16(0.21), Myc(0.18), Ube2i(0.18), Ube2i(0.18), Senp2(0.18), Tollip(0.17), Ptk2(0.14), Rnf2(0.14), Gemin7(0.14), Pcgf2(0.12), Sumo3(0.11), Ythdc1(0.11), Mdm2(0.1), Usp7(0.1), Trp53(0.08), Crebbp(0.07), Phc1(0.07), Hdac5(0.06), Crebrf(0.06), Ss18l1(0.06), Ncor2(0.05), Ncor2(0.05), Zkscan17(0.04), Cbx4(0.03), Mtdh(0.03), Gemin5(0.03), Nacc1(0.02), Zfhx3(0.01), Hipk2(-0.01),…
platelet alpha granule	0.0140512	0.399522	8.7662e-06	0.000135436	12	0.121315	0.000345086	0.0351592	0.00762447	0.210709	Fgb(1.88), Fgg(1.46), Fga(1.06), Thbs1(0.36), Pf4(0.34), Serpine2(0.17), Vps33b(0.11), F5(0.1), Stxbp1(0.05), Sparc(0.03), Stxbp3(0), Thbs2(-0.02),
collagen catabolic process	0.0176254	0.303348	9.30316e-06	0.000143107	21	0.0379721	0.00800718	0.0243137	0.00128131	0.343994	Mmp8(1.67), Mmp9(1.42), Mmp9(1.42), Mmp7(1.09), Mmp3(0.93), Mmp10(0.91), Mmp14(0.28), Mmp19(0.28), Ctss(0.27), Mmp11(0.23), Ctsb(0.14), Adam15(0), Adamts2(-0.01), Mmp13(-0.15), Mmp13(-0.15), Mmp13(-0.15), Pepd(-0.18), Ctsk(-0.19), Mmp2(-0.48), Mmp2(-0.48), Mrc2(-0.71),
positive regulation of pseudopodium assembly	0.0151551	0.36377	9.37429e-06	0.000143577	14	0.0334157	0.00033247	0.00978059	0.0266286	0.474144	Cdc42ep3(0.56), Gm14137(0.3), Cdc42ep5(0.22), Cdc42ep5(0.22), Cdc42ep2(0.18), Cdc42ep2(0.18), Cdc42ep4(0.16), Cdc42ep4(0.16), Cdc42ep1(0.15), Cdc42ep1(0.15), Kit(0.12), F2rl1(0.09), Apc(0.01), Wash1(-0.1),
protein palmitoylation	0.0232117	0.245691	9.4219e-06	0.000143684	30	0.00765954	0.193455	0.00544799	0.0515082	0.0178699	Zdhhc18(0.32), Zdhhc2(0.27), Zdhhc2(0.27), Zdhhc20(0.22), Zdhhc14(0.19), Zdhhc8(0.17), Zdhhc8(0.17), Selk(0.15), Zdhhc12(0.11), Zdhhc16(0.1), Zdhhc16(0.1), Zdhhc21(0.05), Zdhhc21(0.05), Zdhhc3(0.03), Zdhhc3(0.03), Zdhhc15(0), Zdhhc15(0), Zdhhc17(-0.01), Zdhhc17(-0.01), Zdhhc7(-0.02), Zdhhc7(-0.02), Zdhhc6(-0.03), Zdhhc1(-0.05), Zdhhc1(-0.05), Zdhhc5(-0.06), Zdhhc5(-0.06), Zdhhc5(-0.06), Zdhhc9(-0…
positive regulation of sequence-specific DNA binding transcription factor activity	0.0145812	0.144712	9.71696e-06	0.000147409	95	0.0371202	0.00815625	0.000625808	0.0294685	0.401904	Il6(1.08), Edn1(0.76), Il1b(0.74), Nfam1(0.61), Nfam1(0.61), Trim15(0.57), Fosl1(0.54), Sav1(0.48), Ifrd1(0.41), Rgcc(0.38), Hmga2(0.34), Tlr4(0.28), Fzd2(0.27), Kdm1a(0.27), Ngf(0.25), Anxa3(0.19), Stk3(0.19), Arid5b(0.19), Arid5b(0.19), Pprc1(0.19), Ube2i(0.18), Jak2(0.16), Ppp2r5b(0.15), Ppp3ca(0.14), Srf(0.14), Kit(0.12), Trim27(0.12), Gtf2a2(0.12), Gtf2a2(0.12), Akt1(0.11), Myocd(0.11), Myoc…
extrinsic component of cytoplasmic side of plasma membrane	0.0084882	0.179256	9.74949e-06	0.000147409	62	0.0568709	2.34448e-05	0.106107	0.00276452	0.549716	Rgs1(0.71), Syk(0.6), Fgr(0.54), Txk(0.51), Fes(0.33), Fes(0.33), Errfi1(0.27), Matk(0.26), Itk(0.25), Tec(0.24), Kras(0.23), Cyth1(0.23), Abl2(0.22), Src(0.22), Snx18(0.21), Fermt2(0.21), Fyn(0.2), Esyt2(0.19), Btk(0.17), Tnk2(0.17), Bmx(0.16), Hck(0.16), Hck(0.16), Jak2(0.16), Atp2a2(0.15), Ptk2(0.14), Kcnab1(0.1), Cdk16(0.1), Ptk2b(0.1), Iqgap1(0.09), Csk(0.08), Frk(0.08), Tnk1(0.08), Jak1(0.0…
cytoplasmic mRNA processing body assembly	0.0198161	0.359957	1.02598e-05	0.000154464	14	0.0420938	0.0704552	0.00515256	0.00718063	0.0949359	Noct(0.24), Patl1(0.15), Patl1(0.15), Edc3(0.13), Cnot7(0.11), Lsm4(0.1), Limd1(0.09), Rc3h1(0.09), Lsm14a(0.08), Ddx6(0.06), Ddx6(0.06), Atxn2(0.06), Lsm3(-0.03), Dync1h1(-0.04),
adaptive immune response	0.0135744	0.17172	1.03704e-05	0.000155468	70	0.0806513	0.000231304	0.163067	0.00191006	0.229162	Fgb(1.88), Fgg(1.46), Fga(1.06), Clec4d(1.03), Pirb(0.98), Rnf125(0.67), Lilrb4a(0.6), Syk(0.6), Eomes(0.57), Txk(0.51), Jchain(0.38), Cd84(0.34), Rnf19b(0.34), Bcl10(0.32), Mfsd6(0.26), Itk(0.25), Tec(0.24), Fyn(0.2), Anxa1(0.2), Pik3cd(0.2), Tfe3(0.18), Btk(0.17), Jak2(0.16), Ripk2(0.14), H2-T23(0.12), Ptk2b(0.1), Eif2ak4(0.1), Myo1g(0.1), Cd244(0.09), Csk(0.08), Clec4n(0.08), Fcamr(0.07), Havc…
cellular response to extracellular stimulus	0.0217241	0.325721	1.0595e-05	0.000158165	17	0.13736	0.00512605	0.0111306	0.0949877	0.0121708	Fos(0.81), Adora2b(0.67), Cdkn1a(0.54), Fosl1(0.54), Sfrp2(0.38), Nr4a2(0.32), Nr4a2(0.32), Cdkn2b(0.27), P2rx7(0.16), Bmp6(0.14), Gsdmd(0.08), Ldha(0), Itga6(-0.07), Aes(-0.11), Axl(-0.15), Tfrc(-0.26), Slc1a2(-0.75),
ribosome binding	0.0231172	0.193914	1.0851e-05	0.00016064	49	0.0394281	0.0663888	0.0667875	0.0135449	0.00578895	Gtpbp6(0.36), Cpeb1(0.34), Hspa5(0.3), Sbds(0.28), Impact(0.24), Pym1(0.24), Zc3h12a(0.21), Ighmbp2(0.19), Ighmbp2(0.19), Eri1(0.18), Eif5a2(0.18), Eif6(0.16), Naa16(0.16), Rpsa(0.15), Naa15(0.11), Mtrf1l(0.1), Eif2s1(0.09), Eif2s1(0.09), Mrpl58(0.08), Bag6(0.07), Eef2(0.06), Ythdf1(0.06), Sec61a1(0.05), Spcs1(0.05), Rpn2(0.04), Eif3c(0.04), Dnajc1(0.03), Stau2(0.03), Rictor(0.03), Cpeb2(0.02), E…
structural constituent of nuclear pore	0.0166478	0.308406	1.08516e-05	0.00016064	21	0.00264553	0.0695643	0.116636	0.0233535	0.0203298	Nup54(0.17), Nup93(0.16), Nup93(0.16), Pom121(0.12), Pom121(0.12), Nup85(0.09), Nup188(0.04), Nup153(0.03), Nup153(0.03), Nup107(0), Nup107(0), Nup133(0), Nup98(0), Nup98(0), Nup155(-0.02), Nup205(-0.03), Nup205(-0.03), Nup214(-0.07), Tmem33(-0.12), Ndc1(-0.16), Ndc1(-0.16),
Rab GTPase binding	0.0145409	0.124476	1.1528e-05	0.000169942	135	0.0299861	0.382943	0.00201463	0.00516952	0.0324133	3110043O21Rik(0.4), 3110043O21Rik(0.4), Sgsm1(0.33), Sgsm1(0.33), Sgsm1(0.33), Tbc1d15(0.31), Rac1(0.3), Wdr44(0.3), Rabgef1(0.28), Pot1b(0.27), Rab3gap1(0.26), Myrip(0.26), Myrip(0.26), Optn(0.25), Tbc1d8(0.24), Tbc1d9(0.24), Rusc2(0.24), Rims2(0.21), Chml(0.18), Hace1(0.17), Rbsn(0.15), Erc1(0.15), Tbc1d12(0.15), Ccdc64b(0.15), Als2cl(0.15), Ndrg1(0.14), Rph3al(0.14), Llgl1(0.13), Llgl1(0.13), …
positive regulation of bone resorption	0.0116101	0.320282	1.16836e-05	0.000171521	18	0.320876	5.29175e-05	0.226518	0.000524875	0.138001	Itgb3(0.82), Itgb3(0.82), Dcstamp(0.79), Syk(0.6), Spp1(0.53), Spp1(0.53), Adam8(0.42), Adam8(0.42), Trf(0.37), Egfr(0.23), Car2(0.15), Atp6ap1(0.03), Tmem64(-0.03), Ptger4(-0.04), Lrp6(-0.05), Ltbp3(-0.18), Tfrc(-0.26), Ppargc1b(-0.3),
proteasome regulatory particle, base subcomplex	0.0191507	0.389697	1.26679e-05	0.000185203	14	0.0170649	0.110205	0.00117809	0.0961183	0.0419357	Psmd10(0.15), Psmd4(0.12), Psmd1(0.12), Psmd2(0.11), Psmc2(0.1), Psmc1(0.09), Psmc4(0.08), Psmc6(0.07), Psmc3(0.05), Psmc5(0.04), Psmd5(0.02), Psmd5(0.02), Psmd9(-0.04), Psmd9(-0.04),
VCP-NPL4-UFD1 AAA ATPase complex	0.0254367	0.386634	1.28732e-05	0.000187429	12	0.0266724	0.0253476	0.0030534	0.104465	0.0636231	Nploc4(0.18), Vcp(0.17), Vcp(0.17), Vcp(0.17), Ubxn7(0.12), Ufd1l(0.08), Ufd1l(0.08), Ufd1l(0.08), Ubxn1(0.06), Faf2(0.04), Faf1(0.01), Cav1(-0.12),
response to cytokine	0.0209898	0.189168	1.34202e-05	0.00019447	50	0.0779116	0.00134109	0.0859102	0.00822056	0.114669	Ptgs2(1.16), Serpina3m(0.57), Cd274(0.52), Junb(0.48), Relb(0.48), Jun(0.46), Fntb(0.41), Rela(0.36), Jund(0.34), Serpina3n(0.32), Mapkapk2(0.29), Bcl2l1(0.28), Il6ra(0.28), Nfkb2(0.27), Nfkb1(0.24), Rel(0.23), Timp1(0.21), Osmr(0.2), Mapkapk3(0.19), Mcl1(0.17), Srf(0.14), Pml(0.13), Stat3(0.11), Tmem102(0.11), Stat6(0.09), Fnta(0.06), Ccl5(0.03), Il6st(0.01), Cxcl16(0.01), Ppp3cb(0), Synj1(-0.01…
core promoter binding	0.0159246	0.166946	1.34667e-05	0.00019447	65	0.109951	0.0436498	0.0054343	0.00122038	0.191379	Relb(0.48), Ifi204(0.34), Runx1(0.28), Runx1(0.28), Nkx3-1(0.27), Klf4(0.24), Arntl(0.23), E2f3(0.22), Zfp281(0.22), Tcf7(0.21), Elk1(0.2), Xbp1(0.19), Gadd45a(0.18), Ezh2(0.18), Ezh2(0.18), E2f2(0.18), Calcoco1(0.16), Ifi207(0.16), Cry1(0.14), Mtf1(0.14), Kdm3a(0.14), Rest(0.13), Spi1(0.13), Gtf2b(0.12), Kansl1(0.11), Ago2(0.11), Rbmxl1(0.1), Mta1(0.1), Mta1(0.1), Safb(0.09), Polr2a(0.08), Hdac1…
Ada2/Gcn5/Ada3 transcription activator complex	0.0224141	0.285249	1.36415e-05	0.000196194	23	0.00419369	0.314567	0.0186504	0.00857835	0.0362805	Sgf29(0.3), Sgf29(0.3), Tada3(0.12), Tada3(0.12), Wdr5(0.12), Wdr5(0.12), Mbip(0.12), Mbip(0.12), Dr1(0.1), Dr1(0.1), Kat2b(0.07), Kat2b(0.07), Pole4(0.07), Hcfc1(0.02), Yeats2(-0.02), Yeats2(-0.02), Tada2a(-0.02), Csrp2bp(-0.03), Csrp2bp(-0.03), Pole3(-0.04), Kat2a(-0.08), Kat2a(-0.08), Zzz3(-0.1),
late endosome	0.0245299	0.128054	1.47667e-05	0.000211517	121	0.0583977	0.193226	0.0096922	0.00228455	0.0416635	Cxcr4(0.48), Rhob(0.39), Trf(0.37), Slc30a4(0.29), Slc30a4(0.29), Zc3hav1(0.27), Gja1(0.23), Src(0.22), Map2k1(0.22), Map1lc3a(0.22), Ap5s1(0.22), Pcsk9(0.22), Nmnat2(0.22), Slc11a1(0.21), Slc11a1(0.21), Cln3(0.2), Cln3(0.2), Chmp2b(0.17), Gnpnat1(0.16), Slc31a2(0.15), Dysf(0.14), Rab31(0.14), Rab9(0.13), Micall1(0.12), Vps4a(0.12), Vps33b(0.11), Mtm1(0.09), Arf1(0.08), Lamp2(0.07), Lamp2(0.07), …
microtubule	0.0141207	0.0885605	1.50211e-05	0.000214293	269	0.0888654	0.188624	0.0300059	0.000490214	0.0271838	Mefv(1.34), Hsph1(0.79), Tuba8(0.69), Kif1a(0.62), Rassf3(0.59), Kif22(0.53), Klc3(0.46), Tuba1a(0.45), Tubb6(0.39), Kif23(0.36), Mdm1(0.35), Stmn1(0.34), Tppp3(0.34), Mid1ip1(0.34), Tubb2a(0.32), Kif3c(0.31), Reep4(0.31), Klc1(0.3), Spry2(0.3), Wdr44(0.3), Tuba1c(0.28), Eml1(0.27), Cep170(0.27), Nek2(0.26), Rassf1(0.26), Haus8(0.25), Lrrc49(0.25), Emd(0.23), Map1b(0.22), Map2k1(0.22), Map1lc3a(0…
autophagosome	0.0200232	0.193319	1.53102e-05	0.00021754	57	0.127213	0.198339	0.008318	0.00127971	0.0272015	Trp53inp1(0.66), Trp53inp1(0.66), 3110043O21Rik(0.4), 3110043O21Rik(0.4), Sqstm1(0.23), Sqstm1(0.23), Map1lc3a(0.22), Map1lc3a(0.22), Cln3(0.2), Map1lc3b(0.16), Tbc1d12(0.15), Gabarapl1(0.14), Rab12(0.13), Atg14(0.13), Atg14(0.13), Ralb(0.11), Tbc1d25(0.11), Tbc1d25(0.11), Ulk1(0.1), Atg16l1(0.1), Hap1(0.08), Osbpl7(0.08), Zfyve1(0.08), Atg5(0.07), Atg5(0.07), D17Wsu92e(0.07), Nbr1(0.06), Atg9a(0…
response to unfolded protein	0.026227	0.190923	1.62231e-05	0.00022959	48	0.0273623	0.0653028	0.00687743	0.0409225	0.048891	Hspb1(0.9), Hsph1(0.79), Chac1(0.76), Thbs4(0.74), Hsp90aa1(0.65), Hspe1(0.43), Hspa4l(0.39), Thbs1(0.36), Creb3l4(0.36), Hspd1(0.28), Manf(0.22), Yod1(0.22), Ubxn4(0.21), Ube2j2(0.21), Xbp1(0.19), Herpud2(0.19), Edem1(0.14), Upf3b(0.13), Parp16(0.13), Ern1(0.12), Creb3l1(0.11), Fbxo6(0.09), Erp44(0.09), Atf6(0.09), Upf3a(0.08), Syvn1(0.08), Crebrf(0.06), Ddit3(0.05), Faf2(0.04), Derl2(0.04), Upf…
negative regulation of hormone secretion	0.0198659	0.42891	1.65e-05	0.000232578	11	0.0842274	0.00333271	0.0161164	0.00719262	0.272856	Il6(1.08), Osm(1), Il11(0.92), Edn1(0.76), Lif(0.73), Nmb(0.51), Ptpn11(0.09), Edn3(0.01), Adora1(-0.08), Npy1r(-0.26), Adipoq(-3.04),
3'-UTR-mediated mRNA destabilization	0.00494392	0.395109	1.66472e-05	0.000233721	18	0.171461	0.00163582	0.005963	0.0450446	0.118939	Zfp36(0.41), Zfp36(0.41), Zfp36(0.41), Zfp36l1(0.31), Zfp36l1(0.31), Zfp36l1(0.31), Zfp36l1(0.31), Zc3h12a(0.21), Zc3h12a(0.21), Qk(0.15), Rc3h1(0.09), Upf1(0.06), Hnrnpd(0.02), Zfp36l2(0), Zfp36l2(0), Zfp36l2(0), Zc3h12d(-0.38), Cpeb3(-0.65),
negative regulation of myoblast differentiation	0.0123043	0.359366	1.74572e-05	0.000244125	18	0.0146801	0.000247288	0.0831091	0.0971347	0.181462	Il1f9(1.34), Ankrd2(1), Ankrd2(1), Id3(0.53), Sox9(0.41), Tgfb1(0.26), Il18(0.25), Mbnl3(0.17), Ppard(0.11), Ccl9(0.1), Cxcl14(0.07), Ddit3(0.05), Notch1(0.03), Dll1(-0.03), Cxcl10(-0.05), Tbx3(-0.08), Bmp4(-0.15), Tnf(-0.26),
decidualization	0.0112037	0.390162	1.75365e-05	0.000244268	14	0.120843	3.57749e-05	0.00909017	0.00633696	0.77165	Ptgs2(1.16), Ptgs2(1.16), Lif(0.73), Lif(0.73), Junb(0.48), Ctsl(0.43), Cited2(0.27), Cdh1(0.26), Ctsb(0.14), Dedd(0.12), Il11ra1(-0.03), Pla2g4a(-0.08), Epor(-0.17), Ptgis(-0.24),
trophectodermal cell differentiation	0.0254587	0.320007	1.77132e-05	0.000245762	17	0.0470964	0.0388673	0.00722934	0.0109246	0.142122	Eomes(0.57), Eomes(0.57), Junb(0.48), Junb(0.48), Cited2(0.27), Cdh1(0.26), Hopx(0.22), Hopx(0.22), Srf(0.14), Ada(0.13), Cnot3(0.1), Cnot2(0.09), Sp1(0.08), Bysl(0.05), Ctr9(0.01), Sp3(-0.01), Cnot1(-0.11),
positive regulation of protein autophosphorylation	0.0282359	0.301787	1.79674e-05	0.000248315	19	0.00576391	0.041541	0.0110157	0.148215	0.049828	Rap2b(0.42), Rassf2(0.42), Pdgfa(0.31), Pdgfa(0.31), Ngf(0.25), Pdgfb(0.25), Pdgfb(0.25), Src(0.22), Vegfc(0.19), Rap2c(0.16), Rap2a(0.15), Rap2a(0.15), Vegfa(0.06), Mre11a(0), Nbn(-0.03), Tom1l1(-0.03), Rad50(-0.05), Pdgfc(-0.17), Pdgfd(-0.18),
SUMO-specific protease activity	0.0264789	0.4326	1.82805e-05	0.000251659	10	0.0166882	0.165164	0.00334948	0.0483414	0.0394282	Senp2(0.18), Senp2(0.18), Senp5(0.1), Senp3(0.07), Senp6(0.07), Senp6(0.07), Fam76b(0.06), Fam76a(0.03), Senp1(0), Senp1(0),
Arp2/3 complex-mediated actin nucleation	0.0247192	0.330794	1.97503e-05	0.000270839	16	0.0368903	0.0241965	0.0354786	0.0011414	0.283414	Arpc1b(0.32), Arpc1b(0.32), Arpc5(0.24), Arpc3(0.23), Actr3b(0.23), Arpc2(0.17), Actr3(0.14), Trim27(0.12), Arpc4(0.09), Jmy(0.07), Arpc1a(0.06), Actr2(0.05), Arpc5l(0.02), Iqgap2(-0.03), Wash1(-0.1), Wash1(-0.1),
protein tyrosine kinase activity	0.00936775	0.136422	2.23432e-05	0.000305213	127	0.0369177	0.00100772	0.00915274	0.00311987	0.800292	Hsp90aa1(0.65), Syk(0.6), Syk(0.6), Syk(0.6), Fgr(0.54), Txk(0.51), Epha2(0.43), Musk(0.36), Fes(0.33), Clk1(0.29), Matk(0.26), Itk(0.25), Tec(0.24), Tyro3(0.24), Egfr(0.23), Flt4(0.23), Abl2(0.22), Abl2(0.22), Abl2(0.22), Abl2(0.22), Src(0.22), Src(0.22), Map2k1(0.22), Map2k3(0.22), Peak1(0.22), Fyn(0.2), Fyn(0.2), Fyn(0.2), Map2k7(0.2), Flt1(0.19), Btk(0.17), Btk(0.17), Map2k4(0.17), Tnk2(0.17)…
retrograde transport, endosome to Golgi	0.0267385	0.178698	2.28234e-05	0.000310183	60	0.0113007	0.149413	0.0259174	0.0070418	0.0811377	Bet1l(0.24), Ube2o(0.23), Rab6a(0.22), Snx1(0.21), Vamp3(0.17), Plekhj1(0.17), Fam109a(0.17), Erc1(0.15), Rab9(0.13), Tbc1d17(0.13), Trim27(0.12), Rhobtb3(0.12), Dennd5a(0.11), Stx5a(0.11), Ykt6(0.11), Rgp1(0.11), Rgp1(0.11), Rab6b(0.11), Stx6(0.1), Tbc1d10b(0.1), Vti1b(0.09), Gosr2(0.09), Rnf126(0.09), Arl1(0.09), Vps54(0.05), Vps54(0.05), Ap1s1(0.04), Spag9(0.04), Rab7(0.03), Vps51(0.03), Gosr1…
cis-Golgi network	0.0278123	0.222702	2.28824e-05	0.000310183	39	0.0196918	0.100935	0.0638702	0.0038819	0.0555618	Ctgf(0.55), Tmed5(0.4), Fam134b(0.28), Kdelr2(0.12), Phtf1(0.1), Nucb1(0.08), Ift20(0.07), B3gat3(0.07), Bcl9(0.06), Bcl9(0.06), Scyl1(0.06), Cog3(0.06), Golga5(0.05), Kdelr1(0.05), Kdelr1(0.05), Angel1(0.03), Limk2(0.02), Golga2(0.02), Golga2(0.02), Slc35c2(0.01), Gosr1(0), Gosr1(0), Golgb1(0), Man2a1(-0.01), Tmed10(-0.02), Tmed10(-0.02), Scfd1(-0.02), Yipf6(-0.03), Sec23ip(-0.03), Trip11(-0.04)…
negative regulation of neuron apoptotic process	0.0198898	0.119111	2.39304e-05	0.000323152	133	0.0806325	0.00710469	0.00298225	0.0211975	0.322981	Hsph1(0.79), Mt1(0.77), Gdnf(0.72), Gdnf(0.72), Ntf5(0.63), Hmox1(0.61), Cebpb(0.52), Cacna1a(0.49), Btg2(0.48), Jun(0.46), Adam8(0.42), Hsp90ab1(0.4), Nr4a2(0.32), Bcl2l1(0.28), Bcl2l1(0.28), Bcl2l1(0.28), Gclc(0.28), Hspd1(0.28), Star(0.28), Fam134b(0.28), Fam134b(0.28), Oxr1(0.28), Nr4a3(0.27), Ngf(0.25), Ngf(0.25), Optn(0.25), Hif1a(0.24), Tyro3(0.24), Kras(0.23), Erbb3(0.22), Mt3(0.22), Lig4…
actin cytoskeleton organization	0.0106589	0.125053	2.45419e-05	0.000330149	143	0.0280799	0.00399966	0.0290044	0.000117481	0.854818	Ccr7(2.19), Pak3(0.85), Rhou(0.45), Pdlim7(0.37), Pdgfa(0.31), Fmnl2(0.31), Rhoj(0.31), Rhoj(0.31), Rac1(0.3), Rhog(0.3), Sh2b2(0.28), Sh2b2(0.28), Spire2(0.27), Spire2(0.27), Fhl3(0.25), Pdgfb(0.25), Pdgfb(0.25), Kras(0.23), Rac2(0.23), Rac2(0.23), Rock2(0.23), Inf2(0.23), Abl2(0.22), Tmsb10(0.21), Cln3(0.2), Sdcbp(0.2), Tmsb4x(0.19), Trip10(0.19), Fscn1(0.18), Cdc42ep2(0.18), Flii(0.17), Vasp(0…
anaphase-promoting complex	0.0285543	0.26525	2.54285e-05	0.00034078	25	0.17479	0.00994877	0.0287214	0.0291216	0.022626	Mad2l2(0.18), Cacul1(0.16), Anapc16(0.15), Anapc2(0.13), Anapc2(0.13), Anapc7(0.11), Cdc26(0.11), Ube2s(0.11), Cdc16(0.07), Cdc23(0.06), Fzr1(0.06), Anapc4(0.05), Anapc15(0.03), Anapc15(0.03), Anapc11(0.02), Anapc11(0.02), Anapc13(0.02), Cdc27(0.02), Rbx1(0.01), Anapc5(0), Anapc10(-0.04), Anapc10(-0.04), Ube2c(-0.08), Anapc1(-0.11), Cdc20(-0.13),
embryo implantation	0.0195172	0.240575	2.64267e-05	0.000352821	32	0.0134386	0.00835703	0.0171237	0.00246201	0.689958	Mmp9(1.42), Acod1(1.34), Ptgs2(1.16), Ptgs2(1.16), Pzp(0.75), Lif(0.73), Lif(0.73), Vmp1(0.48), Emp2(0.37), Emp2(0.37), Tead4(0.36), Ggn(0.29), Cdh1(0.26), H3f3b(0.21), Sod1(0.14), Ppard(0.11), Ppard(0.11), Stx2(0.09), Trim28(0.09), Fkbp4(0.02), Ube2q1(0.02), Rxra(0.01), Pcsk5(0), Grn(-0.02), Lamb1(-0.04), Klf9(-0.08), Polr1b(-0.08), Ddr1(-0.1), Ptgis(-0.24), Reck(-0.28), H2-Q7(-0.29), Mmp2(-0.48…
cellular response to interleukin-1	0.0198914	0.22999	2.68065e-05	0.000356547	40	0.0607604	0.000928994	0.0576584	0.00287006	0.486175	Saa3(2.67), Acod1(1.34), Il6(1.08), Ccl20(0.91), Serpine1(0.8), Ccl22(0.73), Ccl6(0.68), Cebpb(0.52), Rela(0.36), Nfkb1(0.24), Ankrd1(0.24), Zc3h12a(0.21), Cactin(0.18), Hyal3(0.18), Tank(0.17), Rora(0.15), Ccl9(0.1), Rc3h1(0.09), Yy1(0.08), Upf1(0.06), Ccl25(0.04), Ccl21a(0.03), Ccl5(0.03), Dab2ip(-0.01), Dab2ip(-0.01), Hyal1(-0.02), Usp10(-0.02), Irf1(-0.03), Rbmx(-0.05), Pycard(-0.08), Hyal2(-…
positive regulation of peptidyl-tyrosine phosphorylation	0.012164	0.159666	2.7784e-05	0.000368163	86	0.11814	8.75175e-05	0.07071	0.00151052	0.640458	Cd80(2.51), Il6(1.08), Osm(1), Osm(1), Il11(0.92), Itgb3(0.82), Thbs4(0.74), Lif(0.73), Syk(0.6), Csf3(0.53), Musk(0.36), Efna1(0.35), Cd44(0.33), Cd44(0.33), Itga5(0.33), Il6ra(0.28), Tlr4(0.28), Efna5(0.26), Tgfb1(0.26), Pdgfb(0.25), Tec(0.24), Itgb1(0.22), Src(0.22), Ehd4(0.22), Cd24a(0.21), Arrb2(0.21), Hax1(0.2), Vegfc(0.19), Pak2(0.19), Tnk2(0.17), Hgf(0.16), Jak2(0.16), Igf2(0.15), Kitl(0.…
GTPase activity	0.0225581	0.0922418	2.80356e-05	0.000370112	208	0.15841	0.00824488	0.158621	0.0346803	0.00260725	Tuba8(0.69), Tuba1a(0.45), Rhou(0.45), Gng4(0.42), Tubb6(0.39), Tubb2a(0.32), Gem(0.31), Rhoj(0.31), Rac1(0.3), Rac1(0.3), Rhog(0.3), Tuba1c(0.28), Rab10(0.27), Rap1b(0.26), Gnl2(0.26), Nras(0.25), Rras(0.25), Kras(0.23), Kras(0.23), Rac2(0.23), Gnao1(0.22), Gnao1(0.22), Gnao1(0.22), Rab11b(0.22), Rab11b(0.22), Rab6a(0.22), Gtpbp2(0.21), Gtpbp1(0.2), Gtpbp1(0.2), Rab11a(0.18), Rab35(0.18), Tubb5(…
protein serine/threonine phosphatase activity	0.0241836	0.186048	2.94262e-05	0.000387025	52	0.221515	0.155358	0.00617099	0.00378243	0.0212199	Ppm1j(0.58), Ppp2r2a(0.31), Ppp2r2a(0.31), Ppp2cb(0.26), Ppp2r2d(0.25), Pdp1(0.2), Ppm1a(0.17), Ppp4c(0.16), Ppp4c(0.16), Ppm1f(0.15), Ppp1cc(0.14), Ppp1cc(0.14), Ppp3ca(0.14), Ppm1g(0.12), Ppp2ca(0.12), Ppp2ca(0.12), Ppp1r15b(0.11), Ppm1b(0.06), Ppp2r1a(0.06), Ilkap(0.05), Ppp1ca(0.04), Ppp1ca(0.04), Ppp1ca(0.04), Rpap2(0.04), Phlpp2(0.04), Ppp1cb(0.03), Ctdnep1(0.03), Ppm1m(0.03), Ppp3cb(0), Ub…
ubiquitin-dependent protein catabolic process via the multivesicular body sorting pathway	0.0314087	0.391675	2.99639e-05	0.000392298	11	0.0277818	0.183594	0.00481002	0.0580938	0.0229027	Ubap1(0.22), Ubap1(0.22), Ptpn23(0.19), Vps4a(0.12), Vps4b(0.11), Vps37a(0.09), Rnf126(0.09), Tsg101(0.07), Hdac6(0.06), Rnf115(0.03), Vps28(-0.03),
PcG protein complex	0.0237844	0.241166	3.00488e-05	0.000392298	32	0.0386772	0.117684	0.00318316	0.0233251	0.0965577	Pcgf1(0.39), Pcgf5(0.27), Csnk2a2(0.23), Phc2(0.22), Phc2(0.22), Rybp(0.19), Rnf2(0.14), Rnf2(0.14), Pcgf2(0.12), Pcgf2(0.12), Kdm2b(0.09), Yy1(0.08), Phc1(0.07), Pcgf3(0.07), Pcgf6(0.07), Cbx2(0.04), Cbx2(0.04), Cbx4(0.03), Csnk2b(0.01), Ring1(-0.01), Ring1(-0.01), Csnk2a1(-0.02), Bcor(-0.02), Bmi1(-0.04), Ubap2l(-0.05), Skp1a(-0.06), Cbx7(-0.06), Phc3(-0.06), Phc3(-0.06), Cbx8(-0.11), Cbx8(-0.1…
p53 binding	0.0201824	0.166024	3.04163e-05	0.000394964	70	0.00285877	0.0670134	0.0208714	0.0277825	0.225674	Plk3(0.37), Hspd1(0.28), Kdm1a(0.27), Ankrd1(0.24), Sirt1(0.2), Sirt1(0.2), Ptges3(0.19), Daxx(0.18), Rffl(0.18), Cdkn2aip(0.17), Cdkn2aip(0.17), Ybx1(0.15), Zfp385a(0.14), Zfp385a(0.14), Taf9(0.14), Pttg1ip(0.14), Axin1(0.13), Ppp1r13b(0.13), Noc2l(0.11), Mdm2(0.1), Mdm2(0.1), Zmat1(0.1), Usp7(0.1), Stk11(0.08), Trp53(0.08), Gsk3b(0.08), Setd7(0.08), Smyd2(0.08), Crebbp(0.07), Trp53rkb(0.07), Ta…
peptidyl-serine phosphorylation	0.0182637	0.113893	3.04763e-05	0.000394964	152	0.208429	0.303924	0.0124196	7.76257e-05	0.0533546	Cdk5r1(1.12), Hipk4(0.65), Syk(0.6), Plk2(0.42), Camk2d(0.42), Camk2d(0.42), Prkx(0.36), Csnk1e(0.33), Csnk1e(0.33), Mapk13(0.31), Myo3b(0.3), Brsk1(0.3), Clk1(0.29), Mapkapk2(0.29), Mapkapk2(0.29), Tgfbr1(0.27), Vrk2(0.26), Grk2(0.26), Pdgfb(0.25), Ttbk2(0.23), Ttbk2(0.23), Src(0.22), Mast4(0.22), Mknk2(0.21), Mapk7(0.2), Csnk1d(0.2), Csnk1d(0.2), Lats2(0.19), Stk32c(0.19), Mapkapk3(0.19), Mapka…
negative regulation of viral release from host cell	0.0278722	0.30489	3.24535e-05	0.000419053	18	0.0505345	0.147788	0.00276577	0.0449202	0.0379389	Trim15(0.57), Pml(0.13), Pml(0.13), Trim27(0.12), Trim11(0.12), Trim11(0.12), Trim35(0.1), Trim28(0.09), Trim26(0.09), Chmp3(0.06), Trim32(0.06), Mid2(0.04), Trim25(0.03), Trim8(0.02), Trim8(0.02), Trim13(-0.03), Trim56(-0.04), Trim21(-0.13),
positive regulation of apoptotic signaling pathway	0.0329005	0.206465	3.27249e-05	0.000421021	39	0.0499278	0.0107587	0.0583619	0.0978462	0.0170028	Inhbb(1.02), Osm(1), Trp53inp1(0.66), Bmf(0.44), Apaf1(0.34), Ctsc(0.34), Trim39(0.33), Nkx3-1(0.27), Tgfbr1(0.27), Nfatc4(0.21), Daxx(0.18), Daxx(0.18), Myc(0.18), Myc(0.18), Traf7(0.17), Jak2(0.16), Ing5(0.16), Casp2(0.13), Pml(0.13), Pml(0.13), Rps3(0.09), Pdcd7(0.09), Eef1e1(0.05), Mapk8(0.04), Prkcd(0.02), Camk2b(0), Dab2ip(-0.01), Ctsh(-0.03), Maged1(-0.03), Mapk9(-0.05), Pidd1(-0.05), Pten…
protein K11-linked ubiquitination	0.0317418	0.254607	3.51426e-05	0.000450487	26	0.126008	0.0216356	0.0222177	0.0378233	0.026431	Ube2t(0.74), Ube2e2(0.28), Rnf4(0.21), Ube2d3(0.16), Ube2b(0.13), Anapc2(0.13), Anapc7(0.11), Cdc26(0.11), Ube2s(0.11), Ube2l3(0.08), Ube2a(0.07), Cdc16(0.07), Cdc23(0.06), Ube2h(0.05), Anapc4(0.05), Ube2w(0.05), Ube2e3(0.03), Anapc11(0.02), Anapc13(0.02), Cdc27(0.02), Anapc5(0), Anapc10(-0.04), Anapc10(-0.04), Ube2c(-0.08), Anapc1(-0.11), Park2(-0.42),
positive regulation of vascular endothelial growth factor production	0.0243146	0.30333	3.56714e-05	0.000455616	20	0.112481	0.00560314	0.117088	0.000787201	0.217338	Ptgs2(1.16), Il1b(0.74), Il1b(0.74), Adora2b(0.67), Sulf1(0.47), Atf4(0.45), Hif1a(0.24), Flt4(0.23), Rora(0.15), C5ar1(0.11), Arnt(0.1), Ccbe1(0.09), Eif2ak3(-0.04), Eif2ak3(-0.04), Cyp1b1(-0.11), Sulf2(-0.11), Hpse(-0.33), C3(-0.34), C3ar1(-0.36), Brca1(-0.57),
mitotic nuclear division	0.00331321	0.122455	3.58799e-05	0.000456418	239	0.0283945	0.235746	0.00805882	0.0326109	0.022585	Ccng2(0.57), Ccnf(0.45), Phf13(0.41), Klhl21(0.39), Kif23(0.36), Hmga2(0.34), Ttyh1(0.33), Nedd1(0.32), Gem(0.31), Zwint(0.31), Ctdp1(0.31), Reep4(0.31), Mis18a(0.3), Rps6(0.28), Nek2(0.26), Arl8a(0.26), Ppp2r2d(0.25), Haus8(0.25), Cenpt(0.24), Sycp3(0.23), Map2k1(0.22), Nde1(0.22), Rcc1(0.22), Bub1b(0.21), Snx18(0.21), Mis12(0.2), Lats2(0.19), Katnb1(0.19), Ube2i(0.18), Reep3(0.18), Mad2l2(0.18)…
defense response to bacterium	0.0148538	0.183722	3.59923e-05	0.000456418	64	0.133105	2.05738e-05	0.160377	0.00673688	0.420864	Mmp7(1.09), Defb19(1.06), Clec4d(1.03), Clec4e(1.01), Slpi(0.8), Tlr6(0.77), Pglyrp1(0.68), Syk(0.6), Cebpb(0.52), Ncf1(0.48), Fcer1g(0.45), Adamts4(0.42), Slc11a1(0.21), Anxa3(0.19), Defb1(0.17), Nlrc4(0.16), Nlrc4(0.16), Lyz2(0.15), Stab1(0.14), Tnfrsf1a(0.13), Fcgr1(0.12), H2-K1(0.12), Tlr5(0.08), H2-M3(0.06), H2-M3(0.06), Plac8(0.06), Bcl3(0.05), Rbpj(0.04), Nos2(0.03), Nos2(0.03), Adamts5(0.…
positive regulation of gene silencing by miRNA	0.0278801	0.364436	3.64389e-05	0.000460431	13	0.0679014	0.0593047	0.00141821	0.0211574	0.211217	Nfkb1(0.24), Wtip(0.17), Wtip(0.17), Fxr1(0.14), Stat3(0.11), Limd1(0.09), Limd1(0.09), Pum2(0.05), Ajuba(0.03), Ajuba(0.03), Fmr1(-0.02), Fmr1(-0.02), Pum1(-0.06),
NuRD complex	0.0280889	0.255106	3.77487e-05	0.000475285	28	0.0178936	0.337736	0.0149802	0.00548601	0.0527504	Chd5(0.32), Appl1(0.15), Mta2(0.13), Mta2(0.13), Mta2(0.13), Gatad2b(0.11), Mta1(0.1), Hdac1(0.07), Hdac1(0.07), Hdac1(0.07), Hdac2(0.05), Mta3(0.03), Rbbp7(0.02), Rbbp7(0.02), Rbbp4(0), Rbbp4(0), Nacc2(0), Mbd3(-0.01), Csnk2a1(-0.02), Chd4(-0.03), Chd4(-0.03), Gatad2a(-0.07), Gatad2a(-0.07), Appl2(-0.1), Chd3(-0.11), Chd3(-0.11), Sall1(-0.15), Sall2(-0.43),
transcription initiation from RNA polymerase II promoter	0.0316105	0.231146	3.8152e-05	0.000478658	31	0.0443752	0.0390193	0.00353469	0.0784557	0.101694	Gtf2f2(0.24), Taf5(0.21), Gtf2e2(0.18), Gtf2e1(0.17), Tcf4(0.15), Polr2d(0.15), Med4(0.13), Gtf2a1(0.13), Gtf2a2(0.12), Maz(0.11), Taf7(0.11), Gtf2f1(0.1), Med26(0.09), Taf11(0.08), Taf4(0.06), Med13(0.05), Med12(0.04), Polr2g(0.03), Med17(0.02), Taf10(0.01), Thrap3(0.01), Med1(-0.01), Ercc3(-0.03), Taf12(-0.03), Med16(-0.03), Med30(-0.05), Med14(-0.06), Med24(-0.08), Polr2i(-0.09), Taf2(-0.1), T…
maturation of LSU-rRNA	0.02656	0.324863	4.00223e-05	0.000499806	16	0.000416484	0.0918315	0.0631767	0.0638447	0.136415	Las1l(0.28), Nsa2(0.19), Eif6(0.16), Rsl1d1(0.15), Rrp15(0.15), Nhp2l1(0.12), Nhp2(0.12), Mak16(0.11), Tex10(0.11), Rpl10a(0.1), Wdr37(0.05), Nop2(0.04), Rpf1(0.03), Rpl7a(0.01), Wdr12(-0.02), Mrpl1(-0.07),
positive regulation of cell migration	0.00970739	0.106296	4.01201e-05	0.000499806	191	0.0209178	5.17515e-06	0.392572	0.00524582	0.676649	Mmp3(0.93), Itgb3(0.82), Wnt11(0.8), Edn1(0.76), Sphk1(0.66), Drd1(0.57), Tnfaip6(0.57), S1pr1(0.56), Fgr(0.54), Cd274(0.52), Cxcr4(0.48), Sema7a(0.47), Sema4c(0.42), Ccr1(0.4), Cyr61(0.4), Cyr61(0.4), Hbegf(0.36), Thbs1(0.36), Smad3(0.35), Cpeb1(0.34), Gcnt2(0.34), Itga5(0.33), Irs2(0.33), Pdgfa(0.31), Pdgfa(0.31), Hspa5(0.3), Sema3f(0.3), Fgfr1op(0.29), Zfp703(0.29), Ager(0.28), Mmp14(0.28), Tg…
platelet activation	0.0290304	0.25428	4.21552e-05	0.000523316	26	0.138151	0.00275913	0.0560295	0.0100018	0.155597	Fgb(1.88), Fgg(1.46), Fga(1.06), Itgb3(0.82), Rap2b(0.42), Pf4(0.34), Entpd1(0.33), Tyro3(0.24), P2ry12(0.2), Fzd6(0.18), Gna13(0.16), Srf(0.14), Pik3cb(0.13), F5(0.1), Bloc1s3(0.08), Evl(0.04), Mertk(0.04), Entpd2(-0.01), C1galt1c1(-0.03), P2rx1(-0.08), Axl(-0.15), P2ry1(-0.18), F2r(-0.19), Cx3cl1(-0.32), F8(-0.41), Vwf(-0.51),
proteasome assembly	0.0331165	0.330503	4.35096e-05	0.000538242	15	0.0281747	0.230018	0.0185147	0.0483881	0.00862032	Adrm1(0.25), Psmd11(0.25), Psmd11(0.25), Psmd8(0.17), Psmd4(0.12), Pomp(0.12), Pomp(0.12), Shfm1(0.11), Psmg4(0.11), Psmd13(0.1), AI314180(0.07), Psmd5(0.02), Psmg2(-0.14), Psmg2(-0.14), Psmg1(-0.16),
U2 snRNP	0.0347654	0.265028	4.54937e-05	0.000560824	24	0.00470696	0.0363877	0.104723	0.0558839	0.0649538	Snrpa1(0.25), Snrpd1(0.24), Rbmx2(0.16), Snrpb2(0.14), Snrpb2(0.14), Phf5a(0.14), Phf5a(0.14), Snrpb(0.13), Snrpb(0.13), Sf3b6(0.11), Snrpe(0.1), Sf3a2(0.09), Ccdc97(0.09), Sf3b5(0.07), Sf3b1(0.06), Sf3b1(0.06), Sf3b2(0.03), Snrpd2(0.02), Sf3a1(-0.03), Htatsf1(-0.05), Snrpd3(-0.06), Snrpn(-0.23), Snrpn(-0.23), Snrpg(-0.24),
fibronectin binding	0.0174767	0.271518	4.58965e-05	0.000563826	26	0.247575	0.00026033	0.370387	0.00187514	0.0861777	Mmp9(1.42), Itgb3(0.82), Thbs4(0.74), Igfbp3(0.67), Ctgf(0.55), Tnc(0.41), Thbs1(0.36), Sdc4(0.34), Ctss(0.27), Itga3(0.26), Itgb1(0.22), Itgav(0.19), Vegfa(0.06), Hsd17b12(-0.01), Plekha2(-0.06), Itga4(-0.07), Itga4(-0.07), Fstl3(-0.08), Mmp13(-0.15), Ctsk(-0.19), Ssc5d(-0.27), Igfbp5(-0.31), Fbln1(-0.39), Mmp2(-0.48), Mfap2(-0.61), Ccdc80(-0.65),
regulation of RNA splicing	0.0347253	0.259976	4.6398e-05	0.000568014	24	0.0875573	0.0258945	0.0152441	0.0403339	0.0631621	Aff2(0.65), Rbm38(0.42), Clk1(0.29), Prx(0.23), Mbnl3(0.17), Clk4(0.16), Clk3(0.16), Ahnak(0.12), Mbnl2(0.12), Clk2(0.11), Hnrnph1(0.1), Aggf1(0.1), Son(0.08), Esrp2(0.07), Rbfox2(0.07), Brdt(0.07), Cdk12(0.05), Snrnp70(0.03), Pqbp1(0.03), Hnrnpf(-0.02), Esrp1(-0.02), Zfp326(-0.04), Mbnl1(-0.08), Fastk(-0.1),
GDP binding	0.0294145	0.172141	5.01976e-05	0.00061241	57	0.21086	0.0289974	0.0455455	0.0965217	0.00131914	Rap2b(0.42), Rhob(0.39), Gem(0.31), Rab10(0.27), Rap1b(0.26), Rras(0.25), Kras(0.23), Rab11b(0.22), Prps1(0.21), Rab8b(0.2), Rab35(0.18), Rab40c(0.18), Rala(0.16), Rap2c(0.16), Ran(0.15), Rab31(0.14), Gnai3(0.13), Rab12(0.13), Rab9(0.13), Rheb(0.12), Rab3b(0.12), Rab5a(0.12), Ralb(0.11), Rab21(0.11), Mief1(0.09), Arf1(0.08), Rab22a(0.04), Arl2(0.04), Srp54b(0.04), Rab7(0.03), Rhoa(0.02), Rab18(0.…
positive regulation of cytosolic calcium ion concentration	0.00971217	0.163361	5.31294e-05	0.000645952	106	0.309365	2.97313e-07	0.341759	0.0128799	0.295099	Cxcl3(2.56), Cxcl2(1.86), Fpr2(1.55), Fpr1(1.5), Cxcr2(1.44), Tac1(1.42), Tac1(1.42), Kng1(0.89), Edn1(0.76), Il1b(0.74), Cxcl1(0.59), Nmb(0.51), Bdkrb2(0.5), Cacna1a(0.49), Cacna1a(0.49), Ccr1(0.4), Fzd2(0.27), P2ry2(0.26), Gja1(0.23), Abl2(0.22), Cd24a(0.21), Swap70(0.21), Itgav(0.19), Gna13(0.16), Jak2(0.16), C5ar2(0.16), Calcr(0.15), Sppl3(0.14), Adm(0.13), Gnb1(0.13), C1qtnf1(0.13), Ccr5(0.1…
peptide alpha-N-acetyltransferase activity	0.0340006	0.366004	5.36514e-05	0.000650064	12	0.00836895	0.129845	0.104915	0.0936368	0.0050989	Naa16(0.16), Naa16(0.16), Naa20(0.11), Naa15(0.11), Naa30(0.07), Naa30(0.07), Naa25(0.07), Naa50(0.05), Naa50(0.05), Naa10(-0.05), Naa60(-0.08), Naa60(-0.08),
3'-5'-exoribonuclease activity	0.0317497	0.286821	5.48789e-05	0.000662667	21	0.0152563	0.226082	0.027848	0.0103862	0.0657394	Isg20(0.32), Usb1(0.22), Usb1(0.22), Pan2(0.2), Cnot7(0.11), Xrn2(0.1), Exosc10(0.09), Cnot8(0.08), Isg20l2(0.07), Toe1(0.04), Rexo2(0.01), Exosc3(0), Dxo(-0.01), Dis3(-0.02), Dis3(-0.02), Dis3l(-0.02), Dis3l(-0.02), Dis3l2(-0.03), Dis3l2(-0.03), Xrn1(-0.04), Pnpt1(-0.06),
negative regulation of cell proliferation	0.0183183	0.0744462	5.61113e-05	0.000673192	353	0.147896	0.000561015	0.0172973	0.00811125	0.572826	Nfe2(1.62), Gal(1.34), Slfn1(1.27), Ptgs2(1.16), Il6(1.08), Sstr4(1.04), Osm(1), Il1b(0.74), Cyp27b1(0.73), Lif(0.73), Ereg(0.71), Adora2b(0.67), Igfbp3(0.67), Sox4(0.67), Trp53inp1(0.66), Trpv2(0.62), Hmox1(0.61), Cdkn1a(0.54), Cdkn1a(0.54), Fosl1(0.54), Inhba(0.54), Nos3(0.53), Il1rl1(0.52), Tes(0.52), Bdkrb2(0.5), Tgif1(0.49), Btg2(0.48), Jun(0.46), Cdh5(0.45), Btg1(0.44), Btg1(0.44), Smad1(0.…
negative regulation of T cell receptor signaling pathway	0.0322698	0.329123	5.6131e-05	0.000673192	16	0.287245	0.0322298	0.0365626	0.00982267	0.0178148	Ptpn22(0.83), Ptpn2(0.3), Cblb(0.29), Ezr(0.23), Dusp22(0.17), Lgals3(0.14), Pawr(0.14), Elf1(0.11), Ptprj(0.1), Ptprj(0.1), Phpt1(0.01), Dusp3(-0.01), Dusp3(-0.01), Ptpn6(-0.04), Prnp(-0.12), Thy1(-0.48),
activation of adenylate cyclase activity	0.0290053	0.392817	5.72247e-05	0.00068399	11	0.195123	0.00321186	0.0646315	0.170365	0.00505732	Calca(0.84), Calca(0.84), Drd1(0.57), Drd1(0.57), Adrb2(0.54), Adcy1(0.23), Gnal(0.07), Adcy4(0.06), Adcy7(-0.22), Adcy3(-0.26), Tshr(-0.3),
U4/U6 x U5 tri-snRNP complex	0.0320007	0.260605	5.86503e-05	0.000698669	25	0.00683763	0.0225559	0.142349	0.0235212	0.13838	Lsm2(0.24), Lsm2(0.24), Lsm8(0.18), Snrpb(0.13), Nhp2l1(0.12), Prpf3(0.12), Sart1(0.11), Snrpe(0.1), Ddx23(0.1), Prpf4(0.08), Prpf4(0.08), Txnl4b(0.08), Ppih(0.06), Prpf18(0.05), Prpf6(0.03), Prpf6(0.03), Snrpd2(0.02), Zmat2(0.01), Lsm3(-0.03), Lsm3(-0.03), Prpf31(-0.04), Lsm6(-0.07), Txnl4a(-0.09), Lsm5(-0.09), Snrpn(-0.23),
deadenylation-dependent decapping of nuclear-transcribed mRNA	0.0320451	0.381738	6.09946e-05	0.000724158	11	0.028494	0.118863	0.0295291	0.0360704	0.0342957	Noct(0.24), Pan3(0.17), Dcp1a(0.16), Patl1(0.15), Patl1(0.15), Cnot7(0.11), Cnot7(0.11), Dcp1b(0.1), Lsm1(0.08), Dcp2(0.03), Dcps(-0.12),
positive regulation of pathway-restricted SMAD protein phosphorylation	0.0286138	0.19817	6.30716e-05	0.000746312	42	0.27204	0.00263138	0.0271474	0.0295567	0.0863125	Inhbb(1.02), Bmp8b(1), Inhba(0.54), Inhba(0.54), Bmp8a(0.44), Hfe(0.39), Tgfbr1(0.27), Tgfb1(0.26), Tgfb1(0.26), Gdf15(0.26), Dab2(0.23), Dab2(0.23), Sdcbp(0.2), Lefty1(0.19), Rbpms(0.16), Bmp6(0.14), Bmp6(0.14), Smad4(0.13), Bmp2(0.11), Bmp2(0.11), Bmpr1a(0.11), Bmpr2(0.09), Acvr1b(0.08), Tgfb3(0.07), Acvr2a(0.02), Csnk2b(0.01), Acvr1(0), Acvr1(0), Tgfb2(0), Bmp7(-0.09), Bmp7(-0.09), Eng(-0.09),…
positive regulation of T cell proliferation	0.0123033	0.226018	6.4747e-05	0.000763583	48	0.345657	1.39166e-05	0.309959	0.00383421	0.209404	Cd80(2.51), Cd80(2.51), Ccr7(2.19), Il6(1.08), Il1b(0.74), Cd274(0.52), Pnp(0.35), Pnp(0.35), Ptprc(0.24), Anxa1(0.2), Cd59b(0.18), Selk(0.15), Cd46(0.11), Nck2(0.08), Sash3(0.06), Nckap1l(0.06), Havcr2(0.06), Efnb1(0.03), Ccl5(0.03), Nck1(0.02), Hes1(0.01), Il6st(0.01), Dhps(0.01), Cd1d1(-0.02), Vtcn1(-0.02), Jak3(-0.04), Jak3(-0.04), Traf6(-0.04), Coro1a(-0.05), Cd276(-0.07), Cd276(-0.07), Adk(…
positive regulation of leukocyte chemotaxis	0.0189439	0.418723	6.58416e-05	0.000773912	11	0.231148	0.00177569	0.0454722	0.00080189	0.478897	Cxcr2(1.44), Cxcl5(1.43), Ppbp(1.29), Pf4(0.34), F2rl1(0.09), Edn3(0.01), Gpsm3(0.01), Cxcl10(-0.05), Cxcl10(-0.05), Zfp580(-0.24), Cxcl13(-0.39),
histone H4-K16 acetylation	0.037869	0.324435	7.00397e-05	0.000820532	15	0.0673587	0.0670565	0.0104691	0.0182801	0.131051	Kansl2(0.25), Msl1(0.16), Msl1(0.16), Wdr5(0.12), Msl3(0.11), Kansl1(0.11), Kat8(0.1), Kansl3(0.09), Mcrs1(0.08), Phf20(0.08), Msl2(0.07), Msl2(0.07), Hcfc1(0.02), Ogt(-0.07), Kmt2a(-0.07),
positive regulation of pri-miRNA transcription from RNA polymerase II promoter	0.023714	0.295488	7.17044e-05	0.000836235	19	0.275496	0.00558103	0.000690242	0.0342605	0.363964	Fos(0.81), Jun(0.46), Smad1(0.42), Tgfb1(0.26), Pdgfb(0.25), Hif1a(0.24), Nfkb1(0.24), Smad6(0.18), Srf(0.14), Spi1(0.13), Bmp2(0.11), Bmpr1a(0.11), Stat3(0.11), Tert(0.1), Gnl3(0.1), Tead1(-0.01), Smarca4(-0.02), Ctcf(-0.07), Bmp4(-0.15),
ribosomal small subunit assembly	0.0370694	0.290783	7.20851e-05	0.000836235	21	0.0730968	0.0108206	0.0567133	0.0460756	0.06914	Rps17(0.2), Rpsa(0.15), Rps28(0.13), Rrp7a(0.13), Pwp2(0.13), Rps14(0.12), Rps14(0.12), Rps2(0.11), Rps5(0.11), Rps10(0.11), Rps25(0.08), Rps19(0.06), Rps19(0.06), Rps27(0.06), Rps15(0.05), Rps15(0.05), Rps27l(0.04), Mrps7(0.03), Mrps11(-0.08), Eral1(-0.16), Eral1(-0.16),
positive regulation of cell differentiation	0.0260614	0.212148	7.20893e-05	0.000836235	38	0.213613	0.0035264	0.0244703	0.0227368	0.148845	Gdnf(0.72), Clu(0.67), Socs3(0.59), Socs3(0.59), Eomes(0.57), Eomes(0.57), Ctgf(0.55), Junb(0.48), Jun(0.46), Smad1(0.42), Cyr61(0.4), Ppp1r13l(0.38), Map2k1(0.22), Jak2(0.16), Srf(0.14), Btc(0.13), Bmp2(0.11), Wnt9a(0.1), Smad9(0.08), Sox17(0.02), Sox17(0.02), Apc(0.01), Edn3(0.01), Men1(0.01), Pa2g4(0), Ccne1(-0.02), Smarca4(-0.02), Fgf2(-0.03), Bmp7(-0.09), Serpinf2(-0.09), Serpinf2(-0.09), Nf…
positive regulation of tumor necrosis factor production	0.0194172	0.162609	7.33583e-05	0.000848175	65	0.213435	0.000397872	0.15562	0.00375145	0.256472	Ccr7(2.19), Cd14(1.38), Cd14(1.38), Clu(0.67), Fcer1g(0.45), Fcer1g(0.45), Pf4(0.34), Tirap(0.3), Tirap(0.3), Tlr4(0.28), Tlr4(0.28), Il18(0.25), Card9(0.24), Nfatc4(0.21), Ly96(0.2), Myd88(0.18), Myd88(0.18), Jak2(0.16), Zfp64(0.16), Zfp64(0.16), Selk(0.15), Ripk2(0.14), Tnfrsf1a(0.13), Ccr5(0.12), H2-T23(0.12), Ripk1(0.09), Twist1(0.07), Tlr3(0.07), Tlr3(0.07), Hdac1(0.07), Ncl(0.06), Sash3(0.0…
mRNA cap binding complex	0.0344499	0.381706	7.41443e-05	0.00085447	11	0.0213989	0.200408	0.0127477	0.0365291	0.0557668	Fam103a1(0.2), Rnmt(0.2), Rnmt(0.2), Eif4e2(0.17), Eif4e(0.14), Eif4e(0.14), Ago2(0.11), Cyfip1(0.08), Fmr1(-0.02), Ncbp1(-0.06), Ncbp2(-0.08),
nuclear pore outer ring	0.0304981	0.342195	7.75979e-05	0.000891368	15	0.0136803	0.134837	0.0209792	0.0484555	0.0729648	Ahctf1(0.14), Nup85(0.09), Nup85(0.09), Nup43(0.08), Nup43(0.08), Nup160(0.06), Seh1l(0.03), Sec13(0.01), Nup107(0), Nup107(0), Nup133(0), Nup133(0), Nup98(0), Nup37(-0.08), Nup37(-0.08),
histone binding	0.0241649	0.142274	7.81257e-05	0.000894526	101	0.0700205	0.127851	0.00692832	0.00641258	0.186036	Ctsl(0.43), H2afx(0.28), Anp32b(0.23), Rcc1(0.22), Spty2d1(0.22), H3f3b(0.21), Sirt1(0.2), Chd2(0.19), Daxx(0.18), Daxx(0.18), Jak2(0.16), Mysm1(0.16), Smarca5(0.15), Uhrf2(0.15), Dnajc2(0.14), Tbl1xr1(0.14), Pygo2(0.13), Pygo2(0.13), Chaf1b(0.13), Hpf1(0.12), Noc2l(0.11), Noc2l(0.11), Noc2l(0.11), Npm1(0.09), Brd1(0.08), Ipo7(0.08), H3f3a(0.07), Ptma(0.07), Nasp(0.07), Brdt(0.07), Brdt(0.07), Ip…
regulation of mRNA stability	0.0303278	0.265172	7.95197e-05	0.00090755	23	0.120571	0.0190429	0.00267023	0.0564119	0.20409	Carhsp1(0.53), Zfp36(0.41), Zfp36(0.41), Zfp36l1(0.31), Zfp36l1(0.31), Zfp36l1(0.31), Rnasel(0.28), Samd4(0.18), Calcr(0.15), Ythdf2(0.1), Rc3h1(0.09), Pabpc4(0.08), Apex1(0.05), Pum2(0.05), Pcid2(0.03), Hnrnpd(0.02), Brf1(0.02), Zfp36l2(0), Zfp36l2(0), Fmr1(-0.02), Pcbp4(-0.05), Pum1(-0.06), Zc3h14(-0.09),
histone-lysine N-methyltransferase activity	0.0267151	0.257144	8.06806e-05	0.00091784	36	0.00893021	0.151586	0.00608533	0.0393711	0.219727	Ezh2(0.18), Dot1l(0.14), Suv39h1(0.13), Suv39h1(0.13), Suv39h1(0.13), Setd7(0.08), Smyd2(0.08), Whsc1l1(0.08), Ezh1(0.07), Setdb1(0.07), Kmt5b(0.07), Setd3(0.05), Kmt2b(0.05), Kmt5a(0.03), Ehmt1(0.02), Men1(0.01), Men1(0.01), Whsc1(0.01), Nsd1(-0.02), Kmt2d(-0.02), Setd2(-0.03), Setmar(-0.04), Kmt5c(-0.04), Suv39h2(-0.05), Suv39h2(-0.05), Setd1b(-0.05), Kmt2e(-0.07), Kmt2a(-0.07), Ehmt2(-0.08), E…
endopeptidase activity	0.017348	0.155611	8.15543e-05	0.000924805	89	0.255951	0.400593	0.000594994	0.153189	0.000559741	Mmp9(1.42), Mmp3(0.93), Htra4(0.63), Klk1b9(0.4), Psma5(0.34), Ctsd(0.32), Adamts9(0.32), Klk1(0.22), Rhbdd1(0.22), Rce1(0.21), Psen1(0.18), Psen1(0.18), Psen1(0.18), Psma1(0.18), Senp2(0.18), Atg4b(0.17), Casp8(0.16), Casp8(0.16), Psma7(0.16), Ace(0.14), Ctsb(0.14), Psmd14(0.14), Ren1(0.13), Ren1(0.13), Psma6(0.12), Psmb3(0.12), Psmd1(0.12), Klk1b5(0.11), Cd46(0.11), Psma2(0.11), Psmb4(0.11), Ps…
positive regulation of epithelial to mesenchymal transition	0.0277746	0.199053	8.23448e-05	0.000930785	40	0.282156	0.000222955	0.208322	0.0254035	0.0579811	Glipr2(0.68), Rgcc(0.38), Smad3(0.35), Gcnt2(0.34), Gcnt2(0.34), Zfp703(0.29), Ager(0.28), Tgfb1i1(0.28), Tgfbr1(0.27), Tgfb1(0.26), Tgfb1(0.26), Dab2(0.23), Dab2(0.23), Sdcbp(0.2), Ezh2(0.18), Wwtr1(0.17), Smad4(0.13), Bmp2(0.11), Bmp2(0.11), Smad2(0.07), Tgfb3(0.07), Tgfb3(0.07), Twist1(0.07), Twist1(0.07), Hdac2(0.05), Notch1(0.03), Notch1(0.03), Tgfbr2(0.01), Tgfb2(0), Ctnnb1(-0.03), Ctnnb1(-…
DNA-directed RNA polymerase III complex	0.0313335	0.247769	8.36242e-05	0.000942237	28	0.00274671	0.21116	0.037467	0.0242029	0.139445	Crcp(0.23), Polr1d(0.21), Polr2l(0.2), Polr3d(0.15), Polr3d(0.15), Polr2k(0.13), Polr2h(0.12), Polr1c(0.11), Polr1c(0.11), Polr3g(0.09), Polr3g(0.09), Polr2f(0.09), Polr3b(0.09), Polr3b(0.09), Polr3e(0.08), Polr3e(0.08), Polr3h(0.07), Polr3h(0.07), Polr3gl(0.02), Polr3gl(0.02), Polr3f(-0.02), Polr3f(-0.02), Polr3a(-0.03), Polr3a(-0.03), Polr3c(-0.07), Polr3c(-0.07), Polr2e(-0.12), Polr3k(-0.13),
receptor signaling protein serine/threonine kinase activity	0.0278591	0.16374	8.53978e-05	0.000959166	59	0.0981138	0.000396292	0.0652787	0.0698856	0.221118	Pak3(0.85), Map3k8(0.34), Map4k4(0.34), Map3k3(0.28), Tgfbr1(0.27), Grk2(0.26), Map2k1(0.22), Map2k3(0.22), Oxsr1(0.21), Map2k7(0.2), Coq8b(0.2), Stk3(0.19), Pak2(0.19), Map4k5(0.19), Grk6(0.18), Alpk1(0.18), Map2k4(0.17), Pak4(0.12), Bmpr1a(0.11), Pak1(0.1), Pak6(0.1), Stk24(0.1), Grk3(0.1), Bmpr2(0.09), Grk5(0.09), Acvr1b(0.08), Stk25(0.07), Taok1(0.07), Stk4(0.06), Map2k2(0.04), Slk(0.03), Acv…
ceramide biosynthetic process	0.0246118	0.238869	8.68286e-05	0.000972151	33	0.102867	0.276873	0.0173612	0.0283662	0.00585234	Aloxe3(1.37), Sgms2(0.31), Sgms2(0.31), Cers6(0.2), P2rx7(0.16), Sptlc2(0.16), Sptlc2(0.16), Cers4(0.14), Fam57b(0.13), Cers5(0.11), Cers5(0.11), Samd8(0.09), Samd8(0.09), Samd8(0.09), Samd8(0.09), Degs1(0.06), Gba(0.06), Sptlc1(0.06), Sptlc1(0.06), Cers2(0.05), Sgms1(0.03), Sgms1(0.03), Sgms1(0.03), Sptssa(-0.01), P2rx1(-0.08), Smpd4(-0.08), Smpd1(-0.09), Agk(-0.17), Smpd2(-0.18), Cers3(-0.39), …
ribosomal large subunit assembly	0.038399	0.301924	8.9085e-05	0.000992126	17	0.00301687	0.0471223	0.0710475	0.0813117	0.136247	Rpl11(0.3), Rpl24(0.28), Rpl5(0.26), Rpl12(0.24), Rpl10(0.23), Rpl3l(0.17), Ppan(0.17), Brix1(0.12), Rpl6(0.11), Rpf2(0.09), Rpf1(0.03), Mrpl20(0.02), Rsl24d1(0.02), Rpl3(0), Mrto4(0), Mrpl11(-0.04), Mdn1(-0.1),
translational elongation	0.0358655	0.302508	8.91736e-05	0.000992126	17	0.0288876	0.0352327	0.197862	0.0171358	0.0438158	Abtb1(0.26), Gtpbp1(0.2), Eif5a2(0.18), Rplp2(0.16), Rplp1(0.11), Eef1a1(0.09), Hbs1l(0.09), Eef2(0.06), Eef1b2(0.06), Eif5a(0.02), Eef1d(0.01), Eef1g(0), Efl1(-0.01), Tufm(-0.01), Eef2k(-0.02), Tsfm(-0.02), Gfm1(-0.17),
spliceosomal complex assembly	0.0428364	0.277367	9.07382e-05	0.00100516	20	0.0263499	0.0621274	0.0560591	0.0137567	0.134951	Snrpd1(0.24), Gcfc2(0.18), Zrsr2(0.14), Gemin2(0.14), Lsm4(0.1), Sf3a2(0.09), Txnl4b(0.08), Crnkl1(0.07), Crnkl1(0.07), Sart3(0.06), Sf3b1(0.06), Rbm5(0.06), Ddx39b(0.05), Prpf19(0), Gemin6(-0.01), Srpk2(-0.05), Srpk2(-0.05), Snrpd3(-0.06), Scaf11(-0.07), Txnl4a(-0.09),
retrograde vesicle-mediated transport, Golgi to ER	0.0414479	0.238665	9.09134e-05	0.00100516	32	0.0234433	0.12922	0.103083	0.00835752	0.0553417	Arf5(0.26), Rab6a(0.22), Arf4(0.12), Rab6b(0.11), Atp9b(0.1), Ergic2(0.09), Tmem115(0.07), Scyl1(0.06), Cog3(0.06), Cog3(0.06), Kif1c(0.04), Copb2(0.03), Cope(0.03), Atp9a(-0.01), Rer1(-0.01), Rer1(-0.01), Lman2(-0.02), Copb1(-0.02), Scfd1(-0.02), Arf3(-0.03), Copa(-0.04), Stx18(-0.04), Htt(-0.06), Arcn1(-0.06), Nbas(-0.07), Uvrag(-0.1), Cog4(-0.1), Cog4(-0.1), Dnajc28(-0.13), Gbf1(-0.18), Cog7(-…
transcriptional repressor complex	0.0378	0.178853	9.29489e-05	0.00102446	54	0.201101	0.0569103	0.0258206	0.0166773	0.0311371	Jun(0.46), Mier1(0.3), Tfap4(0.23), Jazf1(0.22), Zbtb16(0.21), Akirin2(0.17), Gps2(0.16), Lin37(0.16), Etv3(0.15), Tbl1xr1(0.14), Rest(0.13), Rest(0.13), Rbbp8(0.11), Skil(0.08), Ctbp1(0.07), Ctbp1(0.07), Ctbp2(0.07), Ywhab(0.07), Hdac1(0.07), Hdac4(0.06), Rcor3(0.06), Hdac2(0.05), Sin3a(0.05), Sin3a(0.05), Ncor2(0.05), Arid4a(0.05), Hdgf(0.04), Hdac3(0.03), Ddx20(0.03), Spen(0.02), Smarce1(0.02)…
negative regulation of angiogenesis	0.015951	0.181485	9.42074e-05	0.00103511	66	0.341905	4.66555e-05	0.0924066	0.00334724	0.501101	Ngp(1.26), Apoh(0.77), Lif(0.73), Adrb2(0.54), Sulf1(0.47), Angpt2(0.46), Epha2(0.43), Rgcc(0.38), Thbs1(0.36), Thbs1(0.36), Thbs1(0.36), Adamts1(0.34), Pf4(0.34), Pde3b(0.28), Ism1(0.25), Rock2(0.23), Gpr4(0.22), Foxc1(0.19), Krit1(0.16), Krit1(0.16), Tcf4(0.15), Stab1(0.14), Pml(0.13), Pml(0.13), Serpinf1(0.13), Serpinf1(0.13), Ccr2(0.12), Hhex(0.1), Sema3e(0.08), Dcn(0.07), Ecscr(0.07), Ecscr(…
feeding behavior	0.0285548	0.358908	9.9919e-05	0.00109447	16	0.0931319	0.00375225	0.00678727	0.11495	0.25714	Gal(1.34), Apln(0.98), Calca(0.84), Npy(0.61), Drd1(0.57), Htr1b(0.29), Hcrtr1(0.2), Adm2(0.14), Bdnf(-0.09), Gigyf2(-0.09), Npy1r(-0.26), Ntrk2(-0.27), Negr1(-0.37), Stra6(-0.51), Cckar(-0.61), Cckar(-0.61),
cell division	0.00576729	0.104351	0.000100772	0.0011004	319	0.0219307	0.197503	0.0384238	0.011354	0.0810485	Ccno(1.03), Ccng2(0.57), Ccnf(0.45), Phf13(0.41), Klhl21(0.39), Kif23(0.36), Hmga2(0.34), Nedd1(0.32), Zwint(0.31), Ctdp1(0.31), Reep4(0.31), Mis18a(0.3), Nek2(0.26), Arl8a(0.26), Ppp2r2d(0.25), Haus8(0.25), Cenpt(0.24), Sycp3(0.23), Sycp2(0.23), Nde1(0.22), Rcc1(0.22), Lig4(0.22), Bub1b(0.21), Snx18(0.21), Mis12(0.2), Lats2(0.19), Sdccag3(0.19), Katnb1(0.19), Ccnt1(0.18), Ube2i(0.18), Cntrl(0.18…
trophoblast giant cell differentiation	0.0353131	0.334119	0.000102741	0.00111629	14	0.101016	0.00757152	0.0212388	0.0135226	0.360812	Lif(0.73), Socs3(0.59), Socs3(0.59), Plk4(0.52), Prdm1(0.43), Mdfi(0.36), Itgav(0.19), Senp2(0.18), Gjb5(0.12), Erf(-0.02), Hectd1(-0.02), E2f7(-0.06), Nr2f2(-0.15), Snai1(-0.27),
protein-cysteine S-palmitoyltransferase activity	0.0373596	0.259022	0.000102858	0.00111629	23	0.0280597	0.379777	0.00483124	0.070708	0.0214002	Zdhhc18(0.32), Zdhhc2(0.27), Zdhhc13(0.25), Zdhhc20(0.22), Zdhhc14(0.19), Zdhhc8(0.17), Golga7(0.16), Ykt6(0.11), Ykt6(0.11), Zdhhc12(0.11), Zdhhc16(0.1), Zdhhc21(0.05), Zdhhc3(0.03), Zdhhc4(0.01), Zdhhc15(0), Zdhhc17(-0.01), Zdhhc7(-0.02), Zdhhc6(-0.03), Zdhhc24(-0.03), Zdhhc1(-0.05), Zdhhc5(-0.06), Zdhhc9(-0.07), Zdhhc23(-0.14),
dendritic spine development	0.0335845	0.271687	0.000104342	0.00112894	21	0.0194791	0.0078657	0.0786151	0.0188014	0.375012	Pak3(0.85), Slc12a5(0.61), Acsl4(0.33), Pak2(0.19), Git1(0.15), Arf4(0.12), Arf4(0.12), Pak4(0.12), Pak1(0.1), Uba6(0.1), Nck2(0.08), Spire1(0.06), Srgap2(0.03), Srgap2(0.03), Ephb3(0.01), Fmr1(-0.02), Slc9a6(-0.06), Ephb2(-0.07), Ephb1(-0.15), Ephb1(-0.15), Arid1b(-0.16),
negative regulation of epidermal growth factor-activated receptor activity	0.0255186	0.373878	0.000105201	0.00113237	12	0.071199	0.141103	0.0132502	0.0139897	0.0919869	Gprc5a(0.5), Cblb(0.29), Errfi1(0.27), Errfi1(0.27), Socs5(0.25), Psen1(0.18), Socs4(0.13), Cblc(0.04), Cblc(0.04), Psen2(0.03), Cbl(0.02), Zgpat(-0.06),
tau protein binding	0.0428267	0.329986	0.0001053	0.00113237	14	0.107175	0.0109046	0.0325858	0.0959335	0.0545517	Hsp90aa1(0.65), Ppp2r2a(0.31), Bin1(0.26), Bin1(0.26), Sgk1(0.14), Ppp2ca(0.12), Dyrk1a(0.11), Gsk3b(0.08), Aatf(0.07), Hdac6(0.06), Snca(0.05), Apbb1(0.03), Fkbp4(0.02), Apoe(-0.01),
positive regulation of RNA polymerase II transcriptional preinitiation complex assembly	0.0379731	0.373355	0.000106252	0.00113915	11	0.0274813	0.0798924	0.00605642	0.0925954	0.130739	Gtf2f2(0.24), Ikzf1(0.19), Psmc2(0.1), Creb1(0.09), Psmc1(0.09), Psmc4(0.08), Psmc6(0.07), Ahr(0.06), Psmc3(0.05), Psmc5(0.04), Cand1(-0.01),
negative regulation of mRNA splicing, via spliceosome	0.0297818	0.258775	0.000108678	0.00116164	25	0.0133915	0.0144292	0.100167	0.00878621	0.415407	Celf4(0.39), Ptbp3(0.24), Rnps1(0.21), Srsf7(0.15), Dyrk1a(0.11), Ptbp1(0.1), Ptbp1(0.1), Rbmxl1(0.1), Tra2b(0.1), Npm1(0.09), Srsf10(0.07), Srsf10(0.07), Srsf6(0.07), Srsf4(0.04), Sfswap(0.03), Acin1(0.02), U2af2(0.01), Hnrnpl(-0.01), Hnrnpa2b1(-0.03), Hnrnpa2b1(-0.03), Srsf9(-0.03), Hnrnpk(-0.04), Pcbp4(-0.05), C1qbp(-0.13), Rbm10(-0.15),
cytosolic proteasome complex	0.0360472	0.37955	0.000110464	0.00117717	13	0.00297588	0.100155	0.0220909	0.127347	0.140716	Psmd14(0.14), Psmc2(0.1), Psmc1(0.09), Psmc4(0.08), Psmc4(0.08), Psmc6(0.07), Psmc6(0.07), Psmc3(0.05), Psmc5(0.04), Psmc5(0.04), Uchl5(0.01), Ubqln4(-0.01), Ide(-0.56),
cell chemotaxis	0.0246856	0.193405	0.000113353	0.00120434	45	0.111449	9.92982e-05	0.164003	0.0327615	0.313683	Saa3(2.67), Fpr2(1.55), Fpr1(1.5), Saa1(1.34), Ccl20(0.91), Ccl22(0.73), Ccl6(0.68), Dock4(0.59), Epha2(0.43), Bin2(0.37), Hbegf(0.36), Rhog(0.3), Pdgfb(0.25), Elmo2(0.25), Arrb2(0.21), Hgf(0.16), Pip5k1a(0.16), C5ar2(0.16), Kit(0.12), Lpar1(0.11), Hmgb2(0.09), Hoxb9(0.08), Vegfa(0.06), Ccl25(0.04), Abcc1(0.03), Prkcd(0.02), Bcar1(0), Arhgef16(-0.1), Enpp2(-0.12), Nov(-0.15), Vcam1(-0.15), Ephb1(…
growth	0.0269823	0.257352	0.000117121	0.00124065	24	0.115407	0.00115855	0.037054	0.0279256	0.388356	Inhbb(1.02), Bmp8b(1), Inhba(0.54), Bmp8a(0.44), Sepp1(0.36), Bcl2l1(0.28), Tgfb1(0.26), Lefty1(0.19), Bmp6(0.14), Opa3(0.13), Bmp2(0.11), Rftn1(0.1), Safb(0.09), Tgfb3(0.07), Vegfa(0.06), Vps54(0.05), Tgfb2(0), Bcl2(-0.06), Bmp7(-0.09), Gdf11(-0.11), Bmp4(-0.15), Bmp3(-0.25), Ccnb2(-0.58), Gdf6(-0.66),
adherens junction	0.0316846	0.199411	0.000117783	0.00124393	40	0.134154	0.0827829	0.0199035	0.000787909	0.303837	Cdh5(0.45), Rnd1(0.36), Ceacam2(0.33), Esam(0.28), Cdh1(0.26), Cxadr(0.26), Efna5(0.26), Fam129b(0.23), Itgb1(0.22), Nectin4(0.22), Ahi1(0.19), Wnk3(0.19), Wtip(0.17), Pkp2(0.14), Pkp2(0.14), Vcl(0.11), Shroom3(0.11), Tjp1(0.1), Limd1(0.09), Limd1(0.09), Jag1(0.08), Ctnna1(0.07), Notch1(0.03), Myo1e(0.03), Pard3(-0.01), Ctnnb1(-0.03), Ctnnb1(-0.03), Dll1(-0.03), Tbcd(-0.03), Afdn(-0.05), Magi1(-0…
cellular zinc ion homeostasis	0.0292732	0.283179	0.000120912	0.00127318	20	0.116999	0.0742728	0.039136	0.00385483	0.125496	Mt1(0.77), Mt2(0.6), Slc39a14(0.43), Slc39a14(0.43), Slc39a10(0.34), Slc39a8(0.29), Slc39a6(0.27), Slc39a6(0.27), Mt3(0.22), Mt3(0.22), Slc39a7(0.18), Slc30a5(0.05), Slc39a13(0), Slc39a13(0), Atp13a2(-0.07), Slc30a1(-0.27), Slc30a1(-0.27), Atp7b(-0.28), Slc39a5(-0.34), Slc39a4(-0.47),
telomeric DNA binding	0.038795	0.208465	0.000121638	0.00127356	37	0.0520107	0.10089	0.0613917	0.00626903	0.103352	Pot1b(0.27), Kdm1a(0.27), Terf1(0.16), Terf1(0.16), Smg5(0.16), Smg5(0.16), Tinf2(0.12), Tinf2(0.12), Tert(0.1), Upf3a(0.08), Ctc1(0.07), Ctc1(0.07), Obfc1(0.07), Obfc1(0.07), Smg1(0.07), Ncl(0.06), Upf1(0.06), Ten1(0.06), Upf2(0.03), Hnrnpd(0.02), Terf2(0.02), Terf2(0.02), Pot1a(-0.02), Pot1a(-0.02), Hmbox1(-0.02), Hmbox1(-0.02), Terf2ip(-0.03), Smg7(-0.05), Smg7(-0.05), Smg6(-0.11), Smg6(-0.11)…
skeletal muscle cell differentiation	0.0263864	0.203631	0.000122028	0.00127356	41	0.0293876	0.000486786	0.0313654	0.355703	0.216566	Ankrd2(1), Atf3(0.85), Fos(0.81), Nr4a1(0.77), Maff(0.75), Eomes(0.57), Btg2(0.48), Egr1(0.48), Nupr1(0.39), Sap30(0.28), Cited2(0.27), Ankrd1(0.24), Emd(0.23), Emd(0.23), Plagl1(0.2), Myc(0.18), Gtf3c5(0.17), Hivep3(0.16), Lemd2(0.14), Lemd2(0.14), Mef2d(0.12), Lemd3(0.12), Klf5(0.1), Zfp689(0.09), Bcl9(0.06), Cops2(0.03), Foxn2(0.03), Hmg20b(0.03), Notch1(0.03), Egr2(0.01), Snw1(-0.03), Bcl9l(-…
protein phosphatase 2A binding	0.0435163	0.220663	0.000123085	0.00128081	31	0.0144785	0.0809766	0.0556462	0.0279948	0.13312	Sphk1(0.66), Cttnbp2nl(0.35), Eif4ebp1(0.32), Ppp2r2a(0.31), Smg5(0.16), Ptpn1(0.14), Shc1(0.14), Ppp2ca(0.12), Vim(0.12), Akt1(0.11), Hmgcr(0.11), Trp53(0.08), Igbp1(0.06), Igbp1(0.06), Ppme1(0.06), Strn4(0.06), Ankle2(0.05), Ankle2(0.05), Strn(0.03), Rps6kb1(0), Dab2ip(-0.01), Strn3(-0.01), Smg7(-0.05), Bcl2(-0.06), Cpd(-0.06), Foxo1(-0.06), Ptpa(-0.06), Cacna1c(-0.07), Akap6(-0.17), Mapt(-0.3)…
3'-UTR-mediated mRNA stabilization	0.0388311	0.371342	0.000125914	0.0013064	11	0.0526845	0.0219685	0.0510077	0.0121887	0.253171	Zfp36(0.41), Tirap(0.3), Mapkapk2(0.29), Myd88(0.18), Elavl1(0.13), Hnrnpc(0.11), Hnrnpa0(0.11), Ptbp1(0.1), Angel2(0.07), Tardbp(0.04), Rbm10(-0.15),
calcineurin-NFAT signaling cascade	0.0332748	0.322585	0.000126617	0.00130986	15	0.1846	0.00189033	0.0431672	0.355993	0.0106234	Rcan1(0.27), Rcan1(0.27), Nfatc4(0.21), Nfatc1(0.14), Nfatc1(0.14), Ppp3ca(0.14), Ppp3ca(0.14), Ppp3ca(0.14), Ppp3r1(0.11), Ppp3r1(0.11), Nfatc3(0.05), Ppp3cb(0), Nfatc2(-0.17), Rcan2(-0.29), Rcan2(-0.29),
negative regulation of blood pressure	0.0285202	0.278269	0.000127062	0.00131063	25	0.213812	0.00324201	0.0735518	0.00307017	0.317696	Apln(0.98), Calca(0.84), Calca(0.84), Calca(0.84), Gch1(0.83), Nos3(0.53), Bdkrb2(0.5), Vegfc(0.19), Guca2b(0.16), Adm2(0.14), Gnas(0.03), Nos2(0.03), Gja5(-0.01), Mkks(-0.03), Ptafr(-0.05), Adora1(-0.08), Scpep1(-0.12), Rnpep(-0.12), Rnpep(-0.12), Pik3r1(-0.24), Ppara(-0.32), Abat(-0.33), Nos1(-0.56), Nos1(-0.56), Adipoq(-3.04),
histone H3-K4 methylation	0.037395	0.339592	0.000129342	0.00132577	17	0.0316263	0.278706	0.00791361	0.0126752	0.140854	Setd1a(0.17), Setd1a(0.17), Cxxc1(0.15), Wdr5(0.12), Wdr5(0.12), Kmt2b(0.05), Ash2l(0.04), Ash2l(0.04), Wdr82(0.03), Wdr82(0.03), Rbbp5(-0.01), Rbbp5(-0.01), Kmt2d(-0.02), Kmt2e(-0.07), Kmt2a(-0.07), Dpy30(-0.08), Ash1l(-0.1),
podosome	0.0146057	0.275256	0.000129654	0.00132577	27	0.0876031	0.000323561	0.0959178	0.00190732	0.78724	Adam8(0.42), Adam8(0.42), Tpm4(0.37), Bin2(0.37), Ptpn12(0.31), Tpm3(0.28), Src(0.22), Fscn1(0.18), Sh3pxd2a(0.15), Sh3pxd2a(0.15), Actr3(0.14), Sh3pxd2b(0.14), Vcl(0.11), Cttn(0.08), Fermt3(0.08), Actr2(0.05), Mapk8(0.04), Dbnl(0.03), Arhgef2(0.01), Palld(-0.03), Lpxn(-0.09), Lpxn(-0.09), Gsn(-0.09), Asap1(-0.13), Vcam1(-0.15), Lcp1(-0.16), Kif9(-0.45),
histone acetyltransferase activity	0.0377492	0.187457	0.000134974	0.00137619	52	0.0408926	0.376061	0.0287271	0.0051185	0.0524905	Cdyl(0.31), Taf5l(0.28), Kat6b(0.22), Taf5(0.21), Kat5(0.17), Mgea5(0.15), Kat7(0.15), Epc2(0.15), Taf9(0.14), Taf9(0.14), Epc1(0.13), Epc1(0.13), Tada3(0.12), Tada3(0.12), Kat8(0.1), Sap130(0.1), Sap130(0.1), Crebbp(0.07), Crebbp(0.07), Kat2b(0.07), Kat2b(0.07), Ep300(0.06), Ep300(0.06), Tada1(0.04), Taf10(0.01), Hat1(0), Taf1(-0.01), Taf1(-0.01), Atf2(-0.02), Tada2a(-0.02), Tada2a(-0.02), Gtf3c…
cellular response to peptide hormone stimulus	0.0335205	0.355619	0.000138723	0.00141035	12	0.0263776	0.0863078	0.112679	0.00846311	0.109773	Rela(0.36), Zfp36l1(0.31), Zfp36l1(0.31), Il18(0.25), Nfkb1(0.24), Src(0.22), Xbp1(0.19), Rangap1(0.17), Csk(0.08), Irf1(-0.03), Cav1(-0.12), Gper1(-0.56),
leukotriene biosynthetic process	0.0152024	0.389709	0.00014074	0.00142352	14	0.317448	4.7184e-05	0.173662	0.00170766	0.550148	Alox5(0.77), Alox5(0.77), Alox5(0.77), Syk(0.6), Alox5ap(0.36), Alox5ap(0.36), Alox5ap(0.36), Lta4h(-0.02), Lta4h(-0.02), Ggt1(-0.05), Ltc4s(-0.07), Ltc4s(-0.07), Ggt5(-0.11), Pla2g5(-1.48),
blood vessel morphogenesis	0.0348646	0.215153	0.000140823	0.00142352	33	0.0458233	0.00101086	0.109935	0.04545	0.333885	Edn1(0.76), Syk(0.6), Angpt2(0.46), Epha2(0.43), Thbs1(0.36), Pdgfb(0.25), Pdgfb(0.25), Hif1a(0.24), Flt4(0.23), Gja1(0.23), Flt1(0.19), Col4a1(0.07), Shb(0.07), Shb(0.07), Ahr(0.06), Vegfa(0.06), Vegfa(0.06), Vegfa(0.06), Sos1(0.04), Mkl2(0.02), Fgfr1(-0.03), Itga7(-0.03), Rasa1(-0.04), Efnb2(-0.06), Meis1(-0.07), Amot(-0.08), Serpinf2(-0.09), Cyp1b1(-0.11), Nedd4(-0.11), Nedd4(-0.11), Cdh2(-0.1…
positive regulation of transforming growth factor beta receptor signaling pathway	0.0330631	0.224315	0.00014303	0.00144011	31	0.248322	0.0184953	0.0443219	0.0052226	0.139492	Thbs1(0.36), Thbs1(0.36), Tgfb1i1(0.28), Cdkn2b(0.27), Cited2(0.27), Dab2(0.23), Sdcbp(0.2), Ing2(0.17), Rnf111(0.14), Rnf111(0.14), Axin1(0.13), Axin1(0.13), Axin1(0.13), Smad4(0.13), Myocd(0.11), Stk11(0.08), Stk11(0.08), Lrg1(0.06), Gipc1(0.04), Furin(0.02), Men1(0.01), Hipk2(-0.01), Tgfbr3(-0.03), Tgfbr3(-0.03), Snw1(-0.03), Adam17(-0.1), Flcn(-0.12), Flcn(-0.12), Itga8(-0.29), Itga8(-0.29), …
intercellular bridge	0.0424685	0.193511	0.000143278	0.00144011	40	0.0150623	0.243872	0.0186143	0.0598106	0.0538504	3110043O21Rik(0.4), Ppp1r13l(0.38), Kif23(0.36), Lyrm1(0.32), Tirap(0.3), Eaf1(0.29), Iqcb1(0.29), Sra1(0.23), Usb1(0.22), Snrnp25(0.21), Qsox1(0.19), Rab35(0.18), Rfxank(0.17), Sp4(0.17), Xpa(0.16), Tut1(0.14), Pik3cb(0.13), Trim45(0.1), Dnajc8(0.09), Thoc1(0.09), Prkci(0.06), Pcif1(0.06), BC048403(0.06), Bcl3(0.05), Sin3a(0.05), Tdp2(0.01), Krr1(0), Aamp(0), Thap11(-0.01), Cep131(-0.07), Unc119…
phosphatidylinositol binding	0.022004	0.138109	0.00014716	0.00147494	90	0.166731	0.411623	0.0563416	1.94756e-05	0.114155	Snx10(1.16), Pxdc1(0.84), Tub(0.76), Snx20(0.53), Ncf1(0.48), Ncf1(0.48), Dok7(0.39), Fes(0.33), Dab2(0.23), Hip1r(0.22), Snx1(0.21), Snx1(0.21), Snx18(0.21), Esyt2(0.19), Pld2(0.18), Snx15(0.18), Mitd1(0.17), Ing2(0.17), Snx11(0.16), Snx21(0.16), Sh3pxd2a(0.15), Grb7(0.15), Sh3pxd2b(0.14), Ncf4(0.13), Mtm1(0.09), Pitpna(0.09), Tulp3(0.09), Tulp3(0.09), Zcchc2(0.08), Aida(0.07), Itpr3(0.06), Snx1…
protein C-terminus binding	0.037249	0.094231	0.000148088	0.00148004	182	0.0210877	0.0305831	0.0703448	0.0112302	0.332983	Procr(0.9), Sdcbp2(0.77), Ercc1(0.62), Ctgf(0.55), Atf4(0.45), Ncf2(0.44), Vgll3(0.43), Hpcal4(0.43), Pcgf1(0.39), Mid1ip1(0.34), Bcl10(0.32), Homer3(0.27), Coil(0.26), Ppp2cb(0.26), Bloc1s2(0.26), Optn(0.25), Sdc1(0.24), Dab2(0.23), Src(0.22), Ywhaq(0.22), Map2k1(0.22), Lig4(0.22), Brd4(0.21), Yeats4(0.21), Zbtb16(0.21), Map2k7(0.2), Sdcbp(0.2), Sirt1(0.2), Pias3(0.2), Rabac1(0.19), Yap1(0.19), …
transcription factor TFIID complex	0.0472365	0.23223	0.000149847	0.00149341	29	0.0503004	0.0404498	0.0276524	0.0688981	0.0973694	Ercc1(0.62), Taf4b(0.24), Taf5(0.21), Taf9(0.14), Taf9(0.14), Taf8(0.12), Taf7(0.11), Taf7(0.11), Trp53(0.08), Taf11(0.08), Taf11(0.08), Taf3(0.07), Taf3(0.07), Taf4(0.06), Tbp(0.01), Taf10(0.01), Taf10(0.01), Edf1(-0.01), Taf1(-0.01), Taf1(-0.01), Taf12(-0.03), Taf13(-0.06), Taf13(-0.06), Ercc4(-0.09), Taf2(-0.1), Taf2(-0.1), Taf6(-0.11), Taf9b(-0.13), Taf9b(-0.13),
NLS-bearing protein import into nucleus	0.043223	0.303773	0.000153453	0.00152505	18	0.0152467	0.283393	0.0190556	0.051467	0.0515506	Kpna4(0.22), Kpna2(0.2), Kpna2(0.2), Nup54(0.17), Tnpo2(0.1), Kpna1(0.09), Kpna1(0.09), Kpna3(0.08), Vhl(0.08), Nup35(0.07), Ipo5(0.05), Kpnb1(0.04), Ranbp6(0.03), Tnpo1(0.02), Ranbp2(0.01), Ipo4(-0.1), Dag1(-0.12), Kpna6(-0.16),
positive regulation of viral release from host cell	0.0436966	0.385364	0.000155327	0.00153935	10	0.0380198	0.201735	0.00910895	0.0764093	0.0481133	Chmp2a(0.21), Chmp4b(0.18), Chmp2b(0.17), Chmp4c(0.13), Vps4a(0.12), Vps4b(0.11), Tsg101(0.07), Chmp3(0.06), Ddb1(0.01), Vps37b(-0.01),
cellular response to organic cyclic compound	0.0370222	0.175014	0.000160241	0.00158361	51	0.219436	0.00387773	0.0120138	0.037972	0.28174	P2ry13(1.08), Pak3(0.85), Il1b(0.74), Nfkbia(0.48), Smad1(0.42), Tiparp(0.33), Tgfb1(0.26), Rap1b(0.26), Il18(0.25), Nfkb1(0.24), P2ry12(0.2), Pak2(0.19), Rgs19(0.18), P2rx7(0.16), Rae1(0.15), Hsf1(0.14), Axin1(0.13), Cdkn1b(0.13), Socs1(0.13), Pak4(0.12), Akt1(0.11), Bmp2(0.11), Stat3(0.11), Pak1(0.1), Tmem173(0.1), Tmem173(0.1), Gsk3a(0.1), Smad9(0.08), Slc16a1(0.07), Smad5(0.06), Rap1a(0.05), …
lipopolysaccharide-mediated signaling pathway	0.0274884	0.233188	0.00016117	0.00158836	29	0.124852	0.0196762	0.124412	0.00016384	0.466043	Cd14(1.38), Ptpn22(0.83), Il1b(0.74), Nos3(0.53), Nfkbia(0.48), Tlr4(0.28), Tlr4(0.28), Tlr4(0.28), Tgfb1(0.26), Il18(0.25), Ly96(0.2), Myd88(0.18), Ripk2(0.14), Akt1(0.11), Irak2(0.11), Irak1(0.07), Irak1(0.07), Ccl5(0.03), Mapk3(0.03), Mtdh(0.03), Lyn(0.02), Irf3(-0.01), Mapk1(-0.05), Prkce(-0.07), Ticam1(-0.08), Mapk14(-0.17), Lbp(-0.24), Tnf(-0.26), Stat1(-0.34),
negative regulation of cell death	0.0382527	0.144331	0.000163912	0.00160742	72	0.0436728	0.114644	0.026546	0.0278021	0.101603	Itgb3(0.82), Wnt11(0.8), Sox4(0.67), Ntf5(0.63), Ctgf(0.55), Ctgf(0.55), Rad18(0.47), Npas2(0.34), Npc1(0.3), Adnp2(0.27), Impact(0.24), Rnf4(0.21), Chmp2a(0.21), Sirt1(0.2), Ptges3(0.19), Myc(0.18), Chmp4b(0.18), Jak2(0.16), Tnfaip3(0.15), Ctsb(0.14), Smad4(0.13), Parp16(0.13), Vps4b(0.11), Stat3(0.11), Wnt9a(0.1), Nfe2l2(0.09), Zfpm2(0.09), Txndc12(0.09), Bnip3l(0.08), Atg5(0.07), Cacybp(0.07),…
snoRNA binding	0.0320237	0.272266	0.000164013	0.00160742	24	0.000361367	0.161038	0.18839	0.0629725	0.106193	Rrp9(0.17), Nop58(0.16), Nop58(0.16), Gar1(0.15), Ddx21(0.14), Nop10(0.13), Pwp2(0.13), Nhp2l1(0.12), Imp3(0.11), Wdr3(0.1), Nop56(0.09), Nop56(0.09), Nufip1(0.08), Nufip1(0.08), Heatr1(0.08), Imp4(0), Tbl3(0), Utp6(-0.02), Nudt1(-0.06), Nudt16(-0.08), Nudt5(-0.1), Nudt7(-0.14), Nudt16l1(-0.18), Nudt4(-0.33),
phosphoprotein phosphatase activity	0.0448414	0.109936	0.000168759	0.00164936	124	0.299481	0.00683006	0.0259847	0.0597877	0.0638011	Dusp1(0.83), Ptpn22(0.83), Ppm1j(0.58), Ppp1r3d(0.38), Dusp10(0.36), Dusp8(0.35), Ptpn12(0.31), Ptpn12(0.31), Ctdp1(0.31), Ptpn2(0.3), Dusp5(0.29), Ppp2cb(0.26), Ptpre(0.25), Ptprc(0.24), Dusp7(0.24), Ctdsp2(0.21), Pdp1(0.2), Ptpn23(0.19), Ssh3(0.19), Ppp1r3b(0.18), Eya3(0.17), Ppm1a(0.17), Dusp22(0.17), Ppp4c(0.16), Cdc25a(0.15), Dusp6(0.15), Ppm1f(0.15), Ppp1r12a(0.14), Ppp3ca(0.14), Ppp3ca(0.1…
negative regulation of I-kappaB kinase/NF-kappaB signaling	0.04244	0.185615	0.000171853	0.00167498	43	0.0613627	0.0731889	0.0116675	0.0207154	0.241354	Nlrp12(1.58), Il1rl1(0.52), Per1(0.27), Tle1(0.25), Optn(0.25), Zc3h12a(0.21), Zc3h12a(0.21), Sirt1(0.2), Ppm1a(0.17), Tank(0.17), Nlrc3(0.17), Nlrc3(0.17), Nlrc3(0.17), Casp8(0.16), Rora(0.15), Tnfaip3(0.15), Tnfaip3(0.15), Tnip1(0.14), Tnip1(0.14), Otud7b(0.14), Otud7b(0.14), Ripk1(0.09), Trim59(0.09), Trim59(0.09), Hdac1(0.07), Gstp1(0.06), Ppm1b(0.06), Abl1(0.05), Rhoa(0.02), Dab2ip(-0.01), U…
retinol dehydrogenase activity	0.0419151	0.34402	0.000172964	0.00168117	14	0.0404622	0.0351291	0.00609486	0.296555	0.0800643	Rdh12(1.22), Dhrs9(1.11), Rdh5(0.28), Adh7(0.18), Adh7(0.18), Bmp2(0.11), Rdh10(0.11), Rdh10(0.11), Rdh10(0.11), Adh1(-0.05), Akr1c18(-0.1), Rdh1(-0.38), Rdh16(-0.46), Dhrs3(-0.59),
protein phosphatase type 1 complex	0.0471361	0.36489	0.00017858	0.00172538	11	0.0212789	0.0445679	0.0518672	0.0452577	0.174952	Ppp1r15a(0.63), Ppp1r3b(0.18), Ppp1r2(0.17), Ppp1r11(0.17), Ppp1r15b(0.11), Ppp1r15b(0.11), Shoc2(0.08), Ppp1ca(0.04), Ppp1cb(0.03), Nck1(0.02), 2810408A11Rik(0),
regulation of phagocytosis	0.0262285	0.405546	0.000178859	0.00172538	10	0.0646013	0.000747654	0.20311	0.0122316	0.417469	Syk(0.6), Fgr(0.54), Pot1b(0.27), Itgav(0.19), Itgav(0.19), Hck(0.16), Hck(0.16), Scarb1(0.06), Prkcg(-0.11), Syt7(-0.18),
SMN complex	0.0457099	0.349565	0.000178976	0.00172538	12	0.0182341	0.0995232	0.079132	0.0218868	0.119389	Gemin8(0.19), Gemin8(0.19), Smn1(0.17), Zpr1(0.17), Strap(0.14), Gemin2(0.14), Gemin7(0.14), Ddx20(0.03), Gemin5(0.03), Gemin6(-0.01), Fmr1(-0.02), Fmr1(-0.02),
macroautophagy	0.0448443	0.279156	0.000181119	0.00174131	21	0.141159	0.212265	0.00430023	0.0488343	0.0346331	Optn(0.25), Cln3(0.2), Atg14(0.13), Ulk1(0.1), Ulk1(0.1), Zfyve1(0.08), Atg5(0.07), D17Wsu92e(0.07), Hdac6(0.06), Nbr1(0.06), Nbr1(0.06), Atg7(0.06), Ubqln1(0.04), Becn1(0.03), Becn1(0.03), Pik3c3(0.01), Ei24(-0.03), Pik3r4(-0.03), Trp53inp2(-0.04), Tcirg1(-0.09), Atg3(-0.11),
cell body	0.0432396	0.138388	0.000183687	0.0017612	77	0.0265965	0.00604048	0.107712	0.119403	0.134351	Hspa1b(1.3), Mmp3(0.93), Trpv2(0.62), Glul(0.58), Hspa1l(0.53), Syt11(0.38), Rdh5(0.28), Rps6(0.28), Cxadr(0.26), Ezr(0.23), Gnao1(0.22), Daxx(0.18), Tcp1(0.17), Tubb5(0.17), Casp8(0.16), Sept7(0.15), Cct5(0.14), Cct7(0.14), Gabarapl1(0.14), Gnb1(0.13), Acot7(0.13), Gnb2(0.12), Vim(0.12), Lzts1(0.12), Rdh10(0.11), Ptk2b(0.1), Cct2(0.09), Stau1(0.09), Rack1(0.08), Gsk3b(0.08), Cacybp(0.07), Cct3(0…
endoplasmic reticulum-Golgi intermediate compartment	0.0503757	0.165833	0.000189829	0.00181518	53	0.0264283	0.056073	0.156426	0.0540822	0.0354477	Nucb2(0.43), Tmed5(0.4), Sec22b(0.31), Hspa5(0.3), Hspa5(0.3), Ptpn2(0.3), Surf4(0.19), Pdia6(0.18), Gnpnat1(0.16), Ist1(0.14), Tmed2(0.13), Nat8f1(0.1), Tmed9(0.1), Cln8(0.09), Erp44(0.09), Nucb1(0.08), Serpinh1(0.07), Scyl1(0.06), Tmed1(0.05), Kdelr1(0.05), Rgmb(0.05), Dicer1(0.05), Tmed3(0.03), P4hb(0.02), Man1a(0.01), Ergic1(0.01), Stx17(0.01), Slc35c2(0.01), Slc35c2(0.01), Golga3(0.01), Cnih…
secretory granule	0.038892	0.141388	0.000195414	0.00186354	74	0.115932	0.00789879	0.0611616	0.0109634	0.314303	Gal(1.34), Gal(1.34), Il1b(0.74), Hilpda(0.74), Plat(0.57), Acpp(0.45), Ctsl(0.43), Stx1a(0.42), Scg5(0.4), Ptprn(0.37), Thbs1(0.36), Actn1(0.3), Hspd1(0.28), Hspd1(0.28), Tgfb1(0.26), Stx3(0.21), Cpe(0.18), Cpe(0.18), Vamp3(0.17), Exoc3l(0.17), Lyz2(0.15), Sod1(0.14), Rph3al(0.14), Rab12(0.13), Cdc42(0.12), Rab11fip5(0.12), Rab3b(0.12), Cbarp(0.11), Cbarp(0.11), Itgb2l(0.1), Hgs(0.09), Stxbp5(0.…
microtubule plus-end binding	0.0484195	0.358774	0.00019931	0.00189231	12	0.12011	0.0120202	0.0914553	0.0212389	0.130013	Mapre1(0.11), Clasp2(0.11), Clip2(0.09), Clip2(0.09), Clip1(0.07), Clip1(0.07), Stim1(0.03), Clasp1(0.03), Apc(0.01), Apc(0.01), Kif18a(-0.03), Mlph(-0.07),
toll-like receptor signaling pathway	0.0117956	0.332286	0.0001995	0.00189231	22	0.529777	0.000129239	0.21328	0.00180923	0.263167	Tlr6(0.77), Tlr6(0.77), Mapkapk2(0.29), Tlr4(0.28), Tlr4(0.28), Traf3(0.25), Mapkapk3(0.19), Tlr8(0.19), Tlr8(0.19), Irak2(0.11), Rps6ka3(0.1), Tlr5(0.08), Tlr3(0.07), Tlr3(0.07), Unc93b1(0), Tlr2(-0.01), Tlr7(-0.09), Cd86(-0.13), Tlr1(-0.27), Tlr1(-0.27), Tlr9(-0.41), Tlr9(-0.41),
protein kinase activator activity	0.0500178	0.257964	0.000202057	0.00191144	22	0.145855	0.00917682	0.0458932	0.0454566	0.131273	Wnt11(0.8), Gprc5b(0.44), Rgcc(0.38), Rgcc(0.38), Nkx3-1(0.27), Daxx(0.18), Agap2(0.16), Cab39(0.12), Rplp1(0.11), Stk11(0.08), Stk11(0.08), Stk11(0.08), Taok1(0.07), Nckap1l(0.06), Hmgb1(0.01), Pik3ca(0.01), Tom1l1(-0.03), Rptor(-0.04), Fam58b(-0.05), Strada(-0.07), Prkag2(-0.11), Dusp19(-0.14),
ribosomal protein import into nucleus	0.0413609	0.402939	0.00021177	0.00199798	11	0.0149683	0.31867	0.0930004	0.00371075	0.107508	Tnpo2(0.1), Ipo11(0.07), Ipo9(0.07), Ipo5(0.05), Ipo5(0.05), Kpnb1(0.04), Kpnb1(0.04), Ranbp6(0.03), Tnpo1(0.02), Ipo4(-0.1), Ipo4(-0.1),
polyubiquitin binding	0.0368521	0.247883	0.000212478	0.00199933	27	0.0630058	0.427284	0.00197068	0.144751	0.0130495	Rad18(0.47), Optn(0.25), Tnip2(0.17), Vcp(0.17), Vcp(0.17), Tnip1(0.14), Faap20(0.14), Psmd4(0.12), Zfand6(0.12), Agap3(0.12), Bre(0.09), Eps15(0.08), Sharpin(0.07), Bag6(0.07), Sprtn(0.07), Hdac6(0.06), Ubxn1(0.06), Ubqln1(0.04), Rad23b(-0.01), Ubqln4(-0.01), Brcc3(-0.03), Fam175b(-0.05), Rad23a(-0.12), Agl(-0.17), Agl(-0.17), Fam175a(-0.18), Dzip3(-0.36),
misfolded protein binding	0.0518996	0.331786	0.000229057	0.00214961	13	0.0290323	0.128725	0.0394465	0.109638	0.0342118	Clu(0.67), Sdf2l1(0.31), Hspa5(0.3), Hspa5(0.3), Hspd1(0.28), Dnajb9(0.21), Edem1(0.14), Bag6(0.07), Hdac6(0.06), Dnajc10(0.03), Tor1a(0), Stub1(-0.03), Dnajc3(-0.08),
response to heat	0.0448731	0.206859	0.000234783	0.00219752	34	0.00765735	0.0154789	0.0836872	0.252434	0.116878	Hspa1a(1.78), Hspa1a(1.78), Hspa1b(1.3), Osm(1), Calca(0.84), Trp53inp1(0.66), Trpv2(0.62), Dnaja4(0.57), Gclc(0.28), Tgfb1i1(0.28), Map2k7(0.2), Hspb7(0.19), Eif2b2(0.16), Psip1(0.15), Hsf1(0.14), Hsf1(0.14), Sod1(0.14), Dnaja1(0.11), Eif2b3(0.1), Mapk8(0.04), Eif2b1(-0.01), Eif2b5(-0.01), Lrp11(-0.01), Eif2b4(-0.03), Hspa4(-0.03), Dnaja2(-0.08), Ccl2(-0.17), Hspb2(-0.2), Dnaja3(-0.24), Cpb2(-0.…
retromer complex	0.0359746	0.291788	0.000235439	0.00219784	23	0.0241033	0.477219	0.0622629	0.00174865	0.0917456	Snx1(0.21), Sdccag3(0.19), Trim27(0.12), Dennd5a(0.11), Rab7(0.03), Dctn1(-0.01), Snx3(-0.01), Vps26b(-0.01), Snx6(-0.01), Fam21(-0.03), Ankfy1(-0.04), Snx2(-0.05), Vps29(-0.06), Vps29(-0.06), Snx27(-0.07), Vps26a(-0.08), Vps26a(-0.08), Snx8(-0.09), Dennd4c(-0.1), Snx5(-0.12), Vps35(-0.13), Vps35(-0.13), Tbc1d5(-0.15),
lymphocyte chemotaxis	0.00647444	0.459072	0.000237859	0.00221459	17	0.0388242	1.41695e-05	0.934141	7.88291e-05	0.658827	Ccl20(0.91), Ccl22(0.73), Ccl6(0.68), Adam8(0.42), Ccl9(0.1), Cklf(0.1), Ccl25(0.04), Ccl21a(0.03), Ccl5(0.03), Ccl5(0.03), Cxcl16(0.01), Ccl2(-0.17), Ccl2(-0.17), Ccl11(-0.23), Cx3cl1(-0.32), Ccl7(-0.39), Ccl4(-0.87),
nuclear euchromatin	0.043404	0.23135	0.000242794	0.00225461	27	0.0170672	0.176943	0.0101138	0.288882	0.0303004	Jun(0.46), Cecr2(0.32), Hist1h1c(0.27), Klf4(0.24), Tcf7(0.21), Sirt1(0.2), Myc(0.18), Setd1a(0.17), Ruvbl2(0.16), Prdx1(0.14), Nsmf(0.12), Alkbh1(0.1), Creb1(0.09), Trim28(0.09), Polr2a(0.08), H2afz(0.05), Trim24(0.04), Ash2l(0.04), Tbp(0.01), Smarca4(-0.02), Ctnnb1(-0.03), Ctnnb1(-0.03), Rbmx(-0.05), H1f0(-0.07), Cbx3(-0.09), Nr1h4(-0.13), Ppargc1a(-0.44),
execution phase of apoptosis	0.045038	0.287845	0.000246757	0.00228502	18	0.160547	0.16148	0.0167983	0.00518387	0.130884	Cecr2(0.32), Casp3(0.28), Casp3(0.28), Casp3(0.28), Casp3(0.28), Cflar(0.27), Bbc3(0.22), Casp8(0.16), Akt1(0.11), Stk24(0.1), Taok1(0.07), Madd(0.02), Madd(0.02), Aifm3(0), Cideb(-0.08), Casp7(-0.16), Casp7(-0.16), Cidec(-1.17),
positive regulation of cytokine secretion	0.0437217	0.23627	0.000247361	0.00228502	28	0.054036	0.00477867	0.102474	0.0183839	0.406994	Cd14(1.38), Clec4e(1.01), Syk(0.6), Fgr(0.54), Rgcc(0.38), Cd300c2(0.31), Src(0.22), Tnfsf15(0.19), P2rx7(0.16), Cadm1(0.15), Mif(0.12), Clec4n(0.08), Glmn(0.06), Clec5a(0.04), Panx1(0.03), Casp1(0), Casp1(0), Tlr2(-0.01), Irf3(-0.01), Cd36(-0.02), Ptger4(-0.04), Clec9a(-0.12), C1qtnf3(-0.13), C1qtnf3(-0.13), Tnf(-0.26), Scamp5(-0.26), Agtr1a(-0.31), Agt(-0.42),
apical junction assembly	0.0398476	0.36332	0.000248205	0.00228684	11	0.154073	0.0672988	0.339763	0.00181788	0.0255327	Rhoc(0.37), Rhoc(0.37), Wdr1(0.14), Vcl(0.11), Pkn2(0.11), Pkn2(0.11), Ctnna1(0.07), Fbf1(0.04), Rhoa(0.02), Rhoa(0.02), Cldn19(-0.69),
SCF-dependent proteasomal ubiquitin-dependent protein catabolic process	0.0381607	0.261521	0.000254974	0.00234311	28	0.113174	0.00892977	0.021978	0.0836053	0.21263	Ccnf(0.45), Fbxl2(0.21), Fbxl15(0.2), Wwtr1(0.17), Fbxl3(0.16), Fbxl3(0.16), Cul1(0.09), Cul1(0.09), Fbxo6(0.09), Fbxo6(0.09), Fbxo4(0.07), Fbxl5(0.07), Fbxw11(0.06), Fbxw11(0.06), Rnf7(0.04), Fbxo2(0.04), Rbx1(0.01), Fbxo31(0.01), Fbxo31(0.01), Fbxw7(0), Btrc(-0.02), Skp1a(-0.06), Skp1a(-0.06), Fbxw5(-0.07), Fbxw5(-0.07), Fbxo36(-0.12), Fbxo9(-0.19), Fbxl7(-0.37),
negative regulation of signal transduction	0.041945	0.178507	0.00026003	0.00238339	46	0.0447546	0.00415822	0.319272	0.024772	0.161316	Nlrp12(1.58), Rgs18(1.45), Rgs1(0.71), Socs3(0.59), Ddit4(0.5), Rgs7(0.49), Rgs2(0.42), Socs2(0.38), Rgs16(0.3), Inpp5d(0.29), Socs5(0.25), Erbb3(0.22), Pmepa1(0.22), Arrb2(0.21), Cish(0.2), Ddit4l(0.2), Rgs19(0.18), Pak1ip1(0.16), Socs1(0.13), Socs4(0.13), Socs7(0.13), Gsk3a(0.1), Socs6(0.09), Gsk3b(0.08), Rgs10(0.06), Prr5l(0.06), Ubash3b(0.05), Acvr1(0), Brap(-0.01), Snx13(-0.01), Scai(-0.07),…
nuclear pore complex assembly	0.0385208	0.347003	0.000264722	0.00241839	12	0.0168712	0.166033	0.108604	0.0922089	0.0181074	Rtn4(0.35), Tmem170(0.27), Nup93(0.16), Nup93(0.16), Ahctf1(0.14), Ahctf1(0.14), Nup153(0.03), Nup107(0), Nup98(0), Nup205(-0.03), Tmem33(-0.12), Ndc1(-0.16),
histone methyltransferase activity	0.055604	0.342843	0.000265216	0.00241839	12	0.079424	0.0812087	0.0218059	0.0871032	0.0587692	Ezh2(0.18), Ezh2(0.18), Prmt2(0.17), Dot1l(0.14), Dot1l(0.14), Suv39h1(0.13), Eed(0.05), Carm1(0.02), Carm1(0.02), Prmt6(0.02), Nsd1(-0.02), Suz12(-0.07),
protein K48-linked ubiquitination	0.0296109	0.191585	0.000266493	0.00242379	48	0.254802	0.596044	0.000418354	0.0263427	0.0201491	Ube2t(0.74), Znrf1(0.35), Ube2g2(0.28), Ube2e2(0.28), Ube2d1(0.26), Arih2(0.24), Ube2q2(0.23), Rnf4(0.21), Bfar(0.2), Rffl(0.18), Hace1(0.17), Ube2d3(0.16), Cdc34(0.16), Tnfaip3(0.15), Ube2e1(0.15), Nedd4l(0.14), Ube2b(0.13), Peli1(0.11), Ube2g1(0.1), Ube2g1(0.1), Ube2r2(0.1), Amfr(0.09), Rnf126(0.09), Syvn1(0.08), Topors(0.08), Ube2a(0.07), Ube2h(0.05), Ube2e3(0.03), Rnf115(0.03), Ube2k(0.02), U…
nitric oxide mediated signal transduction	0.0460422	0.359965	0.000275038	0.00249509	11	0.0652775	0.0104538	0.084622	0.0174114	0.337521	Rasd1(0.82), Mt1(0.77), Mt2(0.6), Nos3(0.53), Nos2(0.03), Apoe(-0.01), Cd36(-0.02), Gucy1b3(-0.08), Gucy1a3(-0.14), Nos1(-0.56), Nos1(-0.56),
chromatin DNA binding	0.044447	0.181583	0.000277979	0.00251532	45	0.340153	0.15022	0.00852596	0.00696347	0.0767652	Rela(0.36), Smad3(0.35), Hr(0.3), Grhl1(0.3), Per1(0.27), Hist1h1c(0.27), Jmjd1c(0.27), Ezh2(0.18), Ezh2(0.18), Pitx2(0.17), Ruvbl2(0.16), Nkap(0.15), Srf(0.14), Kdm3a(0.14), Top1(0.13), Stat3(0.11), Kdm6a(0.07), Foxc2(0.06), Foxc2(0.06), Ep300(0.06), Ep300(0.06), Apex1(0.05), Hdac2(0.05), H2afz(0.05), Hdac3(0.03), Notch1(0.03), Wbp2(0.03), H2afy(0.03), Kdm5a(0.03), Rxra(0.01), Mecp2(0), Kdm3b(0)…
regulation of transcription from RNA polymerase II promoter	0.0406218	0.0683349	0.000289702	0.00261471	338	0.135877	0.00964533	0.00866458	0.0667258	0.353716	Nfe2(1.62), Fosb(0.86), Atf3(0.85), Cebpd(0.85), Fos(0.81), Maff(0.75), Eomes(0.57), Mamld1(0.57), Fosl1(0.54), Inhba(0.54), Txk(0.51), Junb(0.48), Relb(0.48), Fosl2(0.46), Zbed4(0.46), Atf4(0.45), Mafk(0.44), Smad1(0.42), Sox9(0.41), Zfp36(0.41), Nupr1(0.39), Sox7(0.38), Cited4(0.38), Tead4(0.36), Smad3(0.35), Ifi204(0.34), Jund(0.34), Nfkbiz(0.34), Elk4(0.33), Batf(0.33), Cebpg(0.32), Brd2(0.3)…
histone H4-K5 acetylation	0.05759	0.295242	0.000302294	0.00271451	16	0.0354224	0.126423	0.0263363	0.0761401	0.0885642	Meaf6(0.26), Kansl2(0.25), Kat7(0.15), Wdr5(0.12), Ing4(0.11), Kansl1(0.11), Kat8(0.1), Kansl3(0.09), Mcrs1(0.08), Phf20(0.08), Phf20(0.08), Hcfc1(0.02), Jade3(0.02), Jade2(-0.04), Ogt(-0.07), Jade1(-0.13),
histone H4-K8 acetylation	0.05759	0.295242	0.000302294	0.00271451	16	0.0354224	0.126423	0.0263363	0.0761401	0.0885642	Meaf6(0.26), Kansl2(0.25), Kat7(0.15), Wdr5(0.12), Ing4(0.11), Kansl1(0.11), Kat8(0.1), Kansl3(0.09), Mcrs1(0.08), Phf20(0.08), Phf20(0.08), Hcfc1(0.02), Jade3(0.02), Jade2(-0.04), Ogt(-0.07), Jade1(-0.13),
cell-cell junction organization	0.0533436	0.241727	0.000306495	0.00274527	24	0.197018	0.0151833	0.0436882	0.0754818	0.067172	Smad3(0.35), Lims2(0.33), Marveld2(0.31), Marveld2(0.31), Rac1(0.3), Cxadr(0.26), Tgfb1(0.26), Gja1(0.23), Ccm2(0.18), Lims1(0.13), Flna(0.08), Tgfb3(0.07), Crb3(0.07), Prkci(0.06), Marveld3(0.03), Marveld3(0.03), Tgfb2(0), Heg1(-0.01), Ocln(-0.05), Cldn6(-0.05), Cldn1(-0.07), Nf2(-0.12), Ceacam1(-0.12), Hnf4a(-0.39),
cyclin/CDK positive transcription elongation factor complex	0.0492061	0.375149	0.000312285	0.00279006	10	0.231978	0.036445	0.00703674	0.158582	0.0477176	Cdk9(0.22), Cdk9(0.22), Cdk9(0.22), Brd4(0.21), Ccnt1(0.18), Ccnt1(0.18), Taf7(0.11), Snw1(-0.03), Ccnt2(-0.03), Rb1(-0.12),
hemostasis	0.0492299	0.250663	0.000315529	0.00281194	33	0.129075	0.0210106	0.0934116	0.0161659	0.154278	Fgb(1.88), Fgg(1.46), F10(1.06), Fga(1.06), Procr(0.9), Thbd(0.9), Kng1(0.89), F13a1(0.32), P2ry12(0.2), Anxa7(0.18), Zfp385a(0.14), F5(0.1), Anxa5(0.04), Pros1(0.04), F3(0.02), Proc(0.02), Enpp4(0.02), F13b(-0.01), F2rl3(-0.09), Tfpi(-0.15), F2r(-0.19), Proz(-0.35), Hrg(-0.37), Serping1(-0.39), F8(-0.41), Tfpi2(-0.46), Serpina10(-0.47), Vwf(-0.51), Vwf(-0.51), Vwf(-0.51), Cpb2(-0.52), Serpinc1(-…
cellular response to tumor necrosis factor	0.0368868	0.163539	0.000316968	0.00281767	61	0.198522	0.000784116	0.318311	0.0125618	0.178968	Acod1(1.34), Il6(1.08), Ccl20(0.91), Dcstamp(0.79), Ccl22(0.73), Ccl6(0.68), Ocstamp(0.63), Birc3(0.44), Zfp36(0.41), Zfp36(0.41), Rela(0.36), Zfp36l1(0.31), Dbn1(0.27), Nfkb1(0.24), Ankrd1(0.24), Ybx3(0.21), Zc3h12a(0.21), Sirt1(0.2), Cactin(0.18), Tank(0.17), Rora(0.15), Actr3(0.14), Zfand6(0.12), Ccl9(0.1), Nfe2l2(0.09), Ripk1(0.09), Birc2(0.08), Gba(0.06), Ccl25(0.04), Fabp4(0.03), Ccl21a(0.0…
activation of JUN kinase activity	0.0513105	0.232098	0.000333921	0.00295353	26	0.0571651	0.0366958	0.0215412	0.0324505	0.355747	Ccr7(2.19), Syk(0.6), Trf(0.37), Tirap(0.3), Dab2(0.23), Map2k7(0.2), Map2k7(0.2), Map2k4(0.17), Ptpn1(0.14), Axin1(0.13), Map3k11(0.12), Ern1(0.12), Ern1(0.12), Mapk8ip3(0.1), Wnt7b(0.04), Zak(0.04), Mul1(0.04), Spag9(0.04), Ercc6(0.03), Mdfic(-0.01), Dab2ip(-0.01), Map4k2(-0.11), Map3k1(-0.18), Fgd4(-0.18), Gab1(-0.19), Wnt5a(-0.27),
microtubule severing	0.054179	0.373246	0.000335967	0.00296422	10	0.0400578	0.114842	0.0139675	0.194366	0.0555721	Katnb1(0.19), Spast(0.16), Spast(0.16), Spast(0.16), Spast(0.16), Ttll11(0.06), Ttll11(0.06), Katna1(0.02), Katna1(0.02), Katnal1(-0.14),
RNA polymerase II regulatory region sequence-specific DNA binding	0.0275458	0.104127	0.000337676	0.00297189	157	0.0823239	0.0289049	0.00153402	0.155225	0.367149	Atf3(0.85), Eomes(0.57), Fosl1(0.54), Cebpb(0.52), Egr1(0.48), Egr1(0.48), Junb(0.48), Fosl2(0.46), Zbed4(0.46), Nfil3(0.4), Rela(0.36), Rela(0.36), Creb3l4(0.36), Smad3(0.35), 9130019O22Rik(0.35), Bcl6b(0.34), Nr4a2(0.32), Runx1(0.28), Nfkb2(0.27), Ebf4(0.27), Nr1d1(0.25), Zfp764(0.25), Dbp(0.24), Dbp(0.24), Nfkb1(0.24), Nfkb1(0.24), Hsf2(0.23), Rel(0.23), Ybx3(0.21), Plagl1(0.2), Atf1(0.19), Fo…
nuclear inclusion body	0.0484197	0.31674	0.000344708	0.00301875	14	0.117695	0.186934	0.00777968	0.0435959	0.083281	Rad18(0.47), Ifi204(0.34), Atxn1(0.17), Atxn1(0.17), Atxn3(0.17), Pabpn1(0.13), Slf1(0.13), Nup153(0.03), Nup98(0), Nxf1(-0.01), Nbn(-0.03), Stub1(-0.03), Tpr(-0.06), Tpr(-0.06),
MAPK cascade	0.0330413	0.173227	0.000349584	0.0030498	59	0.0838431	0.008022	0.0283082	0.00499004	0.755001	Il1b(0.74), Smad1(0.42), Smad1(0.42), Zfp36(0.41), Efna1(0.35), Zfp36l1(0.31), Zfp36l1(0.31), Zfp36l1(0.31), Dok1(0.31), Tgfb1(0.26), Il18(0.25), Map2k1(0.22), Map2k3(0.22), Map2k3(0.22), Slc11a1(0.21), Shank3(0.19), Mapkapk3(0.19), Raf1(0.19), Myc(0.18), Map2k4(0.17), Dok4(0.15), Ptk2(0.14), Shc1(0.14), Map3k5(0.11), Mef2a(0.1), Ptk2b(0.1), Setx(0.1), Itpkb(0.07), Map3k7(0.06), Nphs1(0.06), Map2…
mRNA 3'-UTR binding	0.0486368	0.173494	0.000349977	0.0030498	48	0.112017	0.0793844	0.0117634	0.0135864	0.315444	Carhsp1(0.53), Zfp36(0.41), Zfp36(0.41), Cpeb1(0.34), Zfp36l1(0.31), Mex3d(0.24), Igf2bp2(0.23), Rnps1(0.21), Ybx3(0.21), Zc3h12a(0.21), Fxr1(0.14), Zfp385a(0.14), Tut1(0.14), Elavl1(0.13), Elavl1(0.13), Hnrnpc(0.11), Rc3h1(0.09), Angel2(0.07), Khsrp(0.06), Rnf20(0.06), Larp1(0.05), Secisbp2(0.05), Secisbp2(0.05), Pum2(0.05), Cirbp(0.04), Cryz(0.04), Serbp1(0.04), Tardbp(0.04), Rnf40(0.03), Zfp36…
neuron differentiation	0.0395186	0.148693	0.000351826	0.00305838	78	0.566377	0.0135429	0.00807236	0.112119	0.0279347	Cdk5r1(1.12), Wnt11(0.8), Gdnf(0.72), Ier2(0.57), Cebpb(0.52), Ddit4(0.5), Btg2(0.48), Epha2(0.43), Epha2(0.43), Gas7(0.38), Efna1(0.35), Gfra1(0.34), Acsl4(0.33), Nr4a2(0.32), Hoxc8(0.31), Brsk1(0.3), Casp3(0.28), Runx1(0.28), Adnp2(0.27), Map2k1(0.22), Map2k1(0.22), Pcsk9(0.22), Pcsk9(0.22), Hipk1(0.18), Psen1(0.18), Nrbp2(0.16), Ppp1cc(0.14), Shc1(0.14), Ldb1(0.13), Corin(0.11), Wnt9a(0.1), Ta…
ceramide metabolic process	0.0603085	0.313376	0.000355822	0.00308553	14	0.0712653	0.0471833	0.0536924	0.0625021	0.0992539	Cerk(0.22), Cln3(0.2), Ormdl1(0.19), Col4a3bp(0.15), Ormdl3(0.14), Ormdl2(0.11), Acer3(0.1), Pla2g15(0.1), Pla2g15(0.1), Cln8(0.09), Plpp1(0.08), Sgpl1(0.08), Acer2(0.04), Smpd5(-0.12),
maturation of SSU-rRNA	0.0481085	0.32297	0.000372781	0.00322469	14	0.00366127	0.0240258	0.0801884	0.275811	0.188691	Nob1(0.21), Nob1(0.21), Srfbp1(0.19), Mphosph10(0.18), Rps28(0.13), Nhp2l1(0.12), Utp14a(0.12), Nop14(0.11), Cirh1a(0.1), Rps19(0.06), Nol11(-0.07), Lsm6(-0.07), Tsr3(-0.15), Utp14b(-0.15),
mRNA splice site selection	0.0512768	0.285414	0.000373699	0.00322475	17	0.192817	0.0313033	0.0051007	0.176477	0.0948052	Celf4(0.39), Ptbp2(0.16), Ptbp2(0.16), Luc7l3(0.11), Ythdc1(0.11), Rbmxl1(0.1), Setx(0.1), Luc7l(0.09), Srsf10(0.07), Srsf10(0.07), Srsf6(0.07), Celf1(0.04), Celf2(0.03), Luc7l2(-0.02), Nol3(-0.03), Rbmx(-0.05), Mbnl1(-0.08),
nucleus organization	0.049216	0.298576	0.000378457	0.00324439	17	0.0303559	0.0410505	0.0247666	0.192166	0.139371	Bin1(0.26), H3f3b(0.21), Chmp2a(0.21), Chmp4b(0.18), Chmp2b(0.17), Chmp4c(0.13), Golm1(0.13), Lmna(0.12), Vps4a(0.12), Lemd3(0.12), Vps4b(0.11), Chmp7(0.08), Chmp1a(0.06), Chmp5(-0.03), Map7(-0.1), Chmp6(-0.19), Chek1(-0.47),
cysteine-type endopeptidase inhibitor activity	0.0320019	0.323584	0.000378685	0.00324439	17	0.220849	0.0282299	0.0334187	0.370444	0.00356554	Ngp(1.26), Ctla2b(0.91), Kng1(0.89), Kng1(0.89), Cast(0.33), Cstb(0.24), Wfdc2(0.19), Nlrc4(0.16), Fetub(0.03), Cst3(0.02), Cst3(0.02), Pttg1(-0.06), Kng2(-0.1), Kng2(-0.1), Birc6(-0.21), Birc5(-0.29), Hrg(-0.37),
negative regulation of interleukin-12 production	0.039498	0.322034	0.000378726	0.00324439	14	0.108902	0.000976441	0.201232	0.0166992	0.406462	Mefv(1.34), Irak3(0.72), Irak3(0.72), Thbs1(0.36), Arrb2(0.21), Nlrc3(0.17), Pibf1(0.07), Tlr2(-0.01), Jak3(-0.04), Acp5(-0.09), C1qbp(-0.13), Nod2(-0.14), Nod2(-0.14), Cmklr1(-0.17),
protein catabolic process	0.0494607	0.192882	0.000382651	0.00327009	39	0.0431836	0.307619	0.00764645	0.0451579	0.117439	Mmp3(0.93), Uchl3(0.39), Uchl3(0.39), Cast(0.33), Ctsd(0.32), Siah1a(0.17), Wdyhv1(0.17), Ubr2(0.14), Axin1(0.13), Psmb3(0.12), Akt1(0.11), Psmc2(0.1), Psmc1(0.09), Vhl(0.08), Psmc4(0.08), Syvn1(0.08), Psmc6(0.07), Atg7(0.06), Lrsam1(0.06), Psmc3(0.05), Psmc5(0.04), Trim24(0.04), Trim24(0.04), Rbx1(0.01), Traf2(-0.01), Lnpep(-0.01), Btrc(-0.02), Bace2(-0.03), Cul2(-0.04), Pja1(-0.06), Ubr1(-0.07)…
ephrin receptor binding	0.0426876	0.200318	0.000388679	0.00331361	35	0.408413	0.0331592	0.00642219	0.0111294	0.250487	Cdk5r1(1.12), Efna4(0.39), Efna4(0.39), Efna1(0.35), Efna1(0.35), Efna5(0.26), Efna5(0.26), Src(0.22), Src(0.22), Fyn(0.2), Sdcbp(0.2), Grb2(0.19), Grb2(0.19), Ptpn1(0.14), Shc1(0.14), Shc1(0.14), Pik3cg(0.1), Crk(0.07), Crk(0.07), Efnb1(0.03), Cbl(0.02), Cbl(0.02), Nck1(0.02), Ngef(-0.03), Ngef(-0.03), Chn1(-0.04), Efnb2(-0.06), Efnb2(-0.06), Anks1(-0.11), Cdk5(-0.17), Sipa1l1(-0.17), Aqp1(-0.21…
core promoter sequence-specific DNA binding	0.0511427	0.181849	0.000391053	0.00332583	44	0.0332064	0.0216013	0.0766667	0.325724	0.0380245	Sox4(0.67), Sox4(0.67), Atf4(0.45), Sox9(0.41), Rela(0.36), Ciart(0.3), Ciart(0.3), Nr4a3(0.27), Nr1d1(0.25), Nr1d1(0.25), Arntl(0.23), Nrf1(0.23), Sirt1(0.2), Nfya(0.19), Chd2(0.19), Rora(0.15), Cry1(0.14), Rest(0.13), Top1(0.13), Myocd(0.11), Mta1(0.1), Sp1(0.08), Sp1(0.08), Trp53(0.08), Hdac5(0.06), H2afy(0.03), Prmt5(0.03), Nr1d2(0.03), Nr1d2(0.03), Zfhx3(0.01), Thrap3(0.01), Usp3(-0.01), Klf…
movement of cell or subcellular component	0.0347259	0.277016	0.00040184	0.00340937	21	0.0475245	0.0134362	0.0173936	0.00973421	0.798349	Lypd3(0.62), Cd9(0.36), Pdpn(0.2), Ptk2(0.14), Pxn(0.14), Cfl1(0.11), Strbp(0.11), Myh9(0.1), Pafah1b2(0.1), Wasf2(0.09), Sirpa(0.08), Dstn(0.08), Abi1(0.04), Enah(0.03), Macf1(0.02), Mylip(-0.03), Alox12(-0.05), Abi2(-0.05), Sh2b1(-0.06), Elmo1(-0.14), Elmo1(-0.14),
gene silencing by RNA	0.046897	0.204016	0.000406137	0.00343759	39	0.0275066	0.257795	0.0236615	0.00964625	0.275758	Piwil2(1.27), Ago4(0.37), Pabpc1(0.18), Tarbp2(0.18), Eri1(0.18), Wtip(0.17), Snip1(0.15), Cnot9(0.12), Cnot7(0.11), Cnot11(0.11), Ago2(0.11), Cnot3(0.1), Limd1(0.09), Cnot2(0.09), Cnot8(0.08), Srrt(0.05), Dicer1(0.05), Ajuba(0.03), Adar(0.03), Tnrc6a(0.03), Cnot6(0.02), Zcchc11(0.02), Snd1(-0.01), Xpo5(-0.01), Fmr1(-0.02), Prkra(-0.03), Ncbp1(-0.06), Tnrc6c(-0.07), Cnot6l(-0.07), Ncbp2(-0.08), C…
Rab guanyl-nucleotide exchange factor activity	0.0538368	0.197306	0.000410288	0.00346443	37	0.057439	0.160705	0.0173171	0.013742	0.275602	Rabgef1(0.28), Rab3gap1(0.26), Trappc4(0.24), Dennd6b(0.18), Dennd6b(0.18), Dennd1c(0.15), Sbf1(0.15), Rab3gap2(0.12), Dennd2c(0.12), Dennd5a(0.11), Rgp1(0.11), Rgp1(0.11), St5(0.06), Rin3(0.04), Madd(0.02), Madd(0.02), Als2(0.01), Dennd4a(0.01), Dennd6a(0.01), Dennd6a(0.01), Sbf2(0.01), Ric1(-0.02), Dennd4b(-0.02), Trappc1(-0.02), Dennd5b(-0.02), Dennd1a(-0.03), Dennd1a(-0.03), Dennd1b(-0.07), D…
positive regulation of NF-kappaB import into nucleus	0.0261016	0.321088	0.000413303	0.00348158	17	0.152766	0.000529128	0.388758	0.001945	0.49677	Ptgs2(1.16), Il1b(0.74), Sphk1(0.66), 1810011O10Rik(0.31), Tlr4(0.28), Il18(0.25), Il18r1(0.18), Tlr3(0.07), Eda(0.03), Tlr2(-0.01), Tlr7(-0.09), Rbck1(-0.14), Grem1(-0.18), Prkcq(-0.2), Tnf(-0.26), Tnf(-0.26), Tlr9(-0.41),
protein deacetylase activity	0.0541297	0.303776	0.000418457	0.00351663	18	0.217742	0.0467354	0.0510898	0.0211417	0.0890215	Sirt1(0.2), Sirt1(0.2), Sirt1(0.2), Hdac1(0.07), Hdac5(0.06), Hdac4(0.06), Hdac4(0.06), Hdac2(0.05), Hdac2(0.05), Sin3a(0.05), Hdac3(0.03), Hdac3(0.03), Sirt6(0.03), Sirt2(0.03), Sirt2(0.03), Sirt2(0.03), Hdac10(-0.16), Hdac9(-0.83),
eukaryotic translation initiation factor 2B complex	0.0630197	0.374492	0.000429466	0.00360059	10	0.0472989	0.148643	0.0442083	0.0921836	0.0438334	Eif2b2(0.16), Eif2b2(0.16), Eif2b3(0.1), Eif2s1(0.09), Eif2s1(0.09), Eif2b1(-0.01), Eif2b1(-0.01), Eif2b5(-0.01), Eif2b4(-0.03), Eif2b4(-0.03),
positive regulation of smooth muscle cell proliferation	0.0468038	0.139228	0.000434148	0.00362886	73	0.188521	0.00111132	0.0363837	0.143641	0.259228	Ptgs2(1.16), Il6(1.08), Itgb3(0.82), Edn1(0.76), Ereg(0.71), Ereg(0.71), Hmox1(0.61), S1pr1(0.56), Egr1(0.48), Jun(0.46), Camk2d(0.42), Hbegf(0.36), Ager(0.28), Il6ra(0.28), Nr4a3(0.27), Il18(0.25), Pdgfb(0.25), Pdgfb(0.25), Hif1a(0.24), Egfr(0.23), Myc(0.18), Myd88(0.18), Ptk2(0.14), Shc1(0.14), Zfp143(0.14), Rab5a(0.12), Hmgcr(0.11), Fgfr2(0.08), Gsk3b(0.08), Irak1(0.07), Itga2(0.07), Tgm2(0.07…
histone deacetylation	0.0520821	0.207454	0.000434889	0.00362886	34	0.275377	0.188382	0.0386631	0.00551865	0.0487873	Morf4l2(0.25), Hopx(0.22), Sirt1(0.2), Sirt1(0.2), Sirt1(0.2), Sin3b(0.19), Rbm14(0.17), Tbl1xr1(0.14), Brms1(0.13), Msl3(0.11), Hdac1(0.07), Hdac5(0.06), Hdac6(0.06), Hdac4(0.06), Hdac2(0.05), Hdac2(0.05), Sin3a(0.05), Morf4l1(0.05), Morf4l1(0.05), Baz2a(0.05), Hdac3(0.03), Hdac3(0.03), Sirt2(0.03), Brms1l(0.01), Prdm5(0), Tbl1x(-0.03), Msl3l2(-0.03), Suds3(-0.06), Suds3(-0.06), Hdac8(-0.15), Hd…
negative regulation of extrinsic apoptotic signaling pathway	0.0331867	0.197578	0.000439242	0.00365656	40	0.00960464	0.674598	0.00272846	0.137617	0.046447	Rela(0.36), Rela(0.36), Gclc(0.28), Cflar(0.27), Cflar(0.27), Tgfbr1(0.27), Peli3(0.27), Peli3(0.27), Dab2(0.23), Src(0.22), Src(0.22), Itgav(0.19), Siah2(0.19), Yap1(0.19), Lgals3(0.14), Lmna(0.12), Phip(0.1), Il7(0.09), Ripk1(0.09), Ripk1(0.09), Cttn(0.08), Rb1cc1(0.04), Sgms1(0.03), Park7(0.01), Acvr1(0), Psme3(0), Rps6kb1(0), Prdx2(-0.01), Zmynd11(-0.03), Nol3(-0.03), Sh3rf1(-0.05), Htt(-0.06…
cellular response to nitrogen starvation	0.0508156	0.408894	0.000447135	0.00370823	10	0.158254	0.174118	0.0251693	0.0572864	0.0254021	Map1lc3a(0.22), Map1lc3b(0.16), Gabarapl1(0.14), Atg5(0.07), Gabarap(0.07), Atg7(0.06), Rb1cc1(0.04), Becn1(0.03), Gabarapl2(0.02), Nprl2(-0.04),
protein disulfide isomerase activity	0.042546	0.262647	0.000447545	0.00370823	21	0.0490618	0.256574	0.309518	0.0469161	0.00160655	Itgb3(0.82), Ero1lb(0.64), Qsox1(0.19), Qsox1(0.19), Pdia6(0.18), Tmx4(0.11), Erp44(0.09), Erp44(0.09), Tmx1(0.08), Pdia3(0.07), P4hb(0.02), P4hb(0.02), Pdilt(0.02), Txndc5(0), Ero1l(-0.01), Tmx3(-0.02), Pdia4(-0.03), Pdia4(-0.03), Qsox2(-0.04), Txndc11(-0.08), Pdia5(-0.19),
sensory perception of pain	0.0571917	0.181313	0.000449816	0.00371834	46	0.0485916	0.00914251	0.0758789	0.0681869	0.314591	Tac1(1.42), Aloxe3(1.37), Ptgs2(1.16), Alox5(0.77), Edn1(0.76), Uchl1(0.55), Cacna1a(0.49), Il1rn(0.49), Penk(0.36), Fam134b(0.28), P2ry2(0.26), Ngf(0.25), Ngf(0.25), Prx(0.23), Ptges3(0.19), Nlgn2(0.17), P2rx7(0.16), Ace(0.14), Ccr2(0.12), Pomk(0.09), Ednrb(0.06), Cnr2(0.05), Mapk3(0.03), Ednra(0.02), Mecp2(0), P2rx4(0), Hoxb8(-0.03), Mapk1(-0.05), Ephx2(-0.13), Cdk5(-0.17), P2ry1(-0.18), Chrnb2…
positive regulation of cell growth	0.0605563	0.140175	0.000454404	0.00374751	69	0.0125134	0.0305461	0.10443	0.142416	0.164102	Sphk1(0.66), Krt17(0.59), Slc25a33(0.45), Slc25a33(0.45), Sfrp2(0.38), Hbegf(0.36), Fgfr1op(0.29), Mmp14(0.28), Tgfbr1(0.27), Adnp2(0.27), Sfn(0.26), Ngf(0.25), Egfr(0.23), Flt4(0.23), Sdcbp(0.2), Sdcbp(0.2), Cdkn2aip(0.17), Hdgfrp2(0.15), Psmd10(0.15), Ptk2(0.14), Sgk1(0.14), Taf9(0.14), Ddx3x(0.12), Akt1(0.11), Mtpn(0.11), Ptk2b(0.1), Kdm2b(0.09), Extl3(0.08), Trim32(0.06), Ep300(0.06), Adam10(…
maturation of 5.8S rRNA	0.0571275	0.300558	0.00045654	0.00375637	15	0.00823663	0.115274	0.0699843	0.19005	0.0715928	Las1l(0.28), Nsa2(0.19), Eif6(0.16), Rrp15(0.15), Mak16(0.11), Exosc10(0.09), Mphosph6(0.08), Mphosph6(0.08), Wdr37(0.05), Exosc4(0.04), Rpf1(0.03), Nol9(-0.01), Wdr12(-0.02), Skiv2l2(-0.07), C1d(-0.1),
positive regulation of epithelial cell migration	0.0598799	0.199515	0.000459731	0.00377385	34	0.188839	0.0553203	0.0225673	0.0816511	0.0623247	Tac1(1.42), Glipr2(0.68), Jun(0.46), Sox9(0.41), Sox9(0.41), Sox9(0.41), Itga3(0.26), Hif1a(0.24), Dock5(0.23), Src(0.22), Insl3(0.19), Rab11a(0.18), Gab2(0.16), Ppm1f(0.15), Clasp2(0.11), Pfn1(0.1), Bmpr2(0.09), Plcg1(0.09), Itga2(0.07), Hdac6(0.06), Clasp1(0.03), Tgfbr2(0.01), Capn7(0), Tgfb2(0), Hyal1(-0.02), Ctsh(-0.03), Rab25(-0.04), Prkce(-0.07), Enpp2(-0.12), Dock1(-0.15), Rreb1(-0.17), Aq…
cell growth	0.0585726	0.177423	0.000469243	0.00384301	43	0.0841453	0.0215234	0.147158	0.0138262	0.227885	Il6(1.08), Itgb3(0.82), Edn1(0.76), Rasgrp4(0.66), Il7r(0.56), Cacna1a(0.49), Emp1(0.48), Nupr1(0.39), Il6ra(0.28), Tgfb1(0.26), Socs5(0.25), Lefty1(0.19), Itgav(0.19), Mtpn(0.11), Xrn2(0.1), Fubp1(0.1), Npm1(0.09), Lamtor1(0.08), Brat1(0.08), Brat1(0.08), Atp6v0e(0.07), Tgfb3(0.07), P3h1(0.06), Sec61a1(0.05), Sgms1(0.03), Sgms1(0.03), Prmt6(0.02), Notch2(0), Tgfb2(0), Tgfbr3(-0.03), Rptor(-0.04)…
transcription cofactor activity	0.0499096	0.159657	0.000472303	0.00385914	54	0.168812	0.0820522	0.00207916	0.0517224	0.291477	Ifi204(0.34), Nfkbiz(0.34), Cited2(0.27), Sqstm1(0.23), Sra1(0.23), Cbfb(0.22), Rfxank(0.17), Calcoco1(0.16), Wdr75(0.16), Med4(0.13), Raly(0.12), Zfp212(0.12), Ankra2(0.11), Rad54l2(0.11), Aip(0.08), Crebbp(0.07), Ddx5(0.07), Kat2b(0.07), Pir(0.06), Zfp865(0.06), Ep300(0.06), Med13(0.05), Med12(0.04), Zfp667(0.04), Tfb2m(0.03), Nmi(0.03), Phf21b(0.03), Med17(0.02), Supt20(0.01), Thrap3(0.01), Tr…
astrocyte development	0.0285991	0.340368	0.000488531	0.00398254	14	0.0825391	5.78636e-05	0.332012	0.239871	0.16154	S100a9(1.61), S100a8(1.6), Drd1(0.57), Ager(0.28), Tlr4(0.28), Mt3(0.22), Vim(0.12), Plp1(0.02), Eif2b5(-0.01), Dll1(-0.03), Lamb2(-0.09), Tspan2(-0.22), Tspan2(-0.22), Lamc3(-0.34),
kinetochore	0.00726257	0.164792	0.000494269	0.00402005	114	0.0751875	0.210069	0.043642	0.0167444	0.0994616	Rassf2(0.42), Zwint(0.31), Cenpu(0.3), Nek2(0.26), Meaf6(0.26), Cenpt(0.24), Nde1(0.22), Nde1(0.22), Bub1b(0.21), Bub1b(0.21), Bub1b(0.21), Mis12(0.2), Psen1(0.18), Incenp(0.17), Rangap1(0.17), Mad2l1(0.17), Mad2l1(0.17), Fbxo28(0.17), Anapc16(0.15), Sept7(0.15), Ppp1r12a(0.14), Lrwd1(0.14), Ahctf1(0.14), Sept2(0.13), Dctn2(0.13), Pinx1(0.13), Phf2(0.12), Dsn1(0.12), Cenpo(0.11), Clasp2(0.11), Ka…
negative regulation of microtubule depolymerization	0.0558546	0.253347	0.000509283	0.00412344	21	0.0331316	0.193351	0.0347488	0.0166607	0.241762	Mid1ip1(0.34), Map1b(0.22), Mid1(0.2), Katnb1(0.19), Gas2l1(0.18), Hdgfrp3(0.17), Clasp2(0.11), Clasp2(0.11), Clasp2(0.11), Hdac6(0.06), Specc1l(0.06), Clasp1(0.03), Clasp1(0.03), Eml4(0.02), Apc(0.01), Apc(0.01), Arhgef2(0.01), Cib1(-0.06), Map1a(-0.18), Ckap2(-0.3), Apc2(-0.59),
histone H3 acetylation	0.0544883	0.178323	0.000509311	0.00412344	45	0.0424629	0.287047	0.0533393	0.00613758	0.172595	Sgf29(0.3), Taf5l(0.28), Per1(0.27), Per1(0.27), Ing5(0.16), Brpf1(0.15), Kat7(0.15), Taf9(0.14), Taf9(0.14), Spi1(0.13), Trim16(0.13), Tada3(0.12), Tada3(0.12), Wdr5(0.12), Mbip(0.12), Ing4(0.11), Dr1(0.1), Sap130(0.1), Sap130(0.1), Brpf3(0.09), Brd1(0.08), Kat2b(0.07), Pole4(0.07), Ep300(0.06), Tada1(0.04), Tcf3(0.02), Jade3(0.02), Taf10(0.01), Smarca4(-0.02), Yeats2(-0.02), Tada2a(-0.02), Csrp…
SRP-dependent cotranslational protein targeting to membrane	0.0697719	0.363977	0.000514836	0.00415865	10	0.0532446	0.116389	0.0548229	0.0754605	0.0673342	Srp19(0.21), Srpr(0.12), Srp9(0.1), Sec61a1(0.05), Ssr3(0.02), Sec63(0.01), Sec63(0.01), Srp14(0), Srp68(0), Srp72(-0.06),
negative regulation of fibroblast proliferation	0.061188	0.211099	0.000523397	0.00421817	30	0.100949	0.109746	0.050828	0.0634925	0.0482561	Mmp9(1.42), Trp53inp1(0.66), Pmaip1(0.65), Nupr1(0.39), Fth1(0.3), Emd(0.23), Myc(0.18), Pawr(0.14), B4galt7(0.14), Morc3(0.13), Med31(0.09), Trp53(0.08), Trp53(0.08), Fbxo4(0.07), Gstp1(0.06), Trim32(0.06), Ifi30(0.02), Bax(0.01), Cdc73(0.01), Ski(-0.01), Dab2ip(-0.01), Cd300a(-0.02), Dach1(-0.05), Dach1(-0.05), Med25(-0.05), Nf1(-0.09), Pex2(-0.09), Parp10(-0.11), Sod2(-0.18), Sfrp1(-0.67),
zinc ion transmembrane transporter activity	0.0352404	0.261176	0.000535589	0.00430662	27	0.374723	0.0925411	0.0593168	0.00430269	0.069176	Slc39a14(0.43), Slc39a14(0.43), Slc39a10(0.34), Slc30a4(0.29), Slc30a4(0.29), Slc39a8(0.29), Slc39a6(0.27), Slc39a6(0.27), Slc39a7(0.18), Slc39a1(0.16), Slc30a7(0.13), Slc30a2(0.06), Slc30a2(0.06), Slc30a5(0.05), Slc30a5(0.05), Slc30a5(0.05), Slc39a3(0.04), Slc39a13(0), Slc39a13(0), Slc39a13(0), Slc39a11(-0.05), Slc30a6(-0.2), Slc30a1(-0.27), Slc30a1(-0.27), Slc39a5(-0.34), Slc39a4(-0.47), Slc39a…
negative regulation of protein autophosphorylation	0.0615803	0.342213	0.000542458	0.00435196	12	0.0440633	0.041562	0.030134	0.136726	0.185599	Nlrp12(1.58), Jun(0.46), Mvp(0.3), Errfi1(0.27), Impact(0.24), Impact(0.24), Ptprc(0.24), Chp1(0.2), Eng(-0.09), Gfra2(-0.26), Enpp1(-0.32), Adipoq(-3.04),
positive regulation of DNA replication	0.0435888	0.201115	0.000546367	0.00436882	37	0.318387	0.0132509	0.0760577	0.00491976	0.275135	Il6(1.08), Ereg(0.71), Ereg(0.71), Ereg(0.71), Jun(0.46), Mas1(0.32), Pdgfa(0.31), Rac1(0.3), Pdgfb(0.25), Egfr(0.23), Kctd13(0.23), Tnfaip1(0.2), Atf1(0.19), Map2k4(0.17), Kitl(0.15), Shc1(0.14), Cdc42(0.12), Calr(0.11), Hras(0.1), Npm1(0.09), Cacybp(0.07), Pcna(0.07), Tgfb3(0.07), Ctc1(0.07), Obfc1(0.07), Mapk8(0.04), Cst3(0.02), Met(-0.03), Igf1r(-0.05), Insr(-0.11), Cdk1(-0.17), Pdgfc(-0.17),…
proteasome core complex	0.0469296	0.318616	0.000547029	0.00436882	18	0.116111	0.00429962	0.00645117	0.335404	0.285233	Psma5(0.34), Psma1(0.18), Psma7(0.16), Psma6(0.12), Psmb3(0.12), Psma2(0.11), Psmb4(0.11), Psmb7(0.11), Psmb6(0.06), Psmb1(0.05), Psma4(0.02), Psmb5(0.01), Psmb2(0), Psma3(-0.05), Psma3(-0.05), Psmb8(-0.15), Psmb10(-0.23), Psmb9(-0.75),
protein kinase activity	0.0357585	0.0591849	0.000552511	0.00440267	484	0.119451	0.103009	0.0329805	0.000298311	0.662531	Pak3(0.85), Pak3(0.85), Irak3(0.72), Hipk4(0.65), Pdk4(0.64), Syk(0.6), Fgr(0.54), Plk4(0.52), Txk(0.51), Epha2(0.43), Plk2(0.42), Camk2d(0.42), Rassf2(0.42), Sox9(0.41), Sox9(0.41), Map3k6(0.38), Plk3(0.37), Rps6kl1(0.37), Musk(0.36), Prkx(0.36), Pim3(0.36), Map3k8(0.34), Map4k4(0.34), Fes(0.33), Csnk1e(0.33), Csnk1e(0.33), Csnk1e(0.33), Mapk13(0.31), Mapk6(0.3), Myo3b(0.3), Brsk1(0.3), Clk1(0.2…
Ras protein signal transduction	0.0464355	0.174918	0.000559524	0.00444853	46	0.153591	0.0229555	0.0277753	0.0233259	0.357397	Dok3(0.51), Jun(0.46), Plk2(0.42), Dok1(0.31), Rassf1(0.26), Nras(0.25), Rras2(0.24), Kras(0.23), Kras(0.23), Kras(0.23), Sdcbp(0.2), Cnksr1(0.2), Grb2(0.19), Iqgap3(0.19), Rfxank(0.17), Rala(0.16), Usp28(0.15), Rit1(0.11), Ralb(0.11), Hras(0.1), Hras(0.1), Hras(0.1), Ulk1(0.1), Rsu1(0.09), Trim28(0.09), Plce1(0.07), Setdb1(0.07), Shtn1(0.06), Sos1(0.04), Dnmt1(-0.01), Brap(-0.01), Ksr1(-0.09), N…
protein K63-linked ubiquitination	0.054645	0.205237	0.000565943	0.00448948	37	0.0865752	0.434146	0.00725262	0.0581672	0.0412188	Ube2t(0.74), Ube2e2(0.28), Peli3(0.27), Arih2(0.24), Ube2o(0.23), Rnf4(0.21), Bfar(0.2), Ube2v1(0.18), Ube2v1(0.18), Ube2f(0.18), Ube2b(0.13), Trim27(0.12), Ube2s(0.11), Ube2g1(0.1), Rnf126(0.09), Wwp2(0.08), Ube2e3(0.03), Rnf115(0.03), Rnf168(0.01), Prpf19(0), Ube2v2(0), Traf2(-0.01), Zfp91(-0.02), Hectd1(-0.02), Hectd1(-0.02), Rnf5(-0.03), Stub1(-0.03), Traf6(-0.04), Traf6(-0.04), Trim56(-0.04)…
ER to Golgi transport vesicle	0.0698959	0.247736	0.000571766	0.00452552	23	0.0799844	0.0701459	0.138509	0.0375423	0.0634836	Ier3ip1(0.29), Pcsk9(0.22), Sec24b(0.17), Yipf5(0.07), AI314180(0.07), Ddhd2(0.06), Klhl12(0.05), Klhl12(0.05), Vangl2(0.04), Sec23a(0.03), Golga2(0.02), Stx17(0.01), App(0), Lman2(-0.02), Yipf6(-0.03), Sec23ip(-0.03), Yif1b(-0.04), Lman2l(-0.04), Tex261(-0.07), Sec31a(-0.09), Sec31a(-0.09), Lman1(-0.1), Yif1a(-0.17),
I-SMAD binding	0.0535615	0.330725	0.000605296	0.00476957	13	0.180738	0.0462706	0.0176805	0.0508027	0.183866	Smad1(0.42), Smurf1(0.29), Tgfb1i1(0.28), Tgfbr1(0.27), Smad6(0.18), Axin1(0.13), Axin1(0.13), Axin1(0.13), Smad4(0.13), Smad2(0.07), Smad7(0.02), Ctnnb1(-0.03), Axin2(-0.75),
tRNA binding	0.0432591	0.195542	0.000613036	0.00481983	51	0.00293651	0.408061	0.115322	0.00819454	0.260281	Yrdc(0.34), Trmt10a(0.28), Aarsd1(0.26), Ighmbp2(0.19), Ctu1(0.15), Cars(0.13), Rpl6(0.11), Rps10(0.11), Tert(0.1), Eif2ak4(0.1), Eef1a1(0.09), Ctu2(0.09), Aars(0.09), Aars(0.09), Trnau1ap(0.08), Trmt11(0.07), Fdxacb1(0.07), Rars(0.06), Yars(0.05), Trmt1(0.05), Tyw5(0.04), Mettl1(0.03), Farsa(0.03), Yars2(0.01), Kars(0.01), Thumpd2(0), Nsun2(-0.01), Alkbh8(-0.01), Alkbh8(-0.01), Xpo5(-0.01), Mars…
response to UV	0.066857	0.162174	0.000614804	0.00482301	50	0.10777	0.120959	0.0140808	0.0722109	0.122301	Pmaip1(0.65), Cdkn1a(0.54), Rad18(0.47), Brsk1(0.3), Casp3(0.28), Casp3(0.28), Map2k7(0.2), Cdkn2d(0.19), Rpain(0.19), Xpa(0.16), Pml(0.13), Ube2b(0.13), Tipin(0.09), Trp53(0.08), Trp53(0.08), Usf1(0.08), Ercc8(0.08), Ercc8(0.08), Ube2a(0.07), Sprtn(0.07), Trim32(0.06), Ercc5(0.05), Ercc5(0.05), Usp1(0.05), Cirbp(0.04), Trove2(0.04), Trove2(0.04), Mapk8(0.04), Uaca(0.03), Ercc6(0.03), Ercc6(0.03)…
exonuclease activity	0.0437254	0.212392	0.000622983	0.00487636	43	0.0371204	0.671338	0.0260244	0.00317178	0.114173	Isg20(0.32), Noct(0.24), Pan2(0.2), Eri1(0.18), Polg(0.12), Cnot7(0.11), Xrn2(0.1), Exosc10(0.09), Pde12(0.09), Cnot8(0.08), Rexo1(0.07), Isg20l2(0.07), Apex1(0.05), Rad1(0.05), Mgme1(0.05), Pold1(0.04), Dclre1c(0.04), Aen(0.03), Exd2(0.02), Cnot6(0.02), Dclre1b(0.02), Parn(0.01), Rexo2(0.01), Mre11a(0), Rad9a(0), Exosc3(0), Rexo4(0), Dxo(-0.01), Dis3(-0.02), Dis3l(-0.02), Apex2(-0.03), Dis3l2(-0…
negative regulation of phosphorylation	0.0622474	0.263077	0.000628642	0.00490606	19	0.198807	0.0754375	0.109705	0.112252	0.00643246	Cdkn1a(0.54), Birc3(0.44), Cdkn2b(0.27), Cdkn1c(0.22), Sirt1(0.2), Sirt1(0.2), Cdkn2d(0.19), Prkrip1(0.19), Grb10(0.17), Atxn1(0.17), Cdkn1b(0.13), Atxn7(0.09), Ankle2(0.05), Ankle2(0.05), Dynll1(0.04), Bmp7(-0.09), Bmp4(-0.15), Cdkn2c(-0.21), Stap1(-0.58),
cellular response to hydrogen peroxide	0.0581682	0.180454	0.000630678	0.00490606	41	0.108954	0.139022	0.0245607	0.00988903	0.275726	Il6(1.08), Lcn2(0.84), Rhob(0.39), Rela(0.36), Impact(0.24), Anxa1(0.2), Mapk7(0.2), Sirt1(0.2), Ezh2(0.18), Kdm6b(0.17), Tnfaip3(0.15), Hsf1(0.14), Pcgf2(0.12), Map3k5(0.11), Setx(0.1), Nfe2l2(0.09), Stat6(0.09), Rps3(0.09), Hdac6(0.06), Abl1(0.05), Apex1(0.05), Hdac2(0.05), Zfp277(0.05), Bnip3(0.04), Mapk8(0.04), Fxn(0.03), Prkcd(0.02), Park7(0.01), Park7(0.01), Akr1b3(-0.01), Net1(-0.03), Ppif…
G-protein coupled purinergic nucleotide receptor activity	0.0359899	0.428951	0.000630938	0.00490606	10	0.622656	0.00233943	0.131222	0.0131647	0.0881256	P2ry13(1.08), P2ry13(1.08), P2ry10(1), P2ry2(0.26), P2ry12(0.2), Gpr171(0), Ptafr(-0.05), P2ry1(-0.18), P2ry6(-0.21), P2ry14(-0.58),
positive regulation of alpha-beta T cell differentiation	0.0580199	0.36488	0.000641509	0.00497732	10	0.262358	0.0115904	0.0418168	0.0454988	0.191357	Syk(0.6), Pnp(0.35), Pnp(0.35), Nkap(0.15), Ada(0.13), Itpkb(0.07), Rhoa(0.02), Gli3(-0.03), Gli3(-0.03), Ihh(-0.19),
angiogenesis	0.0086997	0.106676	0.000649114	0.00501433	223	0.0653431	2.19757e-08	0.567605	0.112509	0.798586	Pgf(1.53), Ptgs2(1.16), Esm1(0.94), Cxcl17(0.72), Ereg(0.71), Hmox1(0.61), Syk(0.6), S1pr1(0.56), Ctgf(0.55), Ctgf(0.55), Rasip1(0.54), Nos3(0.53), Angpt2(0.46), Jun(0.46), Jun(0.46), Epha2(0.43), Adam8(0.42), Angptl4(0.42), Tnfrsf12a(0.4), Rhob(0.39), Robo4(0.38), Hbegf(0.36), Prkx(0.36), Prkx(0.36), Efna1(0.35), Rtn4(0.35), Clic4(0.32), Pdgfa(0.31), Pde3b(0.28), Mmp19(0.28), Tgfbr1(0.27), Il18(…
cellular response to amino acid starvation	0.0599083	0.203116	0.000658481	0.00507561	33	0.0447277	0.257255	0.144185	0.0245229	0.035708	Atf3(0.85), Cdkn1a(0.54), Cdkn1a(0.54), Atf4(0.45), Atf4(0.45), Dap(0.26), Dap(0.26), Impact(0.24), Rraga(0.17), Sh3glb1(0.12), Ulk1(0.1), Eif2ak4(0.1), Eif2ak4(0.1), Eif2ak4(0.1), Mios(0.1), Eif2s1(0.09), Wdr59(0.08), Seh1l(0.03), Hnrnpl(-0.01), Rragc(-0.01), Eif2ak3(-0.04), Nprl2(-0.04), Nprl2(-0.04), Gcn1l1(-0.05), Nprl3(-0.06), Nprl3(-0.06), Eif2ak2(-0.06), Wdr24(-0.06), Depdc5(-0.11), Depdc5…
translation repressor activity	0.0667156	0.344272	0.000664936	0.00511423	11	0.130595	0.185713	0.071119	0.0573479	0.0172479	Eif4ebp1(0.32), Eif4ebp1(0.32), Paip2(0.24), Samd4(0.18), Samd4(0.18), Patl1(0.15), Cirbp(0.04), Ireb2(0.01), Fmr1(-0.02), Fmr1(-0.02), Eif4ebp2(-0.13),
thyroid gland development	0.046857	0.2835	0.000668067	0.00512716	19	0.27954	0.0859979	0.00798344	0.0138066	0.270567	Pax8(0.4), Pax8(0.4), Pax8(0.4), Pax8(0.4), Smad3(0.35), Map2k1(0.22), Raf1(0.19), Srf(0.14), Hhex(0.1), Map2k2(0.04), Mapk3(0.03), Braf(0.03), Hoxa5(0.02), Hoxa3(0.01), Hoxa3(0.01), Hoxb3(-0.05), Mapk1(-0.05), Thra(-0.21), Hoxd3(-0.23),
cellular response to glucose starvation	0.0582136	0.220077	0.000670647	0.00513582	30	0.0885717	0.260236	0.00468424	0.0725664	0.130593	Atf4(0.45), Hspa5(0.3), Slc2a1(0.25), Impact(0.24), Asns(0.21), Zc3h12a(0.21), Xbp1(0.19), Atg14(0.13), Sh3glb1(0.12), Nfe2l2(0.09), Trp53(0.08), Higd1a(0.05), Higd1a(0.05), Mybbp1a(0.04), Becn1(0.03), Rrp8(0.03), Rrp8(0.03), Prkaa1(0.02), Pik3c3(0.01), Mtmr3(-0.02), Pick1(-0.03), Pik3r4(-0.03), Eif2ak3(-0.04), Eif2ak3(-0.04), Tbl2(-0.05), Bcl2(-0.06), Cpeb4(-0.17), Nuak2(-0.17), Nuak2(-0.17), Pr…
phosphatidylinositol-3-phosphate binding	0.0556455	0.21974	0.000676145	0.00516444	34	0.144747	0.247321	0.0443359	0.0118215	0.0723791	Snx20(0.53), Wipi1(0.33), Wipi1(0.33), Tecpr1(0.3), Tecpr1(0.3), Wipi2(0.2), Wipi2(0.2), Wdr45b(0.16), Snx21(0.16), Sh3pxd2b(0.14), Ncf4(0.13), Wdr45(0.13), Plekha5(0.12), Bbs5(0.03), Bbs5(0.03), Zfyve26(0.02), Sestd1(0.01), Snx3(-0.01), Snx3(-0.01), Dab2ip(-0.01), Vps36(-0.01), Pard3(-0.01), Snx13(-0.01), Fam21(-0.03), Zfyve19(-0.03), Dennd1a(-0.03), Snx27(-0.07), Snx24(-0.09), Lancl2(-0.09), Sn…
MyD88-dependent toll-like receptor signaling pathway	0.024821	0.330969	0.000677303	0.00516444	16	0.736718	0.00242999	0.0147123	0.0021795	0.518704	Tlr6(0.77), Irak3(0.72), Tlr13(0.54), Hspd1(0.28), Tlr4(0.28), Tlr8(0.19), Myd88(0.18), Myd88(0.18), Tnip1(0.14), Irak2(0.11), Tlr5(0.08), Tlr2(-0.01), Tlr7(-0.09), Tlr1(-0.27), Tlr9(-0.41), Reg3g(-1.14),
innervation	0.052645	0.307127	0.00071385	0.00541522	14	0.171713	0.00453943	0.125064	0.208619	0.0533666	Ntf5(0.63), Sulf1(0.47), Unc13a(0.41), Chd7(0.26), Unc13b(0.23), Serpine2(0.17), Lrig1(0.16), Fbxo45(0.11), Ret(0), Lrig2(0), Prkcg(-0.11), Sulf2(-0.11), Rnf165(-0.23), Gabrb3(-0.32),
protein kinase B binding	0.0625171	0.26937	0.000713908	0.00541522	18	0.161513	0.0209509	0.0353067	0.0510119	0.25305	Ankrd2(1), Ankrd2(1), Bcl10(0.32), Pde3b(0.28), Arrb2(0.21), Sirt1(0.2), Srsf5(0.18), Appl1(0.15), Ppp2ca(0.12), Ccdc88a(0.03), Ccdc88a(0.03), Pink1(0.02), Srsf1(0.02), Bad(-0.04), Cdc37(-0.04), Traf6(-0.04), Rasa1(-0.04), Rara(-0.06),
Swr1 complex	0.0691423	0.360415	0.000714948	0.00541522	10	0.0496246	0.228486	0.0468677	0.0265691	0.129734	Kat5(0.17), Ruvbl2(0.16), Ruvbl2(0.16), Znhit1(0.05), Ep400(0.04), Brd8(0.04), Ruvbl1(0.02), Ruvbl1(0.02), Trrap(0), Ing3(-0.03),
DNA-directed RNA polymerase II, core complex	0.0704328	0.220285	0.000716315	0.00541522	29	0.0870897	0.0350592	0.130045	0.0543415	0.109683	Brd4(0.21), Polr2l(0.2), Polr2l(0.2), Polr2d(0.15), Polr2d(0.15), Polr2k(0.13), Polr2k(0.13), Polr2h(0.12), Polr2h(0.12), Polr2f(0.09), Polr2f(0.09), Polr2a(0.08), Polr2a(0.08), Polr2c(0.04), Polr2c(0.04), Polr2g(0.03), Polr2g(0.03), Uri1(0), Uri1(0), Polr2j(-0.01), Polr2j(-0.01), Polr2i(-0.09), Polr2i(-0.09), Polr2b(-0.11), Polr2b(-0.11), Polr2e(-0.12), Polr2e(-0.12), Chd6(-0.14), Zfp768(-0.25),
signal recognition particle, endoplasmic reticulum targeting	0.0720519	0.37668	0.000725386	0.00546169	10	0.0338867	0.0944897	0.0548924	0.193897	0.0645662	Srp19(0.21), Srp9(0.1), Srp54b(0.04), Srp14(0), Srp14(0), Srp68(0), Srp68(0), Srp72(-0.06), Srp72(-0.06), Srp72(-0.06),
ESC/E(Z) complex	0.0660289	0.237671	0.000725549	0.00546169	24	0.125314	0.144012	0.173265	0.0210385	0.0265016	Phf1(0.28), Sirt1(0.2), Ezh2(0.18), Ezh2(0.18), Mtf2(0.13), Ezh1(0.07), Ezh1(0.07), Eed(0.05), Eed(0.05), Hdac2(0.05), H2afy(0.03), Rbbp7(0.02), Aebp2(0), Aebp2(0), Rbbp4(0), Rbbp4(0), Trim37(-0.03), Phf19(-0.06), Phf19(-0.06), Suz12(-0.07), Suz12(-0.07), H2afy2(-0.09), Jarid2(-0.33), Jarid2(-0.33),
mitophagy	0.0457227	0.252969	0.000747317	0.00560989	32	0.174594	0.358305	0.00787242	0.0928186	0.0195279	Wipi1(0.33), Map1lc3a(0.22), Map1lc3a(0.22), Atg2a(0.21), Wipi2(0.2), Atg4b(0.17), Atg12(0.17), Wdr45b(0.16), Map1lc3b(0.16), Gabarapl1(0.14), Wdr45(0.13), Atg4a(0.12), Gabarap(0.07), Atg4d(0.07), Atg7(0.06), Atg9a(0.06), Rb1cc1(0.04), Pink1(0.02), Pink1(0.02), Gabarapl2(0.02), Fis1(0), Cisd2(-0.02), Fundc1(-0.04), Fundc1(-0.04), Usp30(-0.06), Fundc2(-0.11), Atg3(-0.11), Fbxo7(-0.11), Atg4c(-0.11…
mitotic metaphase plate congression	0.0517577	0.222942	0.000748516	0.00560989	27	0.0299458	0.131676	0.0278778	0.185763	0.0979294	Kif22(0.53), Chmp2a(0.21), Rab11a(0.18), Chmp4b(0.18), Chmp2b(0.17), Rrs1(0.16), Chmp4c(0.13), Pinx1(0.13), Vps4a(0.12), Vps4b(0.11), Chmp7(0.08), Pibf1(0.07), Cul3(0.06), Cdc23(0.06), Chmp1a(0.06), Kpnb1(0.04), Becn1(0.03), Seh1l(0.03), Chmp5(-0.03), Kif18a(-0.03), Kif18a(-0.03), Zw10(-0.05), Cenpe(-0.1), Cdca8(-0.17), Chmp6(-0.19), Spdl1(-0.35), Psrc1(-0.43),
transmembrane signaling receptor activity	0.0305089	0.177877	0.000749994	0.00560989	72	0.619634	0.000257717	0.160942	0.0185336	0.196245	Celsr3(1.19), Thbd(0.9), Tlr6(0.77), Lyve1(0.75), Il21r(0.73), Nfam1(0.61), Nfam1(0.61), Clec1b(0.52), Adgrg2(0.48), Fcer1g(0.45), Adgrv1(0.44), Sele(0.3), Gpr157(0.29), Tlr4(0.28), Fzd2(0.27), Egfr(0.23), Fzd3(0.21), Fzd5(0.18), Fzd6(0.18), Calcr(0.15), Adgrl2(0.15), Mrc1(0.14), Adgrf5(0.12), Fzd8(0.08), Tlr5(0.08), Pla2r1(0.07), Fcamr(0.07), Tlr3(0.07), Ryk(0.06), Calcrl(0.06), Adgrf1(0.06), Er…
positive regulation of SMAD protein import into nucleus	0.0585121	0.329551	0.000779308	0.00581143	12	0.180033	0.363804	0.0425172	0.0100422	0.0389178	Tgfbr1(0.27), Tgfb1(0.26), Dab2(0.23), Rbpms(0.16), Nup93(0.16), Nup93(0.16), Bmp6(0.14), Smad4(0.13), Bmpr1a(0.11), Tgfb3(0.07), Bmp4(-0.15), Parp1(-0.34),
maturation of LSU-rRNA from tricistronic rRNA transcript (SSU-rRNA, 5.8S rRNA, LSU-rRNA)	0.0551559	0.384667	0.000780223	0.00581143	10	0.0171064	0.135979	0.235991	0.0125483	0.184635	Rpl35(0.21), Gtpbp4(0.16), Rpf2(0.09), Ftsj3(0.08), Pes1(0.08), Pes1(0.08), Rpl7(0.06), Rpl7l1(0.04), Wdr12(-0.02), Bop1(-0.04),
positive regulation of substrate adhesion-dependent cell spreading	0.05693	0.195587	0.000793405	0.00588734	35	0.0183833	0.12877	0.298047	0.0132926	0.136963	Itgb3(0.82), Apoa1(0.51), Rac1(0.3), Dbn1(0.27), S100a10(0.26), Dab2(0.23), Dab2(0.23), Dab2(0.23), Dock5(0.23), Crkl(0.18), Triobp(0.18), Triobp(0.18), Arpc2(0.17), Lims1(0.13), Calr(0.11), Flna(0.08), Crk(0.07), Myadm(0.05), Rac3(0.05), Arhgef7(0.03), Braf(0.03), Carmil1(0.02), Carmil1(0.02), Dnm2(0.01), Net1(-0.03), Cib1(-0.06), Enpp2(-0.12), C1qbp(-0.13), Dock1(-0.15), Rreb1(-0.17), Has2(-0.1…
peptidyl-prolyl cis-trans isomerase activity	0.0586873	0.176365	0.000793743	0.00588734	44	0.0367224	0.15888	0.0756645	0.0045861	0.408117	Ttc9(0.81), Fkbpl(0.23), Fkbp1a(0.19), Fkbp1a(0.19), Ppie(0.17), Ppil4(0.12), Fkbp2(0.1), Ppid(0.1), Ppid(0.1), Ppid(0.1), Ppig(0.1), Ppig(0.1), Ppic(0.09), Ppia(0.08), Ppia(0.08), Cwc27(0.07), Fkbp5(0.06), Fkbp5(0.06), Fkbp7(0.06), Ppih(0.06), Ppih(0.06), Ppil1(0.05), Fkbp11(0.04), Nktr(0.03), Ppil3(0.03), Fkbp4(0.02), Fkbp4(0.02), Ranbp2(0.01), Ppil2(0.01), Ppib(-0.01), Pin1(-0.01), Ppif(-0.03)…
flotillin complex	0.0544898	0.321045	0.000799156	0.00591509	13	0.059559	0.200069	0.209088	0.0113702	0.0581738	Cdh1(0.26), Cdh1(0.26), Flot2(0.21), Flot2(0.21), Flot1(0.15), Flot1(0.15), Ctnnd1(0.09), Coro1c(0.08), Ctnna1(0.07), Cbl(0.02), Ctnnb1(-0.03), Sorbs1(-0.11), Lrp4(-0.49),
positive regulation of type I interferon production	0.0468441	0.292386	0.000803117	0.005932	16	0.0524211	0.00197521	0.211358	0.227444	0.158326	Cd14(1.38), Ptpn22(0.83), Syk(0.6), Trim15(0.57), Zc3hav1(0.27), Myd88(0.18), Tmem173(0.1), Tmem173(0.1), Irak1(0.07), Tlr3(0.07), Irf1(-0.03), Ticam1(-0.08), Mavs(-0.08), Dhx58(-0.2), Plcg2(-0.25), Irf7(-0.29),
intra-Golgi vesicle-mediated transport	0.0684501	0.23667	0.000804924	0.00593296	26	0.145848	0.0617553	0.210505	0.0307623	0.0372257	Rab6a(0.22), Rab33b(0.16), Rab6b(0.11), Cog2(0.1), Cog2(0.1), Vti1b(0.09), Gosr2(0.09), Cog3(0.06), Copb2(0.03), Copb2(0.03), Cope(0.03), Cog1(0.02), Gabarapl2(0.02), Cux1(0.01), Gosr1(0), Copb1(-0.02), Copb1(-0.02), Copa(-0.04), Copz1(-0.04), Trappc10(-0.06), Nsf(-0.08), Cog8(-0.11), Vti1a(-0.12), Cog6(-0.16), Copg2(-0.19), Cog5(-0.21),
transforming growth factor beta receptor binding	0.0587469	0.221873	0.000809997	0.00595794	29	0.319682	0.0083869	0.104976	0.0478527	0.102263	Inhbb(1.02), Bmp8b(1), Gdnf(0.72), Inhba(0.54), Bmp8a(0.44), Smad3(0.35), Tgfb1(0.26), Tgfb1(0.26), Gdf15(0.26), Lefty1(0.19), Fkbp1a(0.19), Bmp6(0.14), Bmp2(0.11), Smurf2(0.09), Smad2(0.07), Tgfb3(0.07), Lrg1(0.06), Tgfb2(0), Tgfbr3(-0.03), Usp15(-0.06), Bmp7(-0.09), Gdf11(-0.11), Bmp4(-0.15), Tgfbrap1(-0.16), Bmp3(-0.25), Bmp1(-0.26), Rasl11b(-0.34), Gdf10(-0.5), Gdf6(-0.66),
axonal fasciculation	0.034069	0.367148	0.000815802	0.00598819	13	0.140268	0.0119736	0.141966	0.00265371	0.560533	Celsr3(1.19), Cdk5r1(1.12), Sema3a(0.71), Rtn4(0.35), Rtn4(0.35), Ephb3(0.01), Ephb2(-0.07), Amigo1(-0.07), Amigo1(-0.07), Ndn(-0.23), Nrp1(-0.23), Wnt5a(-0.27), Sema5a(-0.44),
enzyme regulator activity	0.0505469	0.276469	0.000886323	0.00649236	18	0.0444821	0.246263	0.0314303	0.176716	0.0348077	Dnmt3l(0.26), Dpm2(0.2), Dpm2(0.2), Calm2(0.16), Dcp1a(0.16), Calm1(0.15), Sept2(0.13), Psmd3(0.13), Psmd1(0.12), Rab3gap2(0.12), Psmd2(0.11), Dcp1b(0.1), Prpsap1(-0.02), Brcc3(-0.03), Mtmr9(-0.04), Gclm(-0.07), Rgn(-0.08), Calm3(-0.09),
cysteine-type endopeptidase activity	0.0529252	0.154262	0.000895191	0.00654377	58	0.222173	0.424429	0.0550872	0.00181796	0.0639833	Usp13(0.71), Uchl1(0.55), Ctsl(0.43), Ctsl(0.43), Ctsc(0.34), 4930486L24Rik(0.29), Casp3(0.28), Casp3(0.28), Cflar(0.27), Ctss(0.27), Ctss(0.27), Ctss(0.27), Rce1(0.21), Casp4(0.2), Atg4b(0.17), Atg4b(0.17), Casp8(0.16), Casp8(0.16), Casp8(0.16), Ctsb(0.14), Ctsb(0.14), Casp2(0.13), Atg4a(0.12), Atg4a(0.12), Usp7(0.1), Usp7(0.1), Usp12(0.09), Atg4d(0.07), Atg4d(0.07), Ctsz(0.05), Usp16(0.05), Blm…
response to interleukin-1	0.0718892	0.258448	0.000901217	0.00656071	19	0.0729523	0.160205	0.0463042	0.176799	0.0273309	Irak3(0.72), Rela(0.36), Sele(0.3), Src(0.22), Il1r1(0.18), Myd88(0.18), Taf9(0.14), Ripk2(0.14), Irak2(0.11), Irak1(0.07), Igbp1(0.06), Prkci(0.06), Hdac4(0.06), Snca(0.05), Traf6(-0.04), Ythdc2(-0.05), Tnfrsf11a(-0.1), Aes(-0.11), Prkca(-0.14),
membrane raft	0.0295245	0.0926383	0.000912331	0.00662669	216	0.166954	0.000132893	0.607984	0.00792455	0.413111	Cd14(1.38), Cd14(1.38), Ltb4r1(1.25), Tlr6(0.77), Nfam1(0.61), Mdga1(0.57), Nos3(0.53), Sulf1(0.47), Fcer1g(0.45), Birc3(0.44), Cd55(0.44), Gprc5b(0.44), Gprc5b(0.44), Rap2b(0.42), Cd48(0.41), Emp2(0.37), Emp2(0.37), Sdc4(0.34), Bcl10(0.32), Ctsd(0.32), Ppp2r1b(0.31), Npc1(0.3), Rgs16(0.3), Sele(0.3), Mall(0.3), Cblb(0.29), Cblb(0.29), Casp3(0.28), Hspd1(0.28), Tlr4(0.28), Cflar(0.27), Tgfbr1(0.2…
protein localization to microtubule	0.0686673	0.349553	0.000914208	0.00662669	11	0.0502872	0.292916	0.0545075	0.0479315	0.064953	Mid1(0.2), Diaph1(0.12), Mapre1(0.11), Mapre1(0.11), Cript(0.1), Gsk3b(0.08), Dvl1(0.05), Mid2(0.04), Champ1(-0.02), Champ1(-0.02), Kif20b(-0.18),
negative regulation of protein catabolic process	0.056716	0.206111	0.0009159	0.00662669	31	0.0799205	0.0497614	0.0337429	0.0126445	0.559643	Irak3(0.72), Irak3(0.72), Rela(0.36), Smad3(0.35), Egfr(0.23), Fyn(0.2), Mad2l2(0.18), Serpine2(0.17), Serpine2(0.17), Mad2l1(0.17), Agap2(0.16), Smad4(0.13), Dedd(0.12), Flna(0.08), Snx12(0.06), Nos2(0.03), Sirt2(0.03), Park7(0.01), Pin1(-0.01), Snx3(-0.01), Sf3b3(-0.02), Mdm4(-0.03), Nrg1(-0.05), Azin2(-0.08), Azin2(-0.08), Azin1(-0.1), Prkcg(-0.11), Mycbp2(-0.13), Banp(-0.15), Phb(-0.21), Rilp…
positive regulation of exosomal secretion	0.0601535	0.300902	0.000928615	0.00670498	15	0.0912505	0.0795346	0.0254116	0.0288973	0.356631	Sdc4(0.34), Sdc1(0.24), Chmp2a(0.21), Sdcbp(0.2), Vps4a(0.12), Vps4b(0.11), Hgs(0.09), Tsg101(0.07), Pdcd6ip(0.05), Rab7(0.03), Stam(0), Snf8(-0.03), Atp13a2(-0.07), Atp13a2(-0.07), Smpd3(-0.38),
nuclear inner membrane	0.0649666	0.228635	0.000931936	0.00671525	25	0.257282	0.00680288	0.0965158	0.104625	0.100255	Smad1(0.42), Smad3(0.35), Dpy19l1(0.26), Emd(0.23), Emd(0.23), Sun2(0.22), Sirt1(0.2), Unc50(0.17), Tmem43(0.14), Ern1(0.12), Lemd3(0.12), Lmnb1(0.11), Tra2b(0.1), Dpy19l3(0.06), Lmnb2(0.03), Psen2(0.03), Lbr(0.02), Cav2(0), Tmpo(-0.02), Kcnh1(-0.03), Nrm(-0.09), Tmem120b(-0.12), Ifi27(-0.14), Dpy19l4(-0.16), Itpr1(-0.44),
mRNA polyadenylation	0.0704597	0.226711	0.000940262	0.00676148	30	0.0432006	0.215879	0.0689258	0.058567	0.0808861	Clp1(0.3), Cpsf4(0.15), Tut1(0.14), Pabpn1(0.13), Pcf11(0.11), Fip1l1(0.1), Papolg(0.09), Cpsf2(0.08), Paf1(0.05), Leo1(0.05), Sympk(0.04), Cpsf6(0.04), Ssu72(0.03), Ssu72(0.03), Papola(0.01), Papola(0.01), Cdc73(0.01), Aplp1(0), App(0), Mtpap(0), Cpsf1(-0.03), Cpsf1(-0.03), Ahcyl1(-0.07), Ahcyl1(-0.07), Cstf2(-0.08), Nudt21(-0.11), Cstf2t(-0.12), Zc3h3(-0.41), Zc3h3(-0.41), Cpsf4l(-0.67),
histone H3-K4 demethylation	0.0626836	0.345772	0.000947191	0.00678289	11	0.016742	0.379136	0.0772929	0.0367545	0.0970132	Kdm1a(0.27), Kdm1a(0.27), Kdm1a(0.27), 2410016O06Rik(0.09), Kdm5c(0.08), Kdm5c(0.08), Kdm5b(0.07), Kdm5b(0.07), Kdm5a(0.03), Kdm1b(-0.27), Kdm5d(-0.52),
interleukin-1 receptor binding	0.012571	0.412293	0.000948584	0.00678289	14	0.00759233	0.00148699	0.417669	0.000178191	0.987183	Il1f9(1.34), Il1f6(0.97), Il1f6(0.97), Il1b(0.74), Il1rn(0.49), Il1rn(0.49), Il1rap(0.26), Myd88(0.18), Trip6(0.14), Tlr5(0.08), Irak1(0.07), Irak4(0.05), Tlr9(-0.41), Tlr9(-0.41),
high-density lipoprotein particle	0.0412257	0.330025	0.000948991	0.00678289	18	0.352544	0.0625947	0.186419	0.0241288	0.015133	Saa3(2.67), Saa1(1.34), Apoh(0.77), Apoa1(0.51), Apoa1(0.51), Lcat(0.37), Gpihbp1(0.21), Hdlbp(0.06), Apoe(-0.01), Apoe(-0.01), Apoa2(-0.06), Abca1(-0.11), Gpld1(-0.15), Apom(-0.24), Apom(-0.24), Apoa4(-0.33), Apoa4(-0.33), Saa4(-0.88),
defense response to Gram-negative bacterium	0.0443106	0.265682	0.000959362	0.00684319	25	0.130559	0.00113127	0.32408	0.0855076	0.174884	Mmp7(1.09), Defb19(1.06), Serpine1(0.8), Serpine1(0.8), Tlr4(0.28), Peli3(0.27), Optn(0.25), Slc11a1(0.21), Lyz2(0.15), Adm(0.13), Hmgb2(0.09), Tlr5(0.08), B2m(0.04), Tusc2(0), Drosha(-0.06), Mr1(-0.06), Pycard(-0.08), Naip5(-0.1), Iigp1(-0.21), Lbp(-0.24), Lbp(-0.24), Ssc5d(-0.27), Tlr9(-0.41), Tnfrsf14(-0.52), Il22ra1(-0.77),
negative regulation of proteasomal ubiquitin-dependent protein catabolic process	0.0662354	0.271065	0.000987436	0.00701999	18	0.168922	0.170918	0.0114113	0.0304197	0.195355	Hfe(0.39), Sdcbp(0.2), Taf9(0.14), Mtm1(0.09), Wac(0.09), Tlk2(0.08), Bag6(0.07), Bag5(0.06), N4bp1(0.06), Ubxn1(0.06), Gipc1(0.04), Smarcc1(0.03), Smarcc1(0.03), Park7(0.01), Senp1(0), Ccar2(-0.05), Fhit(-0.11), Clec16a(-0.16),
calcium-dependent protein binding	0.0545019	0.15455	0.000988116	0.00701999	54	0.0464654	0.00529032	0.384728	0.0685501	0.183595	Syn1(1), Tnnc1(0.54), Tnnc1(0.54), Stx1a(0.42), Selp(0.25), S100a11(0.24), Cln3(0.2), Anxa1(0.2), Chp1(0.2), Anxa3(0.19), Anxa7(0.18), Calm2(0.16), Calm1(0.15), Rbm22(0.15), Vps37c(0.15), Pdcd6(0.14), Pdcd6(0.14), Plscr3(0.14), Myo1d(0.14), S100pbp(0.13), Nsmf(0.12), Stx2(0.09), Lrp8(0.09), Anxa2(0.08), Ddx5(0.07), Tsg101(0.07), Anxa4(0.05), Pdcd6ip(0.05), S100a1(0.05), Vamp2(0.05), Wfs1(0.05), R…
DNA-templated transcription, initiation	0.0676452	0.259338	0.00100097	0.00709495	19	0.0848257	0.063249	0.0374668	0.132878	0.1326	Taf4b(0.24), Taf5(0.21), Myc(0.18), Tbpl1(0.16), Tcf4(0.15), Smarca5(0.15), Gtf2b(0.12), Taf7(0.11), Taf4(0.06), Rrn3(0.05), Rsf1(0.03), Brf1(0.02), Tbp(0.01), Taf10(0.01), Taf1(-0.01), Taf12(-0.03), Brf2(-0.09), Taf6(-0.11), Taf9b(-0.13),
positive regulation of DNA binding	0.0597494	0.209821	0.00100268	0.00709495	29	0.232637	0.343482	0.0346238	0.0159343	0.0349802	Mmp9(1.42), Plaur(0.39), Tlr4(0.28), Brd4(0.21), Hipk1(0.18), Myc(0.18), Pitx2(0.17), Txn1(0.17), Jak2(0.16), Calm1(0.15), Myocd(0.11), Hipk3(0.09), Trim28(0.09), Trim28(0.09), Hmgb2(0.09), Hmgb2(0.09), Itga2(0.07), Ep300(0.06), Sirt2(0.03), Hes1(0.01), Nme1(0), Ercc2(-0.01), Hipk2(-0.01), Ski(-0.01), Edf1(-0.01), Smarca4(-0.02), Park2(-0.42), Egf(-0.47), Igf1(-0.87),
SMAD binding	0.0654406	0.161538	0.00102889	0.00726082	53	0.187465	0.0329045	0.0393683	0.0767706	0.16383	Smad3(0.35), Cited2(0.27), Tgfbr1(0.27), Tgfbr1(0.27), Dab2(0.23), Fkbp1a(0.19), Col5a2(0.17), Rnf111(0.14), Axin1(0.13), Smad4(0.13), Pml(0.13), Bmp2(0.11), Bmpr1a(0.11), Purb(0.11), Mef2a(0.1), Smurf2(0.09), Acvr1b(0.08), Skil(0.08), Yy1(0.08), Flna(0.08), Ipo7(0.08), Crebbp(0.07), Smad2(0.07), Smad2(0.07), Ep300(0.06), Eid2(0.06), Tcf12(0.04), Runx3(0.02), Zfyve9(0.02), Pura(0.01), Tgfbr2(0.01…
cell-matrix adhesion	0.0386482	0.179784	0.00103022	0.00726082	77	0.257943	0.00053451	0.386577	0.0215078	0.255604	Fgb(1.88), Fgg(1.46), Fga(1.06), Itgb3(0.82), Itgb3(0.82), Lypd3(0.62), Lypd3(0.62), Ctgf(0.55), Adam8(0.42), Col13a1(0.41), Epdr1(0.41), Emp2(0.37), Itga2b(0.23), Itgb1(0.22), Itgb1(0.22), Itgb1(0.22), Fermt2(0.21), Fermt2(0.21), Zyx(0.2), Itgav(0.19), Itgav(0.19), Itgb2(0.16), Pxn(0.14), Srf(0.14), Lims1(0.13), Itga10(0.09), Adam9(0.08), Sirpa(0.08), Bcl2l11(0.07), Itga2(0.07), Cd63(0.06), Angp…
histone methyltransferase complex	0.059024	0.25816	0.00103814	0.00730206	30	0.0728207	0.3009	0.0134099	0.0103722	0.351444	Prdm4(0.24), Setd1a(0.17), Setd1a(0.17), Cxxc1(0.15), Wdr5(0.12), Kdm6a(0.07), Kdm6a(0.07), Kmt2b(0.05), Ash2l(0.04), Ash2l(0.04), Prmt5(0.03), Prmt5(0.03), Wdr82(0.03), Men1(0.01), Men1(0.01), Ncoa6(0.01), Ncoa6(0.01), Rbbp5(-0.01), Nsd1(-0.02), Kmt2d(-0.02), Zfp335(-0.04), Zfp335(-0.04), Paxip1(-0.06), Kmt2a(-0.07), Dpy30(-0.08), Cbx5(-0.1), Kmt2c(-0.12), Hoxb5os(-0.19), Jarid2(-0.33), Hdac9(-0…
protein monoubiquitination	0.0638096	0.200598	0.00108232	0.0075977	33	0.0822537	0.185757	0.00261111	0.247957	0.135748	Ube2t(0.74), Rad18(0.47), Ube2o(0.23), Fbxl2(0.21), Fbxl2(0.21), Ube2d3(0.16), Nedd4l(0.14), Ube2b(0.13), Ube2r2(0.1), Cul1(0.09), Rnf126(0.09), Topors(0.08), Tsg101(0.07), Cul3(0.06), Ube2w(0.05), Ube2w(0.05), Ube2w(0.05), Klhl12(0.05), Klhl12(0.05), Trim25(0.03), Ube4b(0.02), Pex12(0.02), Rbx1(0.01), Klhl22(0), Klhl22(0), Fancl(-0.01), Huwe1(-0.02), Mgrn1(-0.1), Nedd4(-0.11), Trim21(-0.13), Neu…
transcription regulatory region sequence-specific DNA binding	0.0599259	0.163183	0.00109079	0.00764199	48	0.23582	0.00526942	0.0679923	0.347801	0.0452818	Nfe2(1.62), Atf3(0.85), Sox4(0.67), Egr1(0.48), Mafk(0.44), Sox9(0.41), Sox9(0.41), Hr(0.3), Ciart(0.3), Nkx3-1(0.27), Per1(0.27), Jmjd1c(0.27), Nr1d1(0.25), Cry2(0.24), Nfkb1(0.24), Arntl(0.23), Tfap2a(0.18), Pitx2(0.17), Kdm3a(0.14), Pou2f1(0.13), Suv39h1(0.13), Bahd1(0.1), Nfe2l2(0.09), Tal1(0.09), Atf6(0.09), Hdac1(0.07), Ddit3(0.05), Sin3a(0.05), Sfpq(0.02), Mkl1(0.01), Foxj1(0), Kdm3b(0), B…
vacuolar transport	0.0516647	0.304377	0.00110044	0.00769439	15	0.395371	0.0496065	0.136412	0.0370513	0.0202034	Chmp2a(0.21), Cln3(0.2), Chmp4b(0.18), Chmp2b(0.17), Ndfip2(0.14), Chmp4c(0.13), Chmp7(0.08), Ndfip1(0.07), Chmp3(0.06), Chmp1a(0.06), 2610002M06Rik(0.02), Atp6v0d1(0.01), Chmp5(-0.03), Chmp6(-0.19), Atp6v0d2(-0.28),
activation of cysteine-type endopeptidase activity involved in apoptotic process	0.0526332	0.142031	0.00110797	0.00773173	65	0.0679578	0.00126232	0.419613	0.18847	0.106821	S100a9(1.61), S100a8(1.6), Pmaip1(0.65), Smad3(0.35), Apaf1(0.34), Apaf1(0.34), Apaf1(0.34), Bcl10(0.32), Hspd1(0.28), Nkx3-1(0.27), Xdh(0.27), Dap(0.26), Bbc3(0.22), Tnfsf15(0.19), Myc(0.18), Vcp(0.17), Casp8(0.16), Jak2(0.16), Nlrc4(0.16), Pdcd6(0.14), Cdkn1b(0.13), Pml(0.13), Nlrp3(0.11), Rack1(0.08), Casp8ap2(0.08), Casp8ap2(0.08), Bak1(0.07), Bak1(0.07), Snca(0.05), Ift57(0.05), Rnf7(0.04), …
vesicle docking	0.0730448	0.270573	0.00111252	0.00773946	17	0.134499	0.130444	0.141049	0.117053	0.00954641	Stx1a(0.42), Stx11(0.29), Stx3(0.21), Cep83(0.15), Stx12(0.13), Stx5a(0.11), Exoc5(0.11), Stx6(0.1), Stx2(0.09), Stx4a(0.07), Stx8(0.05), Stx17(0.01), Cav2(0), Cav2(0), Stx16(-0.05), Stx7(-0.13), Ndrg4(-0.33),
U1 snRNP	0.0505836	0.242897	0.00111345	0.00773946	27	0.000942264	0.279866	0.406497	0.0261908	0.165862	Snrpd1(0.24), Snrpd1(0.24), Snrpb(0.13), Snrpb(0.13), Luc7l3(0.11), Snrpe(0.1), Snrpe(0.1), Prpf39(0.1), Luc7l(0.09), Snrpf(0.09), Snrpf(0.09), Snrnp70(0.03), Snrnp70(0.03), Snrpa(0.03), Snrpd2(0.02), Snrpd2(0.02), Snrpc(0.01), Snrpc(0.01), Prpf40b(0.01), Prpf40a(-0.01), Luc7l2(-0.02), Snrpd3(-0.06), Snrpd3(-0.06), Snrpn(-0.23), Snrpn(-0.23), Snrpg(-0.24), Snrpg(-0.24),
vascular endothelial growth factor receptor signaling pathway	0.061581	0.214712	0.00112539	0.00780709	29	0.0364954	0.0238943	0.133076	0.0194911	0.546704	Pgf(1.53), Sulf1(0.47), Mapkapk2(0.29), Mapkapk2(0.29), Flt4(0.23), Flt1(0.19), Flt1(0.19), Flt1(0.19), Foxc1(0.19), Vegfc(0.19), Vegfc(0.19), Ptk2b(0.1), Ptk2b(0.1), Bmpr2(0.09), Foxc2(0.06), Vegfa(0.06), Vegfa(0.06), Kdr(0.04), Kdr(0.04), Bcar1(0), Prkd2(-0.02), Vegfb(-0.15), Ccl2(-0.17), Mapk14(-0.17), Prkd1(-0.21), Nrp1(-0.23), Nrp1(-0.23), Vegfd(-0.8), Vegfd(-0.8),
T cell receptor signaling pathway	0.0676832	0.170772	0.00114351	0.00791729	43	0.182354	0.0102886	0.0530127	0.0610296	0.331481	Ptpn22(0.83), Pde4b(0.64), Txk(0.51), Themis2(0.37), Bcl10(0.32), Itk(0.25), Nras(0.25), Cacnb3(0.24), Ptprc(0.24), Fyn(0.2), Fyn(0.2), Psen1(0.18), Sppl3(0.14), Sppl3(0.14), Ripk2(0.14), Lcp2(0.11), Hras(0.1), Rftn1(0.1), Plcg1(0.09), Stk11(0.08), Stk11(0.08), Shb(0.07), Psen2(0.03), Braf(0.03), Rnf31(0.01), Prkd2(-0.02), Traf6(-0.04), Malt1(-0.04), Malt1(-0.04), Mapk1(-0.05), Stoml2(-0.06), Tnf…
regulation of G-protein coupled receptor protein signaling pathway	0.042615	0.242808	0.00117019	0.00808622	29	0.399179	0.000942584	0.341837	0.055513	0.0748442	Rgs18(1.45), Itgb3(0.82), Rgs1(0.71), Ramp3(0.52), Rgs7(0.49), Rgs7(0.49), Rgs7(0.49), Rgs2(0.42), Gpsm1(0.41), Itgb1(0.22), Arrb2(0.21), Arrb2(0.21), Git1(0.15), Ric8a(0.12), Grk5(0.09), Tulp3(0.09), Plce1(0.07), Dynlt1b(0.02), Ramp2(0.01), Kctd12b(-0.04), Usp33(-0.08), Rgs9(-0.12), Kctd12(-0.12), Usp20(-0.29), Arrb1(-0.32), Arrb1(-0.32), Rgs14(-0.43), Plcb1(-0.52), Homer2(-0.56),
SUMO binding	0.0699271	0.352217	0.00121853	0.00840381	10	0.103384	0.0909091	0.00853234	0.205347	0.165534	Zcchc12(1.11), Uspl1(0.21), Tollip(0.17), Pml(0.13), Rps3(0.09), Cbx4(0.03), Cbx4(0.03), Tdg(0.02), Herc2(0.01), Usp25(0),
cysteine-type endopeptidase activator activity involved in apoptotic process	0.0680145	0.310979	0.00123157	0.00847144	13	0.215192	0.162359	0.0273279	0.0592478	0.0649656	Apaf1(0.34), Bcl10(0.32), Nkx3-1(0.27), Tnfrsf10b(0.15), Cdkn1b(0.13), Rack1(0.08), Casp8ap2(0.08), Rps27l(0.04), Ctsh(-0.03), Ctsh(-0.03), Bad(-0.04), Bad(-0.04), Mapk9(-0.05),
sequence-specific DNA binding	0.0231601	0.0712839	0.00123312	0.00847144	469	0.247845	0.00303725	0.0201199	0.060651	0.601039	Nfe2(1.62), Fosb(0.86), Atf3(0.85), Cebpd(0.85), Fos(0.81), Nr4a1(0.77), Maff(0.75), Foxq1(0.68), Csrnp1(0.65), Pgbd1(0.59), Eomes(0.57), Nr5a2(0.57), Crem(0.54), Fosl1(0.54), Cebpb(0.52), Cebpb(0.52), Egr1(0.48), Junb(0.48), Fosl2(0.46), Jun(0.46), Atf4(0.45), Mafk(0.44), Prdm1(0.43), Sox9(0.41), Nfil3(0.4), Pax8(0.4), Klf2(0.38), Sox7(0.38), Foxd1(0.37), Foxd1(0.37), Rela(0.36), Rela(0.36), Tea…
RNA export from nucleus	0.0649556	0.373974	0.00124307	0.00852324	11	0.0334108	0.195161	0.0270961	0.094208	0.202796	Rae1(0.15), Pom121(0.12), Ranbp1(0.08), Nxt1(0.08), Nup188(0.04), Nup153(0.03), Nup133(0), Nup98(0), Nxf1(-0.01), Xpo5(-0.01), Tpr(-0.06),
positive regulation of T cell chemotaxis	0.0549001	0.363137	0.00124946	0.00855043	11	0.0201574	0.0192948	0.431933	0.0191038	0.345474	Ccr7(2.19), Tnfsf14(1.25), Ccl27a(0.17), Ccr2(0.12), Tmem102(0.11), Adam10(0.05), Ccl5(0.03), Ccl5(0.03), Adam17(-0.1), Wnt5a(-0.27), Cxcl13(-0.39),
regulation of cell cycle	0.0448773	0.118378	0.00126541	0.0086386	100	0.211002	0.0631847	0.0252532	0.0274418	0.292832	Ccng2(0.57), Cdkn1a(0.54), Id3(0.53), Junb(0.48), Gadd45b(0.47), Jun(0.46), Ccnf(0.45), Gadd45g(0.41), Rgcc(0.38), Jund(0.34), Zfp703(0.29), Sfn(0.26), Nras(0.25), Ptprc(0.24), Arntl(0.23), Csnk2a2(0.23), Itgb1(0.22), Src(0.22), E2f5(0.19), Gadd45a(0.18), Gas2l1(0.18), E2f2(0.18), Cables2(0.18), Sgk1(0.14), Sipa1(0.14), Ppp2ca(0.12), Lemd3(0.12), Stat3(0.11), Stat3(0.11), E2f4(0.1), Grk5(0.09), N…
positive regulation of viral genome replication	0.0624688	0.241043	0.00126722	0.0086386	22	0.0579274	0.156323	0.08165	0.00290265	0.49346	Nr5a2(0.57), Pabpc1(0.18), Tarbp2(0.18), Ppie(0.17), Ddx3x(0.12), Pkn2(0.11), Ppid(0.1), Stau1(0.09), Ppia(0.08), Hacd3(0.06), Ppih(0.06), Larp1(0.05), Notch1(0.03), Adar(0.03), Adar(0.03), Adarb1(0.02), Ddb1(0.01), Srpk1(-0.04), Vapb(-0.04), Srpk2(-0.05), Rad23a(-0.12), Top2a(-0.45),
palmitoyltransferase activity	0.0611506	0.16057	0.00127625	0.00868341	54	0.0131275	0.591432	0.0570157	0.0852888	0.0355801	Mboat1(0.42), Zdhhc18(0.32), Zdhhc18(0.32), Zdhhc2(0.27), Zdhhc2(0.27), Zdhhc13(0.25), Zdhhc20(0.22), Zdhhc14(0.19), Zdhhc8(0.17), Zdhhc8(0.17), Lpgat1(0.12), Lpcat3(0.11), Ykt6(0.11), Zdhhc12(0.11), Nat8f1(0.1), Zdhhc16(0.1), Zdhhc16(0.1), Pla2g15(0.1), Esco1(0.09), Nat6(0.08), Nat9(0.07), Zdhhc21(0.05), Zdhhc21(0.05), Naa50(0.05), Mboat7(0.04), Nat10(0.04), Zdhhc3(0.03), Zdhhc3(0.03), Zdhhc15(0…
SCF ubiquitin ligase complex	0.0637397	0.171436	0.0012812	0.00870034	56	0.340834	0.068174	0.00764324	0.0406498	0.249753	Ccnf(0.45), Fbxo17(0.31), Fbxo32(0.31), Fbxo32(0.31), Abtb1(0.26), Abtb2(0.22), Fbxl2(0.21), Fbxl15(0.2), Btbd9(0.19), Fbxl3(0.16), Spop(0.1), Btbd11(0.1), Cul1(0.09), Cul1(0.09), Fbxo6(0.09), Fbxo6(0.09), Fbxo4(0.07), Fbxo4(0.07), Fbxl5(0.07), Fbxw11(0.06), Fbxw11(0.06), Fbxl19(0.05), Btbd6(0.05), Fbxo2(0.04), Usp47(0.03), Usp47(0.03), Rbx1(0.01), Rbx1(0.01), Rbx1(0.01), Fbxo31(0.01), Fbxo31(0.0…
GTP-Rho binding	0.0509758	0.277177	0.00129547	0.00875524	18	0.0500144	0.0753226	0.00946759	0.139911	0.410332	Cdc42ep3(0.56), Gm14137(0.3), Kctd13(0.23), Cdc42ep5(0.22), Cdc42ep5(0.22), Whamm(0.21), Tnfaip1(0.2), Cdc42ep2(0.18), Cdc42ep2(0.18), Cdc42ep4(0.16), Cdc42ep1(0.15), Rock1(0.06), Rtkn(0), Rtkn(0), Net1(-0.03), Exoc1(-0.04), Pkn1(-0.18), Stxbp6(-0.32),
receptor activity	0.0489695	0.119405	0.00129641	0.00875524	105	0.12672	0.00401002	0.325105	0.00652661	0.497348	Fpr2(1.55), Treml2(1.22), Clec4e(1.01), Klrb1b(0.96), Itgb3(0.82), Ramp3(0.52), Pvr(0.5), Siglece(0.44), Cd48(0.41), Unc13a(0.41), Robo4(0.38), Tnfrsf22(0.37), Nectin2(0.35), Gfra1(0.34), Gfra1(0.34), Tlr4(0.28), Grin3b(0.28), Rtn4rl2(0.24), Itgb1(0.22), Nectin4(0.22), Notch4(0.2), Antxr2(0.2), Cadm3(0.17), Jmjd6(0.17), Nlgn2(0.17), Itgb2(0.16), P2rx7(0.16), Calcr(0.15), Cadm1(0.15), Mrc1(0.14), …
positive regulation of mRNA catabolic process	0.0748006	0.334264	0.00129825	0.00875524	11	0.0788629	0.233975	0.0342169	0.0230074	0.218063	Zc3hav1(0.27), Zc3h12a(0.21), Zc3h12a(0.21), Gtpbp1(0.2), Cnot7(0.11), Rc3h1(0.09), Cnot8(0.08), Upf1(0.06), Hnrnpr(-0.03), Pnpt1(-0.06), Cnot1(-0.11),
actin cytoskeleton	0.0332441	0.0962001	0.00130017	0.00875524	187	0.0363774	0.00159262	0.210333	0.00483465	0.919634	Nfe2(1.62), Arc(0.61), Cdc42ep3(0.56), Fgr(0.54), Tnnc1(0.54), Slc16a3(0.51), Bmf(0.44), 3110043O21Rik(0.4), Pdlim7(0.37), Cttnbp2nl(0.35), Arpc1b(0.32), Ctdp1(0.31), Dbn1(0.27), Dbn1(0.27), Cdh1(0.26), Myrip(0.26), Ell(0.24), Arpc5(0.24), Ezr(0.23), Stk17b(0.23), Fam129b(0.23), Abl2(0.22), Baiap2l1(0.22), Baiap2l1(0.22), Cnn3(0.22), Peak1(0.22), Peak1(0.22), Taf5(0.21), Hax1(0.2), Hspb7(0.19), F…
neural tube formation	0.0733633	0.279498	0.00132651	0.0089055	16	0.349343	0.163354	0.0729102	0.0253517	0.0259598	Sox4(0.67), Cited2(0.27), Ipmk(0.22), Stk3(0.19), Casp8(0.16), Nup50(0.1), Ptch1(0.09), Tulp3(0.09), Tctn1(0.08), Map3k7(0.06), Stk4(0.06), Mib1(0.06), Coq7(-0.03), Ift52(-0.14), Sox11(-0.37), Ift172(-0.51),
cell separation after cytokinesis	0.0655118	0.299958	0.00133825	0.00896729	14	0.124538	0.151345	0.0989997	0.0651861	0.0417333	Chmp2a(0.21), Chmp4b(0.18), Chmp2b(0.17), Mitd1(0.17), Chmp4c(0.13), Vps4a(0.12), Vps4b(0.11), Chmp7(0.08), Chmp3(0.06), Chmp1a(0.06), Pdcd6ip(0.05), Chmp5(-0.03), Kif20a(-0.15), Chmp6(-0.19),
neurotransmitter secretion	0.0672651	0.262696	0.00134964	0.00902654	18	0.141603	0.00838326	0.287376	0.0924344	0.0874827	Syn1(1), Syn1(1), Unc13a(0.41), Brsk1(0.3), Nrxn2(0.27), Syt2(0.23), Wnt7a(0.22), Rims2(0.21), Syn3(0.06), Dvl1(0.05), Stxbp1(0.05), Lin7c(0.05), Snap91(-0.01), Pdzd11(-0.02), Ppt1(-0.12), Lin7a(-0.17), Syn2(-0.19), Syn2(-0.19),
type II transforming growth factor beta receptor binding	0.0276283	0.42198	0.00135503	0.00904547	10	0.318054	4.7242e-05	0.554892	0.0230258	0.318733	Cd44(0.33), Tgfbr1(0.27), Tgfb1(0.26), Tgfb1(0.26), Tgfb3(0.07), Tgfb3(0.07), Tgfb2(0), Tgfb2(0), Tgfbr3(-0.03), Eng(-0.09),
epidermal growth factor receptor binding	0.0362325	0.216837	0.00136312	0.00907246	33	0.312028	0.020102	0.0489692	0.0774073	0.139593	Ereg(0.71), Hbegf(0.36), Hbegf(0.36), Cd44(0.33), Itga5(0.33), Socs5(0.25), Plscr1(0.24), Snx1(0.21), Grb2(0.19), Tnk2(0.17), Shc1(0.14), Tgfa(0.14), Tgfa(0.14), Btc(0.13), Btc(0.13), Arf4(0.12), Rnf126(0.09), Atxn2(0.06), Snx4(0.06), Cblc(0.04), Yes1(0.01), Fer(-0.03), Pigr(-0.03), Fam83b(-0.04), Snx2(-0.05), Vav3(-0.09), Vav2(-0.15), Areg(-0.28), Areg(-0.28), Efemp1(-0.33), Egf(-0.47), Egf(-0.4…
microtubule associated complex	0.0549409	0.223127	0.0013642	0.00907246	26	0.0267886	0.355648	0.00310132	0.146531	0.270148	Mefv(1.34), Fntb(0.41), Map1b(0.22), Map1b(0.22), Pea15a(0.18), Map1lc3b(0.16), Map4(0.12), Lrp8(0.09), Pafah1b1(0.07), Pafah1b1(0.07), Gabarap(0.07), Fnta(0.06), Hdac6(0.06), Shtn1(0.06), Wdr43(0.06), Kif1b(0.05), Dctn3(0.05), Dynll1(0.04), Ndel1(0.03), Ranbp2(0.01), Dnaaf2(-0.03), Wdr81(-0.17), Map1a(-0.18), Dynll2(-0.18), Map2(-0.23), Mapt(-0.3),
MAP kinase kinase activity	0.0493368	0.248305	0.00137379	0.00911911	22	0.378612	0.00340048	0.00859619	0.0960728	0.502452	Pak3(0.85), Grk2(0.26), Map2k1(0.22), Map2k1(0.22), Map2k3(0.22), Map2k3(0.22), Map2k7(0.2), Map2k7(0.2), Coq8b(0.2), Grk6(0.18), Alpk1(0.18), Map2k4(0.17), Grk3(0.1), Grk5(0.09), Map3k7(0.06), Map2k2(0.04), Adck5(-0.1), Adck2(-0.11), Adck1(-0.17), Map2k6(-0.35), Map2k6(-0.35), Lrrk2(-0.61),
R-SMAD binding	0.0484393	0.246066	0.00140739	0.00932464	22	0.484529	0.0364774	0.00139792	0.123182	0.242189	Fos(0.81), Jun(0.46), Rgcc(0.38), Smad3(0.35), Smurf1(0.29), Ankrd1(0.24), Pmepa1(0.22), Smad6(0.18), Ppm1a(0.17), Axin1(0.13), Smad4(0.13), Myocd(0.11), Ranbp3(0.1), Ranbp3(0.1), Trim33(0.08), Smad2(0.07), Men1(0.01), Zeb2(0.01), Ldlrad4(-0.23), Parp1(-0.34), Zc3h3(-0.41), Ranbp3l(-0.95),
spliceosomal tri-snRNP complex assembly	0.0713554	0.336748	0.00141455	0.00935456	12	0.0285214	0.233533	0.160991	0.0207273	0.154652	Lsm2(0.24), Prpf3(0.12), Aar2(0.09), Sart3(0.06), Prpf6(0.03), Prpf6(0.03), Prpf19(0), Usp4(-0.03), Prpf31(-0.04), Prpf31(-0.04), Prpf8(-0.12), Prpf8(-0.12),
posttranscriptional regulation of gene expression	0.0597291	0.256636	0.00142007	0.00937355	22	0.347578	0.241379	0.0133476	0.0475762	0.0450281	Gcnt2(0.34), Gcnt2(0.34), Per1(0.27), Ace(0.14), Rc3h2(0.13), Atg14(0.13), Npm1(0.09), Rc3h1(0.09), Rc3h1(0.09), Fbxo4(0.07), Nanos1(0.06), Nanos1(0.06), Pum2(0.05), Pum2(0.05), Matr3(0.02), Nacc2(0), Tdrd7(-0.03), Cdc37(-0.04), Pum1(-0.06), Pum1(-0.06), Cav1(-0.12), Epb41l5(-0.26),
Prp19 complex	0.0754719	0.32161	0.00144371	0.00951182	13	0.140073	0.0308182	0.0346385	0.0623995	0.358725	Rbm22(0.15), Syf2(0.13), Bcas2(0.12), Isy1(0.1), Polr2a(0.08), Plrg1(0.07), Crnkl1(0.07), U2af2(0.01), Hspa8(0), Prpf19(0), Xab2(0), Ctnnbl1(-0.04), Cdc5l(-0.09),
chromatin organization	0.0754663	0.174893	0.00147628	0.0097083	41	0.187831	0.025321	0.0146701	0.161717	0.260994	Las1l(0.28), Morf4l2(0.25), Sirt1(0.2), Hira(0.18), Ing2(0.17), Ing5(0.16), Lrwd1(0.14), Msl3(0.11), Ing1(0.11), Ing4(0.11), Hdac7(0.07), Hdac1(0.07), Hdac5(0.06), Ubn1(0.06), Hdac4(0.06), Zfp462(0.06), Bend3(0.06), Hdac2(0.05), Morf4l1(0.05), Nucks1(0.04), Hdac3(0.03), Hmg20b(0.03), Hmgn1(0.02), Ehmt1(0.02), Mum1(0.01), Cdan1(0.01), Hat1(0), Nup133(0), Hmgn5(-0.03), Ing3(-0.03), Arid1a(-0.03), C…
peptidyl-tyrosine autophosphorylation	0.0465025	0.185671	0.00148009	0.00971532	44	0.0555529	0.0105511	0.282512	0.00263912	0.732071	Syk(0.6), Fgr(0.54), Txk(0.51), Fes(0.33), Matk(0.26), Itk(0.25), Tec(0.24), Tec(0.24), Abl2(0.22), Src(0.22), Fyn(0.2), Btk(0.17), Tnk2(0.17), Bmx(0.16), Hck(0.16), Jak2(0.16), Ptk2(0.14), Ptk2b(0.1), Ptk2b(0.1), Csk(0.08), Frk(0.08), Tnk1(0.08), Jak1(0.06), Tyk2(0.06), Abl1(0.05), Abl1(0.05), Kdr(0.04), Mapk3(0.03), Lyn(0.02), Yes1(0.01), Lck(-0.02), Fer(-0.03), Jak3(-0.04), Igf1r(-0.05), Igf1r…
death receptor binding	0.0840065	0.29314	0.00148741	0.00974531	14	0.128241	0.0791717	0.0661185	0.12928	0.0719663	Casp3(0.28), Cflar(0.27), Tmbim1(0.25), Prdm4(0.24), Tnfsf15(0.19), Fem1b(0.17), Casp8(0.16), Nsmaf(0.1), Ripk1(0.09), Bex3(0), Dab2ip(-0.01), Fadd(-0.03), Nol3(-0.03), Edaradd(-0.59),
negative regulation of myeloid cell differentiation	0.073714	0.241703	0.00150594	0.00984848	22	0.37375	0.0853358	0.0646965	0.0644866	0.02828	Nfkbia(0.48), Zfp36(0.41), Rbm15(0.22), Rbm15(0.22), Zbtb16(0.21), Hmgb3(0.12), Ptk2b(0.1), Itpkb(0.07), Paf1(0.05), Leo1(0.05), Hoxa9(0.03), Ctr9(0.01), Cdc73(0.01), Gpr171(0), Gpr171(0), Meis2(-0.02), Cdk6(-0.03), Dll1(-0.03), Hoxb8(-0.03), Wdr61(-0.05), Meis1(-0.07), Gata2(-0.13),
positive regulation of epithelial cell proliferation	0.0761601	0.142602	0.00152396	0.00994792	64	0.0885784	0.0293914	0.220144	0.0233729	0.265826	Il6(1.08), Il6(1.08), Nog(0.78), Nog(0.78), Glul(0.58), Sox9(0.41), Sox9(0.41), Nr4a3(0.27), Tgfb1(0.26), Egfr(0.23), Egfr(0.23), Vegfc(0.19), Myc(0.18), C5ar2(0.16), Id1(0.15), Bmp6(0.14), Kif3a(0.14), Tgfa(0.14), Wdr48(0.14), Nme2(0.13), Bmpr1a(0.11), C5ar1(0.11), Fgf7(0.11), Fgf7(0.11), Hras(0.1), Fgfr2(0.08), Vhl(0.08), Scn5a(0.07), Twist1(0.07), Esrp2(0.07), Vegfa(0.06), Foxp1(0.06), Kdr(0.0…
extrinsic apoptotic signaling pathway in absence of ligand	0.064676	0.20356	0.00152795	0.0099556	35	0.458876	0.0152581	0.0144565	0.126545	0.151687	Lcn2(0.84), Il1b(0.74), Bag3(0.41), Bcl2l1(0.28), Ngf(0.25), Erbb3(0.22), Mknk2(0.21), Mknk2(0.21), Itgav(0.19), Mcl1(0.17), Mcl1(0.17), Kitl(0.15), Casp2(0.13), Gsk3a(0.1), Bcl2l2(0.08), Gsk3b(0.08), Bak1(0.07), Bcl2l11(0.07), Bcl2l11(0.07), Bax(0.01), Eya2(0.01), Fadd(-0.03), Bad(-0.04), Bad(-0.04), Bad(-0.04), Itm2b(-0.04), Itm2b(-0.04), Bcl2(-0.06), Mknk1(-0.08), Mknk1(-0.08), Bok(-0.16), Fox…
histone acetyltransferase binding	0.0806976	0.205023	0.00154011	0.0100164	30	0.169086	0.0664797	0.044545	0.102706	0.11681	Cebpb(0.52), Egr1(0.48), Cited2(0.27), Nr4a3(0.27), Hif1a(0.24), Mtf1(0.14), Taf7(0.11), Taf7(0.11), Kansl1(0.11), Myocd(0.11), Zbtb7a(0.1), Mef2a(0.1), Creb1(0.09), Sp1(0.08), Trp53(0.08), Kat2b(0.07), Pcna(0.07), Trip4(0.07), Ets1(0.06), Apbb1(0.03), Sirt2(0.03), Trim68(0.01), Epas1(0), Apbb2(-0.03), Gli3(-0.03), Ecd(-0.07), Pla2g4a(-0.08), Eid1(-0.13), Bcas3(-0.17), Kansl1l(-0.18),
cell death	0.0710689	0.1922	0.00155569	0.0100992	33	0.109247	0.0330798	0.0828594	0.0202302	0.457009	Clu(0.67), Hmox1(0.61), Cacna1a(0.49), Emp1(0.48), Emp2(0.37), Bcl10(0.32), Klk8(0.31), Pmp22(0.28), Olr1(0.26), Parp4(0.24), Rgs19(0.18), Rraga(0.17), Axin1(0.13), Cdkn1b(0.13), Map3k11(0.12), Vapa(0.08), Ndor1(0.08), Pnpla8(0.05), Map3k10(0.05), Bnip3(0.04), Atp6ap1(0.03), Faf1(0.01), Als2(0.01), Tgfb2(0), Sncaip(0), Prkd2(-0.02), Map3k9(-0.1), Susd6(-0.12), Fbxo18(-0.13), Emp3(-0.2), Axin2(-0.…
protein-arginine N-methyltransferase activity	0.031115	0.175003	0.00156302	0.0101282	79	5.7054e-05	0.5581	0.394664	0.0383518	0.195419	Setd4(0.52), Prdm1(0.43), Mettl6(0.37), Trmt10a(0.28), Prdm4(0.24), Bmt2(0.21), Prmt2(0.17), Mettl22(0.15), Mepce(0.14), Mrm1(0.12), Fbxo11(0.12), Mettl18(0.11), Trmt10c(0.09), Emg1(0.08), Ftsj3(0.08), Smyd2(0.08), Trmt11(0.07), Nsun5(0.07), Mettl25(0.07), Smyd5(0.07), Mettl2(0.06), Trmt10b(0.06), Mettl13(0.06), Fbl(0.05), Trmt2a(0.05), Setd6(0.05), Wbscr22(0.05), Mettl23(0.04), Ece2(0.04), Nop2(…
spermatogenesis	0.0471024	0.0823269	0.00157459	0.010164	225	0.179685	0.672777	0.00918706	0.0611775	0.0128502	Piwil2(1.27), Bmp8b(1), Ercc1(0.62), Arid4b(0.6), Hmga1(0.59), Crem(0.54), Crem(0.54), Hspa1l(0.53), Rad18(0.47), Bmp8a(0.44), Tmem119(0.43), Rgs2(0.42), Sox9(0.41), Hsf2bp(0.4), Creb3l4(0.36), Hmga2(0.34), Mas1(0.32), Chd5(0.32), Cdyl(0.31), Ggn(0.29), Bcl2l1(0.28), H2afx(0.28), Dnmt3l(0.26), B4galnt1(0.24), Tyro3(0.24), Paip2(0.24), Taf4b(0.24), Arntl(0.23), Hsf2(0.23), Sycp3(0.23), Sycp3(0.23)…
protein export from nucleus	0.0548665	0.227541	0.00157718	0.010164	30	0.00535248	0.439787	0.195909	0.0420031	0.0944934	Smurf1(0.29), Tgfb1(0.26), Ranbp17(0.25), Chp1(0.2), Xpo6(0.18), Ran(0.15), Calr(0.11), Nup88(0.11), Nxt1(0.08), Gsk3b(0.08), Eif5a(0.02), Egr2(0.01), Pkd1(0), Nutf2(0), Xpo5(-0.01), Xpo5(-0.01), Hspa9(-0.03), Cchcr1(-0.04), Xpo7(-0.05), Xpo7(-0.05), Strada(-0.07), Nup214(-0.07), Ahcyl1(-0.07), Cse1l(-0.08), Xpo1(-0.12), Xpo1(-0.12), Xpo1(-0.12), Xpo4(-0.19), Nupl2(-0.22), Stradb(-0.23),
translation elongation factor activity	0.0699452	0.264458	0.00161478	0.010377	20	0.0655412	0.234569	0.274269	0.0397835	0.0228404	Abtb1(0.26), Gtpbp2(0.21), Gtpbp1(0.2), Eif5a2(0.18), Eef1a1(0.09), Hbs1l(0.09), Eef2(0.06), Eef1b2(0.06), Eef1e1(0.05), Eif5a(0.02), Eef1d(0.01), Eef1g(0), Efl1(-0.01), Tufm(-0.01), Tufm(-0.01), Tsfm(-0.02), Eefsec(-0.12), Gfm2(-0.15), Gfm1(-0.17), Gfm1(-0.17),
toxin transport	0.0796273	0.190673	0.00165319	0.010596	33	0.0901829	0.115117	0.0160234	0.239331	0.119544	Cd274(0.52), Hspa5(0.3), Bbc3(0.22), Crtc2(0.21), Antxr2(0.2), Vamp4(0.18), Atp6v0a1(0.17), Tcp1(0.17), Cct5(0.14), Cct7(0.14), Dnaja1(0.11), Cct2(0.09), Cct3(0.07), Cct4(0.07), Trip4(0.07), Cct8(0.06), Rab43(0.06), Bnip3(0.04), Copb2(0.03), Gga1(0.03), Rab28(0.01), Casp1(0), Scfd1(-0.02), Arid1a(-0.03), Copz1(-0.04), Mep1b(-0.05), Dnajc17(-0.05), Vps11(-0.07), Mtmr12(-0.2), Ptprg(-0.21), Nrp1(-0…
cellular response to vascular endothelial growth factor stimulus	0.051701	0.270832	0.0016931	0.0108322	22	0.00762995	0.00404234	0.165701	0.136273	0.722672	Hspb1(0.9), Nr4a1(0.77), Egr3(0.32), Mapkapk2(0.29), Mapkapk2(0.29), Flt4(0.23), Dll4(0.2), Flt1(0.19), Ern1(0.12), Akt1(0.11), Vegfa(0.06), Vegfa(0.06), Kdr(0.04), Notch1(0.03), Ramp2(0.01), Dab2ip(-0.01), Dab2ip(-0.01), Itgb1bp1(-0.02), Prkd2(-0.02), Mapk14(-0.17), Prkd1(-0.21), Nrp1(-0.23),
positive regulation of stress fiber assembly	0.0658966	0.175452	0.00171806	0.010972	42	0.236289	0.0202957	0.187018	0.0551231	0.0984887	Tac1(1.42), Wnt11(0.8), Ctgf(0.55), Apoa1(0.51), Gpr65(0.4), Rgcc(0.38), Smad3(0.35), Sdc4(0.34), Rac1(0.3), Tgfbr1(0.27), S100a10(0.26), Pfn2(0.16), Pfn2(0.16), Ppm1f(0.15), Lpar1(0.11), Pak1(0.1), Pfn1(0.1), Arhgef5(0.1), Limk1(0.08), Sorbs3(0.07), Tgfb3(0.07), Evl(0.04), Braf(0.03), Braf(0.03), Rhoa(0.02), Carmil1(0.02), Carmil1(0.02), Itgb1bp1(-0.02), Arhgef15(-0.02), Tpm1(-0.03), Arhgef10(-0…
dynactin complex	0.0737126	0.367637	0.00172242	0.0109801	11	0.184233	0.0421759	0.0157489	0.283635	0.116569	Dctn2(0.13), Dctn2(0.13), Actr1a(0.12), Dctn4(0.06), Dctn3(0.05), Dctn3(0.05), Actr10(0.01), Dctn1(-0.01), Actr1b(-0.01), Dctn6(-0.02), Dctn5(-0.05),
transcription elongation from RNA polymerase II promoter	0.0824824	0.277301	0.00174341	0.0110787	17	0.124155	0.219105	0.0118818	0.117203	0.124597	Ell2(0.4), Adrm1(0.25), Ell(0.24), Rtf1(0.12), Thoc7(0.1), Tceb2(0.1), Tceb3(0.09), Tceb3(0.09), Supt4a(0.07), Supt5(0.05), Paf1(0.05), Leo1(0.05), Cdc73(0.01), Elof1(-0.01), Setd2(-0.03), Elp3(-0.16), Elp4(-0.28),
positive regulation of cAMP biosynthetic process	0.053341	0.242442	0.00174415	0.0110787	27	0.0258394	0.00244361	0.24407	0.228161	0.369436	Akap12(0.79), Adora2b(0.67), Adora2b(0.67), Drd1(0.57), Gpr65(0.4), Insl3(0.19), Calcr(0.15), Adm(0.13), Nme2(0.13), Gsk3a(0.1), Calcrl(0.06), Ece1(0.06), Gnas(0.03), Ramp2(0.01), Adcyap1r1(0), Gpr161(-0.02), Ptger4(-0.04), Abca1(-0.11), Ptgir(-0.14), Ptgir(-0.14), Ptger3(-0.19), Adora2a(-0.2), Adcy7(-0.22), Mrap(-0.41), Gper1(-0.56), Gper1(-0.56), Adrb1(-0.57),
SMN-Sm protein complex	0.0580398	0.290095	0.0017796	0.0112836	17	0.00890436	0.131235	0.539854	0.0113296	0.198087	Snrpd1(0.24), Snrpd1(0.24), Gemin8(0.19), Gemin8(0.19), Smn1(0.17), Strap(0.14), Gemin2(0.14), Gemin7(0.14), Snrpb(0.13), Snrpf(0.09), Ddx20(0.03), Gemin5(0.03), Snrpd2(0.02), Gemin6(-0.01), Snrpd3(-0.06), Snrpd3(-0.06), Snrpg(-0.24),
negative regulation of endothelial cell apoptotic process	0.0800614	0.225348	0.00178728	0.0113119	24	0.107436	0.0321194	0.12036	0.037749	0.318013	Fgb(1.88), Fgg(1.46), Fga(1.06), Serpine1(0.8), Fgf21(0.43), Angptl4(0.42), Abl2(0.22), Mapk7(0.2), Tnip2(0.17), Krit1(0.16), Tnfaip3(0.15), Tert(0.1), Nfe2l2(0.09), Abl1(0.05), Kdr(0.04), Braf(0.03), Ramp2(0.01), Ramp2(0.01), Icam1(-0.08), Gata3(-0.26), Sema5a(-0.44), Gas6(-0.53), Tek(-0.59), Angpt1(-0.66),
positive regulation of stress-activated MAPK cascade	0.0572724	0.265875	0.00181857	0.0114895	19	0.0621433	0.0139495	0.0213973	0.210532	0.525302	Il1b(0.74), Sema4c(0.42), Tlr4(0.28), Card9(0.24), Card9(0.24), Mid1(0.2), Arl6ip5(0.15), Ripk2(0.14), Pdcd10(0.13), Hmgcr(0.11), Stk25(0.07), Taok1(0.07), Taok3(0.01), Tgfb2(0), Taok2(0), Nod1(-0.01), Eif2ak2(-0.06), Nod2(-0.14), Nod2(-0.14),
glycoprotein binding	0.0752027	0.133302	0.00188279	0.011857	67	0.0133681	0.0644724	0.264026	0.141973	0.148672	Apoh(0.77), Hsp90aa1(0.65), Itgam(0.63), Stx1a(0.42), Hsp90ab1(0.4), Azgp1(0.32), Fbxo17(0.31), Hspa5(0.3), Cdh1(0.26), Itga3(0.26), Tgfb1(0.26), Selp(0.25), Sdc1(0.24), Egfr(0.23), Itgb1(0.22), Bbc3(0.22), Dnajc5(0.2), Fyn(0.2), Sdcbp(0.2), Csnk1d(0.2), Itgb2(0.16), Tgfa(0.14), Edem1(0.14), Ccr5(0.12), Vim(0.12), Bmpr1a(0.11), Calr(0.11), Csnk1g2(0.1), Lrp8(0.09), Fbxo6(0.09), Flna(0.08), Csnk1g…
synaptic transmission, glutamatergic	0.0761424	0.251933	0.00188344	0.011857	19	0.0272919	0.0466366	0.201357	0.271684	0.0759377	Plat(0.57), Adrb2(0.54), Cacna1a(0.49), Unc13a(0.41), Unc13a(0.41), Clstn3(0.38), Napb(0.33), Unc13b(0.23), Unc13b(0.23), Grin2d(0.13), Napa(0.05), Grik5(0.01), Als2(0.01), P2rx1(-0.08), Clcn3(-0.11), Cdk5(-0.17), Adora2a(-0.2), Park2(-0.42), Cacnb4(-0.5),
Set1C/COMPASS complex	0.0691744	0.374699	0.00193698	0.0121723	11	0.0528376	0.572554	0.105345	0.0474232	0.0178111	Setd1a(0.17), Cxxc1(0.15), Wdr5(0.12), Ash2l(0.04), Ash2l(0.04), Wdr82(0.03), Hcfc1(0.02), Rbbp5(-0.01), Rbbp5(-0.01), Dpy30(-0.08), Dpy30(-0.08),
myelin sheath	0.0214024	0.125151	0.0019414	0.0121785	183	0.293327	0.00306756	0.486403	0.597453	0.000355606	Hba-a1(1.48), Hbb-b1(1.43), Syn1(1), Hsp90aa1(0.65), Hsp90aa1(0.65), Glul(0.58), Glul(0.58), Uchl1(0.55), Nefm(0.5), Tuba1a(0.45), Tuba1a(0.45), Car13(0.43), Ywhag(0.36), Rtn4(0.35), Alb(0.34), Napb(0.33), Hspa5(0.3), Serinc5(0.3), Hspd1(0.28), Ubb(0.27), Atp6v1b2(0.26), Msn(0.25), Prx(0.23), Ezr(0.23), Gnao1(0.22), Gnao1(0.22), Ubc(0.2), Cryab(0.18), Fscn1(0.18), Tcp1(0.17), Vcp(0.17), Arf6(0.16…
positive regulation of telomere maintenance	0.0748917	0.363758	0.00195821	0.0122622	11	0.0446174	0.167071	0.0502408	0.157052	0.127932	Pml(0.13), Tinf2(0.12), Gnl3(0.1), Terf2(0.02), Terf2(0.02), Mre11a(0), Atrx(-0.02), Dhx36(-0.02), Nbn(-0.03), Rad50(-0.05), Rtel1(-0.06),
ubiquitin conjugating enzyme binding	0.0569315	0.201802	0.00197295	0.0123327	32	0.135072	0.450224	0.00104401	0.272702	0.0623355	Rnf125(0.67), Trim72(0.48), Rnf180(0.43), Rnf19b(0.34), Rnf144b(0.34), Arih2(0.24), Rnf4(0.21), Siah2(0.19), Rnf217(0.19), Ube2v1(0.18), Dcun1d5(0.18), Tollip(0.17), Zmym2(0.17), Rnf138(0.14), Dcun1d3(0.11), Arih1(0.08), Rnf19a(0.07), Dcun1d1(0.03), Rnf40(0.03), Rnf166(0.02), Rnf114(0), March6(-0.01), Traf6(-0.04), Rnf14(-0.05), Rnf144a(-0.05), Dcun1d2(-0.06), Ankib1(-0.2), Ppara(-0.32), Dcun1d4(…
SUMO transferase activity	0.067473	0.279039	0.00199022	0.0124187	17	0.251521	0.216822	0.00190181	0.315406	0.0534865	Pias3(0.2), Pias3(0.2), Ube2i(0.18), Ube2i(0.18), Nsmce2(0.14), Sumo3(0.11), Mdm2(0.1), Pias4(0.1), Pias4(0.1), Topors(0.08), Mul1(0.04), Cbx4(0.03), Ranbp2(0.01), Pias1(-0.09), Pias2(-0.12), Pias2(-0.12), Sumo2(-0.25),
defense response to virus	0.00411344	0.165794	0.00199465	0.0124244	120	0.666061	2.96784e-06	0.3981	0.00767832	0.634606	Il6(1.08), Oas3(0.74), Ddit4(0.5), Mb21d1(0.47), Isg20(0.32), Serinc5(0.3), Kcnj8(0.29), Rnasel(0.28), Zc3hav1(0.27), Oasl1(0.27), Fv1(0.25), Ptprc(0.24), Ptprc(0.24), Plscr1(0.24), Plscr1(0.24), Card9(0.24), Crcp(0.23), Ifngr2(0.19), Tlr8(0.19), Ifngr1(0.17), Ifitm2(0.16), Ifnlr1(0.16), Ifnlr1(0.16), Polr3d(0.15), Mx2(0.13), Pml(0.13), Tagap(0.13), Ifnar1(0.12), Trim11(0.12), Nlrp3(0.11), Serinc…
positive regulation of chemokine production	0.0440762	0.293886	0.00200731	0.0124813	20	0.334841	0.00213884	0.281811	0.00812253	0.432957	Il6(1.08), Adora2b(0.67), Il6ra(0.28), Tlr4(0.28), Tlr4(0.28), P2ry2(0.26), Il18(0.25), Ripk2(0.14), Tlr3(0.07), Havcr2(0.06), Tlr2(-0.01), Tlr2(-0.01), Mapk9(-0.05), Eif2ak2(-0.06), Tlr7(-0.09), Adam17(-0.1), Lbp(-0.24), Tnf(-0.26), Lgals9(-0.4), Tlr9(-0.41),
regulation of growth	0.0868024	0.135433	0.00201726	0.0125212	64	0.102019	0.0167192	0.0992344	0.19871	0.183893	Osm(1), Igfbp3(0.67), Socs3(0.59), Socs2(0.38), Hmga2(0.34), Tgfbr1(0.27), Morf4l2(0.25), Socs5(0.25), Yeats4(0.21), Cish(0.2), Ndnl2(0.19), Pak2(0.19), Ing2(0.17), Kat5(0.17), Shc1(0.14), Ogfr(0.14), Socs1(0.13), Epc1(0.13), Socs4(0.13), Socs7(0.13), Kctd11(0.13), Armc10(0.12), Phip(0.1), Ptch1(0.09), Socs6(0.09), Rack1(0.08), Tsg101(0.07), Ccdc85b(0.06), E4f1(0.05), Morf4l1(0.05), Dmap1(0.05), …
positive regulation of macrophage activation	0.0579567	0.337165	0.00203692	0.012621	13	0.288917	0.00220542	0.0625895	0.30731	0.162992	Il1rl1(0.52), Thbs1(0.36), Ifi204(0.34), Il4ra(0.3), Hspd1(0.28), Tnip2(0.17), Havcr2(0.06), Cd1d1(-0.02), Il33(-0.08), Il33(-0.08), Lbp(-0.24), Wnt5a(-0.27), Lgals9(-0.4),
germ cell development	0.0765201	0.198542	0.00204484	0.012648	30	0.0906208	0.0792049	0.0207342	0.159202	0.262334	Bmp8b(1), Ercc1(0.62), Cxcr4(0.48), Bmp8a(0.44), Prdm1(0.43), Bcl2l1(0.28), Bcl2l1(0.28), Fancc(0.19), Zfp37(0.16), Kitl(0.15), Rnf2(0.14), Kit(0.12), Akt1(0.11), Wt1(0.08), Tial1(0.07), Smad5(0.06), Zfx(0.03), Bax(0.01), Acvr1(0), Rps6kb1(0), Tdrd7(-0.03), Msh2(-0.04), Rara(-0.06), Mtor(-0.07), Ehmt2(-0.08), Map7(-0.1), Bmp4(-0.15), Wdr81(-0.17), Dnd1(-0.23), Cxcl12(-0.81),
response to radiation	0.0653994	0.243028	0.00206093	0.0127252	21	0.265134	0.00980695	0.0320305	0.323497	0.126391	Junb(0.48), Jun(0.46), Jun(0.46), Plk3(0.37), Jund(0.34), Bcl2l1(0.28), Il1r1(0.18), Myc(0.18), Myc(0.18), Txn1(0.17), Cdc25a(0.15), Kit(0.12), Dcun1d3(0.11), Ogg1(0.1), Zak(0.04), Rad9a(0), Mbd4(-0.14), Col3a1(-0.18), Fancg(-0.19), Snai2(-0.48), Snai2(-0.48),
positive regulation of B cell differentiation	0.0616119	0.282122	0.00210757	0.0129906	16	0.260621	0.0228713	0.0723958	0.004468	0.622914	Syk(0.6), Syk(0.6), Prdm1(0.43), Pnp(0.35), Inpp5d(0.29), Mmp14(0.28), Xbp1(0.19), Ikzf1(0.19), Ppp2r3c(0.13), Nckap1l(0.06), Pcid2(0.03), Bad(-0.04), Il2rg(-0.05), Stat5b(-0.05), Atp11c(-0.05), Stat5a(-0.23),
positive regulation of phosphorylation	0.0716279	0.22161	0.00211288	0.0130007	26	0.285838	0.0625542	0.104299	0.00432965	0.339061	Apln(0.98), Ereg(0.71), Ereg(0.71), Trf(0.37), Thbs1(0.36), Bcl10(0.32), Egfr(0.23), Kctd20(0.21), Sdcbp(0.2), Btbd10(0.18), Grb10(0.17), Mif(0.12), Ripk1(0.09), Nckap1l(0.06), Glmn(0.06), Ccl5(0.03), Lyn(0.02), Itga6(-0.07), Insr(-0.11), Irs1(-0.24), Fzd7(-0.25), Areg(-0.28), Ppargc1b(-0.3), Egf(-0.47), Ar(-0.55), Ang(-0.56),
chromatin silencing complex	0.0676676	0.332435	0.00213165	0.0130934	11	0.0577001	0.175276	0.00283354	0.148505	0.470722	Sirt1(0.2), Smarca5(0.15), Suv39h1(0.13), Suv39h1(0.13), Bahd1(0.1), Bahd1(0.1), Baz2a(0.05), Rrp8(0.03), Rrp8(0.03), Bahcc1(-0.03), Tnrc18(-0.17),
neuromuscular synaptic transmission	0.0625775	0.305175	0.00213853	0.0131129	14	0.0523708	0.0077021	0.262361	0.456435	0.0550378	Cacna1a(0.49), Egr3(0.32), Fchsd1(0.32), Chrnb1(0.31), Chrnb1(0.31), Cd24a(0.21), Cd24a(0.21), Kif1b(0.05), Stxbp1(0.05), Fchsd2(0.05), Ntf3(-0.07), Rab3a(-0.15), Etv5(-0.22), Chrna4(-1.02),
receptor internalization	0.070434	0.181474	0.00214924	0.0131442	36	0.363293	0.00423735	0.243299	0.088745	0.0871748	Cxcr2(1.44), Syk(0.6), Ramp3(0.52), Fcer1g(0.45), Cd9(0.36), Grk2(0.26), Ldlrap1(0.24), Ezr(0.23), Itgb1(0.22), Snx1(0.21), Arrb2(0.21), Grb2(0.19), Itgb2(0.16), Calcr(0.15), Rab31(0.14), Adm(0.13), Ulk1(0.1), Grk3(0.1), Calcrl(0.06), Snca(0.05), Dnm2(0.01), Dnm2(0.01), Ramp2(0.01), Grk4(0), Picalm(-0.01), Cd36(-0.02), Cltc(-0.02), Cav1(-0.12), Cd81(-0.17), Ptger3(-0.19), Tfrc(-0.26), Ache(-0.29)…
male gonad development	0.0664998	0.148677	0.00215108	0.0131442	64	0.561949	0.0165797	0.243289	0.0815398	0.0101856	Ercc1(0.62), Inhba(0.54), Sox9(0.41), Sox9(0.41), Sox9(0.41), Sox9(0.41), Nupr1(0.39), Sfrp2(0.38), Ago4(0.37), Hmga2(0.34), Bcl2l1(0.28), Cited2(0.27), Nkx3-1(0.27), Tgfbr1(0.27), Ubb(0.27), Jmjd1c(0.27), H3f3b(0.21), Ybx3(0.21), Insl3(0.19), Insl3(0.19), Arid5b(0.19), Wdr48(0.14), Smad4(0.13), Ren1(0.13), Tbc1d20(0.13), Eif2s2(0.12), Rhobtb3(0.12), Hmgb2(0.09), Wt1(0.08), Wt1(0.08), Bcl2l11(0.0…
negative regulation of bone mineralization	0.0808233	0.329362	0.00220593	0.0134562	11	0.258169	0.0460811	0.0700475	0.0428494	0.200665	Nfe2(1.62), Srgn(0.75), Sox9(0.41), Ccr1(0.4), Hif1a(0.24), Ptk2b(0.1), Ecm1(0.05), Trpm4(-0.02), Bcor(-0.02), Ltbp3(-0.18), Grem1(-0.18),
DNA-N1-methyladenine dioxygenase activity	0.076786	0.196671	0.00222253	0.0135341	32	0.0572923	0.364442	0.0601541	0.0153856	0.234854	Alkbh2(0.37), Hr(0.3), Jmjd1c(0.27), Jmjd6(0.17), Kdm6b(0.17), Kdm3a(0.14), Phf2(0.12), Kdm7a(0.1), 2410016O06Rik(0.09), Kdm5c(0.08), Kdm6a(0.07), Kdm5b(0.07), Alkbh4(0.06), Alkbh6(0.05), Ogfod2(0.03), Kdm5a(0.03), Kdm4b(0), Kdm3b(0), Alkbh8(-0.01), Mina(-0.02), Kdm4c(-0.02), Ogfod3(-0.03), Ogfod1(-0.03), Alkbh3(-0.06), Kdm4a(-0.08), Alkbh5(-0.09), Fto(-0.11), Fto(-0.11), P4htm(-0.12), Uty(-0.13)…
cell-cell junction	0.0234757	0.103577	0.00223835	0.0135994	192	0.198828	0.000365541	0.364498	0.00643121	0.758519	Cxcr4(0.48), Cdh5(0.45), Cdh5(0.45), Cldn5(0.45), Col13a1(0.41), Pdlim7(0.37), Cd53(0.36), Nectin2(0.35), Nectin2(0.35), Itga5(0.33), Ceacam2(0.33), Clic4(0.32), Actn1(0.3), Vsir(0.29), Rab10(0.27), Was(0.27), Dbn1(0.27), Dbn1(0.27), Cdh1(0.26), Cdh1(0.26), Cxadr(0.26), Cxadr(0.26), Rap1b(0.26), Itk(0.25), Slc2a1(0.25), Tec(0.24), Gja1(0.23), Itgb1(0.22), Nectin4(0.22), Stx3(0.21), Vav1(0.2), Grb…
aspartic endopeptidase activity, intramembrane cleaving	0.0715333	0.342105	0.00224095	0.0135994	11	0.0945871	0.44695	0.0573103	0.0222065	0.0932882	Asprv1(0.93), Psen1(0.18), H13(0.15), H13(0.15), Sppl3(0.14), Sppl3(0.14), Psen2(0.03), Sppl2a(-0.05), Sppl2a(-0.05), Napsa(-0.09), Sppl2b(-0.19),
positive regulation of cell adhesion mediated by integrin	0.0613073	0.319422	0.00226332	0.0136882	13	0.0503722	0.00209819	0.557022	0.0487621	0.370623	Itgb3(0.82), Syk(0.6), Cd24a(0.21), Cd24a(0.21), Adam9(0.08), Foxc2(0.06), Nckap1l(0.06), Rac3(0.05), Ift74(0.04), Ret(0), Tgfb2(0), Ptpn6(-0.04), Cib1(-0.06),
poly(U) RNA binding	0.0827324	0.266537	0.00227833	0.013754	17	0.0799482	0.0641438	0.103971	0.062701	0.2659	Msi1(0.64), Pabpc1(0.18), Atxn1(0.17), Rps7(0.15), Patl1(0.15), Rbm11(0.14), Rbm11(0.14), Hnrnpc(0.11), Mcrs1(0.08), Pabpc4(0.08), Cirbp(0.04), Fmr1(-0.02), Dis3l2(-0.03), Dis3l2(-0.03), Khdrbs1(-0.05), Pnpt1(-0.06), Msi2(-0.18),
regulation of cell growth	0.0792452	0.166323	0.00228196	0.013754	44	0.177658	0.0302008	0.112274	0.164051	0.0889066	Esm1(0.94), Csf2rb(0.8), Igfbp1(0.73), Igfbp3(0.67), Htra4(0.63), Ctgf(0.55), Cyr61(0.4), Tmc8(0.4), Socs2(0.38), Clstn3(0.38), Cd44(0.33), Pot1b(0.27), Hsd3b7(0.24), Il3ra(0.2), Mad2l2(0.18), Sbf1(0.15), Sgk1(0.14), Stk11(0.08), Tsg101(0.07), Nanos1(0.06), Igfbp7(0.03), Crim1(0.02), Cdc73(0.01), Uri1(0), Htra1(-0.02), Bap1(-0.03), Sgk3(-0.03), Fam107a(-0.03), Igfbp6(-0.05), Pttg1(-0.06), Clstn1(…
peptidyl-tyrosine phosphorylation	0.0407593	0.154148	0.0023437	0.0140902	78	0.112477	0.00154321	0.0300039	0.0356982	0.93737	Syk(0.6), Syk(0.6), Fgr(0.54), Fgr(0.54), Fes(0.33), Clk1(0.29), Pdgfb(0.25), Tec(0.24), Egfr(0.23), Flt4(0.23), Abl2(0.22), Abl2(0.22), Src(0.22), Src(0.22), Fyn(0.2), Fyn(0.2), Fyn(0.2), Flt1(0.19), Btk(0.17), Btk(0.17), Clk4(0.16), Hck(0.16), Jak2(0.16), Clk3(0.16), Ptk2(0.14), Ptk2(0.14), Ptk2(0.14), Pxn(0.14), Kit(0.12), Kit(0.12), Clk2(0.11), Dyrk1a(0.11), Dyrk1a(0.11), Pkdcc(0.11), Pkdcc(0…
regulation of microtubule-based process	0.0765415	0.294526	0.00234571	0.0140902	15	0.241309	0.336807	0.0412517	0.0181226	0.0855521	Tacc2(0.15), Cep120(0.13), Diaph1(0.12), Clasp2(0.11), Tacc1(0.1), Gsk3b(0.08), Gsk3b(0.08), Erbb2(0.03), Macf1(0.02), Apc(0.01), Memo1(0.01), Tacc3(-0.03), Klhl42(-0.04), Klhl42(-0.04), Map10(-0.23),
exit from mitosis	0.0837588	0.324524	0.00235422	0.0141173	11	0.0718933	0.265424	0.0146289	0.108077	0.207677	Ctdp1(0.31), Rpl24(0.28), Chmp2a(0.21), Chmp4b(0.18), Spast(0.16), Clasp2(0.11), Ube2s(0.11), Chmp7(0.08), Clasp1(0.03), Ube2c(-0.08), Eps8(-0.22),
regulation of translational initiation	0.0773404	0.242098	0.00238427	0.0142733	22	0.0218115	0.499547	0.0521202	0.0246291	0.241662	Eif4ebp1(0.32), Eif4a1(0.26), Impact(0.24), Ctif(0.19), Eif2b2(0.16), Eif5b(0.13), Eif5(0.12), Ppp1r15b(0.11), Eif2ak4(0.1), Eif4a2(0.08), Eif3b(0.08), Eif4g2(0.03), Eif4g2(0.03), Eif3k(-0.01), Eif2b1(-0.01), Eif4g1(-0.04), Gle1(-0.06), Ncbp1(-0.06), Mknk1(-0.08), Ncbp2(-0.08), Eif4ebp2(-0.13), Klhl25(-0.28),
poly(A) binding	0.0911263	0.308986	0.00240504	0.0143693	12	0.0376091	0.200512	0.073304	0.123695	0.140672	Paip2(0.24), Pabpc1(0.18), Rbpms(0.16), Pabpn1(0.13), Ddx3x(0.12), Pabpc4(0.08), Paip2b(0.08), Syncrip(0.06), Eif4a3(0.05), Khdrbs1(-0.05), Ddx1(-0.05), Zc3h14(-0.09),
positive regulation of interleukin-1 beta secretion	0.0155071	0.335882	0.00240842	0.0143693	23	0.0198349	0.00109264	0.663013	0.155698	0.277274	Ccr7(2.19), Casp4(0.2), P2rx7(0.16), P2rx7(0.16), Trim16(0.13), Ccr5(0.12), Ifnar1(0.12), Nlrp3(0.11), Nlrp3(0.11), Gsdmd(0.08), Panx1(0.03), Panx1(0.03), Hmgb1(0.01), Casp1(0), Casp1(0), Pycard(-0.08), Pycard(-0.08), Pycard(-0.08), Nod2(-0.14), Wnt5a(-0.27), Wnt5a(-0.27), Aim2(-0.33), Aim2(-0.33),
B cell homeostasis	0.0793521	0.212129	0.00241688	0.0143955	27	0.152716	0.183397	0.0826737	0.0153266	0.204734	Pirb(0.98), Casp3(0.28), Pik3cd(0.2), Ppp2r3c(0.13), Rc3h2(0.13), Ikbkg(0.1), Sos2(0.09), Rc3h1(0.09), Bak1(0.07), Bak1(0.07), Bcl2l11(0.07), Bcl2l11(0.07), Ahr(0.06), Ahr(0.06), Nckap1l(0.06), Sos1(0.04), Lyn(0.02), Bax(0.01), Bax(0.01), Ikbkb(-0.01), Bcl2(-0.06), Pkn1(-0.18), Mef2c(-0.29), Spns2(-0.34), Tnfrsf13b(-0.66), Tnfrsf13b(-0.66), Tnfsf13b(-0.78),
neuron projection development	0.0742332	0.105806	0.00243515	0.0144799	118	0.236704	0.0524321	0.00946956	0.0642323	0.464122	Cdk5r1(1.12), Il6(1.08), Gdnf(0.72), Btg2(0.48), Sema7a(0.47), Tnc(0.41), Gfra1(0.34), Cd44(0.33), Ager(0.28), Bloc1s2(0.26), Ngf(0.25), Itgb1(0.22), Nptxr(0.22), Manf(0.22), Cd24a(0.21), Cd24a(0.21), Stx3(0.21), Camsap1(0.2), Ncdn(0.19), Lamc1(0.19), Pld2(0.18), Rab11a(0.18), Rab35(0.18), Hdgfrp3(0.17), Zfyve27(0.17), Bloc1s4(0.15), Capzb(0.14), Shc1(0.14), Srf(0.14), Sept2(0.13), Ccdc64(0.13), …
protein geranylgeranylation	0.0816387	0.357136	0.00244568	0.0145181	10	0.29211	0.120638	0.0203311	0.197312	0.0469405	Chml(0.18), Chm(0.08), Rabggtb(0.07), Rabggtb(0.07), Fnta(0.06), Fnta(0.06), Pggt1b(-0.01), Pggt1b(-0.01), Rabggta(-0.11), Rabggta(-0.11),
positive regulation of interleukin-2 production	0.0643057	0.327382	0.00245102	0.0145255	12	0.147591	0.00537169	0.109131	0.0360405	0.63178	Pde4b(0.64), Cd83(0.43), Runx1(0.28), Runx1(0.28), Anxa1(0.2), Ripk2(0.14), Ccr2(0.12), Sash3(0.06), Traf2(-0.01), Prkd2(-0.02), Traf6(-0.04), Malt1(-0.04),
positive regulation of transcription from RNA polymerase II promoter in response to endoplasmic reticulum stress	0.0414367	0.311994	0.00246052	0.0145574	17	0.0201036	0.0471071	0.0428169	0.0458621	0.800184	Atf3(0.85), Cebpb(0.52), Atf4(0.45), Atf4(0.45), Creb3l1(0.11), Creb3l1(0.11), Atf6(0.09), Trp53(0.08), Mbtps2(0.07), Mbtps2(0.07), Ddit3(0.05), Ddit3(0.05), Ddit3(0.05), Atf6b(0.01), Eif2ak3(-0.04), Creb3l3(-0.55), Creb3l3(-0.55),
cell redox homeostasis	0.0817697	0.149365	0.00248431	0.0146736	59	0.176109	0.27484	0.0444116	0.125108	0.0286345	Il6(1.08), Glrx(0.9), Ero1lb(0.64), Sh3bgrl3(0.39), Txnrd1(0.3), Gclc(0.28), Txnl1(0.19), Qsox1(0.19), Pdia6(0.18), Glrx5(0.18), Txn1(0.17), Krit1(0.16), Krit1(0.16), Prdx1(0.14), Tmx4(0.11), Egln2(0.11), Nhlrc2(0.1), Nfe2l2(0.09), Txndc12(0.09), Erp44(0.09), Txndc9(0.09), Tmx1(0.08), Pdia3(0.07), Apex1(0.05), Ddit3(0.05), Prdx5(0.05), Dnajc10(0.03), P4hb(0.02), Pdilt(0.02), Prdx6(0), Gsr(0), Aif…
negative regulation of gene expression	0.0605971	0.0826468	0.00250481	0.0147455	184	0.25027	0.0359901	0.159826	0.0142863	0.268306	Ptpn22(0.83), Ptpn22(0.83), Serpine1(0.8), Nog(0.78), Il1b(0.74), Trp53inp1(0.66), Ucn2(0.64), Mbd1(0.57), Ctgf(0.55), Cdkn1a(0.54), Id3(0.53), Tgif1(0.49), Prdm1(0.43), Sox9(0.41), Ccr1(0.4), Sfrp2(0.38), Musk(0.36), Tiparp(0.33), Cited2(0.27), Nkx3-1(0.27), Xdh(0.27), Tgfb1(0.26), Pdgfb(0.25), Noct(0.24), Klf4(0.24), Prdm4(0.24), Gja1(0.23), Rel(0.23), Tfap4(0.23), Map2k1(0.22), Zfp281(0.22), F…
protein phosphatase type 2A regulator activity	0.0971981	0.284871	0.00251307	0.0147695	14	0.100575	0.133934	0.166039	0.0379351	0.126812	Ppp2r2a(0.31), Ppp2r1b(0.31), Ppp2r2d(0.25), Ppp2r3d(0.17), Igbp1(0.06), Igbp1(0.06), Ppp2r1a(0.06), Ppme1(0.06), Ppp2r5a(0.06), Ppp2r5c(-0.01), Ptpa(-0.06), Ptpa(-0.06), Ppp2r5e(-0.12), Ppp2r2b(-0.57),
histone acetyltransferase activity (H4-K5 specific)	0.0916273	0.297034	0.00258888	0.0151396	13	0.13508	0.162461	0.0278181	0.0846451	0.190497	Kansl2(0.25), Kansl2(0.25), Wdr5(0.12), Kansl1(0.11), Kansl1(0.11), Kat8(0.1), Kansl3(0.09), Mcrs1(0.08), Phf20(0.08), Phf20(0.08), Hcfc1(0.02), Ogt(-0.07), Kansl1l(-0.18),
histone acetyltransferase activity (H4-K8 specific)	0.0916273	0.297034	0.00258888	0.0151396	13	0.13508	0.162461	0.0278181	0.0846451	0.190497	Kansl2(0.25), Kansl2(0.25), Wdr5(0.12), Kansl1(0.11), Kansl1(0.11), Kat8(0.1), Kansl3(0.09), Mcrs1(0.08), Phf20(0.08), Phf20(0.08), Hcfc1(0.02), Ogt(-0.07), Kansl1l(-0.18),
histone acetyltransferase activity (H4-K16 specific)	0.0916273	0.297034	0.00258888	0.0151396	13	0.13508	0.162461	0.0278181	0.0846451	0.190497	Kansl2(0.25), Kansl2(0.25), Wdr5(0.12), Kansl1(0.11), Kansl1(0.11), Kat8(0.1), Kansl3(0.09), Mcrs1(0.08), Phf20(0.08), Phf20(0.08), Hcfc1(0.02), Ogt(-0.07), Kansl1l(-0.18),
chromosome organization	0.0564806	0.202073	0.0026138	0.0152601	37	0.149777	0.324871	0.0193113	0.0697684	0.113645	Ercc1(0.62), Gem(0.31), Pot1b(0.27), Pot1b(0.27), Pot1b(0.27), Cenpt(0.24), Lig4(0.22), Myc(0.18), Pelo(0.15), Rlf(0.15), Itpa(0.11), Trp53(0.08), Yy1(0.08), Ncaph2(0.07), Ctc1(0.07), Smc4(0.07), Dclre1c(0.04), Smc1a(0.02), Sfpq(0.02), Apc(0.01), Apc(0.01), Mre11a(0), Smc3(-0.02), Pot1a(-0.02), Smchd1(-0.04), Rad50(-0.05), Pttg1(-0.06), Blm(-0.07), Zfp830(-0.08), Nudt16(-0.08), Rad54l(-0.13), Rad…
positive regulation of JNK cascade	0.0736708	0.144529	0.00264299	0.0154051	64	0.0905926	0.00733811	0.156186	0.0644848	0.527614	Il1b(0.74), Il1b(0.74), Il1b(0.74), Ctgf(0.55), Gadd45b(0.47), Rassf2(0.42), Gadd45g(0.41), Tirap(0.3), Tlr4(0.28), Tlr4(0.28), Card9(0.24), Card9(0.24), Flt4(0.23), Wnt7a(0.22), Stk3(0.19), Gadd45a(0.18), Myd88(0.18), Dusp22(0.17), Ripk2(0.14), Axin1(0.13), Cdc42(0.12), Ltbr(0.12), Map3k11(0.12), Lmnb1(0.11), Map3k5(0.11), Hras(0.1), Ptk2b(0.1), F2rl1(0.09), Ripk1(0.09), Ripk1(0.09), Zfp622(0.08…
negative regulation of axon extension	0.0553543	0.279092	0.00265923	0.0154742	22	0.0389063	0.0037451	0.093978	0.0517523	0.875006	Cdk5r1(1.12), Sema3a(0.71), Sema3a(0.71), Sema3a(0.71), Ifrd1(0.41), Rtn4(0.35), Rtn4(0.35), Rtn4(0.35), Actr3(0.14), Ccr5(0.12), Rnf6(-0.04), Rnf6(-0.04), Rtn4r(-0.07), Arhgap4(-0.1), Ntn1(-0.13), Cdk5(-0.17), Nrp1(-0.23), Aatk(-0.29), Aatk(-0.29), Cdkl3(-0.32), Cdkl3(-0.32), Slit2(-0.44),
production of miRNAs involved in gene silencing by miRNA	0.0832639	0.315121	0.00266463	0.0154802	12	0.0849145	0.38842	0.0188002	0.0596131	0.174319	Ago4(0.37), Rbm3(0.2), Tarbp2(0.18), Snip1(0.15), Ago2(0.11), Ago2(0.11), Dicer1(0.05), Dicer1(0.05), Adar(0.03), Prkra(-0.03), Ago3(-0.1), Ago1(-0.14),
tRNA modification	0.0558026	0.318103	0.00269193	0.0156132	14	0.00068477	0.247592	0.163773	0.0801703	0.517081	Cdk5rap1(0.54), Wdr4(0.19), Qtrt1(0.17), Qtrtd1(0.14), Thumpd1(0.14), Trit1(0.09), Aars(0.09), Thg1l(0.06), Mettl1(0.03), Adat2(0.03), 2210016F16Rik(-0.03), Aars2(-0.03), Gtpbp3(-0.04), Trub1(-0.07),
patterning of blood vessels	0.0778825	0.184722	0.0027079	0.0156801	34	0.0257064	0.015401	0.116049	0.251077	0.403135	Edn1(0.76), Nrarp(0.5), Nrarp(0.5), Cxcr4(0.48), Sfrp2(0.38), Rbm15(0.22), Nfatc4(0.21), Notch4(0.2), Dll4(0.2), Flt1(0.19), Pitx2(0.17), Gna13(0.16), Srf(0.14), Ppp3r1(0.11), Sema3e(0.08), Col4a1(0.07), Ahr(0.06), Foxc2(0.06), Vegfa(0.06), Stk4(0.06), Nfatc3(0.05), Vangl2(0.04), Ednra(0.02), Tgfbr2(0.01), Acvr1(0), Ctnnb1(-0.03), Plxnd1(-0.03), Eng(-0.09), Ihh(-0.19), Nrp1(-0.23), Sema5a(-0.44),…
positive regulation of cytosolic calcium ion concentration involved in phospholipase C-activating G-protein coupled signaling pathway	0.0627803	0.302057	0.00275479	0.0159256	14	0.17054	0.00911553	0.244576	0.0950543	0.186292	P2ry10(1), Edn1(0.76), Drd1(0.57), S1pr1(0.56), Plcd1(0.22), Gpr4(0.22), Lpar6(0.13), Lpar1(0.11), Tgm2(0.07), Ednra(0.02), Gpr17(-0.15), F2r(-0.19), Agtr1a(-0.31), Lpar3(-0.65),
histone H4 acetylation	0.0960217	0.19442	0.00279295	0.0161198	32	0.130627	0.193711	0.0307275	0.139182	0.104824	Chd5(0.32), Per1(0.27), Morf4l2(0.25), Yeats4(0.21), Ruvbl2(0.16), Epc1(0.13), Trim16(0.13), Tada3(0.12), Msl3(0.11), Ep300(0.06), Ep300(0.06), Bend3(0.06), Morf4l1(0.05), Morf4l1(0.05), Dmap1(0.05), Dmap1(0.05), Ep400(0.04), Brd8(0.04), Apbb1(0.03), Actl6a(0.03), Tcf3(0.02), Ruvbl1(0.02), Trrap(0), Hat1(0), Ing3(-0.03), Msl3l2(-0.03), Naa60(-0.08), Elp3(-0.16), Ncoa1(-0.19), Elp4(-0.28), Elp4(-0…
methyl-CpG binding	0.0894811	0.250012	0.00281341	0.0162115	19	0.0946079	0.378067	0.0890797	0.0205331	0.11932	Mbd1(0.57), Mbd1(0.57), Mbd2(0.16), Mbd2(0.16), Lrwd1(0.14), Zbtb21(0.12), Zbtb4(0.1), Wdr77(0.09), Prmt5(0.03), Mecp2(0), Mecp2(0), Dnmt1(-0.01), Dnmt1(-0.01), Mbd3(-0.01), Mbd3(-0.01), Zbtb33(-0.01), Zbtb38(-0.01), Erh(-0.27), Uhrf1(-0.29),
positive regulation of cytokine production	0.0613991	0.252852	0.00284003	0.0163382	23	0.269731	0.00312471	0.272552	0.0127149	0.501456	Il1f9(1.34), Il1f6(0.97), Hilpda(0.74), Ereg(0.71), Nfam1(0.61), Slc11a1(0.21), Flot1(0.15), Sod1(0.14), Agpat2(0.12), Peli1(0.11), Tlr5(0.08), Tlr3(0.07), Havcr2(0.06), Tmf1(0), Adra2a(-0.05), Eif2ak2(-0.06), Agpat1(-0.06), Lurap1(-0.18), Ccdc88b(-0.21), Gata3(-0.26), Tnf(-0.26), Wnt5a(-0.27), Lgals9(-0.4),
ESCRT I complex	0.0989859	0.316854	0.00286973	0.0164823	12	0.0654388	0.0431565	0.112087	0.276355	0.126795	Ubap1(0.22), Ubap1(0.22), Vps37d(0.16), Vps37c(0.15), Vps37a(0.09), Tsg101(0.07), Tsg101(0.07), Mvb12b(0.07), Vps37b(-0.01), Vps28(-0.03), Vps28(-0.03), Mvb12a(-0.08),
T-helper 1 type immune response	0.0763187	0.343611	0.00288784	0.0165595	11	0.0767169	0.0657545	0.054548	0.235467	0.18057	Tlr6(0.77), Relb(0.48), Il18(0.25), Il18(0.25), Nras(0.25), Hras(0.1), Vegfa(0.06), Bcl3(0.05), Traf6(-0.04), Il18bp(-0.08), Il18bp(-0.08),
negative regulation of apoptotic signaling pathway	0.0795134	0.208703	0.00294677	0.01687	27	0.177911	0.231729	0.0209884	0.00997493	0.444416	Hspb1(0.9), Hsph1(0.79), Nog(0.78), Bmf(0.44), Nr4a2(0.32), Psen1(0.18), Ing2(0.17), Pcgf2(0.12), Cdk11b(0.11), Igbp1(0.06), Map3k7(0.06), Map3k7(0.06), Meis3(0.05), Psen2(0.03), Madd(0.02), Bax(0.01), Mkl1(0.01), Tmbim6(-0.02), Ctnnb1(-0.03), Ctnnb1(-0.03), Mnt(-0.03), Bmi1(-0.04), Bcl2(-0.06), Bcl2(-0.06), Cth(-0.21), Pam16(-0.36), Wnt4(-0.98),
negative regulation of fibroblast growth factor receptor signaling pathway	0.0773089	0.293084	0.00297212	0.0169877	15	0.278192	0.00797248	0.035348	0.264276	0.237295	Sulf1(0.47), Sulf1(0.47), Sulf1(0.47), Thbs1(0.36), Spry2(0.3), Spry2(0.3), Fgfrl1(0.17), Gpc1(0.11), Spry1(-0.05), Sulf2(-0.11), Tcf7l2(-0.13), Wnt5a(-0.27), Shisa2(-0.35), Ngfr(-0.83), Wnt4(-0.98),
histone methylation	0.0781151	0.242627	0.00300789	0.0171644	24	0.0366157	0.158214	0.101072	0.0427841	0.361532	Ezh2(0.18), Prmt2(0.17), Prmt2(0.17), Smyd2(0.08), Whsc1l1(0.08), Kmt5b(0.07), Eed(0.05), Fbl(0.05), Carm1(0.02), Carm1(0.02), Ehmt1(0.02), Prmt6(0.02), Men1(0.01), Mecp2(0), Prmt7(-0.01), Nsd1(-0.02), Kmt5c(-0.04), Suz12(-0.07), Ehmt2(-0.08), Ehmt2(-0.08), Kmt2c(-0.12), Satb1(-0.17), Prdm9(-0.2), Prdm9(-0.2),
regulation of fibroblast migration	0.075169	0.324348	0.00302513	0.017235	11	0.0190144	0.227776	0.387608	0.00665602	0.288933	Sdc4(0.34), Rac1(0.3), Rffl(0.18), Mta2(0.13), Coro1c(0.08), Rcc2(0.08), Prr5l(0.06), Prr5l(0.06), Fer(-0.03), Gna12(-0.07), Wdpcp(-0.07),
alditol:NADP+ 1-oxidoreductase activity	0.0705942	0.378147	0.00304304	0.0173091	11	0.108305	0.178671	0.0455203	0.532494	0.00890977	Akr1b7(1.2), Akr1c21(0.71), Akr1b8(0.66), Akr1b3(-0.01), Akr1b3(-0.01), Akr1a1(-0.04), Akr1a1(-0.04), Akr1a1(-0.04), Akr7a5(-0.06), Akr1b10(-0.09), Akr1c18(-0.1),
positive regulation of stem cell proliferation	0.0460282	0.332492	0.00305151	0.0173295	13	0.214018	0.00288454	0.0411861	0.0441815	0.80583	Hmga2(0.34), Kdm1a(0.27), Ngf(0.25), Ptprc(0.24), Taf4b(0.24), Nfya(0.19), Setd1a(0.17), Epcam(0.14), Tert(0.1), Hdac5(0.06), Sirt6(0.03), Tbx3(-0.08), Sox11(-0.37),
CCR4-NOT complex	0.0795816	0.265881	0.00307965	0.0174612	18	0.132124	0.147611	0.00651738	0.170668	0.298922	Patl1(0.15), Cnot9(0.12), Cnot7(0.11), Cnot7(0.11), Cnot11(0.11), Tnks1bp1(0.1), Cnot3(0.1), Cnot2(0.09), Cnot8(0.08), Cnot8(0.08), Cnot4(0.07), Cnot4(0.07), Cnot6(0.02), Cnot6l(-0.07), Tob1(-0.08), Cnot10(-0.08), Cnot1(-0.11), Cpeb3(-0.65),
regulation of angiogenesis	0.0731085	0.22218	0.00308772	0.017479	27	0.0599233	0.0110543	0.102981	0.0904742	0.626818	Serpine1(0.8), Adora2b(0.67), Angpt2(0.46), Epha2(0.43), Tnfrsf12a(0.4), Emp2(0.37), Efna1(0.35), Itga5(0.33), Mapk7(0.2), Rnh1(0.18), Id1(0.15), Ptk2b(0.1), Vash2(0.08), Ets1(0.06), Wars(0.03), Plxnd1(-0.03), Tspan12(-0.04), Egln1(-0.05), Nf1(-0.09), Nf1(-0.09), Enpp2(-0.12), Htatip2(-0.12), Htatip2(-0.12), Vash1(-0.21), Adgra2(-0.46), Prok1(-0.56), Tek(-0.59),
AU-rich element binding	0.0721837	0.251155	0.00310444	0.0175455	19	0.172254	0.117497	0.182746	0.0170226	0.168096	Zfp36(0.41), Zfp36(0.41), Zfp36l1(0.31), Mex3d(0.24), Exosc8(0.14), Exosc8(0.14), Elavl1(0.13), Hnrnpa0(0.11), Hnrnpa0(0.11), Tial1(0.07), Exosc4(0.04), Zfp36l2(0), Exosc7(-0.03), Exosc9(-0.04), Exosc9(-0.04), Tia1(-0.07), Apobec1(-0.08), Nudt21(-0.11), Dnd1(-0.23),
transcriptional activator activity, RNA polymerase II distal enhancer sequence-specific binding	0.0804225	0.235646	0.0031204	0.0176076	21	0.130402	0.0212899	0.0179241	0.202329	0.487619	Hmga1(0.59), Arid3b(0.51), Rela(0.36), Nfkb1(0.24), Rel(0.23), Nfatc1(0.14), Spi1(0.13), Bach1(0.1), Fubp1(0.1), Nfe2l2(0.09), Nfe2l1(0.08), Tardbp(0.04), Hcfc1(0.02), Tcf3(0.02), Cux1(0.01), Pbx3(0.01), Sub1(0.01), Zeb2(0.01), Hoxb5(-0.06), Mef2c(-0.29), Scx(-0.4),
dolichyl-diphosphooligosaccharide-protein glycotransferase activity	0.0728203	0.425092	0.00313555	0.0176574	10	0.0769034	0.0758693	0.716761	0.00929765	0.0705346	Krtcap2(0.06), Rpn2(0.04), Dad1(0.03), Rpn1(-0.02), Ddost(-0.05), Stt3b(-0.06), Stt3b(-0.06), Stt3a(-0.08), Stt3a(-0.08), Magt1(-0.08),
telomerase holoenzyme complex	0.0744991	0.249968	0.0031392	0.0176574	20	0.0462494	0.223354	0.197156	0.00805724	0.341092	Ptges3(0.19), Lsm11(0.18), Smg5(0.16), Snrpb(0.13), Nop10(0.13), Nhp2(0.12), Hnrnpc(0.11), Tert(0.1), Wrap53(0.09), Dkc1(0.08), Hnrnpu(0.05), Gnl3l(0.05), Nat10(0.04), Hmbox1(-0.02), Smg7(-0.05), Snrpd3(-0.06), Nvl(-0.06), Smg6(-0.11), Tep1(-0.21), Tep1(-0.21),
endocytosis	0.0977281	0.0868514	0.00315039	0.0176817	172	0.110269	0.28575	0.0472602	0.0408613	0.182856	Snx10(1.16), Arc(0.61), 3110043O21Rik(0.4), 3110043O21Rik(0.4), Pstpip1(0.33), Csnk1e(0.33), Npc1(0.3), Rac1(0.3), Rabgef1(0.28), Pacsin3(0.28), Bin1(0.26), Lmbr1l(0.26), Rabep2(0.24), Ldlrap1(0.24), March3(0.24), Nostrin(0.24), Dab2(0.23), Hip1r(0.22), Snx1(0.21), Snx18(0.21), Snx18(0.21), Arrb2(0.21), Cln3(0.2), Csnk1d(0.2), Esyt2(0.19), Trip10(0.19), Wipf2(0.18), Tnk2(0.17), Necap1(0.17), Snx1…
regulation of apoptotic process	0.0762439	0.0920282	0.00315352	0.0176817	159	0.0249006	0.0167147	0.212433	0.0987927	0.526901	Sell(1.11), Il6(1.08), Bmp8b(1), Dusp1(0.83), Relt(0.74), Irak3(0.72), Pmaip1(0.65), Rassf3(0.59), Inhba(0.54), Egr1(0.48), Tnfrsf26(0.48), Birc3(0.44), Bmp8a(0.44), Rassf2(0.42), Pax8(0.4), Sfrp2(0.38), Robo4(0.38), Apaf1(0.34), Bcl10(0.32), Sdf2l1(0.31), Dedd2(0.3), Bcl2l1(0.28), Cflar(0.27), Tgfb1(0.26), Gdf15(0.26), Traf3(0.25), Card9(0.24), Sra1(0.23), Casp4(0.2), Fyn(0.2), Card19(0.2), Nae1…
SMAD protein signal transduction	0.0816023	0.15789	0.00319955	0.0179114	54	0.435018	0.00636416	0.065224	0.136025	0.20291	Inhbb(1.02), Bmp8b(1), Fos(0.81), Inhba(0.54), Jun(0.46), Bmp8a(0.44), Smad1(0.42), Trf(0.37), Smad3(0.35), Tgfb1(0.26), Gdf15(0.26), Lefty1(0.19), Rbm14(0.17), Nup93(0.16), Nup93(0.16), Bmp6(0.14), Bmp6(0.14), Smad4(0.13), Vim(0.12), Bmp2(0.11), Bmp2(0.11), Btbd11(0.1), Smad9(0.08), Smad2(0.07), Tgfb3(0.07), Smad5(0.06), Meg3(0.03), Sub1(0.01), Tgfb2(0), Afp(-0.01), Hipk2(-0.01), Ski(-0.01), Lnp…
BMP signaling pathway	0.061337	0.155341	0.00323094	0.0180585	77	0.728495	0.0121571	0.0188715	0.235414	0.049777	Zcchc12(1.11), Bmp8b(1), Nog(0.78), Egr1(0.48), Bmp8a(0.44), Smad1(0.42), Smad1(0.42), Smad1(0.42), Smad1(0.42), Smad1(0.42), Hfe(0.39), Vsir(0.29), Smurf1(0.29), Zcchc18(0.28), Fam83g(0.23), Smad6(0.18), Id1(0.15), Bmp6(0.14), Bmp6(0.14), Bmp6(0.14), Smad4(0.13), Smad4(0.13), Bmp2(0.11), Bmp2(0.11), Bmp2(0.11), Bmpr1a(0.11), Bmpr1a(0.11), Bmpr1a(0.11), Bmpr1a(0.11), Bmpr2(0.09), Bmpr2(0.09), Tws…
ubiquitin-specific protease binding	0.0742835	0.326801	0.00326549	0.0182229	15	0.0279344	0.529149	0.0255173	0.0646511	0.219225	Vcp(0.17), Vcp(0.17), Amfr(0.09), Amfr(0.09), Syvn1(0.08), Syvn1(0.08), Bag6(0.07), Sart3(0.06), Chmp3(0.06), Derl1(0.02), Park7(0.01), Vimp(0), March6(-0.01), Rad23a(-0.12), Park2(-0.42),
chromosome, telomeric region	0.0909953	0.1755	0.00329005	0.018331	47	0.199252	0.318733	0.04869	0.0190144	0.151864	H2afx(0.28), Ndnl2(0.19), Smc5(0.18), Terf1(0.16), Nsmce2(0.14), Lrwd1(0.14), Pinx1(0.13), Cdk2(0.12), Tinf2(0.12), Tinf2(0.12), Rpa2(0.11), Tert(0.1), Thoc7(0.1), Setx(0.1), Smc6(0.08), Rad17(0.07), Ctc1(0.07), Tnks2(0.07), Obfc1(0.07), Ten1(0.06), Terf2(0.02), Dclre1b(0.02), Dclre1b(0.02), Mre11a(0), Atrx(-0.02), Rif1(-0.02), Dhx36(-0.02), Pot1a(-0.02), Nbn(-0.03), Terf2ip(-0.03), Terf2ip(-0.03…
regulation of actin filament polymerization	0.0798006	0.221779	0.00329661	0.0183387	23	0.179249	0.00381217	0.242591	0.14637	0.230211	Pak3(0.85), Arpc1b(0.32), Fchsd1(0.32), Dbn1(0.27), Arpc5(0.24), Arpc3(0.23), Baiap2l1(0.22), Hax1(0.2), Arpc2(0.17), Pfn2(0.16), Hcls1(0.12), Arpc1a(0.06), Fchsd2(0.05), Lats1(0.03), Arpc5l(0.02), Rasa1(-0.04), Coro1a(-0.05), Pik3r2(-0.1), Pfn3(-0.12), Ppp1r9a(-0.18), Prex1(-0.21), Eln(-0.3), Arhgap18(-0.39),
mRNA cleavage and polyadenylation specificity factor complex	0.0841487	0.282105	0.00330704	0.0183678	19	0.026749	0.167278	0.240853	0.0508461	0.201489	Pip5k1a(0.16), Wdr33(0.16), Cpsf4(0.15), Cpsf4(0.15), Tut1(0.14), Fip1l1(0.1), Cpsf2(0.08), Cpsf2(0.08), Csnk1a1(0.04), Ssu72(0.03), Cpsf1(-0.03), Cpsf1(-0.03), Cpsf3(-0.06), Cpsf3(-0.06), Cstf2(-0.08), Cstf2(-0.08), Cstf2t(-0.12), Zc3h3(-0.41), Cpsf4l(-0.67),
RNA polymerase II transcription corepressor activity	0.101501	0.241151	0.00331549	0.0183859	19	0.0690999	0.152979	0.0800975	0.21251	0.0865808	Cited2(0.27), Tle1(0.25), Sin3b(0.19), Tfap2a(0.18), Tcerg1(0.13), Rbbp8(0.11), Zfp451(0.08), Ctbp1(0.07), Hdac1(0.07), Sin3a(0.05), Hdgf(0.04), Uri1(0), Uri1(0), Phf12(-0.04), N4bp2l2(-0.05), Uxt(-0.06), Heyl(-0.17), Rere(-0.21), Tfap2b(-0.27),
AMP-activated protein kinase activity	0.088313	0.221781	0.00333233	0.0184504	25	0.257136	0.164106	0.266098	0.0223012	0.0356293	Prkab2(0.28), Prkab2(0.28), Grk2(0.26), Coq8b(0.2), Grk6(0.18), Alpk1(0.18), Prkab1(0.15), Prkab1(0.15), Prkag1(0.11), Prkag1(0.11), Grk3(0.1), Grk5(0.09), Prkaa1(0.02), Prkaa1(0.02), Prkaa1(0.02), Adck5(-0.1), Adck2(-0.11), Prkag2(-0.11), Prkag2(-0.11), Adck1(-0.17), Prkaa2(-0.17), Prkaa2(-0.17), Prkaa2(-0.17), Prkaa2(-0.17), Prkag3(-0.77),
nuclear exosome (RNase complex)	0.0711816	0.333302	0.00334785	0.0184875	16	0.00265489	0.557465	0.212001	0.0509424	0.162312	Exosc8(0.14), Exosc10(0.09), Mphosph6(0.08), Exosc1(0.05), Exosc4(0.04), Exosc3(0), Exosc3(0), Dis3(-0.02), Dis3(-0.02), Dis3l(-0.02), Exosc7(-0.03), Dis3l2(-0.03), Exosc2(-0.03), Exosc9(-0.04), Exosc9(-0.04), Exosc5(-0.12),
Golgi vesicle transport	0.105143	0.284298	0.00334949	0.0184875	14	0.0926561	0.134775	0.227312	0.0587092	0.0932708	Rab31(0.14), Trappc5(0.11), Stx6(0.1), Arl1(0.09), Golph3(0.08), Uso1(0.07), Spire1(0.06), Golga5(0.05), Cyth3(0.03), Rint1(0), Golph3l(-0.02), Arcn1(-0.06), Trappc3(-0.08), Prkd1(-0.21),
oligosaccharyltransferase complex	0.0724003	0.399221	0.00335864	0.0185091	11	0.200054	0.0585591	0.69324	0.00917682	0.0359936	Ostc(0.1), Ostc(0.1), Krtcap2(0.06), Rpn2(0.04), Dad1(0.03), Rpn1(-0.02), Stt3b(-0.06), Stt3a(-0.08), Magt1(-0.08), Magt1(-0.08), Tusc3(-0.1),
lipopolysaccharide binding	0.0756311	0.285965	0.00340493	0.0187258	16	0.427563	0.0145902	0.0346166	0.257791	0.11121	Cd14(1.38), Hspd1(0.28), Hspd1(0.28), Tlr4(0.28), Tlr4(0.28), Selp(0.25), Psma1(0.18), P2rx7(0.16), Psmb4(0.11), Scarb1(0.06), Tlr2(-0.01), Ptafr(-0.05), Drosha(-0.06), Lbp(-0.24), Lbp(-0.24), Tril(-0.54),
neural tube closure	0.0893698	0.111076	0.00350197	0.0192092	94	0.0846606	0.154124	0.0975846	0.0196096	0.390008	Nog(0.78), Tgif1(0.49), Sema4c(0.42), Sfrp2(0.38), Mthfd1l(0.38), Apaf1(0.34), Sdc4(0.34), Bcl10(0.32), Cecr2(0.32), Cecr2(0.32), St14(0.29), Cited2(0.27), Rock2(0.23), Fzd3(0.21), Fzd6(0.18), Tfap2a(0.18), Vasp(0.17), Sec24b(0.17), Sec24b(0.17), Stil(0.16), Rala(0.16), Cobl(0.15), Rps7(0.15), Adm(0.13), Tmed2(0.13), Cluap1(0.13), Shroom3(0.11), Pfn1(0.1), Ptch1(0.09), Tulp3(0.09), Spint1(0.08), …
response to pain	0.0986938	0.339164	0.00351099	0.0192289	10	0.278112	0.138215	0.12621	0.0649071	0.0453388	Tac1(1.42), Calca(0.84), Gch1(0.83), Cacna1a(0.49), Ednrb(0.06), Ret(0), Prkcg(-0.11), Comt(-0.23), Reln(-0.36), Kcnip3(-0.47),
gastrulation	0.0839143	0.20066	0.00353325	0.0193209	28	0.0216182	0.160274	0.0660905	0.306469	0.159361	Eomes(0.57), Smad3(0.35), Txnrd1(0.3), Rps6(0.28), Rps6(0.28), Nr4a3(0.27), Hira(0.18), Srf(0.14), Smad4(0.13), Syf2(0.13), Ric8a(0.12), Nat8f1(0.1), Rack1(0.08), Trp53(0.08), Smad2(0.07), Cul3(0.06), Sox17(0.02), Tcf3(0.02), Tgfbr2(0.01), Supt20(0.01), Acvr1(0), Ext1(-0.02), Htt(-0.06), Arfrp1(-0.06), Dld(-0.11), Nat8f5(-0.28), Nat8f2(-0.5), Aplnr(-1.8),
cellular response to transforming growth factor beta stimulus	0.0624308	0.173843	0.00354194	0.0193386	46	0.161444	0.00694108	0.307931	0.0268078	0.443952	Serpine1(0.8), Nos3(0.53), Sox9(0.41), Sox9(0.41), Apaf1(0.34), Zfp36l1(0.31), Pdcd5(0.31), Runx1(0.28), Tgfbr1(0.27), Tgfbr1(0.27), Dbn1(0.27), Tgfb1(0.26), Tgfb1(0.26), Ankrd1(0.24), Dab2(0.23), Src(0.22), Fyn(0.2), Mapk7(0.2), Ppm1a(0.17), Ptk2(0.14), Actr3(0.14), Usp9x(0.04), Smad7(0.02), Smad7(0.02), Yes1(0.01), Zfp36l2(0), Dnmt1(-0.01), Col4a2(-0.03), Stk16(-0.05), Stk16(-0.05), Akr1c18(-0.…
myeloid cell differentiation	0.0971103	0.206316	0.00357549	0.0194916	26	0.0870459	0.152934	0.0389883	0.0876865	0.303756	Ccr1(0.4), Prkx(0.36), Bcl6b(0.34), Tirap(0.3), Plscr1(0.24), Dab2(0.23), Cbfb(0.22), Cdkn1c(0.22), Jak2(0.16), Pml(0.13), Thpo(0.1), Kat8(0.1), Tal1(0.09), Tal1(0.09), L3mbtl3(0.08), L3mbtl3(0.08), Pir(0.06), Clec5a(0.04), Hoxb7(-0.03), Irf8(-0.09), Kat6a(-0.09), Prdx3(-0.1), Cebpa(-0.18), Tet2(-0.2), Tet2(-0.2), Stap1(-0.58),
protein disulfide oxidoreductase activity	0.0942371	0.241959	0.0036271	0.0197426	20	0.0749949	0.336352	0.159218	0.179536	0.0129771	Glrx(0.9), Ero1lb(0.64), Sh3bgrl3(0.39), Txnl1(0.19), Glrx5(0.18), Txn1(0.17), Gfer(0.05), Gfer(0.05), Dnajc10(0.03), Dnajc10(0.03), Ero1l(-0.01), Chchd4(-0.01), Txn2(-0.07), Txn2(-0.07), Glrx2(-0.08), Gstk1(-0.08), Enox2(-0.09), Txnrd3(-0.1), Ptges2(-0.12), Glrx3(-0.14),
RISC complex	0.0868712	0.312806	0.00363401	0.0197498	12	0.0828772	0.491559	0.094546	0.0137054	0.140903	Ago4(0.37), Tarbp2(0.18), Eif4e(0.14), Ago2(0.11), Ago2(0.11), Limd1(0.09), Ddx6(0.06), Dicer1(0.05), Dcp2(0.03), Snd1(-0.01), Ago3(-0.1), Ago1(-0.14),
interleukin-1-mediated signaling pathway	0.0922641	0.26377	0.00364648	0.0197872	16	0.108955	0.161806	0.036802	0.208904	0.118748	Irak3(0.72), Irak3(0.72), Egr1(0.48), Il1r1(0.18), Tnip2(0.17), Irak2(0.11), Irak2(0.11), Irak1(0.07), Irak1(0.07), Rps6ka4(0.07), Mapk3(0.03), Ikbkb(-0.01), Rps6ka5(-0.01), Traf6(-0.04), Traf6(-0.04), Plcb1(-0.52),
erythrocyte homeostasis	0.087057	0.309999	0.00368294	0.0199544	12	0.0210174	0.0301599	0.186993	0.119688	0.493982	Hmox1(0.61), Ampd3(0.53), Klf2(0.38), Rps17(0.2), Prdx1(0.14), Axin1(0.13), Hoxb6(0.09), Rps24(0.08), Ireb2(0.01), Gpi1(-0.09), Axl(-0.15), Axl(-0.15),
growth cone	0.0733189	0.110339	0.00369139	0.0199618	111	0.0153872	0.0984897	0.0987713	0.0214491	0.780207	Cdk5r1(1.12), Clu(0.67), Cxcr4(0.48), Crmp1(0.47), Cpeb1(0.34), Csnk1e(0.33), Kif3c(0.31), Klc1(0.3), Tpm3(0.28), Dbn1(0.27), Cxadr(0.26), Itga3(0.26), Twf2(0.25), Arpc3(0.23), Map1b(0.22), Stx3(0.21), Snx18(0.21), Sirt1(0.2), Ighmbp2(0.19), Katnb1(0.19), Fscn1(0.18), Fscn1(0.18), Psen1(0.18), Zpr1(0.17), Tnk2(0.17), Ppp1r2(0.17), Arpc2(0.17), Calm2(0.16), Ptbp2(0.16), Orai2(0.16), Calm1(0.15), D…
regulation of blood vessel size	0.0851063	0.284674	0.00369862	0.0199618	14	0.176629	0.0296527	0.0399048	0.4354	0.103751	Kng1(0.89), Edn1(0.76), Nos3(0.53), Gclc(0.28), Nppb(0.26), Foxc1(0.19), Ahr(0.06), Foxc2(0.06), Edn3(0.01), Cbs(-0.02), Itgb1bp1(-0.02), Tgfbr3(-0.03), Gclm(-0.07), Npr1(-0.24),
regulation of mitophagy	0.0785979	0.221802	0.00370122	0.0199618	26	0.0408298	0.313469	0.0110146	0.300725	0.171253	Csnk2a2(0.23), Fzd5(0.18), Srebf1(0.18), Usp36(0.18), Zdhhc8(0.17), Map1lc3b(0.16), Wdr75(0.16), Gsk3a(0.1), Bnip3l(0.08), Cttn(0.08), Wbp11(0.07), Atg7(0.06), Zbtb17(0.05), Actl6a(0.03), Ruvbl1(0.02), Dnm1l(0.02), Srebf2(0.01), U2af2(0.01), Fbxw7(0), Parl(-0.02), Polr3a(-0.03), Rpl28(-0.06), Kat2a(-0.08), Vdac1(-0.13), Ctsk(-0.19), Slc17a9(-0.59),
positive regulation of ubiquitin-protein transferase activity	0.093545	0.240864	0.00373204	0.0200973	19	0.179178	0.145057	0.0758218	0.132969	0.0721747	Trib1(0.55), Arrdc3(0.42), Arrdc4(0.36), Dcun1d5(0.18), Trib3(0.18), Axin1(0.13), Axin1(0.13), Dcun1d3(0.11), Ube2l3(0.08), Topors(0.08), Dcun1d1(0.03), Fbxw7(0), Pin1(-0.01), Stub1(-0.03), Dcun1d2(-0.06), Ube2n(-0.08), Trib2(-0.09), Dcun1d4(-0.32), Plk1(-0.34),
response to molecule of bacterial origin	0.0691113	0.331923	0.00377123	0.0202775	12	0.482276	0.00747838	0.477709	0.00780043	0.153238	Cxcl2(1.86), Cd14(1.38), Cxcl1(0.59), Cd24a(0.21), Tnfaip3(0.15), Tnfaip3(0.15), H2-M3(0.06), B2m(0.04), Tlr2(-0.01), Malt1(-0.04), Tap2(-0.09), Tlr9(-0.41),
positive regulation of protein targeting to mitochondrion	0.0876664	0.131237	0.00379353	0.0203411	66	0.0166176	0.118546	0.111545	0.0849429	0.473025	Hspa1l(0.53), Ugcg(0.52), Rhou(0.45), Mis18a(0.3), Arih2(0.24), Csnk2a2(0.23), Rac2(0.23), Ube2j2(0.21), Pemt(0.19), Fzd5(0.18), Ept1(0.18), Tomm7(0.18), Usp36(0.18), Zdhhc8(0.17), Psmd8(0.17), Atg13(0.16), Ube2d3(0.16), Wdr75(0.16), Elmod1(0.16), Nkap(0.15), Snip1(0.15), Sh3glb1(0.12), Psmb7(0.11), Gsk3a(0.1), Ube2l3(0.08), Cdkl2(0.08), Wbp11(0.07), Npepps(0.06), Zbtb17(0.05), Actl6a(0.03), Ruvb…
membrane fusion	0.098034	0.201331	0.00379927	0.0203411	27	0.219523	0.217039	0.0176017	0.0978996	0.155455	Dcstamp(0.79), Dcstamp(0.79), Adam8(0.42), Napb(0.33), Stx3(0.21), Chp1(0.2), Nsfl1c(0.19), Nsfl1c(0.19), Anxa7(0.18), Hace1(0.17), Vps33b(0.11), Stx4a(0.07), Uso1(0.07), Uso1(0.07), Vamp2(0.05), Napa(0.05), Vamp8(0.02), Dnm1l(0.02), Dnm1l(0.02), Dnm2(0.01), Napg(0.01), Bloc1s6(-0.04), Ubxn2a(-0.05), Snap23(-0.12), Ubxn2b(-0.22), Dnm1(-0.33), Dnm3(-0.59),
heterochromatin	0.0890481	0.170442	0.00380031	0.0203411	39	0.0718753	0.0864613	0.287868	0.0516626	0.169697	Mbd1(0.57), Chd5(0.32), Phc2(0.22), Rrp1b(0.2), Daxx(0.18), Tcp1(0.17), Mbd2(0.16), Hsf1(0.14), Rnf2(0.14), Orc2(0.13), Orc2(0.13), Suv39h1(0.13), Suv39h1(0.13), Hdac1(0.07), Ddx6(0.06), Hdac2(0.05), Cbx2(0.04), Uba1(0.03), Smarcad1(0.01), Mecp2(0), Mecp2(0), Dnmt1(-0.01), Mbd3(-0.01), Top2b(-0.01), Dnmt3b(-0.02), Smarca4(-0.02), Atrx(-0.02), Bmi1(-0.04), Cbx7(-0.06), Cbx5(-0.1), Sumo1(-0.11), Cb…
myeloid cell homeostasis	0.0798608	0.334229	0.00381381	0.0203775	11	0.0799462	0.0187001	0.14675	0.0305617	0.671396	Il6(1.08), Fancc(0.19), Fancc(0.19), Sod1(0.14), Sod1(0.14), Bak1(0.07), Bcl2l11(0.07), Itpkb(0.07), Nckap1l(0.06), Ncstn(0.02), Bax(0.01),
cAMP catabolic process	0.0507167	0.324773	0.00381862	0.0203775	15	0.919464	0.025711	0.0992072	0.0074343	0.0448436	Pde4b(0.64), Pde4b(0.64), Pde10a(0.31), Pde3b(0.28), Pde4d(0.28), Pde4d(0.28), Pde1b(0.15), Pde2a(0.07), Pde2a(0.07), Pde3a(0.03), Pde1c(-0.02), Pde4a(-0.27), Pde4a(-0.27), Pde1a(-0.29), Pde4c(-0.62),
ribonucleoprotein complex binding	0.0902726	0.208031	0.00387134	0.0206234	34	0.329794	0.096527	0.176215	0.00863774	0.183504	Rnasel(0.28), Rpl35(0.21), Ezh2(0.18), Smg5(0.16), Rpl35a(0.12), Hnrnpc(0.11), Ppih(0.06), Hnrnpu(0.05), Cd2bp2(0.05), Secisbp2(0.05), Eif4a3(0.05), Ppp1ca(0.04), Prmt5(0.03), Pqbp1(0.03), Prpf6(0.03), Uhmk1(0), Top2b(-0.01), Prmt7(-0.01), Bop1(-0.04), Hnrnpk(-0.04), Prpf31(-0.04), Ckap5(-0.05), Smg7(-0.05), Phf6(-0.07), Apobec1(-0.08), Timm50(-0.08), Secisbp2l(-0.08), Smg6(-0.11), Smg6(-0.11), E…
eukaryotic translation initiation factor 2alpha kinase activity	0.0912986	0.259094	0.00387636	0.0206234	18	0.349226	0.0570905	0.151606	0.0283556	0.146471	Grk2(0.26), Coq8b(0.2), Grk6(0.18), Alpk1(0.18), Eif2ak4(0.1), Eif2ak4(0.1), Eif2ak4(0.1), Eif2ak4(0.1), Grk3(0.1), Grk5(0.09), Eif2ak1(-0.03), Eif2ak3(-0.04), Eif2ak3(-0.04), Eif2ak3(-0.04), Eif2ak2(-0.06), Adck5(-0.1), Adck2(-0.11), Adck1(-0.17),
contractile fiber	0.102554	0.288966	0.00393617	0.0209102	13	0.198318	0.0243809	0.222302	0.0946549	0.147559	Cdk5r1(1.12), Hspb1(0.9), Tnnc1(0.54), Gja1(0.23), Cryab(0.18), Ppp1r12a(0.14), Cst3(0.02), Plec(0.02), Dek(0.02), Dbi(-0.01), Des(-0.11), Trim63(-0.28), Neb(-0.88),
negative regulation of innate immune response	0.0796339	0.293811	0.00400137	0.0212114	13	0.436526	0.00370065	0.188607	0.0473846	0.29524	Acod1(1.34), Irak3(0.72), Ccr1(0.4), Tyro3(0.24), Trafd1(0.23), Tnfaip3(0.15), Havcr2(0.06), Mul1(0.04), Nmi(0.03), Nlrx1(-0.1), Dhx58(-0.2), Dhx58(-0.2), Smpdl3b(-0.24),
gap junction	0.0604633	0.243371	0.00405472	0.0214433	23	0.095636	0.00420907	0.560078	0.0370172	0.365776	Gjb4(0.28), Dbn1(0.27), Gja1(0.23), Gja1(0.23), Ybx3(0.21), Gja4(0.19), Tjp2(0.14), Gjb5(0.12), Tjp1(0.1), Gjc1(0.06), Gjc1(0.06), Gjb2(0.06), Gjb2(0.06), Specc1l(0.06), Panx1(0.03), Gja5(-0.01), Gja5(-0.01), Des(-0.11), Gjb3(-0.15), Nov(-0.15), Sgsm3(-0.19), Gjb1(-0.27), Gjb1(-0.27),
adult walking behavior	0.102761	0.196708	0.00406906	0.0214871	28	0.333032	0.0768041	0.021299	0.134844	0.176858	Drd1(0.57), Drd1(0.57), Uchl1(0.55), Uchl1(0.55), Cacna1a(0.49), Cacna1a(0.49), Uchl3(0.39), Npc1(0.3), Oxr1(0.28), Chd7(0.26), Arrb2(0.21), Axin1(0.13), Cln8(0.09), Atg7(0.06), Fxn(0.03), Dab1(0.01), Abhd12(0.01), Hipk2(-0.01), Agtpbp1(-0.05), Cacna1c(-0.07), Hexa(-0.08), Htra2(-0.14), Ctns(-0.23), Mapt(-0.3), Cacnb4(-0.5), Epha4(-0.5), Kcnma1(-0.54), Kcnj10(-0.73),
JUN kinase binding	0.0945923	0.293773	0.00409742	0.0216046	13	0.214672	0.109355	0.0201374	0.183514	0.173926	Tgif1(0.49), Daxx(0.18), Mad2l2(0.18), Ptk2(0.14), Lmnb1(0.11), Atn1(0.1), Mapk8ip3(0.1), Gstp1(0.06), Spag9(0.04), Hes1(0.01), Kif5b(0.01), Mapk8ip1(-0.16), Map3k1(-0.18),
actin filament	0.0349703	0.156372	0.00410761	0.0216261	68	0.106212	0.0304076	0.162182	0.000147254	0.965409	Ackr2(0.5), Gas7(0.38), Tfpt(0.35), Rac1(0.3), Actn1(0.3), Inpp5d(0.29), Sh2b2(0.28), Dbn1(0.27), Myo9b(0.26), Rac2(0.23), Ezr(0.23), Src(0.22), Fyn(0.2), Ptges3(0.19), Lmod1(0.19), Wipf2(0.18), Akap13(0.17), Hck(0.16), Cobl(0.15), Pls3(0.15), Capzb(0.14), Dapk3(0.14), Wdr1(0.14), Actr3(0.14), Pawr(0.14), Pawr(0.14), Vcl(0.11), Rhoq(0.11), Keap1(0.09), Cttn(0.08), Flna(0.08), Myo1b(0.07), Coro1b(…
negative regulation of translation	0.0876074	0.145436	0.00416225	0.0218487	67	0.0566567	0.658853	0.0550923	0.0404192	0.0833659	Eif4ebp3(0.65), Btg2(0.48), Cpeb1(0.34), Eif4ebp1(0.32), Enc1(0.31), Paip2(0.24), Paip2(0.24), Fxr2(0.2), Samd4(0.18), Eif4e2(0.17), Grb7(0.15), Patl1(0.15), Dapk3(0.14), Eif4e(0.14), Fxr1(0.14), Ddx3x(0.12), Cnot9(0.12), Calr(0.11), Rpl13a(0.1), Rpl13a(0.1), Eif2ak4(0.1), Cnot3(0.1), Gapdh(0.09), Gapdh(0.09), Rps3(0.09), Cnot2(0.09), Rack1(0.08), Paip2b(0.08), Syncrip(0.06), Malsu1(0.06), Nanos1…
cellular response to UV	0.0843578	0.187332	0.00425243	0.022289	41	0.0130562	0.609848	0.133943	0.0919021	0.0666561	Trp53inp1(0.66), Kdm1a(0.27), Rhbdd1(0.22), Nfatc4(0.21), Ruvbl2(0.16), Cdc25a(0.15), Usp28(0.15), Agap3(0.12), Noc2l(0.11), Eif2ak4(0.1), Eif2s1(0.09), Trp53(0.08), Yy1(0.08), Bak1(0.07), Bak1(0.07), Crebbp(0.07), Pcna(0.07), Triap1(0.06), Ddias(0.06), N4bp1(0.06), N4bp1(0.06), Ep300(0.06), Pold1(0.04), Ino80(0.04), Usp47(0.03), Bax(0.01), Rnf168(0.01), Fmr1(-0.02), Tmem161a(-0.03), Mapk9(-0.05)…
site of double-strand break	0.0802647	0.212043	0.00430728	0.0225431	32	0.0202429	0.462555	0.10502	0.0739013	0.151373	Rad18(0.47), H2afx(0.28), H2afx(0.28), Phf1(0.28), Smc5(0.18), Vcp(0.17), Rnf138(0.14), Slf1(0.13), Oraov1(0.12), Rpa2(0.11), Fam178a(0.11), Trp53(0.08), Smc6(0.08), Aplf(0.03), Smarcad1(0.01), Rnf168(0.01), Rnf169(0.01), Mre11a(0), Prpf19(0), Atf2(-0.02), Nbn(-0.03), Rad50(-0.05), Rad50(-0.05), BC029214(-0.05), Rfwd3(-0.05), Rnf8(-0.15), Smarcal1(-0.2), Parp3(-0.2), Parp3(-0.2), Helb(-0.22), Hus…
regulation of neuronal synaptic plasticity	0.090953	0.280797	0.00431685	0.0225598	15	0.434528	0.0602478	0.104263	0.0148024	0.235178	Vgf(1.21), Cpeb1(0.34), Rac1(0.3), Rac1(0.3), Star(0.28), Ncdn(0.19), Nsmf(0.12), Gsk3b(0.08), Snca(0.05), Kalrn(0), Kalrn(0), Ephb2(-0.07), Dlg4(-0.29), Kcnn2(-0.29), Syp(-0.33),
RNA splicing, via transesterification reactions	0.10463	0.336897	0.00432902	0.0225901	10	0.0386397	0.231217	0.0435926	0.189861	0.217726	Ddx23(0.1), Sf3a2(0.09), Rbm17(0.08), Dbr1(0.08), Srsf10(0.07), Srsf10(0.07), Slu7(0.07), Srrm1(0.03), Scaf11(-0.07), Wdr83(-0.1),
positive regulation of triglyceride catabolic process	0.038088	0.449441	0.00435547	0.0226637	10	0.417574	0.617539	0.0143949	0.0491747	0.0171171	Apoh(0.77), Apoa1(0.51), Fgf21(0.43), Pnpla2(0.34), Pnpla2(0.34), Abhd5(0.14), Abhd5(0.14), Aadac(-0.29), Apoa4(-0.33), Apoa4(-0.33),
protein kinase inhibitor activity	0.0581729	0.166368	0.00435593	0.0226637	47	0.381607	0.00360055	0.00918387	0.763663	0.10806	Nyx(0.63), Socs3(0.59), Camk2n2(0.55), Trib1(0.55), Cdkn1a(0.54), Itprip(0.48), Socs2(0.38), Tsacc(0.33), Socs5(0.25), Rtn4rl2(0.24), Cdkn1c(0.22), Cish(0.2), Chp1(0.2), Prkrip1(0.19), Sh3bp5l(0.19), Trib3(0.18), Cdkn1b(0.13), Socs1(0.13), Socs4(0.13), Socs7(0.13), Npm1(0.09), Socs6(0.09), Dcn(0.07), Sh3bp5(0.06), Sh3bp5(0.06), Nck1(0.02), Camk2n1(-0.05), Pkig(-0.06), Rtn4r(-0.07), Dus2(-0.07), D…
interleukin-1 beta secretion	0.0820415	0.352867	0.00452552	0.023477	10	0.27598	0.212428	0.146667	0.0919479	0.0195153	Tlr6(0.77), Tlr4(0.28), Nlrc4(0.16), Nlrc4(0.16), F2rl1(0.09), Cd36(-0.02), Abca1(-0.11), Aim2(-0.33), Gbp5(-0.38), Gbp5(-0.38),
vasculature development	0.0636341	0.233309	0.00454143	0.023525	24	0.231429	0.0041654	0.13114	0.0618239	0.579043	Zfand5(0.33), Cited2(0.27), Cited2(0.27), Hif1a(0.24), Flt4(0.23), Anp32b(0.23), Fzd5(0.18), Ccm2(0.18), Ccm2(0.18), Spi1(0.13), Ric8a(0.12), Stk11(0.08), Vegfa(0.06), Tmem231(0.06), Wnt7b(0.04), Heg1(-0.01), Ctnnb1(-0.03), B9d1(-0.09), Lrp5(-0.14), Bmp4(-0.15), Tcf21(-0.16), Sox18(-0.17), Ihh(-0.19), Pcnt(-0.2),
proline-rich region binding	0.0993409	0.248556	0.00455884	0.0235807	18	0.0526719	0.193	0.11003	0.0435213	0.342062	Baiap2l1(0.22), Rabac1(0.19), Yap1(0.19), Tcerg1(0.13), Pfn1(0.1), Wbp4(0.1), Garem1(0.09), Csk(0.08), Cttn(0.08), Abl1(0.05), Itsn1(0.04), Apbb1(0.03), Prpf40a(-0.01), Cyld(-0.04), Abi2(-0.05), Nedd4(-0.11), Baiap2(-0.33), Ccnd1(-0.53),
sprouting angiogenesis	0.0625004	0.23402	0.00460327	0.023741	25	0.0467208	0.000945419	0.369355	0.175644	0.58966	Pgf(1.53), Esm1(0.94), Nrarp(0.5), Nrarp(0.5), Thbs1(0.36), Flt4(0.23), Flt1(0.19), Jmjd6(0.17), Otulin(0.14), Cdc42(0.12), Ptk2b(0.1), Sema3e(0.08), Notch1(0.03), Ramp2(0.01), E2f7(-0.06), E2f7(-0.06), Parva(-0.09), Cdh13(-0.13), Rnf213(-0.15), Nrp1(-0.23), Loxl2(-0.23), Rspo3(-0.38), Adgra2(-0.46), Tek(-0.59), Angpt1(-0.66),
aspartic-type endopeptidase activity	0.0699451	0.25237	0.0046419	0.0239055	23	0.0941378	0.119295	0.043608	0.176466	0.247128	Asprv1(0.93), Asprv1(0.93), Nrip3(0.51), Ctsd(0.32), Casp3(0.28), Casp3(0.28), Psen1(0.18), H13(0.15), Sppl3(0.14), Ren1(0.13), Ren1(0.13), Psen2(0.03), Bace2(-0.03), Bace2(-0.03), Sppl2a(-0.05), Napsa(-0.09), Bace1(-0.13), Bace1(-0.13), Casp7(-0.16), Sppl2b(-0.19), Nrip2(-0.32), Ctse(-0.53), Ctse(-0.53),
cellular response to hypoxia	0.0634438	0.15061	0.00465915	0.0239556	59	0.335418	0.167902	0.00792124	0.318352	0.0615632	Adrb2(0.54), Adam8(0.42), Rgcc(0.38), Cpeb1(0.34), Cpeb1(0.34), Eif4ebp1(0.32), Zfp36l1(0.31), Nkx3-1(0.27), Hif1a(0.24), Hif1a(0.24), Gata6(0.23), Sirt1(0.2), Rora(0.15), Hyou1(0.13), Gnb1(0.13), Suv39h1(0.13), Akt1(0.11), Ppard(0.11), Tert(0.1), Bnip3l(0.08), Tigar(0.08), Twist1(0.07), Twist1(0.07), Npepps(0.06), Vegfa(0.06), Higd1a(0.05), Higd1a(0.05), Bnip3(0.04), Bnip3(0.04), Ubqln1(0.04), B…
tRNA (guanine-N2-)-methyltransferase activity	0.0424382	0.180572	0.00466938	0.0239556	75	6.05623e-05	0.619627	0.456876	0.0739902	0.236354	Setd4(0.52), Prdm1(0.43), Mettl6(0.37), Trmt10a(0.28), Prdm4(0.24), Bmt2(0.21), Mettl22(0.15), Mepce(0.14), Mrm1(0.12), Mettl18(0.11), Trmt10c(0.09), Emg1(0.08), Ftsj3(0.08), Smyd2(0.08), Trmt11(0.07), Nsun5(0.07), Mettl25(0.07), Smyd5(0.07), Mettl2(0.06), Trmt10b(0.06), Mettl13(0.06), Fbl(0.05), Trmt2a(0.05), Setd6(0.05), Wbscr22(0.05), Trmt1(0.05), Trmt1(0.05), Mettl23(0.04), Ece2(0.04), Nop2(0…
Ran GTPase binding	0.0629604	0.232403	0.00467196	0.0239556	30	0.0374634	0.828401	0.121529	0.037311	0.0212393	Ranbp17(0.25), Xpo6(0.18), Rangap1(0.17), Ranbp9(0.11), Ranbp10(0.11), Nup50(0.1), Ranbp3(0.1), Tnpo2(0.1), Ranbp1(0.08), Nxt1(0.08), Ipo7(0.08), Ipo11(0.07), Ipo9(0.07), Ipo5(0.05), Kpnb1(0.04), Nup153(0.03), Tnpo1(0.02), Ranbp2(0.01), Nutf2(0), Xpo5(-0.01), Xpo7(-0.05), Xpot(-0.08), Cse1l(-0.08), Ipo4(-0.1), Ipo13(-0.11), Xpo1(-0.12), Ipo8(-0.14), Xpo4(-0.19), Birc5(-0.29), Ranbp3l(-0.95),
threonine-type endopeptidase activity	0.0830184	0.298341	0.0046921	0.0240241	18	0.11609	0.00865521	0.0258766	0.52419	0.363401	Psma5(0.34), Psma1(0.18), Psma7(0.16), Psma6(0.12), Psmb3(0.12), Psma2(0.11), Psmb4(0.11), Psmb7(0.11), Psmb6(0.06), Psmb1(0.05), Psma4(0.02), Psmb5(0.01), Psmb2(0), Psma3(-0.05), Psmb8(-0.15), Psmb10(-0.23), Tasp1(-0.23), Psmb9(-0.75),
positive regulation of vasodilation	0.072577	0.198609	0.00473162	0.0241914	31	0.0812529	0.00412903	0.32024	0.0618201	0.595791	Apln(0.98), Adora2b(0.67), Adrb2(0.54), Nos3(0.53), Egfr(0.23), Gja1(0.23), Sirt1(0.2), Ptk2(0.14), Adm(0.13), Ppard(0.11), F2rl1(0.09), F2rl1(0.09), F2rl1(0.09), Kat2b(0.07), Pla2g6(0.05), Kdr(0.04), Nos2(0.03), Ptprm(0.03), Gja5(-0.01), Adra2a(-0.05), Alox12(-0.05), Ptafr(-0.05), Scpep1(-0.12), Kcnmb1(-0.16), Prkg1(-0.18), Cftr(-0.35), Agt(-0.42), Kcnma1(-0.54), Nos1(-0.56), Nos1(-0.56), Gper1(…
protein autophosphorylation	0.0717262	0.081423	0.00474235	0.0242113	198	0.214951	0.0183096	0.137634	0.00896267	0.704364	Pim1(0.76), Pim1(0.76), Irak3(0.72), Hipk4(0.65), Syk(0.6), Syk(0.6), Fgr(0.54), Txk(0.51), Camk2d(0.42), Camk2d(0.42), Musk(0.36), Prkx(0.36), Pim3(0.36), Pim3(0.36), Fes(0.33), Myo3b(0.3), Clk1(0.29), Mapkapk2(0.29), Map3k3(0.28), Tgfbr1(0.27), Nek2(0.26), Vrk2(0.26), Vrk2(0.26), Tyro3(0.24), Egfr(0.23), Egfr(0.23), Flt4(0.23), Stk17b(0.23), Src(0.22), Peak1(0.22), Mknk2(0.21), Brd4(0.21), Sik2…
nuclear envelope organization	0.107163	0.238685	0.00475605	0.024245	21	0.133284	0.246957	0.0645932	0.0741322	0.149124	Reep4(0.31), Tmem170(0.27), Sun2(0.22), Sun2(0.22), Parp11(0.21), Reep3(0.18), Nup93(0.16), Lemd2(0.14), Lmna(0.12), Sun1(0.06), Sun1(0.06), Ctdnep1(0.03), Cdan1(0.01), Tor1a(0), Zmpste24(0), Zmpste24(0), Nup155(-0.02), Syne2(-0.03), Dmpk(-0.61), Dmpk(-0.61), Sun3(-0.64),
circadian rhythm	0.0959243	0.150292	0.00476266	0.024245	69	0.262054	0.0927859	0.0438162	0.114385	0.17752	Id3(0.53), Atf4(0.45), Nfil3(0.4), Npas2(0.34), Csnk1e(0.33), Per1(0.27), Per1(0.27), Per1(0.27), Ngf(0.25), Nr1d1(0.25), Nr1d1(0.25), Noct(0.24), Cry2(0.24), Dbp(0.24), Arntl(0.23), Arntl(0.23), Arntl(0.23), Id4(0.2), Sirt1(0.2), Srebf1(0.18), Id1(0.15), Atf5(0.15), Cry1(0.14), Cry1(0.14), Cry1(0.14), Dyrk1a(0.11), Bhlhe40(0.11), Setx(0.1), Creb1(0.09), Trp53(0.08), Gsk3b(0.08), Ddx5(0.07), Mett…
bicellular tight junction	0.0856067	0.0978285	0.00477955	0.024296	120	0.228414	0.0189468	0.25385	0.027286	0.348367	Amica1(1.02), Cldn23(0.48), Cldn4(0.46), Cldn4(0.46), Cdh5(0.45), Cldn5(0.45), Cldn5(0.45), Cldn7(0.43), Rap2b(0.42), Clmp(0.38), Jam2(0.33), Marveld2(0.31), Marveld2(0.31), Cldn3(0.3), Cldn3(0.3), Igsf5(0.29), Pmp22(0.28), Esam(0.28), Tgfbr1(0.27), Cxadr(0.26), Cxadr(0.26), Tjap1(0.26), Cyth1(0.23), Magi3(0.19), Wnk3(0.19), Fzd5(0.18), Vasp(0.17), Rap2c(0.16), Synpo(0.15), Epcam(0.14), Epcam(0.1…
anchored component of external side of plasma membrane	0.0827924	0.335078	0.00481855	0.0244591	11	0.0987552	0.0157939	0.454416	0.305543	0.0420882	Cd14(1.38), Tnfrsf23(0.61), Efna5(0.26), Cd24a(0.21), Cd24a(0.21), Folr2(0.19), Cd59b(0.18), Hyal2(-0.11), Folr1(-0.14), Car4(-0.33), Thy1(-0.48),
sulfonate dioxygenase activity	0.0920366	0.199514	0.00490789	0.0246712	30	0.0790232	0.404284	0.0504438	0.0237253	0.309481	Hr(0.3), Jmjd1c(0.27), Jmjd6(0.17), Kdm6b(0.17), Kdm3a(0.14), Phf2(0.12), Kdm7a(0.1), 2410016O06Rik(0.09), Kdm5c(0.08), Kdm6a(0.07), Kdm5b(0.07), Alkbh4(0.06), Alkbh6(0.05), Ogfod2(0.03), Kdm5a(0.03), Kdm4b(0), Kdm3b(0), Alkbh8(-0.01), Mina(-0.02), Kdm4c(-0.02), Ogfod3(-0.03), Ogfod1(-0.03), Alkbh3(-0.06), Kdm4a(-0.08), Alkbh5(-0.09), Fto(-0.11), P4htm(-0.12), Uty(-0.13), Alkbh7(-0.16), Kdm5d(-0.…
2,4-dichlorophenoxyacetate alpha-ketoglutarate dioxygenase activity	0.0920366	0.199514	0.00490789	0.0246712	30	0.0790232	0.404284	0.0504438	0.0237253	0.309481	Hr(0.3), Jmjd1c(0.27), Jmjd6(0.17), Kdm6b(0.17), Kdm3a(0.14), Phf2(0.12), Kdm7a(0.1), 2410016O06Rik(0.09), Kdm5c(0.08), Kdm6a(0.07), Kdm5b(0.07), Alkbh4(0.06), Alkbh6(0.05), Ogfod2(0.03), Kdm5a(0.03), Kdm4b(0), Kdm3b(0), Alkbh8(-0.01), Mina(-0.02), Kdm4c(-0.02), Ogfod3(-0.03), Ogfod1(-0.03), Alkbh3(-0.06), Kdm4a(-0.08), Alkbh5(-0.09), Fto(-0.11), P4htm(-0.12), Uty(-0.13), Alkbh7(-0.16), Kdm5d(-0.…
procollagen-proline dioxygenase activity	0.0920366	0.199514	0.00490789	0.0246712	30	0.0790232	0.404284	0.0504438	0.0237253	0.309481	Hr(0.3), Jmjd1c(0.27), Jmjd6(0.17), Kdm6b(0.17), Kdm3a(0.14), Phf2(0.12), Kdm7a(0.1), 2410016O06Rik(0.09), Kdm5c(0.08), Kdm6a(0.07), Kdm5b(0.07), Alkbh4(0.06), Alkbh6(0.05), Ogfod2(0.03), Kdm5a(0.03), Kdm4b(0), Kdm3b(0), Alkbh8(-0.01), Mina(-0.02), Kdm4c(-0.02), Ogfod3(-0.03), Ogfod1(-0.03), Alkbh3(-0.06), Kdm4a(-0.08), Alkbh5(-0.09), Fto(-0.11), P4htm(-0.12), Uty(-0.13), Alkbh7(-0.16), Kdm5d(-0.…
hypophosphite dioxygenase activity	0.0920366	0.199514	0.00490789	0.0246712	30	0.0790232	0.404284	0.0504438	0.0237253	0.309481	Hr(0.3), Jmjd1c(0.27), Jmjd6(0.17), Kdm6b(0.17), Kdm3a(0.14), Phf2(0.12), Kdm7a(0.1), 2410016O06Rik(0.09), Kdm5c(0.08), Kdm6a(0.07), Kdm5b(0.07), Alkbh4(0.06), Alkbh6(0.05), Ogfod2(0.03), Kdm5a(0.03), Kdm4b(0), Kdm3b(0), Alkbh8(-0.01), Mina(-0.02), Kdm4c(-0.02), Ogfod3(-0.03), Ogfod1(-0.03), Alkbh3(-0.06), Kdm4a(-0.08), Alkbh5(-0.09), Fto(-0.11), P4htm(-0.12), Uty(-0.13), Alkbh7(-0.16), Kdm5d(-0.…
C-19 gibberellin 2-beta-dioxygenase activity	0.0920366	0.199514	0.00490789	0.0246712	30	0.0790232	0.404284	0.0504438	0.0237253	0.309481	Hr(0.3), Jmjd1c(0.27), Jmjd6(0.17), Kdm6b(0.17), Kdm3a(0.14), Phf2(0.12), Kdm7a(0.1), 2410016O06Rik(0.09), Kdm5c(0.08), Kdm6a(0.07), Kdm5b(0.07), Alkbh4(0.06), Alkbh6(0.05), Ogfod2(0.03), Kdm5a(0.03), Kdm4b(0), Kdm3b(0), Alkbh8(-0.01), Mina(-0.02), Kdm4c(-0.02), Ogfod3(-0.03), Ogfod1(-0.03), Alkbh3(-0.06), Kdm4a(-0.08), Alkbh5(-0.09), Fto(-0.11), P4htm(-0.12), Uty(-0.13), Alkbh7(-0.16), Kdm5d(-0.…
C-20 gibberellin 2-beta-dioxygenase activity	0.0920366	0.199514	0.00490789	0.0246712	30	0.0790232	0.404284	0.0504438	0.0237253	0.309481	Hr(0.3), Jmjd1c(0.27), Jmjd6(0.17), Kdm6b(0.17), Kdm3a(0.14), Phf2(0.12), Kdm7a(0.1), 2410016O06Rik(0.09), Kdm5c(0.08), Kdm6a(0.07), Kdm5b(0.07), Alkbh4(0.06), Alkbh6(0.05), Ogfod2(0.03), Kdm5a(0.03), Kdm4b(0), Kdm3b(0), Alkbh8(-0.01), Mina(-0.02), Kdm4c(-0.02), Ogfod3(-0.03), Ogfod1(-0.03), Alkbh3(-0.06), Kdm4a(-0.08), Alkbh5(-0.09), Fto(-0.11), P4htm(-0.12), Uty(-0.13), Alkbh7(-0.16), Kdm5d(-0.…
regulation of MAPK cascade	0.0855151	0.193184	0.00492194	0.0246712	33	0.21708	0.00510668	0.0826222	0.330723	0.275685	Inhbb(1.02), Bmp8b(1), Inhba(0.54), Tlr13(0.54), Bmp8a(0.44), Tgfb1(0.26), Gdf15(0.26), Vrk2(0.26), Cd24a(0.21), Lefty1(0.19), Grb2(0.19), Id1(0.15), Bmp6(0.14), Ren1(0.13), Bmp2(0.11), Pak1(0.1), Rnf41(0.09), Tgfb3(0.07), Stk40(0.06), Tgfb2(0), Phlpp1(-0.04), Bmp7(-0.09), Nf1(-0.09), E130311K13Rik(-0.09), Gdf11(-0.11), Ulk4(-0.12), Psap(-0.17), Syngap1(-0.21), Bmp3(-0.25), Bmp1(-0.26), Ntrk2(-0.…
thyroid hormone receptor binding	0.103588	0.21658	0.00492658	0.0246712	25	0.165746	0.363632	0.0193953	0.088711	0.150069	Hr(0.3), Gas2l1(0.18), Gas2l1(0.18), Prmt2(0.17), Rxrb(0.17), Med4(0.13), Gtf2b(0.12), Taf7(0.11), Taf11(0.08), Fus(0.07), Med13(0.05), Med12(0.04), Med17(0.02), Thrap3(0.01), Med1(-0.01), Med1(-0.01), Nsd1(-0.02), Ncoa2(-0.03), Med16(-0.03), Med30(-0.05), Med24(-0.08), Trip12(-0.11), Ncor1(-0.15), Ncor1(-0.15), Psmc3ip(-0.21),
response to hypoxia	0.0791773	0.106817	0.00492673	0.0246712	114	0.527635	0.0164019	0.234528	0.0204493	0.174273	Pgf(1.53), Alas2(1.21), Edn1(0.76), Sox4(0.67), Hmox1(0.61), Plat(0.57), Ddit4(0.5), Ddit4(0.5), Fosl2(0.46), Camk2d(0.42), Smad3(0.35), Nr4a2(0.32), Acot2(0.31), Ager(0.28), Cited2(0.27), Il18(0.25), Hif1a(0.24), Hif1a(0.24), Hif1a(0.24), Hif1a(0.24), Cd24a(0.21), Flt1(0.19), Ucp3(0.19), Vegfc(0.19), Raf1(0.19), Cryab(0.18), Pld2(0.18), Prmt2(0.17), Wtip(0.17), Wtip(0.17), Camk2g(0.16), Ada(0.13…
tRNA (guanine) methyltransferase activity	0.0445525	0.175933	0.00493007	0.0246712	76	0.000112277	0.64473	0.44056	0.0589672	0.229945	Setd4(0.52), Prdm1(0.43), Mettl6(0.37), Trmt10a(0.28), Prdm4(0.24), Tarbp1(0.22), Bmt2(0.21), Mettl22(0.15), Mepce(0.14), Mrm1(0.12), Mettl18(0.11), Trmt10c(0.09), Emg1(0.08), Ftsj3(0.08), Smyd2(0.08), Trmt11(0.07), Nsun5(0.07), Mettl25(0.07), Smyd5(0.07), Mettl2(0.06), Trmt10b(0.06), Mettl13(0.06), Fbl(0.05), Trmt2a(0.05), Setd6(0.05), Wbscr22(0.05), Mettl23(0.04), Ece2(0.04), Nop2(0.04), Tfb2m(…
histone deubiquitination	0.117517	0.264707	0.004947	0.024721	16	0.0803711	0.192691	0.0856122	0.168469	0.121232	Usp27x(0.22), Atxn7l3(0.19), Usp22(0.1), Usp22(0.1), Atxn7(0.09), Usp21(0.07), Usp16(0.05), Taf10(0.01), Trrap(0), Usp3(-0.01), Usp3(-0.01), Eny2(-0.05), Eny2(-0.05), Usp34(-0.06), Kat2a(-0.08), Supt3(-0.27),
protein-lysine N-methyltransferase activity	0.0444566	0.171503	0.0049911	0.0248712	77	0.000160115	0.670118	0.424999	0.0520937	0.215061	Setd4(0.52), Prdm1(0.43), Mettl6(0.37), Trmt10a(0.28), Prdm4(0.24), Bmt2(0.21), Ezh2(0.18), Mettl22(0.15), Mepce(0.14), Mrm1(0.12), Mettl18(0.11), Trmt10c(0.09), Emg1(0.08), Ftsj3(0.08), Setd7(0.08), Smyd2(0.08), Trmt11(0.07), Nsun5(0.07), Mettl25(0.07), Smyd5(0.07), Mettl2(0.06), Trmt10b(0.06), Mettl13(0.06), Fbl(0.05), Trmt2a(0.05), Setd6(0.05), Setd6(0.05), Wbscr22(0.05), Mettl23(0.04), Ece2(0…
leptin-mediated signaling pathway	0.0892621	0.310682	0.00503468	0.0250182	12	0.6503	0.107241	0.0159596	0.146249	0.0444619	Mt3(0.22), Sirt1(0.2), Prmt2(0.17), Adipor1(0.14), Stat3(0.11), Stat3(0.11), Stat3(0.11), Bbs4(0.01), Mkks(-0.03), Bbs2(-0.06), Lepr(-0.24), Lepr(-0.24),
positive regulation of fibroblast proliferation	0.0923662	0.144332	0.00503475	0.0250182	56	0.0751156	0.055418	0.271977	0.0260889	0.431443	Itgb3(0.82), Serpine1(0.8), Ereg(0.71), Sphk1(0.66), Cdkn1a(0.54), Tgif1(0.49), Fosl2(0.46), Jun(0.46), Jun(0.46), Fntb(0.41), Pdgfa(0.31), Ager(0.28), Tgfb1(0.26), Nras(0.25), Pdgfb(0.25), Egfr(0.23), Lig4(0.22), Fbrs(0.19), Myc(0.18), Rps3a1(0.14), Rnaseh2b(0.14), Xrcc4(0.14), Btc(0.13), Pml(0.13), Mif(0.12), Mif(0.12), Anxa2(0.08), Ctc1(0.07), Zmiz1(0.06), Wapl(0.04), Ndufs4(0.03), Sirt6(0.03)…
cell leading edge	0.106228	0.145951	0.00507662	0.0251909	53	0.0781767	0.134618	0.0779802	0.0386959	0.483696	Cxcr4(0.48), Sra1(0.23), Ywhaz(0.17), Arpc2(0.17), Ssx2ip(0.17), Phldb2(0.15), Pxn(0.14), Actr3(0.14), Ldb1(0.13), Vim(0.12), Cfl1(0.11), Clasp2(0.11), Clasp2(0.11), Atn1(0.1), Myh9(0.1), Iqgap1(0.09), Arf1(0.08), Raph1(0.08), Cd2ap(0.07), Pafah1b1(0.07), Coro1b(0.07), Jmy(0.07), Hdac6(0.06), Prkci(0.06), Shtn1(0.06), Abl1(0.05), Wasl(0.05), Tubg1(0.05), Scrib(0.05), Arhgap1(0.05), Abi1(0.04), Sl…
protein import into nucleus, translocation	0.080131	0.216806	0.00515467	0.0255424	24	0.00966542	0.396862	0.0876061	0.044971	0.466442	Nfkbia(0.48), Tgfb1(0.26), Arntl(0.23), Slc11a1(0.21), Pola2(0.19), Ran(0.15), Rbm22(0.15), Agap3(0.12), Akt1(0.11), Tnpo2(0.1), Trp53(0.08), Bcl3(0.05), Ipo5(0.05), Kpnb1(0.04), Phb2(0.03), Ranbp6(0.03), Tnpo1(0.02), Sec61b(0), Nutf2(0), Cep57(0), Ipo4(-0.1), Akr1c18(-0.1), Tnf(-0.26), Bcl6(-0.33),
endoplasmic reticulum membrane	0.0870123	0.0867809	0.00525757	0.0259861	246	0.254037	0.251628	0.376191	0.0745431	0.00425295	Ttc9(0.81), Dcstamp(0.79), Dcstamp(0.79), Ero1lb(0.64), Moxd1(0.51), Hpd(0.37), Ch25h(0.35), Jph1(0.35), Rtn4(0.35), Lrmp(0.31), Sec22b(0.31), Sdf2l1(0.31), Hspa5(0.3), Pign(0.29), Ier3ip1(0.29), Rab10(0.27), Tmem170(0.27), Vrk2(0.26), Soat2(0.26), Soat2(0.26), Lpin2(0.25), Tyro3(0.24), Rhbdf2(0.24), Fkbpl(0.23), Pigc(0.22), Rhbdd1(0.22), Rce1(0.21), Msmo1(0.21), Dpm2(0.2), Pemt(0.19), Ormdl1(0.1…
positive regulation of peptidyl-serine phosphorylation	0.0808811	0.138776	0.00526627	0.0259861	71	0.147811	0.0305105	0.0838345	0.0252368	0.703805	Il6(1.08), Osm(1), Il11(0.92), Lif(0.73), Ppp1r15a(0.63), Csf3(0.53), Sfrp2(0.38), Cd44(0.33), Cd44(0.33), Spry2(0.3), Tgfb1(0.26), Arrb2(0.21), Hax1(0.2), Raf1(0.19), Mad2l2(0.18), Txn1(0.17), Pfn2(0.16), Pfn2(0.16), Ripk2(0.14), Axin1(0.13), Pdcd10(0.13), Cdc42(0.12), Hcls1(0.12), Mif(0.12), Mif(0.12), Akt1(0.11), Pak1(0.1), Phip(0.1), Gsk3a(0.1), Gsk3b(0.08), Vegfa(0.06), Stk4(0.06), Dock7(0.0…
regulation of cell death	0.0676201	0.335131	0.00533783	0.0263026	12	0.0980842	0.604791	0.0329712	0.022228	0.202243	Junb(0.48), Jund(0.34), Cryab(0.18), Ywhaz(0.17), Slc25a24(0.15), Ing1(0.11), Map3k5(0.11), Ulk1(0.1), Noa1(-0.1), Noa1(-0.1), Noa1(-0.1), Ngfr(-0.83),
positive regulation of protein ubiquitination	0.068183	0.142628	0.00535559	0.0263534	63	0.587131	0.017235	0.0275518	0.326533	0.0743016	Sphk1(0.66), Adrb2(0.54), Birc3(0.44), Rnf180(0.43), Bcl10(0.32), Hspa5(0.3), Ube2d1(0.26), Ngf(0.25), Phf23(0.23), Phf23(0.23), Arrb2(0.21), Fkbp1a(0.19), Ndnl2(0.19), Senp2(0.18), Psmd10(0.15), Ndfip2(0.14), Rnf111(0.14), Rnf111(0.14), Pttg1ip(0.14), Ripk2(0.14), Axin1(0.13), Axin1(0.13), Axin1(0.13), Rassf5(0.13), Peli1(0.11), Npm1(0.09), Chfr(0.09), Ube2l3(0.08), Xiap(0.07), Ndfip1(0.07), Spr…
tRNA (cytosine-5-)-methyltransferase activity	0.0472696	0.17881	0.00536464	0.0263612	76	8.33512e-05	0.639821	0.440674	0.0814922	0.225443	Setd4(0.52), Prdm1(0.43), Mettl6(0.37), Trmt10a(0.28), Prdm4(0.24), Bmt2(0.21), Mettl22(0.15), Mepce(0.14), Mrm1(0.12), Mettl18(0.11), Trmt10c(0.09), Emg1(0.08), Ftsj3(0.08), Smyd2(0.08), Trmt11(0.07), Nsun5(0.07), Mettl25(0.07), Smyd5(0.07), Mettl2(0.06), Trmt10b(0.06), Mettl13(0.06), Fbl(0.05), Trmt2a(0.05), Setd6(0.05), Wbscr22(0.05), Mettl23(0.04), Ece2(0.04), Nop2(0.04), Tfb2m(0.03), Prmt5(0…
laminin binding	0.0616434	0.223111	0.005373	0.0263657	27	0.0574784	0.000780976	0.726591	0.159141	0.28461	Lypd3(0.62), Lypd3(0.62), Thbs1(0.36), Ctss(0.27), Itga3(0.26), Itgb1(0.22), Itgb1(0.22), Tinagl1(0.2), Rpsa(0.15), Lgals3(0.14), Gpc1(0.11), Adam9(0.08), Itga2(0.07), Ncl(0.06), Ecm1(0.05), Itga7(-0.03), Itga7(-0.03), Itga7(-0.03), Nid1(-0.03), Itga9(-0.03), Plekha2(-0.06), Itga6(-0.07), Lgals1(-0.09), Bcam(-0.25), Ssc5d(-0.27), Ache(-0.29), Ache(-0.29),
alternative mRNA splicing, via spliceosome	0.119926	0.273801	0.0053911	0.0264179	17	0.169824	0.11545	0.0858273	0.103668	0.17865	Rbm17(0.08), Srsf6(0.07), Esrp2(0.07), Slu7(0.07), Pqbp1(0.03), Pqbp1(0.03), Sfswap(0.03), Sfpq(0.02), Sfpq(0.02), Hnrnpm(0.02), Srsf1(0.02), Hnrnpa1(0.01), Cdk13(0), Esrp1(-0.02), Mbnl1(-0.08), Mbnl1(-0.08), Rsrc1(-0.13),
lymphocyte homeostasis	0.0928851	0.323872	0.00542585	0.0265514	11	0.203948	0.430955	0.0454543	0.109368	0.0380167	Sos2(0.09), Skil(0.08), Bcl2l11(0.07), Bcl2l11(0.07), Ahr(0.06), Ahr(0.06), Sos1(0.04), Bcl2(-0.06), Bcl2(-0.06), Slc40a1(-0.09), Spns2(-0.34),
integrin binding	0.0273542	0.149203	0.00578321	0.0282221	98	0.111394	2.07827e-05	0.861907	0.0333855	0.661197	Amica1(1.02), Esm1(0.94), Esm1(0.94), Itgb3(0.82), Thbs4(0.74), Syk(0.6), Ctgf(0.55), Sema7a(0.47), Adam8(0.42), Cyr61(0.4), Emp2(0.37), Emp2(0.37), Cd9(0.36), Thbs1(0.36), Gfra1(0.34), Itga5(0.33), Itga5(0.33), Ptpn2(0.3), Actn1(0.3), Actn1(0.3), Mmp14(0.28), Cxadr(0.26), Itga3(0.26), Dab2(0.23), Egfr(0.23), Itgb1(0.22), Itgb1(0.22), Anxa7(0.18), Cd151(0.17), Ptk2(0.14), Pxn(0.14), Calr(0.11), S…
single organismal cell-cell adhesion	0.0570921	0.119794	0.00579896	0.0282599	95	0.127331	0.00211374	0.265482	0.0547419	0.719937	Itgam(0.63), Pvr(0.5), Cd93(0.48), Cd93(0.48), Vmp1(0.48), Cdh5(0.45), Cdh5(0.45), Cldn5(0.45), Adgrv1(0.44), Adam8(0.42), Sox9(0.41), Cyr61(0.4), Ttyh1(0.33), Lims2(0.33), Igsf5(0.29), Esam(0.28), Cdh1(0.26), Cdh1(0.26), Cxadr(0.26), Selp(0.25), Egfr(0.23), Nectin4(0.22), Pdpn(0.2), Psen1(0.18), Pkp3(0.17), Itgb2(0.16), Itgb2(0.16), Rpsa(0.15), Shc1(0.14), Srf(0.14), Pkp2(0.14), Lims1(0.13), Cdc…
positive regulation of transcription from RNA polymerase I promoter	0.104247	0.327086	0.00588744	0.0286517	11	0.109867	0.148728	0.0253016	0.137924	0.375018	Ppp1r15a(0.63), Atf4(0.45), Rasl11a(0.21), Phf8(0.15), Heatr1(0.08), Dhx33(0.07), Dhx33(0.07), Erbb2(0.03), Eif2ak3(-0.04), Eif2ak3(-0.04), Ubtf(-0.11),
negative regulation of tumor necrosis factor production	0.0589889	0.196257	0.00592466	0.0287932	38	0.39177	0.00101036	0.376711	0.0583713	0.350975	Ptpn22(0.83), Ptpn22(0.83), Irak3(0.72), Irak3(0.72), Tlr4(0.28), Arrb2(0.21), Zc3h12a(0.21), Zc3h12a(0.21), Sirt1(0.2), Nfkbil1(0.18), Cactin(0.18), Nlrc3(0.17), Nlrc3(0.17), C5ar2(0.16), Tnfaip3(0.15), Hsf1(0.14), Trim27(0.12), Twist1(0.07), Gstp1(0.06), Havcr2(0.06), Tspo(0.04), Flt3(0.04), Hdac3(0.03), Akap8(0.03), Vimp(0), Ptger4(-0.04), Rara(-0.06), Trim30a(-0.06), Acp5(-0.09), Nr1h4(-0.13)…
B cell proliferation	0.102626	0.332301	0.00595287	0.0288906	10	0.0918221	0.0788282	0.0178749	0.397832	0.300764	Il7r(0.56), Il7r(0.56), Hspd1(0.28), Ptprc(0.24), Ctps(0.15), Shb(0.07), Abl1(0.05), Prkcd(0.02), Bcl2(-0.06), Mef2c(-0.29),
cytoplasmic exosome (RNase complex)	0.0906654	0.312352	0.00597407	0.0289538	14	0.00594237	0.504526	0.278978	0.0409699	0.214438	Carhsp1(0.53), Gtpbp1(0.2), Exosc8(0.14), Exosc4(0.04), Exosc3(0), Exosc3(0), Dis3(-0.02), Dis3l(-0.02), Dis3l(-0.02), Exosc7(-0.03), Dis3l2(-0.03), Exosc2(-0.03), Exosc9(-0.04), Exosc5(-0.12),
cell surface receptor signaling pathway	0.043908	0.118693	0.00600715	0.0290743	129	0.752471	5.7802e-05	0.360055	0.066359	0.280409	Cxcr2(1.44), Celsr3(1.19), Cd101(0.83), Edn1(0.76), Syk(0.6), Syk(0.6), Clec1b(0.52), Cd274(0.52), Adgrg2(0.48), Fcgr3(0.47), Fcer1g(0.45), Fcer1g(0.45), Plxna2(0.44), Adgrv1(0.44), Cd53(0.36), Cd9(0.36), Tirap(0.3), Tirap(0.3), Cblb(0.29), Gpr157(0.29), Fzd2(0.27), Egfr(0.23), Cd24a(0.21), Fzd3(0.21), Fyn(0.2), Anxa1(0.2), Osmr(0.2), Pik3cd(0.2), Hax1(0.2), Mapkapk3(0.19), Fzd5(0.18), Fzd6(0.18)…
protein K48-linked deubiquitination	0.0928388	0.25067	0.00602794	0.0291351	20	0.0357398	0.544286	0.0443918	0.112214	0.157258	Yod1(0.22), Atxn3(0.17), Tnfaip3(0.15), Tnfaip3(0.15), Otud7b(0.14), Otud7b(0.14), Otud4(0.05), Otub1(0.05), Usp5(0.03), Vcpip1(0.03), Usp25(0), Otub2(0), Otub2(0), Usp19(0), Usp37(-0.02), Bap1(-0.03), Usp34(-0.06), Usp33(-0.08), Usp8(-0.09), Usp20(-0.29),
endoderm development	0.110176	0.195539	0.00620833	0.0299052	28	0.107257	0.0922526	0.0506952	0.100342	0.458457	Nog(0.78), Arc(0.61), Angpt2(0.46), Smad3(0.35), Tgfb1(0.26), Dab2(0.23), Pelo(0.15), Pelo(0.15), Smad4(0.13), Bmpr1a(0.11), Hhex(0.1), Smad2(0.07), Hdac1(0.07), Hdac1(0.07), Nckap1(0.06), Bptf(0.06), Med12(0.04), Notch1(0.03), Sox17(0.02), Ext1(-0.02), Hnf1b(-0.05), Ankrd17(-0.05), Tnrc6c(-0.07), Kif16b(-0.14), Bmp4(-0.15), Angpt4(-0.23), Epb41l5(-0.26), Angpt1(-0.66),
membrane coat	0.124332	0.20393	0.00621389	0.0299052	27	0.0749539	0.203193	0.235506	0.0824957	0.113103	Ap3b2(0.56), Ap1s2(0.41), Ap3s1(0.26), Chmp2a(0.21), Chmp4b(0.18), Ap4e1(0.12), Ap2b1(0.09), Ap1s1(0.04), Ap2a1(0.03), Copb2(0.03), Ap2s1(0), Synj1(-0.01), Cltc(-0.02), Copb1(-0.02), Ap3d1(-0.03), Ap1g1(-0.04), Ap3s2(-0.04), Copa(-0.04), Copz1(-0.04), Copg1(-0.07), Ap1g2(-0.09), Ap2a2(-0.1), Ap3b1(-0.13), Ap1s3(-0.18), Ap1b1(-0.19), Copg2(-0.19), Dnm1(-0.33),
regulation of mRNA processing	0.0971917	0.338332	0.00622108	0.0299052	12	0.0182172	0.549631	0.0483344	0.126233	0.207308	Cdk11b(0.11), Sltm(0.1), Safb(0.09), Safb(0.09), Iws1(0.07), Iws1(0.07), Safb2(0.07), Supt6(0.03), Srpk1(-0.04), Srpk1(-0.04), Ptcd2(-0.08), Nova1(-0.22),
negative regulation of interleukin-6 production	0.0497141	0.239056	0.00624042	0.0299574	27	0.419819	0.000590556	0.155741	0.0156309	0.847399	Irak3(0.72), Irak3(0.72), Klf2(0.38), Tlr4(0.28), Socs5(0.25), Arrb2(0.21), Zc3h12a(0.21), Zc3h12a(0.21), Nlrc3(0.17), Nlrc3(0.17), Hgf(0.16), Tnfaip3(0.15), Tnfrsf1a(0.13), Csk(0.08), Gba(0.06), Nckap1l(0.06), Havcr2(0.06), Flt3(0.04), Vimp(0), Trim30a(-0.06), Nlrx1(-0.1), Nr1h4(-0.13), Tnf(-0.26), Arrb1(-0.32), Tlr9(-0.41), Gas6(-0.53), Aqp4(-0.89),
STAGA complex	0.0891779	0.290568	0.00631507	0.0302101	16	0.0424732	0.526284	0.22937	0.00992152	0.197704	Taf5l(0.28), Taf9(0.14), Tada3(0.12), Tada3(0.12), Sap130(0.1), Sap130(0.1), Atxn7(0.09), Tada1(0.04), Taf10(0.01), Trrap(0), Taf12(-0.03), Supt7l(-0.06), Kat2a(-0.08), Kat2a(-0.08), Tada2b(-0.16), Supt3(-0.27),
cAMP-dependent protein kinase regulator activity	0.0566457	0.38061	0.0063422	0.0302149	11	0.592927	0.078753	0.0637512	0.145439	0.0347798	Prkar1a(0.17), Prkar1a(0.17), Prkar1a(0.17), Prkar1a(0.17), Prkar2a(0.15), Prkar1b(0.04), Prkar1b(0.04), Nos2(0.03), Prkag2(-0.11), Prkar2b(-1.08), Prkar2b(-1.08),
protein methyltransferase activity	0.0503498	0.168965	0.00634529	0.0302149	81	0.000104426	0.635322	0.435035	0.101317	0.219672	Setd4(0.52), Prdm1(0.43), Mettl6(0.37), Trmt112(0.34), Trmt10a(0.28), Prdm4(0.24), Bmt2(0.21), Mettl22(0.15), Mepce(0.14), Suv39h1(0.13), Mrm1(0.12), Mettl18(0.11), Trmt10c(0.09), Emg1(0.08), Ftsj3(0.08), Ntmt1(0.08), Ntmt1(0.08), Smyd2(0.08), Trmt11(0.07), Nsun5(0.07), Mettl25(0.07), Smyd5(0.07), Mettl2(0.06), Trmt10b(0.06), Mettl13(0.06), Fbl(0.05), Trmt2a(0.05), Setd6(0.05), Wbscr22(0.05), Met…
positive regulation of T cell migration	0.063885	0.342609	0.00635409	0.0302161	16	0.438272	0.0359214	0.306286	0.0078061	0.244404	Ccl20(0.91), Itgb3(0.82), Adam8(0.42), Selk(0.15), Tmem102(0.11), Tmem102(0.11), Tmem102(0.11), Ccl21a(0.03), Ccl5(0.03), Cxcl10(-0.05), Itga4(-0.07), Pycard(-0.08), Lgals9(-0.4), Tnfrsf14(-0.52), Aif1(-0.66), Cxcl12(-0.81),
blastocyst formation	0.12372	0.296717	0.00636442	0.0302246	12	0.0915727	0.157502	0.0836312	0.140715	0.218709	Tead4(0.36), Rrp7a(0.13), Sf3b6(0.11), Tjp1(0.1), Skil(0.08), Wdr74(0.07), Sf3b1(0.06), Bysl(0.05), Rpl7l1(0.04), Kdm4c(-0.02), Prickle2(-0.1), Mfn2(-0.15),
antibacterial humoral response	0.0817802	0.314936	0.00642929	0.0304503	13	0.504402	0.0106864	0.157686	0.0674849	0.21962	Slpi(0.8), Slpi(0.8), Jchain(0.38), Hist1h2bc(0.19), Rpl39(0.17), Adm(0.13), H2-T23(0.12), Pla2g6(0.05), B2m(0.04), Hist2h2be(-0.1), Hist1h2be(-0.17), Ang(-0.56), Ang(-0.56),
transcription factor activity, RNA polymerase II distal enhancer sequence-specific binding	0.0601168	0.176644	0.00643589	0.0304503	45	0.51414	0.00211318	0.140924	0.321884	0.115488	Cebpb(0.52), Jun(0.46), Sox9(0.41), Sox9(0.41), Sox7(0.38), Rela(0.36), Rela(0.36), Hif1a(0.24), Gata6(0.23), Tfap4(0.23), Atf1(0.19), Foxc1(0.19), Tle4(0.19), Nfatc1(0.14), Srf(0.14), Spi1(0.13), Bhlhe40(0.11), Arnt(0.1), Mef2a(0.1), Creb1(0.09), Usf1(0.08), Pknox1(0.07), Ahr(0.06), Foxc2(0.06), Foxp1(0.06), Foxp1(0.06), Foxf1(0.03), Sox17(0.02), Usf2(0), Hnf1b(-0.05), Hnf1b(-0.05), Meis1(-0.07)…
regulation of cell shape	0.0656361	0.112315	0.00643778	0.0304503	135	0.135798	0.0147844	0.105197	0.0108264	0.896627	Il6(1.08), Cdc42ep3(0.56), Fgr(0.54), Rhou(0.45), Rhou(0.45), Gas7(0.38), Arhgap15(0.36), Fes(0.33), Csnk1e(0.33), Rhoj(0.31), Gm14137(0.3), Arap3(0.28), Vrk2(0.26), Msn(0.25), Ezr(0.23), Ttbk2(0.23), Cdc42ep5(0.22), Cdc42ep5(0.22), Fermt2(0.21), Fyn(0.2), Pdpn(0.2), Anxa1(0.2), Csnk1d(0.2), Myl12a(0.19), Anxa7(0.18), Wipf2(0.18), Cdc42ep2(0.18), Cdc42ep2(0.18), Cdc42se2(0.17), Gna13(0.16), Hck(0…
negative regulation of anoikis	0.0903687	0.264557	0.00651742	0.0307449	15	0.192586	0.00560016	0.169686	0.0781542	0.58942	Pdk4(0.64), Itga5(0.33), Tle1(0.25), Itgb1(0.22), Src(0.22), Mcl1(0.17), Ptk2(0.14), Ptrh2(0.07), Notch1(0.03), Pik3ca(0.01), Bcl2(-0.06), Cav1(-0.12), Cav1(-0.12), Ntrk2(-0.27), Snai2(-0.48),
endoplasmic reticulum tubular network organization	0.124859	0.318294	0.00658947	0.0309736	10	0.080836	0.15681	0.224747	0.212456	0.0568622	Rtn4(0.35), Rab10(0.27), Tmem170(0.27), Lnpk1(0.09), Use1(0.07), Reep2(0.04), Rab18(0.02), Rtn3(-0.02), Tmem33(-0.12), Reep1(-0.19),
pre-miRNA processing	0.102889	0.294741	0.00659803	0.0309736	13	0.125383	0.397134	0.201821	0.0162947	0.122934	Ago4(0.37), Tarbp2(0.18), Ago2(0.11), Ago2(0.11), Dicer1(0.05), Dicer1(0.05), Adar(0.03), Zcchc11(0.02), Mrpl44(0.01), Prkra(-0.03), Drosha(-0.06), Ago3(-0.1), Ago1(-0.14),
phosphoprotein binding	0.120941	0.149375	0.00659989	0.0309736	46	0.22368	0.237972	0.167347	0.0944348	0.0366928	Plat(0.57), Crmp1(0.47), Cd44(0.33), Pde3b(0.28), Sfn(0.26), Src(0.22), Aptx(0.22), Mid1(0.2), Grb2(0.19), Rraga(0.17), Shc1(0.14), Ywhae(0.1), Csnk1g2(0.1), Plcg1(0.09), Pafah1b1(0.07), Ywhab(0.07), Tbk1(0.07), Csnk1g3(0.07), Prkcsh(0.06), Pih1d1(0.06), Pkd2(0.05), Snca(0.05), Mid2(0.04), Csnk1a1(0.04), Cacnb2(0.03), Cbx4(0.03), Fkbp4(0.02), Lyn(0.02), Bag1(0.01), Csnk1g1(0.01), Thrap3(0.01), Ca…
regulation of proteasomal protein catabolic process	0.117284	0.269278	0.00660092	0.0309736	15	0.0974877	0.216378	0.192738	0.0858318	0.110027	Ubb(0.27), Psme2(0.14), Usp14(0.14), Psmd14(0.14), Psme1(0.01), Uchl5(0.01), Pkd1(0), Pkd1(0), Psme3(0), Psme3(0), Tmf1(0), Btrc(-0.02), Rhbdf1(-0.02), Prkaca(-0.07), Gpx1(-0.11),
neuron apoptotic process	0.096335	0.157265	0.00669364	0.031367	44	0.416599	0.0348169	0.24059	0.0747147	0.0869754	Apaf1(0.34), Bcl2l1(0.28), Bcl2l1(0.28), Casp3(0.28), Casp3(0.28), Casp3(0.28), Oxr1(0.28), Ngf(0.25), Erbb3(0.22), Lig4(0.22), Nae1(0.2), Psen1(0.18), Siah1a(0.17), Usp53(0.17), Atn1(0.1), Gapdh(0.09), Trp53(0.08), Trp53(0.08), Xiap(0.07), Polb(0.07), Zfp110(0.07), Bnip3(0.04), Diablo(0.02), Bax(0.01), Bax(0.01), App(0), App(0), Bcl2(-0.06), Bcl2(-0.06), Htt(-0.06), Tnfrsf21(-0.06), Fam162a(-0.0…
RNA polymerase II core promoter sequence-specific DNA binding	0.0946378	0.136853	0.00676549	0.0316618	61	0.319319	0.0112835	0.143652	0.113357	0.30899	Fos(0.81), Cebpb(0.52), Egr1(0.48), Smad1(0.42), Nfil3(0.4), Pax8(0.4), Nr4a2(0.32), Gata6(0.23), Hsf2(0.23), Cdk9(0.22), H3f3b(0.21), Yap1(0.19), Ikzf1(0.19), Ezh2(0.18), Myc(0.18), Tfap2a(0.18), Tfap2a(0.18), Ruvbl2(0.16), Hsf1(0.14), Mtf1(0.14), Nfatc1(0.14), Spi1(0.13), Maz(0.11), Stat6(0.09), Tal1(0.09), Kdm2b(0.09), Sp1(0.08), Trp53(0.08), H3f3a(0.07), Smad5(0.06), Ep300(0.06), Hdac2(0.05),…
stress granule assembly	0.112597	0.296138	0.00686501	0.0320224	13	0.242633	0.314956	0.0502226	0.0533517	0.141269	Grb7(0.15), Ddx3x(0.12), Atxn2l(0.1), Atxn2l(0.1), Atxn2(0.06), Atxn2(0.06), Pum2(0.05), Pum2(0.05), Cirbp(0.04), Pqbp1(0.03), Ogfod1(-0.03), Dync1h1(-0.04), Bicd1(-0.18),
telomerase RNA binding	0.0816162	0.267653	0.00686939	0.0320224	18	0.0591095	0.202312	0.167235	0.0168724	0.489717	Smg5(0.16), Snrpb(0.13), Nop10(0.13), Nop10(0.13), Pinx1(0.13), Nhp2(0.12), Hnrnpc(0.11), Tert(0.1), Tert(0.1), Wrap53(0.09), Dkc1(0.08), Hnrnpu(0.05), Smg7(-0.05), Snrpd3(-0.06), Naf1(-0.06), Smg6(-0.11), Smg6(-0.11), Tep1(-0.21),
carbohydrate binding	0.0812339	0.109054	0.00686971	0.0320224	125	0.383865	0.00176297	0.115176	0.108247	0.555176	Chil3(1.73), Cd33(1.18), Sell(1.11), Clec4d(1.03), Clec4e(1.01), Klrb1b(0.96), Clec10a(0.86), Eva1c(0.74), Klra2(0.71), Mgl2(0.57), Clec1b(0.52), Cd93(0.48), Siglece(0.44), Galnt16(0.44), Uap1(0.43), Taldo1(0.32), H6pd(0.32), Sele(0.3), Nptx2(0.3), Gfpt2(0.28), Fcer2a(0.26), Olr1(0.26), Selp(0.25), Pkd1l3(0.22), Cd24a(0.21), Prps1(0.21), Galnt3(0.19), Galnt6(0.18), Stbd1(0.17), Adgrl2(0.15), Layn…
regulation of inflammatory response	0.107293	0.145307	0.00687986	0.0320276	52	0.0447953	0.0195369	0.284348	0.157671	0.431136	S100a9(1.61), S100a8(1.6), Sema7a(0.47), Rela(0.36), Rela(0.36), Mas1(0.32), Mas1(0.32), Ager(0.28), Tlr4(0.28), Sbno2(0.22), Sbno2(0.22), Casp4(0.2), Anxa1(0.2), Il1r1(0.18), Myd88(0.18), Jak2(0.16), Tnip1(0.14), Il1rl2(0.13), Nlrp3(0.11), Mta1(0.1), Birc2(0.08), Clcf1(0.07), Tbc1d23(0.06), Setd6(0.05), Setd6(0.05), Dicer1(0.05), Fabp4(0.03), Rictor(0.03), Nr1d2(0.03), Lyn(0.02), Park7(0.01), Ca…
negative regulation of NF-kappaB transcription factor activity	0.0784606	0.132342	0.00689766	0.0320682	68	0.0519717	0.00364303	0.30967	0.119199	0.683982	Nlrp12(1.58), Acod1(1.34), Irak3(0.72), Nfkbia(0.48), Dap(0.26), Traf3(0.25), Traf3(0.25), Traf3(0.25), Klf4(0.24), Arrb2(0.21), Zc3h12a(0.21), Zc3h12a(0.21), Chp1(0.2), Sirt1(0.2), Nfkbil1(0.18), Cactin(0.18), Prmt2(0.17), Nlrc3(0.17), Nlrc3(0.17), Tnfaip3(0.15), Psmd10(0.15), Otulin(0.14), Brms1(0.13), Peli1(0.11), Irak2(0.11), Nlrp3(0.11), Pias4(0.1), Commd7(0.1), Usp7(0.1), Irak1(0.07), Ufl1(…
transcriptional activator activity, RNA polymerase II transcription regulatory region sequence-specific binding	0.0889639	0.12751	0.0069417	0.0322306	72	0.571427	0.197782	0.0080538	0.12767	0.0989052	Maff(0.75), Csrnp1(0.65), Mafk(0.44), Sox9(0.41), Creb3l4(0.36), Creb3l4(0.36), Nr4a2(0.32), Nr4a2(0.32), Runx1(0.28), Ebf4(0.27), Ebf4(0.27), Hif1a(0.24), Gata6(0.23), Hsf2(0.23), Plagl1(0.2), Atf1(0.19), Tfap2a(0.18), Irf2(0.17), Rxrb(0.17), Mafg(0.14), Srf(0.14), Smad4(0.13), Rest(0.13), Gabpa(0.12), Gabpa(0.12), Stat3(0.11), Myocd(0.11), Myocd(0.11), E2f4(0.1), Ovol2(0.1), Arid3a(0.09), Arid3…
ventricular septum morphogenesis	0.0538091	0.214462	0.00695663	0.0322576	29	0.680284	0.000347942	0.193175	0.143944	0.258533	Wnt11(0.8), Sox4(0.67), Sav1(0.48), Cited2(0.27), Tgfbr1(0.27), Fzd2(0.27), Rbm15(0.22), Pitx2(0.17), Fgfrl1(0.17), Nfatc1(0.14), Smad4(0.13), Zfpm2(0.09), Hey1(0.04), Notch1(0.03), Smad7(0.02), Hes1(0.01), Tgfbr2(0.01), Zfpm1(0.01), Acvr1(0), Hey2(0), Tgfb2(0), Tgfb2(0), Gja5(-0.01), Egln1(-0.05), Fzd1(-0.07), Tbx3(-0.08), Heyl(-0.17), Prox1(-0.27), Sox11(-0.37),
protein K11-linked deubiquitination	0.096369	0.312674	0.00701986	0.0325082	11	0.0837697	0.316009	0.11772	0.109816	0.111361	Yod1(0.22), Tnfaip3(0.15), Tnfaip3(0.15), Otud7b(0.14), Otud7b(0.14), Otud3(0.13), Vcpip1(0.03), Otub2(0), Otub2(0), Usp37(-0.02), Usp30(-0.06),
positive regulation of interleukin-12 production	0.0860632	0.290391	0.00706507	0.0326244	17	0.24197	0.0121705	0.420079	0.153652	0.094608	Ccr7(2.19), Tirap(0.3), Ager(0.28), Hspd1(0.28), Tlr4(0.28), Tnfsf9(0.23), Tlr3(0.07), H2-M3(0.06), Flt3(0.04), Tlr2(-0.01), Cd36(-0.02), Irf8(-0.09), Nod2(-0.14), Nod2(-0.14), Cd40(-0.31), Tlr9(-0.41), Plcb1(-0.52),
JUN kinase kinase activity	0.107497	0.305792	0.00707407	0.0326244	11	0.312989	0.025922	0.162774	0.0345036	0.400199	Grk2(0.26), Map2k7(0.2), Coq8b(0.2), Grk6(0.18), Alpk1(0.18), Map2k4(0.17), Grk3(0.1), Grk5(0.09), Adck5(-0.1), Adck2(-0.11), Adck1(-0.17),
beta-catenin destruction complex	0.109401	0.25124	0.00708183	0.0326244	18	0.115301	0.112604	0.119883	0.122751	0.230639	Rgs19(0.18), Siah1a(0.17), Axin1(0.13), Axin1(0.13), Axin1(0.13), Gsk3b(0.08), Gsk3b(0.08), Cacybp(0.07), Csnk1a1(0.04), Apc(0.01), Apc(0.01), Ctnnb1(-0.03), Ctnnb1(-0.03), Ctnnbip1(-0.04), Ctnnbip1(-0.04), Dact1(-0.06), Apc2(-0.59), Axin2(-0.75),
platelet-derived growth factor receptor signaling pathway	0.118097	0.15739	0.00711017	0.0327123	41	0.0762505	0.0552266	0.0738381	0.226005	0.399252	Itgb3(0.82), Csrnp1(0.65), Plat(0.57), Plat(0.57), Txnip(0.37), Zfand5(0.33), Tiparp(0.33), Pdgfa(0.31), Pdgfa(0.31), Pdgfb(0.25), Pdgfb(0.25), Schip1(0.24), Abl2(0.22), Src(0.22), Arid5b(0.19), Jak2(0.16), Ptprj(0.1), Ptpn11(0.09), Iqgap1(0.09), Sgpl1(0.08), Rapgef1(0.07), Bcr(0.07), Abl1(0.05), Abl1(0.05), Myo1e(0.03), Bcar1(0), Pdap1(0), Fer(-0.03), Pten(-0.1), Pdgfc(-0.17), Pdgfc(-0.17), Pdgf…
positive regulation of MAP kinase activity	0.0923048	0.148723	0.00715922	0.0328857	48	0.105904	0.00382349	0.225838	0.376083	0.311277	Edn1(0.76), Pik3r5(0.45), Pdgfa(0.31), Pdgfa(0.31), Tgfb1(0.26), Pdgfb(0.25), Pdgfb(0.25), Egfr(0.23), Kras(0.23), Src(0.22), Cd24a(0.21), Flt1(0.19), Ezh2(0.18), Psen1(0.18), Kitl(0.15), Pdcd10(0.13), Kit(0.12), Mif(0.12), Hras(0.1), Pik3cg(0.1), Iqgap1(0.09), Csk(0.08), Irak1(0.07), Vegfa(0.06), Pde5a(0.05), Erbb2(0.03), Ajuba(0.03), Prkcd(0.02), Edn3(0.01), Fgf2(-0.03), Fgfr1(-0.03), Maged1(-0…
positive regulation of neuron projection development	0.0856937	0.0982283	0.00716644	0.0328857	115	0.138448	0.011538	0.0317128	0.226317	0.688291	Cxcl5(1.43), Il6(1.08), Hspb1(0.9), Lif(0.73), Sphk1(0.66), Gprc5b(0.44), Acsl6(0.41), Adamts1(0.34), Cpeb1(0.34), Fes(0.33), Enc1(0.31), Kif3c(0.31), Hspa5(0.3), Cflar(0.27), Dbn1(0.27), Kdm1a(0.27), Itga3(0.26), P2ry2(0.26), Ngf(0.25), Ngf(0.25), Twf2(0.25), Ankrd1(0.24), Abl2(0.22), Abl2(0.22), Itgb1(0.22), Cd24a(0.21), Cd24a(0.21), Fyn(0.2), Sirt1(0.2), Atf1(0.19), Ahi1(0.19), Katnb1(0.19), F…
Rac GTPase binding	0.104488	0.191011	0.00731611	0.0334861	41	0.139344	0.0778891	0.228653	0.0104547	0.53846	Dock4(0.59), Ncf2(0.44), Hace1(0.17), Sod1(0.14), Ralbp1(0.12), Map3k11(0.12), Srgap1(0.12), Iqgap1(0.09), Cyfip1(0.08), Coro1c(0.08), Rcc2(0.08), Rcc2(0.08), Flna(0.08), Dvl2(0.07), Mtss1l(0.07), Nckap1(0.06), Dock7(0.06), Dock7(0.06), Dvl1(0.05), Brk1(0.05), Farp1(0.04), Srgap2(0.03), Srgap2(0.03), Rab7(0.03), Arhgef2(0.01), Als2(0.01), Dvl3(0), Iqgap2(-0.03), Ocrl(-0.05), Abi2(-0.05), Arhgap4(…
protein sumoylation	0.117419	0.205402	0.00731622	0.0334861	28	0.308292	0.108448	0.107859	0.165454	0.0651117	Pias3(0.2), Ube2i(0.18), Ube2i(0.18), Nfatc2ip(0.11), Sumo3(0.11), Sumo3(0.11), Pias4(0.1), Pias4(0.1), Trim28(0.09), Uba2(0.09), Uba2(0.09), Zfp451(0.08), Topors(0.08), Cbx4(0.03), Ranbp2(0.01), Trpm4(-0.02), Sae1(-0.04), Sae1(-0.04), Pias1(-0.09), Pias1(-0.09), Sumo1(-0.11), Sumo1(-0.11), Sumo1(-0.11), Pias2(-0.12), Pias2(-0.12), Ifih1(-0.16), Sumo2(-0.25), Sumo2(-0.25),
protein phosphatase binding	0.0852095	0.120332	0.00742874	0.0339572	82	0.375569	0.375562	0.0805542	0.00271553	0.264101	Hsp90aa1(0.65), Ppp1r15a(0.63), Drd1(0.57), Cdh5(0.45), Pstpip1(0.33), Ceacam2(0.33), Irs2(0.33), Mvp(0.3), Cdh1(0.26), Nek2(0.26), Traf3(0.25), Egfr(0.23), Flt4(0.23), Nptxr(0.22), Fbxl2(0.21), Map2k7(0.2), Grb2(0.19), Vcp(0.17), Ppp1cc(0.14), Cdkn1b(0.13), Ppp2ca(0.12), Rpa2(0.11), Stat3(0.11), Map3k5(0.11), Anapc7(0.11), Ywhae(0.1), Ctnnd1(0.09), Stat6(0.09), Iqgap1(0.09), Vrk3(0.09), Vrk3(0.0…
erythrocyte differentiation	0.106657	0.162089	0.00745566	0.0340129	46	0.469873	0.05031	0.0197754	0.218742	0.18634	Alas2(1.21), Ptpn2(0.3), Casp3(0.28), Casp3(0.28), Ikzf1(0.19), Mfsd7b(0.17), Mfsd7b(0.17), Jak2(0.16), Slc25a38(0.15), Spi1(0.13), Hcls1(0.12), Kit(0.12), Rps14(0.12), Tal1(0.09), Tal1(0.09), Tal1(0.09), Nfe2l1(0.08), Dyrk3(0.08), Dyrk3(0.08), Pknox1(0.07), Smad5(0.06), Rps19(0.06), Fech(0.04), Adar(0.03), Tmem14c(0.03), Lyn(0.02), Atpif1(0.01), Atpif1(0.01), Zfpm1(0.01), Zfpm1(0.01), Epas1(0), …
transmembrane receptor protein tyrosine kinase signaling pathway	0.0678081	0.158689	0.00746778	0.0340129	82	0.26581	0.00187153	0.562499	0.0180845	0.507915	Gdnf(0.72), Ntf5(0.63), Syk(0.6), Fgr(0.54), Txk(0.51), Angpt2(0.46), Epha2(0.43), Pilra(0.43), Shc4(0.42), Gfra1(0.34), Dok1(0.31), Matk(0.26), Itk(0.25), Tec(0.24), Egfr(0.23), Flt4(0.23), Erbb3(0.22), Fyn(0.2), Flt1(0.19), Ahi1(0.19), Btk(0.17), Tnk2(0.17), Bmx(0.16), Hck(0.16), Dok4(0.15), Kit(0.12), Lcp2(0.11), Csk(0.08), Frk(0.08), Tnk1(0.08), Jak1(0.06), Tyk2(0.06), Flt3(0.04), Kdr(0.04), …
necroptotic process	0.10082	0.24852	0.00748809	0.0340129	18	0.029259	0.341651	0.022088	0.301227	0.271858	Birc3(0.44), Mlkl(0.23), Mlkl(0.23), Ripk3(0.14), Ripk3(0.14), Ripk3(0.14), Ripk1(0.09), Ripk1(0.09), Birc2(0.08), Trp53(0.08), Dnm1l(0.02), Dnm1l(0.02), Ppif(-0.03), Cyld(-0.04), Pgam5(-0.06), Pgam5(-0.06), Pygl(-0.06), Trpm7(-0.25),
endoplasmic reticulum chaperone complex	0.0331691	0.391718	0.00748838	0.0340129	12	0.0352693	0.707273	0.746515	0.0198778	0.00268047	Sdf2l1(0.31), Hspa5(0.3), Hspa5(0.3), Pdia6(0.18), Hyou1(0.13), Hsp90b1(0.05), Dnajc10(0.03), P4hb(0.02), Ppib(-0.01), Pdia4(-0.03), Dnajb11(-0.05), Ugt1a1(-0.77),
U5 snRNP	0.100274	0.257082	0.007489	0.0340129	20	0.0158936	0.32424	0.561819	0.0380599	0.111398	Snrpd1(0.24), Snrnp40(0.15), Snrpb(0.13), Snrpe(0.1), Ddx23(0.1), Ddx23(0.1), Txnl4b(0.08), Prpf18(0.05), Cd2bp2(0.05), Cd2bp2(0.05), Prpf6(0.03), Snrpd2(0.02), Snrpd3(-0.06), Txnl4a(-0.09), Txnl4a(-0.09), Prpf8(-0.12), Prpf8(-0.12), Snrnp200(-0.13), Snrpn(-0.23), Snrpg(-0.24),
negative regulation of astrocyte differentiation	0.11516	0.296696	0.00753404	0.0341692	13	0.404964	0.102509	0.105317	0.0355431	0.191975	Nog(0.78), Nog(0.78), Mbd1(0.57), Hmga2(0.34), Id4(0.2), Atf5(0.15), Mycn(0.02), Dab1(0.01), Ntrk3(0.01), Mecp2(0), Kdm4a(-0.08), Nf1(-0.09), Fgfr3(-0.3),
positive regulation of NFAT protein import into nucleus	0.108322	0.298947	0.00754272	0.0341692	12	0.294981	0.0374902	0.206155	0.0443531	0.27666	Ppp3ca(0.14), Ppp3ca(0.14), Ppp3ca(0.14), Sppl3(0.14), Sppl3(0.14), Ppp3r1(0.11), Cherp(0.09), Ppp3cb(0), Slc9a1(-0.11), Ceacam1(-0.12), Akap6(-0.17), Tnf(-0.26),
oxidoreductase activity, acting on single donors with incorporation of molecular oxygen, incorporation of two atoms of oxygen	0.11159	0.312313	0.00762147	0.0344522	11	0.123779	0.0159665	0.153706	0.174084	0.434246	Aloxe3(1.37), Ptgs2(1.16), Alox5(0.77), Bco1(0.6), Cdo1(0.1), P4ha2(0.1), Ado(0.07), Alox12(-0.05), P4ha1(-0.14), Bco2(-0.62), Bco2(-0.62),
regulation of androgen receptor signaling pathway	0.121093	0.303656	0.00762616	0.0344522	12	0.184615	0.294192	0.0217712	0.164209	0.160948	Arrb2(0.21), Prmt2(0.17), Ddx5(0.07), Safb2(0.07), Safb2(0.07), Ep300(0.06), Park7(0.01), Trim68(0.01), Rnf6(-0.04), Rnf6(-0.04), Rnf14(-0.05), Pias2(-0.12),
Rho protein signal transduction	0.102832	0.15481	0.00763439	0.0344522	44	0.315474	0.00464812	0.142944	0.282269	0.241991	Cdc42ep3(0.56), Rhoj(0.31), Rhog(0.3), Gm14137(0.3), Myo9b(0.26), Myo9b(0.26), Rock2(0.23), Cdc42ep5(0.22), Cnksr1(0.2), Cdc42ep2(0.18), Gna13(0.16), Cdc42ep4(0.16), Cdc42ep1(0.15), Pecam1(0.13), Tax1bp3(0.13), Cdc42(0.12), Srgap1(0.12), Arhgdia(0.1), Ctnnal1(0.07), Rock1(0.06), Hacd3(0.06), Vangl2(0.04), Rhoa(0.02), Rhoa(0.02), Ednra(0.02), Eps8l1(0.02), Rtkn(0), Phactr4(0), Kalrn(0), Chuk(-0.07…
vesicle	0.0831702	0.110991	0.0077026	0.0346719	122	0.140091	0.0523033	0.0923068	0.143689	0.372991	Slc6a14(1.36), Il1b(0.74), Gprc5a(0.5), Il1rn(0.49), Clic1(0.41), Syt11(0.38), Trf(0.37), Pf4(0.34), Klc1(0.3), Npc1(0.3), Tuba1c(0.28), Rabgef1(0.28), A3galt2(0.27), Msn(0.25), Slc2a1(0.25), Ezr(0.23), Flot2(0.21), Snx1(0.21), Anxa1(0.2), Anxa7(0.18), Rab11a(0.18), Chmp4b(0.18), Cd59b(0.18), Ifngr1(0.17), Kcnc2(0.16), Ace(0.14), Ripk2(0.14), Slc30a7(0.13), Dctn2(0.13), Stx12(0.13), Gnb2(0.12), G…
histone methyltransferase activity (H3-K4 specific)	0.0807275	0.290991	0.00770269	0.0346719	20	0.037685	0.623369	0.0654786	0.0603721	0.186337	Setd1a(0.17), Setd1a(0.17), Cxxc1(0.15), Wdr5(0.12), Whsc1l1(0.08), Setd3(0.05), Kmt2b(0.05), Ash2l(0.04), Ash2l(0.04), Wdr82(0.03), Rbbp5(-0.01), Rbbp5(-0.01), Kmt2e(-0.07), Kmt2a(-0.07), Dpy30(-0.08), Ash1l(-0.1), Kmt2c(-0.12), Prdm9(-0.2), Prdm9(-0.2), Prdm9(-0.2),
long-chain fatty acid-CoA ligase activity	0.0761905	0.291324	0.00774602	0.0348227	18	0.494126	0.159334	0.370333	0.0359402	0.0116036	Acsl6(0.41), Acsl6(0.41), Acsl4(0.33), Acsl4(0.33), Acsl4(0.33), Slc27a4(0.12), Slc27a4(0.12), Slc27a4(0.12), Acsbg1(0.09), Acsbg1(0.09), Acsl5(-0.05), Acsl3(-0.09), Slc27a2(-0.1), Slc27a2(-0.1), Slc27a2(-0.1), Acsl1(-0.34), Slc27a3(-0.38), Slc27a1(-0.5),
fibrinolysis	0.107145	0.34566	0.00776135	0.034834	10	0.0152731	0.336126	0.155664	0.167564	0.197968	Fgb(1.88), Fgg(1.46), Fga(1.06), Anxa2(0.08), Pros1(0.04), Plau(-0.09), Hrg(-0.37), Serping1(-0.39), Cpb2(-0.52), Cpb2(-0.52),
histone acetyltransferase complex	0.112541	0.21407	0.00776823	0.034834	29	0.0432485	0.472007	0.130978	0.14177	0.0760911	Meaf6(0.26), Kansl2(0.25), Kat7(0.15), Wdr5(0.12), Ing4(0.11), Kansl1(0.11), Kat8(0.1), Kansl3(0.09), Mcrs1(0.08), Phf20(0.08), Phf20(0.08), Crebbp(0.07), Kat2b(0.07), Ep300(0.06), Ikbkap(0.03), Hcfc1(0.02), Jade3(0.02), Trrap(0), Jade2(-0.04), Ogt(-0.07), Kat2a(-0.08), Elp2(-0.08), Elp2(-0.08), Jade1(-0.13), Elp3(-0.16), Elp3(-0.16), Kansl1l(-0.18), Elp4(-0.28), Elp4(-0.28),
dopamine receptor signaling pathway	0.07757	0.35537	0.00779857	0.0349257	10	0.0769235	0.0285213	0.0181296	0.672767	0.332951	Drd1(0.57), Drd1(0.57), Drd1(0.57), Klf16(0.26), Gnao1(0.22), Gnai3(0.13), Htt(-0.06), Nsg1(-0.1), Rgs9(-0.12), Adcy6(-0.17),
histone acetylation	0.0889296	0.22439	0.00781757	0.0349666	28	0.0736267	0.582881	0.0939522	0.00415209	0.417217	Meaf6(0.26), Kat6b(0.22), Kat5(0.17), Ruvbl2(0.16), Ing5(0.16), Wdr75(0.16), Pcgf2(0.12), Ing4(0.11), Kat8(0.1), Crebbp(0.07), Kat2b(0.07), Ep300(0.06), Mrgbp(0.04), Ruvbl1(0.02), Mecp2(0), Trrap(0), Hat1(0), Mbd3(-0.01), Taf1(-0.01), Tada2a(-0.02), Csrp2bp(-0.03), Bmi1(-0.04), Kat2a(-0.08), Kat6a(-0.09), Hnf1a(-0.18), Supt3(-0.27), Mettl8(-0.27), Nat8f3(-0.79),
cholesterol transport	0.102848	0.225455	0.0078789	0.0351452	23	0.364006	0.0300065	0.318178	0.0775606	0.100979	Apoa1(0.51), Apoa1(0.51), Apoa1(0.51), Lcat(0.37), Npc1(0.3), Abcg1(0.15), Vps4b(0.11), Apob(0.11), Apob(0.11), Npc2(0.1), Npc2(0.1), Npc2(0.1), Msr1(0.08), Scarb1(0.06), Scarb1(0.06), Arv1(0), Cd36(-0.02), Apoa2(-0.06), Abca1(-0.11), Ldlr(-0.14), Ldlr(-0.14), Scp2(-0.2), Cftr(-0.35),
Notch binding	0.0748396	0.249659	0.00787967	0.0351452	20	0.353417	0.00165773	0.0955646	0.204618	0.518587	Chac1(0.76), 1810011O10Rik(0.31), Egfl7(0.23), Notch4(0.2), Dll4(0.2), Dll4(0.2), Hif1an(0.11), Jag1(0.08), Jag1(0.08), Ncor2(0.05), Galnt11(0.05), Notch1(0.03), Dll1(-0.03), Dll1(-0.03), Jag2(-0.03), Jag2(-0.03), Snw1(-0.03), Adam17(-0.1), Nov(-0.15), Aak1(-0.17),
DNA recombination	0.0946672	0.132399	0.00788731	0.0351452	69	0.0282819	0.391903	0.054801	0.117634	0.333541	Ercc1(0.62), Ercc1(0.62), Tfpt(0.35), H2afx(0.28), Kin(0.26), Lig4(0.22), Xrcc2(0.19), Ndnl2(0.19), Rpain(0.19), Smc5(0.18), Ruvbl2(0.16), Rad52(0.15), Nsmce2(0.14), Xrcc3(0.14), Xrcc4(0.14), Spidr(0.12), Rpa2(0.11), Ino80b(0.11), Xrn2(0.1), Polm(0.1), Ino80d(0.1), Setx(0.1), Swsap1(0.09), Hmgb2(0.09), Yy1(0.08), Mcrs1(0.08), Smc6(0.08), Actr5(0.08), Apex1(0.05), Morf4l1(0.05), Zswim7(0.05), Ino8…
RNA polymerase II transcription cofactor activity	0.106793	0.185041	0.00800298	0.0356158	37	0.0928266	0.261894	0.0157051	0.494198	0.10406	Med11(0.19), Pprc1(0.19), Med13l(0.15), Med4(0.13), Med4(0.13), Med19(0.12), Med15(0.11), Med21(0.11), Med6(0.1), Med31(0.09), Med26(0.09), Med26(0.09), Med8(0.09), Med18(0.07), Med22(0.06), Med7(0.06), Med13(0.05), Med13(0.05), Med12(0.04), Med9(0.04), Tdg(0.02), Med17(0.02), Thrap3(0.01), Med1(-0.01), Med1(-0.01), Med30(-0.05), Uxt(-0.06), Med14(-0.06), Med14(-0.06), Med24(-0.08), Med24(-0.08),…
lymph node development	0.0980174	0.223426	0.00811766	0.0360355	24	0.315261	0.0211716	0.11387	0.147644	0.270713	Ccr7(2.19), Il7r(0.56), Ltb(0.34), Nfkb2(0.27), Tgfb1(0.26), Nfkb1(0.24), Ikzf1(0.19), Ripk3(0.14), Rc3h2(0.13), Ltbr(0.12), Rc3h1(0.09), Polb(0.07), Flt3(0.04), Ccl21a(0.03), Fadd(-0.03), Jak3(-0.04), Tnfrsf11a(-0.1), Rorc(-0.24), Spns2(-0.34), Cd248(-0.35), Cxcl13(-0.39), Cxcl13(-0.39), Id2(-0.4), Il15(-0.43),
2-polyprenyl-6-methoxy-1,4-benzoquinone methyltransferase activity	0.0518282	0.176907	0.0081552	0.0361568	74	0.000123716	0.678821	0.47337	0.0775776	0.247637	Setd4(0.52), Prdm1(0.43), Mettl6(0.37), Trmt10a(0.28), Prdm4(0.24), Bmt2(0.21), Mettl22(0.15), Mepce(0.14), Mrm1(0.12), Mettl18(0.11), Trmt10c(0.09), Emg1(0.08), Ftsj3(0.08), Smyd2(0.08), Trmt11(0.07), Nsun5(0.07), Mettl25(0.07), Smyd5(0.07), Mettl2(0.06), Trmt10b(0.06), Mettl13(0.06), Fbl(0.05), Trmt2a(0.05), Setd6(0.05), Wbscr22(0.05), Mettl23(0.04), Ece2(0.04), Nop2(0.04), Tfb2m(0.03), Prmt5(0…
regulation of blood pressure	0.107612	0.178674	0.00817456	0.0361972	48	0.544782	0.0259883	0.108	0.138135	0.112747	Tac1(1.42), Ptgs2(1.16), Gch1(0.83), Gch1(0.83), Edn1(0.76), Edn1(0.76), Hmox1(0.61), Npy(0.61), Cyp4f18(0.17), Ace(0.14), Ace(0.14), Sod1(0.14), Ren1(0.13), Corin(0.11), Corin(0.11), Ahr(0.06), Ednrb(0.06), Ednrb(0.06), Ece1(0.06), Ramp2(0.01), P2rx4(0), Cyba(-0.01), Lnpep(-0.01), Dll1(-0.03), Enpep(-0.03), Cacna1c(-0.07), Erap1(-0.07), P2rx1(-0.08), Aoc3(-0.1), Agtrap(-0.14), Lrp5(-0.14), Gucy1…
DNA-methyltransferase activity	0.0567129	0.175179	0.00823457	0.0364174	76	0.000238149	0.64473	0.44056	0.069773	0.269864	Setd4(0.52), Prdm1(0.43), Mettl6(0.37), Trmt10a(0.28), Prdm4(0.24), Bmt2(0.21), Mettl22(0.15), Mepce(0.14), Mrm1(0.12), Mettl18(0.11), Trmt10c(0.09), Emg1(0.08), Ftsj3(0.08), Smyd2(0.08), Trmt11(0.07), Nsun5(0.07), Mettl25(0.07), Smyd5(0.07), Mettl2(0.06), Trmt10b(0.06), Mettl13(0.06), Fbl(0.05), Trmt2a(0.05), Setd6(0.05), Wbscr22(0.05), Mettl23(0.04), Ece2(0.04), Nop2(0.04), Tfb2m(0.03), Prmt5(0…
calcium ion regulated exocytosis	0.114888	0.267265	0.00824584	0.0364217	14	0.284659	0.0351613	0.192079	0.336981	0.0453331	Cacna1a(0.49), Stx1a(0.42), Rims3(0.3), Rims2(0.21), Chp1(0.2), Vamp3(0.17), Arhgap17(0.11), Vamp2(0.05), Vamp2(0.05), Rapgef4(0.03), Ppp3cb(0), Snapin(-0.02), Cacna1c(-0.07), Syt3(-0.57),
mitotic cell cycle checkpoint	0.0909902	0.199635	0.0084909	0.0366989	27	0.023593	0.53109	0.0967693	0.276731	0.0619824	Plk2(0.42), Zwint(0.31), Bcl2l1(0.28), Rps6(0.28), Rpl24(0.28), Cdkn2b(0.27), Mad2l1bp(0.27), Tgfb1(0.26), Mad2l1(0.17), Prcc(0.15), Hras(0.1), Wnt9a(0.1), Chfr(0.09), Chfr(0.09), Rad17(0.07), Smc1a(0.02), Pura(0.01), Trrap(0), Nbn(-0.03), Zwilch(-0.03), Zw10(-0.05), Nabp2(-0.06), Nabp1(-0.12), Ints3(-0.13), Hus1(-0.25), Chek1(-0.47), Kntc1(-1.08),
integral component of Golgi membrane	0.120682	0.149731	0.00851971	0.0366989	46	0.073799	0.119163	0.335668	0.193666	0.0779637	Tvp23a(0.54), Sgms2(0.31), Sgms2(0.31), Sgms2(0.31), Ier3ip1(0.29), Mfng(0.25), B4galnt1(0.24), Bet1l(0.24), St3gal1(0.2), Qsox1(0.19), Qsox1(0.19), St3gal4(0.17), Unc50(0.17), St8sia4(0.14), Tbc1d20(0.13), Acer3(0.1), Samd8(0.09), Slc35b1(0.09), Ndfip1(0.07), St3gal6(0.04), Acer2(0.04), St6gal1(0.03), Sgms1(0.03), Sgms1(0.03), Sgms1(0.03), Cux1(0.01), St3gal2(0), Rer1(-0.01), Ubiad1(-0.01), Tvp2…
regulation of protein localization	0.0814263	0.148242	0.00857125	0.0366989	58	0.502645	0.141597	0.128728	0.01437	0.172592	Celsr3(1.19), Nnat(0.43), Arhgdig(0.34), Cdh1(0.26), Swap70(0.21), Notch4(0.2), Fkbp1a(0.19), Mmd(0.17), Traf7(0.17), Dnajb6(0.15), Rsl1d1(0.15), Sgk1(0.14), Sept2(0.13), Sept2(0.13), Rab9(0.13), Cep120(0.13), Vps4a(0.12), Akt1(0.11), Akt1(0.11), Stx6(0.1), Arhgdia(0.1), Ptch1(0.09), Ptch1(0.09), Ralgapb(0.09), Tbc1d1(0.07), Nckap1(0.06), Ufl1(0.06), Tmem231(0.06), Wasl(0.05), Mapk8(0.04), Sycp1(…
chemoattractant activity	0.125423	0.235515	0.00857266	0.0366989	18	0.0560723	0.113202	0.414311	0.086607	0.170265	Saa3(2.67), Saa1(1.34), Pdgfb(0.25), Vegfc(0.19), Hgf(0.16), Lgals3(0.14), Mif(0.12), Fgf7(0.11), Alkbh1(0.1), Hmgb2(0.09), Vegfa(0.06), Ccl5(0.03), Fgf2(-0.03), Ntf3(-0.07), Bmp4(-0.15), Vegfd(-0.8), Cxcl12(-0.81), Saa4(-0.88),
RNA methyltransferase activity	0.0548184	0.17695	0.0086012	0.0366989	75	0.000226738	0.662155	0.489176	0.0677018	0.236268	Setd4(0.52), Prdm1(0.43), Mettl6(0.37), Trmt10a(0.28), Prdm4(0.24), Bmt2(0.21), Mettl22(0.15), Mepce(0.14), Mrm1(0.12), Mettl18(0.11), Trmt10c(0.09), Emg1(0.08), Ftsj3(0.08), Smyd2(0.08), Mettl3(0.07), Trmt11(0.07), Nsun5(0.07), Mettl25(0.07), Smyd5(0.07), Mettl2(0.06), Trmt10b(0.06), Mettl13(0.06), Fbl(0.05), Trmt2a(0.05), Setd6(0.05), Wbscr22(0.05), Mettl23(0.04), Ece2(0.04), Nop2(0.04), Tfb2m(…
positive regulation of lamellipodium assembly	0.115431	0.245484	0.00867912	0.0366989	17	0.118622	0.131993	0.0219804	0.257355	0.361383	Hsp90aa1(0.65), Rac1(0.3), Twf2(0.25), Rac2(0.23), Rac2(0.23), Fscn1(0.18), Arpc2(0.17), Actr3(0.14), Wasf2(0.09), Nckap1(0.06), Hdac4(0.06), Brk1(0.05), Dnm2(0.01), Mtor(-0.07), Carmil2(-0.1), Aqp1(-0.21), Atp7a(-0.32),
negative regulation of DNA damage response, signal transduction by p53 class mediator	0.0820933	0.263124	0.00872728	0.0366989	16	0.126926	0.00296499	0.36865	0.239781	0.351972	Cd44(0.33), Cd44(0.33), Kdm1a(0.27), Sirt1(0.2), Senp2(0.18), Psmd10(0.15), Pttg1ip(0.14), Mif(0.12), Mif(0.12), Dyrk1a(0.11), Mdm2(0.1), Twist1(0.07), Cd74(-0.05), Cd74(-0.05), Snai1(-0.27), Snai2(-0.48),
beta-tubulin binding	0.106534	0.170128	0.00874059	0.0366989	37	0.226847	0.547003	0.184092	0.0276263	0.0310269	Casc1(0.59), Rgs2(0.42), Syt11(0.38), Pdcd5(0.31), Emd(0.23), Gja1(0.23), Map1s(0.22), Map1s(0.22), Spast(0.16), Capzb(0.14), Cct5(0.14), Ttll7(0.11), Ranbp10(0.11), Tbca(0.07), Hdac6(0.06), Snca(0.05), Ift74(0.04), Ift74(0.04), Sirt2(0.03), Ndel1(0.03), Bbs4(0.01), Arl8b(-0.02), Tbcd(-0.03), Tbcd(-0.03), Vapb(-0.04), Adnp(-0.06), Htt(-0.06), Uxt(-0.06), Uxt(-0.06), Trpv4(-0.07), Pex14(-0.08), Bc…
endothelial cell morphogenesis	0.0981191	0.317349	0.00875276	0.0366989	10	0.0765363	0.00611848	0.427689	0.336057	0.219703	Clic4(0.32), Notch4(0.2), Stc1(0.19), Plod3(0.16), Id1(0.15), Pecam1(0.13), Arhgef26(0.04), Heg1(-0.01), Met(-0.03), Col18a1(-0.04),
protein peptidyl-prolyl isomerization	0.115677	0.230976	0.00875745	0.0366989	20	0.0683244	0.525885	0.126131	0.0381293	0.165745	Fkbp1a(0.19), Ppie(0.17), Ppil4(0.12), Ppid(0.1), Ppig(0.1), Ppic(0.09), Ppia(0.08), Cwc27(0.07), Fkbp5(0.06), Ppil1(0.05), Nktr(0.03), Ppil3(0.03), Fkbp4(0.02), Ranbp2(0.01), Ppil2(0.01), Ppib(-0.01), Ppif(-0.03), Ppil6(-0.08), Ppwd1(-0.11), Fkbp1b(-0.21),
insulin-like growth factor I binding	0.0953026	0.284368	0.00877209	0.0366989	17	0.55241	0.0309879	0.0984917	0.35337	0.0280836	Itgb3(0.82), Igfbp1(0.73), Igfbp1(0.73), Igfbp3(0.67), Igfbp3(0.67), Itgav(0.19), Igf1r(-0.05), Igfbp6(-0.05), Igfbp6(-0.05), Itga6(-0.07), Itgb4(-0.1), Insr(-0.11), Igfbp4(-0.15), Igfbp5(-0.31), Igfbp5(-0.31), Igfbp2(-0.78), Igfbp2(-0.78),
C-methyltransferase activity	0.0541603	0.176812	0.0088791	0.0366989	73	0.00017031	0.651832	0.489327	0.0753348	0.259481	Setd4(0.52), Prdm1(0.43), Mettl6(0.37), Trmt10a(0.28), Prdm4(0.24), Bmt2(0.21), Mettl22(0.15), Mepce(0.14), Mrm1(0.12), Mettl18(0.11), Trmt10c(0.09), Emg1(0.08), Ftsj3(0.08), Smyd2(0.08), Trmt11(0.07), Nsun5(0.07), Mettl25(0.07), Smyd5(0.07), Mettl2(0.06), Trmt10b(0.06), Mettl13(0.06), Fbl(0.05), Trmt2a(0.05), Setd6(0.05), Wbscr22(0.05), Mettl23(0.04), Ece2(0.04), Nop2(0.04), Tfb2m(0.03), Prmt5(0…
S-methyltransferase activity	0.0541603	0.176812	0.0088791	0.0366989	73	0.00017031	0.651832	0.489327	0.0753348	0.259481	Setd4(0.52), Prdm1(0.43), Mettl6(0.37), Trmt10a(0.28), Prdm4(0.24), Bmt2(0.21), Mettl22(0.15), Mepce(0.14), Mrm1(0.12), Mettl18(0.11), Trmt10c(0.09), Emg1(0.08), Ftsj3(0.08), Smyd2(0.08), Trmt11(0.07), Nsun5(0.07), Mettl25(0.07), Smyd5(0.07), Mettl2(0.06), Trmt10b(0.06), Mettl13(0.06), Fbl(0.05), Trmt2a(0.05), Setd6(0.05), Wbscr22(0.05), Mettl23(0.04), Ece2(0.04), Nop2(0.04), Tfb2m(0.03), Prmt5(0…
mRNA methyltransferase activity	0.0541603	0.176812	0.0088791	0.0366989	73	0.00017031	0.651832	0.489327	0.0753348	0.259481	Setd4(0.52), Prdm1(0.43), Mettl6(0.37), Trmt10a(0.28), Prdm4(0.24), Bmt2(0.21), Mettl22(0.15), Mepce(0.14), Mrm1(0.12), Mettl18(0.11), Trmt10c(0.09), Emg1(0.08), Ftsj3(0.08), Smyd2(0.08), Trmt11(0.07), Nsun5(0.07), Mettl25(0.07), Smyd5(0.07), Mettl2(0.06), Trmt10b(0.06), Mettl13(0.06), Fbl(0.05), Trmt2a(0.05), Setd6(0.05), Wbscr22(0.05), Mettl23(0.04), Ece2(0.04), Nop2(0.04), Tfb2m(0.03), Prmt5(0…
rRNA methyltransferase activity	0.0541603	0.176812	0.0088791	0.0366989	73	0.00017031	0.651832	0.489327	0.0753348	0.259481	Setd4(0.52), Prdm1(0.43), Mettl6(0.37), Trmt10a(0.28), Prdm4(0.24), Bmt2(0.21), Mettl22(0.15), Mepce(0.14), Mrm1(0.12), Mettl18(0.11), Trmt10c(0.09), Emg1(0.08), Ftsj3(0.08), Smyd2(0.08), Trmt11(0.07), Nsun5(0.07), Mettl25(0.07), Smyd5(0.07), Mettl2(0.06), Trmt10b(0.06), Mettl13(0.06), Fbl(0.05), Trmt2a(0.05), Setd6(0.05), Wbscr22(0.05), Mettl23(0.04), Ece2(0.04), Nop2(0.04), Tfb2m(0.03), Prmt5(0…
rRNA (uridine-2'-O-)-methyltransferase activity	0.0541603	0.176812	0.0088791	0.0366989	73	0.00017031	0.651832	0.489327	0.0753348	0.259481	Setd4(0.52), Prdm1(0.43), Mettl6(0.37), Trmt10a(0.28), Prdm4(0.24), Bmt2(0.21), Mettl22(0.15), Mepce(0.14), Mrm1(0.12), Mettl18(0.11), Trmt10c(0.09), Emg1(0.08), Ftsj3(0.08), Smyd2(0.08), Trmt11(0.07), Nsun5(0.07), Mettl25(0.07), Smyd5(0.07), Mettl2(0.06), Trmt10b(0.06), Mettl13(0.06), Fbl(0.05), Trmt2a(0.05), Setd6(0.05), Wbscr22(0.05), Mettl23(0.04), Ece2(0.04), Nop2(0.04), Tfb2m(0.03), Prmt5(0…
rRNA (adenine-N6-)-methyltransferase activity	0.0541603	0.176812	0.0088791	0.0366989	73	0.00017031	0.651832	0.489327	0.0753348	0.259481	Setd4(0.52), Prdm1(0.43), Mettl6(0.37), Trmt10a(0.28), Prdm4(0.24), Bmt2(0.21), Mettl22(0.15), Mepce(0.14), Mrm1(0.12), Mettl18(0.11), Trmt10c(0.09), Emg1(0.08), Ftsj3(0.08), Smyd2(0.08), Trmt11(0.07), Nsun5(0.07), Mettl25(0.07), Smyd5(0.07), Mettl2(0.06), Trmt10b(0.06), Mettl13(0.06), Fbl(0.05), Trmt2a(0.05), Setd6(0.05), Wbscr22(0.05), Mettl23(0.04), Ece2(0.04), Nop2(0.04), Tfb2m(0.03), Prmt5(0…
rRNA (cytosine-C5-)-methyltransferase activity	0.0541603	0.176812	0.0088791	0.0366989	73	0.00017031	0.651832	0.489327	0.0753348	0.259481	Setd4(0.52), Prdm1(0.43), Mettl6(0.37), Trmt10a(0.28), Prdm4(0.24), Bmt2(0.21), Mettl22(0.15), Mepce(0.14), Mrm1(0.12), Mettl18(0.11), Trmt10c(0.09), Emg1(0.08), Ftsj3(0.08), Smyd2(0.08), Trmt11(0.07), Nsun5(0.07), Mettl25(0.07), Smyd5(0.07), Mettl2(0.06), Trmt10b(0.06), Mettl13(0.06), Fbl(0.05), Trmt2a(0.05), Setd6(0.05), Wbscr22(0.05), Mettl23(0.04), Ece2(0.04), Nop2(0.04), Tfb2m(0.03), Prmt5(0…
selenocysteine methyltransferase activity	0.0541603	0.176812	0.0088791	0.0366989	73	0.00017031	0.651832	0.489327	0.0753348	0.259481	Setd4(0.52), Prdm1(0.43), Mettl6(0.37), Trmt10a(0.28), Prdm4(0.24), Bmt2(0.21), Mettl22(0.15), Mepce(0.14), Mrm1(0.12), Mettl18(0.11), Trmt10c(0.09), Emg1(0.08), Ftsj3(0.08), Smyd2(0.08), Trmt11(0.07), Nsun5(0.07), Mettl25(0.07), Smyd5(0.07), Mettl2(0.06), Trmt10b(0.06), Mettl13(0.06), Fbl(0.05), Trmt2a(0.05), Setd6(0.05), Wbscr22(0.05), Mettl23(0.04), Ece2(0.04), Nop2(0.04), Tfb2m(0.03), Prmt5(0…
arginine N-methyltransferase activity	0.0541603	0.176812	0.0088791	0.0366989	73	0.00017031	0.651832	0.489327	0.0753348	0.259481	Setd4(0.52), Prdm1(0.43), Mettl6(0.37), Trmt10a(0.28), Prdm4(0.24), Bmt2(0.21), Mettl22(0.15), Mepce(0.14), Mrm1(0.12), Mettl18(0.11), Trmt10c(0.09), Emg1(0.08), Ftsj3(0.08), Smyd2(0.08), Trmt11(0.07), Nsun5(0.07), Mettl25(0.07), Smyd5(0.07), Mettl2(0.06), Trmt10b(0.06), Mettl13(0.06), Fbl(0.05), Trmt2a(0.05), Setd6(0.05), Wbscr22(0.05), Mettl23(0.04), Ece2(0.04), Nop2(0.04), Tfb2m(0.03), Prmt5(0…
lysine N-methyltransferase activity	0.0541603	0.176812	0.0088791	0.0366989	73	0.00017031	0.651832	0.489327	0.0753348	0.259481	Setd4(0.52), Prdm1(0.43), Mettl6(0.37), Trmt10a(0.28), Prdm4(0.24), Bmt2(0.21), Mettl22(0.15), Mepce(0.14), Mrm1(0.12), Mettl18(0.11), Trmt10c(0.09), Emg1(0.08), Ftsj3(0.08), Smyd2(0.08), Trmt11(0.07), Nsun5(0.07), Mettl25(0.07), Smyd5(0.07), Mettl2(0.06), Trmt10b(0.06), Mettl13(0.06), Fbl(0.05), Trmt2a(0.05), Setd6(0.05), Wbscr22(0.05), Mettl23(0.04), Ece2(0.04), Nop2(0.04), Tfb2m(0.03), Prmt5(0…
tRNA (adenine) methyltransferase activity	0.0541603	0.176812	0.0088791	0.0366989	73	0.00017031	0.651832	0.489327	0.0753348	0.259481	Setd4(0.52), Prdm1(0.43), Mettl6(0.37), Trmt10a(0.28), Prdm4(0.24), Bmt2(0.21), Mettl22(0.15), Mepce(0.14), Mrm1(0.12), Mettl18(0.11), Trmt10c(0.09), Emg1(0.08), Ftsj3(0.08), Smyd2(0.08), Trmt11(0.07), Nsun5(0.07), Mettl25(0.07), Smyd5(0.07), Mettl2(0.06), Trmt10b(0.06), Mettl13(0.06), Fbl(0.05), Trmt2a(0.05), Setd6(0.05), Wbscr22(0.05), Mettl23(0.04), Ece2(0.04), Nop2(0.04), Tfb2m(0.03), Prmt5(0…
tRNA (cytosine) methyltransferase activity	0.0541603	0.176812	0.0088791	0.0366989	73	0.00017031	0.651832	0.489327	0.0753348	0.259481	Setd4(0.52), Prdm1(0.43), Mettl6(0.37), Trmt10a(0.28), Prdm4(0.24), Bmt2(0.21), Mettl22(0.15), Mepce(0.14), Mrm1(0.12), Mettl18(0.11), Trmt10c(0.09), Emg1(0.08), Ftsj3(0.08), Smyd2(0.08), Trmt11(0.07), Nsun5(0.07), Mettl25(0.07), Smyd5(0.07), Mettl2(0.06), Trmt10b(0.06), Mettl13(0.06), Fbl(0.05), Trmt2a(0.05), Setd6(0.05), Wbscr22(0.05), Mettl23(0.04), Ece2(0.04), Nop2(0.04), Tfb2m(0.03), Prmt5(0…
rRNA (adenine) methyltransferase activity	0.0541603	0.176812	0.0088791	0.0366989	73	0.00017031	0.651832	0.489327	0.0753348	0.259481	Setd4(0.52), Prdm1(0.43), Mettl6(0.37), Trmt10a(0.28), Prdm4(0.24), Bmt2(0.21), Mettl22(0.15), Mepce(0.14), Mrm1(0.12), Mettl18(0.11), Trmt10c(0.09), Emg1(0.08), Ftsj3(0.08), Smyd2(0.08), Trmt11(0.07), Nsun5(0.07), Mettl25(0.07), Smyd5(0.07), Mettl2(0.06), Trmt10b(0.06), Mettl13(0.06), Fbl(0.05), Trmt2a(0.05), Setd6(0.05), Wbscr22(0.05), Mettl23(0.04), Ece2(0.04), Nop2(0.04), Tfb2m(0.03), Prmt5(0…
rRNA (cytosine) methyltransferase activity	0.0541603	0.176812	0.0088791	0.0366989	73	0.00017031	0.651832	0.489327	0.0753348	0.259481	Setd4(0.52), Prdm1(0.43), Mettl6(0.37), Trmt10a(0.28), Prdm4(0.24), Bmt2(0.21), Mettl22(0.15), Mepce(0.14), Mrm1(0.12), Mettl18(0.11), Trmt10c(0.09), Emg1(0.08), Ftsj3(0.08), Smyd2(0.08), Trmt11(0.07), Nsun5(0.07), Mettl25(0.07), Smyd5(0.07), Mettl2(0.06), Trmt10b(0.06), Mettl13(0.06), Fbl(0.05), Trmt2a(0.05), Setd6(0.05), Wbscr22(0.05), Mettl23(0.04), Ece2(0.04), Nop2(0.04), Tfb2m(0.03), Prmt5(0…
rRNA (guanine) methyltransferase activity	0.0541603	0.176812	0.0088791	0.0366989	73	0.00017031	0.651832	0.489327	0.0753348	0.259481	Setd4(0.52), Prdm1(0.43), Mettl6(0.37), Trmt10a(0.28), Prdm4(0.24), Bmt2(0.21), Mettl22(0.15), Mepce(0.14), Mrm1(0.12), Mettl18(0.11), Trmt10c(0.09), Emg1(0.08), Ftsj3(0.08), Smyd2(0.08), Trmt11(0.07), Nsun5(0.07), Mettl25(0.07), Smyd5(0.07), Mettl2(0.06), Trmt10b(0.06), Mettl13(0.06), Fbl(0.05), Trmt2a(0.05), Setd6(0.05), Wbscr22(0.05), Mettl23(0.04), Ece2(0.04), Nop2(0.04), Tfb2m(0.03), Prmt5(0…
rRNA (uridine) methyltransferase activity	0.0541603	0.176812	0.0088791	0.0366989	73	0.00017031	0.651832	0.489327	0.0753348	0.259481	Setd4(0.52), Prdm1(0.43), Mettl6(0.37), Trmt10a(0.28), Prdm4(0.24), Bmt2(0.21), Mettl22(0.15), Mepce(0.14), Mrm1(0.12), Mettl18(0.11), Trmt10c(0.09), Emg1(0.08), Ftsj3(0.08), Smyd2(0.08), Trmt11(0.07), Nsun5(0.07), Mettl25(0.07), Smyd5(0.07), Mettl2(0.06), Trmt10b(0.06), Mettl13(0.06), Fbl(0.05), Trmt2a(0.05), Setd6(0.05), Wbscr22(0.05), Mettl23(0.04), Ece2(0.04), Nop2(0.04), Tfb2m(0.03), Prmt5(0…
1-phenanthrol methyltransferase activity	0.0541603	0.176812	0.0088791	0.0366989	73	0.00017031	0.651832	0.489327	0.0753348	0.259481	Setd4(0.52), Prdm1(0.43), Mettl6(0.37), Trmt10a(0.28), Prdm4(0.24), Bmt2(0.21), Mettl22(0.15), Mepce(0.14), Mrm1(0.12), Mettl18(0.11), Trmt10c(0.09), Emg1(0.08), Ftsj3(0.08), Smyd2(0.08), Trmt11(0.07), Nsun5(0.07), Mettl25(0.07), Smyd5(0.07), Mettl2(0.06), Trmt10b(0.06), Mettl13(0.06), Fbl(0.05), Trmt2a(0.05), Setd6(0.05), Wbscr22(0.05), Mettl23(0.04), Ece2(0.04), Nop2(0.04), Tfb2m(0.03), Prmt5(0…
protein-arginine N5-methyltransferase activity	0.0541603	0.176812	0.0088791	0.0366989	73	0.00017031	0.651832	0.489327	0.0753348	0.259481	Setd4(0.52), Prdm1(0.43), Mettl6(0.37), Trmt10a(0.28), Prdm4(0.24), Bmt2(0.21), Mettl22(0.15), Mepce(0.14), Mrm1(0.12), Mettl18(0.11), Trmt10c(0.09), Emg1(0.08), Ftsj3(0.08), Smyd2(0.08), Trmt11(0.07), Nsun5(0.07), Mettl25(0.07), Smyd5(0.07), Mettl2(0.06), Trmt10b(0.06), Mettl13(0.06), Fbl(0.05), Trmt2a(0.05), Setd6(0.05), Wbscr22(0.05), Mettl23(0.04), Ece2(0.04), Nop2(0.04), Tfb2m(0.03), Prmt5(0…
dimethylarsinite methyltransferase activity	0.0541603	0.176812	0.0088791	0.0366989	73	0.00017031	0.651832	0.489327	0.0753348	0.259481	Setd4(0.52), Prdm1(0.43), Mettl6(0.37), Trmt10a(0.28), Prdm4(0.24), Bmt2(0.21), Mettl22(0.15), Mepce(0.14), Mrm1(0.12), Mettl18(0.11), Trmt10c(0.09), Emg1(0.08), Ftsj3(0.08), Smyd2(0.08), Trmt11(0.07), Nsun5(0.07), Mettl25(0.07), Smyd5(0.07), Mettl2(0.06), Trmt10b(0.06), Mettl13(0.06), Fbl(0.05), Trmt2a(0.05), Setd6(0.05), Wbscr22(0.05), Mettl23(0.04), Ece2(0.04), Nop2(0.04), Tfb2m(0.03), Prmt5(0…
4,5-dihydroxybenzo(a)pyrene methyltransferase activity	0.0541603	0.176812	0.0088791	0.0366989	73	0.00017031	0.651832	0.489327	0.0753348	0.259481	Setd4(0.52), Prdm1(0.43), Mettl6(0.37), Trmt10a(0.28), Prdm4(0.24), Bmt2(0.21), Mettl22(0.15), Mepce(0.14), Mrm1(0.12), Mettl18(0.11), Trmt10c(0.09), Emg1(0.08), Ftsj3(0.08), Smyd2(0.08), Trmt11(0.07), Nsun5(0.07), Mettl25(0.07), Smyd5(0.07), Mettl2(0.06), Trmt10b(0.06), Mettl13(0.06), Fbl(0.05), Trmt2a(0.05), Setd6(0.05), Wbscr22(0.05), Mettl23(0.04), Ece2(0.04), Nop2(0.04), Tfb2m(0.03), Prmt5(0…
1-hydroxypyrene methyltransferase activity	0.0541603	0.176812	0.0088791	0.0366989	73	0.00017031	0.651832	0.489327	0.0753348	0.259481	Setd4(0.52), Prdm1(0.43), Mettl6(0.37), Trmt10a(0.28), Prdm4(0.24), Bmt2(0.21), Mettl22(0.15), Mepce(0.14), Mrm1(0.12), Mettl18(0.11), Trmt10c(0.09), Emg1(0.08), Ftsj3(0.08), Smyd2(0.08), Trmt11(0.07), Nsun5(0.07), Mettl25(0.07), Smyd5(0.07), Mettl2(0.06), Trmt10b(0.06), Mettl13(0.06), Fbl(0.05), Trmt2a(0.05), Setd6(0.05), Wbscr22(0.05), Mettl23(0.04), Ece2(0.04), Nop2(0.04), Tfb2m(0.03), Prmt5(0…
1-hydroxy-6-methoxypyrene methyltransferase activity	0.0541603	0.176812	0.0088791	0.0366989	73	0.00017031	0.651832	0.489327	0.0753348	0.259481	Setd4(0.52), Prdm1(0.43), Mettl6(0.37), Trmt10a(0.28), Prdm4(0.24), Bmt2(0.21), Mettl22(0.15), Mepce(0.14), Mrm1(0.12), Mettl18(0.11), Trmt10c(0.09), Emg1(0.08), Ftsj3(0.08), Smyd2(0.08), Trmt11(0.07), Nsun5(0.07), Mettl25(0.07), Smyd5(0.07), Mettl2(0.06), Trmt10b(0.06), Mettl13(0.06), Fbl(0.05), Trmt2a(0.05), Setd6(0.05), Wbscr22(0.05), Mettl23(0.04), Ece2(0.04), Nop2(0.04), Tfb2m(0.03), Prmt5(0…
demethylmenaquinone methyltransferase activity	0.0541603	0.176812	0.0088791	0.0366989	73	0.00017031	0.651832	0.489327	0.0753348	0.259481	Setd4(0.52), Prdm1(0.43), Mettl6(0.37), Trmt10a(0.28), Prdm4(0.24), Bmt2(0.21), Mettl22(0.15), Mepce(0.14), Mrm1(0.12), Mettl18(0.11), Trmt10c(0.09), Emg1(0.08), Ftsj3(0.08), Smyd2(0.08), Trmt11(0.07), Nsun5(0.07), Mettl25(0.07), Smyd5(0.07), Mettl2(0.06), Trmt10b(0.06), Mettl13(0.06), Fbl(0.05), Trmt2a(0.05), Setd6(0.05), Wbscr22(0.05), Mettl23(0.04), Ece2(0.04), Nop2(0.04), Tfb2m(0.03), Prmt5(0…
cobalt-precorrin-6B C5-methyltransferase activity	0.0541603	0.176812	0.0088791	0.0366989	73	0.00017031	0.651832	0.489327	0.0753348	0.259481	Setd4(0.52), Prdm1(0.43), Mettl6(0.37), Trmt10a(0.28), Prdm4(0.24), Bmt2(0.21), Mettl22(0.15), Mepce(0.14), Mrm1(0.12), Mettl18(0.11), Trmt10c(0.09), Emg1(0.08), Ftsj3(0.08), Smyd2(0.08), Trmt11(0.07), Nsun5(0.07), Mettl25(0.07), Smyd5(0.07), Mettl2(0.06), Trmt10b(0.06), Mettl13(0.06), Fbl(0.05), Trmt2a(0.05), Setd6(0.05), Wbscr22(0.05), Mettl23(0.04), Ece2(0.04), Nop2(0.04), Tfb2m(0.03), Prmt5(0…
cobalt-precorrin-7 C15-methyltransferase activity	0.0541603	0.176812	0.0088791	0.0366989	73	0.00017031	0.651832	0.489327	0.0753348	0.259481	Setd4(0.52), Prdm1(0.43), Mettl6(0.37), Trmt10a(0.28), Prdm4(0.24), Bmt2(0.21), Mettl22(0.15), Mepce(0.14), Mrm1(0.12), Mettl18(0.11), Trmt10c(0.09), Emg1(0.08), Ftsj3(0.08), Smyd2(0.08), Trmt11(0.07), Nsun5(0.07), Mettl25(0.07), Smyd5(0.07), Mettl2(0.06), Trmt10b(0.06), Mettl13(0.06), Fbl(0.05), Trmt2a(0.05), Setd6(0.05), Wbscr22(0.05), Mettl23(0.04), Ece2(0.04), Nop2(0.04), Tfb2m(0.03), Prmt5(0…
cobalt-precorrin-5B C1-methyltransferase activity	0.0541603	0.176812	0.0088791	0.0366989	73	0.00017031	0.651832	0.489327	0.0753348	0.259481	Setd4(0.52), Prdm1(0.43), Mettl6(0.37), Trmt10a(0.28), Prdm4(0.24), Bmt2(0.21), Mettl22(0.15), Mepce(0.14), Mrm1(0.12), Mettl18(0.11), Trmt10c(0.09), Emg1(0.08), Ftsj3(0.08), Smyd2(0.08), Trmt11(0.07), Nsun5(0.07), Mettl25(0.07), Smyd5(0.07), Mettl2(0.06), Trmt10b(0.06), Mettl13(0.06), Fbl(0.05), Trmt2a(0.05), Setd6(0.05), Wbscr22(0.05), Mettl23(0.04), Ece2(0.04), Nop2(0.04), Tfb2m(0.03), Prmt5(0…
cobalt-precorrin-3 C17-methyltransferase activity	0.0541603	0.176812	0.0088791	0.0366989	73	0.00017031	0.651832	0.489327	0.0753348	0.259481	Setd4(0.52), Prdm1(0.43), Mettl6(0.37), Trmt10a(0.28), Prdm4(0.24), Bmt2(0.21), Mettl22(0.15), Mepce(0.14), Mrm1(0.12), Mettl18(0.11), Trmt10c(0.09), Emg1(0.08), Ftsj3(0.08), Smyd2(0.08), Trmt11(0.07), Nsun5(0.07), Mettl25(0.07), Smyd5(0.07), Mettl2(0.06), Trmt10b(0.06), Mettl13(0.06), Fbl(0.05), Trmt2a(0.05), Setd6(0.05), Wbscr22(0.05), Mettl23(0.04), Ece2(0.04), Nop2(0.04), Tfb2m(0.03), Prmt5(0…
dimethylamine methyltransferase activity	0.0541603	0.176812	0.0088791	0.0366989	73	0.00017031	0.651832	0.489327	0.0753348	0.259481	Setd4(0.52), Prdm1(0.43), Mettl6(0.37), Trmt10a(0.28), Prdm4(0.24), Bmt2(0.21), Mettl22(0.15), Mepce(0.14), Mrm1(0.12), Mettl18(0.11), Trmt10c(0.09), Emg1(0.08), Ftsj3(0.08), Smyd2(0.08), Trmt11(0.07), Nsun5(0.07), Mettl25(0.07), Smyd5(0.07), Mettl2(0.06), Trmt10b(0.06), Mettl13(0.06), Fbl(0.05), Trmt2a(0.05), Setd6(0.05), Wbscr22(0.05), Mettl23(0.04), Ece2(0.04), Nop2(0.04), Tfb2m(0.03), Prmt5(0…
hydroxyneurosporene-O-methyltransferase activity	0.0541603	0.176812	0.0088791	0.0366989	73	0.00017031	0.651832	0.489327	0.0753348	0.259481	Setd4(0.52), Prdm1(0.43), Mettl6(0.37), Trmt10a(0.28), Prdm4(0.24), Bmt2(0.21), Mettl22(0.15), Mepce(0.14), Mrm1(0.12), Mettl18(0.11), Trmt10c(0.09), Emg1(0.08), Ftsj3(0.08), Smyd2(0.08), Trmt11(0.07), Nsun5(0.07), Mettl25(0.07), Smyd5(0.07), Mettl2(0.06), Trmt10b(0.06), Mettl13(0.06), Fbl(0.05), Trmt2a(0.05), Setd6(0.05), Wbscr22(0.05), Mettl23(0.04), Ece2(0.04), Nop2(0.04), Tfb2m(0.03), Prmt5(0…
tRNA (adenine-57, 58-N(1)-) methyltransferase activity	0.0541603	0.176812	0.0088791	0.0366989	73	0.00017031	0.651832	0.489327	0.0753348	0.259481	Setd4(0.52), Prdm1(0.43), Mettl6(0.37), Trmt10a(0.28), Prdm4(0.24), Bmt2(0.21), Mettl22(0.15), Mepce(0.14), Mrm1(0.12), Mettl18(0.11), Trmt10c(0.09), Emg1(0.08), Ftsj3(0.08), Smyd2(0.08), Trmt11(0.07), Nsun5(0.07), Mettl25(0.07), Smyd5(0.07), Mettl2(0.06), Trmt10b(0.06), Mettl13(0.06), Fbl(0.05), Trmt2a(0.05), Setd6(0.05), Wbscr22(0.05), Mettl23(0.04), Ece2(0.04), Nop2(0.04), Tfb2m(0.03), Prmt5(0…
methylamine-specific methylcobalamin:coenzyme M methyltransferase activity	0.0541603	0.176812	0.0088791	0.0366989	73	0.00017031	0.651832	0.489327	0.0753348	0.259481	Setd4(0.52), Prdm1(0.43), Mettl6(0.37), Trmt10a(0.28), Prdm4(0.24), Bmt2(0.21), Mettl22(0.15), Mepce(0.14), Mrm1(0.12), Mettl18(0.11), Trmt10c(0.09), Emg1(0.08), Ftsj3(0.08), Smyd2(0.08), Trmt11(0.07), Nsun5(0.07), Mettl25(0.07), Smyd5(0.07), Mettl2(0.06), Trmt10b(0.06), Mettl13(0.06), Fbl(0.05), Trmt2a(0.05), Setd6(0.05), Wbscr22(0.05), Mettl23(0.04), Ece2(0.04), Nop2(0.04), Tfb2m(0.03), Prmt5(0…
trimethylamine methyltransferase activity	0.0541603	0.176812	0.0088791	0.0366989	73	0.00017031	0.651832	0.489327	0.0753348	0.259481	Setd4(0.52), Prdm1(0.43), Mettl6(0.37), Trmt10a(0.28), Prdm4(0.24), Bmt2(0.21), Mettl22(0.15), Mepce(0.14), Mrm1(0.12), Mettl18(0.11), Trmt10c(0.09), Emg1(0.08), Ftsj3(0.08), Smyd2(0.08), Trmt11(0.07), Nsun5(0.07), Mettl25(0.07), Smyd5(0.07), Mettl2(0.06), Trmt10b(0.06), Mettl13(0.06), Fbl(0.05), Trmt2a(0.05), Setd6(0.05), Wbscr22(0.05), Mettl23(0.04), Ece2(0.04), Nop2(0.04), Tfb2m(0.03), Prmt5(0…
methanol-specific methylcobalamin:coenzyme M methyltransferase activity	0.0541603	0.176812	0.0088791	0.0366989	73	0.00017031	0.651832	0.489327	0.0753348	0.259481	Setd4(0.52), Prdm1(0.43), Mettl6(0.37), Trmt10a(0.28), Prdm4(0.24), Bmt2(0.21), Mettl22(0.15), Mepce(0.14), Mrm1(0.12), Mettl18(0.11), Trmt10c(0.09), Emg1(0.08), Ftsj3(0.08), Smyd2(0.08), Trmt11(0.07), Nsun5(0.07), Mettl25(0.07), Smyd5(0.07), Mettl2(0.06), Trmt10b(0.06), Mettl13(0.06), Fbl(0.05), Trmt2a(0.05), Setd6(0.05), Wbscr22(0.05), Mettl23(0.04), Ece2(0.04), Nop2(0.04), Tfb2m(0.03), Prmt5(0…
monomethylamine methyltransferase activity	0.0541603	0.176812	0.0088791	0.0366989	73	0.00017031	0.651832	0.489327	0.0753348	0.259481	Setd4(0.52), Prdm1(0.43), Mettl6(0.37), Trmt10a(0.28), Prdm4(0.24), Bmt2(0.21), Mettl22(0.15), Mepce(0.14), Mrm1(0.12), Mettl18(0.11), Trmt10c(0.09), Emg1(0.08), Ftsj3(0.08), Smyd2(0.08), Trmt11(0.07), Nsun5(0.07), Mettl25(0.07), Smyd5(0.07), Mettl2(0.06), Trmt10b(0.06), Mettl13(0.06), Fbl(0.05), Trmt2a(0.05), Setd6(0.05), Wbscr22(0.05), Mettl23(0.04), Ece2(0.04), Nop2(0.04), Tfb2m(0.03), Prmt5(0…
P-methyltransferase activity	0.0541603	0.176812	0.0088791	0.0366989	73	0.00017031	0.651832	0.489327	0.0753348	0.259481	Setd4(0.52), Prdm1(0.43), Mettl6(0.37), Trmt10a(0.28), Prdm4(0.24), Bmt2(0.21), Mettl22(0.15), Mepce(0.14), Mrm1(0.12), Mettl18(0.11), Trmt10c(0.09), Emg1(0.08), Ftsj3(0.08), Smyd2(0.08), Trmt11(0.07), Nsun5(0.07), Mettl25(0.07), Smyd5(0.07), Mettl2(0.06), Trmt10b(0.06), Mettl13(0.06), Fbl(0.05), Trmt2a(0.05), Setd6(0.05), Wbscr22(0.05), Mettl23(0.04), Ece2(0.04), Nop2(0.04), Tfb2m(0.03), Prmt5(0…
Se-methyltransferase activity	0.0541603	0.176812	0.0088791	0.0366989	73	0.00017031	0.651832	0.489327	0.0753348	0.259481	Setd4(0.52), Prdm1(0.43), Mettl6(0.37), Trmt10a(0.28), Prdm4(0.24), Bmt2(0.21), Mettl22(0.15), Mepce(0.14), Mrm1(0.12), Mettl18(0.11), Trmt10c(0.09), Emg1(0.08), Ftsj3(0.08), Smyd2(0.08), Trmt11(0.07), Nsun5(0.07), Mettl25(0.07), Smyd5(0.07), Mettl2(0.06), Trmt10b(0.06), Mettl13(0.06), Fbl(0.05), Trmt2a(0.05), Setd6(0.05), Wbscr22(0.05), Mettl23(0.04), Ece2(0.04), Nop2(0.04), Tfb2m(0.03), Prmt5(0…
2-phytyl-1,4-naphthoquinone methyltransferase activity	0.0541603	0.176812	0.0088791	0.0366989	73	0.00017031	0.651832	0.489327	0.0753348	0.259481	Setd4(0.52), Prdm1(0.43), Mettl6(0.37), Trmt10a(0.28), Prdm4(0.24), Bmt2(0.21), Mettl22(0.15), Mepce(0.14), Mrm1(0.12), Mettl18(0.11), Trmt10c(0.09), Emg1(0.08), Ftsj3(0.08), Smyd2(0.08), Trmt11(0.07), Nsun5(0.07), Mettl25(0.07), Smyd5(0.07), Mettl2(0.06), Trmt10b(0.06), Mettl13(0.06), Fbl(0.05), Trmt2a(0.05), Setd6(0.05), Wbscr22(0.05), Mettl23(0.04), Ece2(0.04), Nop2(0.04), Tfb2m(0.03), Prmt5(0…
tRNA (uracil-2'-O-)-methyltransferase activity	0.0541603	0.176812	0.0088791	0.0366989	73	0.00017031	0.651832	0.489327	0.0753348	0.259481	Setd4(0.52), Prdm1(0.43), Mettl6(0.37), Trmt10a(0.28), Prdm4(0.24), Bmt2(0.21), Mettl22(0.15), Mepce(0.14), Mrm1(0.12), Mettl18(0.11), Trmt10c(0.09), Emg1(0.08), Ftsj3(0.08), Smyd2(0.08), Trmt11(0.07), Nsun5(0.07), Mettl25(0.07), Smyd5(0.07), Mettl2(0.06), Trmt10b(0.06), Mettl13(0.06), Fbl(0.05), Trmt2a(0.05), Setd6(0.05), Wbscr22(0.05), Mettl23(0.04), Ece2(0.04), Nop2(0.04), Tfb2m(0.03), Prmt5(0…
tRNA (cytosine-2'-O-)-methyltransferase activity	0.0541603	0.176812	0.0088791	0.0366989	73	0.00017031	0.651832	0.489327	0.0753348	0.259481	Setd4(0.52), Prdm1(0.43), Mettl6(0.37), Trmt10a(0.28), Prdm4(0.24), Bmt2(0.21), Mettl22(0.15), Mepce(0.14), Mrm1(0.12), Mettl18(0.11), Trmt10c(0.09), Emg1(0.08), Ftsj3(0.08), Smyd2(0.08), Trmt11(0.07), Nsun5(0.07), Mettl25(0.07), Smyd5(0.07), Mettl2(0.06), Trmt10b(0.06), Mettl13(0.06), Fbl(0.05), Trmt2a(0.05), Setd6(0.05), Wbscr22(0.05), Mettl23(0.04), Ece2(0.04), Nop2(0.04), Tfb2m(0.03), Prmt5(0…
phosphomethylethanolamine N-methyltransferase activity	0.0541603	0.176812	0.0088791	0.0366989	73	0.00017031	0.651832	0.489327	0.0753348	0.259481	Setd4(0.52), Prdm1(0.43), Mettl6(0.37), Trmt10a(0.28), Prdm4(0.24), Bmt2(0.21), Mettl22(0.15), Mepce(0.14), Mrm1(0.12), Mettl18(0.11), Trmt10c(0.09), Emg1(0.08), Ftsj3(0.08), Smyd2(0.08), Trmt11(0.07), Nsun5(0.07), Mettl25(0.07), Smyd5(0.07), Mettl2(0.06), Trmt10b(0.06), Mettl13(0.06), Fbl(0.05), Trmt2a(0.05), Setd6(0.05), Wbscr22(0.05), Mettl23(0.04), Ece2(0.04), Nop2(0.04), Tfb2m(0.03), Prmt5(0…
tRNA (cytosine-3-)-methyltransferase activity	0.0541603	0.176812	0.0088791	0.0366989	73	0.00017031	0.651832	0.489327	0.0753348	0.259481	Setd4(0.52), Prdm1(0.43), Mettl6(0.37), Trmt10a(0.28), Prdm4(0.24), Bmt2(0.21), Mettl22(0.15), Mepce(0.14), Mrm1(0.12), Mettl18(0.11), Trmt10c(0.09), Emg1(0.08), Ftsj3(0.08), Smyd2(0.08), Trmt11(0.07), Nsun5(0.07), Mettl25(0.07), Smyd5(0.07), Mettl2(0.06), Trmt10b(0.06), Mettl13(0.06), Fbl(0.05), Trmt2a(0.05), Setd6(0.05), Wbscr22(0.05), Mettl23(0.04), Ece2(0.04), Nop2(0.04), Tfb2m(0.03), Prmt5(0…
rRNA (cytosine-2'-O-)-methyltransferase activity	0.0541603	0.176812	0.0088791	0.0366989	73	0.00017031	0.651832	0.489327	0.0753348	0.259481	Setd4(0.52), Prdm1(0.43), Mettl6(0.37), Trmt10a(0.28), Prdm4(0.24), Bmt2(0.21), Mettl22(0.15), Mepce(0.14), Mrm1(0.12), Mettl18(0.11), Trmt10c(0.09), Emg1(0.08), Ftsj3(0.08), Smyd2(0.08), Trmt11(0.07), Nsun5(0.07), Mettl25(0.07), Smyd5(0.07), Mettl2(0.06), Trmt10b(0.06), Mettl13(0.06), Fbl(0.05), Trmt2a(0.05), Setd6(0.05), Wbscr22(0.05), Mettl23(0.04), Ece2(0.04), Nop2(0.04), Tfb2m(0.03), Prmt5(0…
rRNA (cytosine-N4-)-methyltransferase activity	0.0541603	0.176812	0.0088791	0.0366989	73	0.00017031	0.651832	0.489327	0.0753348	0.259481	Setd4(0.52), Prdm1(0.43), Mettl6(0.37), Trmt10a(0.28), Prdm4(0.24), Bmt2(0.21), Mettl22(0.15), Mepce(0.14), Mrm1(0.12), Mettl18(0.11), Trmt10c(0.09), Emg1(0.08), Ftsj3(0.08), Smyd2(0.08), Trmt11(0.07), Nsun5(0.07), Mettl25(0.07), Smyd5(0.07), Mettl2(0.06), Trmt10b(0.06), Mettl13(0.06), Fbl(0.05), Trmt2a(0.05), Setd6(0.05), Wbscr22(0.05), Mettl23(0.04), Ece2(0.04), Nop2(0.04), Tfb2m(0.03), Prmt5(0…
trihydroxyferuloyl spermidine O-methyltransferase activity	0.0541603	0.176812	0.0088791	0.0366989	73	0.00017031	0.651832	0.489327	0.0753348	0.259481	Setd4(0.52), Prdm1(0.43), Mettl6(0.37), Trmt10a(0.28), Prdm4(0.24), Bmt2(0.21), Mettl22(0.15), Mepce(0.14), Mrm1(0.12), Mettl18(0.11), Trmt10c(0.09), Emg1(0.08), Ftsj3(0.08), Smyd2(0.08), Trmt11(0.07), Nsun5(0.07), Mettl25(0.07), Smyd5(0.07), Mettl2(0.06), Trmt10b(0.06), Mettl13(0.06), Fbl(0.05), Trmt2a(0.05), Setd6(0.05), Wbscr22(0.05), Mettl23(0.04), Ece2(0.04), Nop2(0.04), Tfb2m(0.03), Prmt5(0…
regulation of sensory perception of pain	0.0893921	0.242302	0.00897964	0.0370711	22	0.57589	0.00278125	0.297108	0.0903988	0.200624	Fcgr4(0.92), Edn1(0.76), Adrb2(0.54), Acpp(0.45), Acpp(0.45), Rtn4(0.35), Tlr4(0.28), Ctss(0.27), Grin2d(0.13), Ednrb(0.06), Npff(0.05), Fgfr1(-0.03), Adora1(-0.08), Cck(-0.08), Slc9a1(-0.11), Ncam1(-0.13), F2r(-0.19), Comt(-0.23), Mgll(-0.26), Nos1(-0.56), Tmem100(-0.68), Kcnj10(-0.73),
superoxide-generating NADPH oxidase activity	0.0592436	0.373947	0.00899039	0.0370722	12	0.494885	0.00456779	0.490135	0.00155914	0.621626	Ncf1(0.48), Ncf1(0.48), Ncf1(0.48), Ncf1(0.48), Ncf2(0.44), Ncf2(0.44), Cyba(-0.01), Cyba(-0.01), Pax2(-0.1), Nox4(-0.23), Cybb(-0.39), Cybb(-0.39),
negative regulation of Notch signaling pathway	0.0900602	0.219924	0.00905895	0.0373115	29	0.289353	0.00419265	0.393577	0.0598384	0.394845	Chac1(0.76), Nrarp(0.5), Nrarp(0.5), Nrarp(0.5), Nfkbia(0.48), 1810011O10Rik(0.31), Mmp14(0.28), Egfl7(0.23), Notch4(0.2), Dll4(0.2), Hif1an(0.11), Slc35c1(0.09), Numb(0.05), Hey1(0.04), Dlk2(0.01), Dlk2(0.01), Hey2(0), Hey2(0), Pear1(-0.05), Bmp7(-0.09), Gata2(-0.13), Rita1(-0.16), Gdpd5(-0.17), Gdpd5(-0.17), Gdpd5(-0.17), Rfng(-0.18), Cbfa2t2(-0.22), Bcl6(-0.33), Neurl1a(-0.33),
rRNA (adenine-N6,N6-)-dimethyltransferase activity	0.0588643	0.176984	0.00907185	0.0373212	74	0.000269828	0.635658	0.473487	0.0775799	0.247725	Setd4(0.52), Prdm1(0.43), Mettl6(0.37), Trmt10a(0.28), Prdm4(0.24), Bmt2(0.21), Mettl22(0.15), Mepce(0.14), Mrm1(0.12), Mettl18(0.11), Trmt10c(0.09), Emg1(0.08), Ftsj3(0.08), Smyd2(0.08), Trmt11(0.07), Nsun5(0.07), Mettl25(0.07), Smyd5(0.07), Mettl2(0.06), Trmt10b(0.06), Mettl13(0.06), Fbl(0.05), Trmt2a(0.05), Setd6(0.05), Wbscr22(0.05), Mettl23(0.04), Ece2(0.04), Nop2(0.04), Tfb2m(0.03), Prmt5(0…
blood coagulation	0.0892869	0.16222	0.00909412	0.0373693	64	0.210173	0.00436818	0.517069	0.0403165	0.44085	Fgb(1.88), Fgg(1.46), F10(1.06), Fga(1.06), Procr(0.9), Thbd(0.9), Kng1(0.89), Apoh(0.77), F13a1(0.32), F13a1(0.32), Pdgfa(0.31), Pdgfb(0.25), P2ry12(0.2), Serpine2(0.17), F5(0.1), F5(0.1), F5(0.1), Ptprj(0.1), F2rl1(0.09), Lnpk1(0.09), Bloc1s3(0.08), Ano6(0.06), Anxa5(0.04), Pros1(0.04), F3(0.02), F3(0.02), Proc(0.02), Mmrn1(0.02), Mmrn1(0.02), Enpp4(0.02), F13b(-0.01), Hps6(-0.01), Nbeal2(-0.02…
response to tumor necrosis factor	0.103944	0.218591	0.00922336	0.0378409	21	0.277285	0.354692	0.265703	0.0301334	0.0358477	Cd14(1.38), Wfdc21(0.95), Gch1(0.83), Map2k7(0.2), Casp8(0.16), Jak2(0.16), Ripk1(0.09), Adam9(0.08), Igbp1(0.06), Trim32(0.06), Adam10(0.05), Ccl5(0.03), Cxcl16(0.01), Rps6kb1(0), Map4k3(-0.04), Ythdc2(-0.05), Tnfrsf11a(-0.1), Insr(-0.11), Endog(-0.25), Aff3(-0.43), Adipoq(-3.04),
nucleophagy	0.124701	0.278592	0.00923028	0.0378409	15	0.163927	0.238311	0.0941786	0.0940443	0.171862	Wipi1(0.33), Atg2a(0.21), Wipi2(0.2), Atg4b(0.17), Atg12(0.17), Wdr45b(0.16), Wdr45(0.13), Atg4a(0.12), Atg5(0.07), Atg4d(0.07), Becn1(0.03), Trappc8(-0.1), Atg3(-0.11), Atg4c(-0.11), Atg2b(-0.18),
maintenance of protein location in nucleus	0.134348	0.313844	0.0093043	0.0381002	10	0.0862282	0.208285	0.118779	0.1835	0.158139	Pml(0.13), Morc3(0.13), Taf8(0.12), Topors(0.08), Arl2bp(0.08), Taf3(0.07), Arl2(0.04), Bbs4(0.01), Supt7l(-0.06), Ciz1(-0.07),
histone H3-K4 trimethylation	0.0924115	0.300401	0.0094182	0.0385221	17	0.0889319	0.448104	0.0400723	0.10092	0.227236	Hist1h1c(0.27), Rtf1(0.12), Tet3(0.11), Bend3(0.06), Kmt2b(0.05), Arid4a(0.05), Ctr9(0.01), Ctr9(0.01), Ncoa6(0.01), Ncoa6(0.01), Zfp335(-0.04), Wdr61(-0.05), Ogt(-0.07), Kmt2a(-0.07), Kmt2a(-0.07), Tet2(-0.2), Tet2(-0.2),
actin filament organization	0.0625017	0.148621	0.00944891	0.038603	69	0.0568669	0.0255383	0.316389	0.00409867	0.919968	Emp2(0.37), Trf(0.37), Rnd1(0.36), Rac1(0.3), Actn1(0.3), Was(0.27), Dbn1(0.27), Akap2(0.23), Rac2(0.23), Actr3b(0.23), Abl2(0.22), Whamm(0.21), Casp4(0.2), Tmsb4x(0.19), Lmod1(0.19), Fscn1(0.18), Mad2l2(0.18), Cfl2(0.16), Tmod3(0.16), Srf(0.14), Actr3(0.14), Ppp1r9b(0.13), Cdc42(0.12), Diaph1(0.12), Cfl1(0.11), Arhgap17(0.11), Ptk2b(0.1), Arf1(0.08), Nck2(0.08), Sirpa(0.08), Ctnna1(0.07), Myo1b(…
positive regulation of RNA splicing	0.13246	0.254477	0.00952892	0.038885	15	0.0964626	0.077423	0.410007	0.0779657	0.191817	Srsf5(0.18), Smn1(0.17), Zpr1(0.17), Rbm22(0.15), Ern1(0.12), Setx(0.1), Polr2a(0.08), Srsf1(0.02), U2af2(0.01), Rbm20(-0.02), Rbm20(-0.02), Khdrbs3(-0.03), Hnrnpk(-0.04), Hnrnpll(-0.12), Pik3r1(-0.24),
integral component of endoplasmic reticulum membrane	0.101588	0.118382	0.00961866	0.039206	86	0.421785	0.134772	0.385194	0.0531796	0.0213657	Dhrs9(1.11), Dcstamp(0.79), Rtn4(0.35), Rtn4(0.35), Lrmp(0.31), Sgms2(0.31), Hspa5(0.3), Fam134b(0.28), Slc37a1(0.28), Tm7sf2(0.23), Rhbdd1(0.22), Rce1(0.21), Cln3(0.2), Dpm2(0.2), Fitm2(0.18), Saraf(0.17), Elovl6(0.16), Hacd1(0.14), Edem1(0.14), Ern1(0.12), Creb3l1(0.11), Rrbp1(0.11), Ubxn8(0.11), Acer3(0.1), Amfr(0.09), Samd8(0.09), Samd8(0.09), Gpat4(0.09), Slc35b1(0.09), Atf6(0.09), G6pc3(0.0…
DNA-directed RNA polymerase I complex	0.100806	0.285756	0.00967181	0.039374	15	0.0116338	0.234445	0.257536	0.0829683	0.420673	Polr1d(0.21), Polr2l(0.2), Polr2k(0.13), Polr2h(0.12), Polr1c(0.11), Twistnb(0.11), Polr2f(0.09), Cd3eap(0.08), Znrd1(0.04), Polr1a(0.01), Polr1a(0.01), Polr1b(-0.08), Polr1b(-0.08), Polr1e(-0.11), Polr2e(-0.12),
positive regulation of T cell mediated cytotoxicity	0.0828971	0.282082	0.00968213	0.039374	17	0.568848	0.0017038	0.181766	0.187292	0.249067	Pnp(0.35), Ptprc(0.24), H2-D1(0.17), P2rx7(0.16), H2-K1(0.12), H2-T23(0.12), H2-T23(0.12), H2-M3(0.06), H2-M3(0.06), B2m(0.04), Hspa8(0), Cd1d1(-0.02), Fadd(-0.03), Tap2(-0.09), Tap2(-0.09), Tap2(-0.09), Stx7(-0.13),
negative regulation of toll-like receptor signaling pathway	0.0896534	0.320744	0.00969991	0.0393819	12	0.560794	0.0561117	0.0292187	0.0379901	0.450189	Irak3(0.72), Tyro3(0.24), Arrb2(0.21), Nfkbil1(0.18), Nfkbil1(0.18), Cactin(0.18), Lgr4(0.03), Pdpk1(-0.02), Trim30a(-0.06), Nlrp6(-0.13), Smpdl3b(-0.24), Tlr9(-0.41),
SNARE binding	0.128355	0.131014	0.00970635	0.0393819	62	0.0777529	0.0791116	0.185335	0.212643	0.241057	Syt5(1.57), Stx1a(0.42), Stx1a(0.42), Unc13a(0.41), Syt11(0.38), Sec22b(0.31), Stx11(0.29), Stx3(0.21), Vamp4(0.18), Vamp3(0.17), Vamp3(0.17), Exoc3l(0.17), Stx12(0.13), Tnfaip2(0.11), Stx5a(0.11), Ykt6(0.11), Sec22c(0.11), Stx6(0.1), Stx2(0.09), Stx2(0.09), Vti1b(0.09), Vti1b(0.09), Gosr2(0.09), Stx4a(0.07), Stx4a(0.07), Sec22a(0.06), Stxbp1(0.05), Vamp2(0.05), Vamp2(0.05), Stx8(0.05), Stx8(0.05…
SAGA complex	0.129148	0.275655	0.00972199	0.0393827	13	0.0803967	0.215828	0.230022	0.133188	0.117714	Usp27x(0.22), Atxn7l3(0.19), Wdr75(0.16), Taf9(0.14), Tada3(0.12), Usp22(0.1), Usp22(0.1), Supt20(0.01), Eny2(-0.05), Eny2(-0.05), Usp34(-0.06), Taf9b(-0.13), Supt3(-0.27),
tRNA (adenine-N1-)-methyltransferase activity	0.0533304	0.17699	0.0097288	0.0393827	74	0.000142483	0.63555	0.47337	0.0941861	0.287508	Setd4(0.52), Prdm1(0.43), Mettl6(0.37), Trmt10a(0.28), Prdm4(0.24), Bmt2(0.21), Mettl22(0.15), Mepce(0.14), Mrm1(0.12), Mettl18(0.11), Trmt10c(0.09), Emg1(0.08), Ftsj3(0.08), Smyd2(0.08), Trmt11(0.07), Nsun5(0.07), Mettl25(0.07), Smyd5(0.07), Mettl2(0.06), Trmt10b(0.06), Mettl13(0.06), Fbl(0.05), Trmt2a(0.05), Setd6(0.05), Wbscr22(0.05), Mettl23(0.04), Ece2(0.04), Nop2(0.04), Tfb2m(0.03), Prmt5(0…
protein K63-linked deubiquitination	0.112655	0.214038	0.00977785	0.0395026	22	0.112769	0.465096	0.0978915	0.13649	0.0628513	Usp13(0.71), Otud1(0.26), Yod1(0.22), Atxn3(0.17), Tnfaip3(0.15), Tnfaip3(0.15), Psmd14(0.14), Otud7b(0.14), Otud7b(0.14), Zranb1(0.14), Usp25(0), Otub2(0), Otub2(0), Babam1(-0.02), Brcc3(-0.03), Cyld(-0.04), Fam175b(-0.05), Fam175b(-0.05), Usp33(-0.08), Usp8(-0.09), Shmt2(-0.24), Usp20(-0.29),
negative regulation of viral entry into host cell	0.0975904	0.258503	0.00992118	0.0400135	19	0.424033	0.0762623	0.052533	0.182153	0.144962	Ptx3(0.38), Ifitm2(0.16), Ifitm2(0.16), Trim11(0.12), Trim11(0.12), Trim26(0.09), Trim59(0.09), Ifitm1(0.08), Mid2(0.04), Trim25(0.03), Trim8(0.02), Mre11a(0), Snx3(-0.01), Ifitm3(-0.01), Ifitm3(-0.01), Nbn(-0.03), Trim56(-0.04), Rad50(-0.05), Gsn(-0.09),
microtubule-based process	0.12746	0.16886	0.00992987	0.0400135	34	0.148711	0.265827	0.279601	0.0200543	0.183089	Tuba8(0.69), Tuba1a(0.45), Tubb6(0.39), Tubb2a(0.32), Tuba1c(0.28), Map1b(0.22), Tubb5(0.17), Tubb5(0.17), Tuba4a(0.15), Tubb4b(0.14), Dctn2(0.13), Vbp1(0.12), Map3k11(0.12), Xrn2(0.1), Nek3(0.09), Pafah1b1(0.07), Tubb4a(0.07), Dctn3(0.05), Tubb2b(0.05), Tubg1(0.05), Dynll1(0.04), Dnal4(0.02), Kif5b(0.01), Tuba1b(0.01), Nek9(0), Lyst(-0.03), Kifap3(-0.05), Cryaa(-0.17), Dynll2(-0.18), Tube1(-0.23…
ER overload response	0.0906012	0.336469	0.00994143	0.0400145	12	0.0610327	0.0870168	0.170179	0.408859	0.131925	Hspa5(0.3), Ppp1r15b(0.11), Ppp1r15b(0.11), Trp53(0.08), Gsk3b(0.08), Gsk3b(0.08), Ddit3(0.05), Ddit3(0.05), Vimp(0), Ccdc47(-0.02), Eif2ak3(-0.04), Tmco1(-0.11),
filamentous actin	0.0941159	0.20638	0.0101804	0.0409299	29	0.109061	0.0467515	0.317548	0.0313373	0.523104	Crmp1(0.47), Tpm4(0.37), Tpm3(0.28), Tmsb10(0.21), Fermt2(0.21), Tmsb4x(0.19), Fscn1(0.18), Tmod3(0.16), Specc1(0.16), Flna(0.08), Flna(0.08), Cd2ap(0.07), Specc1l(0.06), Shroom2(0.06), Pkd2(0.05), Rac3(0.05), Carmil1(0.02), Tpm1(-0.03), Iqgap2(-0.03), Myo1c(-0.04), Fermt1(-0.08), Dpysl3(-0.1), Shroom4(-0.17), Prkcz(-0.18), Map3k1(-0.18), Espn(-0.24), Myo6(-0.25), Actg1(-0.27), Myo1f(-0.34),
single-stranded DNA binding	0.085231	0.135019	0.0104008	0.0417687	83	0.064625	0.48842	0.132122	0.0674614	0.155928	Ercc1(0.62), Ercc1(0.62), Jchain(0.38), Mcm10(0.3), Alyref2(0.27), Nol12(0.25), Cry2(0.24), Ybx3(0.21), Ybx3(0.21), Anxa1(0.2), Xrcc2(0.19), Smug1(0.18), Ybx1(0.15), Ybx1(0.15), Polr2d(0.15), Rnf138(0.14), Xrcc3(0.14), Rtf1(0.12), Cdc45(0.11), Purb(0.11), Purb(0.11), Rpa2(0.11), Ptbp1(0.1), Alyref(0.09), Swsap1(0.09), Cnbp(0.08), Pcbp1(0.08), Pcbp1(0.08), Ctc1(0.07), Nup35(0.07), Obfc1(0.07), Ncl…
tRNA (guanine-N1-)-methyltransferase activity	0.0598962	0.173924	0.0104398	0.0418776	74	0.000270324	0.678821	0.47337	0.0775776	0.247637	Setd4(0.52), Prdm1(0.43), Mettl6(0.37), Trmt10a(0.28), Prdm4(0.24), Bmt2(0.21), Mettl22(0.15), Mepce(0.14), Mrm1(0.12), Mettl18(0.11), Trmt10c(0.09), Emg1(0.08), Ftsj3(0.08), Smyd2(0.08), Trmt11(0.07), Nsun5(0.07), Mettl25(0.07), Smyd5(0.07), Mettl2(0.06), Trmt10b(0.06), Mettl13(0.06), Fbl(0.05), Trmt2a(0.05), Setd6(0.05), Wbscr22(0.05), Mettl23(0.04), Ece2(0.04), Nop2(0.04), Tfb2m(0.03), Prmt5(0…
mRNA cleavage	0.123106	0.313573	0.0104802	0.041992	10	0.0877054	0.306664	0.190964	0.0704796	0.169669	Clp1(0.3), Wdr33(0.16), Pop4(0.15), Ern1(0.12), Pcf11(0.11), Cstf3(0.09), Cpsf2(0.08), Cpsf1(-0.03), Nudt21(-0.11), Mir196a-1(-0.27),
Sin3 complex	0.115493	0.251949	0.0105015	0.0420299	16	0.0425974	0.549272	0.188655	0.0205551	0.261764	Sap30(0.28), Sin3b(0.19), Ing2(0.17), Fam60a(0.13), Fam60a(0.13), Hdac1(0.07), Hdac2(0.05), Sin3a(0.05), Sin3a(0.05), Morf4l1(0.05), Hey2(0), Csnk2a1(-0.02), Phf12(-0.04), Suds3(-0.06), Ncor1(-0.15), Ncor1(-0.15),
cholesterol transporter activity	0.0926474	0.324919	0.0105543	0.0421932	15	0.642222	0.241688	0.169241	0.0079991	0.0729937	Apoa1(0.51), Apoa1(0.51), Star(0.28), Abcg1(0.15), Abcg1(0.15), Apob(0.11), Apoe(-0.01), Apoa2(-0.06), Apoa2(-0.06), Abca1(-0.11), Abca1(-0.11), Abca1(-0.11), Scp2(-0.2), Apoa4(-0.33), Apoa4(-0.33),
tRNA (uracil) methyltransferase activity	0.0548431	0.176473	0.0106303	0.0424492	75	0.000163959	0.669722	0.456876	0.0826155	0.308061	Setd4(0.52), Prdm1(0.43), Mettl6(0.37), Trmt10a(0.28), Prdm4(0.24), Bmt2(0.21), Mettl22(0.15), Mepce(0.14), Mrm1(0.12), Mettl18(0.11), Trmt10c(0.09), Emg1(0.08), Ftsj3(0.08), Smyd2(0.08), Trmt11(0.07), Nsun5(0.07), Mettl25(0.07), Smyd5(0.07), Mettl2(0.06), Trmt10b(0.06), Mettl13(0.06), Fbl(0.05), Trmt2a(0.05), Setd6(0.05), Wbscr22(0.05), Mettl23(0.04), Ece2(0.04), Nop2(0.04), Tfb2m(0.03), Prmt5(0…
positive regulation of reactive oxygen species metabolic process	0.0976339	0.196161	0.0106534	0.0424936	29	0.191742	0.124417	0.194011	0.207651	0.0740798	Acod1(1.34), Cdkn1a(0.54), Thbs1(0.36), Ager(0.28), Xdh(0.27), Pdgfb(0.25), Zc3h12a(0.21), Zc3h12a(0.21), Grb2(0.19), Gadd45a(0.18), Ripk3(0.14), Ptk2b(0.1), Nfe2l2(0.09), Rnf41(0.09), Trp53(0.08), Tspo(0.04), Tspo(0.04), Romo1(0.02), Eif5a(0.02), Tgfbr2(0.01), Cd36(-0.02), Plau(-0.09), Akr1c18(-0.1), Cyp1b1(-0.11), Mapk14(-0.17), Pid1(-0.2), Nox4(-0.23), Nqo2(-0.24), Pdgfrb(-0.34),
nucleosome disassembly	0.129819	0.294559	0.0106785	0.0425456	13	0.0500171	0.353774	0.195167	0.0832715	0.188263	Cebpg(0.32), Hist3h2a(0.27), Smarcd2(0.07), Smarcd1(0.05), Smarcc1(0.03), Arid2(0.03), Smarce1(0.02), Smarcb1(-0.01), Smarcb1(-0.01), Smarcc2(-0.01), Smarca4(-0.02), Arid1a(-0.03), Smarcd3(-0.08),
chromosome, centromeric region	0.0106527	0.152178	0.0107616	0.0427841	119	0.0927358	0.305682	0.0968384	0.21433	0.111896	Rassf2(0.42), Zwint(0.31), Mis18a(0.3), Cenpu(0.3), Cenpl(0.28), Nek2(0.26), Ppp2cb(0.26), Meaf6(0.26), Cenpt(0.24), Sycp3(0.23), Zfp330(0.23), Nde1(0.22), Bub1b(0.21), Mis12(0.2), Daxx(0.18), Incenp(0.17), Incenp(0.17), Incenp(0.17), Rangap1(0.17), Mad2l1(0.17), Fbxo28(0.17), Anapc16(0.15), Cenpq(0.15), Sept7(0.15), Dapk3(0.14), Lrwd1(0.14), Ahctf1(0.14), Sept2(0.13), Suv39h1(0.13), Pinx1(0.13),…
mRNA 3'-UTR AU-rich region binding	0.0668414	0.326033	0.0107657	0.0427841	13	0.402226	0.0143311	0.146626	0.173674	0.237852	Zfp36(0.41), Zfp36(0.41), Cpeb1(0.34), Zfp36l1(0.31), Zfp36l1(0.31), Zc3h12a(0.21), Elavl1(0.13), Hnrnpd(0.02), Cpeb2(0.02), Zfp36l2(0), Zfp36l2(0), Cpsf1(-0.03), Cpeb3(-0.65),
ERAD pathway	0.127573	0.300271	0.0107746	0.0427841	14	0.126674	0.386809	0.0295332	0.314124	0.0905816	Rhbdd1(0.22), Vcp(0.17), Syvn1(0.08), Syvn1(0.08), Trim25(0.03), Derl1(0.02), Tmem129(0.02), Rnf5(-0.03), Stub1(-0.03), Sel1l(-0.06), Sel1l(-0.06), Rnf139(-0.06), Rnf185(-0.08), Rnf185(-0.08),
protein autoubiquitination	0.103901	0.158372	0.0108023	0.042823	51	0.207906	0.471658	0.00839934	0.342719	0.072716	Ube2t(0.74), Asb4(0.49), Rad18(0.47), Rnf4(0.21), Bfar(0.2), Rnf11(0.17), Ube2d3(0.16), Uhrf2(0.15), Uhrf2(0.15), Ube2b(0.13), Rnf141(0.13), Rnf141(0.13), March5(0.1), Amfr(0.09), Rnf41(0.09), Rnf220(0.08), Wwp2(0.08), Ercc8(0.08), Ube2a(0.07), Cnot4(0.07), Lrsam1(0.06), Rnf10(0.03), Rnf115(0.03), Ube2d2a(0.02), Ube4b(0.02), Trim68(0.01), Traf2(-0.01), Hectd1(-0.02), Stub1(-0.03), Trim13(-0.03), …
magnesium ion binding	0.115806	0.0828357	0.0108086	0.042823	172	0.128102	0.484148	0.165091	0.0502744	0.0892801	Irak3(0.72), Irak3(0.72), Sphk1(0.66), Glul(0.58), Map3k6(0.38), Map3k8(0.34), Gem(0.31), Nudt18(0.3), Brsk1(0.3), Gclc(0.28), Mthfd2(0.25), Sik1(0.24), Abl2(0.22), Abl2(0.22), Atp10a(0.22), Hprt(0.22), Hprt(0.22), Pgm1(0.22), Cerk(0.22), Mast4(0.22), Prps1(0.21), Oxsr1(0.21), Sik2(0.21), Sik2(0.21), Map2k7(0.2), Map2k7(0.2), Pdp1(0.2), Stk3(0.19), Mast1(0.18), Nt5c1a(0.18), Ppm1a(0.17), Inpp1(0.…
positive regulation of lipopolysaccharide-mediated signaling pathway	0.0707608	0.37244	0.0109255	0.0432377	11	0.273698	0.421295	0.0933517	0.00181403	0.461073	Ly86(0.21), Ly86(0.21), Ly86(0.21), Ly96(0.2), Ly96(0.2), Ly96(0.2), Bmp6(0.14), Mif(0.12), Traf6(-0.04), Prkca(-0.14), Sash1(-0.23),
negative regulation of epidermal growth factor receptor signaling pathway	0.123542	0.261952	0.0109673	0.0433546	15	0.328281	0.23122	0.0433709	0.0936834	0.18057	Ptpn2(0.3), Errfi1(0.27), Errfi1(0.27), Socs5(0.25), Tfap2a(0.18), Socs4(0.13), Ptprj(0.1), Rnf126(0.09), Cblc(0.04), Rnf115(0.03), Rnf115(0.03), Cbl(0.02), Dab2ip(-0.01), Ptprf(-0.2), Itga1(-0.36),
large ribosomal subunit	0.140692	0.273408	0.010999	0.0434156	13	0.0736348	0.142951	0.211984	0.167379	0.200182	Rpl17(0.33), Rbm3(0.2), Rpl8(0.11), Rpl10a(0.1), Rpl13a(0.1), Npm1(0.09), Mrpl32(0.08), Rpl27a(0.07), Rpl4(0.07), Mrpl15(-0.05), Mrpl1(-0.07), Mrpl22(-0.08), Mrpl2(-0.13),
chaperone binding	0.114519	0.113048	0.0110073	0.0434156	76	0.17993	0.228885	0.213514	0.404816	0.00760136	Fgb(1.88), Usp13(0.71), Dnajb1(0.58), Dnaja4(0.57), Hspe1(0.43), Hspe1(0.43), Bag3(0.41), Alb(0.34), Ctsc(0.34), Tsacc(0.33), Tsacc(0.33), Sdf2l1(0.31), Dnajb2(0.29), Hspd1(0.28), Cp(0.26), Dnajb5(0.24), Ahsa2(0.22), Grpel2(0.18), Dnajb6(0.15), Sod1(0.14), Ubl4a(0.14), Cdkn1b(0.13), Get4(0.13), Dnaja1(0.11), Amfr(0.09), Wrap53(0.09), Ahsa1(0.09), Stip1(0.08), Trp53(0.08), Dnlz(0.08), Syvn1(0.08),…
regulation of proteolysis	0.106493	0.236519	0.0110507	0.0435381	20	0.110357	0.321373	0.0400175	0.0671333	0.428165	Plaur(0.39), Gsap(0.34), Abtb1(0.26), Traf3(0.25), Traf3(0.25), Traf3(0.25), Abtb2(0.22), Btbd9(0.19), Spop(0.1), Btbd11(0.1), Btbd6(0.05), Klhl11(0.01), Btbd1(-0.01), Parl(-0.02), Btbd3(-0.04), Spopl(-0.08), Btbd2(-0.12), C2cd3(-0.12), Ltbp4(-0.15), Kbtbd4(-0.23),
monocyte chemotaxis	0.0261068	0.320885	0.0111108	0.0437264	18	0.0855933	9.95797e-06	0.952171	0.0400693	0.727388	Ccl20(0.91), Ccl22(0.73), Ccl6(0.68), Myo9b(0.26), Pdgfb(0.25), Anxa1(0.2), Flt1(0.19), Lgals3(0.14), Ccr2(0.12), Ccl9(0.1), Rps19(0.06), Ccl25(0.04), Ccl21a(0.03), Ccl11(-0.23), Ptpro(-0.3), Cx3cl1(-0.32), Ccl7(-0.39), Ccl4(-0.87),
blastocyst development	0.136891	0.211049	0.0111287	0.0437481	22	0.204091	0.2233	0.169304	0.174178	0.0516947	Eomes(0.57), Tgfbr1(0.27), Nek2(0.26), Elf3(0.23), Cdk11b(0.11), Med21(0.11), Emg1(0.08), Psmc4(0.08), Capn2(0.07), Nasp(0.07), Bnip2(0.06), G2e3(0.06), Psmc3(0.05), Dad1(0.03), Xab2(0), Smarcb1(-0.01), Thoc2(-0.02), Tgfbr3(-0.03), Thoc5(-0.04), N4bp2l2(-0.05), Hnf1a(-0.18), Atp1b1(-0.43),
nucleosome binding	0.130536	0.267531	0.0111533	0.0437961	14	0.10018	0.0925821	0.0893999	0.130259	0.486248	Rnf4(0.21), Dnttip1(0.17), Dnttip1(0.17), Smarca5(0.15), Noc2l(0.11), Znhit1(0.05), Supt6(0.03), Hp1bp3(0.02), Mum1(0.01), Rnf168(0.01), Rnf169(0.01), Arid1a(-0.03), Cabin1(-0.09), Smarca1(-0.3),
RNA polymerase III activity	0.129847	0.2322	0.0112081	0.0439054	18	0.0290156	0.264207	0.171956	0.145304	0.282195	Crcp(0.23), Polr1d(0.21), Polr2l(0.2), Polr3d(0.15), Polr2k(0.13), Polr2h(0.12), Polr1c(0.11), Polr3g(0.09), Polr2f(0.09), Polr3b(0.09), Polr3e(0.08), Polr3h(0.07), Polr3gl(0.02), Polr3f(-0.02), Polr3a(-0.03), Polr3c(-0.07), Polr2e(-0.12), Polr3k(-0.13),
cytoplasmic dynein complex	0.12592	0.242845	0.0112158	0.0439054	20	0.0831851	0.480934	0.210092	0.0872754	0.0656113	Dync1li2(0.12), Dync1i2(0.11), Bcl2l11(0.07), Dctn4(0.06), Dctn4(0.06), Snx4(0.06), Dynlt3(0.05), Dynll1(0.04), Dynll1(0.04), Dynll1(0.04), Dynlt1b(0.02), Dctn1(-0.01), Dynlrb1(-0.02), Dync1h1(-0.04), Dync1h1(-0.04), Dync1li1(-0.05), Dync1li1(-0.05), Tpr(-0.06), Wdr34(-0.17), Dync2h1(-0.25),
osteoblast differentiation	0.139637	0.0996168	0.0112183	0.0439054	96	0.157107	0.04591	0.201797	0.239745	0.192132	Wnt11(0.8), Nog(0.78), Igfbp3(0.67), Spp1(0.53), Spp1(0.53), Junb(0.48), Sema7a(0.47), Bmp8a(0.44), Epha2(0.43), Hspe1(0.43), Tmem119(0.43), Tmem119(0.43), Tnc(0.41), Cyr61(0.4), Smad3(0.35), Rras2(0.24), Gja1(0.23), Cbfb(0.22), H3f3b(0.21), Fhl2(0.18), Hira(0.18), Gabbr1(0.18), Wwtr1(0.17), Wwtr1(0.17), Gtpbp4(0.16), Igf2(0.15), Rsl1d1(0.15), Bmp6(0.14), Ddx21(0.14), Mef2d(0.12), Akt1(0.11), Bmp…
hyaluronic acid binding	0.0345885	0.362433	0.0112412	0.0439461	17	0.0509374	0.0105843	0.777267	0.000169204	0.951422	Lyve1(0.75), Impg2(0.73), Tnfaip6(0.57), Cd44(0.33), Cd44(0.33), Cd44(0.33), Layn(0.15), Stab1(0.14), Vcan(-0.01), Hyal2(-0.11), Hyal2(-0.11), C1qbp(-0.13), Habp4(-0.21), Cemip(-0.22), Cemip(-0.22), Stab2(-1.06), Hmmr(-1.27),
repressing transcription factor binding	0.134914	0.171017	0.0113632	0.0443312	33	0.380239	0.0498725	0.0783676	0.132023	0.270994	Rela(0.36), Zfp703(0.29), Runx1(0.28), Arntl(0.23), Tle4(0.19), Myc(0.18), Nfyb(0.18), Kat5(0.17), Eif4e(0.14), Noc2l(0.11), Noc2l(0.11), Hhex(0.1), Skil(0.08), Ctbp1(0.07), Hdac7(0.07), Hdac1(0.07), Hdac5(0.06), Hdac4(0.06), Ddx20(0.03), Sri(0.03), Tcf3(0.02), Tbp(0.01), Park7(0.01), Runx2(0), Prdm5(0), Ski(-0.01), Ski(-0.01), Ctnnb1(-0.03), Cbx5(-0.1), Gmnn(-0.38), Hnf4a(-0.39), Hdac9(-0.83), H…
O-methyltransferase activity	0.0551853	0.176865	0.0113693	0.0443312	75	0.000154502	0.733916	0.501053	0.0677018	0.267664	Setd4(0.52), Prdm1(0.43), Mettl6(0.37), Trmt10a(0.28), Prdm4(0.24), Bmt2(0.21), Mettl22(0.15), Mepce(0.14), Mrm1(0.12), Mettl18(0.11), Trmt10c(0.09), Emg1(0.08), Ftsj3(0.08), Smyd2(0.08), Trmt11(0.07), Nsun5(0.07), Mettl25(0.07), Smyd5(0.07), Mettl2(0.06), Trmt10b(0.06), Mettl13(0.06), Fbl(0.05), Trmt2a(0.05), Setd6(0.05), Wbscr22(0.05), Mettl23(0.04), Ece2(0.04), Nop2(0.04), Tfb2m(0.03), Prmt5(0…
methylarsonite methyltransferase activity	0.05819	0.176362	0.0113772	0.0443312	74	0.000195806	0.678821	0.536672	0.0775776	0.247637	Setd4(0.52), Prdm1(0.43), Mettl6(0.37), Trmt10a(0.28), Prdm4(0.24), Bmt2(0.21), Mettl22(0.15), Mepce(0.14), Mrm1(0.12), Mettl18(0.11), Trmt10c(0.09), Emg1(0.08), Ftsj3(0.08), Smyd2(0.08), Trmt11(0.07), Nsun5(0.07), Mettl25(0.07), Smyd5(0.07), Mettl2(0.06), Trmt10b(0.06), Mettl13(0.06), Fbl(0.05), Trmt2a(0.05), Setd6(0.05), Wbscr22(0.05), Mettl23(0.04), Ece2(0.04), Nop2(0.04), Tfb2m(0.03), Prmt5(0…
histone H2A monoubiquitination	0.113785	0.30035	0.0114597	0.0446034	13	0.101374	0.735827	0.06255	0.0484408	0.105751	Pcgf1(0.39), Rybp(0.19), Rnf2(0.14), Kdm2b(0.09), Ddb1(0.01), Rnf168(0.01), Cul4b(0.01), Ring1(-0.01), Bcor(-0.02), Trim37(-0.03), Trim37(-0.03), Skp1a(-0.06), Ddb2(-0.16),
[truncated: 1,060 more rows]
