# Supplementary material for: CXCL12 and MYC control energy metabolism to support adaptive responses after kidney injury
Source: Nat Commun. 2018 Sep 10;9:3660. doi: 10.1038/s41467-018-06094-4 (PMC6131511; doi:10.1038/s41467-018-06094-4)
Supplement: Supplementary file 5 — Supplementary Data 2 [file 41467_2018_6094_MOESM5_ESM.xlsx]

## Sheet: Down
Supplementary Data 2. Down-regulated gene ontology (GO) enrichment terms, comparing Cxcl12 KO and control mice.	p.geomean	stat.mean	p.val	q.val	set.size	17205.ReadsPerGene.out	17207.ReadsPerGene.out	17209.ReadsPerGene.out	17215.ReadsPerGene.out	17217.ReadsPerGene.out	Genes
mitochondrial inner membrane	1.99567e-15	0.204496	2.42596e-57	8.58304e-54	385	8.9676e-21	4.57513e-15	3.14095e-12	1.6825e-17	0.000556861	Alas2(1.21), Pdk4(0.64), Fgr(0.54), Slc25a22(0.53), Slc25a33(0.45), Coq10b(0.33), Slc25a29(0.3), Ccdc109b(0.29), Bcl2l1(0.28), Hspd1(0.28), Hspd1(0.28), Src(0.22), ND2(0.21), Ldhd(0.2), Mgst1(0.2), Mthfd2l(0.2), Ucp3(0.19), Tmem11(0.19), Grpel2(0.18), Psen1(0.18), Dnajc19(0.18), Cds2(0.18), Slc25a38(0.15), Slc25a24(0.15), Lgals3(0.14), Slc25a14(0.14), Atp5l(0.14), Pisd(0.14), Hccs(0.13), CYTB(0.1…
proteinaceous extracellular matrix	5.29836e-12	0.240251	4.77577e-44	8.44833e-41	207	1.33746e-09	0.000222947	1.00008e-10	2.46092e-11	3.3708e-18	Mmp8(1.67), Mmp9(1.42), Mmp7(1.09), Mmp3(0.93), Mmp10(0.91), Emilin2(0.84), Wnt11(0.8), Thbs4(0.74), Impg2(0.73), Nyx(0.63), Ctgf(0.55), Il1rl1(0.52), Col6a6(0.52), Col11a2(0.45), Angptl4(0.42), Adamts4(0.42), Tnc(0.41), Cyr61(0.4), Adamts1(0.34), Lox(0.32), Lox(0.32), Adamts9(0.32), Mmp19(0.28), Lamc2(0.27), Tgfb1(0.26), Mmp11(0.23), Mmp11(0.23), Wnt7a(0.22), Adamtsl4(0.22), Olfml2b(0.22), Timp1…
ion transport	2.57468e-08	0.14879	5.93036e-32	6.99387e-29	381	5.17026e-09	3.83392e-06	6.85528e-08	2.96807e-12	6.50995e-05	Chrnb4(0.95), Lcn2(0.84), Slc17a4(0.83), Slc10a6(0.8), Trpv2(0.62), Slc12a5(0.61), Trpm6(0.59), Slc38a2(0.53), Cacna1a(0.49), Kcna7(0.49), Slco1a1(0.44), Kcne4(0.43), Slc39a14(0.43), Slc9a4(0.41), Clic1(0.41), Tmc8(0.4), Hfe(0.39), Trf(0.37), Kcns3(0.37), Slc39a10(0.34), Ttyh1(0.33), Clic4(0.32), Chrnb1(0.31), Best1(0.31), Kcnq4(0.31), Slc6a15(0.31), Kcnj8(0.29), Slc30a4(0.29), Ccdc109b(0.29), Sl…
transmembrane transport	2.7711e-08	0.180481	1.39374e-30	1.23276e-27	248	1.465e-08	1.28637e-07	4.60978e-07	2.52866e-12	0.00110474	Slc17a4(0.83), Trpv2(0.62), Slc12a5(0.61), Trpm6(0.59), Slc25a22(0.53), Slc16a3(0.51), Slc2a3(0.5), Cacna1a(0.49), Kcna7(0.49), Slc39a14(0.43), Slc43a1(0.42), Slc9a4(0.41), Abcb1b(0.39), Kcns3(0.37), Slc39a10(0.34), Kcnq4(0.31), Slc25a29(0.3), Slc30a4(0.29), Slc39a8(0.29), Slc37a1(0.28), Slc39a6(0.27), Slc2a1(0.25), Sfxn3(0.24), Slc22a7(0.24), Gja1(0.23), Slc12a4(0.22), Slc22a15(0.21), Mfsd10(0.1…
apical plasma membrane	5.52672e-08	0.165608	4.92737e-30	3.48661e-27	289	2.7746e-09	2.2753e-05	1.20879e-08	1.73192e-13	0.00520025	Hspa1a(1.78), Itgb3(0.82), Itgb3(0.82), Hsp90aa1(0.65), Trpm6(0.59), Adrb2(0.54), Adgrg2(0.48), Cldn4(0.46), Cd55(0.44), Kcne4(0.43), Fam65b(0.42), Hsp90ab1(0.4), Abcb1b(0.39), Emp2(0.37), Trf(0.37), Cd9(0.36), Cldnd1(0.34), Cd44(0.33), Marveld2(0.31), Il6ra(0.28), Prkab2(0.28), Tgfbr1(0.27), P2ry2(0.26), Grk2(0.26), Myrip(0.26), Il18(0.25), Msn(0.25), Msn(0.25), Slc2a1(0.25), Cacnb3(0.24), Dab2(…
metabolic process	2.31244e-09	0.14953	2.28555e-29	1.34771e-26	381	3.40651e-08	1.76514e-16	1.71876e-07	6.05935e-05	0.00570059	Chil3(1.73), Acod1(1.34), Acod1(1.34), Alas2(1.21), Pak3(0.85), Gch1(0.83), Sulf1(0.47), Uap1(0.43), Agpat4(0.42), Acsl6(0.41), Pnpla2(0.34), Acsl4(0.33), Hk3(0.33), Nat2(0.32), H6pd(0.32), Cdyl(0.31), Pde10a(0.31), Pign(0.29), Alas1(0.25), Mthfd2(0.25), Hk2(0.22), Neu3(0.21), Zc3h12a(0.21), Mthfd2l(0.2), Cdyl2(0.19), Pak2(0.19), Uckl1(0.18), Smug1(0.18), Hyal3(0.18), Tmem68(0.17), Sptlc2(0.16), …
sodium ion transport	6.60737e-07	0.270629	1.4041e-25	7.09674e-23	92	1.35871e-06	4.36381e-07	9.96267e-07	6.5631e-09	0.000735083	Slc17a4(0.83), Slc10a6(0.8), Slc38a2(0.53), Slc9a4(0.41), Slc6a15(0.31), Atp1b3(0.23), Slc38a1(0.16), Slc12a2(0.15), Slc9a8(0.14), Asic1(0.13), Slc8b1(0.13), Slc24a3(0.12), Slc20a1(0.11), Slc23a2(0.09), Slc4a8(0.08), Slc9a2(0.08), Scn5a(0.07), Scn5a(0.07), Slc20a2(0.07), Slc17a8(0.07), Slc17a1(0.06), Slc9a7(0.06), Slc5a2(0), Slc4a7(-0.01), Slc22a4(-0.02), Fxyd2(-0.04), Slc38a7(-0.05), Slc34a1(-0.…
transporter activity	1.37953e-06	0.218225	2.6191e-23	1.1583e-20	131	3.08883e-07	1.33882e-07	7.07527e-05	5.28218e-08	0.002306	Aqp9(1.02), Lcn2(0.84), Slc12a5(0.61), Slc2a3(0.5), Slco1a1(0.44), Abcb1b(0.39), Ttpal(0.35), Slc37a1(0.28), Slc2a1(0.25), Slc12a4(0.22), Slc11a1(0.21), Chp1(0.2), Slco4a1(0.2), Mfsd10(0.19), Tmem184b(0.19), Slc12a2(0.15), Slc25a38(0.15), Sec14l2(0.12), Nup88(0.11), Slc22a21(0.11), Abca4(0.09), Slc23a2(0.09), Slc4a8(0.08), Aqp2(0.06), Slco2a1(0.06), Abca7(0.05), Mfsd14a(0.04), Fabp4(0.03), Abcc1(…
mitochondrial respiratory chain complex I	1.4986e-06	0.35306	8.72634e-23	3.43042e-20	52	4.25101e-09	0.000251224	1.96365e-07	1.34312e-06	0.00247178	Ndufa1(0.12), Ndufb2(0.11), ND1(0.06), Ndufa2(0.06), Ndufa2(0.06), Ndufb11(0.04), Ndufs4(0.03), Ndufs4(0.03), Ndufa7(0.03), Ndufa7(0.03), Park7(0.01), Ndufb4(0.01), Ndufs6(0), Ndufs6(0), Ndufb5(-0.03), Ndufa3(-0.03), Ndufb9(-0.03), Ndufb9(-0.03), Ndufb3(-0.03), Ndufc1(-0.04), Ndufs2(-0.05), Ndufv1(-0.06), Ndufa9(-0.06), Ndufa9(-0.06), Ndufa6(-0.07), Ndufa12(-0.09), Ndufa10(-0.09), Ndufa5(-0.09), …
peroxisome	9.55909e-08	0.217567	1.30782e-22	4.62707e-20	150	2.84891e-06	1.74463e-14	0.000571535	2.48121e-07	0.0924644	Acsl6(0.41), Far2(0.39), Acsl4(0.33), Xdh(0.27), Acot5(0.26), Pmvk(0.15), Pmvk(0.15), Sod1(0.14), Vim(0.12), Slc22a21(0.11), Tmem173(0.1), Eci3(0.09), Pex13(0.08), Pex13(0.08), Acot8(0.07), Marf1(0.07), Prdx5(0.05), Pnpla8(0.05), Tmem35a(0.05), Atad1(0.05), Mul1(0.04), Urah(0.04), Nos2(0.03), Agps(0.03), Pex5(0.02), Pex11g(0.02), Dnm1l(0.02), Ehhadh(0.02), Ehhadh(0.02), Pex12(0.02), Pex16(0.01), …
glucose transmembrane transporter activity	1.7108e-05	0.499465	1.66361e-19	5.35076e-17	21	2.88948e-07	1.41887e-05	2.73642e-06	0.00030036	0.00206878	Slc2a3(0.5), Slc2a6(0.27), Slc2a1(0.25), Mfsd4a(-0.09), Mfsd4b3(-0.21), Slc2a13(-0.28), Slc2a8(-0.31), Slc2a9(-0.35), Mfsd4b1(-0.35), Mfsd4b5(-0.59), Mfsd4b5(-0.59), Slc2a12(-0.62), Slc2a4(-0.63), Slc2a4(-0.63), Slc2a4(-0.63), Slc2a10(-0.63), Slc2a10(-0.63), Slc5a1(-0.85), Slc2a5(-0.85), Slc2a2(-1.49), Slc2a2(-1.49),
water transport	8.3351e-06	0.457919	1.9573e-18	5.77078e-16	25	3.01172e-06	0.00114292	7.24759e-05	9.76309e-12	0.0922764	Aqp9(1.02), Aqp9(1.02), Aqp2(0.06), Aqp2(0.06), Aqp1(-0.21), Aqp1(-0.21), Aqp1(-0.21), Aqp1(-0.21), Aqp3(-0.27), Aqp3(-0.27), Aqp3(-0.27), Aqp3(-0.27), Cftr(-0.35), Aqp11(-0.52), Aqp7(-0.63), Aqp7(-0.63), Aqp4(-0.89), Aqp4(-0.89), Aqp4(-0.89), Slc14a1(-0.9), Slc14a1(-0.9), Aqp6(-0.96), Aqp8(-1.35), Aqp8(-1.35), Upk3a(-1.35),
basement membrane	5.64349e-06	0.237055	6.26389e-18	1.70474e-15	105	0.00143332	0.305589	8.30586e-08	2.26209e-06	3.23194e-09	Thbs4(0.74), Tnc(0.41), Trf(0.37), Vwa2(0.36), Adamts1(0.34), Alb(0.34), Runx1(0.28), Lamc2(0.27), Efna5(0.26), Itgb1(0.22), Timp1(0.21), Lamc1(0.19), Lamc1(0.19), Cd151(0.17), Rpsa(0.15), Serpinf1(0.13), Smoc2(0.13), Cask(0.09), Cask(0.09), Anxa2(0.08), Cfdp1(0.08), Col4a1(0.07), Vwa1(0.07), Loxl1(0.06), Vegfa(0.06), P3h1(0.06), Sparc(0.03), Cst3(0.02), Lama5(0.01), Lama5(0.01), Tgfb2(0), Smc3(-…
catalytic activity	1.78345e-06	0.117106	1.90626e-17	4.81738e-15	414	6.19343e-08	2.59021e-09	3.15983e-05	0.0136921	0.0682583	Sugct(2.73), Aloxe3(1.37), Alas2(1.21), Pak3(0.85), Gch1(0.83), Hdc(0.82), Glul(0.58), Ppm1j(0.58), Rimklb(0.55), Cdk5rap1(0.54), Moxd1(0.51), Sulf1(0.47), Fntb(0.41), Acsl6(0.41), Accs(0.39), Mthfd1l(0.38), Psat1(0.36), Pnp(0.35), Fh1(0.34), Adat3(0.34), Acsl4(0.33), Hk3(0.33), Taldo1(0.32), H6pd(0.32), Cdyl(0.31), Upp1(0.31), Pde10a(0.31), Impdh1(0.29), Pign(0.29), Got1(0.27), Xdh(0.27), Impdh2…
sarcolemma	1.15657e-05	0.21967	2.478e-17	5.84477e-15	107	1.18689e-07	0.0444816	2.11165e-09	1.64411e-05	0.0314763	Alox5(0.77), Adrb2(0.54), Nos3(0.53), Slc38a2(0.53), Trim72(0.48), Kcnj8(0.29), Itgb1(0.22), Itgb1(0.22), Anxa1(0.2), Pemt(0.19), Pld2(0.18), Cd59b(0.18), Flot1(0.15), Ctsb(0.14), Ptk2(0.14), Dysf(0.14), Dysf(0.14), Slc8b1(0.13), Ahnak(0.12), Ppp3r1(0.11), Vcl(0.11), Sgcb(0.09), Anxa2(0.08), Krt8(0.07), Krt8(0.07), Scn5a(0.07), Stx4a(0.07), Anxa5(0.04), Sync(0.04), Gnas(0.03), Plec(0.02), Plcb3(0…
calcium ion binding	1.41708e-05	0.124996	4.72235e-17	1.04423e-14	412	5.48181e-05	0.21778	7.38037e-08	5.58703e-05	7.24257e-07	Mmp8(1.67), S100a9(1.61), S100a8(1.6), Syt5(1.57), Celsr3(1.19), Cdk5r1(1.12), F10(1.06), Mmp3(0.93), Mmp10(0.91), Thbd(0.9), Gch1(0.83), Pcdh8(0.77), Thbs4(0.74), Mctp2(0.64), Tnnc1(0.54), Tnnc1(0.54), Mmp25(0.5), Cd93(0.48), Efhd2(0.48), Reps1(0.47), Sulf1(0.47), Cdh5(0.45), Adgrv1(0.44), Adgrv1(0.44), Nucb2(0.43), Hpcal4(0.43), Adam8(0.42), Epdr1(0.41), Clstn3(0.38), Prrg4(0.37), Thbs1(0.36), …
symporter activity	4.74077e-05	0.233142	7.98807e-17	1.66246e-14	85	0.000210429	1.85884e-07	0.00379477	2.47141e-06	0.00467832	Slc6a14(1.36), Mfsd2a(1.19), Slc17a4(0.83), Slc10a6(0.8), Slc12a5(0.61), Slc38a2(0.53), Slc25a22(0.53), Slc16a3(0.51), Slc6a15(0.31), Slc6a12(0.27), Slc6a17(0.25), Slc12a4(0.22), Slc10a3(0.21), Slc6a9(0.19), Slc38a1(0.16), Slc12a2(0.15), Slc24a3(0.12), Slc20a1(0.11), Slc23a2(0.09), Slc36a4(0.09), Slc16a1(0.07), Slc20a2(0.07), Slc17a8(0.07), Slc17a1(0.06), Slc1a4(0.04), Slc15a4(0.03), Slc22a18(0.0…
tricarboxylic acid cycle	2.70772e-05	0.4292	1.01021e-16	1.98563e-14	29	1.04911e-06	2.42531e-06	0.00016148	4.36002e-06	0.152755	Fh1(0.34), Fh1(0.34), Mdh2(0.01), Idh3g(-0.07), Sdhc(-0.08), Dlst(-0.08), Suclg2(-0.1), Sdhb(-0.1), Cs(-0.11), Pdha1(-0.11), Sucla2(-0.11), Idh3b(-0.11), Sdhd(-0.12), Sdhd(-0.12), Mdh1(-0.16), Sdha(-0.17), Ogdh(-0.19), Ogdh(-0.19), Dlat(-0.19), Aco2(-0.21), Aco1(-0.22), Suclg1(-0.22), Suclg1(-0.22), Idh2(-0.23), Idh1(-0.24), Pdhb(-0.25), Idh3a(-0.3), Ogdhl(-0.39), Dhtkd1(-0.64),
brush border membrane	4.60191e-05	0.247134	2.53515e-15	4.72072e-13	71	0.000434509	6.84323e-07	0.00674565	1.33638e-06	0.0148817	Slc6a14(1.36), Hsp90aa1(0.65), Trpm6(0.59), Cybrd1(0.56), Hsp90ab1(0.4), B4galt1(0.21), Pemt(0.19), Mfsd10(0.19), Pld2(0.18), Gna13(0.16), Gna13(0.16), Ace(0.14), Pik3cb(0.13), Slc27a4(0.12), Pcmt1(0.05), Slc26a4(0.01), Slc5a2(0), Cd36(-0.02), Cd36(-0.02), Slc6a19(-0.05), Atp8b1(-0.06), Gna12(-0.07), Gna12(-0.07), Slc34a1(-0.07), Cdhr5(-0.07), Tmem27(-0.08), Amn(-0.11), Pex19(-0.12), Ceacam1(-0.1…
oxidoreductase activity	9.28801e-07	0.110539	2.28648e-14	4.04479e-12	480	0.000475307	4.12463e-12	0.000951286	6.30335e-06	0.771209	Gpx6(2.94), Aloxe3(1.37), Rdh12(1.22), Akr1b7(1.2), Cyp2b10(1.19), Ptgs2(1.16), Dhrs9(1.11), Dio2(0.93), Alox5(0.77), Cyp27b1(0.73), Akr1c21(0.71), Akr1b8(0.66), Ero1lb(0.64), Hmox1(0.61), Bco1(0.6), Cybrd1(0.56), Nos3(0.53), Moxd1(0.51), Smox(0.51), Cyp3a13(0.49), Srxn1(0.42), Far2(0.39), Cyp4a12a(0.38), Hpd(0.37), Alkbh2(0.37), Blvrb(0.37), Aoc2(0.36), Ch25h(0.35), Plod2(0.35), Lox(0.32), H6pd(…
respiratory chain	8.42592e-05	0.30254	3.41229e-14	5.7489e-12	53	1.13974e-06	0.0121878	0.000131052	2.25567e-07	0.140826	ND2(0.21), ND4(0.21), CYTB(0.13), ND6(0.13), Ndufa1(0.12), Ndufb2(0.11), ND1(0.06), ND5(0.06), Ndufa2(0.06), COX1(0.05), Higd1a(0.05), Ndufa4(0.04), Ndufb11(0.04), Ndufs4(0.03), Ndufa7(0.03), Uqcrq(0.02), Ndufs6(0), Uqcr11(-0.01), Ndufb5(-0.03), Ndufa3(-0.03), Ndufb9(-0.03), Ndufb3(-0.03), Ndufc1(-0.04), Uqcr10(-0.05), Ndufs2(-0.05), Ndufv1(-0.06), Ndufa9(-0.06), Ndufa6(-0.07), Uqcrb(-0.07), Uqcr…
mitochondrial matrix	4.59769e-05	0.193286	8.19306e-14	1.31759e-11	112	0.00358077	6.52435e-09	0.00156461	8.86026e-05	0.0788294	Hspa1b(1.3), Alas2(1.21), Hspe1(0.43), Hspe1(0.43), Mterf1a(0.34), Alas1(0.25), Mthfsl(0.25), Mthfd2l(0.2), Glrx5(0.18), Mcl1(0.17), Atxn3(0.17), Iba57(0.15), Prdx1(0.14), Coasy(0.13), Mthfs(0.12), Glud1(0.1), Creb1(0.09), Rps3(0.09), Acsm3(0.08), Trp53(0.08), Pde2a(0.07), Acads(0.04), Tfb2m(0.03), Tfb2m(0.03), Clpp(0.03), Uqcc2(0.03), Etfbkmt(0.03), Mdh2(0.01), Park7(0.01), Fdps(0.01), Acadl(0),…
ion channel activity	0.000297235	0.228675	2.11857e-13	3.25891e-11	79	0.00087414	0.0852147	2.3196e-05	4.8906e-05	9.32453e-05	Chrnb4(0.95), Trpv2(0.62), Trpm6(0.59), Cacna1a(0.49), Kcna7(0.49), Kcns3(0.37), Chrnb1(0.31), Kcnq4(0.31), Fxyd5(0.28), Grin3b(0.28), Gabrb1(0.22), P2rx7(0.16), Trpc1(0.16), Tpcn2(0.16), Kcnc2(0.16), Asic1(0.13), Grin2d(0.13), Kcna1(0.11), Trpv6(0.11), Scn5a(0.07), Hvcn1(0.07), Gjc1(0.06), Itpr3(0.06), Kcnh2(0.06), Kcnh7(0.05), Grik5(0.01), Kcnd1(0), P2rx4(0), Clcn4(-0.02), Trpm4(-0.02), Kcnh1(-…
chloride transport	0.000431891	0.259881	3.00456e-13	4.42922e-11	55	0.00123878	0.0119579	0.000193497	2.26251e-06	0.00366712	Slc12a5(0.61), Slc12a5(0.61), Clic1(0.41), Ttyh1(0.33), Clic4(0.32), Best1(0.31), Gabrb1(0.22), Gabre(0.15), Slc12a2(0.15), Ano6(0.06), Ano6(0.06), Ano6(0.06), Tspo(0.04), Ano10(0.03), Ttyh3(-0.01), Clcn4(-0.02), Clcn2(-0.04), Clns1a(-0.05), Slc4a2(-0.05), Clcn7(-0.06), Clcnkb(-0.08), Clcc1(-0.09), Clcn3(-0.11), Ttyh2(-0.12), Pcyox1(-0.13), Ano8(-0.14), Fxyd1(-0.17), Clcn6(-0.28), Slc12a3(-0.3), …
regulation of ion transmembrane transport	0.000544207	0.231008	3.82992e-13	5.42011e-11	69	0.000993544	0.0150229	2.69208e-05	0.000241061	0.000606705	Cacna1a(0.49), Kcna7(0.49), Kcne4(0.43), Clic1(0.41), Kcns3(0.37), Clic4(0.32), Kcnq4(0.31), Kcnj8(0.29), Kcnj2(0.27), Cacnb3(0.24), Tpcn2(0.16), Kcnc2(0.16), Nedd4l(0.14), Kcna1(0.11), Cacna2d1(0.1), Kcnab1(0.1), Wwp2(0.08), Scn5a(0.07), Hvcn1(0.07), Kcnh2(0.06), Ano6(0.06), Kcnh7(0.05), Stom(0.04), Cacnb2(0.03), Cacng7(0.02), Kcnd1(0), Kcnh1(-0.03), Tmem109(-0.03), Clcn2(-0.04), Kcnip4(-0.05), …
T-tubule	0.000453197	0.253763	4.69592e-13	6.39006e-11	57	8.23755e-06	0.00870166	0.000109917	0.000256685	0.017481	Camk2d(0.42), Stac(0.4), Kcnj2(0.27), Bin1(0.26), Msn(0.25), Ezr(0.23), Prkar2a(0.15), Dysf(0.14), Dysf(0.14), Cacna2d1(0.1), Scn5a(0.07), Scn5a(0.07), Tgfb3(0.07), Sri(0.03), Ednra(0.02), Ppp3cb(0), Rtn2(0), Dlg1(-0.01), Cltc(-0.02), Igf1r(-0.05), Igf1r(-0.05), Cacna1c(-0.07), Cacna1c(-0.07), Cacna1c(-0.07), Rdx(-0.1), Nos1ap(-0.1), Slc9a1(-0.11), Cdh2(-0.12), Akap6(-0.17), Cacnb1(-0.23), Abcc9(…
potassium ion transport	0.000543709	0.219227	5.29752e-13	6.94171e-11	76	0.00203912	0.00592495	7.13227e-06	8.92051e-05	0.00713592	Slc12a5(0.61), Kcna7(0.49), Kcne4(0.43), Kcns3(0.37), Kcnq4(0.31), Kcnq4(0.31), Kcnj8(0.29), Kcnj2(0.27), Atp1b3(0.23), Slc12a4(0.22), Kcnc2(0.16), Slc12a2(0.15), Slc9a8(0.14), Cdkn1b(0.13), Cdk2(0.12), Slc24a3(0.12), Kcna1(0.11), Vps4b(0.11), Kcnab1(0.1), Kcnt1(0.09), Kcnh2(0.06), Slc9a7(0.06), Kcnh7(0.05), Kcnd1(0), Tsc1(0), Tsc1(0), Gja5(-0.01), Tmem38b(-0.01), Tmem38a(-0.01), Kcnh1(-0.03), Fx…
fatty acid metabolic process	3.85912e-05	0.181215	6.27464e-13	7.92846e-11	139	1.9687e-06	2.18302e-07	0.000271395	0.00104799	0.628409	Aloxe3(1.37), Ptgs2(1.16), Acsl6(0.41), Lpin3(0.4), Acsl4(0.33), Prkab2(0.28), Lpin2(0.25), Ucp3(0.19), Ptges3(0.19), Elovl6(0.16), Prkab1(0.15), Hacd1(0.14), Abhd5(0.14), Adipor1(0.14), Fa2h(0.13), Slc27a4(0.12), Ptges(0.12), Prkag1(0.11), Pla2g15(0.1), Lypla2(0.09), Acsbg1(0.09), Gpat4(0.09), Acsm3(0.08), Sgpl1(0.08), Degs1(0.06), Angptl3(0.06), Echdc2(0.06), Hacd3(0.06), Them4(0.06), Snca(0.05…
voltage-gated ion channel activity	0.000646889	0.229533	9.91259e-13	1.20934e-10	68	0.000926067	0.0248903	3.51312e-05	0.000193511	0.000864177	Cacna1a(0.49), Kcna7(0.49), Kcne4(0.43), Clic1(0.41), Kcns3(0.37), Clic4(0.32), Kcnq4(0.31), Kcnj8(0.29), Kcnj2(0.27), Cacnb3(0.24), Tpcn2(0.16), Kcnc2(0.16), Kcna1(0.11), Cacna2d1(0.1), Kcnab1(0.1), Scn5a(0.07), Hvcn1(0.07), Kcnh2(0.06), Ano6(0.06), Pkd2(0.05), Kcnh7(0.05), Cacnb2(0.03), Cacng7(0.02), Kcnd1(0), Trpm4(-0.02), Kcnh1(-0.03), Tmem109(-0.03), Clcn2(-0.04), Kcnip4(-0.05), Kcnj15(-0.06…
water channel activity	0.00036453	0.471377	1.76865e-12	2.08583e-10	17	0.000175955	0.0030121	0.000901198	3.46601e-07	0.125826	Aqp9(1.02), Aqp9(1.02), Aqp2(0.06), Aqp2(0.06), Aqp1(-0.21), Aqp1(-0.21), Aqp3(-0.27), Aqp3(-0.27), Aqp11(-0.52), Aqp11(-0.52), Aqp7(-0.63), Aqp7(-0.63), Aqp4(-0.89), Aqp4(-0.89), Aqp6(-0.96), Aqp8(-1.35), Aqp8(-1.35),
collagen trimer	0.000339073	0.274136	2.15923e-12	2.46431e-10	49	0.00807709	0.0433139	4.37499e-07	0.00509038	5.19222e-05	Emilin2(0.84), Col6a6(0.52), Col11a2(0.45), Col13a1(0.41), Lox(0.32), Col20a1(0.27), Col5a2(0.17), Wdr33(0.16), C1qtnf1(0.13), Ccbe1(0.09), Msr1(0.08), Col24a1(0.08), Col4a1(0.07), Scara3(0.06), C1qc(0.03), Eda(0.03), C1qb(-0.02), Col4a2(-0.03), Col18a1(-0.04), C1qa(-0.05), Col12a1(-0.07), Col7a1(-0.09), Col8a1(-0.09), C1qtnf3(-0.13), Col3a1(-0.18), C1qtnf7(-0.21), C1qtnf6(-0.28), Emilin1(-0.29),…
voltage-gated sodium channel activity	0.000686969	0.517868	2.27171e-12	2.51166e-10	13	0.00394701	0.00313691	0.000150407	0.000181544	0.00185474	Scn5a(0.07), Scn5a(0.07), Pkd2(0.05), Hcn2(-0.11), Hcn3(-0.21), Asic2(-0.3), Scn1b(-0.33), Scn7a(-0.64), Catsper4(-0.68), Scn4b(-1.08), Scn4b(-1.08), Scn4b(-1.08), Scn2b(-1.67),
lyase activity	0.00030012	0.174761	3.43366e-12	3.6813e-10	117	0.000299833	1.04829e-05	6.9445e-06	0.0248752	0.0890756	Aloxe3(1.37), Acod1(1.34), Hdc(0.82), Glul(0.58), Car13(0.43), Fh1(0.34), Mocs1(0.26), Adcy1(0.23), Car5b(0.2), Hmgcll1(0.17), Car2(0.15), Hacd1(0.14), Pisd(0.14), Hccs(0.13), Kyat1(0.11), Ogg1(0.1), Rps3(0.09), Odc1(0.08), Sgpl1(0.08), Amd1(0.07), Polb(0.07), Echdc2(0.06), Hacd3(0.06), Adcy4(0.06), Glo1(0.06), Apex1(0.05), Pam(0.05), Eno2(0.04), Fech(0.04), Hacd2(0.03), Aplf(0.03), Ehhadh(0.02),…
mitochondrial small ribosomal subunit	0.000500548	0.293625	3.79611e-12	3.95019e-10	44	0.00267945	0.000550194	3.67187e-07	0.00149511	0.09024	Mrps18b(0.1), Mrps10(0.09), Mrps12(0.06), Mrps7(0.03), Mrps7(0.03), Mrps31(0.03), Mrps6(0.03), Mrps6(0.03), Dap3(0), Mrps17(-0.01), Mrps17(-0.01), Mrps17(-0.01), Mrps22(-0.02), Mrps22(-0.02), Mrps14(-0.02), Mrps14(-0.02), Mrps18a(-0.02), Mrps18a(-0.02), Mrps18a(-0.02), Mrps15(-0.05), Mrps15(-0.05), Mrps15(-0.05), Mrps23(-0.06), Mrps36(-0.06), Mrps11(-0.08), Mrps11(-0.08), Mrps11(-0.08), Mrps18c(-…
potassium ion import	0.000383523	0.396404	7.68001e-12	7.76339e-10	23	1.75045e-06	0.00569333	1.34554e-05	0.000168257	0.449125	Kcnj8(0.29), Kcnj8(0.29), Kcnj2(0.27), Kcnj2(0.27), Atp1b3(0.23), Kcnj15(-0.06), Atp1b2(-0.23), Abcc9(-0.23), Atp1a1(-0.29), Atp1a1(-0.29), Kcnj5(-0.39), Atp1b1(-0.43), Atp1b1(-0.43), Atp1a3(-0.46), Atp1a3(-0.46), Kcnj16(-0.47), Atp4a(-0.48), Kcnj10(-0.73), Kcnj10(-0.73), Kcnj12(-0.82), Kcnj1(-1.16), Atp1a2(-1.4), Atp1a2(-1.4),
microvillus	0.000853682	0.229165	8.66653e-12	8.51728e-10	64	0.00507096	0.00214443	0.000231879	0.00308553	0.000368653	Ctsl(0.43), Clic4(0.32), Pdgfa(0.31), Atp6v1b2(0.26), Tgfb1(0.26), Msn(0.25), Ezr(0.23), Ezr(0.23), Fscn1(0.18), Fscn1(0.18), Car2(0.15), Lyz2(0.15), Slc27a4(0.12), Myo1g(0.1), Ift20(0.07), Oxtr(0.04), Erbb2(0.03), Stard10(0.03), Cnp(0), Dlg1(-0.01), Iqgap2(-0.03), Kif13b(-0.04), Myo1c(-0.04), Bbs2(-0.06), Atp6v1e1(-0.09), Aoc3(-0.1), Rdx(-0.1), Rdx(-0.1), Hyal2(-0.11), Nedd4(-0.11), Vcam1(-0.15)…
brush border	0.000639022	0.203849	1.79156e-11	1.71312e-09	80	0.00196491	3.27399e-06	0.00958866	0.00504094	0.00626429	Ralgds(0.58), Slc38a2(0.53), Actn1(0.3), Soat2(0.26), Ezr(0.23), Rgs19(0.18), Flii(0.17), Flnb(0.17), Capzb(0.14), Actr3(0.14), Myo1d(0.14), Myo1d(0.14), Myh14(0.13), Diaph1(0.12), Myl6(0.12), Capza1(0.11), Treh(0.11), Myh9(0.1), Capza2(0.09), Flna(0.08), Slc9a2(0.08), Myo1b(0.07), Myo1b(0.07), Itpr3(0.06), Gipc1(0.04), Rapgef4(0.03), Myo1e(0.03), Plec(0.02), Dnm1l(0.02), Dab1(0.01), Enpep(-0.03)…
steroid binding	0.00118884	0.352256	2.67591e-11	2.49142e-09	26	0.00577791	0.00154317	4.00263e-05	0.00016714	0.0490073	Sult1e1(1.98), Paqr8(0.13), Paqr5(0.1), Pgrmc1(0.03), Pgrmc2(-0.02), Hsd11b1(-0.07), Atp5o(-0.1), Slc22a2(-0.12), Nr3c1(-0.13), Hsd17b10(-0.15), Esrrb(-0.15), Paqr7(-0.29), Gstm1(-0.34), Esrra(-0.35), Esrrg(-0.38), Nr3c2(-0.42), Nr3c2(-0.42), Esr1(-0.45), Paqr9(-0.48), Pgr(-0.54), Ar(-0.55), Gper1(-0.56), Ugt1a10(-0.67), Ugt1a1(-0.77), Igf1(-0.87), Hsd11b2(-1.29),
sodium channel activity	0.00111654	0.462039	3.51402e-11	3.18784e-09	15	0.00550593	0.0180846	3.41827e-05	0.000105589	0.0120732	Asic1(0.13), Scn5a(0.07), Hcn2(-0.11), Scnn1a(-0.19), Scnn1b(-0.2), Hcn3(-0.21), Slc4a11(-0.23), Kcnk1(-0.27), Asic2(-0.3), Scn1b(-0.33), Trpm2(-0.55), Scn7a(-0.64), Scnn1g(-0.71), Scn4b(-1.08), Scn2b(-1.67),
mitochondrial respiratory chain complex I assembly	0.00144467	0.397813	4.31654e-11	3.81798e-09	20	0.00419054	0.0113471	0.000125812	0.000235409	0.00738747	Ndufs4(0.03), Taz(-0.01), Ndufaf6(-0.09), Ndufaf6(-0.09), Ndufs8(-0.09), Ndufs5(-0.09), Ndufc2(-0.1), Ndufaf4(-0.1), Oxa1l(-0.11), Ndufaf7(-0.13), Ndufaf7(-0.13), Ndufaf5(-0.15), Ndufs7(-0.16), Nubpl(-0.18), Acad9(-0.18), Timm21(-0.27), Timm21(-0.27), Foxred1(-0.27), Ndufaf3(-0.34), Bcs1l(-0.35),
potassium ion transmembrane transport	0.0015113	0.243389	6.04128e-11	5.21319e-09	53	0.00272452	0.0269871	3.58764e-05	0.00182775	0.00245144	Kcna7(0.49), Kcne4(0.43), Slc9a4(0.41), Kcns3(0.37), Kcnq4(0.31), Kcnj2(0.27), P2ry12(0.2), Kcnc2(0.16), Slc9a8(0.14), Kcna1(0.11), Kcna1(0.11), Kcnt1(0.09), Slc9a2(0.08), Kcnh2(0.06), Kcnh2(0.06), Slc9a7(0.06), Kcnh7(0.05), Kcnd1(0), Tmem38b(-0.01), Tmem38a(-0.01), Kcnh1(-0.03), Kcnh1(-0.03), Kcnk6(-0.03), Kcnip4(-0.05), Slc9a6(-0.06), Kcnk2(-0.07), Hcn2(-0.11), Kcnc3(-0.11), Slc9a1(-0.11), Kcnq…
L-glutamate transmembrane transporter activity	0.00120885	0.510861	6.85227e-11	5.77222e-09	12	0.000833124	8.50141e-05	0.00317155	0.00179792	0.0352524	Slc25a22(0.53), Slc17a8(0.07), Slc38a7(-0.05), Slc25a12(-0.22), Slc25a13(-0.24), Slc25a13(-0.24), Slc1a1(-0.44), Slc1a1(-0.44), Slc1a2(-0.75), Slc1a2(-0.75), Slc1a2(-0.75), Slc1a3(-0.75),
sodium:potassium-exchanging ATPase activity	0.000935701	0.533146	8.3469e-11	6.86776e-09	12	7.48873e-05	0.000733026	4.99664e-05	0.00101521	0.36804	Atp1b3(0.23), Atp1b2(-0.23), Atp1a1(-0.29), Atp1a1(-0.29), Atp1a1(-0.29), Cpox(-0.34), Atp1b1(-0.43), Atp1b1(-0.43), Atp1a3(-0.46), Atp4a(-0.48), Atp1a2(-1.4), Atp1a2(-1.4),
ligand-gated sodium channel activity	0.000906258	0.541595	1.77616e-10	1.42819e-08	11	0.000398786	0.063483	0.00148582	1.72845e-06	0.0625503	Asic1(0.13), Scnn1a(-0.19), Scnn1a(-0.19), Scnn1a(-0.19), Scnn1b(-0.2), Scnn1b(-0.2), Scnn1b(-0.2), Asic2(-0.3), Scnn1g(-0.71), Scnn1g(-0.71), Scnn1g(-0.71),
adenylate cyclase activity	0.00147572	0.386887	2.80549e-10	2.13785e-08	20	0.00671586	0.0263623	5.95776e-06	0.0473624	0.000329085	Adcy1(0.23), Adcy1(0.23), Adcy4(0.06), Adcy4(0.06), Gucy1b3(-0.08), Gucy1a3(-0.14), Adcy6(-0.17), Adcy6(-0.17), Adcy6(-0.17), Adcy7(-0.22), Adcy7(-0.22), Adcy7(-0.22), Adcy5(-0.24), Adcy5(-0.24), Adcy5(-0.24), Adcy9(-0.25), Adcy9(-0.25), Adcy3(-0.26), Adcy3(-0.26), Adcy3(-0.26),
monooxygenase activity	0.00152449	0.24348	2.9387e-10	2.13785e-08	51	0.00768261	0.00174863	0.0145636	3.51906e-05	0.00941656	Cyp2b10(1.19), Cyp27b1(0.73), Moxd1(0.51), Cyp3a13(0.49), Cyp4a12a(0.38), Ch25h(0.35), Cyp2e1(0.23), Cyp2e1(0.23), Cyp4f18(0.17), Cyp4b1(0.16), Cyp2d9(0.08), Pam(0.05), Cyp20a1(0.05), Dohh(0.02), Cyp51(0.01), Cyp4f14(0.01), Fmo2(-0.01), Coq7(-0.03), Cyp2j6(-0.04), Cyp4v3(-0.04), Mical1(-0.04), Cyp7b1(-0.06), Cyp39a1(-0.07), Coq6(-0.08), Mical3(-0.09), Cyp2r1(-0.09), Cyp27a1(-0.1), Cyp1b1(-0.11), …
PDZ domain binding	0.00192598	0.167831	2.94035e-10	2.13785e-08	106	0.000994129	0.0255918	0.00153706	0.000623386	0.00440685	Dock4(0.59), Musk(0.36), Igsf5(0.29), D230025D16Rik(0.29), Fzd2(0.27), Cxadr(0.26), Gja1(0.23), Fzd3(0.21), Psen1(0.18), Grasp(0.17), Gng5(0.16), Cadm1(0.15), Adgrl2(0.15), Erc1(0.15), Lpar1(0.11), Atp2b1(0.11), Atp2b1(0.11), Cript(0.1), Cask(0.09), Fzd8(0.08), Fzd8(0.08), Cxxc4(0.08), Aqp2(0.06), Mpp6(0.06), Lin7c(0.05), Dlg3(0.05), Arhgap29(0.05), F11r(0.04), Map2k2(0.04), Gipc1(0.04), Mpp3(0.0…
potassium channel activity	0.00206931	0.265807	2.96084e-10	2.13785e-08	42	0.0120062	0.00412003	0.00149062	6.37471e-05	0.0158991	Kcna7(0.49), Kcne4(0.43), Kcns3(0.37), Kcnq4(0.31), Kcnc2(0.16), Kcna1(0.11), Kcnt1(0.09), Kcnh2(0.06), Pkd2(0.05), Kcnh7(0.05), Kcnd1(0), Tmem38b(-0.01), Tmem38a(-0.01), Kcnh1(-0.03), Kcnk6(-0.03), Kcnip4(-0.05), Kcnj15(-0.06), Kcnk2(-0.07), Hcn2(-0.11), Kcnc3(-0.11), Kcnq1(-0.16), Aqp1(-0.21), Hcn3(-0.21), Abcc9(-0.23), Abcc9(-0.23), Kcnk1(-0.27), Kcnk1(-0.27), Kcnd3(-0.31), Tmem175(-0.31), Fxy…
calcium-activated potassium channel activity	0.00236272	0.423718	7.09466e-10	4.96485e-08	16	0.0266032	0.000804	0.000228991	0.00218879	0.0181235	Kcnt1(0.09), Mtmr6(0.01), Tmem38b(-0.01), Tmem38a(-0.01), Kcnmb1(-0.16), Hpn(-0.26), Kcnn2(-0.29), Kcnn4(-0.36), Kcnn4(-0.36), Kcnma1(-0.54), Kcnma1(-0.54), Kcnma1(-0.54), Kcnma1(-0.54), Kcnn3(-0.65), Kcnt2(-0.68), Kcnn1(-0.82),
chloride channel activity	0.00172576	0.275309	7.15679e-10	4.96485e-08	39	0.0219978	0.0348016	0.0129991	5.73681e-07	0.00448603	Clic1(0.41), Clic1(0.41), Ttyh1(0.33), Clic4(0.32), Clic4(0.32), Best1(0.31), Best1(0.31), Gabrb1(0.22), Ano6(0.06), Slc1a4(0.04), Slc26a11(0.02), Slc26a4(0.01), Ttyh3(-0.01), Clcn2(-0.04), Clcnkb(-0.08), Clcc1(-0.09), Clcn3(-0.11), Ttyh2(-0.12), Slc26a2(-0.16), Fxyd1(-0.17), Clcnka(-0.31), Slc26a6(-0.31), Gabrb3(-0.32), Slc26a7(-0.32), Slc26a7(-0.32), Clcn5(-0.33), Cftr(-0.35), Cftr(-0.35), Clic…
heparin binding	0.00114558	0.180844	7.79138e-10	5.30113e-08	117	0.00180939	0.321755	0.000862921	0.00052559	9.9912e-05	Saa1(1.34), Mmp7(1.09), Apoh(0.77), Thbs4(0.74), Impg2(0.73), Itgam(0.63), Ctgf(0.55), Grem2(0.51), Liph(0.5), Col13a1(0.41), Cyr61(0.4), Hbegf(0.36), Hbegf(0.36), Thbs1(0.36), Adamts1(0.34), Pf4(0.34), Pf4(0.34), Pdcd5(0.31), Ager(0.28), Lamc2(0.27), Selp(0.25), Ptprc(0.24), Fgf12(0.21), Crispld2(0.19), Lxn(0.17), Serpine2(0.17), Fgfrl1(0.17), Smoc2(0.13), Chrd(0.11), Fgf7(0.11), Apob(0.11), Ptc…
glycogen catabolic process	0.00267835	0.435443	8.6743e-10	5.79051e-08	15	0.00022173	0.0548119	0.000932727	0.00214295	0.00858059	Stbd1(0.17), Gaa(-0.05), Gaa(-0.05), Pygl(-0.06), Pygl(-0.06), Pygb(-0.09), Pygb(-0.09), Agl(-0.17), Agl(-0.17), Adrb1(-0.57), Pfkm(-0.58), G6pc(-0.67), Pygm(-0.8), Pygm(-0.8), Pygm(-0.8),
iron-sulfur cluster binding	0.00209855	0.216961	9.9055e-10	6.48993e-08	61	0.000948229	6.0867e-05	0.0058848	0.00705527	0.0677259	Cdk5rap1(0.54), Xdh(0.27), Mocs1(0.26), Glrx5(0.18), Fdx1l(0.1), Mutyh(0.06), Fech(0.04), Pold1(0.04), Dpyd(0.04), Fxn(0.03), Ireb2(0.01), Isca2(0.01), Fdx1(0), Iscu(0), Aifm3(0), Ercc2(-0.01), Nubp2(-0.02), Cisd2(-0.02), Tyw1(-0.02), Ddx11(-0.02), Cisd1(-0.04), Ndufs2(-0.05), Ndufv1(-0.06), Nfs1(-0.06), Rev3l(-0.06), Nubp1(-0.06), Rtel1(-0.06), Cdkal1(-0.07), Glrx2(-0.08), Nthl1(-0.09), Ciapin1(…
sodium ion transmembrane transport	0.00277659	0.335911	1.1405e-09	7.33653e-08	25	0.00293055	0.00441513	0.000683438	0.000833058	0.050085	Slc17a4(0.83), Asic1(0.13), Slc8b1(0.13), Slc8b1(0.13), Scn5a(0.07), Slc17a1(0.06), Ano6(0.06), Pkd2(0.05), Hcn2(-0.11), Slc17a3(-0.11), Scnn1a(-0.19), Scnn1b(-0.2), Hcn3(-0.21), Slc4a11(-0.23), Kcnk1(-0.27), Slc12a3(-0.3), Scn1b(-0.33), Scn1b(-0.33), Slc13a1(-0.55), Scnn1g(-0.71), Slc8a1(-0.84), Scn4b(-1.08), Scn4b(-1.08), Scn4b(-1.08), Scn2b(-1.67),
regulation of membrane potential	0.00250982	0.221381	1.66284e-09	1.05056e-07	57	0.00487036	0.0329188	5.80476e-06	0.00502203	0.0327344	Chrnb4(0.95), Cacna1a(0.49), Chrnb1(0.31), Rims3(0.3), Rims2(0.21), Gpr39(0.16), Gpr39(0.16), Nedd4l(0.14), Asic1(0.13), Kcna1(0.11), Wwp2(0.08), Kcnh2(0.06), Kcnh2(0.06), Pxk(0.06), Xirp1(0.05), Kcnh7(0.05), Slc26a11(0.02), Grik5(0.01), Kif5b(0.01), Slc26a4(0.01), Dlg1(-0.01), Dlg1(-0.01), Trpm4(-0.02), Kcnh1(-0.03), Piezo1(-0.06), Kcnk2(-0.07), Dld(-0.11), Hcn2(-0.11), Hcn2(-0.11), Hcn2(-0.11),…
fatty acid beta-oxidation using acyl-CoA dehydrogenase	0.000302973	0.397061	1.95662e-09	1.21448e-07	25	0.00152066	5.6244e-07	0.00151334	0.0388819	0.272664	Acads(0.04), Acads(0.04), Acadl(0), Acadl(0), Ivd(0), Acox1(-0.05), Acad8(-0.1), Acadsb(-0.11), Etfa(-0.12), Etfa(-0.12), Gcdh(-0.15), Gcdh(-0.15), Acadvl(-0.18), Acadvl(-0.18), Acad9(-0.18), Acox3(-0.19), Acad10(-0.21), Etfdh(-0.22), Acad11(-0.24), Acad11(-0.24), Etfb(-0.26), Etfb(-0.26), Acadm(-0.29), Acadm(-0.29), Acox2(-0.39),
sensory perception of sound	0.00310565	0.166319	2.83747e-09	1.73086e-07	99	0.0131628	0.0289556	3.04979e-05	0.00250181	0.0181296	Tub(0.76), Col11a2(0.45), Col11a2(0.45), Adgrv1(0.44), Adgrv1(0.44), Fam65b(0.42), Kcnq4(0.31), Marveld2(0.31), Marveld2(0.31), Spry2(0.3), Casp3(0.28), Serpinb6a(0.27), Cdh1(0.26), Chd7(0.26), Cdkn2d(0.19), Tfap2a(0.18), Usp53(0.17), Lrig1(0.16), Fam107b(0.16), Sod1(0.14), Wdr1(0.14), Axin1(0.13), Cdkn1b(0.13), Myh14(0.13), Diaph1(0.12), Fbxo11(0.12), Alms1(0.12), Tjp1(0.1), Rpl38(0.1), Slc17a8(…
cell adhesion	0.000206706	0.130929	3.10822e-09	1.86388e-07	354	0.054673	0.730888	7.73048e-06	0.0075771	7.31806e-08	Celsr3(1.19), Cd33(1.18), Sell(1.11), Csf3r(1.06), Amica1(1.02), Emilin2(0.84), Itgb3(0.82), Pcdh8(0.77), Lyve1(0.75), Thbs4(0.74), Selplg(0.72), Klra2(0.71), Has1(0.68), Itgam(0.63), Itgam(0.63), Tnfaip6(0.57), Ctgf(0.55), Spp1(0.53), Col6a6(0.52), Cd93(0.48), Vmp1(0.48), Cdh5(0.45), Siglece(0.44), Epha2(0.43), Col13a1(0.41), Tnc(0.41), Cyr61(0.4), Cyr61(0.4), Tnfrsf12a(0.4), Rhob(0.39), Dscaml1…
glucose transport	0.00360039	0.312896	3.53e-09	2.08152e-07	28	0.000246897	0.0084368	0.00610196	0.00243785	0.0399885	Edn1(0.76), Slc2a3(0.5), Slc2a3(0.5), Slc2a1(0.25), Slc2a1(0.25), Akt1(0.11), Braf(0.03), Ednra(0.02), Yes1(0.01), Stxbp3(0), Slc5a2(0), Sorbs1(-0.11), Fabp5(-0.24), Klf15(-0.24), Stxbp4(-0.29), Slc2a8(-0.31), Slc2a9(-0.35), Slc2a12(-0.62), Slc2a4(-0.63), Slc2a4(-0.63), Slc2a4(-0.63), Slc2a10(-0.63), Prkag3(-0.77), Slc5a1(-0.85), Slc5a1(-0.85), Slc2a5(-0.85), Slc2a2(-1.49), Slc2a2(-1.49),
NAD binding	0.00106237	0.276577	3.90381e-09	2.26421e-07	41	0.000900246	2.0433e-05	0.0240563	0.00125532	0.246492	Adh7(0.18), Cyb5r3(0.11), Ctbp1(0.07), Ctbp2(0.07), Me2(0.07), Ugdh(0.04), Sirt2(0.03), Ahcy(0), Hibadh(-0.02), Glyr1(-0.02), Adh1(-0.05), Ndufs2(-0.05), Hpgd(-0.06), Me1(-0.06), Ndufv1(-0.06), Idh3g(-0.07), Bdh2(-0.07), Ldhb(-0.08), Phgdh(-0.1), Dld(-0.11), Sord(-0.11), Htatip2(-0.12), Hsd17b10(-0.15), Nnt(-0.15), Mdh1(-0.16), Grhpr(-0.17), Hadhb(-0.17), Aldh9a1(-0.19), Hadha(-0.19), Me3(-0.22),…
proton transport	0.000673437	0.25294	4.05777e-09	2.31555e-07	52	4.84927e-06	0.065099	0.00240786	2.53688e-06	0.664463	Atp6v1b2(0.26), Atp5g2(0.26), Atp6v0a1(0.17), Atp5l(0.14), CYTB(0.13), Atp6v0c(0.09), Atp6v0e(0.07), Hvcn1(0.07), Hvcn1(0.07), Atp5e(0.05), Atp6v0b(0.05), Atp6v1g3(0.05), Atp6v0a2(0.04), Atp6ap1(0.03), Atp5d(0.03), Atp6v0d1(0.01), Atp6v1f(0.01), Atp6v1h(0.01), Atp5j(-0.04), Atp5j2(-0.05), Atp6v1g1(-0.05), Atp5g3(-0.05), Atp5b(-0.06), Atp5c1(-0.06), Atp5k(-0.06), Atp6v1c1(-0.06), Atp5h(-0.06), Slc…
sodium ion export from cell	0.00289054	0.506318	4.18734e-09	2.35156e-07	11	0.0001157	0.0149345	0.000174336	0.00340918	0.22789	Atp1b3(0.23), Atp1b2(-0.23), Atp1a1(-0.29), Atp1a1(-0.29), Atp1b1(-0.43), Atp1b1(-0.43), Atp1a3(-0.46), Atp1a3(-0.46), Atp4a(-0.48), Atp1a2(-1.4), Atp1a2(-1.4),
cellular sodium ion homeostasis	0.00180263	0.375962	4.57696e-09	2.50774e-07	20	7.8933e-06	0.0879168	0.000324573	0.000739298	0.278394	Atp1b3(0.23), Sgk1(0.14), Sgk1(0.14), Sgk3(-0.03), Slc9a1(-0.11), Sgk2(-0.17), C7(-0.2), Atp1b2(-0.23), Atp1a1(-0.29), Atp1a1(-0.29), Tesc(-0.34), Agt(-0.42), Nr3c2(-0.42), Atp1b1(-0.43), Atp1a3(-0.46), Atp1a3(-0.46), Atp4a(-0.48), Slc8a1(-0.84), Atp1a2(-1.4), Atp1a2(-1.4),
sulfate transport	0.00380064	0.452663	4.60722e-09	2.50774e-07	13	0.0177051	0.000434745	0.00181771	0.00148571	0.0626221	Slc26a11(0.02), Slc26a4(0.01), Slc26a2(-0.16), Racgap1(-0.28), Slc26a6(-0.31), Slc26a6(-0.31), Slc26a6(-0.31), Slc26a7(-0.32), Slc25a10(-0.34), Slc26a1(-0.48), Slc26a1(-0.48), Slc13a1(-0.55), Slc13a1(-0.55),
cellular potassium ion homeostasis	0.00367908	0.452031	5.14352e-09	2.75724e-07	13	0.000448676	0.012266	0.000328184	0.00447022	0.112663	Camk2d(0.42), Atp1b3(0.23), Atp1b2(-0.23), Atp1a1(-0.29), Atp1a1(-0.29), Atp1b1(-0.43), Atp1a3(-0.46), Atp1a3(-0.46), Atp4a(-0.48), Kcnma1(-0.54), Bsnd(-1.14), Atp1a2(-1.4), Atp1a2(-1.4),
ankyrin binding	0.00393717	0.383081	5.92092e-09	3.1266e-07	18	0.000800777	0.00301417	0.00234786	0.00363354	0.0906729	Cdh1(0.26), Sptb(0.21), Scn5a(0.07), Kctd6(0.06), Plec(0.02), Cltc(-0.02), Sptbn1(-0.12), Atp1a1(-0.29), Cacna1d(-0.34), Cacna1d(-0.34), Flnc(-0.42), Rhbg(-0.66), Nrcam(-0.68), Ttn(-0.73), Slc8a1(-0.84), Slc8a1(-0.84), Rhcg(-1.36), Slc4a1(-1.71),
fatty acid beta-oxidation	0.000145851	0.306196	6.39705e-09	3.32835e-07	46	4.29107e-07	5.74773e-07	0.0125488	0.071844	0.778563	Acat3(0.62), Ppard(0.11), Acat2(0.11), Eci3(0.09), Echdc2(0.06), Pex5(0.02), Ehhadh(0.02), Ehhadh(0.02), Acox1(-0.05), Bdh2(-0.07), Echs1(-0.07), Echs1(-0.07), Auh(-0.08), Crot(-0.08), Hsd17b4(-0.09), Hsd17b4(-0.09), Pex2(-0.09), Eci2(-0.09), Slc27a2(-0.1), Acaa1a(-0.1), Acaa1a(-0.1), Acaa1b(-0.1), Hibch(-0.11), Sesn2(-0.11), Acat1(-0.13), Pex7(-0.15), Hadhb(-0.17), Hadhb(-0.17), Acadvl(-0.18), A…
cilium	0.0014467	0.125137	6.95901e-09	3.56826e-07	190	0.00116513	0.0110553	5.52499e-06	0.217948	0.0146051	Tub(0.76), Ift43(0.31), Tmem237(0.26), D1Ertd622e(0.25), Spa17(0.23), Enkur(0.22), Odf2(0.21), Anxa1(0.2), Arl13b(0.2), Arl13b(0.2), Ahi1(0.19), Ahi1(0.19), Dnah17(0.19), Ptpn23(0.19), Kif7(0.18), Kif7(0.18), Calcr(0.15), Snap29(0.15), Sept7(0.15), Kif3a(0.14), Ccp110(0.14), Tmem17(0.14), Hspb11(0.13), Cluap1(0.13), Nek8(0.13), Fam49b(0.12), Ttll7(0.11), Tmem138(0.11), Tmem138(0.11), Gas8(0.11), …
basolateral plasma membrane	0.00279223	0.124425	8.82669e-09	4.46126e-07	179	0.000819733	0.0285644	0.00812136	1.77497e-05	0.156847	Hspa1a(1.78), Aqp9(1.02), Hsp90aa1(0.65), Slco1a1(0.44), Cldn7(0.43), Cldn7(0.43), Hsp90ab1(0.4), Nkd2(0.35), Entpd1(0.33), Cd44(0.33), Cd44(0.33), Best1(0.31), Marveld2(0.31), St14(0.29), Tgfbr1(0.27), Cdh1(0.26), Cxadr(0.26), Itga3(0.26), P2ry2(0.26), Grk2(0.26), Msn(0.25), Pdgfb(0.25), Slc2a1(0.25), Egfr(0.23), Egfr(0.23), Ezr(0.23), Erbb3(0.22), Flot2(0.21), B4galt1(0.21), Gpihbp1(0.21), Arrb…
axon guidance	0.00153586	0.171262	9.94349e-09	4.95494e-07	123	0.00372004	0.739694	0.00139815	0.000196817	3.3978e-05	Cdk5r1(1.12), Nog(0.78), Sema3a(0.71), Sema3a(0.71), Sema3a(0.71), Crmp1(0.47), Efna4(0.39), Foxd1(0.37), Efna1(0.35), Rac1(0.3), Sema3f(0.3), Sema3f(0.3), Nr4a3(0.27), Efna5(0.26), Efna5(0.26), Robo3(0.26), Robo3(0.26), Robo3(0.26), Vasp(0.17), Klf7(0.17), Flot1(0.15), Zfp280d(0.15), Smad4(0.13), Unc5b(0.13), Mapk8ip3(0.1), Cdh4(0.07), Ryk(0.06), Ryk(0.06), Ryk(0.06), Dvl1(0.05), Zfp280c(0.05), …
ATPase activity, coupled to transmembrane movement of substances	0.00497626	0.267266	1.03903e-08	5.1057e-07	36	0.00769841	0.00578211	0.0109769	0.000470408	0.0234558	Abcb1b(0.39), Abca4(0.09), Abcc5(0.06), Abca7(0.05), Abcc1(0.03), Abca5(0.01), Abcb6(-0.01), Abcd4(-0.05), Abcb10(-0.07), Abca3(-0.08), Tap2(-0.09), Abcc6(-0.09), Abca1(-0.11), Abca1(-0.11), Abcg2(-0.11), Abcb1a(-0.14), Tap1(-0.14), Atp6v1d(-0.14), Ipo8(-0.14), Abca2(-0.16), Abcb9(-0.2), Abcb7(-0.22), Abcd3(-0.22), Abcc9(-0.23), Abcb8(-0.28), Abcc10(-0.28), Abcc3(-0.29), Abca9(-0.31), Cftr(-0.35)…
sulfate transmembrane transporter activity	0.00345444	0.464726	1.11325e-08	5.39543e-07	12	0.0429354	0.000436216	0.0178358	4.23194e-05	0.0764439	Slc26a11(0.02), Slc26a4(0.01), Slc26a2(-0.16), Slc26a2(-0.16), Slc26a6(-0.31), Slc26a6(-0.31), Slc26a6(-0.31), Slc26a7(-0.32), Slc26a7(-0.32), Slc25a10(-0.34), Slc26a1(-0.48), Slc26a1(-0.48),
ciliary basal body	0.00240083	0.158061	1.19383e-08	5.70778e-07	117	0.000683	0.00118765	4.70477e-06	0.207032	0.160478	Nedd1(0.32), Ezr(0.23), Ttbk2(0.23), Ssna1(0.2), Ahi1(0.19), Ahi1(0.19), Ptpn23(0.19), Ssx2ip(0.17), Ssx2ip(0.17), Mark4(0.17), Tapt1(0.14), Poc1b(0.13), Alms1(0.12), Alms1(0.12), Akt1(0.11), Gas8(0.11), Spata7(0.08), Topors(0.08), Topors(0.08), Ofd1(0.08), Ofd1(0.08), Ift20(0.07), Tbc1d30(0.07), Cfap126(0.07), Rpgr(0.06), Ick(0.06), Daam1(0.06), Pkd2(0.05), Pkd2(0.05), Ift57(0.05), Ift57(0.05), …
flavin adenine dinucleotide binding	0.000152639	0.211207	1.49047e-08	7.03103e-07	73	0.0140424	4.74204e-09	0.0212897	0.0885508	0.140033	Nos3(0.53), Txnrd1(0.3), Xdh(0.27), Xdh(0.27), Kdm1a(0.27), Ldhd(0.2), Por(0.18), Cyb5r3(0.11), Ndor1(0.08), Dus4l(0.07), Aifm2(0.06), Gfer(0.05), Gfer(0.05), Acads(0.04), Acads(0.04), Nos2(0.03), Agps(0.03), Acadl(0), Acadl(0), Gsr(0), Ivd(0), Aifm3(0), Fmo2(-0.01), Mto1(-0.03), Dus1l(-0.03), Dus3l(-0.03), Acox1(-0.05), Cyb5r4(-0.05), Dus2(-0.07), Maoa(-0.08), Coq6(-0.08), Mtrr(-0.09), Txnrd2(-0…
calcium ion transport	0.00347186	0.176715	1.55102e-08	7.22039e-07	103	0.00792003	0.255928	9.1852e-05	0.0231872	0.000173781	Cyp27b1(0.73), Trpv2(0.62), Trpm6(0.59), Ramp3(0.52), Cacna1a(0.49), Cacna1a(0.49), Camk2d(0.42), Camk2d(0.42), Ccr1(0.4), Ccdc109b(0.29), Cacnb3(0.24), Pkd1l3(0.22), Gja4(0.19), Saraf(0.17), Camk2g(0.16), P2rx7(0.16), Trpc1(0.16), Tpcn2(0.16), Atp2a2(0.15), Selk(0.15), Nfatc1(0.14), Ppp3ca(0.14), Stim2(0.14), Asic1(0.13), Slc8b1(0.13), Ccr5(0.12), Slc24a3(0.12), Trpv6(0.11), Trpv6(0.11), Atp2b1(…
L-glutamate transport	0.00396885	0.449606	1.6376e-08	7.52448e-07	13	0.00106319	0.00258508	0.00383212	0.00186666	0.178257	Slc25a22(0.53), Psen1(0.18), Arl6ip5(0.15), Slc17a8(0.07), Slc25a12(-0.22), Slc25a13(-0.24), Slc1a1(-0.44), Slc1a1(-0.44), Slc1a2(-0.75), Slc1a2(-0.75), Slc1a2(-0.75), Slc1a3(-0.75), Slc1a3(-0.75),
aldehyde dehydrogenase (NAD) activity	0.00348819	0.36752	3.20975e-08	1.43748e-06	19	0.000965466	3.61859e-05	0.0213687	0.0281248	0.138875	Aldh2(-0.02), Aldh2(-0.02), Aldh8a1(-0.02), Aldh3a2(-0.04), Aldh3a2(-0.04), Aldh7a1(-0.07), Aldh3b1(-0.14), Aldh6a1(-0.18), Aldh9a1(-0.19), Aldh1l1(-0.22), Aldh1a1(-0.32), Aldh1a2(-0.33), Aldh1a3(-0.33), Aldh4a1(-0.33), Aldh4a1(-0.33), Aldh5a1(-0.34), Aldh1b1(-0.43), Aldh1l2(-0.52), Aldh1a7(-0.65),
calcium ion transmembrane transport	0.00543447	0.209903	3.47609e-08	1.5373e-06	57	0.00150004	0.109978	0.000624679	0.011811	0.00882655	Trpv2(0.62), Trpm6(0.59), Cacna1a(0.49), Cacnb3(0.24), P2ry12(0.2), Itgav(0.19), Trpc1(0.16), Tpcn2(0.16), Atp2a2(0.15), Asic1(0.13), Slc8b1(0.13), Slc8b1(0.13), Slc24a3(0.12), Trpv6(0.11), Atp2b1(0.11), Cacna2d1(0.1), Mcu(0.1), Itpr3(0.06), Ano6(0.06), Ano6(0.06), Pkd2(0.05), Orai1(0.04), Cacnb2(0.03), Panx1(0.03), Cacng7(0.02), Pkd1(0), Trpc6(-0.04), Cacna1c(-0.07), Trpv4(-0.07), Atp2c1(-0.07),…
bicarbonate transport	0.00411445	0.374148	3.72268e-08	1.62603e-06	18	0.0382811	0.0020791	0.000623603	0.000174915	0.277538	Slc4a8(0.08), Slc26a11(0.02), Slc26a4(0.01), Slc4a7(-0.01), Slc26a2(-0.16), Slc4a9(-0.18), Ptger3(-0.19), Slc4a11(-0.23), Slc4a4(-0.26), Slc4a4(-0.26), Slc26a6(-0.31), Slc26a6(-0.31), Slc26a6(-0.31), Slc26a7(-0.32), Car4(-0.33), Cftr(-0.35), Slc26a1(-0.48), Slc4a1(-1.71),
mitochondrion organization	0.00584547	0.190407	4.33513e-08	1.85084e-06	67	0.00934154	9.24628e-05	0.0172634	0.0228614	0.0386649	Slc25a33(0.45), Cxadr(0.26), Nrf1(0.23), Tmem11(0.19), P2rx7(0.16), Sepn1(0.12), Tert(0.1), Chchd2(0.08), Sharpin(0.07), Atg7(0.06), Oma1(0.04), Phb2(0.03), Fxn(0.03), Pex5(0.02), Pink1(0.02), Park7(0.01), Afg3l1(0.01), Cav2(0), Epas1(0), Hmgcl(-0.01), Man2a1(-0.01), Dctn6(-0.02), Yme1l1(-0.02), Yme1l1(-0.02), Msto1(-0.02), Spg7(-0.02), Afg3l2(-0.03), Mief2(-0.03), Agtpbp1(-0.05), Htt(-0.06), Sto…
pyridoxal phosphate binding	0.00155025	0.237982	4.34198e-08	1.85084e-06	50	0.00503814	2.35184e-06	0.0372518	0.00768302	0.270868	Alas2(1.21), Hdc(0.82), Accs(0.39), Alb(0.34), Got1(0.27), Alas1(0.25), Prosc(0.19), Sptlc2(0.16), Kyat1(0.11), Sgpl1(0.08), Sptlc1(0.06), Thnsl1(0.03), Got2(0.02), Got2(0.02), Marc2(0), Cbs(-0.02), Cbs(-0.02), Mocos(-0.04), Pdxdc1(-0.04), Agxt2(-0.05), Nfs1(-0.06), Pygl(-0.06), Pygb(-0.09), Phykpl(-0.1), Aadat(-0.13), Sdsl(-0.14), Csad(-0.15), Bcat2(-0.16), Gpt(-0.16), Ddc(-0.17), Kyat3(-0.2), C…
lysosomal membrane	0.00254743	0.125543	4.65565e-08	1.96091e-06	186	0.000835236	5.39792e-05	0.221457	0.0404	0.00794902	Acpp(0.45), Hsp90ab1(0.4), Stard3nl(0.34), Litaf(0.32), Npc1(0.3), Tecpr1(0.3), Tecpr1(0.3), Atp6v1b2(0.26), Cp(0.26), Arl8a(0.26), Tmbim1(0.25), Hgsnat(0.24), Hgsnat(0.24), Slc12a4(0.22), Cln3(0.2), Dnajc5(0.2), Tmem165(0.2), Sphk2(0.2), Slc35f6(0.2), Psen1(0.18), Rraga(0.17), 3110002H16Rik(0.17), Laptm5(0.16), Tpcn2(0.16), Tpcn2(0.16), Flot1(0.15), H13(0.15), Tmem63a(0.15), Sppl3(0.14), Gnai3(0…
AMPA glutamate receptor complex	0.00639509	0.375982	4.9958e-08	2.07943e-06	17	0.000711752	0.0410728	0.0104157	0.00524629	0.0173063	Dlg3(0.05), Cacng7(0.02), Cacng7(0.02), Abhd12(0.01), Sacm1l(-0.06), Abhd6(-0.08), Porcn(-0.1), Cpt1c(-0.2), Dlg4(-0.29), Olfm1(-0.35), Shisa7(-0.39), Gria4(-0.54), Gria4(-0.54), Olfm2(-0.66), Gria3(-0.7), Gria3(-0.7), Olfm3(-0.79),
extracellular matrix	0.000400031	0.142435	5.15156e-08	2.11933e-06	256	0.0198213	0.764837	0.000673878	0.0093691	2.76479e-07	Mmp8(1.67), S100a9(1.61), Mmp9(1.42), Mmp7(1.09), Mmp3(0.93), Mmp10(0.91), Hspb1(0.9), Emilin2(0.84), Emilin2(0.84), Serpine1(0.8), Slpi(0.8), Apoh(0.77), Thbs4(0.74), Clu(0.67), Hsp90aa1(0.65), Mmp25(0.5), Cd93(0.48), Adamts4(0.42), Adamts4(0.42), Tnc(0.41), Tnc(0.41), Cyr61(0.4), Cyr61(0.4), Lmcd1(0.37), Thbs1(0.36), Thbs1(0.36), Cfp(0.35), Adamts1(0.34), Ctsd(0.32), Hspa5(0.3), Rac1(0.3), Rpl1…
mitochondrial nucleoid	0.00396288	0.231637	5.78638e-08	2.35313e-06	46	0.085513	2.36943e-05	0.000750768	0.0121237	0.161873	Mterf1a(0.34), Ddx28(0.23), Lrrc59(0.21), Polg(0.12), Tert(0.1), Trmt10c(0.09), Tfb2m(0.03), Uqcc2(0.03), Dhx30(0.02), Ssbp1(0), Tufm(-0.01), Hspa9(-0.03), Fastkd5(-0.03), Polg2(-0.05), 1110008L16Rik(-0.05), Atp5b(-0.06), Tfam(-0.06), Tfam(-0.06), Top1mt(-0.07), Top1mt(-0.07), Lonp1(-0.07), Fastkd2(-0.09), Vdac1(-0.13), Tefm(-0.13), Grsf1(-0.13), Poldip2(-0.14), Supv3l1(-0.14), Slc25a5(-0.15), Hs…
mitochondrial inner membrane presequence translocase complex	0.00851369	0.458903	9.79301e-08	3.93723e-06	11	0.00103076	0.0126612	0.00430643	0.0583607	0.0169459	Timm17a(-0.06), Timm17a(-0.06), Timm50(-0.08), Timm50(-0.08), Timm17b(-0.09), Timm17b(-0.09), Timm21(-0.27), Timm21(-0.27), Timm23(-0.28), Timm23(-0.28), Pam16(-0.36),
lipid metabolic process	0.000482545	0.100216	1.08493e-07	4.29899e-06	380	0.00214979	9.49571e-06	0.0240825	0.000643744	0.768603	Aloxe3(1.37), Ptgs2(1.16), Akr1c21(0.71), Ugcg(0.52), Apoa1(0.51), Liph(0.5), Il1rn(0.49), Acap1(0.43), Agpat4(0.42), Mboat1(0.42), Apobr(0.41), Acsl6(0.41), Lpin3(0.4), Far2(0.39), Lcat(0.37), Ch25h(0.35), Aspg(0.35), Pnpla2(0.34), Mid1ip1(0.34), Acsl4(0.33), Sgms2(0.31), Npc1(0.3), Serinc5(0.3), Prkab2(0.28), Pgs1(0.27), Soat2(0.26), Lpin2(0.25), Chkb(0.24), Ldlrap1(0.24), Sult2b1(0.23), Tm7sf2…
platelet-derived growth factor binding	0.00616762	0.422179	1.09358e-07	4.29899e-06	14	0.0198515	0.0786496	0.0176686	0.0024032	0.000702578	Pdgfa(0.31), Pdgfb(0.25), Col4a1(0.07), Pdap1(0), Col3a1(-0.18), Pdgfra(-0.34), Pdgfra(-0.34), Pdgfra(-0.34), Pdgfrb(-0.34), Pdgfrb(-0.34), Col1a2(-0.51), Col5a1(-0.6), Col6a1(-0.63), Col1a1(-0.68),
Wnt-protein binding	0.00390167	0.255736	1.16232e-07	4.51899e-06	40	0.000607069	0.138331	0.240894	0.000135926	0.00189078	Sfrp2(0.38), Fzd2(0.27), Fzd3(0.21), Fzd3(0.21), Fzd5(0.18), Fzd5(0.18), Fzd6(0.18), Fzd8(0.08), Ryk(0.06), Ryk(0.06), Ror1(-0.04), Lrp6(-0.05), Lrp6(-0.05), Fzd1(-0.07), Fzd1(-0.07), Porcn(-0.1), Fzd9(-0.12), Fzd9(-0.12), Frzb(-0.12), Frzb(-0.12), Fzd4(-0.13), Fzd4(-0.13), Lrp5(-0.14), Lrp5(-0.14), Trabd2b(-0.17), Smo(-0.18), Ror2(-0.19), Ror2(-0.19), Wls(-0.23), Wls(-0.23), Fzd7(-0.25), Fzd7(-0…
interstitial matrix	0.0064205	0.446512	1.22787e-07	4.72197e-06	12	0.00848893	0.102617	0.0417582	0.00262348	0.000383581	Tnc(0.41), Adamtsl4(0.22), Smoc2(0.13), Vwa1(0.07), Ecm2(-0.32), Nav2(-0.41), Abi3bp(-0.44), Col14a1(-0.58), Egflam(-0.61), Ccdc80(-0.65), Igf1(-0.87), Nepn(-1.68),
bicarbonate transmembrane transporter activity	0.00563258	0.463828	1.40826e-07	5.35744e-06	11	0.169123	0.00241949	0.00506413	0.000315981	0.0428242	Slc26a11(0.02), Slc26a4(0.01), Slc26a2(-0.16), Slc4a11(-0.23), Slc26a6(-0.31), Slc26a6(-0.31), Slc26a6(-0.31), Slc26a7(-0.32), Cftr(-0.35), Slc26a1(-0.48), Slc4a1(-1.71),
succinate metabolic process	0.00589047	0.471044	1.55541e-07	5.85431e-06	11	0.00183932	0.000897415	0.00460173	0.0287961	0.181103	Stat5b(-0.05), Suclg2(-0.1), Sdhb(-0.1), Sucla2(-0.11), Sdha(-0.17), Suclg1(-0.22), Suclg1(-0.22), Stat5a(-0.23), Ghr(-0.3), Aldh5a1(-0.34), Aldh5a1(-0.34),
retinoic acid metabolic process	0.00342304	0.412665	1.83594e-07	6.83742e-06	17	0.000173127	0.289078	0.140069	0.000341936	0.00288237	Adh7(0.18), Aldh8a1(-0.02), Adh1(-0.05), Adh1(-0.05), Rbp1(-0.14), Rbp1(-0.14), Aldh1a1(-0.32), Aldh1a1(-0.32), Aldh1a1(-0.32), Aldh1a2(-0.33), Aldh1a2(-0.33), Aldh1a2(-0.33), Aldh1a3(-0.33), Aldh1a3(-0.33), Aldh1a3(-0.33), Cyp26b1(-0.48), Bco2(-0.62),
mitochondrial large ribosomal subunit	0.00634834	0.244151	2.10694e-07	7.70675e-06	45	0.0903646	0.00899588	0.000124439	0.00549118	0.0805519	Mrpl33(0.21), Mterf4(0.09), Mrpl58(0.08), Mrpl58(0.08), Mrpl32(0.08), Mrpl32(0.08), Mrpl17(0.07), Mrpl17(0.07), Mrpl36(0.04), Mrpl16(0.03), Mrpl16(0.03), Mrpl21(0.03), Mrpl20(0.02), Mrpl28(0.02), Mrpl43(0.02), Mrpl43(0.02), Mrpl3(0.01), Mrpl51(0), Mpv17l2(-0.01), Mrpl19(-0.04), Mrpl11(-0.04), Mrpl11(-0.04), Mrpl15(-0.05), Mrpl15(-0.05), Mrpl49(-0.07), Mrpl1(-0.07), Mrpl39(-0.08), Mrpl10(-0.08), M…
cellular calcium ion homeostasis	0.0087004	0.165983	2.11703e-07	7.70675e-06	82	0.0041573	0.0779206	0.00089848	0.0311498	0.0117244	Calca(0.84), Itgb3(0.82), Nucb2(0.43), Ccr1(0.4), Tgfb1(0.26), Itgb1(0.22), Tmem165(0.2), Atp13a3(0.2), Itgav(0.19), Stc1(0.19), Stc1(0.19), Anxa7(0.18), Psen1(0.18), Tpcn2(0.16), Atp2a2(0.15), Atp2a2(0.15), Atp2a2(0.15), Stim2(0.14), Stim2(0.14), Pik3cb(0.13), Slc24a3(0.12), Atp2b1(0.11), Cherp(0.09), Tmem203(0.08), Tmem203(0.08), Pkd2(0.05), Ccl5(0.03), Stim1(0.03), Xk(0.03), Edn3(0.01), Apoe(-…
electron carrier activity	0.00217526	0.249337	2.13471e-07	7.70675e-06	50	0.00206775	0.00272575	0.00815596	0.00215795	0.343073	Glrx(0.9), Sh3bgrl3(0.39), Xdh(0.27), Por(0.18), Glrx5(0.18), CYTB(0.13), Fdx1l(0.1), Cox7a2l(0.06), COX1(0.05), Acads(0.04), Ndufaf2(0.02), Acadl(0), Fdx1(0), Ivd(0), Cox7a1(-0.01), Cyba(-0.01), Uqcr11(-0.01), Cox7a2(-0.03), Acox1(-0.05), Cycs(-0.05), Sdhc(-0.08), Glrx2(-0.08), Ndufa12(-0.09), Acad8(-0.1), Sdhb(-0.1), Txnrd3(-0.1), Acadsb(-0.11), Acadsb(-0.11), Ptges2(-0.12), Etfa(-0.12), Etfa(-…
negative regulation of canonical Wnt signaling pathway	0.00970352	0.144252	2.19908e-07	7.85895e-06	108	0.00533194	0.0859756	0.00460812	0.0133489	0.00531313	Wnt11(0.8), Wnt11(0.8), Nog(0.78), Egr1(0.48), Sox9(0.41), Sox9(0.41), Sfrp2(0.38), Sfrp2(0.38), Sfrp2(0.38), Nkd2(0.35), Cdh1(0.26), Dab2(0.23), Siah2(0.19), Lats2(0.19), Lats2(0.19), Stk3(0.19), Stk3(0.19), Fzd6(0.18), Rgs19(0.18), Mad2l2(0.18), Wwtr1(0.17), Axin1(0.13), Axin1(0.13), Ctnnd1(0.09), Limd1(0.09), Rapgef1(0.07), Hdac1(0.07), Hdac1(0.07), Stk4(0.06), Stk4(0.06), Lzts2(0.06), Ddit3(0…
striated muscle thin filament	0.00940624	0.471944	2.34762e-07	8.30589e-06	10	0.00662888	0.0125102	0.0110375	0.00526208	0.0444639	Lmod1(0.19), Tmod3(0.16), Tmod1(-0.17), Fhod3(-0.23), Tmod2(-0.26), Tnnt2(-0.51), Ttn(-0.73), Neb(-0.88), Acta1(-1.59), Acta1(-1.59),
calcium ion import	0.0113368	0.331678	2.7232e-07	9.52345e-06	20	0.0324052	0.0222998	0.0100399	0.00386101	0.00917159	Cacna1a(0.49), Trpv6(0.11), Cask(0.09), Orai1(0.04), Cacnb2(0.03), Micu1(-0.05), Cacna1c(-0.07), Trpv4(-0.07), Trpv4(-0.07), Cdk5(-0.17), Slc30a1(-0.27), Mcur1(-0.3), Mcur1(-0.3), Cacna1d(-0.34), Cacna1h(-0.45), Cacna1g(-0.78), Slc8a1(-0.84), Slc8a1(-0.84), Casr(-1.1), Atp2a1(-1.83),
2-oxoglutarate metabolic process	0.00643076	0.423522	2.76533e-07	9.52345e-06	14	0.00461965	0.000280082	0.00644589	0.00617289	0.438923	Stat5b(-0.05), Mrps36(-0.06), Idh3g(-0.07), Dlst(-0.08), Dld(-0.11), Idh3b(-0.11), Aadat(-0.13), Ogdh(-0.19), Kyat3(-0.2), Stat5a(-0.23), Idh1(-0.24), Ghr(-0.3), Idh3a(-0.3), Gpt2(-0.5),
negative regulation of cytosolic calcium ion concentration	0.00909695	0.472926	2.77251e-07	9.52345e-06	10	0.0058834	0.0289968	0.00615661	0.00240733	0.0724642	Il6st(0.01), Nol3(-0.03), Npy1r(-0.26), Kcnk3(-0.33), Smpd3(-0.38), Gtf2i(-0.49), Kcna5(-0.52), Nos1(-0.56), Slc8a1(-0.84), Atp1a2(-1.4),
positive regulation of blood pressure	0.00863689	0.342967	2.97078e-07	1.01064e-05	19	0.00829201	0.203247	0.00270595	0.00146635	0.0145216	Ncf2(0.44), Npff(0.05), F11r(0.04), Oxtr(0.04), Adora1(-0.08), Avpr1a(-0.08), Adh5(-0.09), Ephx2(-0.13), Grip2(-0.21), Agtr1a(-0.31), Agtr1a(-0.31), Agtr1a(-0.31), Agtr1a(-0.31), Id2(-0.4), Agt(-0.42), Adra2b(-0.45), Tbxa2r(-0.51), Tbxa2r(-0.51), Adipoq(-3.04),
anchored component of membrane	0.00676242	0.20385	3.07626e-07	1.03655e-05	78	0.00137325	0.232681	0.000235753	0.00249682	0.131112	Cd14(1.38), Cd177(1.31), Dpep2(0.81), Lypd3(0.62), Tnfrsf23(0.61), Mdga1(0.57), Mmp25(0.5), Sema7a(0.47), Cd55(0.44), Cd48(0.41), Nt5e(0.4), Efna4(0.39), Plaur(0.39), Efna1(0.35), Gfra1(0.34), Mmp19(0.28), Efna5(0.26), Rtn4rl2(0.24), Ly6a(0.23), Cd24a(0.21), Gpihbp1(0.21), Folr2(0.19), Cd59b(0.18), Mmp17(0.12), Gpc1(0.11), Treh(0.11), Ncam2(0.09), Ly6c1(0.05), Rgmb(0.05), Ly6e(0.04), Cd52(0.04), …
regulation of cardiac muscle cell membrane potential	0.00909594	0.469179	3.30072e-07	1.10169e-05	10	0.00356967	0.229697	0.000441544	0.0203234	0.0102575	Atp2a2(0.15), Slc8b1(0.13), Fxyd1(-0.17), Agrn(-0.4), Atp1a3(-0.46), Ehd3(-0.53), Ehd3(-0.53), Ank2(-0.57), Ank2(-0.57), Slc8a1(-0.84),
mitochondrial translation	0.00792986	0.248449	3.35227e-07	1.10844e-05	39	0.0408105	0.00642563	0.000259977	0.0382074	0.0503677	Ptrh1(0.17), Chchd1(0.12), Mrps18b(0.1), Mterf4(0.09), Hars(0.08), Mrpl57(0.08), Mterf3(0.07), Mrps12(0.06), Ndufa7(0.03), Mrpl16(0.03), Mrps6(0.03), Mrpl51(0), Mrps17(-0.01), Mrps17(-0.01), Mrps17(-0.01), Mrps18a(-0.02), Mrps18a(-0.02), Mrps15(-0.05), Mrps15(-0.05), Mrps11(-0.08), Mrps18c(-0.08), Qrsl1(-0.08), Qrsl1(-0.08), Gatb(-0.08), Gatb(-0.08), Mrps2(-0.09), Noa1(-0.1), Mrps25(-0.12), Gatc(…
response to nicotine	0.0113693	0.393264	3.86478e-07	1.26607e-05	14	0.0452766	0.0405832	0.000572754	0.0210545	0.00990792	Chrnb4(0.95), Hmox1(0.61), Chrnb1(0.31), Igf2(0.15), Bcl2(-0.06), Chrnb2(-0.2), Chrnb2(-0.2), Chrnb2(-0.2), Abat(-0.33), Chrna4(-1.02), Chrna4(-1.02), Chrna4(-1.02), Chrna4(-1.02), Atp1a2(-1.4),
cilium assembly	0.00151176	0.140704	3.99963e-07	1.29823e-05	138	0.114107	0.00465746	5.67593e-10	0.307229	0.261818	Celsr3(1.19), Snx10(1.16), Ccno(1.03), Iqcb1(0.29), Tmem237(0.26), Tmem237(0.26), Ttbk2(0.23), Ttbk2(0.23), Arl13b(0.2), Ahi1(0.19), Ssx2ip(0.17), Snap29(0.15), Cep83(0.15), Cep83(0.15), Kif3a(0.14), Tmem17(0.14), Sept2(0.13), Cluap1(0.13), Poc1b(0.13), Alms1(0.12), Tmem138(0.11), Tmem138(0.11), Bbip1(0.11), Bbip1(0.11), E2f4(0.1), Trim59(0.09), Rabl2(0.09), Flna(0.08), Ift20(0.07), Ift20(0.07), …
glutathione transferase activity	0.00209572	0.274782	4.07961e-07	1.31215e-05	37	0.368847	0.00031058	0.188248	6.475e-06	0.0214448	Mgst1(0.2), Mgst1(0.2), Gstp2(0.12), Gstp2(0.12), Gstm5(0.09), Gstm5(0.09), Gstp1(0.06), Gstp1(0.06), Eef1e1(0.05), Eef1g(0), Gsto1(-0.04), Gsto1(-0.04), Ltc4s(-0.07), Gstk1(-0.08), Gstk1(-0.08), Hpgds(-0.09), Gstm6(-0.1), Gstt2(-0.15), Gstt2(-0.15), Mgst3(-0.15), Gsta1(-0.17), Gsta4(-0.18), Gsta4(-0.18), Gstt1(-0.18), Gstt1(-0.18), Gsta2(-0.22), Gstz1(-0.22), Gstz1(-0.22), Gstm7(-0.26), Gstm1(-0…
NADH dehydrogenase activity	0.00529467	0.43874	5.06812e-07	1.61541e-05	14	0.00088227	0.0150848	0.0232464	0.000314455	0.410111	ND1(0.06), ND5(0.06), Ndufs2(-0.05), Ndufv1(-0.06), Ndufa9(-0.06), Ndufa9(-0.06), Ndufs8(-0.09), Ndufb7(-0.1), Ndufb8(-0.12), Ndufv2(-0.13), Ndufs7(-0.16), Ndufs3(-0.17), Ndufa13(-0.26), Ndufs1(-0.29),
acetylcholine-activated cation-selective channel activity	0.00898361	0.450514	5.15454e-07	1.62828e-05	11	0.0603511	0.0850346	4.82409e-05	0.0463052	0.00776538	Chrnb4(0.95), Chrnb1(0.31), Chrnb1(0.31), Chrnb2(-0.2), Chrnb2(-0.2), Chrnb2(-0.2), Chrnb2(-0.2), Chrna4(-1.02), Chrna4(-1.02), Chrna4(-1.02), Chrna4(-1.02),
cofactor binding	0.012295	0.342838	6.23217e-07	1.93416e-05	18	0.0224673	0.00170096	0.00296011	0.0662868	0.0494342	Asns(0.21), Sgk1(0.14), Hif1an(0.11), Acly(0.02), Phyh(-0.06), Tkt(-0.13), Pah(-0.16), Suclg1(-0.22), Uros(-0.23), C3(-0.34), Dao(-0.34), Dao(-0.34), Lmo2(-0.34), Ddo(-0.34), Ddo(-0.34), Pgam2(-0.38), Tyms(-0.41), Hacl1(-0.96),
voltage-gated calcium channel activity	0.00852027	0.289739	6.57645e-07	2.02326e-05	30	0.0347827	0.169538	0.00184766	0.0102335	0.00236137	Cacna1a(0.49), Cacna1a(0.49), Cacna1a(0.49), Cacnb3(0.24), Itgav(0.19), Tpcn2(0.16), Cacna2d1(0.1), Pkd2(0.05), Ncs1(0.04), Cacnb2(0.03), Cacng7(0.02), Cacna1c(-0.07), Cacna1c(-0.07), Cacna1c(-0.07), Cacna1c(-0.07), Cacnb1(-0.23), Cacnb1(-0.23), Cacna2d2(-0.32), Cacna2d2(-0.32), Cacna1d(-0.34), Grm7(-0.35), Catsper2(-0.35), Tpcn1(-0.42), Cacna1h(-0.45), Cacnb4(-0.5), Cacnb4(-0.5), Gas6(-0.53), Ca…
regulation of potassium ion transmembrane transport	0.0111858	0.47445	7.14098e-07	2.178e-05	10	0.186216	0.0175626	0.0212028	0.00234319	0.00172806	Kcnab1(0.1), Kcnh2(0.06), Kcnip4(-0.05), Kcnip4(-0.05), Prnp(-0.12), Kcnab2(-0.24), Cacna1d(-0.34), Kcnip3(-0.47), Kcnip2(-1.52), Kcnip2(-1.52),
potassium ion leak channel activity	0.00658057	0.489709	7.34423e-07	2.22084e-05	10	0.00158229	0.0652038	0.000667204	0.00169166	0.434554	Kcnk6(-0.03), Kcnk2(-0.07), Kcnk2(-0.07), Kcnk5(-0.13), Kcnk1(-0.27), Kcnk1(-0.27), Tmem175(-0.31), Tmem175(-0.31), Kcnk3(-0.33), Kcnk3(-0.33),
positive regulation of smoothened signaling pathway	0.0124324	0.289227	8.0466e-07	2.41262e-05	25	0.000439227	0.0177526	0.0419163	0.0178881	0.0709056	Kif7(0.18), Por(0.18), Wnt9a(0.1), Ctnna1(0.07), Ulk3(0.07), Stk36(0.07), Chsy1(-0.01), Dcdc2a(-0.08), Intu(-0.13), Evc(-0.17), Smo(-0.18), Ihh(-0.19), Ift80(-0.21), Gas1(-0.24), Gas1(-0.24), Fgf9(-0.25), Fgf9(-0.25), Dync2h1(-0.25), Foxa1(-0.28), Gpc3(-0.32), Prrx1(-0.45), Ift172(-0.51), Sfrp1(-0.67), Scube1(-0.68), Scube3(-0.85),
protein homotetramerization	0.00861617	0.180965	9.8097e-07	2.91653e-05	65	0.0214205	0.00137623	0.00348696	0.0176006	0.207774	Syt11(0.38), Kcnj2(0.27), Impdh2(0.27), Hprt(0.22), Crtc2(0.21), Vasp(0.17), Crtc3(0.13), Trpv6(0.11), Pfkp(0.07), Thg1l(0.06), Usp16(0.05), Acads(0.04), Cryz(0.04), Evl(0.04), Gpx3(0.04), Dctpp1(0.03), Cda(0.02), Dnm1l(0.02), Golga2(0.02), Rxra(0.01), Dhps(0.01), Crtc1(0.01), Acadl(0), Samhd1(-0.03), Fbp1(-0.05), Cbr4(-0.06), Gls(-0.08), Gls(-0.08), Ppat(-0.08), Acaca(-0.1), Apoa1bp(-0.1), Pcbd1…
carbonate dehydratase activity	0.00638055	0.387234	1.01122e-06	2.98141e-05	15	0.00183806	0.0666172	0.133282	4.33612e-06	0.254984	Car13(0.43), Car5b(0.2), Car2(0.15), Car2(0.15), Car2(0.15), Car14(-0.01), Car14(-0.01), Car8(-0.33), Car4(-0.33), Car4(-0.33), Car15(-0.43), Car9(-0.81), Car12(-0.9), Car7(-1.12), Car3(-2.41),
mitochondrial fusion	0.0136964	0.337287	1.16875e-06	3.41739e-05	18	0.0179343	0.000573276	0.0908001	0.0212213	0.0326622	Bak1(0.07), Bax(0.01), Bax(0.01), Afg3l1(0.01), Fis1(0), Afg3l2(-0.03), Mfn1(-0.05), Mfn1(-0.05), Usp30(-0.06), Miga1(-0.09), Miga1(-0.09), Mfn2(-0.15), Mfn2(-0.15), Chchd3(-0.2), Opa1(-0.21), Opa1(-0.21), Miga2(-0.26), Miga2(-0.26),
carbohydrate metabolic process	0.00628112	0.119466	1.25786e-06	3.64781e-05	160	0.00488761	0.000547519	0.0147761	0.00679053	0.487211	Chil3(1.73), Chil1(1.27), Sec1(0.75), Pdk4(0.64), Chst11(0.52), B4galt6(0.51), Ovgp1(0.47), Hk3(0.33), Taldo1(0.32), H6pd(0.32), Gfpt2(0.28), A3galt2(0.27), Chst7(0.26), Uevld(0.25), Hk2(0.22), B4galt3(0.22), Pgm1(0.22), B4galt1(0.21), Neu3(0.21), B4galt5(0.21), Gnpda2(0.19), Hyal3(0.18), Ppp1r3b(0.18), Stbd1(0.17), Ppp1r2(0.17), B4galt4(0.16), Igf2(0.15), Chst8(0.14), Chst1(0.14), B4galt7(0.14),…
4 iron, 4 sulfur cluster binding	0.0124728	0.227431	1.30902e-06	3.7653e-05	40	0.00494521	0.00250617	0.0112814	0.0573561	0.103358	Cdk5rap1(0.54), Mocs1(0.26), Mutyh(0.06), Pold1(0.04), Dpyd(0.04), Ireb2(0.01), Isca2(0.01), Iscu(0), Ercc2(-0.01), Nubp2(-0.02), Tyw1(-0.02), Ddx11(-0.02), Ndufs2(-0.05), Ndufv1(-0.06), Rev3l(-0.06), Nubp1(-0.06), Rtel1(-0.06), Cdkal1(-0.07), Nthl1(-0.09), Ndufs8(-0.09), Sdhb(-0.1), Nfu1(-0.11), Lias(-0.11), Rsad1(-0.13), Pole(-0.16), Narfl(-0.16), Exo5(-0.16), Exo5(-0.16), Ndufs7(-0.16), Nubpl(…
regulation of heart rate by cardiac conduction	0.00881347	0.306591	1.37013e-06	3.9093e-05	24	0.00097512	0.420624	0.000861221	0.0205888	0.0221254	Kcnj2(0.27), Pkp2(0.14), Cacna2d1(0.1), Dsc2(0.08), Scn5a(0.07), Scn5a(0.07), Kcnh2(0.06), Kcnh2(0.06), Cacnb2(0.03), Gja5(-0.01), Cacna1c(-0.07), Dsg2(-0.07), Jup(-0.07), Cav1(-0.12), Dsp(-0.14), Kcnq1(-0.16), Scn1b(-0.33), Cacna1d(-0.34), Cacna1d(-0.34), Kcna5(-0.52), Ank2(-0.57), Scn4b(-1.08), Kcne1(-1.12), Scn2b(-1.67),
calcium-transporting ATPase activity	0.0138356	0.36784	1.4003e-06	3.96342e-05	15	0.0113992	0.120145	0.000625164	0.00777259	0.0840724	Atp2a2(0.15), Atp2a2(0.15), Atp2b1(0.11), Anxa5(0.04), Atp2c1(-0.07), Atp2c1(-0.07), Atp2c2(-0.2), Atp2a3(-0.47), Atp2a3(-0.47), Atp2b4(-0.56), Atp2b4(-0.56), Atp2b2(-0.62), Atp2b2(-0.62), Atp2a1(-1.83), Atp2a1(-1.83),
oxidoreductase activity, acting on the aldehyde or oxo group of donors, NAD or NADP as acceptor	0.011084	0.329919	1.52479e-06	4.28152e-05	19	0.00779483	0.000289608	0.0213297	0.05281	0.175677	Aldh2(-0.02), Aldh8a1(-0.02), Aldh3a2(-0.04), Aldh7a1(-0.07), Aldh18a1(-0.09), Aldh16a1(-0.1), Htatip2(-0.12), Aldh3b1(-0.14), Aldh6a1(-0.18), Aldh9a1(-0.19), Aldh1l1(-0.22), Aldh1a1(-0.32), Aldh1a2(-0.33), Aldh1a3(-0.33), Aldh4a1(-0.33), Aldh5a1(-0.34), Aldh1b1(-0.43), Aldh1l2(-0.52), Aldh1a7(-0.65),
inward rectifier potassium channel activity	0.00802099	0.363184	1.60167e-06	4.46197e-05	17	0.00240321	0.135324	0.000211579	0.00432132	0.366277	Kcnj8(0.29), Kcnj2(0.27), Kcnj2(0.27), Kcnh2(0.06), Kcnh2(0.06), Kcnh7(0.05), Kcnj15(-0.06), Kcnj15(-0.06), Kcnk1(-0.27), Kcnj5(-0.39), Kcnj5(-0.39), Kcnj16(-0.47), Kcnj10(-0.73), Kcnj10(-0.73), Kcnj12(-0.82), Kcnj12(-0.82), Kcnj1(-1.16),
extracellular matrix structural constituent	0.00624263	0.307243	1.79844e-06	4.971e-05	25	0.0293743	0.258277	0.000164882	0.0572071	0.00399483	Impg2(0.73), Col11a2(0.45), Lamc1(0.19), Col5a2(0.17), Col24a1(0.08), Col4a1(0.07), Pxdn(0), Vcan(-0.01), Col4a2(-0.03), Lamb1(-0.04), Col3a1(-0.18), Fbn1(-0.27), Fbn1(-0.27), Mgp(-0.27), Eln(-0.3), Col4a4(-0.36), Col4a4(-0.36), Fbln1(-0.39), Col4a3(-0.4), Prelp(-0.43), Lama1(-0.45), Col1a2(-0.51), Col5a1(-0.6), Col27a1(-0.66), Col1a1(-0.68),
NADH dehydrogenase (ubiquinone) activity	0.00704211	0.300535	1.85566e-06	5.08939e-05	31	0.0014084	0.0920964	0.0111366	9.05791e-05	0.499402	AA467197(1.05), ND2(0.21), ND4(0.21), ND6(0.13), ND1(0.06), ND5(0.06), Ndufa2(0.06), Ndufa4(0.04), Ndufs4(0.03), Ndufs4(0.03), Ndufa7(0.03), Ndufaf2(0.02), Ndufb9(-0.03), Ndufs2(-0.05), Ndufv1(-0.06), Ndufa12(-0.09), Ndufa10(-0.09), Ndufa5(-0.09), Ndufs8(-0.09), Ndufb7(-0.1), Ndufc2(-0.1), Ndufaf1(-0.11), Ndufb8(-0.12), Ndufv2(-0.13), Ndufv2(-0.13), Ndufa8(-0.15), Ndufs7(-0.16), Ndufs3(-0.17), Nd…
kidney development	0.0147173	0.131083	1.91255e-06	5.20508e-05	117	0.0176159	0.054665	0.0288364	0.0286063	0.00236132	Wnt11(0.8), Sulf1(0.47), Foxd1(0.37), Adamts1(0.34), Tiparp(0.33), Tgfbr1(0.27), Schip1(0.24), Cdkn1c(0.22), Pcsk9(0.22), Foxc1(0.19), Arid5b(0.19), Tfap2a(0.18), Jmjd6(0.17), Ace(0.14), Ace(0.14), Bmp6(0.14), Kif3a(0.14), Smad4(0.13), Ren1(0.13), Pygo2(0.13), Mmp17(0.12), Ctnnd1(0.09), Odc1(0.08), Sgpl1(0.08), Wt1(0.08), Wt1(0.08), C1galt1(0.08), Bcl2l11(0.07), Ift20(0.07), Bag6(0.07), Foxc2(0.0…
oxidoreductase activity, acting on NAD(P)H	0.0120792	0.452757	2.08667e-06	5.63561e-05	10	0.00473531	0.0492019	0.0325198	0.00255227	0.0808973	Ndufs4(0.03), Ndufs2(-0.05), Ndufv1(-0.06), Ndufa5(-0.09), Ndufs8(-0.09), Ndufs3(-0.17), Miox(-0.18), Aifm1(-0.21), Ecsit(-0.25), Ndufs1(-0.29),
ATP metabolic process	0.00807686	0.257086	2.19711e-06	5.88891e-05	35	0.00789136	0.0207779	0.00615986	0.000673353	0.457369	Ampd3(0.53), Ampd3(0.53), Atp6v1b2(0.26), Vcp(0.17), Atp5l(0.14), Guk1(0.08), Atp5d(0.03), Ampd2(0.03), Ampd2(0.03), Hspa8(0), Ak2(-0.03), Atp5j(-0.04), Bad(-0.04), Atp5j2(-0.05), Atp5b(-0.06), Atp5c1(-0.06), Atp5k(-0.06), Atp5h(-0.06), Atp5o(-0.1), Ola1(-0.11), Ndufaf7(-0.13), Atp5a1(-0.14), Slc25a25(-0.19), Atp6v1a(-0.22), Ctns(-0.23), Ak3(-0.24), Ak5(-0.24), Ndufs1(-0.29), Atp5g1(-0.31), Atp7a…
glycerol channel activity	0.0119504	0.440524	2.34567e-06	6.23984e-05	11	0.0231504	0.0343476	0.0107297	0.000189997	0.284148	Aqp9(1.02), Aqp9(1.02), Aqp2(0.06), Aqp1(-0.21), Aqp3(-0.27), Aqp3(-0.27), Aqp7(-0.63), Aqp7(-0.63), Aqp4(-0.89), Aqp6(-0.96), Aqp8(-1.35),
postsynaptic membrane	0.0124852	0.124694	2.59458e-06	6.85047e-05	134	0.0240076	0.299965	0.000514146	0.0417446	0.00374152	Chrnb4(0.95), Pcdh8(0.77), Arc(0.61), Sh2d5(0.43), Sema4c(0.42), Shc4(0.42), Clstn3(0.38), Clstn3(0.38), Musk(0.36), Cpeb1(0.34), Chrnb1(0.31), Grin3b(0.28), Homer3(0.27), Dbn1(0.27), Trappc4(0.24), Erbb3(0.22), Gabrb1(0.22), Arrb2(0.21), Shank3(0.19), Gabbr1(0.18), Nlgn2(0.17), Kcnc2(0.16), Synpo(0.15), Grin2d(0.13), Homer1(0.12), Nsmf(0.12), Magee1(0.12), Lzts1(0.12), Fbxo45(0.11), Lrfn1(0.1), …
mitochondrial intermembrane space	0.0112246	0.179487	2.73954e-06	7.14916e-05	67	0.0624578	0.00132775	0.00370604	0.0298802	0.14358	Glrx(0.9), Txnip(0.37), Star(0.28), Hax1(0.2), Sod1(0.14), Cox17(0.09), Chchd2(0.08), Arl2bp(0.08), Pdia3(0.07), Triap1(0.06), Triap1(0.06), Sdhaf3(0.06), Nln(0.05), Nln(0.05), Arl2(0.04), Timm8a1(0.03), Uqcc2(0.03), Lyn(0.02), Diablo(0.02), Diablo(0.02), Pink1(0.02), Park7(0.01), Slmo2(0.01), Coa4(-0.01), Chchd4(-0.01), Ak2(-0.03), Bloc1s1(-0.04), Bloc1s1(-0.04), Thop1(-0.04), Chchd5(-0.04), Pre…
NAD biosynthetic process	0.0120278	0.426301	2.74812e-06	7.14916e-05	11	0.166864	0.00653971	0.0231489	0.00816368	0.0101628	Nmnat2(0.22), Nmnat3(0.11), Aspdh(0.08), Nmnat1(-0.06), Naprt(-0.2), Nadsyn1(-0.27), Nadsyn1(-0.27), Nampt(-0.43), Qprt(-0.46), Qprt(-0.46), Kynu(-1.2),
regulation of muscle contraction	0.0197155	0.400286	3.20745e-06	8.28317e-05	12	0.0159184	0.0669678	0.013542	0.00658833	0.0396142	Tnnc1(0.54), Atp2a2(0.15), Kcna1(0.11), Anxa6(-0.12), Prkca(-0.14), Adra1b(-0.31), Adra1a(-0.33), Tnnt2(-0.51), Atp1a2(-1.4), Ryr1(-1.79), Atp2a1(-1.83), Tnnt3(-2.18),
transmembrane transporter activity	0.00791424	0.250882	3.23271e-06	8.28792e-05	34	0.0151099	0.00294454	0.0976435	0.00356408	0.119209	Slc2a3(0.5), Slc37a1(0.28), Slc2a1(0.25), Slc22a7(0.24), Gja1(0.23), Slc22a15(0.21), Ralbp1(0.12), Slc22a21(0.11), Sec61a1(0.05), Slc22a23(0), Slc22a4(-0.02), Slc37a3(-0.02), Ndufaf6(-0.09), Slc22a1(-0.1), Slc22a2(-0.12), Slc37a2(-0.15), Slc22a17(-0.17), Slc18b1(-0.17), Slc22a5(-0.2), Aqp1(-0.21), Slc22a6(-0.24), Slc22a8(-0.25), Slc22a12(-0.25), Slc2a13(-0.28), Slc2a8(-0.31), Slc22a13(-0.4), Sv2a…
prostaglandin E receptor activity	0.00471012	0.548596	3.46537e-06	8.69539e-05	10	0.000184628	0.880467	0.000165383	0.00124269	0.145926	Ptger4(-0.04), Ptger4(-0.04), Hpgd(-0.06), Ptger3(-0.19), Ptger3(-0.19), Ptger3(-0.19), Ptger1(-0.24), Ptger1(-0.24), Ptger2(-0.46), Ptger2(-0.46),
microfibril	0.00724164	0.415267	3.49284e-06	8.70259e-05	13	0.0906404	0.292822	0.00229338	0.0104534	0.00125217	Mfap1b(0.21), Mfap1a(-0.01), Mfap5(-0.17), Thsd4(-0.24), Fbn1(-0.27), Fbn1(-0.27), Fbn1(-0.27), Adamts10(-0.31), Adamtsl5(-0.34), Ltbp1(-0.47), Mfap4(-0.48), Mfap2(-0.61), Mfap2(-0.61),
anion:anion antiporter activity	0.0111742	0.376305	3.54004e-06	8.70539e-05	15	0.115417	0.0330847	0.000835717	0.00151135	0.1844	Slc4a8(0.08), Slc26a11(0.02), Slc26a4(0.01), Slc4a2(-0.05), Slc26a2(-0.16), Slc4a9(-0.18), Slc4a3(-0.22), Slc4a11(-0.23), Slc22a6(-0.24), Slc26a6(-0.31), Slc26a6(-0.31), Slc26a6(-0.31), Slc26a7(-0.32), Slc26a1(-0.48), Slc4a1(-1.71),
dipeptidase activity	0.0091975	0.382004	3.54318e-06	8.70539e-05	14	0.0199408	0.0135505	0.106102	0.0139302	0.00988857	Dpep2(0.81), Cndp2(0.16), Cndp2(0.16), Scrn1(-0.1), Dpep1(-0.14), Pepd(-0.18), Cndp1(-0.2), Cndp1(-0.2), Scrn3(-0.23), Naalad2(-0.25), Scrn2(-0.3), Folh1(-0.42), Pm20d2(-0.53), Pm20d2(-0.53),
sensory perception of smell	0.0122865	0.318815	3.60664e-06	8.77802e-05	22	0.00833558	0.208553	0.000987847	0.0675713	0.0125267	Olfr920(0.49), Nxnl2(0.33), Gjb4(0.28), Fzd2(0.27), Gnal(0.07), Bbs4(0.01), Pde1c(-0.02), Pde1c(-0.02), Mkks(-0.03), B3gnt2(-0.07), Olfr558(-0.1), Ubr3(-0.15), Bbs1(-0.26), Adcy3(-0.26), Adcy3(-0.26), Adcy3(-0.26), Pde4a(-0.27), Omp(-0.33), Grm7(-0.35), Nav2(-0.41), Ttc8(-0.42), Igf1(-0.87),
peroxisomal membrane	0.00678127	0.216013	3.62236e-06	8.77802e-05	53	0.00872307	6.08441e-05	0.184515	0.00166268	0.508886	Impdh2(0.27), Mgst1(0.2), Rab8b(0.2), Hmgcr(0.11), Hmgcr(0.11), Ttc1(0.1), Arf1(0.08), Pex13(0.08), Pex13(0.08), Pnpla8(0.05), Atad1(0.05), Map2k2(0.04), Agps(0.03), Pex5(0.02), Pex5(0.02), Pex12(0.02), Pex16(0.01), Pex16(0.01), Far1(0), Gnpat(-0.04), Acox1(-0.05), Pex3(-0.07), Pex14(-0.08), Pex14(-0.08), Mavs(-0.08), Hsd17b4(-0.09), Pex2(-0.09), Pex6(-0.09), Slc27a2(-0.1), Dhrs4(-0.11), Cav1(-0.…
sarcomere organization	0.0155195	0.303323	3.76856e-06	9.07018e-05	21	0.0249717	0.0623302	0.0265533	0.000581197	0.0909389	Itgb1(0.22), Prkar1a(0.17), Cfl2(0.16), Srf(0.14), Wdr1(0.14), Krt8(0.07), Foxp1(0.06), Xirp1(0.05), Krt19(-0.04), Fhod3(-0.23), Fhod3(-0.23), Six4(-0.26), Actg1(-0.27), Mylk3(-0.35), Mylk3(-0.35), Tnnt2(-0.51), Ttn(-0.73), Ttn(-0.73), Ttn(-0.73), Neb(-0.88), Ldb3(-0.89),
mitochondrial ribosome	0.0113718	0.278708	3.90126e-06	9.32612e-05	29	0.0929086	0.0202556	0.000118973	0.0678279	0.0724478	Chchd1(0.12), Gadd45gip1(0.11), Mrpl57(0.08), Mrps12(0.06), Ndufa7(0.03), Mrpl20(0.02), Mrpl20(0.02), Mrpl28(0.02), Mrpl30(0.02), Mrpl38(0.01), Dap3(0), Mrpl51(0), Mrpl51(0), Mrpl40(-0.04), Mrpl40(-0.04), Mtg2(-0.04), Mrpl19(-0.04), Mrpl37(-0.05), Mrps15(-0.05), Mrpl49(-0.07), Mrps24(-0.09), Mrpl13(-0.09), Mrpl13(-0.09), Mrpl48(-0.1), Mrpl48(-0.1), Mrpl47(-0.14), Mrpl12(-0.2), Mrpl23(-0.23), Mtg1…
smoothened signaling pathway	0.0125228	0.172543	3.93124e-06	9.33473e-05	67	0.000200487	0.0618314	0.00298416	0.243675	0.0708239	Ttbk2(0.23), Arl13b(0.2), Hipk1(0.18), Stil(0.16), Kif3a(0.14), Tmem17(0.14), Sept2(0.13), Hspb11(0.13), Cluap1(0.13), Cluap1(0.13), Ptch1(0.09), Ptch1(0.09), Ptpdc1(0.09), Ift20(0.07), Tmem231(0.06), Ift57(0.05), Cenpj(0.05), Map3k10(0.05), Trove2(0.04), Wdr19(0.04), Foxf1(0.03), Hes1(0.01), Tgfbr2(0.01), Disp1(0.01), Dhh(0), Hipk2(-0.01), Gli3(-0.03), Dyrk2(-0.04), Fkbp8(-0.06), Fkbp8(-0.06), W…
sarcoplasmic reticulum	0.0116463	0.198408	4.03025e-06	9.50601e-05	57	0.0013352	0.322508	0.00222149	0.0122754	0.0772886	Rasd1(0.82), Thbs4(0.74), Camk2d(0.42), Thbs1(0.36), Jph1(0.35), Jph1(0.35), Xdh(0.27), Hax1(0.2), Hax1(0.2), Camk2g(0.16), Atp2a2(0.15), Atp2a2(0.15), Atp2a2(0.15), Calr(0.11), Cacna2d1(0.1), Calu(0.09), Sar1a(0.07), Itpr3(0.06), S100a1(0.05), S100a1(0.05), Stim1(0.03), Sri(0.03), Camk2b(0), Tmem38a(-0.01), Tmem109(-0.03), Nol3(-0.03), Syne2(-0.03), Agl(-0.17), Akap6(-0.17), Akap6(-0.17), Jph2(-…
phosphoric ester hydrolase activity	0.0126154	0.18931	4.19006e-06	9.81749e-05	54	0.0289648	2.94619e-05	0.030189	0.0753617	0.231506	Zc3h12a(0.21), Eri1(0.18), Pelo(0.15), Zc3h12c(0.12), Rbbp8(0.11), Endou(0.08), Dbr1(0.08), Harbi1(0.08), Rexo1(0.07), Isg20l2(0.07), Apex1(0.05), Ercc5(0.05), Mgme1(0.05), Dclre1c(0.04), Aen(0.03), Tsn(0.02), Dclre1b(0.02), Rexo2(0.01), Rexo4(0), Iah1(-0.01), Apex2(-0.03), Fbp1(-0.05), Sacm1l(-0.06), Synj2(-0.08), Ercc4(-0.09), Slx1b(-0.1), Smg6(-0.11), Pgap1(-0.13), 4931406C07Rik(-0.15), Rida(-…
mitochondrial proton-transporting ATP synthase complex	0.00622025	0.397459	4.31725e-06	0.00010049	17	0.000198283	0.0429459	0.0757904	7.63739e-05	0.702814	Atp5l(0.14), Atp5l(0.14), Atp5e(0.05), Atp5d(0.03), Atpif1(0.01), Atp5j(-0.04), Atp5j2(-0.05), Usmg5(-0.05), Usmg5(-0.05), Atp5b(-0.06), Atp5c1(-0.06), Atp5k(-0.06), Atp5h(-0.06), Atp5o(-0.1), Atp5f1(-0.12), Atp5a1(-0.14), Atp5g1(-0.31),
aerobic respiration	0.0154159	0.286849	4.50952e-06	0.000104279	24	0.00375454	0.00932195	0.0779508	0.00410522	0.200828	Mtfr1(0.11), Cox11(0.08), COX1(0.05), Fxn(0.03), Pank2(0.03), Pmpcb(-0.01), Bloc1s1(-0.04), Chchd5(-0.04), Uqcr10(-0.05), Ndufv1(-0.06), Uqcrb(-0.07), Mtfr1l(-0.09), Sdhb(-0.1), Uqcrc2(-0.11), Oxa1l(-0.11), Mettl17(-0.12), Cox19(-0.13), Uqcrc1(-0.14), Adsl(-0.16), Cox10(-0.16), Cat(-0.19), Mtfr2(-0.24), Sirt3(-0.28), Cox20(-0.47),
voltage-gated chloride channel activity	0.0127102	0.384585	5.20004e-06	0.000119466	13	0.00355579	0.0910177	0.0521144	0.00104987	0.128903	Ano6(0.06), Clcn4(-0.02), Clcn2(-0.04), Clcn2(-0.04), Clcn7(-0.06), Clcnkb(-0.08), Clcn3(-0.11), Clcn3(-0.11), Clcn6(-0.28), Clcnka(-0.31), Clcn5(-0.33), Clcn5(-0.33), Ano1(-0.5),
mitochondrial respiratory chain complex III	0.0178134	0.464677	5.26847e-06	0.000120257	10	0.00509117	0.022842	0.0392988	0.00621917	0.152548	Uqcc3(0.02), Pmpcb(-0.01), Uqcr10(-0.05), Uqcrb(-0.07), Uqcrh(-0.08), Uqcrc2(-0.11), Uqcrc2(-0.11), Uqcrfs1(-0.12), Uqcrc1(-0.14), Uqcrc1(-0.14),
acyl-CoA metabolic process	0.00890094	0.27584	5.71977e-06	0.000129721	30	0.000473276	0.000141428	0.507506	0.0518858	0.102508	Acot10(0.32), Acot9(0.31), Acot2(0.31), Acot2(0.31), Acot5(0.26), Acot7(0.13), Gpat4(0.09), Acot8(0.07), Acot8(0.07), Ehhadh(0.02), Hmgcl(-0.01), Baat(-0.02), Acadsb(-0.11), Acot12(-0.13), Gcdh(-0.15), Acot1(-0.17), Acot6(-0.18), Scp2(-0.2), Acnat2(-0.26), Oxsm(-0.28), Ces1d(-0.3), Gpam(-0.33), Slc27a3(-0.38), Hnf4a(-0.39), Acot4(-0.57), Acot4(-0.57), Acnat1(-0.82), Acot11(-0.83), Acot3(-0.92), A…
mitochondrial outer membrane	0.0178031	0.122338	5.82558e-06	0.00013128	129	0.0226061	0.0105779	0.0514737	0.00487208	0.100346	Arg1(1.48), Ppp1r15a(0.63), Acsl6(0.41), Acsl4(0.33), Bcl2l1(0.28), Bcl2l1(0.28), Vat1(0.25), Gja1(0.23), Hk2(0.22), Hax1(0.2), Mgst1(0.2), Tomm7(0.18), Mcl1(0.17), Mlxip(0.17), Ppp1cc(0.14), Ddx3x(0.12), Rab11fip5(0.12), Sh3glb1(0.12), Gimap3(0.12), Cyb5r3(0.11), Tomm34(0.1), March5(0.1), Tmem173(0.1), Mief1(0.09), Bcl2l2(0.08), Bnip3l(0.08), Bnip3l(0.08), Tigar(0.08), Tomm70a(0.06), Aifm2(0.06)…
substrate-specific transmembrane transporter activity	0.0142977	0.398394	6.14632e-06	0.000137631	13	0.00146648	0.045361	0.0128829	0.00701049	0.335746	Slc2a3(0.5), Slc2a1(0.25), Slc22a15(0.21), Abcb9(-0.2), Svopl(-0.22), Slc2a13(-0.28), Slc2a8(-0.31), Slc22a13(-0.4), Slc2a12(-0.62), Slc2a4(-0.63), Slc2a10(-0.63), Slc2a5(-0.85), Slc2a2(-1.49),
collagen-activated tyrosine kinase receptor signaling pathway	0.0226562	0.409529	6.52958e-06	0.000145293	11	0.0521599	0.059817	0.00687872	0.0407473	0.00911087	Col4a1(0.07), Col4a2(-0.03), Ddr1(-0.1), Ddr1(-0.1), Ddr1(-0.1), Ddr2(-0.28), Ddr2(-0.28), Col4a3(-0.4), Col4a5(-0.43), Col4a6(-0.65), Col1a1(-0.68),
fatty-acyl-CoA binding	0.00322375	0.301475	6.66604e-06	0.000146487	35	0.00481518	3.43116e-05	0.027562	0.147186	0.420415	Soat2(0.26), Acot7(0.13), Acbd3(0.12), Pitpna(0.09), Eci3(0.09), Soat1(0.08), Acads(0.04), Acads(0.04), Acbd6(0.01), Acadl(0), Acadl(0), Ivd(0), Dbi(-0.01), Hmgcl(-0.01), Acox1(-0.05), Eci2(-0.09), Acad8(-0.1), Acadsb(-0.11), Etfa(-0.12), Acbd5(-0.13), Gcdh(-0.15), Gcdh(-0.15), Hadhb(-0.17), Acadvl(-0.18), Acadvl(-0.18), Acad9(-0.18), Acox3(-0.19), Hadha(-0.19), Scp2(-0.2), Acad10(-0.21), Acad11(…
telomere maintenance	0.0119354	0.23484	6.95569e-06	0.000150977	39	0.103099	0.000144169	0.0548726	0.0454059	0.0622483	Hspa1a(1.78), Terf1(0.16), Rpa2(0.11), Ctc1(0.07), Tnks2(0.07), Obfc1(0.07), Smg1(0.07), Upf1(0.06), Apex1(0.05), Dclre1c(0.04), Ccne2(0.03), Terf2(0.02), Terf2(0.02), Dclre1b(0.02), Ccne1(-0.02), Pot1a(-0.02), Nbn(-0.03), Terf2ip(-0.03), Xrn1(-0.04), Rad50(-0.05), Rtel1(-0.06), Rtel1(-0.06), Blm(-0.07), Ercc4(-0.09), Smg6(-0.11), Acd(-0.11), Rad51d(-0.15), Rad51d(-0.15), Wrn(-0.19), Wrn(-0.19), …
heparan sulfate proteoglycan binding	0.0194219	0.364822	7.13032e-06	0.000153824	14	0.00492996	0.213121	0.00642085	0.0343499	0.0217307	Itgam(0.63), Ptprc(0.24), Gpc1(0.11), Cfh(-0.18), Grem1(-0.18), Gpc4(-0.26), Fst(-0.32), Gpc3(-0.32), Hpse(-0.33), Agrn(-0.4), Sema5a(-0.44), Slit2(-0.44), Atp1a3(-0.46), Gpc6(-0.59),
adenylate cyclase-activating G-protein coupled receptor signaling pathway	0.00639316	0.25608	7.19426e-06	0.000154262	45	0.000566168	0.915799	0.00243198	0.0137697	0.00253948	Calca(0.84), Adora2b(0.67), Ucn2(0.64), Drd1(0.57), Adrb2(0.54), Adrb2(0.54), Adrb2(0.54), S1pr4(0.44), Adcy1(0.23), Gna13(0.16), Calcr(0.15), Calcr(0.15), Adm2(0.14), Ptgfr(0.12), Gnal(0.07), Calcrl(0.06), Adcy4(0.06), Gnas(0.03), Gnas(0.03), Gnas(0.03), Gnaq(-0.01), Ptger4(-0.04), Ptgir(-0.14), Ptgir(-0.14), Adcy6(-0.17), Adcy6(-0.17), Adora2a(-0.2), Adora2a(-0.2), Adora2a(-0.2), Adora2a(-0.2),…
guanylate cyclase activity	0.0101648	0.448147	7.66523e-06	0.00016208	11	0.254644	0.0521584	0.000176797	0.0396772	0.0198268	Npr2(-0.02), Npr2(-0.02), Gucy1b3(-0.08), Gucy1b3(-0.08), Gucy1a3(-0.14), Gucy1a3(-0.14), Npr1(-0.24), Npr1(-0.24), Npr1(-0.24), Gucy1a2(-0.79), Gucy1a2(-0.79),
phosphatidylinositol dephosphorylation	0.0215518	0.264768	7.67437e-06	0.00016208	27	0.00894982	0.0105419	0.242037	0.00845675	0.028364	Inpp5d(0.29), Tmem55b(0.1), Mtm1(0.09), Inppl1(0.05), Mtmr2(0.03), Mtmr2(0.03), Mtmr6(0.01), Synj1(-0.01), Synj1(-0.01), Mtmr3(-0.02), Tmem55a(-0.03), Ocrl(-0.05), Sacm1l(-0.06), Inpp5e(-0.07), Synj2(-0.08), Mtmr1(-0.08), Pten(-0.1), Mtmr7(-0.11), Inpp5k(-0.15), Inpp5k(-0.15), Inpp5f(-0.22), Inpp5f(-0.22), Inpp5f(-0.22), Inpp4b(-0.23), Inpp5b(-0.24), Inpp5b(-0.24), Inpp5j(-0.58),
potassium channel regulator activity	0.0203725	0.256414	7.69626e-06	0.00016208	28	0.104323	0.016681	0.014145	0.00760815	0.0483484	Adrb2(0.54), Pias3(0.2), Sgk1(0.14), Nedd4l(0.14), Kcnab1(0.1), Ywhae(0.1), Dlg1(-0.01), Sgk3(-0.03), Kcnip4(-0.05), Kcnip4(-0.05), Arpp19(-0.07), Amigo1(-0.07), Alg10b(-0.07), Sumo1(-0.11), Kcnmb1(-0.16), Kcnmb1(-0.16), Sgk2(-0.17), Sgk2(-0.17), Prkcz(-0.18), Abcc9(-0.23), Kcnab2(-0.24), Kcnip3(-0.47), Kcnip3(-0.47), Ank2(-0.57), Kcne1(-1.12), Kcne1(-1.12), Kcnip2(-1.52), Kcnip2(-1.52),
NADH metabolic process	0.0142455	0.441551	7.89766e-06	0.000165337	12	0.0193165	0.00276379	0.0146461	0.00543374	0.466265	Vcp(0.17), Mdh2(0.01), Idh3g(-0.07), Dlst(-0.08), Idh3b(-0.11), Mdh1(-0.16), Mdh1(-0.16), Gpd2(-0.17), Ogdh(-0.19), Idh3a(-0.3), Gpd1l(-0.32), Gpd1(-0.61),
sarcoplasmic reticulum membrane	0.0194823	0.361829	8.57888e-06	0.000177497	14	0.0535941	0.269839	0.00278128	0.0182833	0.00577682	Fkbp1a(0.19), Atp2a2(0.15), Cherp(0.09), Stim1(0.03), Nos1ap(-0.1), Fkbp1b(-0.21), Itpr2(-0.32), Pln(-0.34), Atp2a3(-0.47), Nos1(-0.56), Dmpk(-0.61), Ryr1(-1.79), Ryr1(-1.79), Atp2a1(-1.83),
voltage-gated potassium channel complex	0.0154124	0.214021	8.98812e-06	0.000184884	46	0.219581	0.114358	0.00357616	0.0209456	0.00193749	Kcna7(0.49), Kcne4(0.43), Stx1a(0.42), Kcns3(0.37), Kcnq4(0.31), Kcnj2(0.27), Calm2(0.16), Kcnc2(0.16), Calm1(0.15), Kcna1(0.11), Kcna1(0.11), Kcnab1(0.1), Kcnab1(0.1), Kcnt1(0.09), Cttn(0.08), Cttn(0.08), Kcnh2(0.06), Vamp2(0.05), Kcnd1(0), Kcnh1(-0.03), Kcnip4(-0.05), Kcnip4(-0.05), Kcnk2(-0.07), Amigo1(-0.07), Calm3(-0.09), Kcnc3(-0.11), Sumo1(-0.11), Kcnmb1(-0.16), Kcnq1(-0.16), Cntnap1(-0.22…
hydrogen ion transmembrane transporter activity	0.0103364	0.28052	9.42386e-06	0.000191618	26	0.000967372	0.0326139	0.0774843	0.000337669	0.578944	Atp5g2(0.26), Atp6v0a1(0.17), Atp5l(0.14), Atp6v0c(0.09), Atp6v0e(0.07), Atp6v0b(0.05), Atp6v0a2(0.04), Atp5d(0.03), Atp6v0d1(0.01), Atp5j(-0.04), Atp5g3(-0.05), Atp5k(-0.06), Atp6v1c1(-0.06), Atp5h(-0.06), Atp6v0e2(-0.11), Atp5f1(-0.12), Slc11a2(-0.24), Atp6v0d2(-0.28), Atp5g1(-0.31), Slc46a1(-0.32), Atp6v0a4(-0.32), Slc36a1(-0.37), Slc36a1(-0.37), Atp6v1c2(-0.51), Atp6v1b1(-0.85), Slc36a2(-2.71…
locomotory behavior	0.0111523	0.171961	9.98239e-06	0.000201815	71	0.000919995	0.101333	0.425971	0.000863648	0.0337441	Chrnb4(0.95), Drd1(0.57), Drd1(0.57), Drd1(0.57), Gprc5b(0.44), Penk(0.36), Sepp1(0.36), Chd7(0.26), Gnao1(0.22), Hprt(0.22), Shank3(0.19), Zdhhc8(0.17), Pde1b(0.15), Sod1(0.14), Zfp385a(0.14), B4galt2(0.13), Pak6(0.1), Uba6(0.1), Tal1(0.09), Pex13(0.08), Ddhd2(0.06), Strn(0.03), Als2(0.01), App(0), Gmfb(-0.02), Slc18a2(-0.02), Gaa(-0.05), Nrg1(-0.05), Htt(-0.06), Lmx1b(-0.07), Meis1(-0.07), Hexa…
regulation of vasoconstriction	0.0155553	0.357123	1.00642e-05	0.000202313	15	0.115054	0.132743	0.00295403	0.00103384	0.0827795	Edn1(0.76), Drd1(0.57), Chrm3(0.03), Edn3(0.01), Cacna1c(-0.07), P2rx1(-0.08), Asic2(-0.3), Adra1b(-0.31), Agtr1a(-0.31), Adra1a(-0.33), Tbxa2r(-0.51), Kcna5(-0.52), Per2(-0.66), Atp1a2(-1.4), Atp1a2(-1.4),
regulation of heart rate	0.0221094	0.316561	1.01525e-05	0.000202936	18	0.00701944	0.0361612	0.018395	0.0203996	0.126722	Calca(0.84), Sema3a(0.71), Pde4d(0.28), Mdm2(0.1), Scn5a(0.07), Epas1(0), Mdm4(-0.03), Irx5(-0.15), Fkbp1b(-0.21), Dmd(-0.29), Dmd(-0.29), Snta1(-0.3), Cav3(-0.32), Gpd1l(-0.32), Agt(-0.42), Ank2(-0.57), Cacna1g(-0.78), Slc8a1(-0.84),
regulation of calcium ion transport	0.022805	0.253816	1.05798e-05	0.000210288	28	0.00364176	0.0545274	0.011677	0.0163863	0.206135	Adrb2(0.54), Cxcr4(0.48), Best1(0.31), Grin3b(0.28), Gja1(0.23), P2ry12(0.2), Cacna2d1(0.1), Cacna2d1(0.1), Gnai2(0.04), Orai1(0.04), Stim1(0.03), Sri(0.03), Rhoa(0.02), Bcl2(-0.06), P2rx1(-0.08), Adora2a(-0.2), Cav3(-0.32), Cacna1d(-0.34), Agt(-0.42), Adrb1(-0.57), Vdr(-0.57), Ank2(-0.57), Cckar(-0.61), Cacna1g(-0.78), Cxcl12(-0.81), Slc8a1(-0.84), Igf1(-0.87), Casr(-1.1),
scavenger receptor activity	0.0151614	0.252381	1.0758e-05	0.000212637	31	0.000446277	0.401776	0.004618	0.113039	0.0172066	Ackr2(0.5), Prg4(0.46), Ssc4d(0.35), Tinagl1(0.2), Stab1(0.14), Corin(0.11), Scarf1(0.09), Endou(0.08), Msr1(0.08), Tmprss2(0.06), Cxcl16(0.01), Scara5(-0.09), Enpp2(-0.12), Susd2(-0.12), Ackr4(-0.13), Cd163(-0.14), Scarf2(-0.15), Cfi(-0.16), Loxl4(-0.16), Loxl3(-0.19), Hhipl1(-0.19), Loxl2(-0.23), Ssc5d(-0.27), Ackr3(-0.31), Enpp1(-0.32), Lgals3bp(-0.33), Lgals3bp(-0.33), Enpp3(-0.43), Sbspon(-0…
chloride transmembrane transport	0.00711383	0.284246	1.14267e-05	0.000223358	31	0.00264523	0.826548	0.0408881	1.43641e-05	0.0447716	Slc12a5(0.61), Clic1(0.41), Ttyh1(0.33), Clic4(0.32), Best1(0.31), Gabrb1(0.22), Ano6(0.06), Ano6(0.06), Slc26a11(0.02), Slc26a4(0.01), Clcn4(-0.02), Clcn2(-0.04), Clcn7(-0.06), Clcnkb(-0.08), Clcn3(-0.11), Clcn3(-0.11), Slc26a2(-0.16), Slc12a7(-0.2), Slc4a3(-0.22), Clcn6(-0.28), Clcnka(-0.31), Gabrb3(-0.32), Gabrb3(-0.32), Clcn5(-0.33), Cftr(-0.35), Cftr(-0.35), Clic5(-0.35), Ano1(-0.5), Ano1(-0…
regulation of pH	0.0161736	0.270649	1.18255e-05	0.000229882	25	0.00194753	0.0434951	0.0917192	0.000692913	0.371957	Edn1(0.76), Pdk4(0.64), Slc9a4(0.41), Car2(0.15), Slc9a8(0.14), Slc9a2(0.08), Ednrb(0.06), Slc9a7(0.06), Slc26a4(0.01), Car14(-0.01), Slc9a1(-0.11), Slc9a1(-0.11), Slc9a1(-0.11), Slc9a3(-0.17), Slc9a3(-0.17), Slc4a4(-0.26), Agtr1a(-0.31), Pdk2(-0.31), Atp6v0a4(-0.32), Car4(-0.33), Slc9a9(-0.61), Atp6v1b1(-0.85), Atp6v1b1(-0.85), Car12(-0.9), Rhcg(-1.36),
protein localization	0.0218467	0.160071	1.21902e-05	0.000235676	70	0.0554409	0.00150146	0.0505307	0.187538	0.00941648	Ggn(0.29), Tns4(0.25), Akap2(0.23), Rab35(0.18), Grasp(0.17), Cadm3(0.17), Plod3(0.16), Als2cl(0.15), Ist1(0.14), Kif5c(0.12), Stk11ip(0.11), Ulk1(0.1), Mapk8ip3(0.1), Npm1(0.09), Npm1(0.09), Rack1(0.08), Hap1(0.08), Trp53(0.08), Slc9a2(0.08), Bin3(0.05), Macf1(0.02), Nedd8(0.02), Katna1(0.02), Kif5b(0.01), Cdan1(0.01), Als2(0.01), Bbs4(0.01), Mecp2(0), Icmt(0), Dlg1(-0.01), Dlg1(-0.01), Grip1(-0…
one-carbon metabolic process	0.0158251	0.269548	1.23351e-05	0.000237182	25	0.12183	0.00085545	0.0549232	0.00270457	0.227049	Car13(0.43), Mthfd1l(0.38), Mthfd2(0.25), Car5b(0.2), Mthfd2l(0.2), Car2(0.15), Mat2a(-0.05), Dhfr(-0.06), Mat2b(-0.07), Ahcyl1(-0.07), Fpgs(-0.12), Ahcyl2(-0.16), Gnmt(-0.17), Aldh1l1(-0.22), Shmt2(-0.24), Mthfr(-0.29), Car8(-0.33), Car4(-0.33), Mthfd1(-0.46), Shmt1(-0.52), Aldh1l2(-0.52), Car9(-0.81), Car12(-0.9), Car7(-1.12), Car3(-2.41),
ion transmembrane transport	0.0187295	0.265438	1.24262e-05	0.000237643	27	0.00659526	0.079951	0.00112787	0.0141266	0.383801	Aqp9(1.02), Gja1(0.23), Fam26e(0.17), Kcnc2(0.16), Asic1(0.13), Asic1(0.13), Asic1(0.13), Aqp2(0.06), Slc16a10(0.03), Atp6v1f(0.01), P2rx4(0), Trpm4(-0.02), Kcnh1(-0.03), Slc16a2(-0.1), Anxa6(-0.12), Calhm2(-0.24), Aqp3(-0.27), Asic2(-0.3), Asic2(-0.3), Kcnk3(-0.33), Cacna1h(-0.45), Trpm2(-0.55), Aqp7(-0.63), Aqp4(-0.89), Slc12a1(-0.94), Aqp6(-0.96), Aqp8(-1.35),
odontogenesis of dentin-containing tooth	0.0235089	0.211089	1.2501e-05	0.000237787	40	0.00300136	0.173234	0.01838	0.0811073	0.0122447	Foxc1(0.19), Bmp2(0.11), Bmpr1a(0.11), Ankrd11(0.09), Bcl2l11(0.07), Hdac1(0.07), Hdac2(0.05), Wnt7b(0.04), Eda(0.03), Bax(0.01), Lama5(0.01), Runx2(0), Ctnnb1(-0.03), Dll1(-0.03), Gli3(-0.03), Jag2(-0.03), Traf6(-0.04), Lrp6(-0.05), Chuk(-0.07), Itga6(-0.07), Bmp7(-0.09), Nf2(-0.12), Tcf7l2(-0.13), Bmp4(-0.15), Bmp4(-0.15), Acvr2b(-0.17), Acvr2b(-0.17), Smo(-0.18), Fst(-0.32), Pdgfra(-0.34), Rog…
ubiquinone biosynthetic process	0.0217043	0.371948	1.32796e-05	0.000251131	13	0.070634	0.0130426	0.00560004	0.0250524	0.114582	Coq3(0), Ubiad1(-0.01), Coq2(-0.02), Coq7(-0.03), Coq6(-0.08), Coq5(-0.11), Pdss1(-0.12), Pdss1(-0.12), Coq4(-0.15), Pdss2(-0.22), Pdss2(-0.22), Coq8a(-0.31), Coq9(-0.33),
methyltransferase activity	0.00682439	0.143043	1.33444e-05	0.000251131	145	0.619352	5.06853e-06	0.0976655	0.0785345	0.00506853	Setd4(0.52), Prdm1(0.43), Mettl6(0.37), Trmt10a(0.28), Prdm4(0.24), Bmt2(0.21), Rnmt(0.2), Pemt(0.19), Ezh2(0.18), Prmt2(0.17), Dph5(0.16), Mettl22(0.15), Inmt(0.14), Mepce(0.14), Suv39h1(0.13), Cmtr2(0.13), Mrm1(0.12), Mettl18(0.11), Trmt10c(0.09), Emg1(0.08), Ftsj3(0.08), Ntmt1(0.08), Setd7(0.08), Smyd2(0.08), Whsc1l1(0.08), Ezh1(0.07), Mettl3(0.07), Trmt11(0.07), Setdb1(0.07), Nsun5(0.07), Met…
glycolytic process	0.0165959	0.249414	1.48385e-05	0.000276308	32	0.00190141	0.192867	0.00303033	0.0104619	0.300704	Hk3(0.33), Hk2(0.22), Pgk1(0.1), Pgk1(0.1), Gapdh(0.09), Pkm(0.08), Pkm(0.08), Pfkp(0.07), Eno2(0.04), Aldoa(-0.01), Adpgk(-0.01), Pfkfb2(-0.05), Hkdc1(-0.07), Pgam1(-0.08), Pgam1(-0.08), Gpi1(-0.09), Gpi1(-0.09), Tpi1(-0.12), Tpi1(-0.12), Hk1(-0.13), Hk1(-0.13), Bpgm(-0.14), Ogdh(-0.19), Pfkl(-0.19), Eno3(-0.24), Pgam2(-0.38), Pgam2(-0.38), Aldoc(-0.43), Aldob(-0.44), Pfkm(-0.58), Dhtkd1(-0.64),…
synaptic transmission, cholinergic	0.0173339	0.359881	1.50145e-05	0.000278122	14	0.00283273	0.463719	0.0117374	0.000767515	0.149064	Chrnb4(0.95), Chrnb1(0.31), Chrnb1(0.31), Chrm3(0.03), Chrnb2(-0.2), Chrnb2(-0.2), Adora2a(-0.2), Ric3(-0.32), Ric3(-0.32), Lynx1(-0.37), Lynx1(-0.37), Chrna4(-1.02), Chrna4(-1.02), Chrna4(-1.02),
negative regulation of Wnt signaling pathway	0.0128117	0.193828	1.52919e-05	0.000281785	53	0.0367098	0.646448	0.106284	0.000350952	0.000533001	Sfrp2(0.38), Sfrp2(0.38), Nkd2(0.35), Hmga2(0.34), Csnk1e(0.33), Nfatc4(0.21), Grb10(0.17), Grb10(0.17), Tsku(0.16), Axin1(0.13), Axin1(0.13), Tax1bp3(0.13), Cxxc4(0.08), Lzts2(0.06), Med12(0.04), Znrf3(0.04), Sox17(0.02), Sox17(0.02), Apc(0.01), Apc(0.01), Nlk(-0.01), Chd8(-0.01), Nxn(-0.02), Ctnnbip1(-0.04), Lrp6(-0.05), Dact1(-0.06), Dact1(-0.06), Frzb(-0.12), Frzb(-0.12), Frzb(-0.12), Hic1(-0…
inorganic anion exchanger activity	0.0124523	0.331202	1.5503e-05	0.000283978	18	0.0726718	0.00145184	0.0289108	0.00866342	0.2727	Slc22a22(0.2), Slc22a28(0.13), Slc4a8(0.08), Slc22a30(0.04), Slc4a7(-0.01), Slc22a29(-0.04), Slc4a2(-0.05), Slc4a3(-0.22), Slc4a11(-0.23), Slc22a6(-0.24), Slc22a6(-0.24), Slc22a8(-0.25), Slc22a8(-0.25), Slc22a12(-0.25), Slc4a4(-0.26), Slc22a19(-0.41), Slc22a26(-0.67), Slc4a1(-1.71),
glutathione metabolic process	0.00866157	0.218574	1.56111e-05	0.000283978	48	0.210305	0.000172403	0.275771	0.000683268	0.12918	Gclc(0.28), Mgst1(0.2), Sod1(0.14), Hagh(0.13), Gstp2(0.12), Gstm5(0.09), Gstp1(0.06), Glo1(0.06), G6pdx(0.05), G6pdx(0.05), Eef1e1(0.05), Gpx3(0.04), Gsr(0), Gsr(0), Eef1g(0), Hmgn5(-0.03), Gsto1(-0.04), Ggt1(-0.05), Ethe1(-0.05), Ggt7(-0.06), Gclm(-0.07), Gstk1(-0.08), Txnrd3(-0.1), Gpx1(-0.11), Ggt5(-0.11), Gpx4(-0.11), Gstt2(-0.15), Gstt2(-0.15), Gsta1(-0.17), Gstt1(-0.18), Gstt1(-0.18), Gstt…
iron-sulfur cluster assembly	0.0253093	0.322531	1.56517e-05	0.000283978	17	0.0423622	0.00261913	0.0304088	0.0314111	0.144733	Iba57(0.15), Fam96b(0.05), Fxn(0.03), Isca2(0.01), Iscu(0), Nubp2(-0.02), Mms19(-0.03), Nubp1(-0.06), Ciapin1(-0.09), Nfu1(-0.11), Ciao1(-0.12), Fam96a(-0.15), Narfl(-0.16), Narfl(-0.16), Isca1(-0.24), Hscb(-0.24), Hscb(-0.24),
ER membrane protein complex	0.0198272	0.340884	1.60649e-05	0.000289987	17	0.0364407	0.0358196	0.0130718	0.0107977	0.118858	Mmgt2(0.08), Emc4(0.03), Emc6(0.02), Emc6(0.02), Emc7(0.01), Emc7(0.01), Emc3(-0.02), Emc3(-0.02), Emc10(-0.02), Emc10(-0.02), Emc8(-0.04), Mmgt1(-0.06), Mmgt1(-0.06), Emc2(-0.09), Emc1(-0.09), Emc1(-0.09), Emc9(-0.35),
peroxisome organization	0.0160633	0.306837	1.69425e-05	0.000303358	21	0.00441937	0.000562357	0.156852	0.0309173	0.301724	Acot8(0.07), Pex5(0.02), Pex5(0.02), Pex12(0.02), Pex16(0.01), Pex16(0.01), Pex3(-0.07), Pex14(-0.08), Pex2(-0.09), Pex6(-0.09), Sec16b(-0.11), Pex19(-0.12), Pex11b(-0.13), Pex7(-0.15), Scp2(-0.2), Pex10(-0.21), Abcd3(-0.22), Pex11a(-0.25), Tmem135(-0.28), Pex1(-0.34), Abcd1(-0.38),
response to peptide hormone	0.0196675	0.262211	1.69771e-05	0.000303358	28	0.0641494	0.0160669	0.00137348	0.00802805	0.41958	Serpina3m(0.57), Serpina3n(0.32), Plcd1(0.22), Pld2(0.18), Eif2b2(0.16), Eif2b3(0.1), Prkci(0.06), Braf(0.03), Eif2b1(-0.01), Eif2b5(-0.01), Eif2b4(-0.03), Stat5b(-0.05), Ccnd3(-0.19), Stat5a(-0.23), Irs1(-0.24), Pld1(-0.31), Stat1(-0.34), Apoc3(-0.39), Aldob(-0.44), Plcb1(-0.52), Serpina1b(-0.53), Serpina1a(-0.54), Nos1(-0.56), Serpina1d(-0.7), Srd5a2(-0.73), Gatm(-0.79), Atp2a1(-1.83), Serpina3…
mitochondrial acetyl-CoA biosynthetic process from pyruvate	0.00991353	0.497415	1.78971e-05	0.00031819	10	0.000407885	0.00187429	0.25082	0.00700504	0.552921	Mpc1(0.1), Mpc1(0.1), Pdhx(-0.06), Dld(-0.11), Dld(-0.11), Pdha1(-0.11), Mpc2(-0.16), Dlat(-0.19), Dlat(-0.19), Pdhb(-0.25),
heme binding	0.0134755	0.178479	1.82096e-05	0.000321653	78	0.53693	0.0050024	0.017046	0.000272129	0.120393	Hbb-b2(1.87), Hba-a1(1.48), Hba-a2(1.37), Cyp2b10(1.19), Ptgs2(1.16), Cyp27b1(0.73), Hmox1(0.61), Nos3(0.53), Cyp3a13(0.49), Cyp4a12a(0.38), Cyp2a4(0.26), Nr1d1(0.25), Cyp2e1(0.23), Src(0.22), Upk3bl(0.2), Cyp4f18(0.17), Cyp4b1(0.16), Jak2(0.16), Prdx1(0.14), Fa2h(0.13), Cyp2d9(0.08), COX1(0.05), Cyp20a1(0.05), Dgcr8(0.05), Fech(0.04), Cyb5d2(0.04), Nos2(0.03), Pgrmc1(0.03), Cyp51(0.01), Cyp4f14(…
mismatch repair	0.00697224	0.310615	1.82737e-05	0.000321653	31	0.0435594	0.00145868	0.0843401	0.0488537	0.0653313	Rnaseh2a(0.19), Rnaseh2a(0.19), Rpa2(0.11), Pcna(0.07), Pcna(0.07), Pms2(0.05), Pms2(0.05), Pms2(0.05), Pms2(0.05), Msh5(0.03), Tdg(0.02), Msh6(-0.02), Msh6(-0.02), Msh6(-0.02), Setd2(-0.03), Msh2(-0.04), Msh2(-0.04), Msh2(-0.04), Msh2(-0.04), Xpc(-0.05), Mlh3(-0.1), Mlh3(-0.1), Msh3(-0.11), Msh3(-0.11), Msh3(-0.11), Rpa3(-0.16), Rpa1(-0.22), Mlh1(-0.29), Mlh1(-0.29), Mlh1(-0.29), Pms1(-0.29),
calmodulin binding	0.0204811	0.11491	1.8642e-05	0.000326511	143	0.0433778	0.246063	0.0038382	0.125664	0.00131461	Nrgn(1.19), Nrgn(1.19), Nrgn(1.19), Sphk1(0.66), Sphk1(0.66), Nos3(0.53), Cacna1a(0.49), Marcksl1(0.49), Camk2d(0.42), Ceacam2(0.33), Itpkc(0.33), Mapkapk2(0.29), Iqcb1(0.29), Iqcb1(0.29), Myo9b(0.26), Egfr(0.23), Adcy1(0.23), Enkur(0.22), Cnn3(0.22), Mknk2(0.21), Fbxl2(0.21), Camsap1(0.2), Mapkapk3(0.19), Iqgap3(0.19), Sntb2(0.17), Camk2g(0.16), Pde1b(0.15), Ppp3ca(0.14), Myo1d(0.14), Aebp1(0.13…
antiporter activity	0.0257696	0.222553	1.90982e-05	0.000332855	35	0.0805814	0.0498382	0.0385533	0.00455192	0.037134	Slc9a4(0.41), Slc37a1(0.28), Slc7a6(0.26), Slc7a1(0.15), Slc9a8(0.14), Slc7a13(0.13), Slc8b1(0.13), Slc7a5(0.12), Slc24a3(0.12), Slc4a8(0.08), Slc9a7(0.06), Slc7a3(0.03), Clcn4(-0.02), Tmco3(-0.02), Slc4a2(-0.05), Clcn7(-0.06), Clcn3(-0.11), Slc9a1(-0.11), Slc37a2(-0.15), Slc9a3(-0.17), Slc4a3(-0.22), Slc7a2(-0.26), Slc7a8(-0.27), Clcn6(-0.28), Slc7a9(-0.28), Slc26a6(-0.31), Clcn5(-0.33), Slc25a1…
acyl-CoA dehydrogenase activity	0.00427793	0.392092	1.95396e-05	0.000338877	18	0.0185804	0.000242331	0.0235325	0.078899	0.410868	Acads(0.04), Acads(0.04), Acadl(0), Ivd(0), Acox1(-0.05), Acad8(-0.1), Acad8(-0.1), Acadsb(-0.11), Acadsb(-0.11), Etfa(-0.12), Gcdh(-0.15), Acadvl(-0.18), Acad9(-0.18), Acox3(-0.19), Acad10(-0.21), Acad11(-0.24), Acadm(-0.29), Acox2(-0.39),
cAMP biosynthetic process	0.0194004	0.314684	2.04092e-05	0.000352233	19	0.164966	0.188002	0.00214903	0.0644013	0.00163925	Ucn2(0.64), Adcy1(0.23), Adcy1(0.23), Adm(0.13), Calcrl(0.06), Adcy4(0.06), Adcy4(0.06), Ramp2(0.01), Adcy6(-0.17), Adcy6(-0.17), Adcy7(-0.22), Adcy7(-0.22), Adcy5(-0.24), Adcy5(-0.24), Adcy9(-0.25), Adcy9(-0.25), Adcy3(-0.26), Adcy3(-0.26), Adcy3(-0.26),
oxidoreductase activity, acting on the CH-CH group of donors	0.005453	0.316401	2.12126e-05	0.000363043	25	0.0144509	0.00222863	0.0326234	0.0562223	0.243649	Tm7sf2(0.23), Acads(0.04), Dpyd(0.04), Lbr(0.02), Acadl(0), Ivd(0), Srd5a3(0), Acox1(-0.05), Sdhc(-0.08), Acad8(-0.1), Tecr(-0.1), Acadsb(-0.11), Gcdh(-0.15), Srd5a1(-0.16), Dhodh(-0.17), Sdha(-0.17), Acadvl(-0.18), Acad9(-0.18), Acox3(-0.19), Acad10(-0.21), Cox15(-0.21), Acad11(-0.24), Acadm(-0.29), Acox2(-0.39), Srd5a2(-0.73),
serine-type endopeptidase inhibitor activity	0.012819	0.203197	2.23151e-05	0.000379572	65	0.0572193	0.000639487	0.00312475	0.0333051	0.594852	Serpine1(0.8), Serpine1(0.8), Slpi(0.8), Pzp(0.75), Serpina3m(0.57), Wfdc17(0.56), Serpinb5(0.43), Serpinb1a(0.42), Serpina3n(0.32), Serpinb6a(0.27), Serpinb6a(0.27), Serpinb6a(0.27), Wfdc2(0.19), Serpinb6b(0.17), Serpinb6b(0.17), Serpine2(0.17), Serpine2(0.17), Serpinf1(0.13), Spint1(0.08), Serpinh1(0.07), Itih2(0.07), Spint2(0.06), Itih1(0.03), Furin(0.02), Crim1(0.02), App(0), Spink8(-0.03), P…
lysosome	0.00888845	0.0889532	2.38112e-05	0.000403082	317	0.000195161	0.00269865	0.513865	0.286725	0.0126427	Mt1(0.77), Il1b(0.74), Il4i1(0.52), Ramp3(0.52), Cxcr4(0.48), Acpp(0.45), Ctsl(0.43), Ctsl(0.43), Arrdc3(0.42), Epdr1(0.41), 3110043O21Rik(0.4), Syt11(0.38), Znrf1(0.35), Ctsc(0.34), Ctsc(0.34), Bcl10(0.32), Ctsd(0.32), Ctsd(0.32), Litaf(0.32), Npc1(0.3), Tecpr1(0.3), Slc30a4(0.29), 4930486L24Rik(0.29), Ctss(0.27), Ctss(0.27), Got1(0.27), Zc3hav1(0.27), P2ry2(0.26), Arl8a(0.26), Tmbim1(0.25), Hgs…
methylation	0.00812217	0.136358	2.48893e-05	0.000419325	152	0.679999	6.94769e-06	0.0903439	0.0717719	0.00838292	Setd4(0.52), Prdm1(0.43), Mettl6(0.37), Trmt10a(0.28), Dnmt3l(0.26), Prdm4(0.24), Bmt2(0.21), Fam103a1(0.2), Rnmt(0.2), Pemt(0.19), Ezh2(0.18), Prmt2(0.17), Dph5(0.16), Mettl22(0.15), Inmt(0.14), Mepce(0.14), Suv39h1(0.13), Cmtr2(0.13), Mrm1(0.12), Mettl18(0.11), Trmt10c(0.09), Emg1(0.08), Ftsj3(0.08), Ntmt1(0.08), Setd7(0.08), Smyd2(0.08), Whsc1l1(0.08), Ezh1(0.07), Mettl3(0.07), Trmt11(0.07), S…
protein targeting to plasma membrane	0.0242631	0.243491	2.71536e-05	0.000455306	29	0.00697456	0.1958	0.00277901	0.104757	0.0462446	Nkd2(0.35), Myl12a(0.19), Pip5k1a(0.16), Tmed2(0.13), Ptch1(0.09), Anxa2(0.08), Pacs1(0.08), Pacs1(0.08), Myadm(0.05), Pacs2(0.04), Pacs2(0.04), Bsg(-0.03), Sptbn1(-0.12), Sptbn1(-0.12), Inpp5k(-0.15), Atp2c2(-0.2), Ank1(-0.24), Ank1(-0.24), Prkg2(-0.33), Tesc(-0.34), Ank3(-0.41), Ank3(-0.41), Palm(-0.45), Gas6(-0.53), Ehd3(-0.53), Ehd3(-0.53), Ank2(-0.57), Ank2(-0.57), Kcnb1(-0.58),
basal lamina	0.0259371	0.291546	2.72962e-05	0.000455538	20	0.0481299	0.309135	0.0145256	0.033065	0.00225052	Entpd1(0.33), Lamc1(0.19), Lama5(0.01), Entpd2(-0.01), Dlg1(-0.01), Nid1(-0.03), Lamb1(-0.04), Lamb2(-0.09), Lama4(-0.11), Hspg2(-0.24), Fn1(-0.27), Ache(-0.29), Lama2(-0.34), Lama2(-0.34), Col4a4(-0.36), Agrn(-0.4), Agrn(-0.4), Col4a5(-0.43), Lama1(-0.45), Ang(-0.56),
insulin-like growth factor receptor signaling pathway	0.0175518	0.345613	2.8676e-05	0.000476317	15	0.0220696	0.000487921	0.150936	0.485659	0.00442028	Grb10(0.17), Akt1(0.11), Gigyf1(0), Eif2ak3(-0.04), Igf1r(-0.05), Igf1r(-0.05), Gigyf2(-0.09), Tsc2(-0.17), Tsc2(-0.17), Irs1(-0.24), Pik3r1(-0.24), Ghr(-0.3), Plcb1(-0.52), Igf1(-0.87), Igf1(-0.87),
glucose import	0.0284708	0.345959	3.13826e-05	0.00051884	14	0.00298066	0.190392	0.0102892	0.0588606	0.0745495	Drd1(0.57), Slc2a6(0.27), Rab4b(0.07), Tsc1(0), Sesn2(-0.11), Tsc2(-0.17), Hnf1a(-0.18), Hnf1a(-0.18), Slc2a13(-0.28), Sort1(-0.3), Sort1(-0.3), Slc2a8(-0.31), Slc2a12(-0.62), Slc2a10(-0.63),
carboxylic ester hydrolase activity	0.010628	0.231777	3.1653e-05	0.000520876	46	0.00515288	0.000115593	0.23979	0.00882208	0.649159	Liph(0.5), Acot10(0.32), Acot9(0.31), Acot2(0.31), Acot5(0.26), Esd(0.23), Abhd4(0.2), Nlgn2(0.17), Abhd5(0.14), Acot7(0.13), Fam135a(0.1), Ces1e(0.09), Lypla2(0.09), Acot8(0.07), Ppme1(0.06), Ces1f(0.02), Ces2c(0), Pnpla6(-0.01), Baat(-0.02), Lypla1(-0.02), Abhd3(-0.05), Lpl(-0.06), Ces2b(-0.07), Abhd2(-0.13), Acot12(-0.13), Lyplal1(-0.15), Acot1(-0.17), Acot6(-0.18), Pla1a(-0.2), Pnpla7(-0.25),…
excretion	0.0256687	0.366696	3.26387e-05	0.00053461	13	0.00911097	0.0215058	0.0364954	0.00775327	0.370531	Dab2(0.23), Guca2b(0.16), Nphs2(0.09), Kirrel(-0.07), Amn(-0.11), Umod(-0.12), Grhpr(-0.17), Atp6v0a4(-0.32), Agt(-0.42), Nr3c2(-0.42), Atp6v1b1(-0.85), Atp6v1b1(-0.85), Slc12a1(-0.94),
response to nutrient	0.0320722	0.332683	3.35306e-05	0.000546689	15	0.0534071	0.0589511	0.0203956	0.0187867	0.0534164	Dpyd(0.04), Plec(0.02), Ahcy(0), Arsa(-0.02), Arsb(-0.08), Adsl(-0.16), Agl(-0.17), Alad(-0.2), Aacs(-0.29), Mapt(-0.3), Stat1(-0.34), Suox(-0.51), Cubn(-0.53), Serpinc1(-0.56), Gatm(-0.79),
metanephros development	0.0216082	0.212348	3.82393e-05	0.000620599	39	0.0724273	0.0740822	0.233044	0.00885272	0.00225946	Gdnf(0.72), Gdnf(0.72), Id3(0.53), Pax8(0.4), Pax8(0.4), Nkx3-1(0.27), Rdh10(0.11), Wt1(0.08), Foxc2(0.06), Irx2(-0.01), Irx3(-0.02), Gli3(-0.03), Hoxd11(-0.03), Hoxa11(-0.04), Spry1(-0.05), Bcl2(-0.06), Irx1(-0.07), Nf1(-0.09), Aph1c(-0.09), Pax2(-0.1), Pax2(-0.1), Gdf11(-0.11), Osr2(-0.11), Aph1a(-0.12), Robo2(-0.13), Lhx1(-0.14), Bmp4(-0.15), Bmp4(-0.15), Fbn1(-0.27), Itga8(-0.29), Itga8(-0.29…
delayed rectifier potassium channel activity	0.0246297	0.293043	3.95832e-05	0.000639477	21	0.0169937	0.512769	0.00273562	0.0381626	0.0143699	Kcna7(0.49), Kcns3(0.37), Kcnq4(0.31), Kcnc2(0.16), Kcnc2(0.16), Kcna1(0.11), Kcna1(0.11), Kcnh2(0.06), Kcnh1(-0.03), Kcnh1(-0.03), Kcnc3(-0.11), Kcnq1(-0.16), Kcnq1(-0.16), Kcnf1(-0.34), Kcng2(-0.51), Kcna5(-0.52), Kcna5(-0.52), Kcnb1(-0.58), Kcnb1(-0.58), Kcnb1(-0.58), Kcne1(-1.12),
vocalization behavior	0.0270496	0.411722	4.27679e-05	0.000679241	10	0.0226421	0.0877859	0.0156535	0.325664	0.002383	Nrxn2(0.27), Shank3(0.19), Shank3(0.19), Myh14(0.13), Dlg4(-0.29), Srpx2(-0.5), Shank1(-0.67), Shank1(-0.67), Shank2(-0.87), Shank2(-0.87),
DNA metabolic process	0.0233673	0.343486	4.2768e-05	0.000679241	15	0.0248301	0.0141778	0.0599716	0.171728	0.0167332	Top2b(-0.01), Dnase2a(-0.02), Helq(-0.02), Mms19(-0.03), Ercc4(-0.09), Mus81(-0.12), Wrn(-0.19), Wrn(-0.19), Smarcal1(-0.2), Fancm(-0.22), Fen1(-0.25), Parp1(-0.34), Tk1(-0.41), Top2a(-0.45), Rad51(-0.51),
peptide hormone binding	0.0343674	0.278894	4.28125e-05	0.000679241	21	0.0567707	0.0248383	0.0220765	0.0224484	0.111233	Inhba(0.54), Mas1(0.32), Hcrtr1(0.2), Ednrb(0.06), Anxa5(0.04), Oxtr(0.04), Npr2(-0.02), Galr3(-0.08), Avpr1a(-0.08), Slc40a1(-0.09), Slc40a1(-0.09), Lepr(-0.24), Npr1(-0.24), Ghr(-0.3), Ghr(-0.3), Agtr1a(-0.31), Npr3(-0.33), Pth1r(-0.49), Ide(-0.56), Gcgr(-0.65), Prlr(-0.82),
lactate transmembrane transporter activity	0.022354	0.389345	4.35878e-05	0.000687981	13	0.00303292	0.0283206	0.0549846	0.00879792	0.439913	Slc16a3(0.51), Slc16a3(0.51), Slc16a1(0.07), Slc16a1(0.07), Slc16a4(-0.11), Slc16a11(-0.17), Slc16a12(-0.24), Slc16a6(-0.39), Slc16a13(-0.48), Slc16a5(-0.54), Slc16a7(-0.74), Slc16a7(-0.74), Slc5a12(-0.96),
chondrocyte differentiation	0.0254377	0.203607	4.37523e-05	0.000687981	40	0.0499207	0.110174	0.000907245	0.190862	0.0282734	Arid5a(0.53), Col11a2(0.45), Sox9(0.41), Runx1(0.28), Tgfb1(0.26), Wnt7a(0.22), Mef2d(0.12), Bmp2(0.11), Bmpr1a(0.11), Runx3(0.02), Runx2(0), Runx2(0), Fgfr1(-0.03), Snx19(-0.09), Snx19(-0.09), Mustn1(-0.1), Creb3l2(-0.1), Nfib(-0.11), Osr2(-0.11), Prkca(-0.14), Bmp4(-0.15), Gpld1(-0.15), Nov(-0.15), Mapk14(-0.17), Mapk14(-0.17), Ift80(-0.21), Ift80(-0.21), Cytl1(-0.23), Hspg2(-0.24), Fgf9(-0.25)…
peroxisomal matrix	0.0237315	0.3233	4.53152e-05	0.000709404	16	0.0505503	0.00126037	0.0828307	0.0357337	0.183077	Hspd1(0.28), Prdx1(0.14), Acot8(0.07), Prdx5(0.05), Gnpat(-0.04), Pex7(-0.15), Mlycd(-0.19), Acox3(-0.19), Scp2(-0.2), Abcd3(-0.22), Lonp2(-0.32), Lonp2(-0.32), Paox(-0.33), Mvd(-0.37), Ide(-0.56), Ide(-0.56),
synapse	0.0219629	0.0751918	4.72184e-05	0.000735941	340	0.00252904	0.551558	0.00296211	0.0722983	0.0324398	Syt5(1.57), Syt5(1.57), Nrgn(1.19), Syn1(1), Syn1(1), Chrnb4(0.95), Hspb1(0.9), Pcdh8(0.77), Arc(0.61), Plat(0.57), Il31ra(0.54), Adgrv1(0.44), Sh2d5(0.43), Sema4c(0.42), Stx1a(0.42), Shc4(0.42), Unc13a(0.41), Dscaml1(0.39), Dok7(0.39), Syt11(0.38), Ptprn(0.37), Musk(0.36), Prrt1(0.36), Znrf1(0.35), Cpeb1(0.34), Itga5(0.33), Tmem163(0.32), Chrnb1(0.31), Rims3(0.3), Brsk1(0.3), Bcl2l1(0.28), Grin3…
steroid hormone receptor activity	0.0224591	0.195274	4.92434e-05	0.000757492	47	0.111215	0.0224231	0.00460093	0.0484663	0.111738	Nr4a1(0.77), Nr5a2(0.57), Nr4a2(0.32), Nr4a3(0.27), Nr1d1(0.25), Rxrb(0.17), Nr1h2(0.16), Rora(0.15), Paqr8(0.13), Ppard(0.11), Paqr5(0.1), Rorb(0.09), Nr2c2(0.08), Nr6a1(0.05), Rarg(0.04), Nr1d2(0.03), Rxra(0.01), Rarb(-0.01), Rara(-0.06), Nr1h3(-0.07), Nr3c1(-0.13), Nr1h4(-0.13), Nr2c1(-0.13), Abhd2(-0.13), Nr2f2(-0.15), Nr2f6(-0.15), Esrrb(-0.15), Nr2f1(-0.18), Thra(-0.21), Rorc(-0.24), Thrb(-…
aminoacyl-tRNA ligase activity	0.0137566	0.277043	5.26186e-05	0.000802887	38	0.432352	0.000102737	0.000998692	0.236922	0.162938	Lars2(0.18), Cars(0.13), Aars(0.09), Hars(0.08), Gars(0.07), Nars(0.06), Rars(0.06), Hars2(0.05), Yars(0.05), Tars(0.05), Sars(0.04), Wars(0.03), Farsa(0.03), Yars2(0.01), Kars(0.01), Vars(-0.01), Wars2(-0.01), Mars(-0.01), Dars(-0.01), Lars(-0.02), Farsb(-0.03), Dalrd3(-0.03), Aars2(-0.03), Eprs(-0.04), Iars(-0.05), Pars2(-0.06), Ears2(-0.08), Fars2(-0.1), Iars2(-0.1), Cars2(-0.11), Sars2(-0.11)…
sodium channel regulator activity	0.0356194	0.2644	5.26703e-05	0.000802887	23	0.0156102	0.0911916	0.0217456	0.0215925	0.126566	Fxyd5(0.28), Ywhah(0.25), Ywhah(0.25), Fgf12(0.21), Sgk1(0.14), Nedd4l(0.14), Sgk3(-0.03), Fxyd2(-0.04), Sclt1(-0.11), Gpld1(-0.15), Ptpn3(-0.15), Sgk2(-0.17), Fxyd1(-0.17), Snta1(-0.3), Fxyd4(-0.31), Cav3(-0.32), Gpd1l(-0.32), Scn1b(-0.33), Prss8(-0.38), Prss8(-0.38), Nos1(-0.56), Scn4b(-1.08), Scn2b(-1.67),
BBSome	0.0303237	0.324056	5.33771e-05	0.000807044	16	0.0860044	0.0319816	0.00304002	0.0229179	0.240233	Bbip1(0.11), Bbip1(0.11), Bbs5(0.03), Bbs5(0.03), Bbs4(0.01), Bbs4(0.01), Bbs2(-0.06), Bbs2(-0.06), Bbs7(-0.2), Bbs7(-0.2), Bbs9(-0.25), Bbs9(-0.25), Bbs1(-0.26), Bbs1(-0.26), Ttc8(-0.42), Ttc8(-0.42),
regulation of cytosolic calcium ion concentration	0.0231342	0.277961	5.60883e-05	0.000841786	24	0.000165705	0.274123	0.09484	0.0157708	0.162171	Plcd1(0.22), Cln3(0.2), Hcrtr1(0.2), Pde6a(0.19), Trpc1(0.16), Trpc1(0.16), Slc8b1(0.13), Slc8b1(0.13), Tmem64(-0.03), Cul5(-0.06), Slc35g1(-0.06), Cav1(-0.12), Tmem178(-0.13), Fxyd1(-0.17), Fkbp1b(-0.21), Fkbp1b(-0.21), Asph(-0.29), Pvalb(-0.42), Calb1(-0.56), Calb1(-0.56), Atp2b2(-0.62), Atp2b2(-0.62), Trpc3(-1.62), Ryr1(-1.79),
positive regulation of natural killer cell differentiation	0.0323886	0.401258	5.61508e-05	0.000841786	10	0.0291796	0.206419	0.00820104	0.125399	0.00874309	Irf1(-0.03), Il15ra(-0.05), Stat5b(-0.05), Zbtb1(-0.05), Axl(-0.15), Stat5a(-0.23), Rasgrp1(-0.35), Il15(-0.43), Il15(-0.43), Gas6(-0.53),
pyridine nucleotide biosynthetic process	0.0241555	0.405162	5.67574e-05	0.000847289	10	0.210409	0.00725288	0.215857	0.0176034	0.00640724	Nmnat2(0.22), Nmnat3(0.11), Aspdh(0.08), Haao(-0.13), Naprt(-0.2), Kmo(-0.26), Nmrk1(-0.35), Nampt(-0.43), Qprt(-0.46), Kynu(-1.2),
sex differentiation	0.0339046	0.399439	6.24057e-05	0.000927695	10	0.0733138	0.246629	0.0365675	0.0223666	0.00411118	Bax(0.01), Stat5b(-0.05), Tcf21(-0.16), Srd5a1(-0.16), Cntfr(-0.27), Pbx1(-0.27), Hnf4a(-0.39), Dmrt2(-0.39), Srd5a2(-0.73), Wnt4(-0.98),
oxidoreductase activity, acting on paired donors, with incorporation or reduction of molecular oxygen	0.0304031	0.191542	6.34183e-05	0.000938803	45	0.145158	0.0151236	0.0579138	0.00322423	0.147108	Cyp2b10(1.19), Cyp27b1(0.73), Cyp3a13(0.49), Cyp4a12a(0.38), Plod2(0.35), Cyp2e1(0.23), Cyp4f18(0.17), Cyp4b1(0.16), Plod3(0.16), Egln2(0.11), P4ha2(0.1), Cyp2d9(0.08), P3h1(0.06), Cyp20a1(0.05), Ogfod2(0.03), Cyp51(0.01), Cyp4f14(0.01), Ogfod3(-0.03), Ogfod1(-0.03), Cyp2j6(-0.04), Cyp4v3(-0.04), Egln1(-0.05), Cyp7b1(-0.06), Cyp39a1(-0.07), Cyp2r1(-0.09), Plod1(-0.1), Cyp27a1(-0.1), Cyp1b1(-0.11)…
sodium-independent organic anion transmembrane transporter activity	0.00476811	0.375639	6.43758e-05	0.000949006	20	0.0582816	0.000339146	0.648246	0.00179405	0.144054	Slco1a1(0.44), Slco4a1(0.2), Slc22a22(0.2), Slc22a28(0.13), Slco2a1(0.06), Slc22a30(0.04), Slco1a4(0), Slc22a29(-0.04), Slco3a1(-0.09), Slco1a6(-0.2), Slc22a6(-0.24), Slc22a6(-0.24), Slc22a8(-0.25), Slc22a12(-0.25), Slco4c1(-0.33), Slc22a19(-0.41), Slco2b1(-0.5), Slco2b1(-0.5), Slc22a26(-0.67), Gm6614(-1.22),
positive regulation of cholesterol esterification	0.0262537	0.419083	6.53894e-05	0.000956712	11	0.00950828	0.0552479	0.00293313	0.0423868	0.447114	Apoa1(0.51), Apoa1(0.51), Apoe(-0.01), Apoe(-0.01), Apoa2(-0.06), Agtr1a(-0.31), Apoa4(-0.33), Apoa4(-0.33), Agt(-0.42), Stard4(-0.55), Scd1(-0.74),
retinal ganglion cell axon guidance	0.0330434	0.337042	6.54393e-05	0.000956712	14	0.0596202	0.117716	0.00284596	0.0597886	0.0685752	Rpl24(0.28), Efna5(0.26), Ptprm(0.03), Ephb3(0.01), Ephb2(-0.07), Robo2(-0.13), Ephb1(-0.15), Nrp1(-0.23), Bmpr1b(-0.3), Slit2(-0.44), Slit2(-0.44), Slit2(-0.44), Epha7(-0.59), Nrcam(-0.68),
phosphate ion transport	0.030278	0.381303	6.57625e-05	0.00095748	11	0.0446426	0.142582	0.221338	0.00226902	0.0147767	Ank(0.23), Ip6k2(0.17), Slc20a1(0.11), Slc20a2(0.07), Slc34a1(-0.07), Slc34a3(-0.27), Slc34a3(-0.27), Slc25a10(-0.34), Slc34a2(-0.63), Slc34a2(-0.63), Slc34a2(-0.63),
COPI vesicle coat	0.0356888	0.330892	6.74446e-05	0.000977946	17	0.00665475	0.0549961	0.0441511	0.0767723	0.0916411	Scyl1(0.06), Scyl1(0.06), Copb2(0.03), Copb2(0.03), Cope(0.03), Tmed3(0.03), Copb1(-0.02), Copb1(-0.02), Copa(-0.04), Copa(-0.04), Copz1(-0.04), Arcn1(-0.06), Copg1(-0.07), 1190002N15Rik(-0.16), 1190002N15Rik(-0.16), Copg2(-0.19), Copz2(-0.36),
Golgi transport complex	0.0352205	0.299334	6.90583e-05	0.000997258	18	0.0585074	0.00212292	0.139415	0.0762578	0.0567753	Cog2(0.1), Cog2(0.1), Cog3(0.06), Cog3(0.06), Cog1(0.02), Golga3(0.01), Scfd1(-0.02), Cog4(-0.1), Cog4(-0.1), Cog8(-0.11), Cog8(-0.11), Dnajc28(-0.13), Cog6(-0.16), Cog6(-0.16), Cog7(-0.18), Cog7(-0.18), Cog5(-0.21), Cog5(-0.21),
structural constituent of muscle	0.0274798	0.345079	7.38119e-05	0.00106019	15	0.038422	0.204262	0.00212895	0.00467222	0.332662	Jph1(0.35), Myl6(0.12), Myl6(0.12), Myl6b(0.07), Nexn(0.06), Krt19(-0.04), Synm(-0.09), Dag1(-0.12), Dmd(-0.29), Pdlim3(-0.45), Pdlim3(-0.45), Myh11(-0.55), Ttn(-0.73), Ttn(-0.73), Mylpf(-1.06),
fatty acid biosynthetic process	0.026051	0.164589	7.40156e-05	0.00106019	64	0.038008	0.00498795	0.0276736	0.00712984	0.592244	Ptgs2(1.16), Ch25h(0.35), Prkab2(0.28), Msmo1(0.21), Ptges3(0.19), Elovl6(0.16), Prkab1(0.15), Hacd1(0.14), Fa2h(0.13), Ptges(0.12), Prkag1(0.11), Acsm3(0.08), Degs1(0.06), Hacd3(0.06), Sc5d(0.04), Hacd2(0.03), Elovl7(0.02), Acly(0.02), Acly(0.02), Prkaa1(0.02), Mecr(-0.01), Elovl1(-0.01), Acsm1(-0.03), Mcat(-0.03), Fads3(-0.04), Elovl5(-0.05), Lpl(-0.06), Cbr4(-0.06), Nr1h3(-0.07), Acsf3(-0.07),…
mitochondrial proton-transporting ATP synthase complex, coupling factor F(o)	0.0136419	0.423201	7.50781e-05	0.00107107	12	0.00728905	0.111681	0.0379289	0.000127365	0.731224	Atp5g2(0.26), Atp5l(0.14), Atp5j(-0.04), Atp5j2(-0.05), Atp5g3(-0.05), Atp5k(-0.06), Atp5h(-0.06), Atp5o(-0.1), Atp5f1(-0.12), Atp5f1(-0.12), Atp5g1(-0.31), Atp5g1(-0.31),
cytochrome-c oxidase activity	0.0173845	0.286644	7.88423e-05	0.00112026	29	0.00486186	0.144391	0.0168526	0.000643538	0.705202	AA467197(1.05), Cox6a1(0.07), Cox7c(0.06), Cox7a2l(0.06), COX1(0.05), Cox4i1(0.04), Cox8a(0.04), Ndufa4(0.04), Ndufa4(0.04), Surf1(0.04), Cox6c(0.02), Cox5a(0.01), Cox5a(0.01), Cox7a1(-0.01), Cox5b(-0.03), Cox7a2(-0.03), Coa6(-0.03), Cox6b1(-0.06), Cox7b(-0.08), Cox10(-0.16), Cox15(-0.21), Cox15(-0.21), Cox4i2(-0.23), Cox4i2(-0.23), Cox4i2(-0.23), Cox6b2(-0.25), Cox6a2(-0.36), Ndufa4l2(-0.89), Co…
HOPS complex	0.0284989	0.340563	7.98838e-05	0.00113052	15	0.0472202	0.000785691	0.444808	0.0169873	0.0886303	Vps16(0.06), Vps16(0.06), Vps18(0.03), Vps18(0.03), Stx17(0.01), Vps39(0), Hook2(-0.06), Vps11(-0.07), Vps11(-0.07), Aktip(-0.1), Hook1(-0.14), Vps33a(-0.17), Hook3(-0.17), Vps41(-0.23), Vps41(-0.23),
Z disc	0.0302274	0.139869	8.19079e-05	0.00115454	89	0.0101894	0.391236	0.00323067	0.0171074	0.160671	Hspb1(0.9), Pde4b(0.64), Bag3(0.41), Jph1(0.35), Fbxo32(0.31), Actn1(0.3), Bin1(0.26), Fhl3(0.25), Fkbp1a(0.19), Myl12a(0.19), Cryab(0.18), Fhl2(0.18), Cfl2(0.16), Dnajb6(0.15), Synpo(0.15), Capzb(0.14), Capzb(0.14), Ppp1r12a(0.14), Ppp3ca(0.14), Homer1(0.12), Vcl(0.11), Pak1(0.1), Grk3(0.1), Krt8(0.07), Krt8(0.07), Scn5a(0.07), Nexn(0.06), Nexn(0.06), Hdac4(0.06), Ppp2r5a(0.06), Ppp2r5a(0.06), S…
negative regulation of peptidase activity	0.030026	0.199627	8.37176e-05	0.00117537	56	0.0358634	0.0217252	0.0559217	0.0162743	0.192681	Ngp(1.26), Pi15(1.15), Kng1(0.89), Serpine1(0.8), Slpi(0.8), Pzp(0.75), Serpina3m(0.57), Serpinb1a(0.42), Cast(0.33), Serpina3n(0.32), Serpinb6a(0.27), Ngf(0.25), Cstb(0.24), Timp1(0.21), Wfdc2(0.19), Lxn(0.17), Serpine2(0.17), Spint1(0.08), Itih2(0.07), Spint2(0.06), Ecm1(0.05), Itih1(0.03), Fetub(0.03), Cst3(0.02), App(0), Spink8(-0.03), Pebp1(-0.04), Serpini1(-0.07), Col7a1(-0.09), Serpinf2(-0…
oxidoreductase activity, acting on the CH-CH group of donors, with a flavin as acceptor	0.00942542	0.4003	8.512e-05	0.00118576	14	0.0333176	0.000221847	0.0194712	0.138606	0.536497	Acadl(0), Ivd(0), Acox1(-0.05), Acad8(-0.1), Acadsb(-0.11), Etfa(-0.12), Gcdh(-0.15), Acadvl(-0.18), Acad9(-0.18), Acox3(-0.19), Acad10(-0.21), Acad11(-0.24), Acadm(-0.29), Acox2(-0.39),
lipid catabolic process	0.0293452	0.153055	8.52457e-05	0.00118576	70	0.0789942	0.00186387	0.0238741	0.0998664	0.202816	Liph(0.5), Acap1(0.43), Aspg(0.35), Pnpla2(0.34), Plcd1(0.22), Neu3(0.21), Pla2g12a(0.2), Abhd4(0.2), Pld2(0.18), Tbl1xr1(0.14), Apob(0.11), Pafah1b2(0.1), Pafah1b3(0.1), Plcg1(0.09), Pla2g7(0.08), Pafah1b1(0.07), Plce1(0.07), Ddhd2(0.06), Pla2g6(0.05), Pnpla8(0.05), Rab7(0.03), Plbd2(0.01), Prdx6(0), Plcb3(0), Pnpla6(-0.01), Iah1(-0.01), Plcd3(-0.02), Pld3(-0.04), Lpl(-0.06), Cyp39a1(-0.07), Ado…
negative regulation of TORC1 signaling	0.0356173	0.32839	8.54634e-05	0.00118576	15	0.00332181	0.0223489	0.0734281	0.132066	0.132382	Sesn1(0.18), Sesn1(0.18), Gatsl3(0.09), Stk11(0.08), Sesn2(-0.11), Sesn2(-0.11), Depdc5(-0.11), Tsc2(-0.17), Sesn3(-0.25), Sesn3(-0.25), Gatsl2(-0.31), Atm(-0.51), Atm(-0.51), Rnf152(-0.54), Rnf152(-0.54),
steroid hormone mediated signaling pathway	0.0275826	0.194279	8.58765e-05	0.00118684	44	0.136845	0.0216884	0.0533119	0.0149757	0.066467	Nr4a1(0.77), Nr5a2(0.57), Nr4a2(0.32), Nr4a3(0.27), Nr1d1(0.25), Rxrb(0.17), Nr1h2(0.16), Rora(0.15), Ppard(0.11), Rorb(0.09), Nr2c2(0.08), Nr6a1(0.05), Rarg(0.04), Nr1d2(0.03), Rxra(0.01), Rarb(-0.01), Rara(-0.06), Nr1h3(-0.07), Bmp7(-0.09), Nr3c1(-0.13), Nr1h4(-0.13), Nr2c1(-0.13), Abhd2(-0.13), Nr2f2(-0.15), Bmp4(-0.15), Nr2f6(-0.15), Esrrb(-0.15), Nr2f1(-0.18), Thra(-0.21), Rorc(-0.24), Thrb(…
hexosaminidase activity	0.0318131	0.275576	8.81574e-05	0.00121362	21	0.0754558	0.00174478	0.0819158	0.157481	0.0512908	Ace(0.14), Edem1(0.14), Man1b1(0.1), Man1a(0.01), Man1a2(0.01), Man2a2(-0.04), Man2c1(-0.05), Man2b1(-0.06), Hexdc(-0.06), Hexdc(-0.06), Edem2(-0.07), Edem3(-0.1), Pgghg(-0.11), Hexb(-0.15), Man2b2(-0.15), Glb1l(-0.18), Ctbs(-0.22), Man1c1(-0.22), Ganc(-0.37), Glb1l2(-0.48), AI464131(-0.56),
peptidase inhibitor activity	0.0281443	0.204109	9.75414e-05	0.00132831	57	0.0342641	0.0260182	0.058745	0.0127605	0.221584	Ngp(1.26), Pi15(1.15), Wfdc21(0.95), Kng1(0.89), Serpine1(0.8), Slpi(0.8), Pzp(0.75), Serpina3m(0.57), Serpinb1a(0.42), Cast(0.33), Serpina3n(0.32), Serpinb6a(0.27), Ngf(0.25), Cstb(0.24), Timp1(0.21), Wfdc2(0.19), Lxn(0.17), Serpine2(0.17), Spint1(0.08), Itih2(0.07), Spint2(0.06), Itih1(0.03), Fetub(0.03), Cst3(0.02), App(0), Spink8(-0.03), Pebp1(-0.04), Serpini1(-0.07), Col7a1(-0.09), Serpinf2(…
T/G mismatch-specific endonuclease activity	0.0240051	0.18144	9.76148e-05	0.00132831	48	0.0638967	5.64839e-05	0.0697348	0.142174	0.345513	Zc3h12a(0.21), Eri1(0.18), Pelo(0.15), Zc3h12c(0.12), Rbbp8(0.11), Endou(0.08), Dbr1(0.08), Harbi1(0.08), Rexo1(0.07), Isg20l2(0.07), Apex1(0.05), Ercc5(0.05), Mgme1(0.05), Dclre1c(0.04), Aen(0.03), Tsn(0.02), Dclre1b(0.02), Rexo2(0.01), Rexo4(0), Iah1(-0.01), Apex2(-0.03), Ercc4(-0.09), Slx1b(-0.1), Smg6(-0.11), Pgap1(-0.13), 4931406C07Rik(-0.15), Rida(-0.16), Exo5(-0.16), Eri3(-0.16), Gdpd5(-0.…
retroviral 3' processing activity	0.0240051	0.18144	9.76148e-05	0.00132831	48	0.0638967	5.64839e-05	0.0697348	0.142174	0.345513	Zc3h12a(0.21), Eri1(0.18), Pelo(0.15), Zc3h12c(0.12), Rbbp8(0.11), Endou(0.08), Dbr1(0.08), Harbi1(0.08), Rexo1(0.07), Isg20l2(0.07), Apex1(0.05), Ercc5(0.05), Mgme1(0.05), Dclre1c(0.04), Aen(0.03), Tsn(0.02), Dclre1b(0.02), Rexo2(0.01), Rexo4(0), Iah1(-0.01), Apex2(-0.03), Ercc4(-0.09), Slx1b(-0.1), Smg6(-0.11), Pgap1(-0.13), 4931406C07Rik(-0.15), Rida(-0.16), Exo5(-0.16), Eri3(-0.16), Gdpd5(-0.…
antigen processing and presentation of exogenous peptide antigen via MHC class II	0.0101118	0.410683	0.00010419	0.00141236	14	0.055409	0.96674	0.00929033	0.00118758	0.000843319	Fcer1g(0.45), Ifi30(0.02), Unc93b1(0), H2-Aa(-0.03), Traf6(-0.04), Cd74(-0.05), H2-Eb1(-0.06), Fcgr2b(-0.18), H2-Ab1(-0.21), H2-DMa(-0.47), H2-DMa(-0.47), Ctse(-0.53), Ctse(-0.53), H2-DMb1(-0.69),
lipase activity	0.022052	0.275287	0.00010574	0.00142789	23	0.0332202	0.00057097	0.108228	0.0690165	0.316754	Liph(0.5), Ces1e(0.09), Ddhd2(0.06), Ces1f(0.02), Plbd2(0.01), Prdx6(0), Lypla1(-0.02), Ces2b(-0.07), Plbd1(-0.11), Ldah(-0.11), Ddhd1(-0.11), Lipa(-0.16), Daglb(-0.19), Pla1a(-0.2), Dagla(-0.22), Pnpla7(-0.25), Lipe(-0.26), Ache(-0.29), Aadac(-0.29), Nceh1(-0.32), Ces2g(-0.35), Abhd15(-0.38), Ces1g(-1.26),
determination of left/right symmetry	0.0346117	0.164695	0.000109012	0.00146648	57	0.00628378	0.0156931	0.021114	0.145567	0.297271	Tgif1(0.49), Cited2(0.27), Arl13b(0.2), Dnaaf3(0.2), Lefty1(0.19), Pitx2(0.17), Stil(0.16), Kif3a(0.14), Axin1(0.13), Nek8(0.13), Gas8(0.11), Pkd2(0.05), Ift74(0.04), Foxf1(0.03), Notch1(0.03), Acvr2a(0.02), Alg5(0.01), Disp1(0.01), Pskh1(0.01), Mks1(0.01), Acvr1(0), Foxj1(0), Notch2(0), Pcsk5(0), Dpcd(-0.01), Dll1(-0.03), Daam2(-0.06), Tmem67(-0.08), Ift88(-0.1), Nme7(-0.1), Nphp3(-0.11), Nphp3(…
acylglycerol lipase activity	0.0177992	0.444183	0.000117768	0.00157827	11	0.00124588	0.0810348	0.0174007	0.0752801	0.400356	Abhd12(0.01), Abhd12(0.01), Abhd6(-0.08), Abhd6(-0.08), Abhd6(-0.08), Abhd2(-0.13), Faah(-0.21), Lipe(-0.26), Mgll(-0.26), Mgll(-0.26), Mgll(-0.26),
tRNA aminoacylation for protein translation	0.0160845	0.280378	0.000123134	0.00164396	34	0.479277	0.00025532	0.000578472	0.279415	0.201375	Lars2(0.18), Cars(0.13), Hars(0.08), Gars(0.07), Nars(0.06), Rars(0.06), Yars(0.05), Tars(0.05), Sars(0.04), Wars(0.03), Yars2(0.01), Kars(0.01), Vars(-0.01), Wars2(-0.01), Mars(-0.01), Dars(-0.01), Lars(-0.02), Aimp1(-0.03), Dalrd3(-0.03), Eprs(-0.04), Iars(-0.05), Pars2(-0.06), Mrpl39(-0.08), Ears2(-0.08), Iars2(-0.1), Cars2(-0.11), Sars2(-0.11), Tars2(-0.12), Mars2(-0.12), Dars2(-0.14), Tarsl2…
lysosome organization	0.0305218	0.200005	0.000124837	0.00166042	42	0.0186369	0.000652774	0.260433	0.238254	0.0619802	Cln3(0.2), Fam160a2(0.2), Tpcn2(0.16), Cln8(0.09), Lamtor1(0.08), Cln5(0.08), Mfsd8(0.06), Becn1(0.03), Vps18(0.03), Vps18(0.03), Zkscan3(-0.01), Zkscan3(-0.01), Snapin(-0.02), Lyst(-0.03), Chmp5(-0.03), Gaa(-0.05), Gaa(-0.05), Mbtps1(-0.06), Hook2(-0.06), Vps11(-0.07), Hexa(-0.08), Hexa(-0.08), Aktip(-0.1), Abca1(-0.11), Hps4(-0.11), Hps4(-0.11), Ppt1(-0.12), Gnptab(-0.12), Tmem106b(-0.14), Hook…
response to stilbenoid	0.0272323	0.392133	0.000129847	0.0017206	15	0.140346	0.00312377	0.075224	0.00434003	0.385286	Saa3(2.67), Hba-a1(1.48), Slco1a1(0.44), Cyp2a4(0.26), Slc22a7(0.24), Cd36(-0.02), Gsta1(-0.17), Gsta2(-0.22), Cyp2a5(-0.24), Usp18(-0.3), Apoa4(-0.33), Idi1(-0.35), Ifit3(-0.72), Ly6d(-0.95), Cidea(-2.04),
hydrolase activity, acting on glycosyl bonds	0.0324896	0.159315	0.000134501	0.00177561	61	0.0225905	0.00172416	0.0595328	0.412202	0.0751038	Chil3(1.73), Neu3(0.21), Smug1(0.18), Hyal3(0.18), Lyz2(0.15), Mgea5(0.15), Gla(0.13), Treh(0.11), Ogg1(0.1), Man1b1(0.1), Gba(0.06), Mogs(0.06), Mutyh(0.06), Gba2(0.04), Cd38(0.02), Tdg(0.02), Man1a(0.01), Man1a2(0.01), Macrod2(0), Man2a1(-0.01), Hyal1(-0.02), Ung(-0.02), Fuca1(-0.02), Neil1(-0.02), Gusb(-0.04), Man2a2(-0.04), Manea(-0.04), Neil2(-0.04), Gaa(-0.05), Man2c1(-0.05), Macrod1(-0.05)…
anion transport	0.0268233	0.265596	0.000135967	0.00178829	24	0.342903	0.0161279	0.00177383	0.0975733	0.0832276	Slc37a1(0.28), Lrrc8a(0.24), Slc4a8(0.08), Vdac3(0.04), Slc22a18(0.02), Slco1a4(0), Slc4a7(-0.01), Slc37a3(-0.02), Slc4a2(-0.05), Vdac1(-0.13), Slc37a2(-0.15), Vdac2(-0.16), Slc4a9(-0.18), Slc4a3(-0.22), Slc4a11(-0.23), Slc22a6(-0.24), Slc4a4(-0.26), Slc26a6(-0.31), Slc26a7(-0.32), Slc26a7(-0.32), Kcnn4(-0.36), Slc17a9(-0.59), Slc37a4(-0.61), Slc4a1(-1.71),
branched-chain amino acid catabolic process	0.0278432	0.415139	0.00014013	0.00183622	10	0.00765099	0.0500446	0.0188765	0.0351873	0.433761	Bckdha(-0.02), Hibadh(-0.02), Auh(-0.08), Acad8(-0.1), Hibch(-0.11), Bcat2(-0.16), Bcat2(-0.16), Bckdhb(-0.24), Bckdk(-0.24), Bcat1(-0.67),
muscle contraction	0.0401223	0.243842	0.000146386	0.00191111	27	0.0144356	0.198255	0.0106412	0.0564182	0.119687	Drd1(0.57), Stac(0.4), Chrnb1(0.31), Fkbp1a(0.19), Lmod1(0.19), Tmod3(0.16), Col4a3bp(0.15), Myl6(0.12), Myl6b(0.07), Hsbp1(0.06), Ndufs6(0), Taz(-0.01), Slmap(-0.06), Tmod1(-0.17), Tpm2(-0.19), Acta2(-0.24), Tmod2(-0.26), Trim63(-0.28), Myom1(-0.31), Myom2(-0.39), Tnnt2(-0.51), Tnnt2(-0.51), Mybpc2(-0.55), Ttn(-0.73), Ryr1(-1.79), Ryr1(-1.79), Myh4(-2.4),
helicase activity	0.0304559	0.149738	0.000155179	0.00201351	116	0.286434	0.00139049	0.0730877	0.0929859	0.0414755	Chd5(0.32), Eif4a1(0.26), Chd7(0.26), Gtf2f2(0.24), Ddx28(0.23), Chd1(0.21), Anxa1(0.2), Ddx31(0.2), Ighmbp2(0.19), Chd2(0.19), Dhx40(0.17), Ruvbl2(0.16), Ddx54(0.15), Smarca5(0.15), Ddx21(0.14), Ddx52(0.13), Ddx3x(0.12), Ttf2(0.11), Rad54l2(0.11), Dhx8(0.11), Ddx27(0.11), Setx(0.1), Eif4a2(0.08), Ddx39(0.08), Ddx5(0.07), Ddx47(0.07), Chd1l(0.07), Dhx33(0.07), Ddx6(0.06), Upf1(0.06), Helz2(0.06),…
cellular response to organic substance	0.0403954	0.253663	0.000155367	0.00201351	24	0.0446516	0.0616094	0.365717	0.00443405	0.0312406	Nr4a1(0.77), Il1b(0.74), Egr1(0.48), Casp3(0.28), Iqgap3(0.19), Bax(0.01), Cd68(0.01), Egr2(0.01), Casp1(0), Cyba(-0.01), Bad(-0.04), Mapk1(-0.05), Bcl2(-0.06), Satb2(-0.1), Psap(-0.17), Map2(-0.23), Syp(-0.33), Timp2(-0.34), Timp3(-0.41), Ccnd1(-0.53), Calb1(-0.56), Cux2(-0.78), Il5ra(-1.25), Slc6a4(-1.29),
regulation of protein kinase A signaling	0.0423795	0.351954	0.00015688	0.0020257	12	0.0190133	0.0409725	0.130049	0.0278521	0.114206	Pde10a(0.31), Aip(0.08), Akap11(-0.05), Akap11(-0.05), Pja2(-0.08), Pja2(-0.08), Akap6(-0.17), Akap7(-0.25), Akap7(-0.25), Pde4a(-0.27), Akap1(-0.38), Lrrk2(-0.61),
complement activation, classical pathway	0.0301342	0.311112	0.000160694	0.0020674	16	0.0585072	0.0713491	0.00223295	0.345336	0.0383918	Cd55(0.44), C1qc(0.03), Cr1l(0.03), C1qb(-0.02), C8g(-0.02), C1qa(-0.05), C1qbp(-0.13), Cfi(-0.16), C1ra(-0.21), C2(-0.25), C1s1(-0.27), C3(-0.34), Serping1(-0.39), C1rl(-0.43), C8a(-0.46), Mbl1(-0.55),
gluconeogenesis	0.013816	0.272027	0.000163929	0.00210138	29	0.0193462	0.0655438	0.0363423	0.000825141	0.686684	Atf3(0.85), Atf4(0.45), Crtc2(0.21), Cry1(0.14), Pgk1(0.1), Gapdh(0.09), G6pc3(0.08), G6pc3(0.08), Fbp1(-0.05), Fbp1(-0.05), Pgam1(-0.08), Gpi1(-0.09), Pck1(-0.12), Pck1(-0.12), Tpi1(-0.12), Pck2(-0.12), Bpgm(-0.14), Gpd2(-0.17), Pcx(-0.18), Fbp2(-0.35), Fbp2(-0.35), Pgam2(-0.38), Pgam2(-0.38), Gpd1(-0.61), Per2(-0.66), G6pc(-0.67), G6pc(-0.67), Rbp4(-0.8), Rbp4(-0.8),
phospholipase activity	0.0320243	0.249441	0.000176392	0.00225298	25	0.0188832	0.00188486	0.0363629	0.47682	0.122454	Liph(0.5), Ces1e(0.09), Ddhd2(0.06), Ces1f(0.02), Plbd2(0.01), Prdx6(0), Sec23ip(-0.03), Ces2b(-0.07), Pla2g4a(-0.08), Abhd6(-0.08), Plbd1(-0.11), Ldah(-0.11), Ddhd1(-0.11), Daglb(-0.19), Pla1a(-0.2), Dagla(-0.22), Pnpla7(-0.25), Napepld(-0.26), Ache(-0.29), Nceh1(-0.32), Ces2g(-0.35), Abhd15(-0.38), Lipg(-0.43), Lipg(-0.43), Ces1g(-1.26),
voltage-gated potassium channel activity	0.0358502	0.232059	0.000178456	0.00227114	33	0.227339	0.333929	0.00232906	0.0494559	0.0100034	Kcna7(0.49), Kcne4(0.43), Kcns3(0.37), Kcnq4(0.31), Kcnc2(0.16), Kcna1(0.11), Kcna1(0.11), Kcnab1(0.1), Kcnt1(0.09), Kcnh2(0.06), Kcnh2(0.06), Kcnh7(0.05), Kcnh7(0.05), Kcnd1(0), Kcnh1(-0.03), Kcnk2(-0.07), Hcn2(-0.11), Hcn2(-0.11), Kcnc3(-0.11), Kcnk5(-0.13), Kcnq1(-0.16), Kcnq1(-0.16), Hcn3(-0.21), Hcn3(-0.21), Kcnab2(-0.24), Kcnd3(-0.31), Kcnf1(-0.34), Kcna5(-0.52), Kcnma1(-0.54), Kcnma1(-0.54…
hydrolase activity, hydrolyzing O-glycosyl compounds	0.0400379	0.224891	0.000180487	0.00228875	31	0.0140195	0.011289	0.128854	0.0249217	0.342417	Chil3(1.73), Chil1(1.27), Ovgp1(0.47), Gla(0.13), Gba2(0.04), Gne(0), Man2a1(-0.01), Gusb(-0.04), Man2a2(-0.04), Gaa(-0.05), Man2c1(-0.05), Man2b1(-0.06), Naga(-0.06), Hexdc(-0.06), Hexa(-0.08), Abhd10(-0.08), Gbe1(-0.11), Glb1(-0.14), Hexb(-0.15), Man2b2(-0.15), Ganab(-0.16), Idua(-0.17), Glb1l(-0.18), Chid1(-0.22), Ctbs(-0.22), Lctl(-0.22), Manba(-0.24), Ganc(-0.37), Kl(-0.42), Glb1l2(-0.48), A…
Golgi organization	0.0335728	0.152577	0.000183008	0.00231243	85	0.0559088	0.00186566	0.582975	0.00885304	0.0941187	Vmp1(0.48), Tjap1(0.26), Optn(0.25), Csnk1d(0.2), Surf4(0.19), Nsfl1c(0.19), Nsfl1c(0.19), Nploc4(0.18), Hace1(0.17), Tmed2(0.13), Tbc1d20(0.13), Tbc1d20(0.13), Cdc42(0.12), Gorasp2(0.12), Arhgap21(0.12), Clasp2(0.11), Tmed9(0.1), Cog2(0.1), Cog2(0.1), Arl1(0.09), Golph3(0.08), Uso1(0.07), Rab43(0.06), Bag5(0.06), Cog3(0.06), Golga5(0.05), Golga5(0.05), Atl2(0.05), Csnk1a1(0.04), Atl3(0.04), Arhg…
2 iron, 2 sulfur cluster binding	0.0256239	0.280645	0.000192253	0.00242061	23	0.023728	0.00333488	0.196915	0.035803	0.277684	Xdh(0.27), Glrx5(0.18), Fdx1l(0.1), Fech(0.04), Fxn(0.03), Isca2(0.01), Fdx1(0), Iscu(0), Aifm3(0), Cisd2(-0.02), Cisd1(-0.04), Glrx2(-0.08), Ciapin1(-0.09), Sdhb(-0.1), Uqcrfs1(-0.12), Ndufv2(-0.13), Rfesd(-0.17), Isca1(-0.24), Cisd3(-0.27), Ndufs1(-0.29), Cmah(-0.33), Aox1(-0.51), Aox3(-1.06),
early endosome	0.0427507	0.101577	0.000197609	0.00247923	185	0.00960206	0.0754706	0.122624	0.170153	0.021195	Cxcr4(0.48), Rhob(0.39), Hfe(0.39), Trf(0.37), Trf(0.37), Hspd1(0.28), Rabgef1(0.28), P2ry2(0.26), Ldlrap1(0.24), Ldlrap1(0.24), Gja1(0.23), Map2k1(0.22), Pcsk9(0.22), Snx1(0.21), Cln3(0.2), Cln3(0.2), Siah2(0.19), Sdccag3(0.19), Ptpn23(0.19), Fzd5(0.18), Siah1a(0.17), Plekhj1(0.17), Fam109a(0.17), Arf6(0.16), Flot1(0.15), Ptpn1(0.14), Ptpn1(0.14), Dysf(0.14), Rab31(0.14), Rab11fip5(0.12), Vps4a(…
amylase activity	0.0414663	0.270797	0.000198768	0.00248495	20	0.072105	0.00357756	0.128614	0.201852	0.0357967	Ace(0.14), Edem1(0.14), Man1b1(0.1), Man1a(0.01), Man1a2(0.01), Man2a2(-0.04), Man2c1(-0.05), Man2b1(-0.06), Edem2(-0.07), Edem3(-0.1), Pgghg(-0.11), Man2b2(-0.15), Glb1l(-0.18), Ctbs(-0.22), Man1c1(-0.22), Ganc(-0.37), Mgam(-0.48), Glb1l2(-0.48), AI464131(-0.56), Amy1(-0.62),
nucleoside diphosphate kinase activity	0.0407609	0.298744	0.000201316	0.00250794	17	0.224763	0.2881	0.00510422	0.0121363	0.037918	Nme2(0.13), Nme2(0.13), Cmpk1(0.09), Nme1(0), Nme1(0), Ak7(0), Nme7(-0.1), Pck1(-0.12), Nme6(-0.14), Nme6(-0.14), Ak5(-0.24), Nme4(-0.4), Nme4(-0.4), Nme5(-0.54), Ak1(-0.57), Ak4(-0.57), Cmpk2(-0.81),
flavonoid glucuronidation	0.0173305	0.417835	0.000203035	0.00252048	12	0.163576	3.18435e-05	0.0388228	0.179413	0.402735	Ugt2b38(0.08), Ugt3a2(-0.09), Ugt8a(-0.15), Ugt1a6a(-0.15), Ugt2b37(-0.18), Ugt2b34(-0.25), Ugt3a1(-0.28), Ugt1a10(-0.67), Ugt1a1(-0.77), Ugt1a1(-0.77), Ugt1a2(-1.04), Ugt1a2(-1.04),
postsynaptic density	0.0430138	0.0913041	0.000204155	0.00252553	180	0.0103521	0.267872	0.0259799	0.207836	0.0134244	Nrgn(1.19), Cdk5r1(1.12), Syn1(1), Pde4b(0.64), Nefm(0.5), Sh2d5(0.43), Sema4c(0.42), Syt11(0.38), Clstn3(0.38), Rtn4(0.35), Cpeb1(0.34), Entpd1(0.33), Homer3(0.27), Dbn1(0.27), Map1b(0.22), Map1b(0.22), Src(0.22), Cnn3(0.22), ND2(0.21), Arrb2(0.21), Fyn(0.2), Shank3(0.19), Cryab(0.18), Il1r1(0.18), Myd88(0.18), Rgs19(0.18), Neto2(0.18), Ifngr1(0.17), Ywhaz(0.17), Camk2g(0.16), Dst(0.14), Axin1(0…
receptor clustering	0.0316091	0.224617	0.000241953	0.00298269	32	0.190713	0.263895	0.0026511	0.262212	0.00204259	Cacna1a(0.49), Dok7(0.39), Dok7(0.39), Musk(0.36), Musk(0.36), Musk(0.36), Itgb2(0.16), Pak1(0.1), Flna(0.08), Dvl1(0.05), Dlg3(0.05), Grik5(0.01), Dlg1(-0.01), Itgb1bp1(-0.02), Pick1(-0.03), Pick1(-0.03), Pigr(-0.03), Itga4(-0.07), Cdk5(-0.17), Itgal(-0.21), Syngap1(-0.21), Magi2(-0.24), Dlg4(-0.29), Itgb7(-0.32), Agrn(-0.4), Agrn(-0.4), Agrn(-0.4), Agrn(-0.4), Lrp4(-0.49), Dlg2(-0.5), Dlg2(-0.5…
neuron projection extension	0.0552881	0.248512	0.000245159	0.00301171	23	0.0229557	0.0704636	0.0447758	0.11308	0.0780543	Kdm1a(0.27), Kdm1a(0.27), Impact(0.24), Eif2ak4(0.1), Iqgap1(0.09), Usp9x(0.04), Ndel1(0.03), Plxna1(0.02), Jade2(-0.04), Bdnf(-0.09), Ddr1(-0.1), Flrt3(-0.13), Prkcz(-0.18), Tiam1(-0.21), Plxna3(-0.27), Aurka(-0.39), Sema5a(-0.44), Sema5a(-0.44), Emx1(-0.61), Postn(-0.71), Flrt1(-0.9), Sema5b(-1.44), Sema5b(-1.44),
inner ear morphogenesis	0.0355153	0.204128	0.000263674	0.003208	45	0.0268362	0.296121	0.328156	0.00085765	0.0440387	Pax8(0.4), Kcnq4(0.31), Spry2(0.3), Spry2(0.3), Nr4a3(0.27), Chd7(0.26), Chd7(0.26), Foxi1(0.21), Fzd3(0.21), Fzd6(0.18), Tfap2a(0.18), Insig1(0.09), Fgfr2(0.08), Abr(0.07), Bcr(0.07), Insig2(0), Mafb(-0.01), Dll1(-0.03), Fgfr1(-0.03), Ephb2(-0.07), Pax2(-0.1), Pax2(-0.1), Frzb(-0.12), Frzb(-0.12), Gata2(-0.13), Ntn1(-0.13), Hmx2(-0.18), Hmx2(-0.18), Ror2(-0.19), Sobp(-0.2), Celsr1(-0.23), Fgf9(-…
mammary gland alveolus development	0.043718	0.26127	0.000263857	0.003208	21	0.0452279	0.12796	0.053116	0.00578469	0.217292	Socs2(0.38), Socs2(0.38), Agap2(0.16), Tgfa(0.14), Vegfa(0.06), Phb2(0.03), Hoxa5(0.02), Chuk(-0.07), Chuk(-0.07), Ddr1(-0.1), Tnfrsf11a(-0.1), Areg(-0.28), Id2(-0.4), Esr1(-0.45), Egf(-0.47), Ccnd1(-0.53), Ccnd1(-0.53), Ar(-0.55), Erbb4(-0.63), Prlr(-0.82), Prlr(-0.82),
cilium morphogenesis	0.031063	0.17359	0.000265271	0.0032093	64	0.0223258	0.0443495	0.00208709	0.30621	0.252677	Ift43(0.31), Ahi1(0.19), Ptpn23(0.19), Wwtr1(0.17), Stil(0.16), Kif3a(0.14), Actr3(0.14), Ptpdc1(0.09), Ofd1(0.08), Ofd1(0.08), Tctn1(0.08), Unc119b(0.06), Ift57(0.05), Trove2(0.04), Dynll1(0.04), Dynll1(0.04), Ift74(0.04), Wdr19(0.04), Wdr19(0.04), Wdr19(0.04), Atmin(0.04), Atmin(0.04), Pqbp1(0.03), Dnm2(0.01), Cfap20(0.01), Bbs4(0.01), Mks1(0.01), Foxj1(0), Foxj1(0), Poc1a(0), Mkks(-0.03), Ttll…
ATPase activity	0.0252271	0.1039	0.000265778	0.0032093	160	0.291607	0.00116249	0.170499	0.0597372	0.0501538	Hspa1a(1.78), Hsp90aa1(0.65), Kif1a(0.62), Kif22(0.53), Abcb1b(0.39), Kif23(0.36), Entpd1(0.33), Kif3c(0.31), Hspa5(0.3), Eif4a1(0.26), Myo9b(0.26), Atp13a3(0.2), Tor1b(0.19), Dnah17(0.19), Kif7(0.18), Vcp(0.17), Vcp(0.17), Ruvbl2(0.16), Abcg1(0.15), Smarca5(0.15), Kif3a(0.14), Atp5l(0.14), Kif2a(0.13), Wrnip1(0.13), Ddx3x(0.12), Ralbp1(0.12), Ralbp1(0.12), Rhobtb3(0.12), Vps4a(0.12), Vps4b(0.11)…
myofibril	0.0440524	0.268452	0.000278877	0.00335601	22	0.0255589	0.271083	0.122464	0.00977968	0.0484564	Ankrd2(1), Kcnj8(0.29), Ankrd1(0.24), Lmod1(0.19), Psma6(0.12), Arhgef25(0.09), Twf1(0.02), Tpm1(-0.03), Sco1(-0.03), Syne2(-0.03), Ablim2(-0.1), Tmod1(-0.17), Tmod1(-0.17), Pde4dip(-0.23), Pde4dip(-0.23), Actg1(-0.27), Tnnt2(-0.51), Tnnt2(-0.51), Ttn(-0.73), Neb(-0.88), Nrap(-1.14), Myh4(-2.4),
glucose metabolic process	0.0311319	0.171374	0.000291281	0.0034934	55	0.00480867	0.00225787	0.055077	0.225498	0.535478	Pdk4(0.64), Cacna1a(0.49), H6pd(0.32), Hk2(0.22), Pgm1(0.22), Myc(0.18), Igf2(0.15), Pgm2l1(0.13), Akt1(0.11), Pkm(0.08), Usf1(0.08), Brat1(0.08), G6pdx(0.05), Inppl1(0.05), Oma1(0.04), Akt2(0.03), Cpt1a(0.03), Prkaa1(0.02), Pik3ca(0.01), Serp1(0), Pdk3(0), Aimp1(-0.03), Wdtc1(-0.08), Apod(-0.1), Pdha1(-0.11), Pgm2(-0.11), Pgm2(-0.11), Pck1(-0.12), Tpi1(-0.12), Tcf7l2(-0.13), Gdpgp1(-0.14), Gdpgp…
neuronal cell body	0.0468824	0.0665096	0.000292304	0.00349382	400	0.00932989	0.401599	0.0117577	0.068239	0.0911658	Syt5(1.57), Arg1(1.48), Tac1(1.42), Gal(1.34), Vgf(1.21), Nrgn(1.19), Cdk5r1(1.12), Glrx(0.9), Calca(0.84), Calca(0.84), Hdc(0.82), Hsp90aa1(0.65), Kif1a(0.62), Slc12a5(0.61), Drd1(0.57), Uchl1(0.55), Slc38a2(0.53), Cacna1a(0.49), Ncf1(0.48), Crmp1(0.47), Camk2d(0.42), Ccr1(0.4), Plk3(0.37), Ptprn(0.37), Penk(0.36), Penk(0.36), Rtn4(0.35), Rtn4(0.35), Cpeb1(0.34), Gfra1(0.34), Entpd1(0.33), Csnk1…
cellular response to cAMP	0.0454989	0.235805	0.000294369	0.00350666	27	0.0110586	0.0542775	0.0444046	0.0981406	0.212492	Zfp36l1(0.31), Zfp36l1(0.31), Rap1b(0.26), Ezr(0.23), Pik3cg(0.1), Rapgef1(0.07), Ahr(0.06), Itpr3(0.06), Rap1a(0.05), Rapgef2(-0.02), Rapgef2(-0.02), Rapgef2(-0.02), Hcn2(-0.11), Inpp5k(-0.15), Kcnq1(-0.16), Akap6(-0.17), Rapgef3(-0.18), Aqp1(-0.21), Igfbp5(-0.31), Slc26a6(-0.31), Itpr2(-0.32), Cftr(-0.35), Itpr1(-0.44), Gpd1(-0.61), Dmtn(-0.84), Slc8a1(-0.84), Adipoq(-3.04),
complement activation	0.0524802	0.376362	0.000301224	0.00357628	10	0.0173009	0.0371856	0.0322288	0.283361	0.0882431	Rgcc(0.38), Cfb(-0.11), C1ra(-0.21), C2(-0.25), C1s1(-0.27), Masp1(-0.3), C3(-0.34), C3(-0.34), C8a(-0.46), C4b(-0.6),
SWI/SNF complex	0.0433382	0.288488	0.000302819	0.00358318	21	0.110992	0.0257989	0.0374084	0.252012	0.020175	Smarcd2(0.07), Smarcd1(0.05), Smarcc1(0.03), Smarcc1(0.03), Smarcc1(0.03), Actl6a(0.03), Smarce1(0.02), Smarce1(0.02), Smarcb1(-0.01), Smarcb1(-0.01), Smarcc2(-0.01), Smarcc2(-0.01), Smarca4(-0.02), Smarca4(-0.02), Smarca4(-0.02), Arid1a(-0.03), Arid1a(-0.03), Smarcd3(-0.08), Smarca2(-0.16), Smarca2(-0.16), Arid1b(-0.16),
cell morphogenesis involved in neuron differentiation	0.0455031	0.376514	0.000306102	0.00360996	10	0.0148516	0.130665	0.084983	0.0172349	0.190249	Hes1(0.01), Spr(-0.04), Unk(-0.05), Unk(-0.05), Hexa(-0.08), Rb1(-0.12), Mycbp2(-0.13), Mef2c(-0.29), Id2(-0.4), Slc1a3(-0.75),
alpha-mannosidase activity	0.0565593	0.374163	0.000323647	0.00380134	10	0.0240982	0.0473773	0.219913	0.0771877	0.0372128	Man2a1(-0.01), Man2a2(-0.04), Manea(-0.04), Man2c1(-0.05), Man2c1(-0.05), Man2b1(-0.06), Man2b1(-0.06), Man2b1(-0.06), Man2b2(-0.15), Man2b2(-0.15),
superoxide dismutase activity	0.0257945	0.413296	0.000324478	0.00380134	11	0.138532	0.0214517	0.467818	0.00275706	0.0486666	Sod1(0.14), Sod1(0.14), Sod1(0.14), Sod1(0.14), Ccs(-0.15), Sod2(-0.18), Sod2(-0.18), Sod2(-0.18), Nqo1(-0.19), Sod3(-0.26), Sod3(-0.26),
protein import into peroxisome matrix	0.039004	0.34818	0.00033903	0.00395871	13	0.0707291	0.00402386	0.431905	0.022247	0.0972378	Pex5(0.02), Pex5(0.02), Pex12(0.02), Pex12(0.02), Pex16(0.01), Pex26(-0.06), Pex14(-0.08), Pex2(-0.09), Pex7(-0.15), Pex7(-0.15), Pex10(-0.21), Pex10(-0.21), Pex1(-0.34),
calcium channel activity	0.0483942	0.165549	0.000342673	0.00398808	58	0.0171331	0.360911	0.117471	0.0264195	0.0230006	Trpv2(0.62), Trpv2(0.62), Trpm6(0.59), Cacna1a(0.49), Grin3b(0.28), Cacnb3(0.24), Pkd1l3(0.22), Psen1(0.18), Trpc1(0.16), Tpcn2(0.16), Slc24a3(0.12), Dennd5a(0.11), Trpv6(0.11), Trpv6(0.11), Trpv6(0.11), Cacna2d1(0.1), Mcu(0.1), Mcu(0.1), Itpr3(0.06), Pkd2(0.05), Pkd2(0.05), Orai1(0.04), Cacnb2(0.03), Panx1(0.03), Cacng7(0.02), Pkd1(0), Pkd1(0), Trpm4(-0.02), Dennd5b(-0.02), Trpc6(-0.04), Cacna1c…
oxidoreductase activity, acting on paired donors, with incorporation or reduction of molecular oxygen, reduced flavin or flavoprotein as one donor, and incorporation of one atom of oxygen	0.0277954	0.362982	0.000349845	0.0040582	12	0.0562263	0.158795	0.578134	0.000192419	0.050527	Cyp2b10(1.19), Cyp3a13(0.49), Cyp2e1(0.23), Cyp2d9(0.08), Cyp2j6(-0.04), Cyp1b1(-0.11), Cyp1b1(-0.11), Cyp2j5(-0.21), Cyp2d26(-0.26), Cyp2f2(-0.38), Cyp2s1(-0.59), Cyp2u1(-0.65),
regulation of ossification	0.0311132	0.292316	0.000353536	0.00408762	17	0.138343	0.44665	0.000794432	0.255083	0.00562688	Creb3l1(0.11), P3h1(0.06), Mapk3(0.03), Egr2(0.01), Acvr1(0), Runx2(0), Ptger4(-0.04), Mapk1(-0.05), Csf1(-0.13), Intu(-0.13), Mapk14(-0.17), Pbx1(-0.27), Fgfr3(-0.3), Esrra(-0.35), Dhrs3(-0.59), Rsad2(-0.62), Sfrp1(-0.67),
regulation of cardiac muscle contraction	0.0529851	0.372497	0.000359247	0.0041268	10	0.112007	0.273154	0.0338858	0.0392267	0.0154699	Smad7(0.02), P2rx4(0), Gja5(-0.01), Adora1(-0.08), Adra1b(-0.31), Cav3(-0.32), Adra1a(-0.33), Agrn(-0.4), Ehd3(-0.53), Ank2(-0.57),
GPI-anchor transamidase activity	0.0552994	0.206629	0.000361158	0.0041268	33	0.0412082	0.0250355	0.0468459	0.128297	0.146133	Mblac1(0.27), Aptx(0.22), Abhd4(0.2), Dcp1a(0.16), Abhd17b(0.16), Ndst2(0.15), Dcp1b(0.1), Hint1(0.07), Abhd17a(0.04), Dffb(0.01), Abhd11(0), Abhd13(-0.01), Pigu(-0.04), Hint2(-0.05), Ndst1(-0.08), Fahd2a(-0.09), Pigt(-0.09), Pigs(-0.1), Pigk(-0.11), Pigk(-0.11), Mest(-0.13), Abhd14a(-0.13), Abhd16a(-0.13), Nudt13(-0.14), Gpaa1(-0.16), Rbbp9(-0.16), Hint3(-0.17), Lactb2(-0.18), Mblac2(-0.21), Abh…
phosphotransferase activity, alcohol group as acceptor	0.0544279	0.263108	0.000361252	0.0041268	20	0.0626962	0.0832458	0.0140074	0.218977	0.0473525	Hk3(0.33), Hk2(0.22), Pomk(0.09), Pomk(0.09), Fuk(0.01), Adpgk(-0.01), Fam20b(-0.01), Hkdc1(-0.07), Adk(-0.09), Hk1(-0.13), Fggy(-0.13), Galk1(-0.15), Gk5(-0.19), Mvk(-0.2), Galk2(-0.23), Rbks(-0.26), Gk(-0.39), Xylb(-0.46), Shpk(-0.48), G6pc(-0.67),
transmembrane receptor protein tyrosine kinase activity	0.0379251	0.184438	0.000361591	0.0041268	44	0.0317508	0.598952	0.0432103	0.0839699	0.00211244	Epha2(0.43), Musk(0.36), Tyro3(0.24), Egfr(0.23), Flt4(0.23), Erbb3(0.22), Flt1(0.19), Kit(0.12), Fgfr2(0.08), Ryk(0.06), Flt3(0.04), Kdr(0.04), Mertk(0.04), Erbb2(0.03), Ephb3(0.01), Ntrk3(0.01), Ret(0), Fgfr1(-0.03), Met(-0.03), Ror1(-0.04), Igf1r(-0.05), Fgfr4(-0.06), Ephb2(-0.07), Ddr1(-0.1), Nptn(-0.1), Insr(-0.11), Ephb4(-0.15), Axl(-0.15), Ror2(-0.19), Csf1r(-0.2), Tie1(-0.21), Ntrk2(-0.27…
proton-transporting ATP synthase activity, rotational mechanism	0.0343693	0.396104	0.000366538	0.00416981	12	0.00406246	0.162693	0.0474124	0.0123064	0.498887	Atp5g2(0.26), Atp5e(0.05), Atp6ap1(0.03), Atp5d(0.03), Atp5g3(-0.05), Atp5b(-0.06), Atp5c1(-0.06), Atp5h(-0.06), Atp5o(-0.1), Atp5f1(-0.12), Atp5a1(-0.14), Atp5g1(-0.31),
mitochondrial respiratory chain complex IV assembly	0.0512989	0.326473	0.000375672	0.00426002	13	0.047453	0.0605795	0.0136691	0.204703	0.0995293	Cox17(0.09), Surf1(0.04), Pet100(0.01), Coa4(-0.01), Sco1(-0.03), Cox14(-0.04), Cox19(-0.13), Coa3(-0.14), Coa3(-0.14), Timm21(-0.27), Timm21(-0.27), Bcs1l(-0.35), Cox20(-0.47),
adenylate cyclase-modulating G-protein coupled receptor signaling pathway	0.0446087	0.274791	0.000395611	0.0044718	19	0.0929986	0.438404	0.00219313	0.0577497	0.0544162	Gnao1(0.22), P2ry12(0.2), Calcr(0.15), Gnai3(0.13), Adcy4(0.06), Gnai2(0.04), Prkacb(-0.02), Ptger4(-0.04), Gna12(-0.07), Gnai1(-0.09), Gnat1(-0.12), Ptger3(-0.19), Gnaz(-0.27), Gnaz(-0.27), Cacna1d(-0.34), Pth1r(-0.49), Gcgr(-0.65), Gcgr(-0.65), Oxgr1(-0.68),
embryonic limb morphogenesis	0.0477142	0.171992	0.000401631	0.00452539	47	0.0450706	0.224855	0.0487538	0.224872	0.00425536	Chst11(0.52), Wnt7a(0.22), Zbtb16(0.21), Psen1(0.18), Pbx2(0.15), Ptch1(0.09), Ptch1(0.09), Twist1(0.07), Dicer1(0.05), Wdr19(0.04), Notch1(0.03), Psen2(0.03), Notch2(0), Gja5(-0.01), Ski(-0.01), Hoxc10(-0.02), Fgfr1(-0.03), Gli3(-0.03), Gli3(-0.03), Hoxd11(-0.03), Hoxa11(-0.04), Lrp6(-0.05), Hoxa10(-0.07), Lmx1b(-0.07), Mbnl1(-0.08), Bmp7(-0.09), Bmp7(-0.09), Megf8(-0.11), Acd(-0.11), C2cd3(-0.1…
ATP hydrolysis coupled proton transport	0.0301217	0.249182	0.000437096	0.00490936	29	0.00168964	0.189959	0.0589563	0.00750713	0.641555	Atp6v1b2(0.26), Atp5g2(0.26), Atp6v0a1(0.17), Atp6v0c(0.09), Atp6v0e(0.07), Atp6v0b(0.05), Atp6v1g3(0.05), Atp6v0a2(0.04), Atp6ap1(0.03), Atp6v0d1(0.01), Atp6v1f(0.01), Atp6v1h(0.01), Atp5g3(-0.05), Atp5b(-0.06), Atp6v1c1(-0.06), Atp6v1e1(-0.09), Atp6v0e2(-0.11), Atp5a1(-0.14), Atp6v1a(-0.22), Atp6v0d2(-0.28), Atp1a1(-0.29), Atp5g1(-0.31), Atp6v0a4(-0.32), Atp6v0a4(-0.32), Atp1a3(-0.46), Atp4a(-0…
ATP synthesis coupled proton transport	0.0265412	0.327786	0.000456889	0.00510293	18	0.00551005	0.108707	0.1862	0.00113107	0.620417	Atp5g2(0.26), Atp6v0a1(0.17), Atp5l(0.14), Atp5e(0.05), Atp6v0a2(0.04), Atp5d(0.03), Atp5j(-0.04), Atp5g3(-0.05), Atp5b(-0.06), Atp5c1(-0.06), Atp5k(-0.06), Atp5h(-0.06), Tcirg1(-0.09), Atp5o(-0.1), Atp5f1(-0.12), Atp5a1(-0.14), Atp5g1(-0.31), Atp6v0a4(-0.32),
protein import into mitochondrial matrix	0.0627255	0.281478	0.000458172	0.00510293	17	0.143326	0.077921	0.036739	0.100735	0.0313928	Grpel2(0.18), Tomm7(0.18), Dnlz(0.08), Tomm22(0.02), Grpel1(0), Tomm40l(0), Tomm40(-0.04), Timm17a(-0.06), Timm44(-0.06), Timm50(-0.08), Timm17b(-0.09), Tomm20(-0.24), Timm21(-0.27), Timm21(-0.27), Timm23(-0.28), Pam16(-0.36), Pam16(-0.36),
drug binding	0.0563985	0.138683	0.000458658	0.00510293	72	0.153472	0.0151235	0.0726804	0.0239882	0.21483	Chrnb4(0.95), Drd1(0.57), Adrb2(0.54), Cxcr4(0.48), Pnp2(0.48), Fntb(0.41), Hsp90ab1(0.4), Pnp(0.35), Alb(0.34), Pde10a(0.31), Htr1b(0.29), Htr1b(0.29), Pde3b(0.28), Fkbp1a(0.19), Folr2(0.19), Tlr8(0.19), Fscn1(0.18), Fscn1(0.18), Cyp4b1(0.16), Ace(0.14), Ppp3ca(0.14), Nme2(0.13), Gstp2(0.12), Ppard(0.11), Chka(0.1), Eef1a1(0.09), Pde2a(0.07), Fnta(0.06), Gstp1(0.06), Srp54b(0.04), Chrm3(0.03), P…
proximal/distal pattern formation	0.0489506	0.239036	0.000465702	0.0051403	24	0.0168454	0.228426	0.0351448	0.12044	0.0603539	Pbx2(0.15), Hoxa9(0.03), Apc(0.01), Chsy1(-0.01), Hoxc10(-0.02), Ctnnb1(-0.03), Dll1(-0.03), Gli3(-0.03), Gli3(-0.03), Hoxd11(-0.03), Hoxa11(-0.04), Hoxa10(-0.07), Hoxd9(-0.09), Hoxd9(-0.09), Grem1(-0.18), Hoxd10(-0.26), Pbx1(-0.27), Pbx1(-0.27), Aldh1a2(-0.33), Gli2(-0.47), Cyp26b1(-0.48), Lrp4(-0.49), Hoxc11(-0.77), Trp63(-0.92),
carbohydrate transport	0.0632427	0.211755	0.000467828	0.0051403	30	0.0943141	0.0469441	0.040714	0.0860486	0.0965027	Slc2a3(0.5), Slc37a1(0.28), Slc2a1(0.25), Pea15a(0.18), Akt1(0.11), Slc35b1(0.09), Slc35c1(0.09), Slc35a2(0.04), Akt2(0.03), Slc5a2(0), Slc37a3(-0.02), Slc35a5(-0.06), Rft1(-0.07), Slc35a1(-0.08), Slc5a11(-0.09), Slc35a4(-0.12), Slc50a1(-0.15), Slc37a2(-0.15), Mfsd4b3(-0.21), Slc35d2(-0.28), Slc2a8(-0.31), Slc35a3(-0.31), Mfsd4b1(-0.35), Slc35b4(-0.38), Slc2a12(-0.62), Slc2a4(-0.63), Slc2a10(-0.6…
steroid hydroxylase activity	0.0184926	0.33895	0.000476456	0.00520278	20	0.186102	0.00248961	0.377053	0.000817529	0.411148	Cyp2b10(1.19), Cyp2b10(1.19), Ch25h(0.35), Cyp2j13(0.31), Cyp2a4(0.26), Cyp2e1(0.23), Cyp2d9(0.08), Cyp2d12(0.01), Cyp2j6(-0.04), Cyp2j9(-0.06), Cyp2c44(-0.06), Cyp2r1(-0.09), Cyp2d22(-0.11), Cyp2j11(-0.16), Cyp2j5(-0.21), Cyp2a5(-0.24), Cyp2d26(-0.26), Cyp2f2(-0.38), Cyp2s1(-0.59), Cyp2u1(-0.65),
glucosidase activity	0.0500159	0.275002	0.000487167	0.00530337	19	0.0930257	0.00465632	0.117349	0.287418	0.04436	Ace(0.14), Edem1(0.14), Man1b1(0.1), Man1a(0.01), Man1a2(0.01), Man2a2(-0.04), Man2c1(-0.05), Man2b1(-0.06), Edem2(-0.07), Edem3(-0.1), Pgghg(-0.11), Man2b2(-0.15), Ganab(-0.16), Glb1l(-0.18), Ctbs(-0.22), Man1c1(-0.22), Ganc(-0.37), Glb1l2(-0.48), AI464131(-0.56),
anatomical structure formation involved in morphogenesis	0.052835	0.301788	0.000497844	0.00540299	15	0.00653808	0.183214	0.162738	0.0737115	0.0613273	Nog(0.78), Nog(0.78), Grb2(0.19), Gli3(-0.03), Bmp7(-0.09), Lhx1(-0.14), Lhx1(-0.14), Bmp4(-0.15), Gata3(-0.26), Foxa1(-0.28), Trps1(-0.34), Hoxa1(-0.44), Gli2(-0.47), Trp63(-0.92), Gata5(-1.12),
serine-type endopeptidase activity	0.0302791	0.139799	0.00051971	0.00562304	92	0.0285227	0.27129	0.0362437	0.121536	0.0315691	Mmp8(1.67), Mmp9(1.42), F10(1.06), Htra4(0.63), Plat(0.57), Plat(0.57), Klk1b9(0.4), Ctsc(0.34), Klk8(0.31), Klk8(0.31), St14(0.29), Mmp19(0.28), Prss22(0.27), Klk1(0.22), Rhbdd1(0.22), Pcsk9(0.22), Pcsk9(0.22), Pcsk9(0.22), Hgf(0.16), Hgfac(0.16), Prss27(0.16), Klk1b5(0.11), Klk1b5(0.11), Klk1b5(0.11), Corin(0.11), Corin(0.11), F5(0.1), Pcsk4(0.07), Tpp2(0.07), Tmprss2(0.06), Prep(0.05), Prss23(…
anion transmembrane transporter activity	0.056832	0.309696	0.000533353	0.00575305	14	0.271231	0.0769533	0.0100003	0.0492447	0.096185	Slc4a8(0.08), Slc26a11(0.02), Slc26a4(0.01), Slc4a7(-0.01), Slc4a2(-0.05), Abca1(-0.11), Slc4a9(-0.18), Slc4a3(-0.22), Slc4a11(-0.23), Slc4a4(-0.26), Slc26a6(-0.31), Slc26a7(-0.32), Slc1a2(-0.75), Slc4a1(-1.71),
intercalated disc	0.0331873	0.184553	0.000551057	0.00592595	53	0.0151368	0.415552	0.00617889	0.105058	0.122685	Camk2d(0.42), Kcnj2(0.27), Cxadr(0.26), Ywhah(0.25), Gja1(0.23), Gja1(0.23), Itgb1(0.22), Tmem65(0.22), Tmem65(0.22), Capzb(0.14), Capzb(0.14), Ptk2(0.14), Pkp2(0.14), Pkp2(0.14), Vcl(0.11), Pak1(0.1), Tjp1(0.1), Dsc2(0.08), Ctnna1(0.07), Scn5a(0.07), Scn5a(0.07), Xirp1(0.05), Anxa5(0.04), Gja5(-0.01), Ctnnb1(-0.03), Fhod1(-0.04), Dsg2(-0.07), Jup(-0.07), Vamp5(-0.09), Des(-0.11), Slc9a1(-0.11), …
mitochondrial fission	0.053391	0.265525	0.000589749	0.00632282	19	0.0512153	0.0226663	0.164181	0.00658526	0.435629	Mtfr1(0.11), Mief1(0.09), Mul1(0.04), Dnm1l(0.02), Dnm1l(0.02), Dnm2(0.01), Fis1(0), Fis1(0), Mff(-0.01), Mtfr1l(-0.09), Cox10(-0.16), Ggnbp1(-0.2), Opa1(-0.21), Mtfr2(-0.24), Dnm1(-0.33), Mtfp1(-0.49), Mtfp1(-0.49), Ppp2r2b(-0.57), Dnm3(-0.59),
ATP-dependent DNA helicase activity	0.0347477	0.279209	0.000593518	0.006344	24	0.286637	0.00812659	0.0313754	0.185567	0.0633106	Ruvbl2(0.16), Ddx3x(0.12), Mcm6(0.02), Ruvbl1(0.02), Mre11a(0), Ercc2(-0.01), Ddx11(-0.02), Ercc3(-0.03), Mcm4(-0.03), Nbn(-0.03), Nbn(-0.03), Mcm7(-0.04), Rad50(-0.05), Rad50(-0.05), Gtf2h4(-0.06), Rtel1(-0.06), Rtel1(-0.06), Blm(-0.07), Fbxo18(-0.13), Wrn(-0.19), Xrcc6(-0.21), Xrcc5(-0.21), Helb(-0.22), Brip1(-0.24),
receptor binding	0.0470685	0.0782493	0.000612203	0.00652402	305	0.363421	0.102145	0.2127	0.0116008	0.00548636	Fgb(1.88), Hspa1a(1.78), Fgg(1.46), Tac1(1.42), Tnfsf14(1.25), Il6(1.08), Fga(1.06), Apln(0.98), Kng1(0.89), Calca(0.84), Calca(0.84), Serpine1(0.8), Wnt11(0.8), Edn1(0.76), Il1b(0.74), Hilpda(0.74), Lif(0.73), Ucn2(0.64), Ucn2(0.64), Ntf5(0.63), Syk(0.6), Drd1(0.57), Plat(0.57), Inhba(0.54), Nefm(0.5), Pvr(0.5), Tyrobp(0.47), Cdh5(0.45), Fgf21(0.43), Tmc8(0.4), Hfe(0.39), Plaur(0.39), Rnd1(0.36)…
plasma membrane lactate transport	0.0356958	0.374622	0.00062013	0.00658864	13	0.00318438	0.067263	0.068309	0.0202074	0.705871	Slc16a3(0.51), Slc16a3(0.51), Slc16a1(0.07), Slc16a1(0.07), Emb(-0.05), Slc16a4(-0.11), Slc16a11(-0.17), Slc16a12(-0.24), Slc16a6(-0.39), Slc16a13(-0.48), Slc16a5(-0.54), Slc16a7(-0.74), Slc16a7(-0.74),
neuron development	0.0555505	0.197455	0.000628852	0.00664219	34	0.146278	0.150256	0.0780211	0.210413	0.00185997	Lif(0.73), Runx1(0.28), Psen1(0.18), Skil(0.08), Secisbp2(0.05), Becn1(0.03), Mturn(0.03), Mtmr2(0.03), Pbx3(0.01), Tgfb2(0), Ski(-0.01), Thoc2(-0.02), Htt(-0.06), Ntf3(-0.07), Zbtb18(-0.07), Ccsap(-0.11), Ncam1(-0.13), Htra2(-0.14), Nr2f6(-0.15), Fig4(-0.17), Fig4(-0.17), Sod2(-0.18), Ihh(-0.19), Ndn(-0.23), Nrp1(-0.23), Hs6st1(-0.23), Ctf1(-0.24), Mef2c(-0.29), Gabrb3(-0.32), Tenm2(-0.37), Gli2…
flagellated sperm motility	0.0586702	0.221435	0.000628924	0.00664219	27	0.123714	0.0357326	0.261861	0.0101011	0.0980137	Ing2(0.17), Ccnyl1(0.15), Dnaja1(0.11), Gas8(0.11), Apob(0.11), Rabl2(0.09), Wt1(0.08), Tmf1(0), Dpcd(-0.01), Met(-0.03), Nphp4(-0.05), Pltp(-0.1), Sord(-0.11), Slirp(-0.12), Insl6(-0.14), Ttll5(-0.14), Inpp5b(-0.24), Spag6l(-0.24), Celf3(-0.24), Adcy3(-0.26), Neurl1a(-0.33), Catsper2(-0.35), Ropn1l(-0.38), Atp2b4(-0.56), Ccdc39(-0.6), Nsun7(-0.61), Catsper4(-0.68),
chloride channel complex	0.0427022	0.267396	0.000643907	0.0067566	23	0.0909505	0.474234	0.0795629	0.000638912	0.121262	Clic1(0.41), Ttyh1(0.33), Clic4(0.32), Best1(0.31), Best1(0.31), Gabrb1(0.22), Ano6(0.06), Ttyh3(-0.01), Clcn2(-0.04), Clcnkb(-0.08), Clcc1(-0.09), Ttyh2(-0.12), Fxyd1(-0.17), Clcnka(-0.31), Slc26a6(-0.31), Gabrb3(-0.32), Cftr(-0.35), Clic5(-0.35), Ano1(-0.5), Gabra3(-0.67), Gabrp(-0.82), Clic3(-0.93), Best3(-0.98),
FAD binding	0.065368	0.277492	0.000644446	0.0067566	17	0.060863	0.0821557	0.0350994	0.146626	0.0812479	Cry2(0.24), Cyb5r3(0.11), Dpyd(0.04), Cyb5r1(-0.01), Mical1(-0.04), Cyb5r4(-0.05), Coq6(-0.08), Mical3(-0.09), Mtrr(-0.09), Mical2(-0.16), Aifm1(-0.21), Oxnad1(-0.21), Kmo(-0.26), Dao(-0.34), Ddo(-0.34), Cyb5rl(-0.46), Prodh(-0.51),
GPI anchor biosynthetic process	0.0419966	0.201857	0.000645487	0.0067566	39	0.00925932	0.0221732	0.00797178	0.285197	0.558805	Pign(0.29), Pigw(0.23), Pigc(0.22), Dpm2(0.2), Dpm2(0.2), Pigm(0.2), Dpm1(0.18), Dpm1(0.18), Pigf(0.08), Pigv(0.06), Pigv(0.06), Alg5(0.01), Pigyl(-0.02), Pigu(-0.04), Pigx(-0.05), Dpm3(-0.06), Dpm3(-0.06), Pgap3(-0.08), Pigt(-0.09), Pigq(-0.1), Pigq(-0.1), Pigs(-0.1), Pigo(-0.11), Pigk(-0.11), Pgap1(-0.13), Gpaa1(-0.16), Piga(-0.16), Pyurf(-0.16), Pyurf(-0.16), Pgap2(-0.16), Pigb(-0.17), Pigb(-0…
mannosidase activity	0.0567577	0.271091	0.000652744	0.00681241	19	0.0930257	0.0102526	0.118535	0.257487	0.0431114	Ace(0.14), Edem1(0.14), Man1b1(0.1), Man1a(0.01), Man1a2(0.01), Man2a1(-0.01), Man2a2(-0.04), Man2c1(-0.05), Man2b1(-0.06), Edem2(-0.07), Edem3(-0.1), Pgghg(-0.11), Man2b2(-0.15), Glb1l(-0.18), Ctbs(-0.22), Man1c1(-0.22), Ganc(-0.37), Glb1l2(-0.48), AI464131(-0.56),
folic acid binding	0.0257888	0.307829	0.000676022	0.00703461	16	0.1133	3.20404e-05	0.175541	0.162121	0.483556	Mthfsl(0.25), Folr2(0.19), Folr2(0.19), Mthfs(0.12), Mtr(0.03), Dhfr(-0.06), Ftcd(-0.07), Dmgdh(-0.1), Folr1(-0.14), Folr1(-0.14), Gnmt(-0.17), Sardh(-0.18), Slc46a1(-0.32), Tyms(-0.41), Slc19a1(-0.43), Slc19a1(-0.43),
extracellular matrix organization	0.0330968	0.143416	0.000683026	0.00708664	79	0.098918	0.310178	0.0789843	0.100236	0.00363679	Mmp9(1.42), Mmp9(1.42), Ero1lb(0.64), Csgalnact1(0.54), Serpinb5(0.43), Sox9(0.41), Cyr61(0.4), Nfkb2(0.27), Elf3(0.23), Mmp11(0.23), Adamtsl4(0.22), Mpzl3(0.22), Olfml2b(0.22), B4galt1(0.21), Crispld2(0.19), Tfip11(0.17), Dnajb6(0.15), Ptk2(0.14), Lgals3(0.14), Smoc2(0.13), Spint1(0.08), Vhl(0.08), Gfod2(0.07), Vwa1(0.07), Vwa1(0.07), Bcl3(0.05), Spock2(0.04), Apbb1(0.03), Foxf1(0.03), Atxn1l(0.…
organic anion transmembrane transporter activity	0.00278531	0.393334	0.000685661	0.00709318	24	0.163496	7.24702e-05	0.245763	0.0103576	0.733682	Slco1a1(0.44), Slc22a7(0.24), Slc22a7(0.24), Slc22a7(0.24), Slco4a1(0.2), Mfsd10(0.19), Abcc5(0.06), Slc22a18(0.02), Slco1a4(0), Slco1a4(0), Slc22a23(0), Slco3a1(-0.09), Slc17a3(-0.11), Slc22a17(-0.17), Slc22a6(-0.24), Slc22a6(-0.24), Slc22a6(-0.24), Slc22a6(-0.24), Slc22a6(-0.24), Slc22a8(-0.25), Slco4c1(-0.33), Slc22a19(-0.41), Slc22a19(-0.41), Slco2b1(-0.5),
ATP biosynthetic process	0.0441509	0.277493	0.000697414	0.00718864	20	0.0134621	0.279885	0.0318372	0.00638647	0.497784	Tgfb1(0.26), Ldhd(0.2), Atp5l(0.14), Pkm(0.08), Atp5e(0.05), Surf1(0.04), Atp5d(0.03), Uqcc3(0.02), Aldoa(-0.01), Atp5j2(-0.05), Atp5b(-0.06), Atp5c1(-0.06), Atp5k(-0.06), Gbas(-0.1), Atp5o(-0.1), Chchd10(-0.1), Atp5a1(-0.14), Atp5s(-0.19), Slc25a13(-0.24), Pklr(-0.73),
anchored component of plasma membrane	0.0479297	0.251841	0.000700437	0.00718864	23	0.0780971	0.405741	0.213855	0.00242697	0.0302684	Mdga1(0.57), Cd48(0.41), Efna1(0.35), Prss22(0.27), Cp(0.26), Efna5(0.26), Rtn4rl2(0.24), Gpihbp1(0.21), Rgmb(0.05), Hyal2(-0.11), Hyal2(-0.11), Folr1(-0.14), Gas1(-0.24), Gas1(-0.24), Gpc3(-0.32), Car4(-0.33), Ntng2(-0.34), Prss8(-0.38), Car15(-0.43), Rtn4rl1(-0.43), Thy1(-0.48), Rhbg(-0.66), Mfi2(-0.77),
regulation of dendritic spine morphogenesis	0.060492	0.330468	0.000700984	0.00718864	12	0.088616	0.104918	0.0314294	0.146021	0.0520426	Cdk5r1(1.12), Shank3(0.19), Cfl1(0.11), Pdlim5(-0.04), Cdk5(-0.17), Sipa1l1(-0.17), Ppp1r9a(-0.18), Srcin1(-0.32), Epha4(-0.5), Dnm3(-0.59), Lrrk2(-0.61), Lrrk2(-0.61),
cell maturation	0.0267406	0.226255	0.000713996	0.00730092	33	0.120713	0.646182	0.123165	0.00242305	0.0091899	Cbfb(0.22), Fzd5(0.18), Btk(0.17), Ren1(0.13), Vegfa(0.06), Kdr(0.04), Ccl21a(0.03), Runx3(0.02), Plp1(0.02), Hes1(0.01), Runx2(0), Runx2(0), Epas1(0), Tusc2(0), Tusc2(0), Ctnnb1(-0.03), Ctnnb1(-0.03), Fgfr1(-0.03), Gdf11(-0.11), Gata2(-0.13), Pou2f2(-0.17), Sox18(-0.17), Cebpa(-0.18), Ihh(-0.19), Gata3(-0.26), Lhx6(-0.27), Angptl8(-0.27), Pparg(-0.32), Rfx3(-0.32), Id2(-0.4), Il15(-0.43), Pth1r(…
glucuronosyltransferase activity	0.0197408	0.290246	0.000727697	0.00740583	26	0.215104	2.82348e-05	0.0285565	0.230134	0.632472	Csgalnact1(0.54), Ugt2b38(0.08), Ugt2b38(0.08), B3gat3(0.07), Ext2(0.06), Ext2(0.06), Ext1(-0.02), Large1(-0.04), Large1(-0.04), Ugt3a2(-0.09), Ugt8a(-0.15), Ugt1a6a(-0.15), Ugt1a6a(-0.15), Ugt2b37(-0.18), Ugt2b37(-0.18), B4gat1(-0.22), Ugt2b34(-0.25), Ugt3a1(-0.28), Large2(-0.36), Ugt1a10(-0.67), Ugt1a10(-0.67), Ugt1a1(-0.77), Ugt1a1(-0.77), Ugt1a1(-0.77), Ugt1a2(-1.04), Ugt1a2(-1.04),
defense response to Gram-positive bacterium	0.0570374	0.185681	0.000728443	0.00740583	55	0.0716992	0.270081	0.0613594	0.0793877	0.0183436	Mmp7(1.09), Defb19(1.06), Pglyrp1(0.68), Fgr(0.54), Fgr(0.54), Ncf1(0.48), Epha2(0.43), Tirap(0.3), Card9(0.24), Hist1h2bc(0.19), Myd88(0.18), Rpl39(0.17), Hck(0.16), P2rx7(0.16), Lyz2(0.15), Ripk2(0.14), Adm(0.13), H2-T23(0.12), C5ar1(0.11), Hmgb2(0.09), Tbk1(0.07), Havcr2(0.06), B2m(0.04), Seh1l(0.03), Tlr2(-0.01), Tlr2(-0.01), Nod1(-0.01), Nod1(-0.01), Cd36(-0.02), Drosha(-0.06), Acp5(-0.09), …
response to zinc ion	0.0324553	0.281504	0.000745368	0.00755619	21	0.00759082	0.0705725	0.0657572	0.0307241	0.569516	Slc30a4(0.29), P2rx7(0.16), Slc30a7(0.13), Ggh(0.09), Hvcn1(0.07), Hvcn1(0.07), Slc30a2(0.06), Slc30a5(0.05), Slc30a5(0.05), Ass1(-0.06), Haao(-0.13), D2hgdh(-0.17), D2hgdh(-0.17), Alad(-0.2), Slc30a6(-0.2), Slc30a1(-0.27), Khk(-0.32), Pln(-0.34), Aldob(-0.44), Crip1(-0.46), Crip1(-0.46),
integral component of peroxisomal membrane	0.0514748	0.3066	0.000751353	0.00759511	16	0.0463604	0.00493152	0.141137	0.0869525	0.344269	Pex13(0.08), Pex11g(0.02), Pex12(0.02), Pex12(0.02), Pex16(0.01), Fis1(0), Pex26(-0.06), Pex3(-0.07), Pex2(-0.09), Slc27a2(-0.1), Slc27a2(-0.1), Pex11b(-0.13), Pex10(-0.21), Pex11a(-0.25), Slc25a17(-0.32), Abcd1(-0.38),
fucosidase activity	0.054572	0.269969	0.000757853	0.00763898	19	0.0930257	0.00670339	0.164723	0.257487	0.0474028	Ace(0.14), Edem1(0.14), Man1b1(0.1), Man1a(0.01), Man1a2(0.01), Fuca1(-0.02), Man2a2(-0.04), Man2c1(-0.05), Man2b1(-0.06), Edem2(-0.07), Edem3(-0.1), Pgghg(-0.11), Man2b2(-0.15), Glb1l(-0.18), Ctbs(-0.22), Man1c1(-0.22), Ganc(-0.37), Glb1l2(-0.48), AI464131(-0.56),
beta-amyloid binding	0.0439245	0.223193	0.000764705	0.00768616	31	0.0396674	0.647806	0.00110061	0.0820203	0.104234	Apoa1(0.51), Gsap(0.34), Ldlrap1(0.24), Ldlrap1(0.24), Apba3(0.04), Fbxo2(0.04), Apbb1(0.03), Apbb1(0.03), Itm2c(0.03), Itm2c(0.03), Cst3(0.02), Tgfb2(0), Tm2d1(0), Apoe(-0.01), Apoe(-0.01), Apbb2(-0.03), Bace2(-0.03), Itm2b(-0.04), Itm2b(-0.04), Cd74(-0.05), Clstn1(-0.06), Bace1(-0.13), Bace1(-0.13), Hsd17b10(-0.15), Ldlrad3(-0.24), Sorl1(-0.27), Itm2a(-0.31), Apba1(-0.34), Olfm1(-0.35), Ide(-0.…
exocytic vesicle	0.0506107	0.300799	0.000775464	0.00777222	15	0.0374309	0.367402	0.0922835	0.0219289	0.0531782	Syt17(0.07), Aqp2(0.06), Sytl2(0.06), Sytl2(0.06), Sytl5(0.02), Pi4k2a(-0.03), Sytl4(-0.06), Syt9(-0.06), Dpysl3(-0.1), Sytl1(-0.16), Akap7(-0.25), Rab27a(-0.32), Unc13d(-0.4), Syt3(-0.57), Igf1(-0.87),
DNA duplex unwinding	0.0224791	0.322662	0.00078004	0.00779599	17	0.727801	0.0121748	0.00552376	0.100854	0.0536991	Anxa1(0.2), Mre11a(0), Pot1a(-0.02), Nbn(-0.03), Nbn(-0.03), Rad50(-0.05), Rad50(-0.05), Ddx1(-0.05), Rtel1(-0.06), Ascc3(-0.09), Recql4(-0.14), Recql4(-0.14), Supv3l1(-0.14), Recql(-0.16), Wrn(-0.19), Xrcc6(-0.21), Xrcc5(-0.21),
fibroblast growth factor receptor signaling pathway	0.0645607	0.18782	0.000799719	0.00797016	38	0.0115557	0.266079	0.0517796	0.0448785	0.201514	Ctgf(0.55), Fgf21(0.43), Grb2(0.19), Fgf7(0.11), Setx(0.1), Iqgap1(0.09), Fgfr2(0.08), Fgfr2(0.08), Fgfr2(0.08), Sos1(0.04), Cep57(0), Cep57(0), Frs2(-0.02), Frs2(-0.02), Frs2(-0.02), Fgf2(-0.03), Fgfr1(-0.03), Fgfr1(-0.03), Rab14(-0.05), Fgfr4(-0.06), Fgfr4(-0.06), Ndst1(-0.08), Frs3(-0.09), Flrt2(-0.1), Fgf18(-0.11), Flrt3(-0.13), Kif16b(-0.14), Fgf1(-0.22), Shcbp1(-0.24), Fgf9(-0.25), Fgf9(-0.…
NADPH binding	0.0605941	0.304061	0.000816523	0.00811477	14	0.124798	0.0228551	0.075383	0.0202866	0.341127	Hmgcr(0.11), Kcnab1(0.1), Cryz(0.04), Dhfr(-0.06), Cbr4(-0.06), Akr1b10(-0.09), Mtrr(-0.09), Srd5a1(-0.16), Grhpr(-0.17), Fdxr(-0.19), Qdpr(-0.21), Decr1(-0.28), Cbr3(-0.42), Fasn(-0.43),
lipid transport	0.0329529	0.13567	0.000822393	0.00815021	75	0.026939	0.0927061	0.236198	0.0106603	0.221878	Mfsd2a(1.19), Apoa1(0.51), Apobr(0.41), Star(0.28), Atp10a(0.22), Gpihbp1(0.21), Esyt2(0.19), Osbpl11(0.18), Abcg1(0.15), Col4a3bp(0.15), Slc27a4(0.12), Osbpl5(0.12), Apob(0.11), Sigmar1(0.06), Scarb1(0.06), Triap1(0.06), Ano6(0.06), Hdlbp(0.06), Lrp10(0.05), Pitpnc1(0.05), Tspo(0.04), Esyt1(0.04), Atp11a(0.04), Tmem30b(0.04), Stard10(0.03), Vps51(0.03), Osbpl2(0.03), Got2(0.02), Stard3(0.02), Pl…
tropomyosin binding	0.0316584	0.450779	0.000825622	0.00815936	10	0.228257	0.299436	0.00683533	0.0402178	0.0603736	Lmod1(0.19), Tmod3(0.16), S100a6(-0.05), Pycard(-0.08), Tmod1(-0.17), Tmod1(-0.17), Tmod2(-0.26), Tmod2(-0.26), Tnnt2(-0.51), Tnnt3(-2.18),
glial cell migration	0.031818	0.428475	0.000862536	0.00850042	10	0.0424596	0.859951	0.00114179	0.0788945	0.028607	P2ry12(0.2), Tspo(0.04), Tgfb2(0), Ccl2(-0.17), P2ry1(-0.18), Ndn(-0.23), Fn1(-0.27), Cspg4(-0.28), Epha4(-0.5), Matn2(-0.99),
cellular water homeostasis	0.0530144	0.387501	0.000866477	0.00851555	10	0.0359486	0.0789923	0.0593592	0.00717889	0.58528	Aqp9(1.02), Slc6a12(0.27), Anxa7(0.18), Aqp2(0.06), Aqp1(-0.21), Aqp3(-0.27), Aqp7(-0.63), Aqp4(-0.89), Aqp6(-0.96), Aqp8(-1.35),
sugar:proton symporter activity	0.0461346	0.377933	0.000869505	0.00852163	10	0.00721487	0.0686633	0.0177393	0.158028	0.5141	Slc2a6(0.27), Slc35a2(0.04), Slc35a5(-0.06), Slc35a1(-0.08), Slc35a4(-0.12), Slc2a13(-0.28), Slc2a8(-0.31), Slc35a3(-0.31), Slc2a12(-0.62), Slc2a10(-0.63),
aminopeptidase activity	0.0412643	0.245672	0.000878637	0.00854602	31	0.0130169	0.00118088	0.0775514	0.72406	0.183414	Ctsl(0.43), Tpp2(0.07), Npepps(0.06), 2010111I01Rik(0.06), 2010111I01Rik(0.06), Dpp3(0.05), Dpp9(0.04), Npepl1(0.03), Blmh(0.02), Blmh(0.02), Metap1(0), Dnpep(-0.01), Lnpep(-0.01), Lnpep(-0.01), Lta4h(-0.02), Dpp7(-0.02), Ctsh(-0.03), Ctsh(-0.03), Enpep(-0.03), Metap2(-0.04), Lap3(-0.04), Dpp8(-0.05), Metap1d(-0.06), Erap1(-0.07), Erap1(-0.07), Rnpep(-0.12), Xpnpep3(-0.12), Pepd(-0.18), Xpnpep1(-…
3,4-dihydrocoumarin hydrolase activity	0.0527695	0.259305	0.000880024	0.00854602	20	0.0515525	0.00450936	0.0627164	0.286537	0.255532	Liph(0.5), Ces1e(0.09), Ddhd2(0.06), Ces1f(0.02), Plbd2(0.01), Prdx6(0), Ces2b(-0.07), Plbd1(-0.11), Ldah(-0.11), Ddhd1(-0.11), Daglb(-0.19), Pon3(-0.19), Pla1a(-0.2), Dagla(-0.22), Pnpla7(-0.25), Ache(-0.29), Nceh1(-0.32), Ces2g(-0.35), Abhd15(-0.38), Ces1g(-1.26),
heme biosynthetic process	0.0278057	0.259743	0.000880024	0.00854602	26	0.0320856	0.000940743	0.0504931	0.673392	0.199253	Alas2(1.21), Alas1(0.25), Iba57(0.15), Fech(0.04), Fech(0.04), Fech(0.04), Fech(0.04), Fxn(0.03), Tmem14c(0.03), Hmbs(0.02), Atpif1(0.01), Atpif1(0.01), Snx3(-0.01), Ppox(-0.02), Ppox(-0.02), Slc25a39(-0.11), Cox10(-0.16), Hnf1a(-0.18), Urod(-0.18), Alad(-0.2), Alad(-0.2), Uros(-0.23), Uros(-0.23), Slc11a2(-0.24), Cpox(-0.34), Cpox(-0.34),
glycogen metabolic process	0.0636792	0.195444	0.000881656	0.00854602	34	0.0487903	0.145245	0.0597933	0.0557498	0.128934	Ppp1r3b(0.18), Stbd1(0.17), Ppp1r2(0.17), Akt1(0.11), Gsk3a(0.1), Gsk3b(0.08), Stk40(0.06), Ppp1r3e(0.06), Ppp1ca(0.04), Akt2(0.03), Ppp1cb(0.03), Il6st(0.01), Phkg2(0.01), Gaa(-0.05), Pygl(-0.06), Pygl(-0.06), Pygb(-0.09), Prkag2(-0.11), Tcf7l2(-0.13), Phka2(-0.15), Gnmt(-0.17), Agl(-0.17), Phkb(-0.22), Gys1(-0.23), Phka1(-0.23), Epm2a(-0.24), Gys2(-0.3), Pcdh12(-0.43), Ppp1r1a(-0.54), Slc37a4(-…
neuronal cell body membrane	0.0683528	0.267619	0.000888059	0.00858457	18	0.364595	0.0911979	0.06304	0.024494	0.0351194	Adrb2(0.54), Il6ra(0.28), Kcnc2(0.16), Kcnc2(0.16), Atp2b1(0.11), Slc4a8(0.08), Il6st(0.01), Dab2ip(-0.01), Amigo1(-0.07), Kcnc3(-0.11), Unc5a(-0.15), Aqp1(-0.21), Kcnb1(-0.58), Kcnb1(-0.58), Atp2b2(-0.62), Ngfr(-0.83), Flrt1(-0.9), Cx3cr1(-1.37),
cell fate commitment	0.0701835	0.188324	0.000912976	0.00880139	43	0.00975993	0.0891284	0.188126	0.0714222	0.173991	Wnt11(0.8), Prdm1(0.43), Sox9(0.41), Tead4(0.36), Spry2(0.3), Spry2(0.3), Casp3(0.28), Tgfb1i1(0.28), Wnt7a(0.22), Kdm6b(0.17), Pml(0.13), Bmp2(0.11), Wnt9a(0.1), Tal1(0.09), Fgfr2(0.08), Smad2(0.07), Kdr(0.04), Rbpj(0.04), Wnt7b(0.04), Notch1(0.03), Hes1(0.01), Hey2(0), Wnt10a(-0.08), Bmp4(-0.15), Ror2(-0.19), Sox12(-0.22), Sox5(-0.22), Gas1(-0.24), Gas1(-0.24), Wnt2b(-0.24), Hoxa2(-0.25), Sox6(…
carboxypeptidase activity	0.0391814	0.254122	0.000943235	0.00906838	23	0.314644	0.000528588	0.0293106	0.418964	0.136641	Cpe(0.18), Cpe(0.18), Cndp2(0.16), Ace(0.14), Aebp1(0.13), Agbl5(0.08), Cpq(0), Agtpbp1(-0.05), Cpd(-0.06), Ctsa(-0.1), Scpep1(-0.12), Ace2(-0.13), Ace2(-0.13), Prcp(-0.16), Cpn1(-0.2), Cpn1(-0.2), Cndp1(-0.2), Agbl3(-0.22), Naalad2(-0.25), Cpm(-0.26), Folh1(-0.42), Cpb2(-0.52), Cpb2(-0.52),
nuclear chromosome, telomeric region	0.048295	0.140509	0.000951786	0.00912022	113	0.161992	0.024321	0.0595215	0.177241	0.0668114	Ercc1(0.62), Pot1b(0.27), Kdm1a(0.27), Sun2(0.22), Sun2(0.22), H3f3b(0.21), Tfip11(0.17), Terf1(0.16), Terf1(0.16), Orc2(0.13), Pml(0.13), Pinx1(0.13), Pinx1(0.13), Wrnip1(0.13), Tinf2(0.12), Tinf2(0.12), Nhp2(0.12), Rpa2(0.11), Tert(0.1), Thoc7(0.1), Thoc1(0.09), Ppp1r10(0.08), Tox4(0.08), Lrif1(0.08), H3f3a(0.07), Pcna(0.07), Ctc1(0.07), Ctc1(0.07), Obfc1(0.07), Obfc1(0.07), Upf1(0.06), Ten1(0.…
neuromuscular junction	0.0621509	0.152581	0.000953782	0.00912022	56	0.0287627	0.230054	0.0141565	0.225747	0.0873084	Cdk5r1(1.12), Thbs4(0.74), Nefm(0.5), Camk2d(0.42), Unc13a(0.41), Dok7(0.39), Musk(0.36), Musk(0.36), Fchsd1(0.32), Unc13b(0.23), Itgb1(0.22), Itgb1(0.22), Psen1(0.18), Prkar1a(0.17), Serpine2(0.17), P2rx7(0.16), Myh9(0.1), Trip4(0.07), Hdac4(0.06), Fchsd2(0.05), Sync(0.04), Ascc1(0.02), App(0), Syngr2(0), Dlg1(-0.01), Itga7(-0.03), Nrg1(-0.05), Prkaca(-0.07), Des(-0.11), Kcnc3(-0.11), Syngr1(-0.…
activation of protein kinase B activity	0.07089	0.272617	0.000956541	0.00912195	17	0.0872789	0.0549626	0.118778	0.0980658	0.0655959	Pdgfb(0.25), Src(0.22), Ccdc88a(0.03), Ntrk3(0.01), Itgb1bp1(-0.02), Pdpk1(-0.02), Adra2a(-0.05), Ntf3(-0.07), Insr(-0.11), Prkcz(-0.18), Osbpl8(-0.19), Fgf1(-0.22), Wnt5a(-0.27), Adra2b(-0.45), Gas6(-0.53), Ang(-0.56), Igf1(-0.87),
nucleoside diphosphate phosphorylation	0.0590639	0.326952	0.000962867	0.00915759	12	0.319389	0.395027	0.0236952	0.00747548	0.0372888	Nme2(0.13), Cmpk1(0.09), Nme1(0), Ak7(0), Nme7(-0.1), Nme6(-0.14), Ak5(-0.24), Nme4(-0.4), Nme5(-0.54), Ak1(-0.57), Ak4(-0.57), Cmpk2(-0.81),
protein O-linked glycosylation	0.0390258	0.226922	0.000972833	0.00922145	34	0.281036	0.00751818	0.00706722	0.400816	0.112774	B3galnt2(0.62), Tet3(0.11), Pomk(0.09), Pomk(0.09), C1galt1(0.08), Pgm3(0.07), Galnt2(0.04), Galnt2(0.04), Pomgnt1(-0.02), Pomgnt1(-0.02), C1galt1c1(-0.03), C1galt1c1(-0.03), Pomgnt2(-0.03), Eogt(-0.06), Ogt(-0.07), Ogt(-0.07), Ogt(-0.07), Ogt(-0.07), Pomt2(-0.08), Galnt10(-0.09), Galnt10(-0.09), Poglut1(-0.09), Poglut1(-0.09), Trak2(-0.1), Galnt1(-0.11), Galnt7(-0.12), Vegfb(-0.15), Pofut1(-0.15…
positive regulation of calcium ion-dependent exocytosis	0.0727827	0.338194	0.000974795	0.00922145	11	0.0962489	0.139419	0.0399307	0.0590682	0.109984	Stx1a(0.42), Arf1(0.08), Stxbp1(0.05), Syt9(-0.06), Tmem27(-0.08), Cdk5(-0.17), Scamp5(-0.26), Cacna1h(-0.45), Kcnb1(-0.58), Cacna1g(-0.78), Cacna1g(-0.78),
sperm capacitation	0.0490034	0.306378	0.000986983	0.00931185	15	0.160702	0.00365676	0.057858	0.103022	0.34188	Calca(0.84), Acrbp(0.3), Cabyr(0.09), Pcsk4(0.07), Pcsk4(0.07), Pebp1(-0.04), Prkaca(-0.07), Dld(-0.11), Abhd2(-0.13), Slc26a6(-0.31), Cftr(-0.35), Catsper2(-0.35), Ropn1l(-0.38), Catsper4(-0.68), Sept4(-0.75),
collagen fibril organization	0.023193	0.238685	0.00100062	0.00941545	39	0.194427	0.319432	0.00357719	0.344061	0.00643052	Col11a2(0.45), Col11a2(0.45), Sfrp2(0.38), Lox(0.32), Lox(0.32), Tgfbr1(0.27), Mmp11(0.23), Foxc1(0.19), Col5a2(0.17), Col5a2(0.17), Plod3(0.16), Anxa2(0.08), Serpinh1(0.07), Dpt(0.07), Foxc2(0.06), P3h1(0.06), Lum(0.02), Tgfb2(0), Adamts2(-0.01), Lmx1b(-0.07), Nf1(-0.09), Serpinf2(-0.09), Cyp1b1(-0.11), P4ha1(-0.14), Col3a1(-0.18), Col3a1(-0.18), Grem1(-0.18), Loxl2(-0.23), Ddr2(-0.28), Atp7a(-0…
juxtaparanode region of axon	0.0358172	0.404147	0.00101813	0.00955477	11	0.0167543	0.59416	0.00828549	0.431963	0.00728527	Kcna1(0.11), Kcna1(0.11), Kcnab1(0.1), Sirt2(0.03), Kcnab2(-0.24), Kcnab2(-0.24), Dlg4(-0.29), Dlg4(-0.29), Dlg2(-0.5), Dlg2(-0.5), Epb41l3(-0.58),
respiratory electron transport chain	0.0444751	0.32571	0.00102302	0.00957525	15	0.0235206	0.118234	0.170825	0.00903607	0.340902	CYTB(0.13), Mybbp1a(0.04), Pink1(0.02), Ndufaf2(0.02), Ndufs6(0), Coq7(-0.03), Polg2(-0.05), Ndufa5(-0.09), Sdhb(-0.1), Sdhb(-0.1), Immp2l(-0.15), Sdha(-0.17), Sod2(-0.18), Aldh5a1(-0.34), Ppargc1a(-0.44),
iron ion binding	0.0434749	0.131037	0.00103342	0.00964711	99	0.33114	0.0560066	0.0833814	0.000565332	0.411522	Hbb-b2(1.87), Aloxe3(1.37), Cyp2b10(1.19), Lcn2(0.84), Alox5(0.77), Cyp27b1(0.73), Nos3(0.53), Cyp3a13(0.49), Cyp4a12a(0.38), Ch25h(0.35), Plod2(0.35), Fth1(0.3), Xdh(0.27), Cyp2e1(0.23), Msmo1(0.21), Cyp4f18(0.17), Jmjd6(0.17), Cyp4b1(0.16), Plod3(0.16), Phf8(0.15), Kdm3a(0.14), Fa2h(0.13), Phf2(0.12), Calr(0.11), Egln2(0.11), Tet3(0.11), Hif1an(0.11), Cdo1(0.1), P4ha2(0.1), Kdm7a(0.1), 2410016O…
adenylate cyclase-activating adrenergic receptor signaling pathway	0.0655041	0.36625	0.00111872	0.0103885	10	0.0984703	0.361795	0.061357	0.0409203	0.0282243	Adrb2(0.54), Rapgef2(-0.02), Adra2a(-0.05), Adcy9(-0.25), Adra1b(-0.31), Adra1a(-0.33), Adra1d(-0.36), Adra2b(-0.45), Adrb1(-0.57), Adrb1(-0.57),
hormone binding	0.0758507	0.270279	0.00112233	0.0103948	17	0.199265	0.0633863	0.0693372	0.0533557	0.0856777	Ucn2(0.64), Ttr(0.46), Hk3(0.33), Calr(0.11), Npr2(-0.02), Nr3c1(-0.13), Abhd2(-0.13), Crym(-0.15), Serpina7(-0.2), Npr1(-0.24), Npr3(-0.33), Lrp2(-0.34), Nr3c2(-0.42), Esr1(-0.45), Pgr(-0.54), Gper1(-0.56), Mchr1(-0.66),
positive regulation of synapse assembly	0.0474727	0.209695	0.00114456	0.010573	44	0.0826787	0.607573	0.00136905	0.0987312	0.0776589	Tpbg(0.67), Clstn3(0.38), Clstn3(0.38), Lrrn3(0.31), Amigo3(0.27), Efna5(0.26), Il1rap(0.26), Wnt7a(0.22), Wnt7a(0.22), Nlgn2(0.17), Adgrl2(0.15), Actr3(0.14), Oxtr(0.04), Stau2(0.03), Ephb3(0.01), Ntrk3(0.01), Mecp2(0), Ube2v2(0), Eef2k(-0.02), Thbs2(-0.02), Adnp(-0.06), Clstn1(-0.06), Ephb2(-0.07), Ephb2(-0.07), Amigo1(-0.07), Bdnf(-0.09), Flrt2(-0.1), Bhlhb9(-0.12), Flrt3(-0.13), Prkca(-0.14),…
protein complex scaffold	0.0668757	0.170236	0.00117089	0.010788	45	0.0258961	0.0108086	0.165946	0.265473	0.167083	Arrb2(0.21), Magi3(0.19), Akap13(0.17), Pkp2(0.14), Axin1(0.13), Axin1(0.13), Sept2(0.13), Homer1(0.12), Lamtor1(0.08), AI314180(0.07), Lamtor4(0.05), Smarcd1(0.05), Rb1cc1(0.04), Itsn1(0.04), Map2k2(0.04), Lamtor3(0.03), Tnrc6a(0.03), Cav2(0), Iscu(0), Dlg1(-0.01), Lamtor2(-0.04), Akap11(-0.05), BC029214(-0.05), Magi1(-0.06), Mpp7(-0.1), Hcn2(-0.11), Cnot1(-0.11), Cnot1(-0.11), Cav1(-0.12), Akap…
AMP binding	0.0683351	0.309609	0.00117419	0.0107903	13	0.0464351	0.190588	0.103354	0.0579803	0.079003	Prps1(0.21), Prkag1(0.11), Cyb5r3(0.11), Aprt(0.05), Fbp1(-0.05), Pygl(-0.06), Prkag2(-0.11), Akap7(-0.25), Acss1(-0.34), Prps2(-0.41), Pfkm(-0.58), Oxgr1(-0.68), Pygm(-0.8),
plasma membrane organization	0.0810498	0.296163	0.00119292	0.0109341	14	0.0328991	0.118386	0.0773814	0.149385	0.0955919	Baiap2l1(0.22), Sptb(0.21), P2rx7(0.16), Mtss1l(0.07), Mpp5(0.04), Sptbn1(-0.12), A4galt(-0.13), Baiap2l2(-0.14), Cav3(-0.32), Baiap2(-0.33), Mtss1(-0.39), Agrn(-0.4), Ank3(-0.41), Fat4(-0.52),
centriolar satellite	0.0438874	0.227388	0.00120802	0.0110288	29	0.208242	0.00614933	0.00411818	0.488393	0.212968	Krt18(0.21), Ssx2ip(0.17), Ssx2ip(0.17), Flot1(0.15), Ofd1(0.08), Pibf1(0.07), 4933427D14Rik(0.05), Cep72(0.01), Bbs4(0.01), Bbs4(0.01), Sdccag8(-0.01), Cep131(-0.07), Cep131(-0.07), Cep131(-0.07), Pax2(-0.1), C2cd3(-0.12), C2cd3(-0.12), Exoc7(-0.16), Fopnl(-0.16), Cep290(-0.16), Cep290(-0.16), Hook3(-0.17), Ccdc14(-0.18), Bbs9(-0.25), Pcm1(-0.3), Pcm1(-0.3), Zmynd10(-0.3), Aldob(-0.44), Spag5(-0…
drug transmembrane transport	0.0534536	0.324355	0.00121133	0.0110288	12	0.283679	0.0382113	0.240611	0.00129815	0.235262	Abcc1(0.03), Tmem30a(-0.05), Atp8b1(-0.06), Slc22a1(-0.1), Abcg2(-0.11), Slc31a1(-0.13), Abcb1a(-0.14), Abcc2(-0.19), Abcc3(-0.29), Slc47a1(-0.35), Slc47a1(-0.35), Abcc4(-0.37),
calcium ion homeostasis	0.0465231	0.265564	0.00121261	0.0110288	22	0.0630217	0.540034	0.16071	0.00147109	0.0828297	Cyp27b1(0.73), Ager(0.28), Adm(0.13), Sepn1(0.12), Trpv6(0.11), Tmtc2(0.09), Wfs1(0.05), Fam20a(0.05), Kdr(0.04), Trim24(0.04), Gnas(0.03), Ccdc47(-0.02), Cav1(-0.12), Jph2(-0.2), Cib2(-0.23), Stc2(-0.26), Tfap2b(-0.27), Kl(-0.42), Calb1(-0.56), Slc8a1(-0.84), Atp6v1b1(-0.85), Atp6v1b1(-0.85),
acyl-CoA hydrolase activity	0.0321248	0.265322	0.00122373	0.0110309	28	0.0325409	0.0055007	0.65367	0.0552283	0.117711	Acot10(0.32), Acot9(0.31), Acot2(0.31), Acot2(0.31), Acot5(0.26), Acot7(0.13), Lypla2(0.09), Ppt2(0.08), Acot8(0.07), Acot8(0.07), Ovca2(0.02), Park7(0.01), Lypla1(-0.02), Acot12(-0.13), Lyplal1(-0.15), Acot1(-0.17), Acot1(-0.17), Acot1(-0.17), Acot6(-0.18), Haghl(-0.23), Acot13(-0.25), Acot4(-0.57), Acot4(-0.57), Acot4(-0.57), Acot11(-0.83), Acot3(-0.92), Acot3(-0.92), Acot3(-0.92),
oxidoreductase activity, acting on the CH-OH group of donors, NAD or NADP as acceptor	0.0501361	0.24825	0.00122629	0.0110309	24	0.00909311	0.166398	0.173045	0.0143303	0.377248	Uevld(0.25), Hsd3b7(0.24), Sdr42e1(0.13), Hmgcr(0.11), Ctbp1(0.07), Ctbp2(0.07), Ugdh(0.04), Mdh2(0.01), Ldha(0), Idh3g(-0.07), Ldhb(-0.08), Phgdh(-0.1), Hsd3b3(-0.13), Mdh1(-0.16), Grhpr(-0.17), Fam213b(-0.2), Idh2(-0.23), Idh1(-0.24), Adhfe1(-0.25), Nsdhl(-0.3), Idh3a(-0.3), Gpd1l(-0.32), Gpd1(-0.61), Hsd3b2(-0.67),
arachidonic acid epoxygenase activity	0.0302143	0.313275	0.00123445	0.0110309	21	0.306116	0.00205967	0.20233	0.00405507	0.534935	Cyp2b10(1.19), Cyp2j13(0.31), Cyp2a4(0.26), Cyp2e1(0.23), Cyp4f18(0.17), Cyp2d9(0.08), Cyp2d12(0.01), Cyp2j6(-0.04), Cyp2j6(-0.04), Cyp2j9(-0.06), Cyp2c44(-0.06), Cyp2c44(-0.06), Cyp2d22(-0.11), Cyp2j11(-0.16), Cyp2j5(-0.21), Cyp2a5(-0.24), Cyp2d26(-0.26), Cyp4a31(-0.34), Cyp4a32(-0.35), Cyp2f2(-0.38), Cyp4a10(-0.59),
lytic transglycosylase activity	0.0622586	0.272041	0.00125026	0.0110309	18	0.119631	0.00741611	0.139649	0.326738	0.0530322	Ace(0.14), Edem1(0.14), Man1b1(0.1), Man1a(0.01), Man1a2(0.01), Man2a2(-0.04), Man2c1(-0.05), Man2b1(-0.06), Edem2(-0.07), Edem3(-0.1), Pgghg(-0.11), Man2b2(-0.15), Glb1l(-0.18), Ctbs(-0.22), Man1c1(-0.22), Ganc(-0.37), Glb1l2(-0.48), AI464131(-0.56),
mannosyl-oligosaccharide mannosidase activity	0.0622586	0.272041	0.00125026	0.0110309	18	0.119631	0.00741611	0.139649	0.326738	0.0530322	Ace(0.14), Edem1(0.14), Man1b1(0.1), Man1a(0.01), Man1a2(0.01), Man2a2(-0.04), Man2c1(-0.05), Man2b1(-0.06), Edem2(-0.07), Edem3(-0.1), Pgghg(-0.11), Man2b2(-0.15), Glb1l(-0.18), Ctbs(-0.22), Man1c1(-0.22), Ganc(-0.37), Glb1l2(-0.48), AI464131(-0.56),
galactosidase activity	0.0622586	0.272041	0.00125026	0.0110309	18	0.119631	0.00741611	0.139649	0.326738	0.0530322	Ace(0.14), Edem1(0.14), Man1b1(0.1), Man1a(0.01), Man1a2(0.01), Man2a2(-0.04), Man2c1(-0.05), Man2b1(-0.06), Edem2(-0.07), Edem3(-0.1), Pgghg(-0.11), Man2b2(-0.15), Glb1l(-0.18), Ctbs(-0.22), Man1c1(-0.22), Ganc(-0.37), Glb1l2(-0.48), AI464131(-0.56),
trehalase activity	0.0622586	0.272041	0.00125026	0.0110309	18	0.119631	0.00741611	0.139649	0.326738	0.0530322	Ace(0.14), Edem1(0.14), Man1b1(0.1), Man1a(0.01), Man1a2(0.01), Man2a2(-0.04), Man2c1(-0.05), Man2b1(-0.06), Edem2(-0.07), Edem3(-0.1), Pgghg(-0.11), Man2b2(-0.15), Glb1l(-0.18), Ctbs(-0.22), Man1c1(-0.22), Ganc(-0.37), Glb1l2(-0.48), AI464131(-0.56),
dextrin alpha-glucosidase activity	0.0622586	0.272041	0.00125026	0.0110309	18	0.119631	0.00741611	0.139649	0.326738	0.0530322	Ace(0.14), Edem1(0.14), Man1b1(0.1), Man1a(0.01), Man1a2(0.01), Man2a2(-0.04), Man2c1(-0.05), Man2b1(-0.06), Edem2(-0.07), Edem3(-0.1), Pgghg(-0.11), Man2b2(-0.15), Glb1l(-0.18), Ctbs(-0.22), Man1c1(-0.22), Ganc(-0.37), Glb1l2(-0.48), AI464131(-0.56),
starch alpha-glucosidase activity	0.0622586	0.272041	0.00125026	0.0110309	18	0.119631	0.00741611	0.139649	0.326738	0.0530322	Ace(0.14), Edem1(0.14), Man1b1(0.1), Man1a(0.01), Man1a2(0.01), Man2a2(-0.04), Man2c1(-0.05), Man2b1(-0.06), Edem2(-0.07), Edem3(-0.1), Pgghg(-0.11), Man2b2(-0.15), Glb1l(-0.18), Ctbs(-0.22), Man1c1(-0.22), Ganc(-0.37), Glb1l2(-0.48), AI464131(-0.56),
beta-glucanase activity	0.0622586	0.272041	0.00125026	0.0110309	18	0.119631	0.00741611	0.139649	0.326738	0.0530322	Ace(0.14), Edem1(0.14), Man1b1(0.1), Man1a(0.01), Man1a2(0.01), Man2a2(-0.04), Man2c1(-0.05), Man2b1(-0.06), Edem2(-0.07), Edem3(-0.1), Pgghg(-0.11), Man2b2(-0.15), Glb1l(-0.18), Ctbs(-0.22), Man1c1(-0.22), Ganc(-0.37), Glb1l2(-0.48), AI464131(-0.56),
beta-6-sulfate-N-acetylglucosaminidase activity	0.0622586	0.272041	0.00125026	0.0110309	18	0.119631	0.00741611	0.139649	0.326738	0.0530322	Ace(0.14), Edem1(0.14), Man1b1(0.1), Man1a(0.01), Man1a2(0.01), Man2a2(-0.04), Man2c1(-0.05), Man2b1(-0.06), Edem2(-0.07), Edem3(-0.1), Pgghg(-0.11), Man2b2(-0.15), Glb1l(-0.18), Ctbs(-0.22), Man1c1(-0.22), Ganc(-0.37), Glb1l2(-0.48), AI464131(-0.56),
glucan endo-1,4-beta-glucosidase activity	0.0622586	0.272041	0.00125026	0.0110309	18	0.119631	0.00741611	0.139649	0.326738	0.0530322	Ace(0.14), Edem1(0.14), Man1b1(0.1), Man1a(0.01), Man1a2(0.01), Man2a2(-0.04), Man2c1(-0.05), Man2b1(-0.06), Edem2(-0.07), Edem3(-0.1), Pgghg(-0.11), Man2b2(-0.15), Glb1l(-0.18), Ctbs(-0.22), Man1c1(-0.22), Ganc(-0.37), Glb1l2(-0.48), AI464131(-0.56),
DNA demethylation	0.0707684	0.285675	0.0012926	0.0112937	16	0.129854	0.0535776	0.174196	0.156387	0.0200671	Tet3(0.11), Tet3(0.11), Apobec2(0.1), Alkbh1(0.1), Apex1(0.05), Tdg(0.02), Tdg(0.02), Apobec1(-0.08), Fto(-0.11), Fto(-0.11), Tet2(-0.2), Tet2(-0.2), Tet2(-0.2), Tet1(-1.04), Tet1(-1.04), Tet1(-1.04),
prenylcysteine methylesterase activity	0.0521051	0.264719	0.0013375	0.0112937	19	0.0754097	0.00211253	0.0979274	0.348223	0.231651	Liph(0.5), Ces1e(0.09), Ddhd2(0.06), Ces1f(0.02), Plbd2(0.01), Prdx6(0), Ces2b(-0.07), Plbd1(-0.11), Ldah(-0.11), Ddhd1(-0.11), Daglb(-0.19), Pla1a(-0.2), Dagla(-0.22), Pnpla7(-0.25), Ache(-0.29), Nceh1(-0.32), Ces2g(-0.35), Abhd15(-0.38), Ces1g(-1.26),
1-oxa-2-oxocycloheptane lactonase activity	0.0521051	0.264719	0.0013375	0.0112937	19	0.0754097	0.00211253	0.0979274	0.348223	0.231651	Liph(0.5), Ces1e(0.09), Ddhd2(0.06), Ces1f(0.02), Plbd2(0.01), Prdx6(0), Ces2b(-0.07), Plbd1(-0.11), Ldah(-0.11), Ddhd1(-0.11), Daglb(-0.19), Pla1a(-0.2), Dagla(-0.22), Pnpla7(-0.25), Ache(-0.29), Nceh1(-0.32), Ces2g(-0.35), Abhd15(-0.38), Ces1g(-1.26),
sulfolactone hydrolase activity	0.0521051	0.264719	0.0013375	0.0112937	19	0.0754097	0.00211253	0.0979274	0.348223	0.231651	Liph(0.5), Ces1e(0.09), Ddhd2(0.06), Ces1f(0.02), Plbd2(0.01), Prdx6(0), Ces2b(-0.07), Plbd1(-0.11), Ldah(-0.11), Ddhd1(-0.11), Daglb(-0.19), Pla1a(-0.2), Dagla(-0.22), Pnpla7(-0.25), Ache(-0.29), Nceh1(-0.32), Ces2g(-0.35), Abhd15(-0.38), Ces1g(-1.26),
butyrolactone hydrolase activity	0.0521051	0.264719	0.0013375	0.0112937	19	0.0754097	0.00211253	0.0979274	0.348223	0.231651	Liph(0.5), Ces1e(0.09), Ddhd2(0.06), Ces1f(0.02), Plbd2(0.01), Prdx6(0), Ces2b(-0.07), Plbd1(-0.11), Ldah(-0.11), Ddhd1(-0.11), Daglb(-0.19), Pla1a(-0.2), Dagla(-0.22), Pnpla7(-0.25), Ache(-0.29), Nceh1(-0.32), Ces2g(-0.35), Abhd15(-0.38), Ces1g(-1.26),
endosulfan lactone lactonase activity	0.0521051	0.264719	0.0013375	0.0112937	19	0.0754097	0.00211253	0.0979274	0.348223	0.231651	Liph(0.5), Ces1e(0.09), Ddhd2(0.06), Ces1f(0.02), Plbd2(0.01), Prdx6(0), Ces2b(-0.07), Plbd1(-0.11), Ldah(-0.11), Ddhd1(-0.11), Daglb(-0.19), Pla1a(-0.2), Dagla(-0.22), Pnpla7(-0.25), Ache(-0.29), Nceh1(-0.32), Ces2g(-0.35), Abhd15(-0.38), Ces1g(-1.26),
L-ascorbate 6-phosphate lactonase activity	0.0521051	0.264719	0.0013375	0.0112937	19	0.0754097	0.00211253	0.0979274	0.348223	0.231651	Liph(0.5), Ces1e(0.09), Ddhd2(0.06), Ces1f(0.02), Plbd2(0.01), Prdx6(0), Ces2b(-0.07), Plbd1(-0.11), Ldah(-0.11), Ddhd1(-0.11), Daglb(-0.19), Pla1a(-0.2), Dagla(-0.22), Pnpla7(-0.25), Ache(-0.29), Nceh1(-0.32), Ces2g(-0.35), Abhd15(-0.38), Ces1g(-1.26),
Ser-tRNA(Thr) hydrolase activity	0.0521051	0.264719	0.0013375	0.0112937	19	0.0754097	0.00211253	0.0979274	0.348223	0.231651	Liph(0.5), Ces1e(0.09), Ddhd2(0.06), Ces1f(0.02), Plbd2(0.01), Prdx6(0), Ces2b(-0.07), Plbd1(-0.11), Ldah(-0.11), Ddhd1(-0.11), Daglb(-0.19), Pla1a(-0.2), Dagla(-0.22), Pnpla7(-0.25), Ache(-0.29), Nceh1(-0.32), Ces2g(-0.35), Abhd15(-0.38), Ces1g(-1.26),
Ala-tRNA(Pro) hydrolase activity	0.0521051	0.264719	0.0013375	0.0112937	19	0.0754097	0.00211253	0.0979274	0.348223	0.231651	Liph(0.5), Ces1e(0.09), Ddhd2(0.06), Ces1f(0.02), Plbd2(0.01), Prdx6(0), Ces2b(-0.07), Plbd1(-0.11), Ldah(-0.11), Ddhd1(-0.11), Daglb(-0.19), Pla1a(-0.2), Dagla(-0.22), Pnpla7(-0.25), Ache(-0.29), Nceh1(-0.32), Ces2g(-0.35), Abhd15(-0.38), Ces1g(-1.26),
Cys-tRNA(Pro) hydrolase activity	0.0521051	0.264719	0.0013375	0.0112937	19	0.0754097	0.00211253	0.0979274	0.348223	0.231651	Liph(0.5), Ces1e(0.09), Ddhd2(0.06), Ces1f(0.02), Plbd2(0.01), Prdx6(0), Ces2b(-0.07), Plbd1(-0.11), Ldah(-0.11), Ddhd1(-0.11), Daglb(-0.19), Pla1a(-0.2), Dagla(-0.22), Pnpla7(-0.25), Ache(-0.29), Nceh1(-0.32), Ces2g(-0.35), Abhd15(-0.38), Ces1g(-1.26),
Ser(Gly)-tRNA(Ala) hydrolase activity	0.0521051	0.264719	0.0013375	0.0112937	19	0.0754097	0.00211253	0.0979274	0.348223	0.231651	Liph(0.5), Ces1e(0.09), Ddhd2(0.06), Ces1f(0.02), Plbd2(0.01), Prdx6(0), Ces2b(-0.07), Plbd1(-0.11), Ldah(-0.11), Ddhd1(-0.11), Daglb(-0.19), Pla1a(-0.2), Dagla(-0.22), Pnpla7(-0.25), Ache(-0.29), Nceh1(-0.32), Ces2g(-0.35), Abhd15(-0.38), Ces1g(-1.26),
all-trans-retinyl-palmitate hydrolase, all-trans-retinol forming activity	0.0521051	0.264719	0.0013375	0.0112937	19	0.0754097	0.00211253	0.0979274	0.348223	0.231651	Liph(0.5), Ces1e(0.09), Ddhd2(0.06), Ces1f(0.02), Plbd2(0.01), Prdx6(0), Ces2b(-0.07), Plbd1(-0.11), Ldah(-0.11), Ddhd1(-0.11), Daglb(-0.19), Pla1a(-0.2), Dagla(-0.22), Pnpla7(-0.25), Ache(-0.29), Nceh1(-0.32), Ces2g(-0.35), Abhd15(-0.38), Ces1g(-1.26),
retinyl-palmitate esterase activity	0.0521051	0.264719	0.0013375	0.0112937	19	0.0754097	0.00211253	0.0979274	0.348223	0.231651	Liph(0.5), Ces1e(0.09), Ddhd2(0.06), Ces1f(0.02), Plbd2(0.01), Prdx6(0), Ces2b(-0.07), Plbd1(-0.11), Ldah(-0.11), Ddhd1(-0.11), Daglb(-0.19), Pla1a(-0.2), Dagla(-0.22), Pnpla7(-0.25), Ache(-0.29), Nceh1(-0.32), Ces2g(-0.35), Abhd15(-0.38), Ces1g(-1.26),
mannosyl-oligosaccharide 1,6-alpha-mannosidase activity	0.0521051	0.264719	0.0013375	0.0112937	19	0.0754097	0.00211253	0.0979274	0.348223	0.231651	Liph(0.5), Ces1e(0.09), Ddhd2(0.06), Ces1f(0.02), Plbd2(0.01), Prdx6(0), Ces2b(-0.07), Plbd1(-0.11), Ldah(-0.11), Ddhd1(-0.11), Daglb(-0.19), Pla1a(-0.2), Dagla(-0.22), Pnpla7(-0.25), Ache(-0.29), Nceh1(-0.32), Ces2g(-0.35), Abhd15(-0.38), Ces1g(-1.26),
mannosyl-oligosaccharide 1,3-alpha-mannosidase activity	0.0521051	0.264719	0.0013375	0.0112937	19	0.0754097	0.00211253	0.0979274	0.348223	0.231651	Liph(0.5), Ces1e(0.09), Ddhd2(0.06), Ces1f(0.02), Plbd2(0.01), Prdx6(0), Ces2b(-0.07), Plbd1(-0.11), Ldah(-0.11), Ddhd1(-0.11), Daglb(-0.19), Pla1a(-0.2), Dagla(-0.22), Pnpla7(-0.25), Ache(-0.29), Nceh1(-0.32), Ces2g(-0.35), Abhd15(-0.38), Ces1g(-1.26),
methyl indole-3-acetate esterase activity	0.0521051	0.264719	0.0013375	0.0112937	19	0.0754097	0.00211253	0.0979274	0.348223	0.231651	Liph(0.5), Ces1e(0.09), Ddhd2(0.06), Ces1f(0.02), Plbd2(0.01), Prdx6(0), Ces2b(-0.07), Plbd1(-0.11), Ldah(-0.11), Ddhd1(-0.11), Daglb(-0.19), Pla1a(-0.2), Dagla(-0.22), Pnpla7(-0.25), Ache(-0.29), Nceh1(-0.32), Ces2g(-0.35), Abhd15(-0.38), Ces1g(-1.26),
methyl salicylate esterase activity	0.0521051	0.264719	0.0013375	0.0112937	19	0.0754097	0.00211253	0.0979274	0.348223	0.231651	Liph(0.5), Ces1e(0.09), Ddhd2(0.06), Ces1f(0.02), Plbd2(0.01), Prdx6(0), Ces2b(-0.07), Plbd1(-0.11), Ldah(-0.11), Ddhd1(-0.11), Daglb(-0.19), Pla1a(-0.2), Dagla(-0.22), Pnpla7(-0.25), Ache(-0.29), Nceh1(-0.32), Ces2g(-0.35), Abhd15(-0.38), Ces1g(-1.26),
methyl jasmonate esterase activity	0.0521051	0.264719	0.0013375	0.0112937	19	0.0754097	0.00211253	0.0979274	0.348223	0.231651	Liph(0.5), Ces1e(0.09), Ddhd2(0.06), Ces1f(0.02), Plbd2(0.01), Prdx6(0), Ces2b(-0.07), Plbd1(-0.11), Ldah(-0.11), Ddhd1(-0.11), Daglb(-0.19), Pla1a(-0.2), Dagla(-0.22), Pnpla7(-0.25), Ache(-0.29), Nceh1(-0.32), Ces2g(-0.35), Abhd15(-0.38), Ces1g(-1.26),
mannose metabolic process	0.0747223	0.357393	0.00135839	0.0114156	10	0.0360511	0.07053	0.383551	0.0513869	0.0660483	Pmm1(0.12), Man2a1(-0.01), Man2a2(-0.04), Man2c1(-0.05), Man2b1(-0.06), Man2b1(-0.06), Pmm2(-0.13), Man2b2(-0.15), Man2b2(-0.15), Man1c1(-0.22),
positive regulation of glucose import in response to insulin stimulus	0.0757357	0.332901	0.00138684	0.0116271	11	0.0384597	0.0490549	0.0376695	0.246105	0.211373	Rnasel(0.28), Ptpn11(0.09), Akt2(0.03), Nr1h4(-0.13), C2cd5(-0.18), C2cd5(-0.18), Osbpl8(-0.19), Irs1(-0.24), Agt(-0.42), Rarres2(-1.33), Rarres2(-1.33),
retinol metabolic process	0.0370442	0.281512	0.00140829	0.011779	21	0.0140592	0.0388572	0.186132	0.243749	0.128599	Rdh12(1.22), Ttr(0.46), Adh7(0.18), Adh7(0.18), Rdh10(0.11), Adh1(-0.05), Adh1(-0.05), Rdh14(-0.07), Cyp1b1(-0.11), Cyp1b1(-0.11), Rbp1(-0.14), Rbp1(-0.14), Rbp1(-0.14), Lrat(-0.25), Lrat(-0.25), Lrat(-0.25), Retsat(-0.29), Aldh1a1(-0.32), Dhrs3(-0.59), Rbp4(-0.8), Rbp4(-0.8),
sarcomere	0.0602151	0.251863	0.00141785	0.011831	20	0.0601689	0.17429	0.118119	0.0396019	0.106711	Ankrd2(1), Actn1(0.3), Lmod1(0.19), Trpc1(0.16), Psma6(0.12), Arf1(0.08), Hdac4(0.06), Lman1(-0.1), Tmod1(-0.17), Tmod1(-0.17), Habp4(-0.21), Abcc9(-0.23), Fhod3(-0.23), Myom1(-0.31), Syne1(-0.39), Mmp2(-0.48), Tnnt2(-0.51), Ak1(-0.57), Ttn(-0.73), Acta1(-1.59),
inositol 1,4,5 trisphosphate binding	0.0371745	0.413999	0.00142375	0.0118523	10	0.00882358	0.676784	0.0014207	0.605844	0.0205888	Cyth2(0.23), Trpc1(0.16), Itpr3(0.06), Itpr3(0.06), Trpc6(-0.04), Plcl1(-0.15), Itpr2(-0.32), Itpr2(-0.32), Itpr1(-0.44), Trpc3(-1.62),
photoreceptor inner segment	0.0464479	0.241538	0.00143578	0.0119244	27	0.0771265	0.654477	0.0235213	0.0243024	0.0463919	Rdh11(0.31), Myo3b(0.3), Gnb1(0.13), Eno2(0.04), Phlpp2(0.04), Rapgef4(0.03), Dynlt1b(0.02), Dnm2(0.01), Bbs4(0.01), Hspa8(0), Dram2(-0.01), Whrn(-0.03), Whrn(-0.03), Kifap3(-0.05), Guca1b(-0.08), Gnat1(-0.12), Rgs9(-0.12), Gnb5(-0.21), Cib2(-0.23), Dnm1(-0.33), Ush1c(-0.36), Sptbn2(-0.44), Kif17(-0.46), Nos1(-0.56), Dnm3(-0.59), Shank2(-0.87), Crocc(-1.07),
glutathione peroxidase activity	0.0412052	0.271381	0.00153538	0.012692	23	0.0758773	0.0100853	0.0968401	0.0845955	0.425075	Gpx6(2.94), Mgst1(0.2), Gstp2(0.12), Gstp1(0.06), Gpx3(0.04), Gpx3(0.04), Prdx6(0), Gpx8(-0.01), Ltc4s(-0.07), Gstk1(-0.08), Gstk1(-0.08), Gpx1(-0.11), Gpx1(-0.11), Gpx1(-0.11), Gpx7(-0.11), Gpx4(-0.11), Gpx4(-0.11), Gstt2(-0.15), Mgst3(-0.15), Mgst3(-0.15), Gstt1(-0.18), Gstz1(-0.22), Gstm7(-0.26),
prostate gland epithelium morphogenesis	0.0800658	0.332332	0.00154829	0.0127689	11	0.0622584	0.128247	0.179671	0.111515	0.0352787	Tnc(0.41), Id4(0.2), Rarg(0.04), Notch1(0.03), Igf1r(-0.05), Cyp7b1(-0.06), Stat5a(-0.23), Foxa1(-0.28), Mmp2(-0.48), Ar(-0.55), Igf1(-0.87),
glycerol-3-phosphate O-acyltransferase activity	0.0730128	0.363792	0.00161865	0.0133181	10	0.0650948	0.238186	0.266221	0.0930363	0.00794377	Gpat4(0.09), Gpat4(0.09), Gpat4(0.09), Agpat9(0.01), Agpat9(0.01), Gpam(-0.33), Gpam(-0.33), Gpam(-0.33), Gpat2(-0.54), Gpat2(-0.54),
brown fat cell differentiation	0.0357428	0.251105	0.00164357	0.0134606	31	0.00318939	0.00947047	0.066202	0.0431615	0.95739	Ptgs2(1.16), Adrb2(0.54), Cebpb(0.52), Rgs2(0.42), Sh2b2(0.28), Selenbp1(0.23), Zfp516(0.19), Metrnl(0.16), Arl4a(0.13), Lrg1(0.06), Plac8(0.06), Bnip3(0.04), Fabp4(0.03), Ero1l(-0.01), Itga6(-0.07), Lama4(-0.11), Nudt7(-0.14), Cebpa(-0.18), Aldh6a1(-0.18), Pex11a(-0.25), Prdm16(-0.26), Prdm16(-0.26), Pparg(-0.32), Mrap(-0.41), Lamb3(-0.54), Adrb1(-0.57), Slc2a4(-0.63), Scd1(-0.74), Ucp1(-1.27), …
DNA damage checkpoint	0.0578176	0.223216	0.00168424	0.0137618	31	0.636095	0.0357303	0.0271316	0.0809214	0.0377105	Pea15a(0.18), Tiprl(0.16), Usp28(0.15), Usp28(0.15), Dot1l(0.14), Rhno1(0.1), Ptpn11(0.09), Tipin(0.09), Rad17(0.07), Rad1(0.05), Rad1(0.05), Zak(0.04), Rad9a(0), Rad9a(0), Ints7(-0.02), Nbn(-0.03), Hinfp(-0.07), Clock(-0.09), Trp53bp1(-0.12), Mapk14(-0.17), Atr(-0.21), Atr(-0.21), Chek2(-0.24), Hus1(-0.25), Hus1(-0.25), Chek1(-0.47), Chek1(-0.47), Chek1(-0.47), Atm(-0.51), E2f1(-0.64), Rad9b(-0.…
long-chain fatty acid metabolic process	0.0591307	0.281391	0.00171684	0.0139958	22	0.0816304	0.0344681	0.294742	0.10333	0.0633444	Acsl6(0.41), Acot2(0.31), Acot5(0.26), Cyp4f18(0.17), Slc27a4(0.12), Slc27a4(0.12), Slc27a4(0.12), Acsbg1(0.09), Acsbg1(0.09), Pam(0.05), Cpt1a(0.03), Cd36(-0.02), Slc27a2(-0.1), Slc27a2(-0.1), Slc27a2(-0.1), Acot1(-0.17), Acsl1(-0.34), Slc27a3(-0.38), Slc27a1(-0.5), Acot4(-0.57), Acot3(-0.92), Acot3(-0.92),
cellular response to glucose stimulus	0.0605776	0.230752	0.00172869	0.01406	25	0.0207183	0.00998557	0.0678524	0.553696	0.207559	Sox4(0.67), Ppp3ca(0.14), Ppp2ca(0.12), Ern1(0.12), Rack1(0.08), Sin3a(0.05), Pik3ca(0.01), Pdk3(0), Igf1r(-0.05), Prkaca(-0.07), Ogt(-0.07), Icam1(-0.08), Pax2(-0.1), Pax2(-0.1), Gpx1(-0.11), Vcam1(-0.15), Nox4(-0.23), Aacs(-0.29), Apoc3(-0.39), Gas6(-0.53), Mlxipl(-0.55), Gper1(-0.56), Kcnb1(-0.58), Igf1(-0.87), Aqp4(-0.89),
polysaccharide binding	0.0545216	0.354476	0.00173635	0.0140899	11	0.0377318	0.0347253	0.338421	0.0182004	0.33268	Prg4(0.46), Tinagl1(0.2), Endou(0.08), Enpp2(-0.12), Susd2(-0.12), Agl(-0.17), Agl(-0.17), Enpp1(-0.32), Enpp3(-0.43), Sbspon(-0.51), Mbl1(-0.55),
homophilic cell adhesion via plasma membrane adhesion molecules	0.0386132	0.1733	0.00184918	0.0149712	62	0.136934	0.791265	0.0327164	0.0136518	0.015462	Celsr3(1.19), Pcdh8(0.77), Pvr(0.5), Cdh5(0.45), Dscaml1(0.39), Dscaml1(0.39), Clstn3(0.38), Nectin2(0.35), Nectin2(0.35), Esam(0.28), Cdh1(0.26), Nectin4(0.22), Cadm3(0.17), Cadm1(0.15), Pik3cb(0.13), Cd200(0.12), Cdh6(0.11), Igsf9b(0.1), Dsc2(0.08), Cdh4(0.07), Ptprm(0.03), Cdh24(0.01), Ret(0), Cdh16(-0.03), Pcdh18(-0.04), Clstn1(-0.06), Pcdh1(-0.06), Dsg2(-0.07), Cdhr5(-0.07), Pcdhgc3(-0.07), …
sodium-independent organic anion transport	0.00673973	0.376985	0.00187845	0.0151734	21	0.153668	0.000493972	0.737702	0.00492707	0.412753	Slco1a1(0.44), Slco4a1(0.2), Slc22a22(0.2), Mfsd10(0.19), Slc22a28(0.13), Slco2a1(0.06), Slc22a30(0.04), Slco1a4(0), Slco1a4(0), Slc22a29(-0.04), Slco3a1(-0.09), Slco1a6(-0.2), Slc22a6(-0.24), Slc22a6(-0.24), Slc22a8(-0.25), Slc22a12(-0.25), Slco4c1(-0.33), Slc22a19(-0.41), Slco2b1(-0.5), Slc22a26(-0.67), Gm6614(-1.22),
vacuolar proton-transporting V-type ATPase complex	0.0725844	0.264341	0.00195022	0.0157172	18	0.0242791	0.2541	0.0523859	0.0353216	0.348446	Atp6v0a1(0.17), Atp6v0c(0.09), Atp6v0b(0.05), Atp6v1g3(0.05), Atp6v0a2(0.04), Atp6v0d1(0.01), Atp6v0d1(0.01), Atp6v1f(0.01), Atp6v1g1(-0.05), Tcirg1(-0.09), Atp6v1g2(-0.28), Atp6v0d2(-0.28), Atp6v0d2(-0.28), Atp6v0a4(-0.32), Atp6v0a4(-0.32), Atp6v0a4(-0.32), Atp6v1b1(-0.85), Atp6v1b1(-0.85),
hydrolase activity, acting on ester bonds	0.0412168	0.231768	0.00196791	0.0158238	25	0.116789	0.00028523	0.277252	0.151058	0.425532	Nt5e(0.4), Esd(0.23), Esd(0.23), Endou(0.08), Dbr1(0.08), Tatdn1(0.06), Ercc5(0.05), Rexo2(0.01), Pgap3(-0.08), Aoah(-0.1), Fan1(-0.1), Pgap1(-0.13), 4931406C07Rik(-0.15), Lipa(-0.16), Dtd2(-0.17), Faah(-0.21), Acy3(-0.21), Dtd1(-0.23), Apmap(-0.24), Fen1(-0.25), Lipe(-0.26), Tatdn3(-0.3), Fasn(-0.43), Pter(-0.66), Aspa(-0.79),
acyl-CoA ligase activity	0.064021	0.340959	0.00197638	0.0158344	11	0.0318518	0.00890923	0.118586	0.258448	0.348156	Slc27a4(0.12), Acsm1(-0.03), Acsm1(-0.03), Acsf3(-0.07), Suclg2(-0.1), Slc27a2(-0.1), Sucla2(-0.11), Aasdh(-0.18), Slc27a3(-0.38), Acsf2(-0.46), Slc27a1(-0.5),
negative regulation of cell adhesion	0.0672016	0.185486	0.00197819	0.0158344	36	0.331844	0.354455	0.0777293	0.0385823	0.00719346	Cldn7(0.43), Tnc(0.41), Dscaml1(0.39), Rnd1(0.36), Jam2(0.33), Ager(0.28), Pde3b(0.28), Erbb3(0.22), Nat8f1(0.1), Adam10(0.05), Plxnb1(0.03), Plxnb1(0.03), Cbll1(0.02), Dab1(0.01), Podxl(0), Sema4d(-0.03), Lamb1(-0.04), Rasa1(-0.04), Lpxn(-0.09), Plxnb2(-0.11), Cdh13(-0.13), Dact2(-0.16), Nat8(-0.18), Acvrl1(-0.23), Pik3r1(-0.24), Nat8f5(-0.28), Srcin1(-0.32), Myo1f(-0.34), Spn(-0.34), Spn(-0.34)…
collagen binding	0.0306189	0.190016	0.00198898	0.0158849	56	0.413802	0.489196	0.0130327	0.0657464	0.00692123	Srgn(0.75), Thbs4(0.74), Smad3(0.35), Pdgfa(0.31), Ctss(0.27), Itga3(0.26), Pdgfb(0.25), Itgb1(0.22), Ctsb(0.14), Smad4(0.13), C1qtnf1(0.13), Pak1(0.1), Ccbe1(0.09), Adam9(0.08), Serpinh1(0.07), Dcn(0.07), Itga2(0.07), Sparc(0.03), Sparc(0.03), Lum(0.02), Lum(0.02), Smad7(0.02), Hsd17b12(-0.01), Tgfbi(-0.02), Nid1(-0.03), Nid1(-0.03), Itga9(-0.03), Ap1g1(-0.04), Coch(-0.08), Ddr1(-0.1), Ddr1(-0.1…
cell development	0.0825487	0.208308	0.00209734	0.0167126	27	0.148806	0.259186	0.0761143	0.159156	0.0111531	Ercc1(0.62), Inhba(0.54), Gdf15(0.26), Gata6(0.23), Lefty1(0.19), Arid5b(0.19), Irf6(0.13), Gjc1(0.06), Pex5(0.02), Tcf3(0.02), Gak(0.02), Traf6(-0.04), Cyb5r4(-0.05), Bmp7(-0.09), Irx5(-0.15), Smo(-0.18), Maf(-0.19), Bmp3(-0.25), Bmp1(-0.26), Prdm16(-0.26), Trps1(-0.34), Hsf4(-0.35), Id2(-0.4), Gdf10(-0.5), Igf1(-0.87), Pla2g3(-0.97), Gata5(-1.12),
negative regulation of smooth muscle cell proliferation	0.0769175	0.209522	0.00214948	0.0170512	32	0.0437219	0.423465	0.0758528	0.0306106	0.119548	Igfbp3(0.67), Hmox1(0.61), Trib1(0.55), Nos3(0.53), Nppb(0.26), Klf4(0.24), Tnfaip3(0.15), Sf1(0.15), Ralbp1(0.12), Ppard(0.11), Trp53(0.08), Ctnnbip1(-0.04), Apod(-0.1), Cav1(-0.12), Ace2(-0.13), Ptgir(-0.14), Ptgir(-0.14), Mfn2(-0.15), Ndrg2(-0.16), Comt(-0.23), Npr1(-0.24), Pik3r1(-0.24), Igfbp5(-0.31), Pparg(-0.32), Npr3(-0.33), Ndrg4(-0.33), Il15(-0.43), Ppargc1a(-0.44), Esr1(-0.45), Ang(-0.…
3-hydroxyacyl-CoA dehydrogenase activity	0.0180896	0.454161	0.00220666	0.0174657	10	0.061775	9.12674e-05	0.0745356	0.456995	0.679685	Ehhadh(0.02), Ehhadh(0.02), H2-Ke6(-0.08), Hsd17b4(-0.09), Hsd17b10(-0.15), Cryl1(-0.17), Hadhb(-0.17), Hadha(-0.19), Hadh(-0.28), Hadh(-0.28),
adenosine receptor signaling pathway	0.0393519	0.435526	0.00222176	0.017546	11	0.00180116	0.947058	0.0194049	0.0895014	0.0487455	Adora2b(0.67), P2ry12(0.2), Gnai2(0.04), Gnai2(0.04), Adora1(-0.08), P2ry1(-0.18), Adora2a(-0.2), Adora2a(-0.2), Adora2a(-0.2), Adora2a(-0.2), Adcy5(-0.24),
pigmentation	0.0649613	0.177608	0.00226895	0.0178787	40	0.0295346	0.0503149	0.12202	0.437229	0.0676118	a(0.67), Myc(0.18), Kit(0.12), Kit(0.12), Rack1(0.08), Bloc1s3(0.08), Bloc1s3(0.08), Cd63(0.06), Ednrb(0.06), Ednrb(0.06), Dock7(0.06), Eda(0.03), Myo5a(0), Myo5a(0), Hps6(-0.01), Lyst(-0.03), Lyst(-0.03), Bloc1s6(-0.04), Bcl2(-0.06), Arcn1(-0.06), Trappc6a(-0.07), Mlph(-0.07), Hps3(-0.08), Hps1(-0.08), Nf1(-0.09), Nf1(-0.09), Atrn(-0.12), Atrn(-0.12), Szt2(-0.12), Recql4(-0.14), Vps33a(-0.17), F…
translation factor activity, RNA binding	0.0826339	0.298937	0.00235237	0.0184948	13	0.150408	0.0221056	0.0624773	0.280457	0.123457	Cpeb1(0.34), Eif2b3(0.1), Eif2s3x(0.05), Eif4g2(0.03), Cpeb2(0.02), Eef2k(-0.02), Cpeb4(-0.17), Gtf2h3(-0.22), Sox11(-0.37), Mtif3(-0.4), Mtif3(-0.4), Cpeb3(-0.65), Cpeb3(-0.65),
structural molecule activity	0.0394536	0.152051	0.00243925	0.0191354	95	0.451971	0.796053	0.00167626	0.060041	0.00597714	Sprr2f(1.89), Fgb(1.88), Fgg(1.46), Fga(1.06), Krt20(0.67), Krt4(0.6), Krt17(0.59), Nefm(0.5), Cldn23(0.48), Cldn4(0.46), Cldn5(0.45), Krt23(0.44), Cldn7(0.43), Cldn3(0.3), Psmd11(0.25), Krt18(0.21), Anxa1(0.2), Iffo2(0.19), Sntb2(0.17), Cdc42se2(0.17), Cdc42se2(0.17), Nes(0.15), Map7d1(0.15), Lmna(0.12), Vim(0.12), Lmnb1(0.11), Vcl(0.11), Psmd13(0.1), Cdc42se1(0.09), Cltb(0.09), Ctnna1(0.07), Kr…
negative regulation of chondrocyte differentiation	0.0735871	0.287467	0.00251992	0.019681	16	0.0278332	0.104764	0.262117	0.241941	0.038732	Sox9(0.41), Tgfbr1(0.27), Wnt9a(0.1), Wnt9a(0.1), Rarg(0.04), Rarb(-0.01), Ctnnb1(-0.03), Bmp4(-0.15), Ltbp3(-0.18), Grem1(-0.18), Chadl(-0.22), Adamts7(-0.23), Efemp1(-0.33), Gli2(-0.47), Snai2(-0.48), Adamts12(-0.5),
proton-transporting ATPase activity, rotational mechanism	0.0679489	0.273925	0.00252818	0.019702	20	0.00989253	0.147471	0.216018	0.0279519	0.423323	Atp6v0a1(0.17), Atp6v0c(0.09), Atp6v0e(0.07), Atp5e(0.05), Atp6v0b(0.05), Atp6v0a2(0.04), Atp6ap1(0.03), Atp5d(0.03), Atp6v0d1(0.01), Atp6v1f(0.01), Atp6v1h(0.01), Atp5b(-0.06), Atp5c1(-0.06), Atp6v1e1(-0.09), Tcirg1(-0.09), Atp6v0e2(-0.11), Atp5a1(-0.14), Atp6v1a(-0.22), Atp6v0d2(-0.28), Atp6v0a4(-0.32),
regulation of GTPase activity	0.0770645	0.132988	0.00254383	0.0197804	70	0.0239955	0.31949	0.198652	0.106454	0.0422132	Rasip1(0.54), Tbc1d15(0.31), Pot1b(0.27), Efna5(0.26), Efna5(0.26), Rab3gap1(0.26), Vav1(0.2), Vav1(0.2), Rasa2(0.16), Sbf1(0.15), Sod1(0.14), Ralbp1(0.12), Rab3gap2(0.12), Arhgef5(0.1), Tbc1d10b(0.1), Iqgap1(0.09), Crk(0.07), Pafah1b1(0.07), Gapvd1(0.07), Mlst8(0.05), Arhgap1(0.05), Ajuba(0.03), Rictor(0.03), Ephb3(0.01), Als2(0.01), Tsc1(0), Dab2ip(-0.01), Itgb1bp1(-0.02), Ngef(-0.03), Ngef(-0.…
basal plasma membrane	0.0866769	0.179797	0.00260364	0.0201568	36	0.0466134	0.392354	0.0692871	0.043419	0.135197	Cldn4(0.46), Trf(0.37), Ager(0.28), Ldlrap1(0.24), P2ry12(0.2), C5ar2(0.16), Ace(0.14), Bmpr2(0.09), Slc23a2(0.09), Slc23a2(0.09), Tacstd2(0.09), Eps15(0.08), Pkd2(0.05), Erbb2(0.03), Plec(0.02), Dlg1(-0.01), Met(-0.03), Itga9(-0.03), Myo1c(-0.04), Itga6(-0.07), Slco3a1(-0.09), Itgb4(-0.1), Cav1(-0.12), Shroom4(-0.17), Rapgef3(-0.18), Aqp1(-0.21), Aqp1(-0.21), Cd34(-0.4), Ank3(-0.41), Slc23a1(-0.…
serine-type peptidase activity	0.0608914	0.135542	0.00261969	0.0202368	70	0.0961834	0.10185	0.069332	0.27523	0.0558709	F10(1.06), Tmprss9(0.88), Tmprss9(0.88), Htra4(0.63), Plat(0.57), Klk1b9(0.4), Klk8(0.31), St14(0.29), St14(0.29), Prss22(0.27), Klk1(0.22), Rhbdd1(0.22), Pcsk9(0.22), Hgfac(0.16), Prss27(0.16), Sec11a(0.12), Klk1b5(0.11), Corin(0.11), Pcsk4(0.07), Tpp2(0.07), Tmprss2(0.06), Prep(0.05), Prss23(0.04), Dpp9(0.04), Clpp(0.03), Furin(0.02), Proc(0.02), Sec11c(0.01), Pcsk5(0), Immp1l(0), Htra1(-0.02),…
acute-phase response	0.070232	0.304298	0.00262581	0.0202399	19	0.0647592	0.0144409	0.0137743	0.238172	0.646424	Saa3(2.67), Saa1(1.34), Il6(1.08), Serpina3n(0.32), Plscr1(0.24), Stat3(0.11), Stat5b(-0.05), Serpinf2(-0.09), Cd163(-0.14), Lbp(-0.24), Fn1(-0.27), F8(-0.41), Sigirr(-0.42), Serpina1b(-0.53), Serpina1a(-0.54), Saa4(-0.88), Itih4(-1.06), Reg3g(-1.14), Hp(-1.27),
sulfuric ester hydrolase activity	0.0854161	0.308698	0.00265293	0.0203833	12	0.13544	0.24988	0.0154468	0.141407	0.1102	Sulf1(0.47), Arsa(-0.02), Gns(-0.03), Galns(-0.04), Arsb(-0.08), Sulf2(-0.11), Ids(-0.12), Sgsh(-0.31), Sgsh(-0.31), Arsg(-0.33), Arsk(-0.38), Arsi(-0.38),
embryonic skeletal system morphogenesis	0.0561444	0.156327	0.00265593	0.0203833	52	0.0551298	0.366313	0.271689	0.340694	0.00052632	Chst11(0.52), Dscaml1(0.39), Mdfi(0.36), Hoxc9(0.31), Mfsd7b(0.17), Zeb1(0.16), Hoxb2(0.15), Pcgf2(0.12), Wnt9a(0.1), Hoxb6(0.09), Twist1(0.07), Foxc2(0.06), Hoxb4(0.05), Hoxa5(0.02), Mycn(0.02), Hoxa3(0.01), Hoxa7(0.01), Men1(0.01), Dlg1(-0.01), Gli3(-0.03), Hoxb7(-0.03), Hoxb7(-0.03), Hoxb8(-0.03), Hoxb8(-0.03), Bmi1(-0.04), Hoxb3(-0.05), Hoxb3(-0.05), Hoxb5(-0.06), Hoxb5(-0.06), Hoxd9(-0.09), …
cytoskeletal protein binding	0.0741996	0.141822	0.00266317	0.0203946	59	0.0127364	0.333034	0.234569	0.079067	0.0763485	Cdk5r1(1.12), Pacsin3(0.28), Dbn1(0.27), Cdh1(0.26), Msn(0.25), Ezr(0.23), B4galt1(0.21), Cryab(0.18), Dst(0.14), Gabarapl1(0.14), Anxa2(0.08), Capn2(0.07), Coro1b(0.07), Pkd2(0.05), Ptpn4(0.05), Lin7c(0.05), Actr2(0.05), Wasl(0.05), Tor1aip1(0.04), Farp1(0.04), Plec(0.02), Tor1a(0), Tor1a(0), Aldoa(-0.01), Epb41l2(-0.02), Fer(-0.03), Palld(-0.03), Mylip(-0.03), Coro1a(-0.05), Dlg5(-0.05), Capn1(…
regulation of intracellular pH	0.0812937	0.195514	0.00276802	0.0211062	30	0.254921	0.199272	0.0134685	0.026245	0.291788	Slc9a4(0.41), Chp1(0.2), Car2(0.15), Slc9a8(0.14), Trp53(0.08), Slc4a8(0.08), Slc9a2(0.08), Slc9a7(0.06), Slc26a11(0.02), Slc26a4(0.01), Slc4a7(-0.01), Slc4a2(-0.05), Slc4a2(-0.05), Atp5b(-0.06), Slc9a6(-0.06), Slc9a1(-0.11), Slc9a1(-0.11), Slc26a2(-0.16), Slc9a3(-0.17), Slc4a9(-0.18), Slc4a3(-0.22), Slc4a11(-0.23), Slc4a4(-0.26), Slc26a6(-0.31), Slc26a6(-0.31), Slc26a7(-0.32), Slc9a5(-0.35), Slc…
aromatase activity	0.0524931	0.358211	0.00278248	0.021168	11	0.104824	0.212869	0.491251	0.00188121	0.109569	Cyp2b10(1.19), Cyp3a13(0.49), Cyp4a12a(0.38), Cyp4b1(0.16), Cyp2d9(0.08), Cyp2j6(-0.04), Cyp1b1(-0.11), Cyp2j5(-0.21), Cyp2d26(-0.26), Cyp2s1(-0.59), Cyp2u1(-0.65),
cellular response to interferon-gamma	0.0299237	0.270732	0.0027881	0.021168	34	0.131446	0.669063	0.00145899	0.568562	0.00334438	Acod1(1.34), Ccl20(0.91), Ccl22(0.73), Ccl6(0.68), Dapk3(0.14), Dapk3(0.14), Mrc1(0.14), Ccl9(0.1), Rpl13a(0.1), Rpl13a(0.1), Gapdh(0.09), Syncrip(0.06), Ccl25(0.04), Nos2(0.03), Ccl21a(0.03), Ccl5(0.03), Eprs(-0.04), Eprs(-0.04), Dapk1(-0.1), Dapk1(-0.1), Ccl2(-0.17), Ccl11(-0.23), H2-Q7(-0.29), Slc26a6(-0.31), Cx3cl1(-0.32), Gbp5(-0.38), Ccl7(-0.39), Gbp2(-0.43), Gbp3(-0.48), Gbp7(-0.51), Gbp4(…
ciliary base	0.0880998	0.235844	0.00282602	0.0213732	21	0.0924386	0.192194	0.0232757	0.261151	0.086597	Cluap1(0.13), Nek8(0.13), Tulp3(0.09), Ift20(0.07), Ick(0.06), Pqbp1(0.03), Prkacb(-0.02), Rab8a(-0.03), Nphp4(-0.05), Prkaca(-0.07), Ift122(-0.08), Ift88(-0.1), Traf3ip1(-0.1), Nphp3(-0.11), Cep126(-0.13), Ift46(-0.14), Ift52(-0.14), Mok(-0.17), Nphp1(-0.2), Invs(-0.27), Prkar2b(-1.08),
cellular response to X-ray	0.0803917	0.341331	0.00282721	0.0213732	10	0.362366	0.0978975	0.00894847	0.362433	0.0342183	Sfrp2(0.38), Nipbl(0.05), Nucks1(0.04), Ccnd2(-0.02), Xrcc6(-0.21), Xrcc6(-0.21), Xrcc5(-0.21), Xrcc5(-0.21), Atm(-0.51), Sfrp1(-0.67),
DNA-dependent ATPase activity	0.0569026	0.219138	0.00284259	0.0214437	30	0.329865	0.00324669	0.408703	0.0686338	0.0960048	Ighmbp2(0.19), Xrcc2(0.19), Xrcc3(0.14), Gtf2h1(0.08), Gtf2h1(0.08), Bptf(0.06), Mnat1(0.04), Ercc6(0.03), Rbbp4(0), Ercc2(-0.01), Chd8(-0.01), Smarca4(-0.02), Dhx36(-0.02), Ddx11(-0.02), Ercc3(-0.03), Gtf2h2(-0.04), Gtf2h4(-0.06), Cdk7(-0.08), Chd6(-0.14), Rad51d(-0.15), Rad51d(-0.15), Smarcal1(-0.2), Smarcal1(-0.2), Ccnh(-0.2), Gtf2h3(-0.22), Gtf2h3(-0.22), Smarca1(-0.3), Top2a(-0.45), Rad51c(-…
hematopoietic progenitor cell differentiation	0.0666759	0.140845	0.00285213	0.0214699	68	0.105491	0.208337	0.176139	0.445287	0.00114283	Cebpd(0.85), Arl11(0.56), Inhba(0.54), Inhba(0.54), Cited2(0.27), Eml1(0.27), Tgfb1(0.26), Ptprc(0.24), Slc7a6os(0.24), Psen1(0.18), Rrs1(0.16), Papd4(0.16), Ppp4r2(0.14), Rest(0.13), Ston2(0.13), 6330408A02Rik(0.1), Zfat(0.1), Sirpa(0.08), Col24a1(0.08), Eef2(0.06), Gpatch4(0.06), Dock7(0.06), Sin3a(0.05), Srsf4(0.04), Psen2(0.03), Arhgef7(0.03), Adar(0.03), Apobec3(0.03), Zfp784(0.01), Prrc2c(-…
actomyosin structure organization	0.0609859	0.221863	0.00287857	0.0216229	25	0.0453329	0.250505	0.200072	0.381131	0.00384042	Cnn3(0.22), Frmd6(0.16), Myh14(0.13), Cnn2(0.11), Myh9(0.1), Alkbh4(0.06), F11r(0.04), Cdc42bpb(0.01), Cdc42bpa(0), Epb41l2(-0.02), Epb41l4b(-0.09), Epb41l4b(-0.09), Phactr1(-0.1), Phactr1(-0.1), Epb41l4a(-0.11), Myh10(-0.12), Epb41l1(-0.17), Lurap1(-0.18), Limch1(-0.18), Myo18a(-0.23), Trpm7(-0.25), Epb41l5(-0.26), Epb41(-0.31), Epb41l3(-0.58), Cnn1(-0.76),
calcium activated cation channel activity	0.0703308	0.367883	0.00295775	0.0221706	10	0.0144558	0.615484	0.0129306	0.17918	0.132043	Ano6(0.06), Ano6(0.06), Ano10(0.03), Trpm4(-0.02), Trpm4(-0.02), Trpm4(-0.02), Catsper2(-0.35), Ano1(-0.5), Catsper4(-0.68), Trpc3(-1.62),
eye development	0.0826207	0.216178	0.00299675	0.0223682	25	0.106479	0.1129	0.116397	0.0731401	0.148635	Inhbb(1.02), Foxc1(0.19), Foxc1(0.19), Bmp6(0.14), Sh3pxd2b(0.14), Sh3pxd2b(0.14), Atf6(0.09), Bloc1s3(0.08), Hmgb1(0.01), Tgfb2(0), Meis2(-0.02), Bmp7(-0.09), Ift88(-0.1), Sipa1l3(-0.11), Bbs7(-0.2), Fgf9(-0.25), Bmpr1b(-0.3), Slc39a5(-0.34), Hsf4(-0.35), Sall2(-0.43), Chrdl1(-0.77), Rbp4(-0.8), Rbp4(-0.8), Smoc1(-1.28), Smoc1(-1.28),
positive regulation of glycolytic process	0.0862405	0.320626	0.00301425	0.0224514	11	0.0396017	0.0139525	0.156749	0.260531	0.295571	Myc(0.18), P2rx7(0.16), Mif(0.12), Prkaa1(0.02), Insr(-0.11), Prkaa2(-0.17), Entpd5(-0.45), Mlxipl(-0.55), Mlxipl(-0.55), Gpd1(-0.61), Igf1(-0.87),
nuclease activity	0.0515742	0.119104	0.00305654	0.0227186	109	0.437027	0.000738733	0.0278277	0.261028	0.405539	Ercc1(0.62), Isg20(0.32), Rnasel(0.28), Noct(0.24), Usb1(0.22), Zc3h12a(0.21), Pan2(0.2), Rnaseh2a(0.19), Eri1(0.18), Dnase1l3(0.17), Pelo(0.15), Zc3h12c(0.12), Cnot7(0.11), Rbbp8(0.11), Ago2(0.11), Xrn2(0.1), Endod1(0.1), Exosc10(0.09), Pde12(0.09), Endou(0.08), Cnot8(0.08), Dbr1(0.08), Harbi1(0.08), Rexo1(0.07), Exog(0.07), Isg20l2(0.07), Rnaseh1(0.06), Tatdn1(0.06), Elac1(0.06), Apex1(0.05), P…
centrosome	0.0262625	0.0790367	0.00317932	0.0235816	466	0.282268	7.07439e-06	0.454658	0.179207	0.439756	Snx10(1.16), Procr(0.9), Pde4b(0.64), 4921507P07Rik(0.59), Camk2n2(0.55), Plk4(0.52), Rad18(0.47), Plk2(0.42), Ell2(0.4), Klhl21(0.39), Rgcc(0.38), Plk3(0.37), Kif23(0.36), Mdm1(0.35), Mdm1(0.35), Cpeb1(0.34), Nedd1(0.32), Nedd1(0.32), Clic4(0.32), Ric8b(0.32), Ctdp1(0.31), Dnajb3(0.3), Brsk1(0.3), Mapkapk2(0.29), Fgfr1op(0.29), Iqcb1(0.29), Bcl2l1(0.28), Pde4d(0.28), Pcgf5(0.27), Cep170(0.27), N…
regulation of sodium ion transmembrane transporter activity	0.0815331	0.295788	0.0032052	0.0237036	13	0.0108799	0.317973	0.0432715	0.136721	0.302036	Fxyd5(0.28), Ywhah(0.25), Ywhah(0.25), Fgf12(0.21), Fxyd2(-0.04), Ptpn3(-0.15), Fxyd1(-0.17), Fxyd4(-0.31), Cav3(-0.32), Gpd1l(-0.32), Scn1b(-0.33), Scn4b(-1.08), Scn2b(-1.67),
intraciliary transport	0.0504736	0.226903	0.00320917	0.0237036	36	0.140727	0.249298	0.000153281	0.369127	0.345675	Klc3(0.46), Ssna1(0.2), Hspb11(0.13), Cluap1(0.13), Ift20(0.07), Ift20(0.07), Rpgr(0.06), Ick(0.06), Ift57(0.05), Ift57(0.05), Ift74(0.04), Ift74(0.04), Ift81(0.02), Ift81(0.02), Lca5(-0.03), Cep131(-0.07), Ttc30a1(-0.08), Arl3(-0.1), Traf3ip1(-0.1), Traf3ip1(-0.1), Nme7(-0.1), Bbs12(-0.12), Ift22(-0.14), Ift46(-0.14), Ift46(-0.14), Ift52(-0.14), Ttc30b(-0.15), Ttc30b(-0.15), Ift27(-0.16), Ift27(…
Elongator holoenzyme complex	0.0600532	0.376	0.00321902	0.0237268	10	0.518127	0.00243669	0.0558232	0.0254356	0.587396	Elp5(0.2), Ikbkap(0.03), Elp6(-0.01), Elp6(-0.01), Elp2(-0.08), Elp2(-0.08), Elp3(-0.16), Elp3(-0.16), Elp4(-0.28), Elp4(-0.28),
late endosome membrane	0.0983108	0.203177	0.00323511	0.0237959	30	0.0950253	0.21299	0.047682	0.149945	0.100669	Tmem55b(0.1), Vti1b(0.09), Vti1b(0.09), Gosr2(0.09), Anxa2(0.08), Lamtor1(0.08), Lamp2(0.07), Lamp2(0.07), Cd63(0.06), Stx8(0.05), Rab7(0.03), Vamp8(0.02), Ltv1(0.02), March1(0.01), March1(0.01), Vps39(0), Vps36(-0.01), Vps36(-0.01), Snf8(-0.03), Tmem55a(-0.03), Cyb561a3(-0.03), Sppl2a(-0.05), H2-Eb1(-0.06), Rnf13(-0.06), Anxa6(-0.12), Vti1a(-0.12), Stx7(-0.13), Vps41(-0.23), Slc11a2(-0.24), Anxa…
enoyl-CoA hydratase activity	0.0319873	0.457116	0.00325182	0.0238692	10	0.00294795	0.00486384	0.091861	0.350322	0.833433	Echdc2(0.06), Ehhadh(0.02), Echs1(-0.07), Echs1(-0.07), Auh(-0.08), Auh(-0.08), Hadhb(-0.17), Hadhb(-0.17), Hadha(-0.19), Hadha(-0.19),
replication fork processing	0.0616472	0.254172	0.00326365	0.0239064	21	0.165733	0.0477819	0.095702	0.137534	0.147691	Cdk9(0.22), Thoc1(0.09), Pcna(0.07), Nucks1(0.04), Stra13(0.03), Eme2(0), Atrx(-0.02), Bod1l(-0.05), Rtel1(-0.06), Blm(-0.07), Mms22l(-0.1), Fbxo18(-0.13), Fbxo18(-0.13), Wrn(-0.19), Wrn(-0.19), Smarcal1(-0.2), Fancm(-0.22), Primpol(-0.28), Zranb3(-0.45), Rad51(-0.51), Rad51(-0.51),
adult behavior	0.100014	0.229457	0.00334362	0.0244416	21	0.207467	0.057286	0.102523	0.210426	0.0549298	Rnf180(0.43), Nr4a3(0.27), Nrxn2(0.27), Shank3(0.19), Mafg(0.14), Tpgs1(0.03), Bbs4(0.01), Met(-0.03), Pcdh17(-0.03), Bbs2(-0.06), Zfhx2(-0.08), Pten(-0.1), Trmt1l(-0.12), Bbs1(-0.26), Grm7(-0.35), Sptbn2(-0.44), Fgfbp3(-0.67), Shank1(-0.67), Slc1a2(-0.75), Shank2(-0.87), Shank2(-0.87),
pattern specification process	0.0614556	0.177755	0.00337847	0.0246454	38	0.00101875	0.236062	0.129683	0.508822	0.125673	Nog(0.78), Mfng(0.25), Crkl(0.18), Zeb1(0.16), Rnf111(0.14), Bmpr1a(0.11), Chrd(0.11), Shroom3(0.11), Ptch1(0.09), Smad2(0.07), Hoxa5(0.02), Apc(0.01), Hes1(0.01), Hes1(0.01), Disp1(0.01), Hey2(0), Hey2(0), Gli3(-0.03), Hoxd11(-0.03), Bmp7(-0.09), C2cd3(-0.12), Lhx1(-0.14), Lhx1(-0.14), Acvr2b(-0.17), Rfng(-0.18), Smo(-0.18), Ihh(-0.19), Lfng(-0.2), Syngap1(-0.21), Hoxa2(-0.25), Dchs1(-0.25), Asp…
extracellular vesicle	0.0497764	0.192764	0.00342043	0.0249002	44	0.0221183	0.0875897	0.00766009	0.328853	0.574546	Fgb(1.88), Fga(1.06), Apoa1(0.51), Cd9(0.36), Tubb2a(0.32), Sdcbp(0.2), Serpine2(0.17), Itgb2(0.16), Slc12a2(0.15), Tubb4b(0.14), Gnb1(0.13), Vcl(0.11), F5(0.1), Man1b1(0.1), Pkm(0.08), Pdcd6ip(0.05), Gnai2(0.04), Mfge8(0), Apoe(-0.01), Cltc(-0.02), Col12a1(-0.07), Sptan1(-0.08), Dnajc3(-0.08), Rab3a(-0.15), Efemp2(-0.16), Lfng(-0.2), Mgat1(-0.2), Tfrc(-0.26), Ctsf(-0.26), Atp1a1(-0.29), Cbr1(-0.…
defense response to protozoan	0.0285046	0.300527	0.00349936	0.0254225	20	0.189525	0.501322	0.252029	0.383903	1.39006e-05	Il6(1.08), Batf(0.33), Il4ra(0.3), Nras(0.25), Slc11a1(0.21), Cd37(0.11), Hras(0.1), Bcl3(0.05), Lyst(-0.03), Irf8(-0.09), Iigp1(-0.21), Ccdc88b(-0.21), Batf2(-0.25), Cd40(-0.31), Gbp2(-0.43), Gbp3(-0.48), Gbp7(-0.51), Gbp7(-0.51), Gbp9(-0.74), Tlr12(-1.42),
negative regulation of osteoclast differentiation	0.0971594	0.271118	0.00361402	0.026119	15	0.0641418	0.0841383	0.126389	0.358871	0.0545068	Inpp5d(0.29), Ubash3b(0.05), Clec2d(0.01), Mafb(-0.01), Ctnnb1(-0.03), Tob2(-0.08), Fstl3(-0.08), Nf1(-0.09), Ceacam1(-0.12), Tmem178(-0.13), Inpp4b(-0.23), Inpp4b(-0.23), Pik3r1(-0.24), Sfrp1(-0.67), Sfrp1(-0.67),
transferase activity, transferring phosphorus-containing groups	0.0848703	0.343477	0.00361739	0.026119	10	0.0259668	0.142369	0.113711	0.112657	0.283405	Cds2(0.18), Fpgt(0.11), Cds1(0.01), Fuk(0.01), Gnptab(-0.12), Bckdk(-0.24), Ckmt1(-0.26), Trpt1(-0.35), Ckb(-0.46), Ckm(-3.06),
cardiac muscle contraction	0.0835321	0.196788	0.00385018	0.0277432	31	0.018237	0.542712	0.0501963	0.0829126	0.17209	Tnnc1(0.54), Tnnc1(0.54), Cxcr4(0.48), Camk2d(0.42), Ppp1r13l(0.38), Grk2(0.26), Map2k3(0.22), Scn5a(0.07), Kcnh2(0.06), Smad5(0.06), Psen2(0.03), Srsf1(0.02), Taz(-0.01), Met(-0.03), Tpm1(-0.03), Tpm1(-0.03), Gaa(-0.05), Mtor(-0.07), Vegfb(-0.15), Kcnq1(-0.16), Dmd(-0.29), Scn1b(-0.33), Map2k6(-0.35), Atp1b1(-0.43), Atp1a3(-0.46), Tnnt2(-0.51), Ank2(-0.57), Ttn(-0.73), Slc8a1(-0.84), Scn4b(-1.08…
proton-transporting ATP synthase complex, coupling factor F(o)	0.0412974	0.395098	0.0039084	0.0281055	10	0.0256952	0.302032	0.111893	0.000747443	0.818927	Atp5g2(0.26), Atp5l(0.14), Atp5j(-0.04), Atp5j2(-0.05), Atp5g3(-0.05), Atp5k(-0.06), Atp5h(-0.06), Atp5f1(-0.12), Atp5s(-0.19), Atp5g1(-0.31),
nuclear export signal receptor activity	0.0775506	0.380721	0.0039596	0.028416	10	0.188806	0.00702513	0.145368	0.283597	0.165801	Ranbp17(0.25), Xpo5(-0.01), Xpo7(-0.05), Xpo7(-0.05), Nup214(-0.07), Cse1l(-0.08), Xpo1(-0.12), Xpo4(-0.19), Nupl2(-0.22), Nupl2(-0.22),
auditory receptor cell differentiation	0.0924547	0.340682	0.00400352	0.028673	10	0.0499435	0.149834	0.0437873	0.071372	0.470897	Jag1(0.08), Jag1(0.08), Cux1(0.01), Hes1(0.01), Dll1(-0.03), Myo6(-0.25), Myo7a(-0.32), Ush1c(-0.36), Mcoln3(-0.42), Kcnma1(-0.54),
tRNA processing	0.052339	0.160232	0.004015	0.0286971	83	0.808074	0.0130972	0.0829848	0.190208	0.0103755	Rpp25(0.42), Adat3(0.34), Clp1(0.3), Wdr4(0.19), Urm1(0.18), Qtrt1(0.17), Pop4(0.15), Ctu1(0.15), Rpp30(0.14), Qtrtd1(0.14), Rpp21(0.13), Tsen15(0.1), Trmt10c(0.09), Ctu2(0.09), Trit1(0.09), Pop7(0.09), Pus7l(0.09), Trub2(0.09), Dus4l(0.07), Trmt11(0.07), Fdxacb1(0.07), Thg1l(0.06), Thg1l(0.06), Elac1(0.06), Fbl(0.05), Rpp14(0.05), Trmt1(0.05), Tyw5(0.04), Pus10(0.04), Nat10(0.04), Mettl1(0.03), …
coronary vasculature development	0.0712393	0.186127	0.00411887	0.0293211	33	0.0993001	0.311339	0.0388293	0.485176	0.00993343	Prdm1(0.43), Kif7(0.18), Smad6(0.18), Cntrl(0.18), Ap2b1(0.09), Wt1(0.08), Pde2a(0.07), Zbtb14(0.02), Snx17(0.02), Dnm2(0.01), Pcsk5(0), Smarca4(-0.02), Tgfbr3(-0.03), Plxnd1(-0.03), Dctn5(-0.05), Tab1(-0.07), Ndst1(-0.08), Ptk7(-0.08), Fuz(-0.09), Megf8(-0.11), 2410089E03Rik(-0.12), Myh10(-0.12), Bmp4(-0.15), Vegfb(-0.15), Dync2h1(-0.25), Lrp1(-0.26), Sufu(-0.26), Prickle1(-0.28), Gpc3(-0.32), L…
hydrolase activity, acting on acid anhydrides	0.0802027	0.332477	0.00415854	0.0294921	11	0.068765	0.428393	0.018543	0.434572	0.0235322	Chd7(0.26), Chd8(-0.01), Smarca4(-0.02), Chd6(-0.14), Supv3l1(-0.14), Smarca2(-0.16), Ifih1(-0.16), Dhx58(-0.2), Xrcc5(-0.21), Chd9(-0.25), Ddx58(-0.27),
protein localization to cilium	0.0801876	0.246337	0.00415956	0.0294921	21	0.164039	0.049158	0.00668558	0.40668	0.287831	Snx10(1.16), Csnk1d(0.2), Arf4(0.12), Ift20(0.07), Ift20(0.07), Wdr19(0.04), Bbs4(0.01), Ehd1(-0.02), Tulp4(-0.06), Ift122(-0.08), Ift122(-0.08), Atp6v1d(-0.14), Ttc21b(-0.15), Arl6(-0.21), Bbs9(-0.25), Bbs1(-0.26), Bbs1(-0.26), Ift140(-0.3), Wdr35(-0.31), Tbc1d32(-0.39), Rab11fip3(-0.47),
phospholipase C-activating G-protein coupled receptor signaling pathway	0.0488684	0.255152	0.00417478	0.0295408	30	0.078891	0.948885	0.0474301	0.0111778	0.0152	Fpr2(1.55), Fpr1(1.5), Fpr1(1.5), Cxcr2(1.44), Ltb4r1(1.25), Htr1b(0.29), P2ry2(0.26), C5ar2(0.16), Gnb1(0.13), C5ar1(0.11), Tgm2(0.07), Plce1(0.07), Ednrb(0.06), Gnaq(-0.01), Cysltr1(-0.11), P2ry1(-0.18), F2r(-0.19), Ptger3(-0.19), Adra1b(-0.31), Agtr1a(-0.31), Kiss1r(-0.31), Adra1a(-0.33), Npr3(-0.33), Adra1d(-0.36), C3ar1(-0.36), Esr1(-0.45), Pth1r(-0.49), Pth1r(-0.49), Ano1(-0.5), Casr(-1.1),
spectrin binding	0.0929697	0.197517	0.00421494	0.0297654	28	0.188632	0.138965	0.14055	0.347034	0.00711393	Unc13a(0.41), Ptprn(0.37), Camsap1(0.2), Kif3a(0.14), Gnb1(0.13), Dctn2(0.13), Camsap2(0.09), Stx4a(0.07), Nphs1(0.06), Camsap3(0.03), Add2(-0.02), Epb41l2(-0.02), Epb41l2(-0.02), Myo10(-0.07), Sptan1(-0.08), Sptan1(-0.08), Sptan1(-0.08), Add1(-0.14), Ank1(-0.24), Ank1(-0.24), Epb41(-0.31), Epb41(-0.31), Myo7a(-0.32), Ush1c(-0.36), Ank3(-0.41), Ank3(-0.41), Ank2(-0.57), Dmtn(-0.84),
amino acid transmembrane transport	0.0931172	0.24388	0.0042362	0.0298559	19	0.153971	0.01487	0.187388	0.0649452	0.385304	Slc7a11(0.55), Slc7a6(0.26), Slc7a1(0.15), Slc7a13(0.13), Slc7a5(0.12), Slc36a4(0.09), Slc7a3(0.03), Pex3(-0.07), Slc38a9(-0.08), Slc38a9(-0.08), Slc38a10(-0.1), Slc38a6(-0.25), Slc7a2(-0.26), Slc7a8(-0.27), Slc7a9(-0.28), Slc7a4(-0.34), Slc6a18(-0.39), Slc38a4(-0.5), Slc7a7(-0.61),
phosphorus-oxygen lyase activity	0.0702766	0.301395	0.00427421	0.030025	13	0.145515	0.56061	0.00277168	0.133779	0.136915	Adcy1(0.23), Adcy4(0.06), Cd38(0.02), Npr2(-0.02), Gucy1b3(-0.08), Bst1(-0.13), Gucy1a3(-0.14), Adcy6(-0.17), Adcy7(-0.22), Npr1(-0.24), Adcy5(-0.24), Adcy9(-0.25), Adcy3(-0.26),
spindle organization	0.049604	0.289412	0.00447443	0.0313476	18	0.0153849	0.282925	0.0132113	0.174001	0.518959	Ranbp1(0.08), Ntmt1(0.08), Cep72(0.01), Kiz(-0.04), Kiz(-0.04), Ckap5(-0.05), Uvrag(-0.1), Chd3(-0.11), Pcnt(-0.2), Knstrn(-0.36), Aurkb(-0.38), Kif11(-0.39), Aurka(-0.39), Aspm(-0.42), Rgs14(-0.43), Rgs14(-0.43), Spag5(-0.5), Spag5(-0.5),
retinal metabolic process	0.0808659	0.317615	0.00449962	0.0314618	14	0.0584946	0.202327	0.497937	0.00384017	0.220965	Bco1(0.6), Rdh11(0.31), Rdh10(0.11), Aldh8a1(-0.02), Aldh8a1(-0.02), Akr1c18(-0.1), Cyp1b1(-0.11), Cyp1b1(-0.11), Dhrs4(-0.11), Aldh1a2(-0.33), Aldh1a3(-0.33), Bco2(-0.62), Bco2(-0.62), Rbp4(-0.8),
acetylcholine-gated channel complex	0.0978826	0.344775	0.00455492	0.0317856	10	0.240543	0.336576	0.0190824	0.0930173	0.0951674	Chrnb4(0.95), Chrnb4(0.95), Chrnb1(0.31), Chrnb1(0.31), Stxbp5(0.08), Chrnb2(-0.2), Chrnb2(-0.2), Chrna4(-1.02), Chrna4(-1.02), Chrna4(-1.02),
positive regulation of TOR signaling	0.103634	0.212137	0.00476577	0.0331915	27	0.144027	0.0303004	0.289285	0.0864386	0.173752	Rraga(0.17), Rheb(0.12), Rheb(0.12), Mios(0.1), Lamtor1(0.08), Golph3(0.08), Wdr59(0.08), Mlst8(0.05), Lamtor4(0.05), Kdr(0.04), Hdac3(0.03), Lamtor3(0.03), Seh1l(0.03), Rictor(0.03), Sec13(0.01), Rragc(-0.01), Rptor(-0.04), Lamtor2(-0.04), Wdr24(-0.06), Slc38a9(-0.08), Flcn(-0.12), Rragd(-0.17), Lamtor5(-0.25), Rragb(-0.34), Rragb(-0.34), Reln(-0.36), Gas6(-0.53),
DNA helicase activity	0.0722181	0.285494	0.00479713	0.0332921	17	0.515462	0.158539	0.0184013	0.217944	0.024831	Ruvbl2(0.16), Ino80(0.04), Mcm6(0.02), Ruvbl1(0.02), Chd8(-0.01), Mcm4(-0.03), Mcm7(-0.04), Recql5(-0.07), Fbxo18(-0.13), Supv3l1(-0.14), Peo1(-0.15), Peo1(-0.15), Recql(-0.16), Wrn(-0.19), Mcm3(-0.35), Mcm5(-0.37), Mcm2(-0.44),
intraciliary retrograde transport	0.0653321	0.313845	0.00482446	0.033403	15	0.161916	0.0493057	0.00228112	0.648083	0.244216	Ift43(0.31), Ift43(0.31), Ick(0.06), Dynll1(0.04), Wdr19(0.04), Wdr19(0.04), Ift122(-0.08), Ttc21b(-0.15), Ttc21b(-0.15), Dync2h1(-0.25), Bbs1(-0.26), Ift140(-0.3), Ift140(-0.3), Wdr35(-0.31), Wdr35(-0.31),
cellular response to interferon-beta	0.0116124	0.298885	0.00485588	0.0335549	27	0.0485128	0.944258	0.00954421	0.0479329	0.044061	Acod1(1.34), Ifi204(0.34), Ube2g2(0.28), Cdc34(0.16), Tmem173(0.1), Ube2k(0.02), Ddx41(0.02), Irf1(-0.03), Pnpt1(-0.06), Ifi209(-0.08), Trim6(-0.13), Htra2(-0.14), Irgm1(-0.2), Iigp1(-0.21), Igtp(-0.24), Ndufa13(-0.26), Ifi203(-0.33), Aim2(-0.33), Stat1(-0.34), Irgm2(-0.37), Gbp2(-0.43), Gbp3(-0.48), Ifit1(-0.5), Gm4951(-0.56), Ifi47(-0.58), Ifit3(-0.72), F830016B08Rik(-0.89),
dendrite membrane	0.111178	0.301952	0.00490683	0.0338409	12	0.277646	0.174453	0.0585652	0.115652	0.0689372	Slc12a5(0.61), Atf4(0.45), Gabarapl1(0.14), Atp2b1(0.11), Hcn2(-0.11), Kcnc3(-0.11), Sgce(-0.15), Wls(-0.23), Cacna1d(-0.34), Palm(-0.45), Kcnb1(-0.58), Ngfr(-0.83),
lactation	0.100899	0.188525	0.00493986	0.0340024	31	0.101863	0.135047	0.0214073	0.26123	0.232649	Socs2(0.38), Socs2(0.38), Xdh(0.27), Hif1a(0.24), Cdo1(0.1), Creb1(0.09), Gpat4(0.09), Vegfa(0.06), Aprt(0.05), Oxtr(0.04), Nme1(0), Usf2(0), Kalrn(0), Med1(-0.01), Eif2ak3(-0.04), Stat5b(-0.05), Chuk(-0.07), Chuk(-0.07), Ddr1(-0.1), Cav1(-0.12), Stat5a(-0.23), Atp7b(-0.28), Neurl1a(-0.33), Ccnd1(-0.53), Ccnd1(-0.53), Vdr(-0.57), Atp2b2(-0.62), Erbb4(-0.63), Erbb4(-0.63), Prlr(-0.82), Prlr(-0.82),
peroxisome fission	0.0793866	0.359323	0.00503596	0.034539	11	0.0405525	0.0387776	0.0280928	0.28823	0.58836	Acot8(0.07), Pex11g(0.02), Dnm1l(0.02), Fis1(0), Fis1(0), Sec16b(-0.11), Pex19(-0.12), Pex11b(-0.13), Pex11b(-0.13), Pex11a(-0.25), Pex11a(-0.25),
telencephalon development	0.110392	0.248956	0.00503734	0.034539	17	0.0355336	0.197207	0.118821	0.259318	0.101875	Bmp2(0.11), Tctn1(0.08), Ncor2(0.05), Hes1(0.01), Hes1(0.01), Gli3(-0.03), Afdn(-0.05), Pfdn1(-0.05), Kat2a(-0.08), Ift88(-0.1), Cdh2(-0.12), Lhx1(-0.14), Bmp4(-0.15), Cdk5(-0.17), Rpgrip1l(-0.19), Emx1(-0.61), Slc1a2(-0.75),
anatomical structure development	0.0872316	0.340769	0.00505888	0.0346196	10	0.0300035	0.0492136	0.0887237	0.541022	0.165587	Eya3(0.17), Wnt9a(0.1), Dicer1(0.05), Gli3(-0.03), Sparcl1(-0.22), Six4(-0.26), Gli2(-0.47), Gli2(-0.47), Lrp4(-0.49), Wnt4(-0.98),
terminal bouton	0.084901	0.127345	0.00510546	0.034869	72	0.0573581	0.38351	0.0256748	0.0180431	0.569283	Syn1(1), Calca(0.84), Npy(0.61), Unc13a(0.41), Unc13a(0.41), Syt2(0.23), Dnajc5(0.2), Atp6v0a1(0.17), Pfn2(0.16), Kcnc2(0.16), Snap29(0.15), Polg(0.12), Ppp2ca(0.12), Rab5a(0.12), Rpl26(0.1), Stx6(0.1), Scamp1(0.1), Snca(0.05), Stxbp1(0.05), Vamp2(0.05), Napa(0.05), Ap1s1(0.04), Itsn1(0.04), Ap2m1(0.03), Rab7(0.03), Grik5(0.01), App(0), Hspa8(0), P2rx4(0), Snap91(-0.01), Epn1(-0.02), Cltc(-0.02),…
metallocarboxypeptidase activity	0.0907688	0.287278	0.00511505	0.034869	14	0.342896	0.0603394	0.0386424	0.315663	0.061891	Cpe(0.18), Aebp1(0.13), Agbl5(0.08), Agbl5(0.08), Agtpbp1(-0.05), Cpd(-0.06), Ace2(-0.13), Cpn1(-0.2), Agbl3(-0.22), Agbl3(-0.22), Cpm(-0.26), Cpxm1(-0.37), Cpb2(-0.52), Cpxm2(-0.79),
cristae formation	0.0822974	0.326174	0.00516553	0.0351455	13	0.162259	0.0313995	0.0211098	0.233677	0.448072	Oma1(0.04), Apool(0.03), Uqcc3(0.02), Afg3l1(0.01), Taz(-0.01), Afg3l2(-0.03), Apoo(-0.04), Letm1(-0.07), Samm50(-0.1), 2410015M20Rik(-0.11), Immt(-0.14), Chchd6(-0.17), Chchd3(-0.2),
ubiquitin-ubiquitin ligase activity	0.111829	0.304223	0.00534166	0.0362046	12	0.0418375	0.204558	0.323615	0.141149	0.052568	Amfr(0.09), Ube2k(0.02), Ube4b(0.02), Anapc11(0.02), Rbx1(0.01), Ppil2(0.01), Ppil2(0.01), Prpf19(0), Stub1(-0.03), Ubr5(-0.12), Ube4a(-0.15), Ubox5(-0.2),
regulation of proteasomal ubiquitin-dependent protein catabolic process	0.0971765	0.311799	0.00547721	0.0366032	14	0.23564	0.0213843	0.0728024	0.204765	0.253801	Dda1(0.1), Gba(0.06), Ufl1(0.06), Glmn(0.06), Ube2k(0.02), Ube2k(0.02), Rad23b(-0.01), Ubqln4(-0.01), Gna12(-0.07), Gna12(-0.07), Commd1(-0.09), Commd1(-0.09), Rad23a(-0.12), Araf(-0.17),
cellular copper ion homeostasis	0.0929884	0.261576	0.00552305	0.0367995	18	0.180943	0.0241722	0.221806	0.325435	0.0573271	Atox1(0.19), Atox1(0.19), Slc31a2(0.15), Slc31a2(0.15), Arf1(0.08), App(0), App(0), Sco1(-0.03), Commd1(-0.09), Aplp2(-0.1), Prnp(-0.12), Slc31a1(-0.13), Slc31a1(-0.13), Slc11a2(-0.24), Atp7b(-0.28), Atp7a(-0.32), Atp7a(-0.32), Atp7a(-0.32),
tRNA methyltransferase activity	0.0385646	0.178386	0.00557074	0.0370475	78	0.830258	0.000666454	0.11011	0.24313	0.0668298	Setd4(0.52), Prdm1(0.43), Mettl6(0.37), Trmt10a(0.28), Prdm4(0.24), Bmt2(0.21), Mettl22(0.15), Mepce(0.14), Mrm1(0.12), Mettl18(0.11), Trmt10c(0.09), Emg1(0.08), Ftsj3(0.08), Smyd2(0.08), Trmt11(0.07), Nsun5(0.07), Mettl25(0.07), Smyd5(0.07), Mettl2(0.06), Trmt10b(0.06), Mettl13(0.06), Fbl(0.05), Trmt2a(0.05), Setd6(0.05), Wbscr22(0.05), Ftsj1(0.04), Mettl23(0.04), Ece2(0.04), Nop2(0.04), Tfb2m(0…
trans-Golgi network	0.0870244	0.0939774	0.00560942	0.0372347	154	0.0219319	0.0904644	0.293308	0.126314	0.264606	Chac1(0.76), Ap3b2(0.56), Gsap(0.34), Wipi1(0.33), Rac1(0.3), D230025D16Rik(0.29), Rab10(0.27), Ap3s1(0.26), Cdh1(0.26), Tjap1(0.26), Optn(0.25), Rab6a(0.22), Nmnat2(0.22), Ap4m1(0.2), Ap4m1(0.2), Cln3(0.2), Trip10(0.19), Vamp4(0.18), Rab11a(0.18), Plekhj1(0.17), Fam109a(0.17), Arap1(0.16), March9(0.15), Gga3(0.15), Rab31(0.14), Klhl20(0.14), Klhl20(0.14), Ap4e1(0.12), Dennd5a(0.11), Clasp2(0.11)…
glycogen biosynthetic process	0.107984	0.263868	0.00568872	0.0376066	15	0.178141	0.084695	0.126944	0.0774567	0.212072	Nr1d1(0.25), Ptges3(0.19), Akt1(0.11), Gyg(0.09), Akt2(0.03), Phkg2(0.01), Gbe1(-0.11), Gys1(-0.23), Gys1(-0.23), Acadm(-0.29), Gys2(-0.3), Per2(-0.66), Prkag3(-0.77), Phkg1(-0.82), Ppp1r3c(-1.12),
cerebral cortex development	0.106953	0.152451	0.00570021	0.0376066	46	0.0603871	0.0293078	0.298384	0.224658	0.176329	Hif1a(0.24), Nde1(0.22), Nde1(0.22), Psen1(0.18), Tacc2(0.15), Cep120(0.13), Ywhae(0.1), Tacc1(0.1), Pafah1b1(0.07), Pafah1b1(0.07), Pafah1b1(0.07), Atg7(0.06), Dicer1(0.05), Ccdc85c(0.02), Bax(0.01), Bbs4(0.01), Tsc1(0), Tacc3(-0.03), Mkks(-0.03), Hnrnpk(-0.04), Btbd3(-0.04), Lrp6(-0.05), Afdn(-0.05), Afdn(-0.05), Bbs2(-0.06), Mcph1(-0.06), Zbtb18(-0.07), Nf1(-0.09), Cdh2(-0.12), Emx2(-0.12), Cd…
double-strand break repair via nonhomologous end joining	0.0947006	0.225225	0.00570097	0.0376066	26	0.340792	0.0939455	0.0278599	0.192739	0.125209	Lig4(0.22), Lig4(0.22), Psmd14(0.14), Xrcc4(0.14), Xrcc4(0.14), Kdm2a(0.05), Dclre1c(0.04), Dclre1b(0.02), Mre11a(0), Prpf19(0), BC029214(-0.05), Lig3(-0.08), Nhej1(-0.08), Nhej1(-0.08), Nhej1(-0.08), Lig1(-0.13), Rnf8(-0.15), Pola1(-0.19), Pola1(-0.19), Xrcc6(-0.21), Xrcc6(-0.21), Xrcc5(-0.21), Xrcc5(-0.21), Dclre1a(-0.23), Mlh1(-0.29), Prkdc(-0.32),
drug metabolic process	0.112803	0.299527	0.00570795	0.0376066	12	0.0456105	0.151082	0.0561184	0.355853	0.164035	Cyp2b10(1.19), Cyp2e1(0.23), Cyp4f18(0.17), Sult1a1(-0.01), Fmo2(-0.01), Cyp2d22(-0.11), Cad(-0.11), Dck(-0.14), Fmo5(-0.18), Vkorc1(-0.26), Cbr1(-0.31), Fmo1(-0.54),
intestinal absorption	0.0894898	0.298116	0.0057701	0.0379454	14	0.110746	0.0185892	0.0476805	0.11328	0.703787	Tjp2(0.14), Scarb1(0.06), F11r(0.04), F11r(0.04), Ireb2(0.01), Cd36(-0.02), Abcb1a(-0.14), Kcnq1(-0.16), Aco1(-0.22), Slc26a6(-0.31), Mogat2(-0.48), Vdr(-0.57), Slc5a1(-0.85), Gcnt3(-1.56),
axoneme	0.102682	0.149239	0.00594941	0.038898	58	0.0849306	0.0283177	0.0789486	0.566404	0.135604	Dnajb13(0.8), Arl13b(0.2), Map1lc3b(0.16), Sept7(0.15), Kif3a(0.14), Sept2(0.13), Cluap1(0.13), Atg14(0.13), Map4(0.12), Gas8(0.11), Atg16l1(0.1), Tulp3(0.09), Spata7(0.08), Atg5(0.07), Gabarap(0.07), Ttll3(0.07), Atg7(0.06), Ift57(0.05), Lrrc48(0.05), Ccdc114(0.04), Ccdc114(0.04), Bbs5(0.03), Rsph9(0.02), Ambra1(-0.01), Sept9(-0.02), Ctsh(-0.03), Gli3(-0.03), Gli3(-0.03), Pik3r4(-0.03), Lca5(-0.…
establishment of planar polarity	0.0711434	0.269273	0.00595894	0.038898	18	0.240924	0.238601	0.00264628	0.467735	0.09029	Fzd3(0.21), Fzd6(0.18), Alms1(0.12), Ift20(0.07), Dlg3(0.05), Vangl2(0.04), Vangl2(0.04), Wdpcp(-0.07), Ptk7(-0.08), Fuz(-0.09), 2410089E03Rik(-0.12), Rpgrip1l(-0.19), Celsr1(-0.23), Dchs1(-0.25), Wnt5a(-0.27), Ttc8(-0.42), Fat4(-0.52), Trp63(-0.92),
arachidonic acid metabolic process	0.0607578	0.233724	0.00602413	0.0392511	30	0.124648	0.0722875	0.36465	0.0277812	0.228854	Aloxe3(1.37), Aloxe3(1.37), Sstr4(1.04), Alox5(0.77), Cyp2j13(0.31), Cyp4f18(0.17), Cyp2d9(0.08), Pnpla8(0.05), Cyp4f14(0.01), Cyp2d12(0.01), Cyp2j6(-0.04), Cyp2j6(-0.04), Alox12(-0.05), Alox12(-0.05), Alox12(-0.05), Cyp2j9(-0.06), Pla2g4a(-0.08), Cyp1b1(-0.11), Cyp1b1(-0.11), Cyp2d22(-0.11), Cyp2d22(-0.11), Cyp2j11(-0.16), Daglb(-0.19), Daglb(-0.19), Cyp2j5(-0.21), Fads1(-0.22), Dagla(-0.22), Da…
glycosylphosphatidylinositol-N-acetylglucosaminyltransferase (GPI-GnT) complex	0.0962361	0.307693	0.00605184	0.0393592	13	0.155014	0.0849854	0.0136613	0.381002	0.237816	Pigc(0.22), Pigc(0.22), Dpm2(0.2), Pigyl(-0.02), Pigq(-0.1), Pigq(-0.1), Piga(-0.16), Pyurf(-0.16), Pyurf(-0.16), Pigp(-0.21), Pigp(-0.21), Pigh(-0.39), Pigh(-0.39),
smooth muscle cell differentiation	0.0764799	0.266899	0.00606338	0.0393619	20	0.0615415	0.427598	0.306065	0.0371708	0.0555764	Gata6(0.23), Nfatc4(0.21), Myocd(0.11), Myocd(0.11), Nfatc3(0.05), Wnt7b(0.04), Foxf1(0.03), Mkl2(0.02), Mkl1(0.01), Mkl1(0.01), Acvr1(0), Ctnnb1(-0.03), Ntf3(-0.07), Bmp4(-0.15), Mef2c(-0.29), Tmem204(-0.35), Agt(-0.42), Agt(-0.42), Wnt4(-0.98), Wnt4(-0.98),
phospholipid homeostasis	0.0922053	0.336601	0.00610356	0.0395501	10	0.00699887	0.177968	0.168545	0.530088	0.0902995	Apoa1(0.51), Abcg1(0.15), Angptl3(0.06), Angptl3(0.06), Lyst(-0.03), Abca1(-0.11), Gpam(-0.33), Hnf4a(-0.39), Lipg(-0.43), Fabp3(-0.77),
melanocyte differentiation	0.0751154	0.233792	0.00613844	0.0397035	21	0.00768717	0.184542	0.229066	0.0840552	0.437446	Kit(0.12), Ednrb(0.06), Ednrb(0.06), Ednrb(0.06), Edn3(0.01), Myo5a(0), Hps6(-0.01), Gli3(-0.03), Bloc1s6(-0.04), Bcl2(-0.06), Bcl2(-0.06), Mlph(-0.07), Hps1(-0.08), Hps4(-0.11), Mef2c(-0.29), Rab27a(-0.32), Mitf(-0.39), Mitf(-0.39), Mreg(-0.59), 1700112E06Rik(-0.66), 1700112E06Rik(-0.66),
short-term memory	0.0999048	0.336481	0.00626842	0.0403965	10	0.0559667	0.111111	0.156622	0.0755812	0.371219	Rcan1(0.27), Serpinf1(0.13), Pde5a(0.05), Adnp(-0.06), Comt(-0.23), Rcan2(-0.29), Grm7(-0.35), Mdk(-0.43), Calb1(-0.56), Cux2(-0.78),
regulation of heart contraction	0.0653236	0.327972	0.00628859	0.0404528	16	0.0058109	0.430318	0.107185	0.0560122	0.479913	Calca(0.84), Hbegf(0.36), Gja1(0.23), Gnao1(0.22), Hopx(0.22), Sp4(0.17), S100a1(0.05), Thra(-0.21), Thrb(-0.26), Cav3(-0.32), Pln(-0.34), Tnnt2(-0.51), Tnnt2(-0.51), Nos1(-0.56), Dmpk(-0.61), Dmpk(-0.61),
dendritic spine	0.113251	0.105473	0.00634093	0.0407155	98	0.116842	0.28504	0.0599981	0.0861148	0.185431	Cdk5r1(1.12), Pde4b(0.64), Drd1(0.57), Adrb2(0.54), Syt11(0.38), Actn1(0.3), Kcnj2(0.27), Dbn1(0.27), Grk2(0.26), Nr1d1(0.25), Abl2(0.22), Itgb1(0.22), Cnn3(0.22), Arrb2(0.21), Cryab(0.18), Gabbr1(0.18), Ppp1r2(0.17), Arpc2(0.17), Synpo(0.15), Capzb(0.14), Fxr1(0.14), Ppp1cc(0.14), Asic1(0.13), Ppp1r9b(0.13), Arf4(0.12), Lzts1(0.12), Lpar1(0.11), Cript(0.1), Grk3(0.1), Ctnnd1(0.09), Mob4(0.08), G…
dystrophin-associated glycoprotein complex	0.0627758	0.318871	0.00635461	0.0407294	13	0.0220515	0.512917	0.0371799	0.148366	0.222648	Magee1(0.12), Sgcb(0.09), Krt8(0.07), Krt19(-0.04), Dag1(-0.12), Fkrp(-0.12), Sgce(-0.15), Utrn(-0.16), Sspn(-0.18), Dmd(-0.29), Dmd(-0.29), Pgm5(-0.31), Cav3(-0.32),
brain morphogenesis	0.112514	0.23799	0.00656434	0.0419975	19	0.222852	0.0379259	0.204132	0.292244	0.0510915	Fancc(0.19), Shank3(0.19), Psen1(0.18), Pafah1b1(0.07), Psen2(0.03), Bbs4(0.01), Mkks(-0.03), Zfp335(-0.04), Zfp335(-0.04), Afdn(-0.05), Bbs2(-0.06), Pax2(-0.1), Pten(-0.1), Cdh2(-0.12), Foxo3(-0.16), Pcnt(-0.2), Bbs1(-0.26), Emx1(-0.61), Slc6a4(-1.29),
copper ion transport	0.0845055	0.291194	0.00659802	0.0421368	15	0.112703	0.0369635	0.0390086	0.386177	0.311713	Cp(0.26), Atox1(0.19), Cox17(0.09), Mmgt2(0.08), Fkbp4(0.02), Mmgt1(-0.06), Heph(-0.12), Slc31a1(-0.13), Slc11a2(-0.24), Atp7b(-0.28), Atp7b(-0.28), Atp7b(-0.28), Atp7a(-0.32), Atp7a(-0.32), Atp7a(-0.32),
glial cell differentiation	0.0930877	0.30625	0.00673467	0.0428548	12	0.169713	0.136983	0.238429	0.392742	0.00633781	Erbb2(0.03), Notch1(0.03), Plp1(0.02), Fgf2(-0.03), Nrg1(-0.05), Pax2(-0.1), Nfib(-0.11), Cdh2(-0.12), Klf15(-0.24), Reln(-0.36), Metrn(-0.77), Igf1(-0.87),
positive regulation of endothelial cell migration	0.0722645	0.183572	0.00675737	0.042922	44	0.506578	0.51719	0.0198511	0.201903	0.00356408	Itgb3(0.82), Rhob(0.39), Thbs1(0.36), Flt4(0.23), Rock2(0.23), Wnt7a(0.22), Zc3h12a(0.21), Anxa3(0.19), Pdcd6(0.14), Ptk2b(0.1), Ptk2b(0.1), Bmpr2(0.09), Ccbe1(0.09), Foxc2(0.06), Vegfa(0.06), Ets1(0.06), Kdr(0.04), Kdr(0.04), Sparc(0.03), Bcar1(0), Itgb1bp1(-0.02), Prkd2(-0.02), Fgf2(-0.03), Alox12(-0.05), Prkca(-0.14), Bmp4(-0.15), Bmp4(-0.15), Gpld1(-0.15), Atoh8(-0.17), Bcas3(-0.17), Prkd1(-0…
positive regulation of dendrite morphogenesis	0.109744	0.205545	0.00690756	0.0437974	25	0.0385387	0.0798802	0.111993	0.475185	0.146111	Numbl(0.34), Sgk1(0.14), Actr3(0.14), Anapc2(0.13), Rab21(0.11), Ss18l1(0.06), Numb(0.05), Ankrd27(0.05), Caprin2(0.03), Cux1(0.01), Fbxo31(0.01), Met(-0.03), Fbxw8(-0.03), Caprin1(-0.09), Pias2(-0.12), Cul7(-0.15), Ptprf(-0.2), Ptprd(-0.25), Ptprd(-0.25), Ache(-0.29), Cdkl3(-0.32), Cdkl3(-0.32), Cdkl5(-0.34), Epha4(-0.5), Cux2(-0.78),
anterior/posterior pattern specification	0.0678769	0.110679	0.00704846	0.0444666	115	0.00465552	0.0909405	0.237318	0.787166	0.0509897	Arc(0.61), Btg2(0.48), Sfrp2(0.38), Hoxc8(0.31), Hoxc8(0.31), Hoxc9(0.31), Hoxc9(0.31), Tgfbr1(0.27), Hoxc6(0.25), Scmh1(0.22), Zbtb16(0.21), Crkl(0.18), Hipk1(0.18), Hoxb2(0.15), Hoxb2(0.15), Kif3a(0.14), Smad4(0.13), Pcgf2(0.12), Pcgf2(0.12), Bmpr1a(0.11), Hhex(0.1), Bmpr2(0.09), Bmpr2(0.09), Hoxb6(0.09), Hoxb6(0.09), Tulp3(0.09), Hoxb9(0.08), Hoxb9(0.08), Yy1(0.08), Yy1(0.08), Ifitm1(0.08), Sm…
sperm axoneme assembly	0.0951702	0.323617	0.00705081	0.0444666	10	0.0825778	0.491785	0.0158874	0.399693	0.0465866	Ube2b(0.13), Tpgs1(0.03), Bbs2(-0.06), Cep131(-0.07), Ift88(-0.1), Ttll5(-0.14), Iqcg(-0.19), Spag6l(-0.24), Neurl1a(-0.33), Pla2g3(-0.97),
Notch signaling pathway	0.0798063	0.115806	0.00709163	0.0446445	120	0.068744	0.605544	0.0366624	0.163235	0.0675076	Chac1(0.76), Nrarp(0.5), Sox9(0.41), Got1(0.27), Tgfb1(0.26), Notch4(0.2), Dll4(0.2), Foxc1(0.19), Dtx2(0.19), Dtx2(0.19), Psen1(0.18), Psen1(0.18), Nkap(0.15), Cdkn1b(0.13), Epn2(0.12), Bmp2(0.11), Cdh6(0.11), S1pr3(0.11), Akt1s1(0.11), Hhex(0.1), Maml1(0.09), Maml1(0.09), Maml1(0.09), Jag1(0.08), Jag1(0.08), Jag1(0.08), Jag1(0.08), Maml3(0.07), Foxc2(0.06), Rps19(0.06), Mib1(0.06), Adam10(0.05)…
lipid homeostasis	0.0209966	0.23596	0.00713543	0.0448404	32	0.0386419	0.00339872	0.0587307	0.337672	0.836067	Pnpla2(0.34), Nr1h2(0.16), Col4a3bp(0.15), Pkp2(0.14), Usf1(0.08), Angptl3(0.06), Acads(0.04), Nr1d2(0.03), Acadl(0), Usf2(0), Ivd(0), Apoe(-0.01), Acox1(-0.05), Nr1h3(-0.07), Nr1h3(-0.07), Acad8(-0.1), Acaca(-0.1), Acadsb(-0.11), Etfa(-0.12), Gcdh(-0.15), Acadvl(-0.18), Cebpa(-0.18), Acad9(-0.18), Acox3(-0.19), Acad10(-0.21), Acad11(-0.24), Acadm(-0.29), Apoa4(-0.33), Hnf4a(-0.39), Acox2(-0.39),…
protein targeting to lysosome	0.0834058	0.31805	0.00715034	0.0448544	11	0.0890602	0.00304359	0.672096	0.111104	0.269959	Hgs(0.09), Rab7(0.03), Scarb2(0.02), Scarb2(0.02), Snx16(-0.03), Snx16(-0.03), Zfyve16(-0.09), Ap3b1(-0.13), Gcc2(-0.22), Ncoa4(-0.26), Sorl1(-0.27),
mitochondrial electron transport, NADH to ubiquinone	0.0810625	0.317676	0.0072777	0.0455726	13	0.0222217	0.134238	0.158405	0.014139	0.801675	ND2(0.21), ND4(0.21), Ndufa7(0.03), Ndufs6(0), Ndufb9(-0.03), Bdnf(-0.09), Ndufa10(-0.09), Ndufc2(-0.1), Dld(-0.11), Ndufb8(-0.12), Ndufv2(-0.13), Ndufv2(-0.13), Coq9(-0.33),
protein C-terminal carboxyl O-methyltransferase activity	0.0447996	0.173598	0.0073471	0.0458449	75	0.842194	0.000731935	0.126735	0.28486	0.0585619	Setd4(0.52), Prdm1(0.43), Mettl6(0.37), Trmt10a(0.28), Prdm4(0.24), Bmt2(0.21), Mettl22(0.15), Mepce(0.14), Mrm1(0.12), Mettl18(0.11), Trmt10c(0.09), Emg1(0.08), Ftsj3(0.08), Smyd2(0.08), Trmt11(0.07), Nsun5(0.07), Mettl25(0.07), Smyd5(0.07), Mettl2(0.06), Trmt10b(0.06), Mettl13(0.06), Fbl(0.05), Trmt2a(0.05), Setd6(0.05), Wbscr22(0.05), Mettl23(0.04), Ece2(0.04), Nop2(0.04), Tfb2m(0.03), Prmt5(0…
NADPH oxidase complex	0.0935189	0.353891	0.00737997	0.0459689	10	0.0181961	0.0706969	0.239291	0.648268	0.0592689	Ncf1(0.48), Ncf1(0.48), Ncf4(0.13), Cyba(-0.01), Cyba(-0.01), Nox4(-0.23), Cybb(-0.39), Cybb(-0.39), Noxo1(-0.4), Noxo1(-0.4),
cardiac muscle tissue morphogenesis	0.100522	0.334612	0.00741482	0.0461048	10	0.0351399	0.377856	0.444009	0.121077	0.0218708	Ankrd1(0.24), Bmp2(0.11), Zfpm2(0.09), Notch1(0.03), Zfpm1(0.01), Egln1(-0.05), Epor(-0.17), Angpt1(-0.66), Ttn(-0.73), Ttn(-0.73),
protein kinase A binding	0.109444	0.238575	0.00757673	0.0469465	20	0.0367273	0.339482	0.104992	0.172266	0.151978	Akap12(0.79), Myrip(0.26), Myrip(0.26), Akap2(0.23), Akap13(0.17), Rps3(0.09), Akap10(-0.04), Akap11(-0.05), Rara(-0.06), Dact1(-0.06), Dact1(-0.06), Dact2(-0.16), Nbea(-0.17), Akap6(-0.17), Akap6(-0.17), Akap7(-0.25), Lrba(-0.3), Lrrk2(-0.61), Lrrk2(-0.61), Dact3(-0.87),
fibroblast growth factor receptor binding	0.109789	0.294918	0.00771945	0.0477472	12	0.197766	0.388113	0.0266267	0.145948	0.0976828	Fgf21(0.43), Fgf7(0.11), Frs2(-0.02), Fgf2(-0.03), Frs3(-0.09), Flrt2(-0.1), Fgf18(-0.11), Flrt3(-0.13), Fgf1(-0.22), Fgf9(-0.25), Kl(-0.42), Flrt1(-0.9),
activin binding	0.10981	0.303851	0.0077343	0.0477556	16	0.0286672	0.253961	0.265652	0.0411399	0.312934	Fkbp1a(0.19), Acvr1b(0.08), Acvr1b(0.08), Acvr2a(0.02), Acvr2a(0.02), Smad7(0.02), Acvr1(0), Acvr1(0), Tgfbr3(-0.03), Fstl3(-0.08), Fstl3(-0.08), Acvr2b(-0.17), Acvr2b(-0.17), Acvr2b(-0.17), Acvrl1(-0.23), Fst(-0.32),
extracellular fibril organization	0.0723197	0.378098	0.00777801	0.0478585	10	0.0905103	0.589803	0.044394	0.113153	0.0827075	Fkbp1a(0.19), B4galt7(0.14), Cst3(0.02), Mfap5(-0.17), Col3a1(-0.18), Ltbp2(-0.22), Ltbp2(-0.22), Mfap4(-0.48), Tnxb(-0.5), Col5a1(-0.6),
porphyrin-containing compound biosynthetic process	0.114504	0.277977	0.00795065	0.0488357	13	0.133925	0.0366255	0.0388914	0.400317	0.317027	Sptb(0.21), Fech(0.04), Hmbs(0.02), Abcb6(-0.01), Ppox(-0.02), Rsad1(-0.13), Urod(-0.18), Alad(-0.2), Uros(-0.23), Uros(-0.23), Ank1(-0.24), Slc11a2(-0.24), Cpox(-0.34),
flavonoid biosynthetic process	0.0544611	0.372557	0.00804136	0.0493073	10	0.362879	0.000180863	0.103744	0.245176	0.68626	Ugt2b38(0.08), Ugt3a2(-0.09), Ugt8a(-0.15), Ugt1a6a(-0.15), Ugt2b37(-0.18), Ugt2b34(-0.25), Ugt3a1(-0.28), Ugt1a10(-0.67), Ugt1a1(-0.77), Ugt1a2(-1.04),
tissue development	0.101829	0.295995	0.00820896	0.0502479	13	0.53864	0.113692	0.0520804	0.167387	0.0478809	Twsg1(0.09), Wt1(0.08), Eda2r(0.08), Mbd3(-0.01), Gaa(-0.05), Cnpy2(-0.06), Gata2(-0.13), Bmp4(-0.15), Dhcr24(-0.23), Dhcr24(-0.23), Lama1(-0.45), Postn(-0.71), Gata5(-1.12),
exploration behavior	0.124769	0.314427	0.00823233	0.0502836	10	0.148896	0.125274	0.276341	0.225784	0.033899	Itga3(0.26), Abl2(0.22), Shank3(0.19), Atxn3(0.17), Chl1(-0.05), Kmt2a(-0.07), Abat(-0.33), Lrrk2(-0.61), Shank2(-0.87), Chrna4(-1.02),
locomotor rhythm	0.125852	0.314749	0.00824322	0.0502836	10	0.170269	0.18952	0.123019	0.129517	0.107388	Npas2(0.34), Ciart(0.3), Mta1(0.1), Ncoa2(-0.03), Pten(-0.1), Naglu(-0.18), Mapk10(-0.33), Id2(-0.4), Kcnma1(-0.54), Usp2(-0.6),
cell communication	0.133982	0.236381	0.00832287	0.0506207	23	0.138198	0.173031	0.08041	0.269295	0.0957492	Adgrv1(0.44), Ctsl(0.43), Gjb4(0.28), Gja1(0.23), Dll4(0.2), Gja4(0.19), Gjb5(0.12), Jag1(0.08), Kremen1(0.07), Gjc1(0.06), Gjb2(0.06), Gja5(-0.01), Dll1(-0.03), Jag2(-0.03), Nf1(-0.09), Itgb4(-0.1), Gjb3(-0.15), Enpp5(-0.18), Gjb1(-0.27), Frem2(-0.68), Fras1(-0.69), Slc8a1(-0.84), Frem1(-1.22),
positive regulation of activated T cell proliferation	0.0584388	0.316536	0.00833909	0.0506207	19	0.229786	0.480527	0.0220994	0.0588154	0.161784	Ager(0.28), Il18(0.25), Il18(0.25), Tnfsf9(0.23), Tnfsf9(0.23), Cd24a(0.21), Igf2(0.15), Icosl(0.05), Fadd(-0.03), Jak3(-0.04), Stat5b(-0.05), Stat5b(-0.05), Pycard(-0.08), Cd86(-0.13), Stat5a(-0.23), Stat5a(-0.23), Gpam(-0.33), Igfbp2(-0.78), Igf1(-0.87),
negative regulation of fatty acid biosynthetic process	0.108605	0.317637	0.0083414	0.0506207	11	0.0846682	0.0221226	0.138174	0.17547	0.521978	Trib3(0.18), Insig1(0.09), Acadl(0), Insig2(0), Wdtc1(-0.08), Wdtc1(-0.08), Erlin2(-0.08), Acadvl(-0.18), Erlin1(-0.37), Brca1(-0.57), Brca1(-0.57),
nucleotide-excision repair	0.0699088	0.185428	0.00844269	0.0511477	41	0.689988	0.000511556	0.190676	0.211868	0.189765	Ercc1(0.62), Ercc1(0.62), Fancc(0.19), Xpa(0.16), Oraov1(0.12), Rpa2(0.11), Rbbp8(0.11), Ogg1(0.1), Gtf2h1(0.08), Trp53(0.08), Ercc8(0.08), Ercc5(0.05), Dclre1b(0.02), Ddb1(0.01), Gtf2h5(0), Gtf2h5(0), Ercc2(-0.01), Ercc2(-0.01), Rad23b(-0.01), Neil1(-0.02), Ercc3(-0.03), Gtf2h2(-0.04), Neil2(-0.04), Xpc(-0.05), Xpc(-0.05), Xpc(-0.05), Gtf2h4(-0.06), Slx4(-0.08), Ercc4(-0.09), Fan1(-0.1), Rad23a(…
nuclear hormone receptor binding	0.0867207	0.219959	0.00849418	0.0513716	27	0.0435353	0.00911663	0.550065	0.543899	0.0666018	Cry2(0.24), Hif1a(0.24), Sirt1(0.2), Tacc2(0.15), Cry1(0.14), Cry1(0.14), Ep300(0.06), Med1(-0.01), Med1(-0.01), Ctnnb1(-0.03), Ctnnb1(-0.03), Ncoa2(-0.03), Ncoa2(-0.03), Snw1(-0.03), Ncoa3(-0.06), Ncoa3(-0.06), Smarcd3(-0.08), Nrip1(-0.08), Actn4(-0.09), Tcf7l2(-0.13), Ncor1(-0.15), Bcas3(-0.17), Ncoa1(-0.19), Ncoa1(-0.19), Ncoa7(-0.22), Stat1(-0.34), Per2(-0.66),
negative regulation of vascular permeability	0.111062	0.283182	0.00852787	0.0514217	13	0.198996	0.593929	0.0848021	0.0641014	0.0334835	Adm(0.13), Ptprj(0.1), Pde2a(0.07), Pde3a(0.03), Ramp2(0.01), Ramp2(0.01), Arhgap35(-0.05), Ceacam1(-0.12), Nr3c1(-0.13), Adora2a(-0.2), Slit2(-0.44), Angpt1(-0.66), Angpt1(-0.66),
protein targeting to peroxisome	0.115037	0.32244	0.00855168	0.0514217	10	0.11405	0.032222	0.459525	0.0613342	0.263632	Zfand6(0.12), Pex5(0.02), Pex12(0.02), Pex16(0.01), Pex6(-0.09), Pex19(-0.12), Pex7(-0.15), Lonp2(-0.32), Lonp2(-0.32), Pex1(-0.34),
inositol phosphate dephosphorylation	0.13137	0.259814	0.00855766	0.0514217	15	0.162853	0.0646368	0.118553	0.160148	0.256103	Inpp1(0.14), Impa1(0.04), Impa1(0.04), Mtmr2(0.03), Inpp5a(0.02), Inpp5a(0.02), Synj1(-0.01), Inpp5e(-0.07), Synj2(-0.08), Pten(-0.1), Mtmr7(-0.11), Inpp5k(-0.15), Inpp4b(-0.23), Impa2(-0.56), Impa2(-0.56),
fatty acid ligase activity	0.091939	0.320586	0.00856059	0.0514217	11	0.0520925	0.0180517	0.186982	0.266306	0.461265	Slc27a4(0.12), Acsm3(0.08), Acsm1(-0.03), Acsf3(-0.07), Suclg2(-0.1), Slc27a2(-0.1), Sucla2(-0.11), Aasdh(-0.18), Slc27a3(-0.38), Acsf2(-0.46), Slc27a1(-0.5),
amino acid binding	0.0920706	0.227741	0.00858975	0.0514772	22	0.227031	0.0146987	0.0829337	0.0925556	0.621477	Hdc(0.82), Aars(0.09), Aars(0.09), Mtr(0.03), Got2(0.02), Kars(0.01), Aars2(-0.03), Mat2a(-0.05), Ass1(-0.06), Ddah2(-0.07), Cad(-0.11), Gfpt1(-0.12), Gchfr(-0.12), Pah(-0.16), Ddah1(-0.16), Ddc(-0.17), Shmt2(-0.24), Prodh(-0.51), Shmt1(-0.52), Dpys(-0.59), Dpys(-0.59), Slc1a3(-0.75),
transaminase activity	0.0788099	0.255002	0.00859893	0.0514772	19	0.101622	0.00500951	0.160474	0.172343	0.676407	Psat1(0.36), Gfpt2(0.28), Got1(0.27), Kyat1(0.11), Tgm2(0.07), Got2(0.02), Agxt2(-0.05), Phykpl(-0.1), Gfpt1(-0.12), Aadat(-0.13), Bcat2(-0.16), Gpt(-0.16), Kyat3(-0.2), Oat(-0.25), Abat(-0.33), Etnppl(-0.43), Gpt2(-0.5), Amt(-0.6), Bcat1(-0.67),
ATP-dependent peptidase activity	0.0993682	0.329988	0.00864572	0.0516699	11	0.144927	0.0115492	0.264306	0.255414	0.240426	Lonrf3(0.08), Afg3l1(0.01), Crbn(0), Yme1l1(-0.02), Spg7(-0.02), Afg3l2(-0.03), Lonp1(-0.07), Lonp1(-0.07), Lonp2(-0.32), Clpx(-0.34), Clpx(-0.34),
organic anion transport	0.0170493	0.442134	0.00877114	0.052331	14	0.456766	0.000689656	0.126769	0.0466145	0.793024	Slco1a1(0.44), Slc22a7(0.24), Slc22a7(0.24), Slco4a1(0.2), Abcc5(0.06), Slco3a1(-0.09), Slc17a3(-0.11), Slc22a6(-0.24), Slc22a6(-0.24), Slc22a6(-0.24), Slc22a6(-0.24), Slco4c1(-0.33), Slc22a19(-0.41), Slco2b1(-0.5),
phosphatidylinositol metabolic process	0.103484	0.22495	0.00880867	0.0524664	21	0.462524	0.203953	0.340606	0.0431281	0.0119264	Drd1(0.57), Plek(0.21), Pip5k1a(0.16), Pitpnc1(0.05), Mboat7(0.04), Pip4k2b(0.04), Pip5k1c(0.03), Mtmr2(0.03), Synj1(-0.01), Synj1(-0.01), Pip4k2c(-0.03), Inpp5e(-0.07), Pikfyve(-0.08), Fig4(-0.17), Pip4k2a(-0.18), Csf1r(-0.2), Ip6k3(-0.26), Pdgfrb(-0.34), Pip5k1b(-0.34), Plcd4(-0.57), Plch2(-0.91),
negative regulation of endoplasmic reticulum stress-induced intrinsic apoptotic signaling pathway	0.0858773	0.274232	0.00891186	0.0529918	23	0.055384	0.023472	0.21161	0.659831	0.0921841	Xbp1(0.19), Ptpn1(0.14), Creb3l1(0.11), Creb3l1(0.11), Ikbkg(0.1), Txndc12(0.09), Syvn1(0.08), Syvn1(0.08), Wfs1(0.05), Creb3(0.02), Park7(0.01), Park7(0.01), Vimp(0), Tmbim6(-0.02), Tmbim6(-0.02), Grina(-0.04), Grina(-0.04), Opa1(-0.21), Opa1(-0.21), Herpud1(-0.23), Park2(-0.42), Park2(-0.42), Lrrk2(-0.61),
dopaminergic neuron differentiation	0.105648	0.262121	0.00893399	0.0530343	20	0.0317478	0.0346412	0.159712	0.60128	0.188209	Nr4a2(0.32), Nr4a2(0.32), Rac1(0.3), Hif1a(0.24), Hif1a(0.24), Manf(0.22), Vegfa(0.06), Lrp6(-0.05), Lmx1b(-0.07), Lmx1b(-0.07), Lmx1b(-0.07), Pax2(-0.1), Wnt5a(-0.27), Wnt5a(-0.27), Wnt5a(-0.27), Tshr(-0.3), Cdnf(-0.43), Sfrp1(-0.67), Vegfd(-0.8), Cxcl12(-0.81),
neutral amino acid transmembrane transporter activity	0.0730717	0.306001	0.00898739	0.0532619	13	0.156257	0.329964	0.566847	0.0043581	0.082838	Slc43a1(0.42), Slc43a1(0.42), Slc7a13(0.13), Slc7a5(0.12), Slc1a4(0.04), Slc3a2(0.01), Slc1a5(-0.02), Slc6a19(-0.05), Slc43a2(-0.26), Slc7a8(-0.27), Slc7a9(-0.28), Slc7a9(-0.28), Slc36a1(-0.37),
actin binding	0.0650645	0.0899474	0.00914711	0.0540275	302	0.0941375	0.489626	0.0464586	0.696581	0.00281207	Mefv(1.34), Arc(0.61), Nos3(0.53), Marcksl1(0.49), Cxcr4(0.48), Ppp1r18(0.37), Tpm4(0.37), Pstpip1(0.33), Ceacam2(0.33), Arpc1b(0.32), Enc1(0.31), Fmnl2(0.31), Actn1(0.3), Myo3b(0.3), Fxyd5(0.28), Tpm3(0.28), Was(0.27), Dbn1(0.27), Gmfg(0.27), Spire2(0.27), Myo9b(0.26), Myrip(0.26), Fhl3(0.25), Msn(0.25), Ywhah(0.25), Twf2(0.25), Tns4(0.25), Impact(0.24), Arpc5(0.24), Emd(0.23), Ezr(0.23), Arpc3(…
fructose 6-phosphate metabolic process	0.115259	0.291065	0.009318	0.0548287	12	0.0883498	0.0688675	0.190726	0.217477	0.220756	Taldo1(0.32), Gfpt2(0.28), Pfkp(0.07), Fbp1(-0.05), Fbp1(-0.05), Gfpt1(-0.12), Gfpt1(-0.12), Pfkl(-0.19), Pfkl(-0.19), Gnpda1(-0.26), Fbp2(-0.35), Pfkm(-0.58),
cAMP-mediated signaling	0.0814694	0.203827	0.00932925	0.0548287	26	0.246751	0.434054	0.0785673	0.506473	0.00130406	Gal(1.34), Sox9(0.41), Adcy1(0.23), Rims2(0.21), Pde2a(0.07), Pde2a(0.07), Pde2a(0.07), Adcy4(0.06), Ndufs4(0.03), Pde3a(0.03), Rapgef4(0.03), Adcyap1r1(0), Rapgef2(-0.02), Rapgef2(-0.02), Ksr1(-0.09), Eif4ebp2(-0.13), Dgkq(-0.14), Adcy6(-0.17), Adcy7(-0.22), Adcy5(-0.24), Adcy9(-0.25), Adcy3(-0.26), Slc9a3r1(-0.28), Slc9a3r1(-0.28), Npr3(-0.33), Pclo(-0.39),
(R)-2-hydroxyglutarate dehydrogenase activity	0.106994	0.216948	0.00955599	0.0559946	22	0.271453	0.0318172	0.165227	0.231391	0.142482	Rdh12(1.22), Akr1c21(0.71), Hsd3b7(0.24), Sdr42e1(0.13), Kcnab1(0.1), Ctbp1(0.07), Rdh13(-0.03), Cbr4(-0.06), Bdh2(-0.07), Rdh14(-0.07), H2-Ke6(-0.08), Adh5(-0.09), Sdr39u1(-0.09), Htatip2(-0.12), D2hgdh(-0.17), D2hgdh(-0.17), Aifm1(-0.21), Wwox(-0.21), Idh1(-0.24), Kcnab2(-0.24), Akr1c13(-0.24), Hsd11b2(-1.29),
RNA polymerase II core binding	0.127355	0.222088	0.00955928	0.0559946	23	0.197952	0.0214468	0.333072	0.242484	0.108212	Brd4(0.21), Pcf11(0.11), Ago2(0.11), Wac(0.09), Smyd2(0.08), Paf1(0.05), Ikbkap(0.03), Ctr9(0.01), Cdc73(0.01), 2700060E02Rik(0), Elof1(-0.01), Rprd1b(-0.01), Uvssa(-0.03), Zfp326(-0.04), Zfp326(-0.04), Ccar2(-0.05), Recql5(-0.07), Elp2(-0.08), Smyd3(-0.14), Ago1(-0.14), Elp3(-0.16), Elp4(-0.28), Elp4(-0.28),
integral component of mitochondrial outer membrane	0.113206	0.229191	0.00978541	0.0572244	20	0.24887	0.0231908	0.169622	0.128406	0.322588	Tomm7(0.18), Bak1(0.07), Bnip3(0.04), Mul1(0.04), Cpt1a(0.03), Pink1(0.02), Tomm22(0.02), Fis1(0), Abcb6(-0.01), Tomm40(-0.04), Fundc1(-0.04), Fundc1(-0.04), Rhot1(-0.08), Synj2bp(-0.09), Fundc2(-0.11), Armcx3(-0.13), Rhot2(-0.22), Tomm20(-0.24), Dmpk(-0.61), Dmpk(-0.61),
sodium:proton antiporter activity	0.113111	0.265329	0.0098685	0.0576151	15	0.0450113	0.491146	0.121732	0.114651	0.12988	Slc9a4(0.41), Slc9a8(0.14), Slc9a2(0.08), Slc9a2(0.08), Slc9a7(0.06), Slc9a7(0.06), Slc9a6(-0.06), Slc9a1(-0.11), Slc9a1(-0.11), Slc9a1(-0.11), Slc9a3(-0.17), Slc9a3(-0.17), Slc9a5(-0.35), Slc9a5(-0.35), Slc9a9(-0.61),
mitotic spindle pole	0.0596089	0.322346	0.00989372	0.0576672	14	0.0583971	0.0578766	0.324798	0.457469	0.0657173	Eml1(0.27), Cntrl(0.18), Nin(0.04), Cdk5rap2(-0.11), Gpsm2(-0.12), Numa1(-0.12), Kif20b(-0.18), Map10(-0.23), Map10(-0.23), Ttc28(-0.34), Aurkb(-0.38), Aspm(-0.42), Aspm(-0.42), Fam83d(-0.58),
apical part of cell	0.0986985	0.106694	0.0101323	0.0589608	107	0.0649836	0.0641067	0.277241	0.405156	0.0926954	Plat(0.57), Nos3(0.53), Spp1(0.53), Acpp(0.45), Ctsl(0.43), Hfe(0.39), Emp2(0.37), Nedd1(0.32), Clic4(0.32), Cdh1(0.26), Msn(0.25), Msn(0.25), Ezr(0.23), Ezr(0.23), Fzd3(0.21), Mgst1(0.2), Fzd6(0.18), Slc25a27(0.16), C5ar2(0.16), Car2(0.15), Svbp(0.14), Cdc42(0.12), Homer1(0.12), Adgrf5(0.12), C5ar1(0.11), Shroom3(0.11), Atp2b1(0.11), Tjp1(0.1), Tjp1(0.1), Jag1(0.08), Dvl2(0.07), Crb3(0.07), Itpr…
neurotransmitter:sodium symporter activity	0.077381	0.345148	0.0101986	0.0592493	13	0.265702	0.00972378	0.378488	0.105263	0.254282	Slc6a14(1.36), Slc6a15(0.31), Slc6a12(0.27), Slc6a17(0.25), Slc6a9(0.19), Slc6a19(-0.05), Slc6a20a(-0.06), Slc6a8(-0.14), Slc6a6(-0.22), Slc6a20b(-0.36), Slc6a18(-0.39), Slc6a13(-0.61), Slc6a4(-1.29),
nitric-oxide synthase binding	0.117322	0.213413	0.0104084	0.0603689	24	0.0292842	0.31472	0.118171	0.487561	0.0571795	Nos3(0.53), Camk2d(0.42), Arg2(0.18), Calm2(0.16), Calm1(0.15), Actb(0.11), Scn5a(0.07), Nos2(0.03), Dnm2(0.01), Ctnnb1(-0.03), Cd74(-0.05), Calm3(-0.09), Nos1ap(-0.1), Nos1ap(-0.1), Cav1(-0.12), Cav1(-0.12), Cdh2(-0.12), Dmd(-0.29), Snta1(-0.3), Cav3(-0.32), Dnm1(-0.33), Atp2b4(-0.56), Dnm3(-0.59), Slc6a4(-1.29),
cilium movement	0.115589	0.264177	0.0104586	0.0604616	15	0.223783	0.0143445	0.162785	0.45579	0.130758	Dnah10(0.46), Gas8(0.11), Dnaaf5(0.07), Dnaaf5(0.07), Ccdc114(0.04), Ccdc114(0.04), Rsph9(0.02), Rsph9(0.02), Dync1h1(-0.04), Tmem141(-0.23), Ccdc103(-0.31), Ropn1l(-0.38), Celsr2(-0.52), Ccdc39(-0.6), Ccdc39(-0.6),
male genitalia development	0.128494	0.308271	0.0105106	0.0605859	11	0.16455	0.0356304	0.118141	0.427456	0.155524	Bmp6(0.14), Wt1(0.08), Lgr4(0.03), Ctnnb1(-0.03), Tbx3(-0.08), Asb1(-0.22), Dhcr24(-0.23), Pdgfra(-0.34), Wnt9b(-0.35), Tex15(-0.5), Srd5a2(-0.73),
bone mineralization	0.102507	0.226059	0.0105315	0.0605859	24	0.0109799	0.439667	0.368024	0.0533136	0.222203	Ptgs2(1.16), Wnt11(0.8), Sbds(0.28), Sbno2(0.22), Fbxl15(0.2), Bmp2(0.11), Bmp2(0.11), Pkdcc(0.11), Clec3b(0.09), Fgfr2(0.08), Lgr4(0.03), Ercc2(-0.01), Klf10(-0.02), Eif2ak3(-0.04), Tcf7l2(-0.13), Mmp13(-0.15), Aspn(-0.16), Fgfr3(-0.3), Gpc3(-0.32), Mtss1(-0.39), Pth1r(-0.49), Dnm3os(-0.59), Axin2(-0.75), Ptn(-1.43),
endoplasmic reticulum lumen	0.0765364	0.16271	0.0105497	0.0605921	53	0.178093	0.0104397	0.0171586	0.445599	0.628962	Hspa5(0.3), Rdh5(0.28), Tor1b(0.19), Tor1b(0.19), Pdia6(0.18), Lyz2(0.15), Tmem43(0.14), Calr(0.11), Calr(0.11), Calu(0.09), Txndc12(0.09), Erp44(0.09), Tor2a(0.08), Tor2a(0.08), Hsp90b1(0.05), Dnajc1(0.03), Dnajc10(0.03), Erp29(0.01), Tor1a(0), Tor1a(0), Sep15(0), Sep15(0), Txndc5(0), Os9(0), Os9(0), Pdia4(-0.03), Kdelc1(-0.05), Rnaset2b(-0.07), Erap1(-0.07), Erap1(-0.07), Dnajc3(-0.08), Poglut1…
central nervous system projection neuron axonogenesis	0.0690236	0.356497	0.0109386	0.0625216	10	0.360666	0.774238	0.00315595	0.402985	0.00545422	Nr4a2(0.32), Ephb3(0.01), Ephb2(-0.07), Mycbp2(-0.13), Ephb1(-0.15), Ephb1(-0.15), Chrnb2(-0.2), Slit2(-0.44), Dclk1(-0.55), Bhlhe22(-0.67),
coenzyme F390-A hydrolase activity	0.127815	0.188231	0.0110674	0.0629524	28	0.135853	0.0498995	0.179907	0.24621	0.220926	Mblac1(0.27), Aptx(0.22), Abhd4(0.2), Dcp1a(0.16), Abhd17b(0.16), Ndst2(0.15), Dcp1b(0.1), Hint1(0.07), Abhd17a(0.04), Dffb(0.01), Abhd11(0), Abhd13(-0.01), Hint2(-0.05), Ndst1(-0.08), Fahd2a(-0.09), Pigk(-0.11), Mest(-0.13), Abhd14a(-0.13), Abhd16a(-0.13), Nudt13(-0.14), Rbbp9(-0.16), Hint3(-0.17), Lactb2(-0.18), Mblac2(-0.21), Abhd14b(-0.24), Pnkd(-0.25), Abhd8(-0.27), Abhd17c(-0.29),
coenzyme F390-G hydrolase activity	0.127815	0.188231	0.0110674	0.0629524	28	0.135853	0.0498995	0.179907	0.24621	0.220926	Mblac1(0.27), Aptx(0.22), Abhd4(0.2), Dcp1a(0.16), Abhd17b(0.16), Ndst2(0.15), Dcp1b(0.1), Hint1(0.07), Abhd17a(0.04), Dffb(0.01), Abhd11(0), Abhd13(-0.01), Hint2(-0.05), Ndst1(-0.08), Fahd2a(-0.09), Pigk(-0.11), Mest(-0.13), Abhd14a(-0.13), Abhd16a(-0.13), Nudt13(-0.14), Rbbp9(-0.16), Hint3(-0.17), Lactb2(-0.18), Mblac2(-0.21), Abhd14b(-0.24), Pnkd(-0.25), Abhd8(-0.27), Abhd17c(-0.29),
olfactory bulb development	0.113432	0.266467	0.0111254	0.0631806	14	0.208803	0.0971759	0.049835	0.535277	0.0741614	Sema3a(0.71), Eomes(0.57), Chd7(0.26), Ski(-0.01), Ext1(-0.02), Agtpbp1(-0.05), Sall1(-0.15), Rpgrip1l(-0.19), Csf1r(-0.2), Pcnt(-0.2), Id2(-0.4), Ttc8(-0.42), Slit2(-0.44), Lrrk2(-0.61),
oxaloacetate metabolic process	0.0781469	0.302936	0.0114027	0.0645343	14	0.100593	0.0352598	0.113226	0.16212	0.575839	Got1(0.27), Got2(0.02), Acly(0.02), Mdh2(0.01), Stat5b(-0.05), Cs(-0.11), Nit2(-0.11), Pck1(-0.12), Pck2(-0.12), Mdh1(-0.16), Mdh1(-0.16), Pcx(-0.18), Stat5a(-0.23), Ghr(-0.3),
canonical Wnt signaling pathway	0.0733217	0.13378	0.0114126	0.0645343	99	0.0172244	0.679543	0.464585	0.193764	0.0064103	Wnt11(0.8), Sox4(0.67), Smad3(0.35), Fzd2(0.27), Fzd2(0.27), Klf4(0.24), Sdc1(0.24), Wnt7a(0.22), Wnt7a(0.22), Fzd3(0.21), Fzd3(0.21), Tcf7(0.21), Fzd5(0.18), Fzd5(0.18), Fzd6(0.18), Myc(0.18), Psen1(0.18), Tbl1xr1(0.14), Otulin(0.14), Axin1(0.13), Axin1(0.13), Ube2b(0.13), Pygo2(0.13), Cdc42(0.12), Wnt9a(0.1), Fzd8(0.08), Fzd8(0.08), Fzd8(0.08), Fzd8(0.08), Hoxb9(0.08), Stk11(0.08), Gsk3b(0.08),…
protein C-terminal leucine carboxyl O-methyltransferase activity	0.0513663	0.174773	0.0114184	0.0645343	74	0.8462	0.000911537	0.163722	0.280335	0.0761948	Setd4(0.52), Prdm1(0.43), Mettl6(0.37), Trmt10a(0.28), Prdm4(0.24), Bmt2(0.21), Mettl22(0.15), Mepce(0.14), Mrm1(0.12), Mettl18(0.11), Trmt10c(0.09), Emg1(0.08), Ftsj3(0.08), Smyd2(0.08), Trmt11(0.07), Nsun5(0.07), Mettl25(0.07), Smyd5(0.07), Mettl2(0.06), Trmt10b(0.06), Mettl13(0.06), Fbl(0.05), Trmt2a(0.05), Setd6(0.05), Wbscr22(0.05), Mettl23(0.04), Ece2(0.04), Nop2(0.04), Tfb2m(0.03), Prmt5(0…
protein kinase A regulatory subunit binding	0.131758	0.252516	0.0115035	0.0649111	15	0.0768399	0.117738	0.288811	0.0829841	0.298703	Ezr(0.23), Acbd3(0.12), Akap8(0.03), Akap8(0.03), Arfgef1(-0.01), Akap11(-0.05), Prkaca(-0.07), Pja2(-0.08), Akap9(-0.12), Arfgef2(-0.15), Kcnq1(-0.16), Akap6(-0.17), Akap7(-0.25), Akap7(-0.25), Akap1(-0.38),
motor neuron axon guidance	0.102281	0.24137	0.0117171	0.0659064	21	0.0486498	0.67679	0.0722749	0.299088	0.0299093	Nog(0.78), Sema3a(0.71), Cxcr4(0.48), Etv4(0.13), Kif5c(0.12), Foxp1(0.06), Erbb2(0.03), Egr2(0.01), Alcam(0), Chn1(-0.04), Mycbp2(-0.13), Lhx1(-0.14), Cdk5(-0.17), Nrp1(-0.23), Rnf165(-0.23), Hoxa2(-0.25), Plxna4(-0.36), Hoxa1(-0.44), Slit2(-0.44), Epha4(-0.5), Cxcl12(-0.81),
intraciliary transport particle A	0.0857223	0.355449	0.0117959	0.066244	13	0.0744817	0.0969688	0.00442557	0.771114	0.328389	Ift43(0.31), Ift43(0.31), Tulp3(0.09), Wdr19(0.04), Wdr19(0.04), Ift122(-0.08), Ift122(-0.08), Ttc21b(-0.15), Ttc21b(-0.15), Ift140(-0.3), Ift140(-0.3), Wdr35(-0.31), Wdr35(-0.31),
metalloendopeptidase inhibitor activity	0.0651914	0.366723	0.0118521	0.0664535	11	0.110434	0.928448	0.0855098	0.131544	0.00247868	Ngf(0.25), Timp1(0.21), Timp1(0.21), Lxn(0.17), Fetub(0.03), Bst2(-0.11), Reck(-0.28), Timp2(-0.34), Timp2(-0.34), Timp2(-0.34), Timp3(-0.41),
axon extension involved in axon guidance	0.0863196	0.350763	0.0118707	0.0664535	10	0.468965	0.378825	0.243166	0.076607	0.00545561	Sema3a(0.71), Sema3f(0.3), Tpbgl(0.09), Nrp2(-0.08), Smo(-0.18), Nrp1(-0.23), Slit3(-0.26), Slit3(-0.26), Slit2(-0.44), Slit2(-0.44),
negative regulation of programmed cell death	0.105206	0.27612	0.0119529	0.0667823	15	0.0167846	0.651279	0.0517108	0.346142	0.0985611	Kit(0.12), Kit(0.12), Bnip3l(0.08), Tigar(0.08), Vegfa(0.06), Wfs1(0.05), Pax2(-0.1), Dcps(-0.12), Tmem132a(-0.15), Dnaja3(-0.24), Plcg2(-0.25), Kank2(-0.26), Mecom(-0.31), Amigo2(-0.32), Amigo2(-0.32),
ventricular system development	0.118887	0.233256	0.012056	0.0671721	18	0.169014	0.322804	0.143408	0.21153	0.0392978	Anp32b(0.23), Sema6d(0.09), Sema6d(0.09), Mnat1(0.04), Mboat7(0.04), Bbs4(0.01), Mecp2(0), Dpcd(-0.01), Rapgef2(-0.02), Ulk4(-0.12), Ttc21b(-0.15), Spag6l(-0.24), Bbs1(-0.26), Celsr2(-0.52), Nme5(-0.54), Ttn(-0.73), Kif27(-0.86), Cenpf(-1.64),
sialyltransferase activity	0.112105	0.268087	0.012127	0.0674456	17	0.26777	0.545579	0.0208233	0.0324035	0.258056	St3gal1(0.2), St3gal4(0.17), St3gal5(0.15), St8sia4(0.14), St6galnac4(0.06), St3gal6(0.04), St6gal1(0.03), St6gal1(0.03), St3gal2(0), St3gal3(-0.12), St8sia6(-0.15), St6galnac2(-0.16), St6galnac3(-0.51), St6galnac6(-0.51), St6galnac6(-0.51), St6galnac5(-0.52), St8sia1(-0.94),
stereocilium	0.10436	0.222956	0.0121623	0.0674456	23	0.108015	0.717198	0.0592893	0.107279	0.0580885	Dock4(0.59), Adgrv1(0.44), Twf2(0.25), Pls3(0.15), Pafah1b1(0.07), Ift20(0.07), Slc4a7(-0.01), Whrn(-0.03), Whrn(-0.03), Myo1c(-0.04), Atp8b1(-0.06), Bbs2(-0.06), Tprn(-0.07), Rdx(-0.1), Eps8(-0.22), Prom1(-0.22), Cib2(-0.23), Cib2(-0.23), Slc9a3r2(-0.25), Slc9a3r1(-0.28), Myo7a(-0.32), Clic5(-0.35), Ush1c(-0.36),
phospholipid efflux	0.0925131	0.294635	0.0125083	0.0688251	16	0.0059569	0.0718374	0.121426	0.690822	0.357663	Apoa1(0.51), Apoa1(0.51), Abcg1(0.15), Abca7(0.05), Abca7(0.05), Abcc1(0.03), Apoe(-0.01), Apoe(-0.01), Apoa2(-0.06), Abca1(-0.11), Abca1(-0.11), Abca1(-0.11), Abca2(-0.16), Apoa4(-0.33), Apoa4(-0.33), Abca13(-0.64),
inner ear development	0.107479	0.180495	0.0126762	0.069394	37	0.049864	0.714287	0.166946	0.0205921	0.180983	Cebpd(0.85), Bmper(0.54), Adgrv1(0.44), Ifi204(0.34), Mapkapk2(0.29), Anp32b(0.23), Ccm2(0.18), Cdkn1b(0.13), H2-K1(0.12), H2-T23(0.12), Bmp2(0.11), Ptpn11(0.09), Jag1(0.08), Cxcl14(0.07), Lrp10(0.05), Igfbp7(0.03), C1qb(-0.02), Dll1(-0.03), Gli3(-0.03), Bdnf(-0.09), Kcnq1(-0.16), Mpv17(-0.17), Lin7a(-0.17), Cebpa(-0.18), Maf(-0.19), Cytl1(-0.23), Myo6(-0.25), Prox1(-0.27), Fgfr3(-0.3), Myo7a(-0.…
perikaryon	0.140016	0.120508	0.0126944	0.069394	84	0.145269	0.488211	0.155487	0.0982053	0.0540202	Hspb1(0.9), Slc12a5(0.61), Npy(0.61), Glul(0.58), Nefm(0.5), Cacna1a(0.49), Ctsl(0.43), Penk(0.36), Pde10a(0.31), Bglap3(0.22), Map1b(0.22), Map2k1(0.22), Cpe(0.18), Cryab(0.18), Smn1(0.17), Zpr1(0.17), Map2k4(0.17), Arpc2(0.17), Kcnc2(0.16), Kcnc2(0.16), Top1(0.13), Nsmf(0.12), Kcnab1(0.1), Mcrs1(0.08), Brd1(0.08), Slc17a8(0.07), Fus(0.07), Hdac6(0.06), Shtn1(0.06), Pam(0.05), Pcmt1(0.05), Npff(…
photoreceptor outer segment	0.126242	0.169821	0.0127027	0.069394	37	0.337499	0.403508	0.0168147	0.075988	0.218471	Rom1(0.33), Myo3b(0.3), Iqcb1(0.29), Myrip(0.26), Map1b(0.22), Ahi1(0.19), Guca2b(0.16), Gnb1(0.13), Abca4(0.09), Plekhb1(0.08), Ift20(0.07), Rpgr(0.06), Mertk(0.04), Rapgef4(0.03), Bbs4(0.01), Myo5a(0), Ocrl(-0.05), Guca1b(-0.08), Gnat1(-0.12), Gnat1(-0.12), Rgs9(-0.12), Prkca(-0.14), Cep290(-0.16), Map1a(-0.18), Hnf1a(-0.18), Bbs7(-0.2), Gnb5(-0.21), Prom1(-0.22), Nupl2(-0.22), Cib2(-0.23), Ptg…
negative regulation of substrate adhesion-dependent cell spreading	0.146899	0.257639	0.0127223	0.069394	14	0.0842488	0.179717	0.0798984	0.253671	0.262892	Efna5(0.26), Tacstd2(0.09), Coro1c(0.08), Rcc2(0.08), Ap1ar(0), Ap1ar(0), Itgb1bp1(-0.02), Itgb1bp1(-0.02), Actn4(-0.09), Kank1(-0.09), Fbln1(-0.39), Postn(-0.71), Mfi2(-0.77), Dmtn(-0.84),
N-acetylglucosamine metabolic process	0.130477	0.260722	0.0130005	0.0705045	14	0.096405	0.0935605	0.136859	0.506684	0.100504	Chst7(0.26), Gnpda2(0.19), Gnpnat1(0.16), Mgea5(0.15), Chst2(0), Chst2(0), Renbp(-0.13), Renbp(-0.13), Hexb(-0.15), Nagk(-0.16), Extl2(-0.2), Amdhd2(-0.22), Gnpda1(-0.26), Mgat3(-0.62),
frizzled binding	0.110634	0.183506	0.0130307	0.0705045	31	0.0568709	0.367027	0.168962	0.438869	0.0260405	Wnt11(0.8), Wnt7a(0.22), Wnt7a(0.22), Sdcbp(0.2), Magi3(0.19), Wnt9a(0.1), Dvl2(0.07), Dvl2(0.07), Ryk(0.06), Dvl1(0.05), Dvl1(0.05), Wnt7b(0.04), Znrf3(0.04), Dvl3(0), Dvl3(0), Gopc(0), Lrp6(-0.05), Fzd1(-0.07), Wnt10a(-0.08), Bambi(-0.14), Ror2(-0.19), Rnf43(-0.19), Wnt2b(-0.24), Fzd7(-0.25), Wnt5a(-0.27), Wnt5a(-0.27), Wnt9b(-0.35), Rspo3(-0.38), Sfrp1(-0.67), Wnt5b(-0.76), Wnt4(-0.98),
negative regulation of mitotic nuclear division	0.114331	0.310845	0.0130328	0.0705045	10	0.224384	0.198031	0.266528	0.0174101	0.262442	Fgfr2(0.08), Mtbp(0.03), Tom1l1(-0.03), Tom1l2(-0.04), Bmp7(-0.09), Nme6(-0.14), Bmp4(-0.15), Fgfr3(-0.3), Esr1(-0.45), Chek1(-0.47),
triglyceride homeostasis	0.0670577	0.277862	0.0130852	0.0706802	24	0.030015	0.0305278	0.564599	0.0705451	0.536049	Apoa1(0.51), Apoa1(0.51), Angptl4(0.42), Gpihbp1(0.21), Gpihbp1(0.21), Rora(0.15), Rora(0.15), Scarb1(0.06), Angptl3(0.06), Angptl3(0.06), Med13(0.05), Lpl(-0.06), Nr1h3(-0.07), Nr1h3(-0.07), Sesn2(-0.11), Nr1h4(-0.13), Slco1a6(-0.2), Mia2(-0.24), Angptl8(-0.27), Angptl8(-0.27), Angptl8(-0.27), Apoa4(-0.33), Apoc3(-0.39), Hnf4a(-0.39),
positive regulation of vasoconstriction	0.0652203	0.226104	0.0131186	0.0706915	37	0.129603	0.976475	0.0146732	0.0353259	0.032801	Fgb(1.88), Fgg(1.46), Ptgs2(1.16), Fga(1.06), Alox5(0.77), Pdgfb(0.25), Egfr(0.23), Gja1(0.23), Smad6(0.18), Shc1(0.14), Akt1(0.11), Pde5a(0.05), Oxtr(0.04), Cd38(0.02), Gja5(-0.01), Trpm4(-0.02), Ptafr(-0.05), Icam1(-0.08), Avpr1a(-0.08), Avpr1a(-0.08), Cysltr1(-0.11), Cav1(-0.12), Cav1(-0.12), F2r(-0.19), F2r(-0.19), Ptger3(-0.19), Tbxas1(-0.22), Ptgs1(-0.24), Npy1r(-0.26), Adra1b(-0.31), Adra1…
endosome to lysosome transport	0.125502	0.186803	0.0131273	0.0706915	36	0.168312	0.0167654	0.42977	0.139035	0.267186	Rhob(0.39), Pcdhga3(0.24), Fam160a2(0.2), Rab12(0.13), Atg14(0.13), Hgs(0.09), Mtm1(0.09), Tsg101(0.07), Chmp3(0.06), Vps16(0.06), Stx8(0.05), Rab7(0.03), Rab7(0.03), Vps18(0.03), Kif13a(0), Vps39(0), Scyl2(-0.01), Snapin(-0.02), Snx16(-0.03), Snx16(-0.03), Chmp5(-0.03), Hook2(-0.06), Vps11(-0.07), Snx27(-0.07), Aktip(-0.1), Mgrn1(-0.1), Trak1(-0.13), Gprasp1(-0.13), Hook1(-0.14), Dennd3(-0.14), …
transforming growth factor beta binding	0.0874866	0.265117	0.013319	0.071506	22	0.137821	0.840364	0.0129452	0.05134	0.157974	Thbs1(0.36), Tgfbr1(0.27), Tgfbr1(0.27), Tgfb3(0.07), Vasn(0.02), Vasn(0.02), Tgfbr2(0.01), Tgfbr2(0.01), Acvr1(0), Acvr1(0), Cd36(-0.02), Tgfbr3(-0.03), Tgfbr3(-0.03), Eng(-0.09), Eng(-0.09), Hyal2(-0.11), Ltbp4(-0.15), Ltbp3(-0.18), Cd109(-0.21), Acvrl1(-0.23), Agrn(-0.4), Ltbp1(-0.47),
fatty acid binding	0.11316	0.250321	0.0139183	0.0746104	19	0.0513917	0.0692105	0.0621105	0.182327	0.738463	Alb(0.34), Ffar4(0.32), Nme2(0.13), Sh3glb1(0.12), Ppard(0.11), Dgat1(0.1), Arhgdia(0.1), Fabp4(0.03), Acox1(-0.05), Adh5(-0.09), Ptgds(-0.12), Acox3(-0.19), Fabp5(-0.24), Hnf4a(-0.39), Acox2(-0.39), Fabp7(-0.55), Ugt1a10(-0.67), Fabp3(-0.77), Cyp4a14(-0.88),
social behavior	0.132112	0.179652	0.0139523	0.0746795	30	0.15375	0.0409435	0.188881	0.429481	0.136488	Il1b(0.74), Drd1(0.57), Nrxn2(0.27), Shank3(0.19), Shank3(0.19), Nlgn2(0.17), Cln8(0.09), Dvl1(0.05), Oxtr(0.04), Oxtr(0.04), Bbs4(0.01), Mecp2(0), Kalrn(0), Mkks(-0.03), Htt(-0.06), Mtor(-0.07), Avpr1a(-0.08), Pten(-0.1), Vps13a(-0.11), Eif4ebp2(-0.13), Gnb1l(-0.14), Chrnb2(-0.2), Dlg4(-0.29), Pcm1(-0.3), Grid1(-0.39), Shank1(-0.67), Shank1(-0.67), Shank2(-0.87), Shank2(-0.87), Slc6a4(-1.29),
ciliary transition fiber	0.128991	0.271566	0.0141479	0.0756121	13	0.319872	0.0665358	0.0512438	0.137604	0.416896	Odf2(0.21), Cep83(0.15), Nin(0.04), Fbf1(0.04), Cep164(-0.08), Cep164(-0.08), Sclt1(-0.11), Cep89(-0.17), Cep89(-0.17), Tchp(-0.18), Dzip1(-0.7), Cenpf(-1.64), Cenpf(-1.64),
isocitrate dehydrogenase activity	0.125331	0.213304	0.0143786	0.0765818	21	0.13488	0.0553195	0.229969	0.252528	0.216115	Rdh12(1.22), Akr1c21(0.71), Hsd3b7(0.24), Sdr42e1(0.13), Kcnab1(0.1), Ctbp1(0.07), Rdh13(-0.03), Cbr4(-0.06), Bdh2(-0.07), Rdh14(-0.07), H2-Ke6(-0.08), Adh5(-0.09), Sdr39u1(-0.09), Htatip2(-0.12), Aifm1(-0.21), Wwox(-0.21), Idh2(-0.23), Idh1(-0.24), Kcnab2(-0.24), Akr1c13(-0.24), Hsd11b2(-1.29),
amino acid transmembrane transporter activity	0.104319	0.237083	0.0143886	0.0765818	26	0.363137	0.0149865	0.398276	0.0310021	0.40338	Slc6a14(1.36), Slc7a11(0.55), Slc38a2(0.53), Slc7a6(0.26), Slc6a17(0.25), Slc7a1(0.15), Slc7a13(0.13), Slc7a5(0.12), Slc36a4(0.09), Slc7a3(0.03), Slc1a5(-0.02), Slc6a20a(-0.06), Slc6a20a(-0.06), Pex3(-0.07), Slc38a9(-0.08), Slc38a9(-0.08), Slc38a10(-0.1), Slc38a6(-0.25), Slc7a2(-0.26), Slc7a8(-0.27), Slc7a9(-0.28), Slc7a4(-0.34), Slc6a18(-0.39), Slc38a4(-0.5), Slc38a4(-0.5), Slc7a7(-0.61),
membrane depolarization	0.131029	0.244012	0.0143943	0.0765818	16	0.0407429	0.307729	0.182113	0.155783	0.234176	Edn1(0.76), Cacna1a(0.49), Jun(0.46), P2rx7(0.16), Scn5a(0.07), Shtn1(0.06), Park7(0.01), P2rx4(0), Cav1(-0.12), Prkcz(-0.18), Chrnb2(-0.2), Adora2a(-0.2), Scn1b(-0.33), Chrna4(-1.02), Chrna4(-1.02), Adipoq(-3.04),
integral component of mitochondrial inner membrane	0.129321	0.218087	0.014496	0.0770074	21	0.152074	0.34712	0.0213511	0.323422	0.164231	Ccdc109b(0.29), Ccdc109b(0.29), Tmem11(0.19), Mcu(0.1), Mcu(0.1), Cox18(0.05), Smdt1(0.02), Uqcc3(0.02), Ppox(-0.02), Apoo(-0.04), Timm17a(-0.06), Timm17a(-0.06), Timm17b(-0.09), Timm17b(-0.09), Coa3(-0.14), Coa3(-0.14), Etfdh(-0.22), Timm23(-0.28), Timm23(-0.28), Mcur1(-0.3), Mcur1(-0.3),
negative regulation of smoothened signaling pathway	0.137391	0.206228	0.0145648	0.0772567	24	0.111502	0.550082	0.078472	0.180195	0.0727325	Kif7(0.18), Serpine2(0.17), Kctd11(0.13), Ptch1(0.09), Ptch1(0.09), Ptch1(0.09), Tulp3(0.09), Tulp3(0.09), Ulk3(0.07), Wnt7b(0.04), Runx2(0), Gli3(-0.03), Gli3(-0.03), Ift122(-0.08), Rb1(-0.12), Sall1(-0.15), Gas1(-0.24), Sufu(-0.26), Sufu(-0.26), Fgfr3(-0.3), Gpc3(-0.32), Gpc3(-0.32), Glis2(-0.39), Sall3(-0.48),
adiponectin-activated signaling pathway	0.122125	0.364254	0.0147933	0.0783516	10	0.0587432	0.0951631	0.44817	0.0934905	0.294644	Adipor1(0.14), Adipor1(0.14), Adipor1(0.14), Csnk2b(0.01), Adipor2(-0.01), Adipor2(-0.01), Adipor2(-0.01), Acsl1(-0.34), Slc27a1(-0.5), Adipoq(-3.04),
endocytic recycling	0.144647	0.186837	0.0148762	0.0785551	28	0.144747	0.375299	0.0648046	0.328277	0.0639539	Arl4c(0.37), Ehd4(0.22), Rab35(0.18), Micall1(0.12), Stx6(0.1), Eps15(0.08), Rab13(0.08), Rab13(0.08), Snx4(0.06), Ehd2(0.05), Vps51(0.03), Ehd1(-0.02), Snf8(-0.03), Dennd1a(-0.03), Rab14(-0.05), Micall2(-0.07), Micall2(-0.07), Dennd1b(-0.07), Vps53(-0.09), Vps52(-0.09), Lmtk2(-0.11), Epg5(-0.14), Vps50(-0.16), Vps50(-0.16), Fcgr2b(-0.18), Rab17(-0.45), Rab11fip3(-0.47), Ehd3(-0.53),
heterophilic cell-cell adhesion via plasma membrane cell adhesion molecules	0.0770965	0.201082	0.0149802	0.0789866	43	0.230255	0.860412	0.0163699	0.0620302	0.0636805	Amica1(1.02), Pvr(0.5), Nectin2(0.35), Itga5(0.33), Sele(0.3), Amigo3(0.27), Amigo3(0.27), Cxadr(0.26), Selp(0.25), Nectin4(0.22), Cd24a(0.21), Mcam(0.2), Cadm3(0.17), Cadm1(0.15), Cd200(0.12), Cdh4(0.07), Alcam(0), Itga4(-0.07), Amigo1(-0.07), Amigo1(-0.07), Lgals1(-0.09), Cd164(-0.1), Nectin3(-0.1), Nectin1(-0.11), Cdh2(-0.12), Umod(-0.12), Vcam1(-0.15), Vcam1(-0.15), Scarf2(-0.15), Adgrl1(-0.1…
steroid dehydrogenase activity	0.132359	0.206984	0.0150736	0.0793605	22	0.163173	0.127151	0.31434	0.136247	0.125949	Rdh12(1.22), Akr1c21(0.71), Hsd3b7(0.24), Sdr42e1(0.13), Kcnab1(0.1), Ctbp1(0.07), Rdh13(-0.03), Cbr4(-0.06), Bdh2(-0.07), Rdh14(-0.07), Hsd17b11(-0.07), H2-Ke6(-0.08), Adh5(-0.09), Sdr39u1(-0.09), Htatip2(-0.12), Akr1c14(-0.2), Aifm1(-0.21), Wwox(-0.21), Kcnab2(-0.24), Akr1c13(-0.24), Rdh1(-0.38), Hsd11b2(-1.29),
xenobiotic metabolic process	0.115606	0.241773	0.0151085	0.0794262	18	0.0489745	0.0681103	0.485649	0.130669	0.293918	Cyp2b10(1.19), Cyp2e1(0.23), Akr1c12(0.2), Sult1b1(0.17), Rora(0.15), Aip(0.08), Ahr(0.06), Sult1a1(-0.01), Fmo2(-0.01), Cyp1b1(-0.11), Slco1a6(-0.2), Rorc(-0.24), Akr1c13(-0.24), Nceh1(-0.32), Hnf4a(-0.39), Nr1i2(-0.43), Cyp26b1(-0.48), Cyp46a1(-0.52),
ribosome disassembly	0.105075	0.352375	0.0153111	0.0803722	10	0.387407	0.0141008	0.0189362	0.72298	0.192372	Denr(0.18), Mrrf(0.11), Hbs1l(0.09), Eif2d(-0.01), Gfm2(-0.15), Gfm2(-0.15), Mcts1(-0.22), Mtif3(-0.4), Mtif3(-0.4), Mtif3(-0.4),
serine-type carboxypeptidase activity	0.131782	0.310676	0.0153988	0.0805932	10	0.169365	0.0271357	0.154164	0.509952	0.170028	Cpe(0.18), Aebp1(0.13), Dpp7(-0.02), Cpd(-0.06), Ctsa(-0.1), Ctsa(-0.1), Scpep1(-0.12), Prcp(-0.16), Cpn1(-0.2), Cpm(-0.26),
sperm principal piece	0.110648	0.288911	0.0154962	0.0809829	13	0.0671216	0.793303	0.0602873	0.0488112	0.174873	Spa17(0.23), Spa17(0.23), Enkur(0.22), Kif2a(0.13), Cabyr(0.09), Ift81(0.02), Hk1(-0.13), Ift27(-0.16), Spag6l(-0.24), Ift172(-0.51), Atp2b4(-0.56), Pfkm(-0.58), Catsper4(-0.68),
rRNA catabolic process	0.116658	0.387232	0.0157389	0.08213	10	0.489643	0.038432	0.0994342	0.191259	0.195848	Dicer1(0.05), Exosc4(0.04), Dis3(-0.02), Dis3(-0.02), Dis3l(-0.02), Dis3l(-0.02), Dis3l2(-0.03), Xrn1(-0.04), Drosha(-0.06), Exosc5(-0.12),
Wnt signaling pathway	0.12516	0.0868262	0.0159395	0.0830542	184	0.0141744	0.24903	0.424891	0.4272	0.0599062	Frat2(1), Wnt11(0.8), Tmem198(0.6), Lrrfip2(0.43), Sfrp2(0.38), Nkd2(0.35), Cd44(0.33), Csnk1e(0.33), Tgfb1i1(0.28), Fzd2(0.27), Tle1(0.25), Csnk2a2(0.23), Dab2(0.23), Wnt7a(0.22), Hbp1(0.22), Fzd3(0.21), Tcf7(0.21), Fermt2(0.21), Csnk1d(0.2), Tle4(0.19), Bcl7b(0.18), Cpe(0.18), Fzd5(0.18), Fzd6(0.18), Myc(0.18), Grk6(0.18), Senp2(0.18), Pitx2(0.17), Ppm1a(0.17), Calcoco1(0.16), Rnf138(0.14), Zra…
motile cilium	0.0929742	0.153679	0.0160225	0.0833639	47	0.043717	0.36495	0.0270679	0.203511	0.506164	Dnajb13(0.8), Klc3(0.46), Hif1a(0.24), Spa17(0.23), Enkur(0.22), Anxa1(0.2), Rsph1(0.2), Arl13b(0.2), Alms1(0.12), Gas8(0.11), Gas8(0.11), Cabyr(0.09), Cabyr(0.09), Spef1(0.08), Ift20(0.07), Daam1(0.06), Wdr19(0.04), Stard10(0.03), Tpgs1(0.03), Rsph9(0.02), Bbs4(0.01), Bbs4(0.01), Mkks(-0.03), Tsga10(-0.03), Bbs2(-0.06), Bbs2(-0.06), Prkaca(-0.07), Sord(-0.11), Intu(-0.13), Ift46(-0.14), Fopnl(-0…
triglyceride metabolic process	0.0791614	0.214297	0.0161087	0.0836897	31	0.0248262	0.0275066	0.259267	0.0913911	0.857819	Apoh(0.77), Apobr(0.41), Acsl6(0.41), Acsl4(0.33), Cyp2e1(0.23), Pcsk9(0.22), Ptpn11(0.09), Gpat4(0.09), Insig1(0.09), Angptl3(0.06), Cpt1a(0.03), Insig2(0), Apoe(-0.01), Dbi(-0.01), Cd36(-0.02), Slc22a4(-0.02), Sel1l(-0.06), Gpx1(-0.11), Cav1(-0.12), Lmf1(-0.12), Mttp(-0.13), Cat(-0.19), Cav3(-0.32), Gpam(-0.33), Acsl1(-0.34), Apoc3(-0.39), Gk(-0.39), Tnxb(-0.5), Slc37a4(-0.61), G6pc(-0.67), Scd…
positive regulation of axonogenesis	0.150346	0.183035	0.0162246	0.0839218	27	0.118658	0.105435	0.180455	0.138285	0.363926	Map2k1(0.22), Skil(0.08), Stk11(0.08), Stk25(0.07), Stk25(0.07), Rpl4(0.07), Nin(0.04), Map2k2(0.04), Braf(0.03), Braf(0.03), Plxnb1(0.03), Golga2(0.02), Zeb2(0.01), Sema4d(-0.03), Sema4d(-0.03), Amigo1(-0.07), Amigo1(-0.07), Dixdc1(-0.09), Plxnb2(-0.11), Robo2(-0.13), Tiam1(-0.21), Tiam1(-0.21), Rufy3(-0.22), Ntrk2(-0.27), Ache(-0.29), Robo1(-0.42), Metrn(-0.77),
cholesterol binding	0.134292	0.160415	0.0163334	0.0842532	40	0.127135	0.418409	0.256524	0.0594764	0.111745	Apoa1(0.51), Apoa1(0.51), Npc1(0.3), Star(0.28), Star(0.28), Soat2(0.26), Osbpl5(0.12), Npc2(0.1), Npc2(0.1), Npc2(0.1), Ptch1(0.09), Ptch1(0.09), Soat1(0.08), Osbpl7(0.08), Osbpl2(0.03), Stard3(0.02), Apoe(-0.01), Osbpl10(-0.03), Apoa2(-0.06), Apoa2(-0.06), Scap(-0.06), Erlin2(-0.08), Apod(-0.1), Stard5(-0.11), Stard5(-0.11), Stard5(-0.11), Anxa6(-0.12), Osbpl8(-0.19), Scp2(-0.2), Osbp2(-0.21), …
negative regulation of neuron death	0.095402	0.164149	0.0163363	0.0842532	43	0.361946	0.182173	0.046366	0.407311	0.054752	Il6(1.08), Csf3(0.53), Fgf21(0.43), Rel(0.23), Sirt1(0.2), Btbd10(0.18), Chmp4b(0.18), Hsf1(0.14), Serpinf1(0.13), Stat3(0.11), Creb1(0.09), Psmc1(0.09), Tigar(0.08), Hdac7(0.07), Vegfa(0.06), Snca(0.05), Tmem259(0.05), Abcc1(0.03), Ccl5(0.03), Park7(0.01), Neo1(0), Apoe(-0.01), Ppp5c(-0.01), Ctnnb1(-0.03), Htt(-0.06), Dtnbp1(-0.08), Bdnf(-0.09), Nos1ap(-0.1), Cdk5(-0.17), Pm20d1(-0.24), Sorl1(-0…
phosphofructokinase activity	0.151324	0.273202	0.016704	0.0860244	12	0.202949	0.229522	0.182379	0.224152	0.064217	Hk3(0.33), Hk2(0.22), Uckl1(0.18), Pomk(0.09), Nol9(-0.01), Fam20b(-0.01), Hk1(-0.13), Fggy(-0.13), Fn3krp(-0.35), Pfkm(-0.58), Pfkm(-0.58), Fn3k(-0.82),
cognition	0.148678	0.185831	0.0169405	0.0870121	27	0.0672292	0.186003	0.249384	0.306933	0.120334	Chd7(0.26), Rp9(0.2), St3gal4(0.17), Chmp2b(0.17), Dgcr2(0.11), Dopey2(0.11), Cyfip1(0.08), Nipbl(0.05), Slc1a4(0.04), Gnas(0.03), Chl1(-0.05), Lins1(-0.06), Kmt2a(-0.07), Adora1(-0.08), Magt1(-0.08), Nf1(-0.09), Tusc3(-0.1), Shroom4(-0.17), Chrnb2(-0.2), Sobp(-0.2), Ctns(-0.23), Cbr3(-0.42), Hoxa1(-0.44), Stra6(-0.51), Gpr155(-0.74), Cux2(-0.78), Chrna4(-1.02),
epithelial cell differentiation	0.0692955	0.231847	0.0169967	0.0870121	36	0.00763506	0.944587	0.0460227	0.0176184	0.452618	Krt4(0.6), Nr5a2(0.57), Id3(0.53), Tgfb1i1(0.28), Fzd2(0.27), Fzd2(0.27), Elf3(0.23), Gata6(0.23), Tagln2(0.11), Stx2(0.09), Fgfr2(0.08), Wt1(0.08), Cd63(0.06), Vegfa(0.06), F11r(0.04), Upk2(0), Upk2(0), Fzd1(-0.07), Fzd1(-0.07), Bdh2(-0.07), Bmp7(-0.09), Krt10(-0.09), Tagln(-0.09), Cdhr2(-0.12), Ehf(-0.16), Tcf21(-0.16), Cbfa2t2(-0.22), Ces1d(-0.3), Pparg(-0.32), Krt14(-0.45), Krt14(-0.45), Tst(…
glucose homeostasis	0.126194	0.102118	0.0171498	0.0870121	101	0.0274719	0.17056	0.368167	0.0596269	0.513237	Vgf(1.21), Il6(1.08), Sox4(0.67), Pdk4(0.64), Ero1lb(0.64), Nmb(0.51), Gprc5b(0.44), Ptpn2(0.3), Pde3b(0.28), Rps6(0.28), Sh2b2(0.28), Cry2(0.24), Hif1a(0.24), Crtc2(0.21), Crtc2(0.21), Xbp1(0.19), Gpr39(0.16), Cry1(0.14), Plscr3(0.14), Adipor1(0.14), Rph3al(0.14), Slc8b1(0.13), Adgrf5(0.12), Alms1(0.12), Akt1(0.11), Stat3(0.11), Spop(0.1), Mcu(0.1), Ptch1(0.09), Ptpn11(0.09), Stk11(0.08), Sidt2(…
epithelial cell morphogenesis	0.136427	0.21068	0.0171862	0.0870121	21	0.0382041	0.261742	0.28971	0.284845	0.115428	Cldn3(0.3), Rac1(0.3), Jmjd1c(0.27), Cdh1(0.26), Flnb(0.17), Rilpl2(-0.02), Palld(-0.03), Rilpl1(-0.03), Rab25(-0.04), Grhl2(-0.05), Grhl2(-0.05), Ift88(-0.1), Sipa1l3(-0.11), Sipa1l3(-0.11), Dact2(-0.16), Map3k1(-0.18), Ihh(-0.19), Cgn(-0.24), Epb41l5(-0.26), Ar(-0.55), Bcl11b(-0.68),
palate development	0.0876329	0.139227	0.0172309	0.0870121	70	0.0163442	0.79475	0.394619	0.168052	0.014394	Wnt11(0.8), Wnt11(0.8), Csrnp1(0.65), Inhba(0.54), Col11a2(0.45), Tiparp(0.33), Tgfbr1(0.27), Tgfbr1(0.27), Chd7(0.26), Chd7(0.26), Schip1(0.24), Anp32b(0.23), Wnt7a(0.22), Arid5b(0.19), Tfap2a(0.18), Pak1ip1(0.16), Smad4(0.13), Pygo2(0.13), Bmpr1a(0.11), Pkdcc(0.11), Insig1(0.09), Sgpl1(0.08), Smad2(0.07), Tgfb3(0.07), Bnc2(0.06), Sos1(0.04), Ephb3(0.01), Men1(0.01), Tgfbr2(0.01), Insig2(0), Ski…
protein localization to synapse	0.122936	0.30472	0.0174041	0.0870121	12	0.0531961	0.437339	0.0730301	0.391798	0.111453	Klc1(0.3), Nlgn2(0.17), Homer1(0.12), Nphs1(0.06), Bsn(-0.08), Cdk5(-0.17), Dlg4(-0.29), Dlg4(-0.29), Asic2(-0.3), Reln(-0.36), Pclo(-0.39), Shank1(-0.67),
nonmotile primary cilium assembly	0.0857225	0.207218	0.0175423	0.0870121	32	0.492287	0.0805882	0.00353234	0.520485	0.258048	Arl13b(0.2), Csnk1d(0.2), Csnk1d(0.2), Gorab(0.15), Kif3a(0.14), Tmem17(0.14), Pibf1(0.07), Cenpj(0.05), Vangl2(0.04), Tmem107(0.02), Tmem107(0.02), Bbs4(0.01), Mks1(0.01), Mkks(-0.03), Mkks(-0.03), Cep131(-0.07), Fuz(-0.09), Fuz(-0.09), Ift88(-0.1), C2cd3(-0.12), Cep126(-0.13), Cep290(-0.16), Cep89(-0.17), Cep250(-0.18), Bbs7(-0.2), Ift80(-0.21), Bbs10(-0.21), Bbs1(-0.26), Bbs1(-0.26), Bbs1(-0.2…
limb morphogenesis	0.116037	0.223666	0.0176005	0.0870121	22	0.0453291	0.160344	0.182086	0.679866	0.0565799	Mfsd7b(0.17), Pkdcc(0.11), Ptch1(0.09), Bak1(0.07), Bax(0.01), Pcsk5(0), Sik3(-0.02), Gli3(-0.03), Gli3(-0.03), Lrp6(-0.05), Lrp6(-0.05), Lmx1b(-0.07), Tbx3(-0.08), Megf8(-0.11), Lrp5(-0.14), Idua(-0.17), Rpgrip1l(-0.19), Pcnt(-0.2), Wnt5a(-0.27), Asph(-0.29), Bmpr1b(-0.3), Ift140(-0.3),
melanosome	0.12731	0.195848	0.0176216	0.0870121	27	0.0651667	0.141931	0.178043	0.164286	0.411439	Itgb3(0.82), Myrip(0.26), Stx3(0.21), Sytl2(0.06), Ankrd27(0.05), Rab1a(0.02), Rab32(0.02), Rab32(0.02), Myo5a(0), Rab29(0), Lamp1(-0.02), Rab27b(-0.04), Rab27b(-0.04), Mlph(-0.07), Mlph(-0.07), Hps4(-0.11), Hps4(-0.11), Tmem33(-0.12), Gchfr(-0.12), Sytl1(-0.16), Rab38(-0.28), Rab38(-0.28), Rab27a(-0.32), Rab27a(-0.32), Myo7a(-0.32), Rab17(-0.45), Mreg(-0.59),
Wnt signaling pathway, planar cell polarity pathway	0.135705	0.25865	0.0176861	0.0870121	22	0.0897576	0.0359113	0.183963	0.619914	0.166711	Rac1(0.3), Fzd6(0.18), Dvl2(0.07), Dvl2(0.07), Dvl1(0.05), Dvl1(0.05), Dvl1(0.05), Dvl1(0.05), Med12(0.04), Vangl2(0.04), Vangl2(0.04), Znrf3(0.04), Dvl3(0), Dvl3(0), Dvl3(0), Ror2(-0.19), Wnt5a(-0.27), Wnt5a(-0.27), Wnt5a(-0.27), Wnt5a(-0.27), Wnt9b(-0.35), Sfrp1(-0.67),
luteinization	0.137738	0.310878	0.0177503	0.0870121	10	0.086872	0.274936	0.328803	0.273866	0.044664	Ptprn(0.37), Schip1(0.24), Sgpl1(0.08), Stat5b(-0.05), Stat5b(-0.05), Fzd4(-0.13), Plekha1(-0.18), Stat5a(-0.23), Pdgfra(-0.34), Pdgfra(-0.34),
cellular response to amino acid stimulus	0.15099	0.125198	0.0181341	0.0870121	57	0.306271	0.368865	0.182131	0.0943984	0.0526817	Mmp3(0.93), Cebpb(0.52), Cpeb1(0.34), Bcl2l1(0.28), Cdh1(0.26), Egfr(0.23), Xbp1(0.19), Sesn1(0.18), Sesn1(0.18), Col5a2(0.17), Rraga(0.17), Rraga(0.17), Zeb1(0.16), Hsf1(0.14), Socs1(0.13), Nsmf(0.12), Lamtor1(0.08), Capn2(0.07), Capn2(0.07), Col4a1(0.07), Lamtor4(0.05), Ipo5(0.05), Lamtor3(0.03), Dnmt1(-0.01), Rragc(-0.01), Sh3bp4(-0.01), Dnmt3b(-0.02), Rptor(-0.04), Lamtor2(-0.04), Slc38a9(-0.…
protein dimerization activity	0.127449	0.0842102	0.0188044	0.0890629	131	0.0926805	0.558055	0.146366	0.0310897	0.289979	Syn1(1), Id3(0.53), Mxd1(0.52), Zbed4(0.46), Npas2(0.34), Ceacam2(0.33), Ggn(0.29), Hif1a(0.24), Arntl(0.23), E2f3(0.22), Polr1d(0.21), Taf5(0.21), Id4(0.2), E2f5(0.19), Myc(0.18), Srebf1(0.18), Tfap2a(0.18), Tfe3(0.18), E2f2(0.18), Mcl1(0.17), Mlxip(0.17), Tcf23(0.16), Id1(0.15), Tcf4(0.15), Pdcd6(0.14), Pdcd6(0.14), Ppp3ca(0.14), Srf(0.14), Max(0.13), Mef2d(0.12), Ppp2ca(0.12), Polr1c(0.11), St…
chloride ion binding	0.0857601	0.313228	0.0189042	0.0894161	12	0.055247	0.0679361	0.514836	0.0294441	0.616004	Ctsc(0.34), Ace(0.14), Clcn4(-0.02), Clcn2(-0.04), Clcn7(-0.06), Clcnkb(-0.08), Clcn3(-0.11), Slc22a6(-0.24), Clcn6(-0.28), Clcnka(-0.31), Clcn5(-0.33), Amy1(-0.62),
nucleoside triphosphate biosynthetic process	0.121633	0.313658	0.0189372	0.0894524	11	0.620111	0.426038	0.0731383	0.012987	0.139528	Nme2(0.13), Nme2(0.13), Cmpk1(0.09), Nme1(0), Ak7(0), Suclg1(-0.22), Ak5(-0.24), Nme4(-0.4), Ak1(-0.57), Ak4(-0.57), Cmpk2(-0.81),
positive regulation of collagen biosynthetic process	0.154704	0.230522	0.0190695	0.0899573	23	0.187053	0.456075	0.111881	0.144576	0.0868412	Ctgf(0.55), Rgcc(0.38), Suco(0.32), Tgfb1(0.26), Tgfb1(0.26), Il18(0.25), Pdgfb(0.25), Itga2(0.07), Tgfb3(0.07), Ep300(0.06), Eng(-0.09), Serpinf2(-0.09), Serpinf2(-0.09), Cbx8(-0.11), Bmp4(-0.15), Ccl2(-0.17), F2r(-0.19), Ihh(-0.19), Pdgfrb(-0.34), Scx(-0.4), Scx(-0.4), Ltbp1(-0.47), Wnt4(-0.98),
hydrolase activity, acting on carbon-nitrogen (but not peptide) bonds	0.142289	0.244687	0.0190982	0.0899725	15	0.372643	0.109	0.0624668	0.155483	0.297891	Crmp1(0.47), Gda(0.34), Ydjc(0.05), Dpysl2(-0.07), Nit1(-0.09), Dpysl3(-0.1), Nit2(-0.11), Cad(-0.11), Upb1(-0.15), Btd(-0.21), Amdhd2(-0.22), Nadsyn1(-0.27), Naaa(-0.32), Vnn1(-0.46), Dpys(-0.59),
G2/M transition of mitotic cell cycle	0.135841	0.184505	0.0195342	0.0916605	29	0.0480717	0.359087	0.223515	0.0571218	0.401477	Cdkn1a(0.54), Brsk1(0.3), Cdkn2b(0.27), Fbxl15(0.2), Calm2(0.16), Calm1(0.15), Ccny(0.04), Lats1(0.03), Kdm8(0.03), Ppm1d(-0.02), Cdk14(-0.03), Csrp2bp(-0.03), Arpp19(-0.07), Skp2(-0.08), Skp2(-0.08), Calm3(-0.09), Taf2(-0.1), Abcb1a(-0.14), Tpd52l1(-0.16), Chek2(-0.24), Foxm1(-0.31), Plk1(-0.34), Mastl(-0.36), Ush1c(-0.36), Fbxl7(-0.37), Chek1(-0.47), Plcb1(-0.52), Plcb1(-0.52), Cit(-0.69),
head development	0.122159	0.279629	0.0198591	0.0930617	14	0.0150906	0.439865	0.218627	0.40761	0.102168	Axin1(0.13), Ldb1(0.13), Ednra(0.02), Mks1(0.01), Osr2(-0.11), Flrt3(-0.13), Pgap1(-0.13), Pgap1(-0.13), Lhx1(-0.14), Rpgrip1l(-0.19), Pcnt(-0.2), Ssbp3(-0.25), Gli2(-0.47), Stra6(-0.51),
positive regulation of insulin secretion involved in cellular response to glucose stimulus	0.131165	0.183432	0.0200382	0.0937767	29	0.0599376	0.444361	0.108538	0.0593921	0.459734	Gpr27(0.29), Hif1a(0.24), Sirt1(0.2), Gpr39(0.16), Stx4a(0.07), Atg7(0.06), Pla2g6(0.05), Sri(0.03), Kif5b(0.01), Phpt1(0.01), Ppp3cb(0), Ppp3cb(0), Trpm4(-0.02), Bad(-0.04), Tmem27(-0.08), C2cd2l(-0.11), Nr1h4(-0.13), Fam132a(-0.14), Gpld1(-0.15), Mpc2(-0.16), Gpr68(-0.16), Oxct1(-0.17), Lepr(-0.24), Arrb1(-0.32), Cftr(-0.35), Cftr(-0.35), Park2(-0.42), Ano1(-0.5), Ano1(-0.5),
meiotic nuclear division	0.0942485	0.255925	0.0200944	0.0939156	19	0.164072	0.155632	0.102673	0.22215	0.285657	Sycp3(0.23), Tubgcp4(0.12), Pms2(0.05), Smc1a(0.02), Smc1a(0.02), Tubgcp3(0), Smc3(-0.02), Smc3(-0.02), Xrn1(-0.04), Tubgcp5(-0.06), Tubgcp6(-0.09), Tubgcp2(-0.11), Rpa1(-0.22), Mlh1(-0.29), Mlh1(-0.29), Aurka(-0.39), Rec8(-0.39), Rad51(-0.51), Mki67(-0.54),
double-strand break repair	0.0803215	0.163774	0.0201346	0.0939791	67	0.618061	0.0271964	0.100709	0.350215	0.0967041	Ercc1(0.62), Ggn(0.29), Lig4(0.22), Lig4(0.22), Lig4(0.22), Mad2l2(0.18), Eya3(0.17), Kat5(0.17), Vcp(0.17), Smarca5(0.15), Xrcc4(0.14), Xrcc4(0.14), Mta1(0.1), Mta1(0.1), Setx(0.1), Bre(0.09), Trp53(0.08), Actr5(0.08), Marf1(0.07), Rad21(0.06), Ino80(0.04), Dclre1c(0.04), Apbb1(0.03), Apbb1(0.03), Uimc1(0.03), Uimc1(0.03), Aplf(0.03), Aplf(0.03), Exd2(0.02), Tdp2(0.01), Rnf168(0.01), Mre11a(0), …
glycosaminoglycan binding	0.100647	0.292895	0.0203766	0.0949833	14	0.0253375	0.693651	0.515257	0.0126904	0.176245	Crispld2(0.19), Serpine2(0.17), Smoc2(0.13), Dcn(0.07), Spock2(0.04), Tgfbr2(0.01), Tgfbr3(-0.03), Gns(-0.03), Eng(-0.09), Bgn(-0.33), Abi3bp(-0.44), Egflam(-0.61), Ccdc80(-0.65), Ptn(-1.43),
regulation of cardiac muscle cell contraction	0.0931889	0.30596	0.0204437	0.095171	15	0.00919444	0.52177	0.0909191	0.0645793	0.720263	Pde4b(0.64), Pde4d(0.28), Kcnj2(0.27), Stc1(0.19), Scn5a(0.07), Scn5a(0.07), Sri(0.03), Sumo1(-0.11), Fxyd1(-0.17), Akap6(-0.17), Atp1a1(-0.29), Pln(-0.34), Adrb1(-0.57), Ank2(-0.57), Atp1a2(-1.4),
response to cold	0.118411	0.2456	0.0205289	0.0954419	18	0.053682	0.0239512	0.155176	0.460349	0.553402	Vgf(1.21), Dio2(0.93), Adrb2(0.54), Rbm3(0.2), Zfp516(0.19), Metrnl(0.16), Plac8(0.06), Acadl(0), Lrp11(-0.01), Acadvl(-0.18), Thra(-0.21), Tmem135(-0.28), Tmem135(-0.28), Acadm(-0.29), Agt(-0.42), Slc27a1(-0.5), Adrb1(-0.57), Acot11(-0.83),
mitochondrial electron transport, ubiquinol to cytochrome c	0.128941	0.345122	0.0205672	0.0954942	10	0.0486189	0.277323	0.160618	0.0354144	0.684835	CYTB(0.13), Uqcc3(0.02), Mecp2(0), Pmpcb(-0.01), Cycs(-0.05), Uqcr10(-0.05), Uqcrb(-0.07), Uqcrh(-0.08), Uqcrc2(-0.11), Uqcrc1(-0.14),
negative regulation of axon extension involved in axon guidance	0.1268	0.21156	0.0214396	0.0991546	25	0.494821	0.302095	0.111023	0.231168	0.0206602	Sema3a(0.71), Sema3a(0.71), Sema4c(0.42), Sema3f(0.3), Sema3f(0.3), Sema6b(0.22), Sema6d(0.09), Sema3e(0.08), Ryk(0.06), Sema3c(0.02), Sema4d(-0.03), Sema4g(-0.04), Sema4b(-0.05), Sema6a(-0.06), Sema3g(-0.18), Nrp1(-0.23), Nrp1(-0.23), Sema3d(-0.26), Plxna3(-0.27), Wnt5a(-0.27), Sema4a(-0.34), Sema3b(-0.42), Sema5a(-0.44), Sema5a(-0.44), Sema5b(-1.44),
beta-N-acetylhexosaminidase activity	0.110796	0.343068	0.0216029	0.0997793	10	0.103685	0.0639794	0.228204	0.0853724	0.646887	Chil3(1.73), Mgea5(0.15), Hexdc(-0.06), Hexa(-0.08), Hexa(-0.08), Hexa(-0.08), Hexb(-0.15), Hexb(-0.15), Hexb(-0.15), Gm2a(-0.23),
behavioral response to cocaine	0.131851	0.275009	0.0218886	0.100769	13	0.179719	0.483044	0.0308735	0.0839006	0.381311	Drd1(0.57), Drd1(0.57), Homer1(0.12), Snca(0.05), Kalrn(0), Ehmt2(-0.08), Sdk1(-0.1), Cdk5(-0.17), Adra1b(-0.31), Abat(-0.33), Parp1(-0.34), Nos1(-0.56), Homer2(-0.56),
WASH complex	0.148053	0.350363	0.021898	0.100769	10	0.198001	0.0328921	0.18674	0.554795	0.142955	Capzb(0.14), Capza1(0.11), Ccdc53(0.06), Fam21(-0.03), Snx27(-0.07), Wash1(-0.1), E430025E21Rik(-0.1), A230046K03Rik(-0.13), A230046K03Rik(-0.13), Dnajc13(-0.2),
cochlea development	0.111418	0.230805	0.0219027	0.100769	19	0.217171	0.499144	0.0564663	0.111012	0.179425	Cecr2(0.32), Cdh1(0.26), Pafah1b1(0.07), Ift20(0.07), Vangl2(0.04), Hes1(0.01), Hes1(0.01), Hey2(0), Hey2(0), Pax2(-0.1), Ift88(-0.1), Ift27(-0.16), Rpgrip1l(-0.19), Sobp(-0.2), Dchs1(-0.25), Fgfr3(-0.3), Gabrb3(-0.32), Hoxa1(-0.44), Atp2b2(-0.62),
triglyceride catabolic process	0.0763532	0.36295	0.0220437	0.101204	13	0.0229057	0.0264395	0.0526912	0.362922	0.919425	Apoa1(0.51), Pnpla2(0.34), Apob(0.11), Apob(0.11), Ddhd2(0.06), Apoe(-0.01), Lpl(-0.06), Lpl(-0.06), Lipe(-0.26), Lipe(-0.26), Lipe(-0.26), Apoa4(-0.33), Apoc3(-0.39),
chemorepellent activity	0.122214	0.23165	0.0221097	0.101204	25	0.116054	0.719906	0.0592093	0.20053	0.0687163	Sema3a(0.71), Apoa1(0.51), Sema4c(0.42), Sema3f(0.3), Sema3f(0.3), Efna5(0.26), Sema6b(0.22), Sema6d(0.09), Sema3e(0.08), Sema3c(0.02), Sema4d(-0.03), Sema4g(-0.04), Sema4b(-0.05), Nrg1(-0.05), Sema6a(-0.06), Flrt2(-0.1), Flrt3(-0.13), Sema3g(-0.18), Sema3d(-0.26), Sema4a(-0.34), Sema3b(-0.42), Sema5a(-0.44), Slit2(-0.44), Epha7(-0.59), Sema5b(-1.44),
metalloaminopeptidase activity	0.117783	0.303958	0.0221115	0.101204	13	0.0148717	0.099557	0.0534493	0.779297	0.421185	Npepps(0.06), 2010111I01Rik(0.06), Rnpepl1(0.06), Dnpep(-0.01), Lnpep(-0.01), Lta4h(-0.02), Enpep(-0.03), Enpep(-0.03), Erap1(-0.07), Rnpep(-0.12), Rnpep(-0.12), Xpnpep1(-0.25), Anpep(-0.51),
myosin complex	0.118211	0.192838	0.0227561	0.103751	33	0.162608	0.0467052	0.0550017	0.88248	0.0807987	Bmf(0.44), Bmf(0.44), Myo3b(0.3), Myo9b(0.26), Myo1d(0.14), Myh14(0.13), Myl6(0.12), Myh9(0.1), Myo1g(0.1), Myo1b(0.07), Myl6b(0.07), Myo1e(0.03), Ccdc102a(0.02), Myo5a(0), Myo1c(-0.04), Myo10(-0.07), Myo5b(-0.1), Myo9a(-0.1), Myh10(-0.12), Myl12b(-0.14), Cgnl1(-0.14), Myo7b(-0.16), Dynll2(-0.18), Myo19(-0.21), Myo18a(-0.23), Cgn(-0.24), Myo6(-0.25), Myl9(-0.3), Myo7a(-0.32), Myo1f(-0.34), Myh11(…
presynaptic active zone	0.109667	0.245538	0.0228588	0.104085	24	0.032129	0.159787	0.44422	0.0418576	0.597886	Syn1(1), Syn1(1), Unc13a(0.41), Rims3(0.3), Fzd3(0.21), Rims2(0.21), Erc1(0.15), Nufip1(0.08), Nufip1(0.08), Ncoa2(-0.03), Adora1(-0.08), Bsn(-0.08), Bsn(-0.08), Cdh2(-0.12), Adora2a(-0.2), Ntrk2(-0.27), Erc2(-0.28), Syp(-0.33), Syp(-0.33), Grm7(-0.35), Pclo(-0.39), Sv2a(-0.53), Gper1(-0.56), Shank2(-0.87),
insulin-like growth factor binding	0.148096	0.214566	0.0230116	0.104565	22	0.0878584	0.12509	0.07373	0.433139	0.366764	Esm1(0.94), Igfbp1(0.73), Igfbp3(0.67), Htra4(0.63), Ctgf(0.55), Cyr61(0.4), Igfbp7(0.03), Crim1(0.02), Htra1(-0.02), Igf2r(-0.04), Igf1r(-0.05), Igf1r(-0.05), Igfbp6(-0.05), Igfbp4(-0.15), Nov(-0.15), Wisp1(-0.27), Igfbp5(-0.31), Igfbp5(-0.31), Igfals(-0.67), Igfals(-0.67), Igfbp2(-0.78), Htra3(-0.83),
lung vasculature development	0.131362	0.339054	0.0230232	0.104565	11	0.19164	0.715689	0.207422	0.0375389	0.0589427	Lif(0.73), Errfi1(0.27), Id1(0.15), Vegfa(0.06), Vegfa(0.06), Foxf1(0.03), Ift88(-0.1), Tcf21(-0.16), Stra6(-0.51), Igf1(-0.87), Igf1(-0.87),
cytoplasmic microtubule organization	0.159275	0.169724	0.023105	0.104802	34	0.191775	0.0856432	0.211037	0.261632	0.218601	Plk3(0.37), Chp1(0.2), Spast(0.16), Dst(0.14), Axin1(0.13), Tubgcp4(0.12), Cript(0.1), Dvl1(0.05), Dvl1(0.05), Atad1(0.05), Tubg1(0.05), Slk(0.03), Katna1(0.02), Apc(0.01), Tubgcp3(0), Cib1(-0.06), Tubgcp5(-0.06), Slain2(-0.07), Slain2(-0.07), Fignl2(-0.07), Tubgcp6(-0.09), Ift88(-0.1), Tubgcp2(-0.11), Cep126(-0.13), Katnal1(-0.14), Hook3(-0.17), Fign(-0.18), Map10(-0.23), Map10(-0.23), Pcm1(-0.3…
photoreceptor connecting cilium	0.120408	0.166722	0.0232555	0.105266	37	0.192883	0.487342	0.0035722	0.341109	0.325322	Adgrv1(0.44), Iqcb1(0.29), Iqcb1(0.29), Kif3a(0.14), Sept2(0.13), Spata7(0.08), Topors(0.08), Topors(0.08), Ift20(0.07), Tbcc(0.07), Rpgr(0.06), Ift57(0.05), Wdr19(0.04), Cetn3(0.01), Bbs4(0.01), Whrn(-0.03), Whrn(-0.03), Rpgrip1(-0.03), Kifap3(-0.05), Nphp4(-0.05), Pcdhb22(-0.06), Ift122(-0.08), Ift88(-0.1), Arl3(-0.1), Gnat1(-0.12), Ift52(-0.14), 1810043G02Rik(-0.16), Cep290(-0.16), Cetn2(-0.2)…
drug transmembrane transporter activity	0.104379	0.304475	0.0233638	0.105357	12	0.535533	0.0042137	0.235931	0.0665117	0.625514	Abcb1b(0.39), Abcc1(0.03), Slc22a18(0.02), Slc18a2(-0.02), Abcg2(-0.11), Abcg2(-0.11), Slc17a3(-0.11), Slc18a1(-0.17), Abcc3(-0.29), Slc47a1(-0.35), Slc47a1(-0.35), Abcc4(-0.37),
semaphorin receptor activity	0.066567	0.327365	0.0233682	0.105357	17	0.714137	0.469337	0.0738048	0.493106	0.000260143	Plxna2(0.44), Plxna2(0.44), Plxna2(0.44), Plxnb1(0.03), Plxnb1(0.03), Plxna1(0.02), Plxnd1(-0.03), Plxnd1(-0.03), Nrp2(-0.08), Plxnb2(-0.11), Nrp1(-0.23), Nrp1(-0.23), Nrp1(-0.23), Nrp1(-0.23), Plxna3(-0.27), Plxnc1(-0.32), Plxna4(-0.36),
N-glycan processing	0.162172	0.225805	0.0233764	0.105357	17	0.267141	0.0603273	0.133343	0.464006	0.141881	St8sia4(0.14), Edem1(0.14), Man1b1(0.1), Mgat4b(0.07), Prkcsh(0.06), Man1a(0.01), Man1a2(0.01), Man2a1(-0.01), Man2a2(-0.04), Edem2(-0.07), Edem3(-0.1), Usf3(-0.11), Ganab(-0.16), Man1c1(-0.22), Mgat4a(-0.26), Fut8(-0.31), Engase(-0.51),
hydrogen-exporting ATPase activity, phosphorylative mechanism	0.132032	0.273899	0.0236491	0.106323	13	0.0509077	0.385812	0.17518	0.0387096	0.575585	Atp5l(0.14), Atp6v0c(0.09), Atp5e(0.05), Atp6v0b(0.05), Atp6v1g3(0.05), Atp6v0d1(0.01), Atp6v1g1(-0.05), Atp6v1c1(-0.06), Atp6v1e1(-0.09), Atp6v1g2(-0.28), Atp6v0d2(-0.28), Atp6v0a4(-0.32), Atp6v1c2(-0.51),
antigen processing and presentation	0.0800673	0.222239	0.0237038	0.106323	34	0.0998778	0.955518	0.107101	0.0787036	0.0140453	Relb(0.48), Hfe(0.39), Azgp1(0.32), Ctss(0.27), Rab10(0.27), Rab6a(0.22), Rab8b(0.2), Rab35(0.18), H2-D1(0.17), H2-K1(0.12), Rab3b(0.12), Flt3(0.04), Rab32(0.02), Unc93b1(0), Rab5b(-0.01), Cd1d1(-0.02), Ap3d1(-0.03), H2-Aa(-0.03), Cd74(-0.05), Cd74(-0.05), H2-Eb1(-0.06), Mr1(-0.06), Rab34(-0.07), Fcgrt(-0.08), Ap3b1(-0.13), Rab4a(-0.13), Psmb8(-0.15), H2-Ab1(-0.21), Rab27a(-0.32), H2-DMa(-0.47), …
activation of GTPase activity	0.167246	0.115444	0.0237108	0.106323	71	0.15735	0.0961388	0.271399	0.339888	0.135143	Epha2(0.43), Gpr65(0.4), Sgsm1(0.33), Tbc1d15(0.31), Rhog(0.3), Tbc1d8(0.24), Tbc1d9(0.24), Pip5k1a(0.16), Tbc1d12(0.15), Tax1bp3(0.13), Eif5(0.12), Tbc1d25(0.11), Ptk2b(0.1), Tbc1d10b(0.1), Rundc1(0.1), Ralgapb(0.09), Ralgapb(0.09), Coro1c(0.08), Coro1c(0.08), Rcc2(0.08), Tbc1d1(0.07), Tbc1d30(0.07), Dock7(0.06), Scrib(0.05), Tbc1d22a(0.05), Rabgap1(0.05), Akt2(0.03), Ndel1(0.03), Ntrk3(0.01), F…
cell fate determination	0.110071	0.274854	0.0237816	0.106506	13	0.00882886	0.276389	0.28225	0.301434	0.356646	Ptch1(0.09), Notch2(0), Notch2(0), Ctnnb1(-0.03), Jag2(-0.03), Pax2(-0.1), Ptch2(-0.1), Gata2(-0.13), Hoxa2(-0.25), Gata3(-0.26), Prox1(-0.27), Cyp26b1(-0.48), Chrdl1(-0.77),
negative regulation of peptidyl-serine phosphorylation	0.150148	0.184834	0.0238928	0.106797	27	0.063411	0.396536	0.276492	0.202648	0.112908	Bdkrb2(0.5), Ddit4(0.5), Rassf2(0.42), Pde4d(0.28), Hgf(0.16), Ppm1f(0.15), Paqr3(0.13), Rack1(0.08), Nck2(0.08), Bak1(0.07), Smad7(0.02), Smad7(0.02), Nck1(0.02), Bax(0.01), Ogt(-0.07), Cav1(-0.12), Cnksr3(-0.12), Inpp5k(-0.15), Inpp5k(-0.15), Inpp5f(-0.22), Dmd(-0.29), Gpd1l(-0.32), Mlxipl(-0.55), Nos1(-0.56), Inpp5j(-0.58), Inpp5j(-0.58), Dmtn(-0.84),
embryonic digit morphogenesis	0.107585	0.130365	0.023907	0.106797	68	0.121098	0.419279	0.136498	0.746225	0.00441678	Nog(0.78), Chst11(0.52), Sfrp2(0.38), Gja1(0.23), Ttbk2(0.23), Wnt7a(0.22), Zbtb16(0.21), Mfsd7b(0.17), Smad4(0.13), Bmpr1a(0.11), Impad1(0.11), Tulp3(0.09), Lnpk1(0.09), Twist1(0.07), Hdac1(0.07), Ece1(0.06), Tmem231(0.06), Hdac2(0.05), Fbxw4(0.04), Zak(0.04), Zak(0.04), Mycn(0.02), Tmem107(0.02), Mks1(0.01), Gnaq(-0.01), Ctnnb1(-0.03), Ctnnb1(-0.03), Gli3(-0.03), Gli3(-0.03), Hoxd11(-0.03), Hox…
M band	0.162595	0.267227	0.0245414	0.109355	12	0.141542	0.288511	0.0573558	0.13309	0.46817	Hspb1(0.9), Cryab(0.18), Fhl2(0.18), Ppp2r5a(0.06), S100a1(0.05), Sptbn1(-0.12), Ank1(-0.24), Myom1(-0.31), Myom2(-0.39), Ank2(-0.57), Ank2(-0.57), Ttn(-0.73),
retinoic acid receptor signaling pathway	0.0927451	0.273477	0.024659	0.109602	18	0.312558	0.735563	0.398652	0.08434	0.00184477	Rxrb(0.17), Nr1h2(0.16), Pml(0.13), Rarg(0.04), Rarg(0.04), Rxra(0.01), Rxra(0.01), Rxra(0.01), Rarb(-0.01), Snw1(-0.03), Rara(-0.06), Kmt2e(-0.07), Actn4(-0.09), Aldh1a2(-0.33), Aldh1a2(-0.33), Esrrg(-0.38), Cyp26b1(-0.48), Cyp26b1(-0.48),
DNA methylation	0.12875	0.233166	0.024837	0.110255	29	0.438981	0.0654335	0.206458	0.483385	0.0311475	Dnmt3l(0.26), Dnmt3l(0.26), Ezh2(0.18), Mta2(0.13), Gatad2b(0.11), Bend3(0.06), Baz2a(0.05), Gnas(0.03), Meg3(0.03), Meg3(0.03), Atf7ip(0.02), Ehmt1(0.02), Dnmt1(-0.01), Dnmt1(-0.01), Dnmt3b(-0.02), Dnmt3b(-0.02), Bmi1(-0.04), Ctcf(-0.07), Ctcf(-0.07), Kmt2e(-0.07), Kmt2a(-0.07), Gatad2a(-0.07), Ehmt2(-0.08), Mtrr(-0.09), Mbd4(-0.14), Dnmt3a(-0.18), Dnmt3a(-0.18), Dnmt3a(-0.18), Hells(-0.3),
negative regulation of cell size	0.127079	0.288483	0.0249582	0.110654	12	0.218188	0.0116486	0.4365	0.297021	0.259618	Akt1(0.11), Cfl1(0.11), Akt1s1(0.11), Tsc1(0), Tsc1(0), Mtor(-0.07), Mtor(-0.07), Pten(-0.1), Rdx(-0.1), Tsc2(-0.17), Cav3(-0.32), Deptor(-0.32),
cholesterol metabolic process	0.0900307	0.12327	0.0253146	0.111954	81	0.19638	0.109317	0.178207	0.0235131	0.733172	Saa1(1.34), Apoa1(0.51), Apoa1(0.51), Apoa1(0.51), Apobr(0.41), Lcat(0.37), Lcat(0.37), Ch25h(0.35), Npc1(0.3), Soat2(0.26), Soat2(0.26), Ldlrap1(0.24), Tm7sf2(0.23), Pcsk9(0.22), Srebf1(0.18), Abcg1(0.15), Pmvk(0.15), Ebp(0.12), Hmgcr(0.11), Cyb5r3(0.11), Apob(0.11), Fdft1(0.1), Npc2(0.1), Cln8(0.09), Insig1(0.09), Soat1(0.08), Soat1(0.08), Mbtps2(0.07), Angptl3(0.06), Hdlbp(0.06), Fech(0.04), P…
protein heterotrimerization	0.143337	0.255444	0.0256194	0.113019	16	0.32692	0.197035	0.176385	0.15318	0.134289	Nup54(0.17), Gnb1(0.13), C1qtnf1(0.13), Ppp2ca(0.12), Nupl1(0.1), Wiz(0.04), Wiz(0.04), Gnaq(-0.01), Gna11(-0.06), Ogt(-0.07), C1qtnf6(-0.28), Col6a2(-0.48), Col1a2(-0.51), Col6a1(-0.63), Col1a1(-0.68), Adipoq(-3.04),
nBAF complex	0.146787	0.282459	0.0257191	0.113087	12	0.288817	0.0874996	0.180424	0.429202	0.0884901	Ss18l1(0.06), Smarcd1(0.05), Smarcc1(0.03), Smarce1(0.02), Smarcb1(-0.01), Smarcc2(-0.01), Smarca4(-0.02), Arid1a(-0.03), Smarcd3(-0.08), Smarca2(-0.16), Arid1b(-0.16), Dpf3(-0.94),
regulation of small GTPase mediated signal transduction	0.163369	0.236819	0.0257242	0.113087	16	0.199645	0.179779	0.055663	0.539703	0.134892	Arhgap26(0.16), Sipa1(0.14), Ralgapb(0.09), Garnl3(0), Cdc42bpa(0), Sipa1l2(-0.03), Chn1(-0.04), Amot(-0.08), Ralgapa1(-0.08), Sipa1l3(-0.11), Rap1gap2(-0.14), Tsc2(-0.17), Sipa1l1(-0.17), Ralgapa2(-0.26), Arhgap18(-0.39), Rap1gap(-0.59),
mitochondrial respiratory chain complex IV	0.119094	0.304678	0.0257306	0.113087	14	0.0719273	0.445171	0.0546744	0.0316437	0.758895	AA467197(1.05), Cox6a1(0.07), COX1(0.05), Cox4i1(0.04), Cox8a(0.04), Ndufa4(0.04), Ndufa4(0.04), Cox5a(0.01), Cox5b(-0.03), Cox4i2(-0.23), Cox4i2(-0.23), Cox6a2(-0.36), Ndufa4l2(-0.89), Cox8b(-1.75),
nervous system development	0.0996238	0.0695655	0.0262206	0.114955	269	0.119683	0.842179	0.0846011	0.146987	0.0409731	Gal(1.34), Islr2(1.08), Fos(0.81), Chac1(0.76), Thbs4(0.74), Gdnf(0.72), Sema3a(0.71), Mdga1(0.57), Cxcr4(0.48), Crmp1(0.47), Sema7a(0.47), Mafk(0.44), Adgrv1(0.44), Sema4c(0.42), Gpsm1(0.41), Dscaml1(0.39), Gas7(0.38), Nbl1(0.38), Rtn4(0.35), Gfra1(0.34), Stmn1(0.34), Numbl(0.34), Nr4a2(0.32), Chd5(0.32), Enc1(0.31), Brsk1(0.3), Sh2b2(0.28), Dbn1(0.27), Amigo3(0.27), Efna5(0.26), Robo3(0.26), Im…
embryonic digestive tract development	0.162693	0.263425	0.0264736	0.115848	13	0.241125	0.158184	0.338557	0.198578	0.0869433	Ada(0.13), Pkdcc(0.11), Foxf1(0.03), Pcsk5(0), Pcsk5(0), Rarb(-0.01), Gli3(-0.03), Sall1(-0.15), Fgf9(-0.25), Aldh1a2(-0.33), Gli2(-0.47), Stra6(-0.51), Rarres2(-1.33),
response to ATP	0.149881	0.297621	0.0264908	0.115848	15	0.156322	0.310682	0.157975	0.199412	0.164333	Sell(1.11), Il1b(0.74), Il1b(0.74), P2rx7(0.16), P2rx7(0.16), P2rx7(0.16), Panx1(0.03), Casp1(0), P2rx4(0), P2rx1(-0.08), Dgkq(-0.14), Plcg2(-0.25), Pklr(-0.73), Slc8a1(-0.84), Trpc3(-1.62),
lysophospholipase activity	0.102932	0.332914	0.0265227	0.115848	12	0.032997	0.118412	0.0304497	0.321613	0.849212	Aspg(0.35), Pnpla8(0.05), Pnpla6(-0.01), Pnpla6(-0.01), Lypla1(-0.02), Pla2g4a(-0.08), Enpp2(-0.12), Enpp2(-0.12), Gdpd1(-0.18), Gdpd3(-0.19), Pnpla7(-0.25), Pnpla7(-0.25),
fatty acid oxidation	0.108949	0.268668	0.0267437	0.11667	17	0.103621	0.0274359	0.173218	0.251977	0.681934	Por(0.18), Adipor1(0.14), Adipor1(0.14), Ppard(0.11), Prkaa1(0.02), Adipor2(-0.01), Cd36(-0.02), Acox1(-0.05), Acox1(-0.05), Alox12(-0.05), Gcdh(-0.15), Mapk14(-0.17), Mlycd(-0.19), Pparg(-0.32), Hao2(-0.52), Cygb(-0.83), Adipoq(-3.04),
lipid storage	0.0531284	0.241442	0.0270119	0.117296	29	0.00906041	0.00616781	0.11799	0.249205	0.992229	Apoa1(0.51), Plin2(0.48), Pnpla2(0.34), Cry2(0.24), B4galnt1(0.24), Abhd4(0.2), Fitm2(0.18), Cry1(0.14), Dgat1(0.1), Angptl3(0.06), Cd36(-0.02), Cd36(-0.02), Stat5b(-0.05), Hexa(-0.08), Nrip1(-0.08), Ldah(-0.11), Cav1(-0.12), Hexb(-0.15), Hexb(-0.15), 4932438A13Rik(-0.15), Dgat2(-0.2), Dgat2(-0.2), Gm2a(-0.23), Stat5a(-0.23), Plin5(-0.24), Plin5(-0.24), Bscl2(-0.29), Fitm1(-0.34), Cidea(-2.04),
cellular response to UV-B	0.160337	0.292907	0.0270199	0.117296	10	0.219161	0.110186	0.465291	0.182149	0.0946021	Cdkn1a(0.54), Hyal3(0.18), Stk11(0.08), Stk11(0.08), Hyal1(-0.02), Hyal2(-0.11), Mme(-0.28), Crip1(-0.46), Crip1(-0.46), Mfap4(-0.48),
neuron projection	0.171597	0.0553093	0.0272696	0.118235	338	0.234406	0.501954	0.196877	0.0871187	0.0856798	Syt5(1.57), Arg1(1.48), Vgf(1.21), Ptgs2(1.16), Ptgs2(1.16), Sstr4(1.04), Chrnb4(0.95), Calca(0.84), Fos(0.81), Clu(0.67), Sphk1(0.66), Hsp90aa1(0.65), Kif1a(0.62), Npy(0.61), Glul(0.58), Fosl1(0.54), Nmb(0.51), Nefm(0.5), Klc3(0.46), Atf4(0.45), Ctsl(0.43), Rgs2(0.42), Stx1a(0.42), Stx1a(0.42), Bag3(0.41), Unc13a(0.41), Rtn4(0.35), Cpeb1(0.34), Stmn1(0.34), Entpd1(0.33), Csnk1e(0.33), Zwint(0.31…
Roundabout signaling pathway	0.117857	0.325983	0.027384	0.118586	10	0.405765	0.752944	0.0888466	0.0102483	0.141153	Myo9b(0.26), Robo3(0.26), Tpbgl(0.09), Rhoa(0.02), Robo2(-0.13), Slit3(-0.26), Slit3(-0.26), Robo1(-0.42), Slit2(-0.44), Slit2(-0.44),
smooth muscle tissue development	0.165511	0.243752	0.0277816	0.120014	16	0.232033	0.246756	0.297423	0.0423015	0.271752	Zfand5(0.33), Tiparp(0.33), Schip1(0.24), Ahr(0.06), Foxp1(0.06), Dlg1(-0.01), Eng(-0.09), Nf1(-0.09), Bmp4(-0.15), Ihh(-0.19), Zfp950(-0.22), Itga8(-0.29), Pdgfrb(-0.34), Tshz3(-0.37), Stra6(-0.51), Trp63(-0.92),
protein localization to organelle	0.160563	0.257443	0.0280256	0.120773	14	0.477584	0.181436	0.117602	0.27252	0.0650228	Ahi1(0.19), Pes1(0.08), Cog3(0.06), Bbs4(0.01), Ap3d1(-0.03), Dusp18(-0.04), Bbs2(-0.06), Cep68(-0.14), Bicd1(-0.18), Cep250(-0.18), Cog7(-0.18), Cntln(-0.2), Adrb1(-0.57), Crocc(-1.07),
renal system development	0.169523	0.213246	0.028165	0.121226	19	0.114349	0.598089	0.167142	0.081167	0.171216	Nup93(0.16), Prkcsh(0.06), Lzts2(0.06), Pkd2(0.05), Foxf1(0.03), Sox17(0.02), Sec63(0.01), Pkd1(0), Ctnnb1(-0.03), Itga6(-0.07), Pax2(-0.1), Itgb4(-0.1), Emx2(-0.12), Lhx1(-0.14), Bmp4(-0.15), Gata3(-0.26), Ift140(-0.3), Mecom(-0.31), Mtss1(-0.39),
morphogenesis of an epithelium	0.186722	0.233741	0.0282677	0.121487	15	0.221326	0.0936922	0.234027	0.233827	0.233952	Krt17(0.59), Serpinb5(0.43), Ripk4(0.16), Car2(0.15), Vcl(0.11), Hhex(0.1), Hoxa5(0.02), Timeless(0), Lrp6(-0.05), Wnt5a(-0.27), Fgfr3(-0.3), Gli2(-0.47), Frem2(-0.68), Fras1(-0.69), Car9(-0.81),
NAD+ binding	0.159278	0.255742	0.0282943	0.121487	13	0.049067	0.325853	0.303892	0.111115	0.335859	Sirt1(0.2), Glud1(0.1), Sirt6(0.03), Sirt2(0.03), Sirt4(-0.01), Hpgd(-0.06), Uxs1(-0.08), Sirt7(-0.09), Cryl1(-0.17), Hadh(-0.28), Sirt3(-0.28), Aldh1a3(-0.33), Sirt5(-0.37),
regulation of TOR signaling	0.105479	0.260054	0.0284376	0.121954	16	0.810985	0.14892	0.219662	0.166664	0.00919275	Slc7a1(0.15), Rheb(0.12), Tmem127(0.09), Slc7a3(0.03), Agpat9(0.01), Rragc(-0.01), Tti1(-0.03), Gna12(-0.07), Gna12(-0.07), Flcn(-0.12), Telo2(-0.13), Araf(-0.17), Fbxo9(-0.19), Rragb(-0.34), Pkhd1(-0.5), Fam83d(-0.58),
skin development	0.125518	0.14941	0.0285156	0.122141	49	0.623439	0.651181	0.133655	0.0250437	0.029383	Asprv1(0.93), Arrdc3(0.42), Ltb(0.34), Pdgfa(0.31), Itga3(0.26), Sfn(0.26), Sfn(0.26), Ptges3(0.19), Tfap2a(0.18), Tfap2a(0.18), Col5a2(0.17), Col5a2(0.17), Wdr48(0.14), Irf6(0.13), Irf6(0.13), Slc27a4(0.12), Aars(0.09), Eda(0.03), Gnas(0.03), Apc(0.01), Dbi(-0.01), Ercc2(-0.01), Abcb6(-0.01), Adamts2(-0.01), Ctnnb1(-0.03), Itga6(-0.07), Jup(-0.07), Wnt10a(-0.08), Gpr89(-0.08), Ptch2(-0.1), Itgb4…
chemical synaptic transmission	0.165321	0.11693	0.0285554	0.122163	76	0.189297	0.203983	0.114136	0.578586	0.0618391	Tac1(1.42), Sstr4(1.04), Pcdh8(0.77), Slc12a5(0.61), Cacna1a(0.49), Cacna1a(0.49), Unc13a(0.41), Penk(0.36), Htr1b(0.29), Htr1b(0.29), Slc6a12(0.27), Nrxn2(0.27), Cacnb3(0.24), Unc13b(0.23), Slc12a4(0.22), Fgf12(0.21), Sdcbp(0.2), Hcrtr1(0.2), Usp14(0.14), Ston2(0.13), Lrp8(0.09), Pafah1b1(0.07), Gjc1(0.06), Snca(0.05), Dlg3(0.05), Vdac3(0.04), Apba3(0.04), Gipc1(0.04), Cacnb2(0.03), Tpgs1(0.03),…
phosphatidylinositol-mediated signaling	0.186082	0.177468	0.0286755	0.122343	26	0.192575	0.205318	0.362118	0.140886	0.129331	Ezr(0.23), Pik3cd(0.2), Gab2(0.16), Pik3cb(0.13), Pik3cg(0.1), Ncs1(0.04), Pi4kb(0.04), Pik3c2a(0.02), Pik3ca(0.01), Pik3c3(0.01), Synj1(-0.01), Exoc1(-0.04), Igf1r(-0.05), Ptafr(-0.05), Ogt(-0.07), Pi4ka(-0.09), Gsn(-0.09), Plch1(-0.16), Csf1r(-0.2), Inpp5f(-0.22), Car8(-0.33), Npr3(-0.33), Pdgfra(-0.34), Pdgfrb(-0.34), Pik3c2g(-0.44), Igf1(-0.87),
positive regulation of transcription regulatory region DNA binding	0.137867	0.272555	0.028701	0.122343	13	0.266883	0.708341	0.0590876	0.0523162	0.161073	Tgfb1(0.26), Klf4(0.24), Twist1(0.07), Park7(0.01), Traf6(-0.04), Kat2a(-0.08), Rb1(-0.12), Trim6(-0.13), Gata3(-0.26), Gata3(-0.26), Parp1(-0.34), Lgals9(-0.4), Igf1(-0.87),
carboxy-lyase activity	0.154559	0.218211	0.0287414	0.122367	19	0.173778	0.0393487	0.136854	0.298127	0.529619	Hdc(0.82), Pisd(0.14), Odc1(0.08), Sgpl1(0.08), Amd1(0.07), Umps(0.01), Pdxdc1(-0.04), Uxs1(-0.08), Pck1(-0.12), Pck2(-0.12), Paics(-0.13), Csad(-0.15), Echdc1(-0.16), Ppcdc(-0.16), Ddc(-0.17), Urod(-0.18), Mlycd(-0.19), Mvd(-0.37), Acmsd(-0.92),
Rac guanyl-nucleotide exchange factor activity	0.113371	0.265431	0.028917	0.122967	15	0.0106182	0.191955	0.353143	0.650099	0.140967	Vav1(0.2), Farp1(0.04), Eps8l1(0.02), Arhgef2(0.01), Als2(0.01), Kalrn(0), Vav3(-0.09), Eps8l2(-0.09), Spata13(-0.1), Tiam1(-0.21), Tiam1(-0.21), Dock2(-0.22), Farp2(-0.24), Prex2(-0.36), Arhgef4(-0.41),
positive regulation of cardiac muscle cell proliferation	0.147973	0.242514	0.0290584	0.12342	19	0.072254	0.664609	0.0746857	0.0861743	0.345922	Gata6(0.23), Bmpr1a(0.11), Zfpm2(0.09), Fgfr2(0.08), Rbpj(0.04), Notch1(0.03), Hey2(0), Fgf2(-0.03), Fgfr1(-0.03), Fgfr1(-0.03), Ncam1(-0.13), Cdk1(-0.17), Mapk14(-0.17), Tbx2(-0.18), Fgf9(-0.25), Fgf9(-0.25), Fgf9(-0.25), Mef2c(-0.29), Erbb4(-0.63),
positive regulation of fat cell differentiation	0.0944896	0.180601	0.0291844	0.123658	53	0.0321161	0.759797	0.524556	0.00517193	0.27919	Sult1e1(1.98), Cebpb(0.52), Sav1(0.48), Zfp36(0.41), Uchl3(0.39), Sfrp2(0.38), Zfp36l1(0.31), Noct(0.24), Zbtb7c(0.24), Zc3h12a(0.21), Zc3h12a(0.21), Zc3h12a(0.21), Zbtb16(0.21), Xbp1(0.19), Stk3(0.19), Medag(0.18), Zfp385a(0.14), Sh3pxd2b(0.14), Akt1(0.11), Bmp2(0.11), Klf5(0.1), Creb1(0.09), Stk4(0.06), Wdfy2(0.03), Wdfy2(0.03), Carm1(0.02), Trpm4(-0.02), Fndc3b(-0.02), Fndc3b(-0.02), Tmem64(-0…
protein oligomerization	0.182081	0.118285	0.0292462	0.123772	59	0.250034	0.36743	0.183737	0.0882159	0.167391	Mmp9(1.42), Camk2d(0.42), Bcl10(0.32), Hgsnat(0.24), Gja1(0.23), Zc3h12a(0.21), Chp1(0.2), Shank3(0.19), Camk2g(0.16), P2rx7(0.16), Dgkh(0.16), Nme2(0.13), Sh3glb1(0.12), Ahnak(0.12), Znhit6(0.11), Stx2(0.09), Npm1(0.09), Trim28(0.09), Amfr(0.09), Keap1(0.09), Cabyr(0.09), Nufip1(0.08), Dvl2(0.07), Irak1(0.07), Nbr1(0.06), Dnm1l(0.02), Bax(0.01), BC068281(0.01), Cav2(0), Gja5(-0.01), Ppp5c(-0.01)…
acid phosphatase activity	0.107427	0.323472	0.0293211	0.12394	13	0.152445	0.00492405	0.29379	0.275616	0.697518	Acpp(0.45), Acpp(0.45), Ppip5k1(0.18), Acp1(-0.02), Minpp1(-0.02), Pxylp1(-0.07), Acp5(-0.09), Acp5(-0.09), Acp2(-0.18), Acp2(-0.18), Acp2(-0.18), Ppip5k2(-0.18), Acp6(-0.23),
phosphatidylinositol phospholipase C activity	0.103201	0.263435	0.029819	0.125895	17	0.256854	0.938763	0.0349575	0.180783	0.00870116	Ccr1(0.4), Plcd1(0.22), Plcg1(0.09), Plce1(0.07), Plcl2(0.04), Ccl5(0.03), Plcb4(0.01), Plcb3(0), Plcd3(-0.02), Plcl1(-0.15), Plch1(-0.16), Plcb2(-0.17), Plcg2(-0.25), Plcb1(-0.52), Plcb1(-0.52), Plcd4(-0.57), Plch2(-0.91),
negative regulation of platelet-derived growth factor receptor signaling pathway	0.145156	0.327181	0.0299562	0.126192	10	0.0255626	0.369643	0.342975	0.0511101	0.545675	Ptprj(0.1), Ptprj(0.1), Inppl1(0.05), Snca(0.05), Apod(-0.1), Ptgir(-0.14), Slc9a3r1(-0.28), Ndrg4(-0.33), Adipoq(-3.04), Adipoq(-3.04),
regulation of smoothened signaling pathway	0.131798	0.225143	0.0299609	0.126192	22	0.0199485	0.118815	0.0822276	0.851975	0.265715	Ttbk2(0.23), Rora(0.15), Ptch1(0.09), Ptch1(0.09), Tulp3(0.09), Fgfr2(0.08), Tctn1(0.08), Mks1(0.01), Rab23(-0.04), Fuz(-0.09), Ift88(-0.1), C2cd3(-0.12), C2cd3(-0.12), Intu(-0.13), Ttc21b(-0.15), Rpgrip1l(-0.19), Arl6(-0.21), Gas1(-0.24), Ift140(-0.3), Ankmy2(-0.37), Gli2(-0.47), Ift172(-0.51),
superoxide metabolic process	0.162119	0.195608	0.030122	0.12672	23	0.196677	0.172304	0.163089	0.467257	0.0902976	Ncf2(0.44), Sh3pxd2a(0.15), Sh3pxd2a(0.15), Sod1(0.14), Sod1(0.14), Sh3pxd2b(0.14), Sh3pxd2b(0.14), Nrros(0.06), Nos2(0.03), Cyba(-0.01), Cbs(-0.02), Cyb5r4(-0.05), Cyb5r4(-0.05), Ccs(-0.15), Immp2l(-0.15), Sod2(-0.18), Sod2(-0.18), Nqo1(-0.19), Nox4(-0.23), Sod3(-0.26), Cybb(-0.39), Cybb(-0.39), Noxo1(-0.4),
negative regulation of lipid catabolic process	0.146332	0.263359	0.0303428	0.127346	15	0.0278729	0.210916	0.128931	0.191116	0.700953	Il1b(0.74), Hcar2(0.68), Pde3b(0.28), Crtc3(0.13), Prkaa1(0.02), Adra2a(-0.05), Fmc1(-0.05), Apoa2(-0.06), Adora1(-0.08), Plin5(-0.24), Tnf(-0.26), Bscl2(-0.29), Acacb(-0.82), Cidea(-2.04), Cidea(-2.04),
hindbrain development	0.153154	0.277625	0.0306564	0.128358	12	0.349441	0.123224	0.0858979	0.619628	0.0574668	Smad1(0.42), Kdm2b(0.09), Smad9(0.08), Smarca4(-0.02), Ctnnb1(-0.03), Hnf1b(-0.05), Nfib(-0.11), Wls(-0.23), Aldh1a2(-0.33), Hoxa1(-0.44), Gli2(-0.47), Gli2(-0.47),
negative regulation of Ras protein signal transduction	0.148743	0.180775	0.0312855	0.130837	28	0.11861	0.67067	0.172263	0.207425	0.0481342	Spry2(0.3), Rabgef1(0.28), Ppp2cb(0.26), Rasa2(0.16), Tnk1(0.08), Rapgef1(0.07), Stambp(0.05), Rasal2(0.01), Tgfb2(0), Dab2ip(-0.01), Dab2ip(-0.01), Rasa1(-0.04), Fbp1(-0.05), Spry1(-0.05), Rasa3(-0.06), Rasa4(-0.06), Nf1(-0.09), Nf1(-0.09), Dgkz(-0.1), Mfn2(-0.15), Mapkap1(-0.16), Syngap1(-0.21), Syngap1(-0.21), Timp2(-0.34), Rasal3(-0.43), Rasal3(-0.43), Trim67(-0.98), Rasal1(-1.35),
neuronal action potential	0.129262	0.321364	0.0317158	0.132346	12	0.463921	0.249099	0.0769437	0.0593478	0.345908	Drd1(0.57), Myh14(0.13), Kcna1(0.11), Kcna1(0.11), Scn5a(0.07), P2rx4(0), P2rx1(-0.08), P2rx5(-0.09), Ank3(-0.41), Kcnma1(-0.54), Scn7a(-0.64), Catsper4(-0.68),
insulin-like growth factor receptor binding	0.186944	0.24122	0.031721	0.132346	15	0.168341	0.208033	0.191409	0.321027	0.149456	Socs2(0.38), Ywhag(0.36), Igf2(0.15), Igf2(0.15), Shc1(0.14), Socs1(0.13), Ren1(0.13), Gnas(0.03), Gnas(0.03), Insr(-0.11), Irs1(-0.24), Pik3r1(-0.24), Arrb1(-0.32), Igf1(-0.87), Igf1(-0.87),
telomere maintenance via recombination	0.145707	0.278965	0.0333374	0.138762	12	0.285719	0.0190474	0.442926	0.390686	0.149221	Smc5(0.18), Nsmce2(0.14), Xrcc3(0.14), Smc6(0.08), Rad50(-0.05), Rad51d(-0.15), Wrn(-0.19), Tep1(-0.21), Tep1(-0.21), Brca2(-0.33), Rad51c(-0.48), Rad51(-0.51),
apolipoprotein binding	0.180856	0.249268	0.0333823	0.138786	13	0.290135	0.277594	0.409772	0.100922	0.0732728	Pcsk9(0.22), Lrp8(0.09), Scarb1(0.06), Scarb1(0.06), Canx(-0.01), Lrp6(-0.05), Lpl(-0.06), Abca1(-0.11), Mttp(-0.13), Lrp1(-0.26), Mapt(-0.3), Vldlr(-0.37), Lrp4(-0.49),
branching involved in ureteric bud morphogenesis	0.140906	0.157588	0.0335808	0.139284	41	0.0600375	0.403834	0.529996	0.347571	0.0239189	Pgf(1.53), Gdnf(0.72), Gdnf(0.72), Sox9(0.41), Foxd1(0.37), Cd44(0.33), Myc(0.18), Smad4(0.13), Bmp2(0.11), Ptch1(0.09), Gzf1(0.09), Wt1(0.08), Wt1(0.08), Lama5(0.01), Timeless(0), Dlg1(-0.01), Ctnnb1(-0.03), Fgf2(-0.03), Gli3(-0.03), Hoxd11(-0.03), Hoxa11(-0.04), Ctnnbip1(-0.04), Bcl2(-0.06), Bcl2(-0.06), Pax2(-0.1), Pax2(-0.1), Lhx1(-0.14), Bmp4(-0.15), Bmp4(-0.15), Sall1(-0.15), Tcf21(-0.16), …
ligand-dependent nuclear receptor binding	0.167611	0.210358	0.0343358	0.142002	24	0.225814	0.037998	0.219724	0.323249	0.377498	Jund(0.34), Sra1(0.23), Tada3(0.12), Nrbf2(0.09), Trip4(0.07), Ncor2(0.05), Ncor2(0.05), Uba3(0.05), Trim24(0.04), Smarce1(0.02), Med1(-0.01), Mecr(-0.01), Ncoa2(-0.03), Ncoa2(-0.03), Arid1a(-0.03), Ncoa3(-0.06), Ncoa3(-0.06), C1d(-0.1), Ncor1(-0.15), Ncoa1(-0.19), Ncoa1(-0.19), Prox1(-0.27), Slc30a9(-0.27), Ppargc1a(-0.44),
dendrite	0.123972	0.0587387	0.0343566	0.142002	328	0.146813	0.894344	0.0401131	0.184882	0.0522103	Nrgn(1.19), Cdk5r1(1.12), Syn1(1), Mmp3(0.93), Hspb1(0.9), Glrx(0.9), Ctla2a(0.85), Hdc(0.82), Alox5(0.77), Sema3a(0.71), Drd1(0.57), Adrb2(0.54), Slc38a2(0.53), Cacna1a(0.49), Ncf1(0.48), Crmp1(0.47), Plk2(0.42), Plk3(0.37), Penk(0.36), Penk(0.36), Kif3c(0.31), Zwint(0.31), Htr1b(0.29), D230025D16Rik(0.29), Rps6(0.28), Rps6(0.28), Kcnj2(0.27), Pdgfb(0.25), Maf1(0.25), Nr1d1(0.25), Nr1d1(0.25), T…
female pregnancy	0.175359	0.211551	0.0350039	0.14434	21	0.0545642	0.522088	0.340377	0.152669	0.142709	Sult1e1(1.98), Thbd(0.9), Corin(0.11), Corin(0.11), Cuzd1(0.1), Oxtr(0.04), Cr1l(0.03), H2-Q2(0.03), Pcsk5(0), Epn1(-0.02), Adra2a(-0.05), Stat5b(-0.05), Stat5b(-0.05), Hpgd(-0.06), Ddr1(-0.1), Comt(-0.23), Stat5a(-0.23), Igfbp5(-0.31), Lgals9(-0.4), Adra2b(-0.45), Hsd11b2(-1.29),
positive regulation of calcium ion transport	0.112072	0.207565	0.0359249	0.147432	26	0.148842	0.678171	0.00306917	0.526835	0.219682	Ccr1(0.4), Arrb2(0.21), Wnk3(0.19), Wnk3(0.19), Mgea5(0.15), Stim2(0.14), Homer1(0.12), Aqp2(0.06), Wfs1(0.05), Tspo(0.04), Orai1(0.04), Cacnb2(0.03), Ccl5(0.03), Ednra(0.02), Jak3(-0.04), Trpc6(-0.04), Cldn16(-0.06), F2r(-0.19), Mylk(-0.2), Cacna1d(-0.34), Itpr1(-0.44), Ank2(-0.57), Atp2b2(-0.62), Lpar3(-0.65), Mchr1(-0.66), Ccl4(-0.87),
phospholipid transport	0.196101	0.181298	0.0359797	0.147432	26	0.139774	0.254263	0.208437	0.168622	0.305177	Apoa1(0.51), Atp10a(0.22), Osbpl5(0.12), Atp9b(0.1), Pitpna(0.09), Scarb1(0.06), Triap1(0.06), Atp11a(0.04), Stard10(0.03), Slmo2(0.01), Atp9a(-0.01), Atp8b2(-0.03), Tmem30a(-0.05), Atp11c(-0.05), Atp8b1(-0.06), Abca1(-0.11), Mttp(-0.13), Ldlr(-0.14), Atp8a1(-0.18), Pctp(-0.19), Pctp(-0.19), Stard7(-0.19), Osbpl8(-0.19), Scp2(-0.2), Scp2(-0.2), Prelid2(-0.63),
holo TFIIH complex	0.179533	0.255168	0.0359959	0.147432	16	0.351004	0.0870615	0.416411	0.0740504	0.266305	Gtf2f2(0.24), Gtf2h1(0.08), Gtf2h1(0.08), Ercc5(0.05), Mnat1(0.04), Mnat1(0.04), Psmc5(0.04), Ercc2(-0.01), Ercc3(-0.03), Gtf2h2(-0.04), Gtf2h4(-0.06), Gtf2h4(-0.06), Cdk7(-0.08), Ccnh(-0.2), Gtf2h3(-0.22), Gtf2h3(-0.22),
N-ethylmaleimide reductase activity	0.109021	0.189835	0.0360872	0.147432	29	0.181197	0.00822365	0.255182	0.476006	0.503037	Cybrd1(0.56), Kdm1a(0.27), Vat1(0.25), Gfod1(0.16), Fa2h(0.13), Gfod2(0.07), Aifm2(0.06), Sccpdh(0.03), BC026585(0.01), Marc2(0), Aifm3(0), Glyr1(-0.02), Cyb561a3(-0.03), Frrs1(-0.04), Zadh2(-0.05), Cryzl1(-0.06), Cbr4(-0.06), Enox2(-0.09), Heph(-0.12), Hsdl2(-0.16), Phyhd1(-0.16), Pyroxd2(-0.2), Oxnad1(-0.21), 4833439L19Rik(-0.25), Kdm1b(-0.27), Foxred1(-0.27), Cybb(-0.39), Fmo1(-0.54), Enox1(-0…
reduced coenzyme F420 dehydrogenase activity	0.109021	0.189835	0.0360872	0.147432	29	0.181197	0.00822365	0.255182	0.476006	0.503037	Cybrd1(0.56), Kdm1a(0.27), Vat1(0.25), Gfod1(0.16), Fa2h(0.13), Gfod2(0.07), Aifm2(0.06), Sccpdh(0.03), BC026585(0.01), Marc2(0), Aifm3(0), Glyr1(-0.02), Cyb561a3(-0.03), Frrs1(-0.04), Zadh2(-0.05), Cryzl1(-0.06), Cbr4(-0.06), Enox2(-0.09), Heph(-0.12), Hsdl2(-0.16), Phyhd1(-0.16), Pyroxd2(-0.2), Oxnad1(-0.21), 4833439L19Rik(-0.25), Kdm1b(-0.27), Foxred1(-0.27), Cybb(-0.39), Fmo1(-0.54), Enox1(-0…
sulfur oxygenase reductase activity	0.109021	0.189835	0.0360872	0.147432	29	0.181197	0.00822365	0.255182	0.476006	0.503037	Cybrd1(0.56), Kdm1a(0.27), Vat1(0.25), Gfod1(0.16), Fa2h(0.13), Gfod2(0.07), Aifm2(0.06), Sccpdh(0.03), BC026585(0.01), Marc2(0), Aifm3(0), Glyr1(-0.02), Cyb561a3(-0.03), Frrs1(-0.04), Zadh2(-0.05), Cryzl1(-0.06), Cbr4(-0.06), Enox2(-0.09), Heph(-0.12), Hsdl2(-0.16), Phyhd1(-0.16), Pyroxd2(-0.2), Oxnad1(-0.21), 4833439L19Rik(-0.25), Kdm1b(-0.27), Foxred1(-0.27), Cybb(-0.39), Fmo1(-0.54), Enox1(-0…
malolactic enzyme activity	0.109021	0.189835	0.0360872	0.147432	29	0.181197	0.00822365	0.255182	0.476006	0.503037	Cybrd1(0.56), Kdm1a(0.27), Vat1(0.25), Gfod1(0.16), Fa2h(0.13), Gfod2(0.07), Aifm2(0.06), Sccpdh(0.03), BC026585(0.01), Marc2(0), Aifm3(0), Glyr1(-0.02), Cyb561a3(-0.03), Frrs1(-0.04), Zadh2(-0.05), Cryzl1(-0.06), Cbr4(-0.06), Enox2(-0.09), Heph(-0.12), Hsdl2(-0.16), Phyhd1(-0.16), Pyroxd2(-0.2), Oxnad1(-0.21), 4833439L19Rik(-0.25), Kdm1b(-0.27), Foxred1(-0.27), Cybb(-0.39), Fmo1(-0.54), Enox1(-0…
epoxyqueuosine reductase activity	0.109021	0.189835	0.0360872	0.147432	29	0.181197	0.00822365	0.255182	0.476006	0.503037	Cybrd1(0.56), Kdm1a(0.27), Vat1(0.25), Gfod1(0.16), Fa2h(0.13), Gfod2(0.07), Aifm2(0.06), Sccpdh(0.03), BC026585(0.01), Marc2(0), Aifm3(0), Glyr1(-0.02), Cyb561a3(-0.03), Frrs1(-0.04), Zadh2(-0.05), Cryzl1(-0.06), Cbr4(-0.06), Enox2(-0.09), Heph(-0.12), Hsdl2(-0.16), Phyhd1(-0.16), Pyroxd2(-0.2), Oxnad1(-0.21), 4833439L19Rik(-0.25), Kdm1b(-0.27), Foxred1(-0.27), Cybb(-0.39), Fmo1(-0.54), Enox1(-0…
positive regulation of MAPK cascade	0.117475	0.128492	0.0361593	0.147557	94	0.313853	0.767306	0.234113	0.164522	0.0052022	Il6(1.08), Sstr4(1.04), Osm(1), Il11(0.92), Il11(0.92), Itgb3(0.82), Relt(0.74), Lif(0.73), Igfbp3(0.67), Adrb2(0.54), Cd84(0.34), Pdgfa(0.31), Pdgfb(0.25), Ptprc(0.24), Flt4(0.23), Itgb1(0.22), Flt1(0.19), Itgav(0.19), Tnfrsf1b(0.18), Traf7(0.17), P2rx7(0.16), Dnajc27(0.16), Igf2(0.15), C1qtnf1(0.13), Cdc42(0.12), Kit(0.12), Ltbr(0.12), Bmp2(0.11), Lpar1(0.11), Hras(0.1), Nenf(0.1), Ripk1(0.09),…
inositol bisphosphate phosphatase activity	0.151166	0.213833	0.0363128	0.148012	23	0.444468	0.0335022	0.368565	0.0439545	0.499739	Mtmr14(0.21), Dusp11(0.11), Nt5dc3(0.11), Nt5c(0.1), Ptpdc1(0.09), Ctdspl2(0.08), Phpt1(0.01), Mtmr6(0.01), Mdp1(0), Tns2(0), Sgpp2(-0.01), Plpp6(-0.02), Sacm1l(-0.06), Nt5m(-0.07), Pxylp1(-0.07), Mtmr7(-0.11), Nt5dc1(-0.11), Inpp5k(-0.15), Inpp5k(-0.15), Fig4(-0.17), Lhpp(-0.2), Epm2a(-0.24), Sgpp1(-0.26),
NADPH:sulfur oxidoreductase activity	0.114933	0.181086	0.0372119	0.151502	30	0.221867	0.0133198	0.176366	0.521993	0.447361	Cybrd1(0.56), Kdm1a(0.27), Vat1(0.25), Gfod1(0.16), Fa2h(0.13), Gfod2(0.07), Aifm2(0.06), Sccpdh(0.03), BC026585(0.01), Marc2(0), Aifm3(0), Glyr1(-0.02), Cyb561a3(-0.03), Frrs1(-0.04), Zadh2(-0.05), Cryzl1(-0.06), Cbr4(-0.06), Enox2(-0.09), Heph(-0.12), Hsdl2(-0.16), Phyhd1(-0.16), Mical2(-0.16), Pyroxd2(-0.2), Oxnad1(-0.21), 4833439L19Rik(-0.25), Kdm1b(-0.27), Foxred1(-0.27), Cybb(-0.39), Fmo1(-…
learning	0.194125	0.152672	0.0375055	0.152522	36	0.184566	0.422595	0.0678052	0.220484	0.26604	Ptgs2(1.16), Slc12a5(0.61), Drd1(0.57), Jun(0.46), Abl2(0.22), Shank3(0.19), Shank3(0.19), Arf4(0.12), Eif2ak4(0.1), Pak6(0.1), Uba6(0.1), Atad1(0.05), Vdac3(0.04), Mecp2(0), Synj1(-0.01), Synj1(-0.01), Gmfb(-0.02), Htt(-0.06), Ephb2(-0.07), Bdnf(-0.09), Aaas(-0.12), Vdac1(-0.13), Atp8a1(-0.18), Chrnb2(-0.2), Chrnb2(-0.2), Comt(-0.23), Ptgs1(-0.24), Ntrk2(-0.27), Reln(-0.36), Park2(-0.42), Rgs14(…
positive regulation of Notch signaling pathway	0.116472	0.190096	0.0378411	0.153358	33	0.161194	0.80223	0.427903	0.0841167	0.0115318	Mfng(0.25), Dll4(0.2), Nepro(0.17), Tspan17(0.15), Pdcd10(0.13), Kit(0.12), Stat3(0.11), Jag1(0.08), Tspan5(0.06), Tspan5(0.06), Notch1(0.03), Hes1(0.01), Slc35c2(0.01), Tspan14(0), Tspan14(0), Itgb1bp1(-0.02), Dll1(-0.03), Dll1(-0.03), Dll1(-0.03), Jag2(-0.03), Poglut1(-0.09), Tspan33(-0.09), Tspan15(-0.14), Nod2(-0.14), Nov(-0.15), Aak1(-0.17), Aak1(-0.17), Rfng(-0.18), Lfng(-0.2), Erh(-0.27), …
positive regulation of lipid biosynthetic process	0.183163	0.250743	0.0386008	0.156258	13	0.120394	0.138245	0.180019	0.299031	0.402166	Akt1(0.11), Creb1(0.09), Apoe(-0.01), Apoe(-0.01), Dbi(-0.01), Sirt4(-0.01), Mtor(-0.07), Abhd6(-0.08), Crebl2(-0.08), Sorbs1(-0.11), Tcf7l2(-0.13), Ccdc3(-0.46), Mlxipl(-0.55),
organelle organization	0.137988	0.27135	0.0387596	0.156543	13	0.238333	0.0234624	0.476336	0.234598	0.320801	Atp2a2(0.15), Gorasp2(0.12), Atg7(0.06), Mul1(0.04), Tor1a(0), Hps6(-0.01), Hps3(-0.08), Dtnbp1(-0.08), Hps1(-0.08), Hps4(-0.11), Rab38(-0.28), Hps5(-0.34), Atp2b2(-0.62),
positive regulation of cell-substrate adhesion	0.147005	0.199349	0.039065	0.157238	32	0.327814	0.487874	0.101341	0.245413	0.0668267	Spp1(0.53), Cyr61(0.4), Thbs1(0.36), Itga5(0.33), Rac1(0.3), Dbn1(0.27), Itga3(0.26), Itgb1(0.22), Jak2(0.16), Ppm1f(0.15), Smoc2(0.13), Lims1(0.13), Rsu1(0.09), Spock2(0.04), Foxf1(0.03), Hsd17b12(-0.01), Nid1(-0.03), Itga6(-0.07), Prkce(-0.07), Prkce(-0.07), Col8a1(-0.09), Emilin1(-0.29), Ecm2(-0.32), Npnt(-0.34), Abi3bp(-0.44), Fbln2(-0.47), Edil3(-0.55), Egfl6(-0.6), Egflam(-0.61), Ccdc80(-0.…
regulation of gene expression	0.171972	0.0697152	0.0393099	0.158044	184	0.147132	0.210207	0.521395	0.0655815	0.266873	Nfe2(1.62), Gdnf(0.72), Eomes(0.57), Nfkbia(0.48), Fam46a(0.47), Shc4(0.42), Rom1(0.33), Nr4a2(0.32), Zfp36l1(0.31), Tgfbr1(0.27), Eif4a1(0.26), Ppp2cb(0.26), Tgfb1(0.26), Nras(0.25), Hif1a(0.24), Hif1a(0.24), Gata6(0.23), Zc3h12a(0.21), Cln3(0.2), Plagl1(0.2), Ezh2(0.18), Myc(0.18), Myc(0.18), Myd88(0.18), Tc2n(0.17), Kdm6b(0.17), Tsku(0.16), Atf5(0.15), Tbl1xr1(0.14), Kdm3a(0.14), Rc3h2(0.13), …
retinoid metabolic process	0.17414	0.316044	0.0393914	0.158191	10	0.271544	0.261492	0.300272	0.0610831	0.269516	Bco1(0.6), Bco1(0.6), Adh7(0.18), Cyp2j6(-0.04), Adh1(-0.05), Adh5(-0.09), Aldh1a2(-0.33), Rdh1(-0.38), Dhrs3(-0.59), Rarres2(-1.33),
Rho guanyl-nucleotide exchange factor activity	0.124189	0.120729	0.0397615	0.159497	69	0.0779318	0.559816	0.354706	0.604973	0.00545086	Fgd3(0.41), Arhgef37(0.4), Arhgef28(0.31), Vav1(0.2), Akap13(0.17), Akap13(0.17), Plekhg6(0.16), Als2cl(0.15), Fgd6(0.14), Itsn2(0.13), Arhgef5(0.1), Sos2(0.09), Arhgef25(0.09), Abr(0.07), Bcr(0.07), Arhgef1(0.06), Plekhg2(0.06), Itsn1(0.04), Sos1(0.04), Dock9(0.04), Farp1(0.04), Rgl2(0.03), Arhgef7(0.03), Dnmbp(0.03), Eps8l1(0.02), Plekhg3(0.02), Arhgef2(0.01), Arhgef2(0.01), Arhgef12(0.01), Als…
thiolester hydrolase activity	0.163549	0.275276	0.0404329	0.161823	14	0.185354	0.0465052	0.538438	0.145036	0.356761	Acot2(0.31), Acot5(0.26), Ppt2(0.08), Ufsp2(0), Ufsp2(0), Baat(-0.02), Ufsp1(-0.04), Acot1(-0.17), Aldh6a1(-0.18), Acot6(-0.18), Acnat2(-0.26), Acot4(-0.57), Acnat1(-0.82), Acot3(-0.92),
response to insulin	0.134431	0.157594	0.0408619	0.163252	39	0.106108	0.0121833	0.391683	0.236596	0.725261	Vgf(1.21), Cyp27b1(0.73), Egr1(0.48), Cry2(0.24), Sirt1(0.2), Srsf5(0.18), Grb10(0.17), Eif6(0.16), Cry1(0.14), Ggh(0.09), Inppl1(0.05), Akt2(0.03), Egr2(0.01), Stxbp3(0), Tsc1(0), Rps6kb1(0), Scap(-0.06), Mtor(-0.07), Trpv4(-0.07), Ogt(-0.07), Epm2aip1(-0.09), Cad(-0.11), Sesn2(-0.11), Sesn2(-0.11), Pck1(-0.12), Inpp5k(-0.15), Hadha(-0.19), Scly(-0.2), Irs1(-0.24), Pik3r1(-0.24), Sesn3(-0.25), S…
protein targeting to mitochondrion	0.150177	0.245709	0.0411476	0.163942	16	0.648932	0.048212	0.145672	0.291712	0.158259	Ywhaz(0.17), Tomm34(0.1), Mterf4(0.09), Aip(0.08), Timm8a1(0.03), Fis1(0), Mtx1(-0.02), Mtx2(-0.02), Tomm40(-0.04), Tomm5(-0.04), Dusp18(-0.04), Fbxo7(-0.11), Mfn2(-0.15), Tomm20(-0.24), Bid(-0.37), Ppp2r2b(-0.57),
semaphorin-plexin signaling pathway	0.0755123	0.197901	0.0415865	0.165504	40	0.743142	0.764167	0.046926	0.387032	0.000510844	Sema3a(0.71), Crmp1(0.47), Crmp1(0.47), Plxna2(0.44), Sema4c(0.42), Rac1(0.3), Sema6b(0.22), Arhgdia(0.1), Sema6d(0.09), Sema3e(0.08), Flna(0.08), Flna(0.08), Flna(0.08), Plxnb1(0.03), Plxnb1(0.03), Plxna1(0.02), Sema3c(0.02), Met(-0.03), Met(-0.03), Sema4d(-0.03), Plxnd1(-0.03), Plxnd1(-0.03), Sema4g(-0.04), Sema4b(-0.05), Sema6a(-0.06), Plxnb2(-0.11), Sema3g(-0.18), Nrp1(-0.23), Nrp1(-0.23), Fa…
natural killer cell differentiation	0.159037	0.246043	0.0417304	0.16589	15	0.299287	0.29686	0.189192	0.523993	0.0233002	Tyro3(0.24), Ikzf1(0.19), Mertk(0.04), Tcf3(0.02), Tusc2(0), Tusc2(0), Sp3(-0.01), Hectd1(-0.02), Il11ra1(-0.03), Stat5b(-0.05), Axl(-0.15), Stat5a(-0.23), Id2(-0.4), Id2(-0.4), Il15(-0.43),
regulation of dendrite development	0.153016	0.279909	0.0418864	0.166137	11	0.111708	0.741644	0.0229015	0.189918	0.33646	Ss18l1(0.06), Rapgef4(0.03), Rhoa(0.02), Kalrn(0), Cdc20(-0.13), Prex1(-0.21), Ntrk2(-0.27), Rtn4ip1(-0.33), Cdkl5(-0.34), Camk1d(-0.42), Rab17(-0.45),
phosphatidylinositol 3-kinase regulatory subunit binding	0.195132	0.264752	0.042386	0.16793	11	0.335686	0.329426	0.146731	0.25378	0.101115	Fbxl2(0.21), Cbl(0.02), Dnm2(0.01), Dab2ip(-0.01), Fam83b(-0.04), Pik3r2(-0.1), Ptpn13(-0.15), Pik3r1(-0.24), Esr1(-0.45), Fam83a(-0.56), Pik3ap1(-0.66),
multicellular organism aging	0.188619	0.270882	0.0427271	0.169092	11	0.264948	0.30158	0.0424581	0.333202	0.293287	Ercc1(0.62), Sec63(0.01), Serp1(0), Ndufs6(0), Cisd2(-0.02), Hyal2(-0.11), Wrn(-0.19), Wrn(-0.19), Rnf165(-0.23), Slc1a2(-0.75), Trp63(-0.92),
calmodulin-dependent protein kinase activity	0.156292	0.216194	0.0430229	0.170072	22	0.6117	0.242389	0.0451246	0.492511	0.0435615	Camk2d(0.42), Camk2d(0.42), Mapkapk2(0.29), Mknk2(0.21), Mapkapk3(0.19), Camk2g(0.16), Ptk2b(0.1), Camkk1(0.06), Camkk1(0.06), Camk2b(0), Camk2b(0), Camk1(-0.06), Mknk1(-0.08), Dapk1(-0.1), Camkk2(-0.13), Mapkapk5(-0.33), Mylk3(-0.35), Camk1d(-0.42), Camk4(-0.46), Camk4(-0.46), Camk1g(-1.62), Camk1g(-1.62),
peptide antigen binding	0.0719877	0.288248	0.0437306	0.172677	25	0.114526	0.989492	0.347224	0.0560766	0.00161579	H2-Q10(0.35), H2-Q10(0.35), H2-D1(0.17), H2-D1(0.17), H2-Q4(0.15), H2-Q4(0.15), H2-K1(0.12), H2-K1(0.12), H2-T23(0.12), H2-T23(0.12), Maml1(0.09), H2-M3(0.06), H2-M3(0.06), H2-T22(0.04), H2-Q2(0.03), H2-Q2(0.03), H2-Aa(-0.03), Tap2(-0.09), Tap1(-0.14), H2-Ab1(-0.21), Dhcr24(-0.23), H2-Q7(-0.29), H2-Q7(-0.29), H2-Q8(-0.34), H2-T24(-0.47),
positive regulation of glucose import	0.151725	0.170101	0.0438129	0.172809	29	0.0525829	0.024326	0.444393	0.355299	0.611604	Fgf21(0.43), Irs2(0.33), Erbb3(0.22), Mgea5(0.15), Mif(0.12), Akt1(0.11), Rhoq(0.11), Tert(0.1), Nfe2l2(0.09), Prkci(0.06), Rap1a(0.05), Akt2(0.03), Prkcd(0.02), Adipor2(-0.01), Rasa1(-0.04), Crebl2(-0.08), Insr(-0.11), Sorbs1(-0.11), Capn10(-0.13), Capn10(-0.13), Fam132a(-0.14), Mapk14(-0.17), Prkcz(-0.18), Irs1(-0.24), Gpc3(-0.32), Erbb4(-0.63), Slc1a2(-0.75), Igf1(-0.87), Adipoq(-3.04),
lung development	0.139316	0.116999	0.0439332	0.173091	91	0.325421	0.818733	0.265146	0.0101448	0.0924395	Chil1(1.27), Lif(0.73), Ctgf(0.55), Nos3(0.53), Lox(0.32), Spry2(0.3), Mmp14(0.28), Itga3(0.26), Pdpn(0.2), Pitx2(0.17), Jmjd6(0.17), Ada(0.13), Hspb11(0.13), Bmpr1a(0.11), Fgf7(0.11), Zfpm2(0.09), Ccbe1(0.09), Fgfr2(0.08), Fgfr2(0.08), Sp1(0.08), Smad2(0.07), Bag6(0.07), Vegfa(0.06), Vegfa(0.06), Stk40(0.06), Foxp1(0.06), Ep300(0.06), Dicer1(0.05), Kdr(0.04), Ppp1ca(0.04), Wnt7b(0.04), Foxf1(0.0…
estrogen receptor binding	0.184263	0.144462	0.0446085	0.17555	37	0.111441	0.0866016	0.350684	0.41253	0.269312	Wipi1(0.33), Nkx3-1(0.27), Padi2(0.27), Src(0.22), Rnf4(0.21), Prmt2(0.17), Ddx54(0.15), Ddx5(0.07), Pcna(0.07), Trip4(0.07), Fus(0.07), Strn(0.03), Taf10(0.01), Dnmt1(-0.01), Med1(-0.01), Nsd1(-0.02), Ctnnb1(-0.03), Ncoa2(-0.03), Mms19(-0.03), Ncoa3(-0.06), Ddx17(-0.08), Nrip1(-0.08), Ccdc62(-0.1), Cnot1(-0.11), Pias2(-0.12), Hsd17b10(-0.15), Ncor1(-0.15), Ncoa1(-0.19), Psmc3ip(-0.21), Pik3r1(-0…
negative regulation of peptidyl-tyrosine phosphorylation	0.179007	0.225626	0.0446567	0.17555	17	0.467311	0.217682	0.186586	0.412426	0.0339844	Samsn1(0.51), Sfrp2(0.38), Errfi1(0.27), Il18(0.25), Ptprc(0.24), Pecam1(0.13), Prkcd(0.02), Sema4d(-0.03), Ptpn6(-0.04), Ptpn6(-0.04), Ntf3(-0.07), Lrrk1(-0.1), Spink1(-0.15), Prkcz(-0.18), Sfrp1(-0.67), Dmtn(-0.84), Igf1(-0.87),
nuclear mRNA surveillance	0.178258	0.352697	0.0448574	0.176144	10	0.641699	0.120907	0.078448	0.348202	0.118769	Exosc8(0.14), Exosc10(0.09), Exosc4(0.04), Exosc4(0.04), Dxo(-0.01), Exosc7(-0.03), Xrn1(-0.04), Exosc9(-0.04), Exosc9(-0.04), Exosc5(-0.12),
TORC2 complex	0.133253	0.267559	0.0452162	0.177356	14	0.401822	0.00559126	0.434033	0.598366	0.139323	Prr5l(0.06), Prr5l(0.06), Mlst8(0.05), Rictor(0.03), Rictor(0.03), Pink1(0.02), Tti1(-0.03), Mtor(-0.07), Sesn2(-0.11), Telo2(-0.13), Mapkap1(-0.16), Sesn3(-0.25), Prr5(-0.26), Prr5(-0.26),
neuronal stem cell population maintenance	0.142589	0.223003	0.0457976	0.179239	19	0.0326458	0.264095	0.331119	0.126939	0.610066	Fancc(0.19), Ss18(0.12), Fut10(0.1), Srrt(0.05), Mapk8(0.04), Hes1(0.01), Hes1(0.01), Dll1(-0.03), Foxo1(-0.06), Mcph1(-0.06), Cdh2(-0.12), Foxo3(-0.16), Hook3(-0.17), Wdr62(-0.18), Prox1(-0.27), Igf2bp1(-0.28), Pcm1(-0.3), Aspm(-0.42), Prrx1(-0.45),
mitotic sister chromatid cohesion	0.148654	0.291205	0.0460503	0.179916	16	0.424971	0.0427846	0.236938	0.179987	0.410431	Rad21(0.06), Mau2(0.06), Nipbl(0.05), Wapl(0.04), Smc1a(0.02), Chtf8(0), Smc3(-0.02), Pogz(-0.02), Pds5a(-0.03), Pds5a(-0.03), Pttg1(-0.06), Pds5b(-0.13), Pds5b(-0.13), Cdc20(-0.13), Rec8(-0.39), Gsg2(-0.7),
vacuole	0.161103	0.200082	0.0460724	0.179916	20	0.123121	0.162686	0.153345	0.306837	0.461786	Vmp1(0.48), Ctsl(0.43), Tmem138(0.11), Atp6v0c(0.09), Slc30a2(0.06), Atp6v0b(0.05), Atp6ap1(0.03), Lamp1(-0.02), Nprl2(-0.04), Cd74(-0.05), Man2c1(-0.05), Nprl3(-0.06), Ttc3(-0.12), Glb1(-0.14), Slc22a17(-0.17), Glb1l(-0.18), Slc11a2(-0.24), Glb1l2(-0.48), Cit(-0.69), Mst1r(-0.99),
positive regulation of cell growth involved in cardiac muscle cell development	0.153968	0.296595	0.0462945	0.180584	11	0.344692	0.519925	0.245598	0.041595	0.161031	Edn1(0.76), Ddx39b(0.05), Fdps(0.01), Pin1(-0.01), Mtor(-0.07), Nr3c1(-0.13), Akap6(-0.17), Wisp1(-0.27), Slc25a4(-0.3), Adrb1(-0.57), Igf1(-0.87),
calcium-dependent cell-cell adhesion via plasma membrane cell adhesion molecules	0.146039	0.259659	0.0465669	0.181247	16	0.252599	0.342736	0.320583	0.0971394	0.179012	Cdh1(0.26), Ajuba(0.03), Arvcf(0.02), Pcdhga12(0), Cdh16(-0.03), Cdh16(-0.03), Pcdh18(-0.04), Pcdh1(-0.06), Pcdhgc3(-0.07), Atp2c1(-0.07), Cdh2(-0.12), Cdh2(-0.12), Ceacam1(-0.12), Cdh13(-0.13), Pcdhb16(-0.21), Pcdh12(-0.43),
synapse organization	0.0905058	0.229799	0.0467368	0.181709	25	0.221848	0.917151	0.0383515	0.607325	0.00203248	Klk8(0.31), Wnt7a(0.22), Wnt7a(0.22), Nlgn2(0.17), Elfn1(0.12), Sema3e(0.08), Dvl1(0.05), Dvl1(0.05), Snca(0.05), Rab39b(0.05), Wnt7b(0.04), Myo5a(0), Tsc1(0), Pin1(-0.01), Ctnnb1(-0.03), Dact1(-0.06), Slc9a6(-0.06), Lmx1b(-0.07), Pcdhgc3(-0.07), Lamb2(-0.09), Nptn(-0.1), Ank3(-0.41), Lrp4(-0.49), Atp2b2(-0.62), Sncg(-0.62),
very long-chain fatty acid biosynthetic process	0.161599	0.271401	0.0467982	0.181748	18	0.183152	0.10553	0.124833	0.288496	0.545283	Elovl6(0.16), Hacd1(0.14), Hacd3(0.06), Hacd3(0.06), Hacd2(0.03), Hacd2(0.03), Elovl7(0.02), Elovl7(0.02), Elovl1(-0.01), Elovl1(-0.01), Elovl5(-0.05), Elovl5(-0.05), Tecr(-0.1), Elovl2(-0.27), Elovl2(-0.27), Elovl2(-0.27), Hacd4(-0.63), Hacd4(-0.63),
Leydig cell differentiation	0.163012	0.279201	0.0468496	0.181748	10	0.358626	0.248971	0.420307	0.395733	0.0124576	Sf1(0.15), Sgpl1(0.08), Dhh(0), Dhh(0), Tmf1(0), Map7(-0.1), Plekha1(-0.18), Pdgfra(-0.34), Ccnd1(-0.53), Ar(-0.55),
intraciliary transport particle B	0.100664	0.246997	0.046921	0.181825	22	0.235039	0.378382	0.00421204	0.387586	0.581533	Hspb11(0.13), Hspb11(0.13), Cluap1(0.13), Trim59(0.09), Rabl2(0.09), Ift20(0.07), Ift57(0.05), Ift74(0.04), Ift81(0.02), Ttc30a1(-0.08), Ift88(-0.1), Traf3ip1(-0.1), Ift22(-0.14), Ift46(-0.14), Ift52(-0.14), Ttc30b(-0.15), Ift27(-0.16), Ift27(-0.16), Ttc26(-0.18), Ift80(-0.21), Kif17(-0.46), Ift172(-0.51),
cell morphogenesis	0.158354	0.119217	0.0472862	0.182938	66	0.0944555	0.319617	0.0922029	0.681299	0.135752	Clu(0.67), Il7r(0.56), Adam8(0.42), Klf2(0.38), Egfr(0.23), Pdpn(0.2), Shroom1(0.2), Yap1(0.19), Hgf(0.16), P2rx7(0.16), Cap1(0.15), Col4a3bp(0.15), Capzb(0.14), Ss18(0.12), Ss18(0.12), Shroom3(0.11), Sidt2(0.08), Tbcc(0.07), Ahr(0.06), Cul3(0.06), Sart3(0.06), Stk4(0.06), Ssh1(0.05), Csnk1a1(0.04), Slc39a3(0.04), Wdr19(0.04), Rhoa(0.02), Arhgef2(0.01), Arhgef2(0.01), Tgfb2(0), Unc93b1(0), Med1(-…
DNA clamp loader activity	0.107451	0.35883	0.0473115	0.182938	11	0.453723	0.293825	0.0313836	0.467195	0.127994	Rad17(0.07), Chtf18(0.07), Rfc2(-0.01), Rfc2(-0.01), Rfc1(-0.06), Rfc5(-0.08), Rfc5(-0.08), Rfc3(-0.11), Rfc3(-0.11), Rfc4(-0.22), Rfc4(-0.22),
arachidonic acid secretion	0.193754	0.286596	0.0474195	0.183155	13	0.115778	0.299974	0.0628729	0.435661	0.374018	Nmb(0.51), Bdkrb2(0.5), Proca1(0.3), Anxa1(0.2), Pla2g12a(0.2), Ace(0.14), Pnpla8(0.05), Pla2g4a(-0.08), Pla2g4a(-0.08), Pla2g2e(-0.24), Kiss1r(-0.31), Pla2g5(-1.48), Pla2g5(-1.48),
pancreas development	0.171803	0.215726	0.0480201	0.185071	18	0.0953413	0.163739	0.755833	0.127775	0.161125	Gata6(0.23), Hhex(0.1), Smad2(0.07), Foxf1(0.03), Hes1(0.01), Ctnnb1(-0.03), Eif2ak3(-0.04), Pax2(-0.1), Ift88(-0.1), Gdf11(-0.11), Acvr2b(-0.17), Selt(-0.18), Ihh(-0.19), Ihh(-0.19), Invs(-0.27), Aldh1a2(-0.33), Ildr2(-0.39), Rbm4(-0.42),
oocyte maturation	0.214955	0.223223	0.0482463	0.185522	15	0.219142	0.374091	0.231093	0.189714	0.157151	Ereg(0.71), Insl3(0.19), Rps6ka2(0.11), Ptk2b(0.1), Pde3a(0.03), Trip13(-0.06), Wash1(-0.1), E430025E21Rik(-0.1), Cdc25b(-0.16), Foxo3(-0.16), Brca2(-0.33), Fbxo5(-0.35), Fbxo5(-0.35), Rec8(-0.39), Plcb1(-0.52),
guanyl-nucleotide exchange factor activity	0.183712	0.0889454	0.0482944	0.185522	153	0.165111	0.338681	0.252761	0.556328	0.0358038	Rasgrp4(0.66), Dock4(0.59), Ralgds(0.58), Rasgef1b(0.47), Fgd3(0.41), Psd(0.4), Arhgef37(0.4), Ric8b(0.32), Arhgef28(0.31), Cyth4(0.29), Cyth1(0.23), Cyth2(0.23), Dock5(0.23), Rcc1(0.22), Vav1(0.2), Dennd6b(0.18), Akap13(0.17), Eif2b2(0.16), Eif2b2(0.16), Dennd1c(0.15), Sbf1(0.15), Fgd6(0.14), Tagap(0.13), Ric8a(0.12), Ric8a(0.12), Rinl(0.12), Dennd2c(0.12), Dennd5a(0.11), Rgp1(0.11), Arhgef5(0.1…
retina vasculature morphogenesis in camera-type eye	0.195632	0.315406	0.0484263	0.185827	10	0.297536	0.250417	0.220198	0.220027	0.167459	Clic4(0.32), Rhoj(0.31), Slc4a7(-0.01), Arhgef15(-0.02), Fzd4(-0.13), Fzd4(-0.13), Fzd4(-0.13), Lrp5(-0.14), Lrp5(-0.14), Nrp1(-0.23),
negative regulation of heart contraction	0.150961	0.329189	0.0486046	0.186309	11	0.0651419	0.63449	0.0289944	0.145216	0.660405	Pde4d(0.28), Jak2(0.16), Atp2a2(0.15), Adora1(-0.08), Prkca(-0.14), Prkg1(-0.18), Atp1a1(-0.29), Pln(-0.34), Pln(-0.34), Nos1(-0.56), Atp1a2(-1.4),
regulation of stress fiber assembly	0.204346	0.277513	0.0487154	0.186531	10	0.362315	0.0755531	0.162441	0.482444	0.186804	Alms1(0.12), Rock1(0.06), Bbs4(0.01), Tsc1(0), Mkks(-0.03), Ptger4(-0.04), Pik3r2(-0.1), Asap3(-0.11), Pik3r1(-0.24), Ttc8(-0.42),
hair follicle morphogenesis	0.189112	0.191913	0.0488532	0.186857	25	0.121302	0.599574	0.341336	0.11143	0.123215	Foxq1(0.68), Krt17(0.59), Ctsl(0.43), Runx1(0.28), Gorab(0.15), Cdc42(0.12), Fgf7(0.11), Fgfr2(0.08), Dicer1(0.05), Notch1(0.03), Runx3(0.02), Tgfb2(0), Ctnnb1(-0.03), Bcl2(-0.06), Wnt10a(-0.08), Intu(-0.13), Smo(-0.18), Tmem79(-0.21), Snai1(-0.27), Igfbp5(-0.31), Atp7a(-0.32), Fst(-0.32), Ngfr(-0.83), Trp63(-0.92), Sostdc1(-1.23),
peptide catabolic process	0.0864219	0.242848	0.0492376	0.188124	22	0.0423278	0.021111	0.128627	0.722537	0.726909	Cpe(0.18), Cndp2(0.16), Ace(0.14), Npepps(0.06), 2010111I01Rik(0.06), Rnpepl1(0.06), Cpq(0), Cpq(0), Lnpep(-0.01), Lta4h(-0.02), Lta4h(-0.02), Enpep(-0.03), Erap1(-0.07), Rnpep(-0.12), Mmp13(-0.15), Tpp1(-0.16), Tpp1(-0.16), Acy1(-0.18), Cndp1(-0.2), Pm20d1(-0.24), Anpep(-0.51), Ide(-0.56),
adrenal gland development	0.137586	0.26497	0.0497176	0.189565	17	0.232979	0.6971	0.0843384	0.380506	0.0366845	Apoa1(0.51), Hmga2(0.34), Cited2(0.27), Cdkn1c(0.22), Arid5b(0.19), Wt1(0.08), Wt1(0.08), Ly6e(0.04), Igf1r(-0.05), Nf1(-0.09), Insr(-0.11), Nr3c1(-0.13), Pbx1(-0.27), Pdgfra(-0.34), Pdgfrb(-0.34), Mdk(-0.43), Stra6(-0.51),
mitotic sister chromatid segregation	0.0786303	0.26541	0.0502843	0.191094	22	0.21052	0.035774	0.163094	0.496048	0.470695	Zwint(0.31), Nek2(0.26), Mis12(0.2), Mad2l1(0.17), Dsn1(0.12), Bub3(0.09), Zfp207(0.06), Cenpa(0.05), Ino80(0.04), Cep57(0), Klhl22(0), Zw10(-0.05), Cep57l1(-0.13), Cdca8(-0.17), Nusap1(-0.26), Plk1(-0.34), Knstrn(-0.36), Spag5(-0.5), Spag5(-0.5), Cit(-0.69), Espl1(-0.88), Espl1(-0.88),
lipid binding	0.104229	0.0753433	0.0502851	0.191094	203	0.0411546	0.240256	0.107301	0.570503	0.434252	Sult1e1(1.98), Ptgs2(1.16), Snx10(1.16), Apoh(0.77), Bpifc(0.7), Nr5a2(0.57), Snx20(0.53), Apoa1(0.51), Ncf1(0.48), Cd55(0.44), Dok7(0.39), Alb(0.34), Fes(0.33), Ffar4(0.32), Tecpr1(0.3), Cyth4(0.29), Star(0.28), Pacsin3(0.28), Pacsin3(0.28), Atp5g2(0.26), Tec(0.24), Cyth1(0.23), Cyth2(0.23), Snx1(0.21), Gpihbp1(0.21), Snx18(0.21), Fermt2(0.21), Esyt2(0.19), Trip10(0.19), Nsfl1c(0.19), Snx15(0.18…
mannosyl-oligosaccharide 1,2-alpha-mannosidase activity	0.185241	0.305287	0.050422	0.191409	11	0.438323	0.0579847	0.211759	0.545231	0.104733	Edem1(0.14), Man1b1(0.1), Man1b1(0.1), Man1a(0.01), Man1a2(0.01), Edem2(-0.07), Edem3(-0.1), Edem3(-0.1), Usf3(-0.11), Man1c1(-0.22), Man1c1(-0.22),
tRNA guanylyltransferase activity	0.160228	0.296843	0.0506718	0.191945	10	0.356136	0.0609761	0.224898	0.611538	0.101039	Ctu1(0.15), Thg1l(0.06), Thg1l(0.06), Nudt5(-0.1), Ispd(-0.12), Rev1(-0.16), Prim2(-0.22), Uap1l1(-0.26), Primpol(-0.28), Prim1(-0.64),
positive regulation of excitatory postsynaptic potential	0.15828	0.235012	0.0510311	0.193004	19	0.179097	0.484934	0.402231	0.457122	0.00953954	Stx1a(0.42), Dbn1(0.27), Wnt7a(0.22), Wnt7a(0.22), Rims2(0.21), Shank3(0.19), Nlgn2(0.17), Ptk2b(0.1), Gsk3b(0.08), Dvl1(0.05), Stx1b(0.05), Pten(-0.1), Prkcz(-0.18), Dlg4(-0.29), Reln(-0.36), Reln(-0.36), Shank1(-0.67), Cux2(-0.78), Ngfr(-0.83),
MAP-kinase scaffold activity	0.20288	0.302276	0.0510605	0.193004	10	0.267129	0.161093	0.459506	0.225278	0.117507	Akap13(0.17), Mapk8ip3(0.1), Mapk8ip3(0.1), Spag9(0.04), Ksr1(-0.09), Ksr1(-0.09), Dusp19(-0.14), Mapk8ip1(-0.16), Mapk8ip1(-0.16), Ksr2(-0.7),
positive regulation of Rho protein signal transduction	0.155394	0.249451	0.051151	0.19314	19	0.111939	0.844117	0.0308673	0.15227	0.289934	P2ry10(1), Apoa1(0.51), Gpr4(0.22), Akap13(0.17), Lpar6(0.13), Lpar1(0.11), Lpar1(0.11), F2rl1(0.09), F2rl1(0.09), Lpar2(-0.1), Adgrg1(-0.14), Gpr17(-0.15), Col3a1(-0.18), F2r(-0.19), Mcf2l(-0.21), Arrb1(-0.32), Pdgfrb(-0.34), Robo1(-0.42), Ngfr(-0.83),
myotube differentiation	0.1813	0.299356	0.0512787	0.19321	12	0.0726169	0.112671	0.219648	0.30806	0.615315	Hacd1(0.14), Gsk3b(0.08), Nfatc3(0.05), Stim1(0.03), Ski(-0.01), Ski(-0.01), Ski(-0.01), Met(-0.03), Gpx1(-0.11), Sort1(-0.3), Sort1(-0.3), Cav3(-0.32),
galactose metabolic process	0.148936	0.357059	0.0516909	0.194073	10	0.133325	0.191432	0.0758152	0.477918	0.432816	B4galt1(0.21), Chst1(0.14), Gale(0.08), Galt(0.07), Galt(0.07), Galk1(-0.15), Galk1(-0.15), Galk1(-0.15), Galk2(-0.23), Galm(-0.31),
mitochondrial calcium ion transport	0.143678	0.275563	0.0517039	0.194073	14	0.385912	0.260028	0.0395497	0.571295	0.128809	Ccdc109b(0.29), Slc8b1(0.13), Slc8b1(0.13), Mcu(0.1), Mcu(0.1), Smdt1(0.02), Micu1(-0.05), Stoml2(-0.06), Micu2(-0.06), Micu2(-0.06), Vdac1(-0.13), Slc25a23(-0.27), Mcur1(-0.3), Mcur1(-0.3),
regulation of neurotransmitter secretion	0.161937	0.271415	0.0517271	0.194073	14	0.237127	0.839559	0.0645233	0.213935	0.053981	Ngf(0.25), Ica1(0.16), Syt12(0.1), Snca(0.05), Snca(0.05), Edn3(0.01), Sncaip(0), Fmr1(-0.02), Kcnc3(-0.11), Celsr1(-0.23), Ntrk2(-0.27), Mef2c(-0.29), Park2(-0.42), Sncg(-0.62),
phosphatidylinositol-4-phosphate binding	0.183611	0.227046	0.0524588	0.196401	20	0.311368	0.0388595	0.577513	0.345802	0.1213	Col4a3bp(0.15), Sh3pxd2b(0.14), Osbpl5(0.12), Plekha5(0.12), Golph3(0.08), Plekha8(0.02), Sestd1(0.01), Arfip1(0), Snx3(-0.01), Dab2ip(-0.01), Osbp(-0.01), Arfip2(-0.02), Golph3l(-0.02), Fam21(-0.03), Snx24(-0.09), Lancl2(-0.09), Osbpl8(-0.19), Jph2(-0.2), Plekhf1(-0.39), Mbl1(-0.55),
positive regulation of cytokinesis	0.101782	0.252872	0.0525828	0.196657	24	0.0905746	0.00980865	0.296618	0.701916	0.520705	Kif23(0.36), Spast(0.16), Pkn2(0.11), Cenpv(0.1), Cenpv(0.1), Cul3(0.06), Chmp3(0.06), Gipc1(0.04), Rhoa(0.02), Kif3b(-0.01), Ect2(-0.04), Igf1r(-0.05), Prkce(-0.07), Cdc6(-0.07), Pkp4(-0.1), Cspp1(-0.12), Cspp1(-0.12), Cdc25b(-0.16), Kif20b(-0.18), Map10(-0.23), Map10(-0.23), Racgap1(-0.28), Aurkb(-0.38), Cit(-0.69),
3'-5' exonuclease activity	0.149403	0.258978	0.0527257	0.196879	23	0.691596	0.0472089	0.0409825	0.666984	0.127103	Eri1(0.18), Polg(0.12), Exosc10(0.09), Apex1(0.05), Rad1(0.05), Rad1(0.05), Pold1(0.04), Aplf(0.03), Exd2(0.02), Exd2(0.02), Rexo2(0.01), Mre11a(0), Rad9a(0), Rad9a(0), Rad50(-0.05), Rad50(-0.05), Rev3l(-0.06), Pole(-0.16), Pola1(-0.19), Wrn(-0.19), Wrn(-0.19), Exd1(-0.32), Rad9b(-0.66),
sodium ion import across plasma membrane	0.187595	0.283217	0.0527533	0.196879	10	0.0830047	0.556115	0.195418	0.184135	0.268373	Slc9a4(0.41), Slc9a2(0.08), Slc9a7(0.06), Slc9a6(-0.06), Slc9a1(-0.11), Slc9a1(-0.11), Slc9a3(-0.17), Slc9a3(-0.17), Slc9a5(-0.35), Slc9a9(-0.61),
phosphatidylinositol biosynthetic process	0.175182	0.251782	0.0529807	0.197519	14	0.299467	0.150482	0.611927	0.098132	0.147634	Pip5k1a(0.16), Inppl1(0.05), Impa1(0.04), Pip5k1c(0.03), Pip5k1c(0.03), Cdipt(0.02), Cdipt(0.02), Cds1(0.01), Fgf2(-0.03), Pi4k2a(-0.03), Sh3yl1(-0.13), Plcg2(-0.25), Pip5k1b(-0.34), Slc27a1(-0.5),
negative regulation of glial cell proliferation	0.174424	0.31816	0.0532653	0.198163	10	0.0291386	0.634145	0.108192	0.381562	0.301307	Cdkn2b(0.27), Tert(0.1), Dicer1(0.05), Tspo(0.04), Notch1(0.03), Hes1(0.01), Idh2(-0.23), Sox11(-0.37), Sox11(-0.37), Ptn(-1.43),
startle response	0.189267	0.294843	0.0541308	0.200822	11	0.149314	0.4325	0.409589	0.172052	0.113684	Penk(0.36), Grin2d(0.13), Kcna1(0.11), Kcna1(0.11), Mecp2(0), Kcnh1(-0.03), Nrg1(-0.05), Npas3(-0.13), Park2(-0.42), Fabp7(-0.55), Csmd1(-0.58),
negative regulation of cell-substrate adhesion	0.183808	0.266126	0.0542924	0.201138	11	0.436473	0.469642	0.0394275	0.280968	0.155163	Angpt2(0.46), Gcnt2(0.34), Notch1(0.03), Men1(0.01), Lgals1(-0.09), Fzd4(-0.13), Fzd4(-0.13), Fzd7(-0.25), Fzd7(-0.25), Col1a1(-0.68), Dmtn(-0.84),
oligodendrocyte development	0.196591	0.234198	0.0547627	0.202668	14	0.618899	0.133856	0.277109	0.129549	0.146237	Tgfb1(0.26), Eif2b2(0.16), Eif2b3(0.1), Med12(0.04), Eif2b1(-0.01), Eif2b5(-0.01), Eif2b4(-0.03), Wasf3(-0.03), Myrf(-0.07), Tcf7l2(-0.13), Hdac11(-0.28), Fgfr3(-0.3), Id2(-0.4), Kcnj10(-0.73),
cortical cytoskeleton	0.173897	0.220653	0.055182	0.204006	30	0.33773	0.278457	0.106692	0.492854	0.0965114	Tpm4(0.37), Sele(0.3), Actn1(0.3), Inpp5d(0.29), Tpm3(0.28), Sptb(0.21), Capzb(0.14), Nsmf(0.12), Actb(0.11), Capza1(0.11), Myh9(0.1), Capza2(0.09), Cttn(0.08), Flna(0.08), Nos2(0.03), Mpp1(-0.06), Sptan1(-0.08), Actn4(-0.09), Sptbn1(-0.12), Tmod1(-0.17), Gypc(-0.22), Gypc(-0.22), Ank1(-0.24), Dlg4(-0.29), Epb41(-0.31), Epb41(-0.31), Epb42(-0.62), Dmtn(-0.84), Slc4a1(-1.71), Slc4a1(-1.71),
phospholipid dephosphorylation	0.211897	0.259837	0.0572936	0.211471	11	0.347585	0.162152	0.115074	0.160952	0.515843	Plpp2(0.2), Plpp1(0.08), Plpp3(0.03), Plpp5(0), Plpp5(0), Plppr3(-0.06), Ephx2(-0.13), Plppr1(-0.16), Plppr2(-0.31), Plppr4(-0.36), Plppr4(-0.36),
condensed chromosome	0.157999	0.188354	0.0573206	0.211471	28	0.443468	0.0431651	0.251812	0.229551	0.396897	Sycp3(0.23), Lig4(0.22), Smarca5(0.15), Cdk2(0.12), Banf1(0.11), Hmgb2(0.09), Pes1(0.08), H2afy(0.03), Akap8(0.03), Akap8(0.03), Hmbs(0.02), Champ1(-0.02), Baz1b(-0.04), Ctcf(-0.07), Mlh3(-0.1), Top3b(-0.13), Ncapd2(-0.18), Ncapd2(-0.18), Ncapd3(-0.21), Rpa1(-0.22), Mlh1(-0.29), Mlh1(-0.29), Smc2(-0.3), Smc2(-0.3), Top2a(-0.45), Rad51(-0.51), Mki67(-0.54), Brca1(-0.57),
protein tetramerization	0.206886	0.151183	0.0575498	0.211722	32	0.401568	0.0480122	0.284367	0.249621	0.35793	Trpm6(0.59), Fh1(0.34), Txnrd1(0.3), Cpsf7(0.14), Hmgcr(0.11), Trp53(0.08), Cutc(0.07), Rps19(0.06), Cpsf6(0.04), Ccl5(0.03), Mtmr2(0.03), Sbf2(0.01), Hmgcl(-0.01), Igf1r(-0.05), Me1(-0.06), Uxs1(-0.08), Kcnc3(-0.11), Dhrs4(-0.11), Nudt21(-0.11), Oxa1l(-0.11), Adsl(-0.16), Adsl(-0.16), Asl(-0.18), Cat(-0.19), Cbr2(-0.24), Shmt2(-0.24), Trpm7(-0.25), Ache(-0.29), Trpv5(-0.31), Dnm1(-0.33), Shmt1(-…
amino acid transport	0.110411	0.207248	0.0575682	0.211722	36	0.354123	0.0361894	0.904116	0.0166826	0.298149	Slc6a14(1.36), Slc7a11(0.55), Slc38a2(0.53), Slc43a1(0.42), Slc6a15(0.31), Slc7a6(0.26), Cln3(0.2), Slc6a9(0.19), Myc(0.18), Slc38a1(0.16), Slc7a1(0.15), Slc7a13(0.13), Slc7a5(0.12), Slc36a4(0.09), Pqlc2(0.08), Slc7a3(0.03), Xk(0.03), Slc3a2(0.01), Slc17a5(-0.01), Slc6a19(-0.05), Slc38a7(-0.05), Slc6a20a(-0.06), Slc6a20a(-0.06), Slc38a9(-0.08), Slc38a10(-0.1), Slc7a2(-0.26), Slc7a8(-0.27), Slc7a8…
negative regulation of androgen receptor signaling pathway	0.222385	0.268189	0.0591652	0.217369	10	0.314598	0.384047	0.0886095	0.207321	0.291335	Dab2(0.23), Sirt1(0.2), Hdac1(0.07), Smarca4(-0.02), Pias2(-0.12), Tcf21(-0.16), Heyl(-0.17), Phb(-0.21), Sfrp1(-0.67), Igf1(-0.87),
response to ionizing radiation	0.171002	0.150884	0.0594035	0.218018	43	0.604672	0.0729879	0.102931	0.498679	0.15126	Lig4(0.22), Eya3(0.17), Kat5(0.17), Usp28(0.15), Xrcc3(0.14), Xrcc4(0.14), Clk2(0.11), Mta1(0.1), Mta1(0.1), Bre(0.09), Stk11(0.08), Inip(0.08), Brat1(0.08), Dclre1c(0.04), Uimc1(0.03), Aen(0.03), Topbp1(0.03), Bax(0.01), Bax(0.01), Rfwd2(0.01), Rnf168(0.01), Babam1(-0.02), Brcc3(-0.03), Rfwd3(-0.05), Nek1(-0.06), Nabp2(-0.06), Nhej1(-0.08), Nhej1(-0.08), Nabp1(-0.12), Rad54l(-0.13), Rad54l(-0.13…
cGMP catabolic process	0.163509	0.349543	0.0597438	0.218848	10	0.068194	0.452054	0.128086	0.164496	0.59487	Pde10a(0.31), Pde1b(0.15), Pde2a(0.07), Pde5a(0.05), Pde5a(0.05), Pde1c(-0.02), Pde9a(-0.26), Pde9a(-0.26), Pde9a(-0.26), Pde1a(-0.29),
regulation of ventricular cardiac muscle cell membrane repolarization	0.15464	0.302899	0.0597533	0.218848	14	0.437093	0.748154	0.0197872	0.341628	0.0635825	Gja1(0.23), Gja1(0.23), Wdr1(0.14), Cacna2d1(0.1), Scn5a(0.07), Kcnh2(0.06), Kcnh2(0.06), Gja5(-0.01), Gja5(-0.01), Kcnq1(-0.16), Snta1(-0.3), Cav3(-0.32), Scn1b(-0.33), Scn4b(-1.08),
response to glucose	0.163305	0.149606	0.0600989	0.219886	41	0.162594	0.0828806	0.202032	0.432823	0.45964	Glul(0.58), Egr1(0.48), Ncf2(0.44), Nnat(0.43), Thbs1(0.36), Irs2(0.33), Casp3(0.28), Srebf1(0.18), Eif2b2(0.16), Eif2b3(0.1), Sidt2(0.08), Smad2(0.07), Ep300(0.06), Vamp2(0.05), Eif2b1(-0.01), Eif2b5(-0.01), Eif2b4(-0.03), Casp6(-0.05), Pfkfb2(-0.05), Hnf1b(-0.05), Apoa2(-0.06), Rmi1(-0.11), Sesn2(-0.11), Sesn2(-0.11), Tcf7l2(-0.13), Gpld1(-0.15), Acvr2b(-0.17), Hnf1a(-0.18), Selt(-0.18), Pfkl(-…
white fat cell differentiation	0.189628	0.26988	0.0604299	0.220869	14	0.0457977	0.338726	0.239987	0.137004	0.668102	Wfdc21(0.95), Sirt1(0.2), Tbl1xr1(0.14), Ctbp1(0.07), Ctbp2(0.07), Ncor2(0.05), Fabp4(0.03), Cebpa(-0.18), Prdm16(-0.26), Pparg(-0.32), Pparg(-0.32), Snai2(-0.48), Per2(-0.66), Scd1(-0.74),
action potential	0.206651	0.266294	0.060914	0.222179	11	0.331326	0.602877	0.0915205	0.213386	0.123454	Chrnb4(0.95), Cln3(0.2), Usp53(0.17), Kcnc2(0.16), Gnaq(-0.01), Gna11(-0.06), Chrnb2(-0.2), Chrnb2(-0.2), Kcnb1(-0.58), Cacna1g(-0.78), Chrna4(-1.02),
motor activity	0.179203	0.159476	0.0609848	0.222208	44	0.188081	0.106004	0.066929	0.848904	0.19549	Myo3b(0.3), Myo9b(0.26), Dnah17(0.19), Myo1d(0.14), Dctn2(0.13), Myh14(0.13), Myl6(0.12), Dync1li2(0.12), Dync1i2(0.11), Myh9(0.1), Myo1g(0.1), Myo1b(0.07), Myl6b(0.07), Dynlt3(0.05), Dynll1(0.04), Myo1e(0.03), Dnal4(0.02), Ccdc102a(0.02), Myo5a(0), Myo5a(0), Dctn1(-0.01), Pin1(-0.01), Dynlrb1(-0.02), Dync1h1(-0.04), Myo1c(-0.04), Dync1li1(-0.05), Myo10(-0.07), Myo5b(-0.1), Myo9a(-0.1), Myh10(-0.…
negative regulation of epithelial cell proliferation	0.166783	0.118759	0.0615733	0.224122	61	0.0461354	0.250877	0.178915	0.293333	0.64472	Krt4(0.6), Sav1(0.48), Sox9(0.41), Sfrp2(0.38), Lims2(0.33), Cdkn2b(0.27), Nkx3-1(0.27), Cdh1(0.26), Tgfb1(0.26), Dab2(0.23), Strap(0.14), Cdkn1b(0.13), Lims1(0.13), Tinf2(0.12), Ppard(0.11), Ptch1(0.09), Fgfr2(0.08), Ift57(0.05), Ift74(0.04), Marveld3(0.03), Marveld3(0.03), Runx3(0.02), Apc(0.01), Apc(0.01), Men1(0.01), Cdc73(0.01), Tgfb2(0), Dlg1(-0.01), Dab2ip(-0.01), Atf2(-0.02), Cdk6(-0.03),…
extrinsic component of membrane	0.20363	0.119024	0.0626393	0.2273	73	0.0414918	0.192622	0.441969	0.538354	0.218794	Snx10(1.16), Ncf1(0.48), Gfra1(0.34), Wipi1(0.33), Nmt2(0.26), Msn(0.25), Ezr(0.23), Snx1(0.21), Snx18(0.21), Atg2a(0.21), Anxa1(0.2), Wipi2(0.2), Mitd1(0.17), Wdr45b(0.16), Snx11(0.16), Wdr45(0.13), Micall1(0.12), Nsmaf(0.1), Bcl2l11(0.07), Snx12(0.06), Snx4(0.06), Ehd2(0.05), Nmt1(0.04), Farp1(0.04), Becn1(0.03), Snx7(0.03), Rnf40(0.03), Nbeal1(0.02), Rpl29(0.01), Snx30(0.01), Snx33(0.01), Snx3…
negative regulation of MAPK cascade	0.180451	0.232114	0.0631765	0.22878	19	0.0581002	0.225598	0.46513	0.502534	0.155617	P2rx7(0.16), Psmd10(0.15), Lemd2(0.14), Rnf149(0.12), Dusp16(0.09), Apc(0.01), Apc(0.01), Dusp3(-0.01), Ptpn6(-0.04), Pebp1(-0.04), Igf1r(-0.05), Nf1(-0.09), Nf1(-0.09), Ash1l(-0.1), Cav1(-0.12), Dag1(-0.12), Nf2(-0.12), Nlrp6(-0.13), Cav3(-0.32),
positive regulation of synaptic transmission, GABAergic	0.217185	0.25118	0.0634347	0.229174	12	0.14971	0.413652	0.242533	0.0808109	0.47614	Tac1(1.42), Nlgn2(0.17), Car2(0.15), Hap1(0.08), Oxtr(0.04), Kif5b(0.01), Prkce(-0.07), Adora2a(-0.2), Adora2a(-0.2), Adra1a(-0.33), Erbb4(-0.63), Car7(-1.12),
inositol phosphate phosphatase activity	0.178201	0.211503	0.0634795	0.229174	23	0.444733	0.0659892	0.284137	0.0778612	0.588167	Mtmr14(0.21), Dusp11(0.11), Nt5dc3(0.11), Nt5c(0.1), Ptpdc1(0.09), Ctdspl2(0.08), Phpt1(0.01), Mtmr6(0.01), Mdp1(0), Tns2(0), Sgpp2(-0.01), Minpp1(-0.02), Plpp6(-0.02), Ocrl(-0.05), Sacm1l(-0.06), Nt5m(-0.07), Pxylp1(-0.07), Mtmr7(-0.11), Nt5dc1(-0.11), Fig4(-0.17), Lhpp(-0.2), Epm2a(-0.24), Sgpp1(-0.26),
RNA polymerase II transcription factor activity, ligand-activated sequence-specific DNA binding	0.185596	0.155828	0.0637915	0.229745	37	0.178834	0.161889	0.141835	0.48976	0.343554	Nr4a1(0.77), Nr5a2(0.57), Nr5a2(0.57), Nr4a2(0.32), Nr4a3(0.27), Rxrb(0.17), Nr1h2(0.16), Rora(0.15), Ppard(0.11), Ppard(0.11), Stat3(0.11), Rorb(0.09), Glmp(0.07), Ahr(0.06), Ahr(0.06), Nr6a1(0.05), Rxra(0.01), Rxra(0.01), Rara(-0.06), Nr1h3(-0.07), Nr1h4(-0.13), Nr2f2(-0.15), Nr2f6(-0.15), Nr2f1(-0.18), Thra(-0.21), Rorc(-0.24), Ppara(-0.32), Pparg(-0.32), Pparg(-0.32), Hnf4g(-0.33), Esrrg(-0.3…
phosphorylase kinase regulator activity	0.20693	0.22808	0.0638283	0.229745	14	0.399015	0.218145	0.26398	0.400533	0.0682458	Hk3(0.33), Hk2(0.22), Uckl1(0.18), Pomk(0.09), Ikbkap(0.03), Nol9(-0.01), Fam20b(-0.01), Prkag2(-0.11), Hk1(-0.13), Fggy(-0.13), Elp3(-0.16), Elp4(-0.28), Fn3krp(-0.35), Fn3k(-0.82),
cullin-RING ubiquitin ligase complex	0.198747	0.284771	0.0638324	0.229745	12	0.399333	0.0470922	0.279151	0.144085	0.567472	Cul1(0.09), Cul3(0.06), Glmn(0.06), Ddb1(0.01), Rbx1(0.01), Cul4b(0.01), Cand1(-0.01), Cul2(-0.04), Cul5(-0.06), Cul4a(-0.07), Cul7(-0.15), Cul9(-0.32),
caveola	0.175319	0.121197	0.0640409	0.230125	88	0.28026	0.66589	0.0233201	0.382105	0.168613	Ptgs2(1.16), Hmox1(0.61), Drd1(0.57), Adrb2(0.54), Nos3(0.53), Slc2a3(0.5), Sele(0.3), Tgfbr1(0.27), Grk2(0.26), Slc2a1(0.25), Prkcdbp(0.25), Prkcdbp(0.25), Atp1b3(0.23), Src(0.22), Src(0.22), Flot2(0.21), Flot2(0.21), Cln3(0.2), P2ry12(0.2), Pld2(0.18), Hck(0.16), Jak2(0.16), Flot1(0.15), Flot1(0.15), Ctsb(0.14), Bmpr1a(0.11), Bmpr2(0.09), Lrp8(0.09), Ptch1(0.09), Scn5a(0.07), Hdac6(0.06), Scarb…
induction of positive chemotaxis	0.190425	0.260088	0.0641315	0.230125	15	0.110475	0.289054	0.11814	0.142866	0.735978	Pgf(1.53), Il16(0.5), Ager(0.28), Vegfc(0.19), Vegfc(0.19), Vegfa(0.06), Ccl21a(0.03), Hmgb1(0.01), Artn(-0.06), Ntf3(-0.07), Prkca(-0.14), Vegfb(-0.15), Vegfd(-0.8), Vegfd(-0.8), Cxcl12(-0.81),
keratin filament	0.112219	0.272828	0.0641599	0.230125	18	0.18991	0.973829	0.0128979	0.14316	0.121585	Krt4(0.6), Krt4(0.6), Krt18(0.21), Krt18(0.21), Fam83h(0.18), Krt8(0.07), Csnk1a1(0.04), Krt7(0.04), Fbf1(0.04), Krt10(-0.09), Krt80(-0.11), Tchp(-0.18), Tchp(-0.18), Krt14(-0.45), Krt14(-0.45), Gper1(-0.56), Krt5(-0.7), Krt5(-0.7),
double-strand break repair via homologous recombination	0.0986344	0.148117	0.0641984	0.230125	68	0.559025	0.00146421	0.561125	0.134314	0.647738	H2afx(0.28), Ap5s1(0.22), Xrcc2(0.19), Xrcc2(0.19), Smc5(0.18), Sfr1(0.16), Sfr1(0.16), Rad52(0.15), Rnf138(0.14), Psmd14(0.14), Wdr48(0.14), Nsmce2(0.14), Xrcc3(0.14), Oraov1(0.12), Spidr(0.12), Rpa2(0.11), Shfm1(0.11), Rbbp8(0.11), Swsap1(0.09), Yy1(0.08), Smc6(0.08), Morf4l1(0.05), Zswim7(0.05), Ino80(0.04), Nucks1(0.04), Sfpq(0.02), Exd2(0.02), Zfyve26(0.02), Mcm8(-0.02), Swi5(-0.02), Swi5(-0…
synaptic vesicle exocytosis	0.150722	0.32148	0.0642848	0.230202	10	0.115403	0.485679	0.133302	0.0227045	0.828347	P2rx7(0.16), Stx4a(0.07), Vamp2(0.05), Snapin(-0.02), Cadps2(-0.14), Rab3a(-0.15), Rab3a(-0.15), Cplx2(-0.16), Adgrl1(-0.16), Sptbn2(-0.44),
tRNA splicing, via endonucleolytic cleavage and ligation	0.227533	0.247539	0.0647644	0.231559	12	0.330652	0.198825	0.266573	0.167278	0.302345	Clp1(0.3), Clp1(0.3), Tsen15(0.1), 2700060E02Rik(0), Rtcb(-0.01), Ddx1(-0.05), Tsen34(-0.06), Tsen2(-0.08), Tsen54(-0.14), Zbtb8os(-0.18), Zbtb8os(-0.18), Trpt1(-0.35),
protein heterotetramerization	0.185938	0.216151	0.0647948	0.231559	17	0.264405	0.0459802	0.0672061	0.585302	0.582058	S100a10(0.26), Nup54(0.17), Nupl1(0.1), Anxa2(0.08), Farsa(0.03), Hist1h4h(0.03), Farsb(-0.03), Insr(-0.11), Pdss1(-0.12), Rrm1(-0.2), Xrcc6(-0.21), Pdss2(-0.22), Rrm2(-0.23), Hist1h4i(-0.36), Agrn(-0.4), Aldoc(-0.43), Lrp4(-0.49),
reverse cholesterol transport	0.150835	0.266845	0.0652404	0.232917	16	0.0668503	0.127788	0.20292	0.770706	0.256312	Apoa1(0.51), Apoa1(0.51), Lcat(0.37), Abcg1(0.15), Scarb1(0.06), Abca5(0.01), Apoe(-0.01), Apoe(-0.01), Apoa2(-0.06), Abca1(-0.11), Abca1(-0.11), Hnf1a(-0.18), Apom(-0.24), Apoa4(-0.33), Apoa4(-0.33), Lipg(-0.43),
DNA replication	0.0744024	0.127665	0.0653884	0.23321	117	0.832595	0.127569	0.184818	0.155959	0.0973233	Dbf4(0.34), Mcm10(0.3), Kin(0.26), Kin(0.26), Pold4(0.26), Rbms1(0.24), Kctd13(0.23), Lig4(0.22), Tnfaip1(0.2), Pola2(0.19), Pola2(0.19), Tbrg1(0.19), Tbrg1(0.19), Rbbp6(0.18), Pold3(0.17), Ing5(0.16), Cinp(0.16), Kat7(0.15), Dnajc2(0.14), Lrwd1(0.14), Orc2(0.13), Top1(0.13), Wrnip1(0.13), Chaf1b(0.13), Polg(0.12), Cdc45(0.11), Rpa2(0.11), Ing4(0.11), Fam111a(0.11), Pcna(0.07), Polb(0.07), Nasp(0…
positive regulation of protein tyrosine kinase activity	0.0878818	0.268971	0.0655506	0.233326	20	0.202397	0.188643	0.9823	0.03064	0.0292299	Hsph1(0.79), Gprc5b(0.44), Dok7(0.39), Dok7(0.39), Pdgfb(0.25), Erbb3(0.22), Ace(0.14), Ptpn1(0.14), Lrp8(0.09), Dvl2(0.07), Unc119(-0.07), Grem1(-0.18), Csf1r(-0.2), Srcin1(-0.32), Reln(-0.36), Reln(-0.36), Agrn(-0.4), Agt(-0.42), Egf(-0.47), Gas6(-0.53),
Golgi cisterna	0.211948	0.227984	0.065553	0.233326	14	0.324181	0.103567	0.402931	0.342497	0.156975	Acpp(0.45), Ggta1(0.09), Golph3(0.08), Golga5(0.05), Golga5(0.05), Furin(0.02), Stx16(-0.05), Bet1(-0.07), Rab34(-0.07), Rab30(-0.12), Sorl1(-0.27), Pld1(-0.31), Gcnt1(-0.63), Cit(-0.69),
retina morphogenesis in camera-type eye	0.232714	0.265339	0.0657725	0.233873	10	0.127114	0.421659	0.17567	0.302067	0.27967	Rom1(0.33), Rpgr(0.06), Man2a1(-0.01), Dll1(-0.03), Lrp6(-0.05), Nectin3(-0.1), Lrp5(-0.14), Prom1(-0.22), Crb2(-0.53), Bhlhe22(-0.67),
axolemma	0.22761	0.218395	0.0658513	0.233917	15	0.156949	0.478185	0.155198	0.395622	0.151546	Gabbr1(0.18), Kcnc2(0.16), Myo1d(0.14), Mapk8ip3(0.1), Kcnh1(-0.03), Nrg1(-0.05), Adora1(-0.08), Kcnc3(-0.11), Sptbn1(-0.12), Robo2(-0.13), Adora2a(-0.2), Ank1(-0.24), Robo1(-0.42), Epb41l3(-0.58), Slc1a2(-0.75),
centriole	0.0841202	0.138494	0.0661628	0.234499	102	0.191762	0.030908	0.0123564	0.734563	0.839635	Hspa1a(1.78), Plk4(0.52), Ccnf(0.45), Plk2(0.42), Mdm1(0.35), Mdm1(0.35), Nedd1(0.32), Cep170(0.27), Sass6(0.26), Sass6(0.26), Ttbk2(0.23), Ttbk2(0.23), Cep192(0.22), Odf2(0.21), Odf2(0.21), Cep78(0.21), Ahi1(0.19), Stil(0.16), Ran(0.15), Cep83(0.15), Cep83(0.15), Ccp110(0.14), Cep120(0.13), Poc1b(0.13), Alms1(0.12), Alms1(0.12), Cep76(0.11), Hap1(0.08), Topors(0.08), Ofd1(0.08), Ofd1(0.08), Ift2…
regulation of neuron apoptotic process	0.154581	0.201654	0.0662028	0.234499	24	0.806945	0.0630626	0.224382	0.038823	0.428687	Pcsk9(0.22), Nae1(0.2), Nsmf(0.12), Akt1s1(0.11), Egln2(0.11), Npm1(0.09), Trp53(0.08), Sigmar1(0.06), G6pdx(0.05), Pink1(0.02), Bax(0.01), Park7(0.01), Ntf3(-0.07), Bdnf(-0.09), Gpx1(-0.11), Trim2(-0.21), Trim2(-0.21), Gata3(-0.26), Mef2c(-0.29), Gabrb3(-0.32), Egln3(-0.4), Esr1(-0.45), Kcnip3(-0.47), Trp63(-0.92),
bile acid biosynthetic process	0.151751	0.340443	0.0671742	0.237425	10	0.0751377	0.225928	0.468024	0.0423865	0.741179	Star(0.28), Baat(-0.02), Cyp7b1(-0.06), Cyp39a1(-0.07), Cyp39a1(-0.07), Pex2(-0.09), Slc27a2(-0.1), Hnf1a(-0.18), Akr1d1(-0.2), Amacr(-0.23),
cholesterol biosynthetic process	0.140202	0.191561	0.0673607	0.237717	30	0.548629	0.277491	0.0653725	0.0120674	0.813182	Apoa1(0.51), Tm7sf2(0.23), Pmvk(0.15), Pmvk(0.15), Ebp(0.12), Hmgcr(0.11), Hmgcr(0.11), Cyb5r3(0.11), Fdft1(0.1), Insig1(0.09), G6pdx(0.05), Prkaa1(0.02), Cyp51(0.01), Fdps(0.01), Insig2(0), Apoe(-0.01), Hsd17b7(-0.05), Prkaa2(-0.17), Mvk(-0.2), Lss(-0.23), Dhcr24(-0.23), Dhcr24(-0.23), Nsdhl(-0.3), Apoa4(-0.33), Cftr(-0.35), Dhcr7(-0.35), Dhcr7(-0.35), Mvd(-0.37), Hmgcs1(-0.44), Hmgcs2(-1.26),
axonal growth cone	0.217121	0.159145	0.0674386	0.237717	28	0.189288	0.416916	0.091141	0.471732	0.19815	Trpv2(0.62), Dbn1(0.27), Cobl(0.15), Ptch1(0.09), Limk1(0.08), Shtn1(0.06), Shtn1(0.06), Nin(0.04), Fkbp4(0.02), Apc(0.01), Apc(0.01), Kif5b(0.01), Pard3(-0.01), Pard6a(-0.03), Palld(-0.03), Rtn4r(-0.07), Flrt3(-0.13), Mapk8ip1(-0.16), Smo(-0.18), Tiam1(-0.21), Aatk(-0.29), Mapt(-0.3), L1cam(-0.33), Boc(-0.34), Olfm1(-0.35), Gpm6a(-0.35), Agrn(-0.4), Epha4(-0.5),
positive regulation of type I interferon-mediated signaling pathway	0.12589	0.340107	0.0675059	0.237717	11	0.241087	0.648802	0.0600972	0.361823	0.132678	Lsm14a(0.08), Ube2k(0.02), Irf3(-0.01), Fadd(-0.03), Mavs(-0.08), Trim6(-0.13), Trim6(-0.13), Zbp1(-0.26), Wnt5a(-0.27), Irf7(-0.29), Nlrc5(-0.6),
phosphoric diester hydrolase activity	0.175755	0.146011	0.0677068	0.238031	42	0.0748621	0.652263	0.0761811	0.09686	0.670505	Pde10a(0.31), Pde3b(0.28), Pde4d(0.28), Plcd1(0.22), Pde6a(0.19), Pde1b(0.15), Plcxd1(0.12), Pde7a(0.11), Plcg1(0.09), Plce1(0.07), Pde2a(0.07), Apex1(0.05), Pde5a(0.05), Pde8b(0.04), Plcl2(0.04), Pde8a(0.03), Pde3a(0.03), Smpdl3a(0.02), Tdp2(0.01), Gde1(0.01), Plcb3(0), Gpcpd1(0), Pde1c(-0.02), Plcd3(-0.02), Plcl1(-0.15), Plch1(-0.16), Enpp6(-0.16), Plcb2(-0.17), Gdpd5(-0.17), Gdpd1(-0.18), Gdpd…
membrane depolarization during action potential	0.200752	0.275784	0.0681029	0.239036	12	0.599056	0.418959	0.0948991	0.221159	0.0970096	Cacna1a(0.49), Ywhah(0.25), Ywhah(0.25), Tpcn2(0.16), Scn5a(0.07), Kcnh2(0.06), Cacna1c(-0.07), Catsper2(-0.35), Tpcn1(-0.42), Cacna1h(-0.45), Scn7a(-0.64), Catsper4(-0.68),
protein kinase C activity	0.196763	0.216038	0.0683534	0.239677	18	0.456631	0.0888699	0.176889	0.293881	0.343988	Prkch(0.17), Pkn2(0.11), Prkd3(0.09), Prkci(0.06), Prkci(0.06), Prkcd(0.02), Prkd2(-0.02), Prkce(-0.07), Prkcg(-0.11), Prkca(-0.14), Prkca(-0.14), Prkcz(-0.18), Pkn1(-0.18), Prkcq(-0.2), Prkd1(-0.21), Pkn3(-0.3), Prkcb(-0.36), Prkcb(-0.36),
JUN kinase phosphatase activity	0.165626	0.215674	0.0699856	0.24441	22	0.516783	0.0520833	0.331942	0.0593191	0.609402	Mtmr14(0.21), Dusp11(0.11), Nt5dc3(0.11), Nt5c(0.1), Ptpdc1(0.09), Ctdspl2(0.08), Phpt1(0.01), Mtmr6(0.01), Mdp1(0), Tns2(0), Sgpp2(-0.01), Plpp6(-0.02), Sacm1l(-0.06), Nt5m(-0.07), Pxylp1(-0.07), Mtmr7(-0.11), Nt5dc1(-0.11), Dusp19(-0.14), Fig4(-0.17), Lhpp(-0.2), Epm2a(-0.24), Sgpp1(-0.26),
neuron fate commitment	0.154748	0.258105	0.0700873	0.24441	15	0.434918	0.46429	0.706121	0.0231819	0.0553518	Runx1(0.28), Tgfbr1(0.27), Smad4(0.13), Notch1(0.03), E130012A19Rik(0.03), E130012A19Rik(0.03), Tgfb2(0), Gli3(-0.03), Nrg1(-0.05), Gata2(-0.13), Bmp4(-0.15), Bmp4(-0.15), Zfp521(-0.26), Notch3(-0.33), Id2(-0.4),
dorsal/ventral neural tube patterning	0.191569	0.235837	0.0701176	0.24441	18	0.164266	0.233774	0.184912	0.738605	0.0906583	Psen1(0.18), Kif3a(0.14), Kif3a(0.14), Ptch1(0.09), Tulp3(0.09), Tctn1(0.08), Psen2(0.03), Rab23(-0.04), Fkbp8(-0.06), Fkbp8(-0.06), Fkbp8(-0.06), Bmp4(-0.15), Smo(-0.18), Gas1(-0.24), Gas1(-0.24), Foxa1(-0.28), Gli2(-0.47), Gli2(-0.47),
mitochondrial respiratory chain complex III assembly	0.214311	0.273438	0.0704932	0.245477	10	0.176466	0.10315	0.404406	0.159076	0.55613	Slc25a33(0.45), Ttc19(0.07), Ttc19(0.07), Uqcc2(0.03), Uqcc3(0.02), Uqcr10(-0.05), Uqcrb(-0.07), Uqcc1(-0.14), Bcs1l(-0.35), Bcs1l(-0.35),
phosphatidylinositol-5-phosphate binding	0.20798	0.27397	0.0706012	0.245612	10	0.12585	0.283357	0.225822	0.646287	0.116337	Sh3pxd2b(0.14), Plekha5(0.12), Sestd1(0.01), Snx3(-0.01), Fam21(-0.03), Snx24(-0.09), Lancl2(-0.09), Jph2(-0.2), Phlda3(-0.24), Plekhf1(-0.39),
membrane-bounded vesicle	0.156256	0.211681	0.0710235	0.246605	21	0.0498711	0.295249	0.54539	0.0563222	0.645648	Spp1(0.53), Ywhag(0.36), Bglap3(0.22), Bmp6(0.14), Bmp2(0.11), Vegfa(0.06), Sparc(0.03), Ccz1(-0.01), Ggt1(-0.05), Slc34a1(-0.07), Bmp7(-0.09), Mttp(-0.13), Bmp4(-0.15), Slc9a3(-0.17), Bmp3(-0.25), Bmp1(-0.26), Syt8(-0.31), Slc26a6(-0.31), Slc47a1(-0.35), Slc47a1(-0.35), Tbc1d4(-0.44),
dendrite development	0.210967	0.165073	0.0710263	0.246605	31	0.136711	0.318664	0.685907	0.231325	0.0713086	Pak3(0.85), Rac1(0.3), Trappc4(0.24), Map1b(0.22), Ppp1r9b(0.13), Pak1(0.1), Scarf1(0.09), Ss18l1(0.06), Hdac2(0.05), Strn(0.03), Dab1(0.01), Dab1(0.01), Bbs4(0.01), App(0), App(0), Mecp2(0), Grip1(-0.01), Abi2(-0.05), Bdnf(-0.09), Prkg1(-0.18), Syngap1(-0.21), Map2(-0.23), Nrp1(-0.23), Myo6(-0.25), Bbs1(-0.26), Baiap2(-0.33), Reln(-0.36), Reln(-0.36), Igsf9(-0.67), Cit(-0.69), Flrt1(-0.9),
skeletal muscle tissue development	0.198973	0.146504	0.0714246	0.247745	39	0.272876	0.631432	0.0311071	0.329895	0.241038	Cflar(0.27), Tgfb1(0.26), Pitx2(0.17), Flnb(0.17), Cfl2(0.16), Myh14(0.13), Hlx(0.12), Myl6(0.12), Psma6(0.12), Myl6b(0.07), Nphs1(0.06), Foxp1(0.06), Ep300(0.06), Srpk3(0.04), Meg3(0.03), Rhoa(0.02), Gpcpd1(0), Taz(-0.01), Svil(-0.01), Met(-0.03), Ccnt2(-0.03), Zbtb18(-0.07), Mbnl1(-0.08), Hoxd9(-0.09), Nf1(-0.09), Vamp5(-0.09), Cav1(-0.12), Nr2f2(-0.15), Cdk5(-0.17), Mapk14(-0.17), Hoxd10(-0.26…
retina layer formation	0.203283	0.251225	0.0726954	0.251317	13	0.0391741	0.295628	0.508199	0.140698	0.539143	Hipk1(0.18), Fjx1(0.16), Ptprm(0.03), Hipk2(-0.01), Rdh13(-0.03), Tspan12(-0.04), Lhx1(-0.14), Lhx1(-0.14), Sdk2(-0.17), Arl6(-0.21), Megf11(-0.21), Prom1(-0.22), Calb1(-0.56),
endosomal transport	0.168498	0.175257	0.0727875	0.251317	40	0.391653	0.00670053	0.424353	0.724752	0.180741	Rab10(0.27), Was(0.27), Ap5s1(0.22), Snx18(0.21), Rab35(0.18), Agap2(0.16), Cdc42(0.12), Vps4a(0.12), Alms1(0.12), Bloc1s5(0.11), Vps4b(0.11), Rab13(0.08), Bloc1s3(0.08), Vps16(0.06), Als2(0.01), Snx33(0.01), Vps36(-0.01), Picalm(-0.01), Ehd1(-0.02), Snx9(-0.03), Bloc1s1(-0.04), Htt(-0.06), Snx27(-0.07), Snx27(-0.07), Dpy30(-0.08), Mcoln1(-0.08), Zfyve16(-0.09), Nsg1(-0.1), Wash1(-0.1), E430025E2…
methionine biosynthetic process	0.218718	0.253808	0.0728094	0.251317	12	0.570546	0.120908	0.130665	0.231052	0.343641	Mthfd2l(0.2), Mri1(0.09), Mtr(0.03), Mtr(0.03), Enoph1(-0.01), Adi1(-0.04), Mtrr(-0.09), Mtrr(-0.09), Apip(-0.13), Mthfr(-0.29), Bhmt2(-0.32), Mthfd1(-0.46),
transcription from mitochondrial promoter	0.189568	0.281006	0.0729701	0.251626	11	0.696847	0.0276598	0.446638	0.14648	0.253192	Slc25a33(0.45), Mterf4(0.09), Mterf3(0.07), Tfb2m(0.03), Tfb2m(0.03), Tfam(-0.06), Tefm(-0.13), Peo1(-0.15), Polrmt(-0.17), Mrpl12(-0.2), Ppargc1b(-0.3),
detection of mechanical stimulus	0.228541	0.258979	0.0737963	0.254098	11	0.0899437	0.161837	0.45816	0.290234	0.400438	Pkd1l3(0.22), Dennd5a(0.11), Pkd2(0.05), Pkd1(0), Pkd1(0), Dennd5b(-0.02), Piezo1(-0.06), Jup(-0.07), Pkd2l2(-0.13), Pkdrej(-0.72), Ano3(-1.21),
embryonic skeletal joint morphogenesis	0.164148	0.272012	0.0738305	0.254098	12	0.298661	0.272615	0.836883	0.132868	0.0242428	Nog(0.78), Axin1(0.13), Hyal1(-0.02), Hoxd11(-0.03), Hoxa11(-0.04), Bmp7(-0.09), Bmp7(-0.09), Osr2(-0.11), Bmp4(-0.15), Bmp4(-0.15), Osr1(-0.42), Hoxc11(-0.77),
negative regulation of neuron projection development	0.231316	0.131301	0.0746029	0.256257	59	0.233294	0.537294	0.144993	0.367445	0.116244	Crmp1(0.47), Rtn4(0.35), Map4k4(0.34), Pmp22(0.28), Dab2(0.23), H2-D1(0.17), H2-D1(0.17), H2-D1(0.17), Paqr3(0.13), Dleu2(0.13), H2-K1(0.12), H2-K1(0.12), Vim(0.12), Lpar1(0.11), Lpar1(0.11), Lpar1(0.11), Mdm2(0.1), Gsk3b(0.08), Gsk3b(0.08), Flna(0.08), Pafah1b1(0.07), Prkcsh(0.06), Bag5(0.06), Hdac2(0.05), Hdac2(0.05), Inppl1(0.05), B2m(0.04), Rbpj(0.04), Dguok(0.04), Itm2c(0.03), Rhoa(0.02), Ka…
lipoprotein metabolic process	0.166017	0.221151	0.0748449	0.256839	19	0.144211	0.106445	0.104299	0.369194	0.7509	Apoa1(0.51), Lcat(0.37), Olr1(0.26), Pcsk9(0.22), Apob(0.11), Apob(0.11), Apoe(-0.01), Apoe(-0.01), Apoe(-0.01), Apoa2(-0.06), Apobec1(-0.08), Abca1(-0.11), Mttp(-0.13), Mttp(-0.13), Ldlr(-0.14), Apom(-0.24), Ppara(-0.32), Apoa4(-0.33), Apoc3(-0.39),
phosphatidylinositol-4-phosphate phosphatase activity	0.176096	0.218873	0.0749397	0.256915	22	0.495948	0.0520833	0.3511	0.0694215	0.609402	Mtmr14(0.21), Dusp11(0.11), Nt5dc3(0.11), Nt5c(0.1), Ptpdc1(0.09), Ctdspl2(0.08), Phpt1(0.01), Mtmr6(0.01), Mdp1(0), Tns2(0), Synj1(-0.01), Sgpp2(-0.01), Plpp6(-0.02), Sacm1l(-0.06), Nt5m(-0.07), Pxylp1(-0.07), Mtmr7(-0.11), Nt5dc1(-0.11), Fig4(-0.17), Lhpp(-0.2), Epm2a(-0.24), Sgpp1(-0.26),
phospholipase A2 activity	0.21013	0.270416	0.0755804	0.258361	11	0.144921	0.0830768	0.17614	0.668952	0.39225	Lcat(0.37), Proca1(0.3), Pla2g12a(0.2), Pla2g6(0.05), Abhd3(-0.05), Pla2g4a(-0.08), Pla2g4a(-0.08), Pla2g2e(-0.24), Pla2g16(-0.28), Pla2g16(-0.28), Pla2g5(-1.48),
endochondral ossification	0.193304	0.204005	0.076419	0.260975	23	0.292449	0.254025	0.448102	0.319749	0.082317	Csgalnact1(0.54), Col13a1(0.41), Mmp14(0.28), Nab1(0.17), Bmp6(0.14), Mef2d(0.12), Impad1(0.11), Inppl1(0.05), Gnas(0.03), Runx2(0), Nab2(0), Cbs(-0.02), Sik3(-0.02), Fgf18(-0.11), Bmp4(-0.15), Mmp13(-0.15), Pex7(-0.15), Hspg2(-0.24), Mef2c(-0.29), Mef2c(-0.29), Scx(-0.4), Alpl(-0.48), Col1a1(-0.68),
anterior/posterior axis specification	0.211077	0.232781	0.077231	0.263371	14	0.172817	0.53699	0.109257	0.451002	0.163497	Lefty1(0.19), Rnf2(0.14), Ldb1(0.13), Hey1(0.04), Hey2(0), Ski(-0.01), Ctnnb1(-0.03), Pgap1(-0.13), Pgap1(-0.13), Lhx1(-0.14), Bmp4(-0.15), Wls(-0.23), Gpc3(-0.32), Aurka(-0.39),
integrator complex	0.209446	0.268876	0.0772845	0.263371	14	0.226578	0.04608	0.248961	0.570477	0.401771	Shfm1(0.11), Ints9(0.08), Ints8(0.05), Ints5(0.05), Ints6(0.03), Ints12(0.01), Ints7(-0.02), Ints10(-0.06), Ints4(-0.07), Ints4(-0.07), Cpsf3l(-0.08), Ints1(-0.11), Ints3(-0.13), Ints2(-0.31),
positive regulation of extrinsic apoptotic signaling pathway	0.205949	0.140445	0.0773437	0.263371	37	0.487572	0.264474	0.0209756	0.431397	0.376492	Tnfrsf12a(0.4), Bcl10(0.32), Bcl10(0.32), Dedd2(0.3), Ptprc(0.24), Pak2(0.19), Casp8(0.16), Pml(0.13), Ltbr(0.12), Ripk1(0.09), Ripk1(0.09), Tnfsf12(0.09), Pdia3(0.07), Itm2c(0.03), Runx3(0.02), Traf2(-0.01), Fadd(-0.03), Fadd(-0.03), Cyld(-0.04), Cyld(-0.04), Pidd1(-0.05), Pycard(-0.08), Hyal2(-0.11), Hyal2(-0.11), Cav1(-0.12), Rbck1(-0.14), Wwox(-0.21), Fas(-0.27), G0s2(-0.31), G0s2(-0.31), Bid…
signal transduction in response to DNA damage	0.236437	0.247579	0.0774646	0.263529	12	0.34282	0.12759	0.274739	0.222974	0.390864	Grb2(0.19), Gadd45a(0.18), Abl1(0.05), Abl1(0.05), Smc1a(0.02), Nbn(-0.03), Casp9(-0.15), Pgap2(-0.16), Mapk14(-0.17), Chek2(-0.24), Chek2(-0.24), Bid(-0.37),
actin filament capping	0.171405	0.248925	0.07786	0.264619	16	0.0242074	0.678575	0.089207	0.386699	0.487725	Sptb(0.21), Capzb(0.14), Capza1(0.11), Capza2(0.09), Capg(0.06), Vill(0), Tpm1(-0.03), Sptan1(-0.08), Gsn(-0.09), Gsn(-0.09), Rdx(-0.1), Sptbn1(-0.12), Scin(-0.27), Avil(-0.44), Vil1(-0.46), Dmtn(-0.84),
negative regulation of keratinocyte proliferation	0.238762	0.228721	0.0780482	0.265004	13	0.1761	0.351752	0.269821	0.256143	0.276956	Ctsl(0.43), Sfn(0.26), Cask(0.09), Med1(-0.01), Efnb2(-0.06), Klf9(-0.08), Kdf1(-0.09), Kdf1(-0.09), Intu(-0.13), Cd109(-0.21), Ptprk(-0.24), Snai2(-0.48), Vdr(-0.57),
bone morphogenesis	0.173797	0.209547	0.0785399	0.266418	21	0.0364705	0.840056	0.434237	0.204967	0.0844374	Sfrp2(0.38), Cited2(0.27), Tfap2a(0.18), Fgfr2(0.08), Rarg(0.04), Rarg(0.04), Ski(-0.01), Chsy1(-0.01), Sp5(-0.02), Lrp6(-0.05), Glg1(-0.07), Acp5(-0.09), Osr2(-0.11), Lrp5(-0.14), Mmp13(-0.15), Has2(-0.18), Ltbp3(-0.18), Ift80(-0.21), Fgfr3(-0.3), Cyp26b1(-0.48), Dhrs3(-0.59),
positive regulation of synaptic transmission	0.185098	0.219634	0.0790218	0.26754	15	0.404472	0.547135	0.0174356	0.631175	0.104129	Clstn3(0.38), Ptk2(0.14), Syde1(0.14), Snca(0.05), Ncs1(0.04), Hnrnpk(-0.04), Clstn1(-0.06), Ccl2(-0.17), Clstn2(-0.17), Prkcz(-0.18), Tnf(-0.26), Dlg4(-0.29), Kiss1r(-0.31), Slc1a3(-0.75), Retn(-3.17),
response to starvation	0.194178	0.234099	0.0791466	0.267706	16	0.376713	0.034419	0.122065	0.579063	0.477714	Pdk4(0.64), Zfp36(0.41), Ulk1(0.1), Fstl1(0.06), Ulk2(0.06), Atg7(0.06), Ddit3(0.05), Lrp11(-0.01), Cad(-0.11), Tbc1d5(-0.15), Tbc1d5(-0.15), Bcas3(-0.17), Acadm(-0.29), Hddc3(-0.4), Cckar(-0.61), Gcgr(-0.65),
regulation of lipid metabolic process	0.235431	0.163307	0.0793088	0.267999	27	0.29734	0.153099	0.547768	0.218383	0.173782	Irs2(0.33), Nr1d1(0.25), Lsr(0.16), Gpr39(0.16), Adipor1(0.14), Golm1(0.13), Opa3(0.13), Adgrf5(0.12), Ankrd26(0.07), H2afy(0.03), H2afy(0.03), Nr1d2(0.03), Bbs4(0.01), Smek2(-0.01), Fgfr4(-0.06), Dnajc15(-0.06), Prkce(-0.07), Psap(-0.17), Prkaa2(-0.17), Thrb(-0.26), Angptl8(-0.27), Angptl8(-0.27), Pparg(-0.32), Hnf4a(-0.39), Id2(-0.4), Tm6sf2(-0.57), Bcl11b(-0.68),
neurotransmitter transport	0.107665	0.221427	0.0796325	0.268836	28	0.483894	0.0272535	0.542844	0.0857101	0.530231	Slc6a14(1.36), Stx1a(0.42), Slc6a15(0.31), Rims3(0.3), Slc6a12(0.27), Slc6a17(0.25), Stx3(0.21), Rims2(0.21), Slc6a9(0.19), Ica1(0.16), Stx4a(0.07), Slc17a8(0.07), Stx1b(0.05), Synj1(-0.01), Slc18a2(-0.02), Slc6a19(-0.05), Slc6a20a(-0.06), Slc22a1(-0.1), Slc6a8(-0.14), Cplx2(-0.16), Slc18a1(-0.17), Slc6a6(-0.22), Slc6a20b(-0.36), Slc6a18(-0.39), Sv2a(-0.53), Slc6a13(-0.61), Slc6a13(-0.61), Slc6a4…
phosphohistidine phosphatase activity	0.165586	0.224005	0.0798082	0.268916	22	0.496041	0.0521189	0.332051	0.0398886	0.750506	Mtmr14(0.21), Dusp11(0.11), Nt5dc3(0.11), Nt5c(0.1), Ptpdc1(0.09), Ctdspl2(0.08), Phpt1(0.01), Phpt1(0.01), Mtmr6(0.01), Mdp1(0), Tns2(0), Sgpp2(-0.01), Plpp6(-0.02), Sacm1l(-0.06), Nt5m(-0.07), Pxylp1(-0.07), Mtmr7(-0.11), Nt5dc1(-0.11), Fig4(-0.17), Lhpp(-0.2), Epm2a(-0.24), Sgpp1(-0.26),
aorta morphogenesis	0.217569	0.266215	0.0802956	0.270043	11	0.0816303	0.672341	0.31285	0.246856	0.154485	Chd7(0.26), Sec24b(0.17), Jag1(0.08), Hes1(0.01), Nprl3(-0.06), Kat6a(-0.09), Kat6a(-0.09), Tbx2(-0.18), Lrp1(-0.26), Tfap2b(-0.27), Pdgfrb(-0.34),
endomembrane system	0.220885	0.109548	0.0806138	0.270599	72	0.234484	0.295467	0.371216	0.0862112	0.429404	Trpv2(0.62), Drd1(0.57), Sgsm1(0.33), Tbc1d15(0.31), Tbc1d8(0.24), Tbc1d9(0.24), Nrbp1(0.21), Nrbp1(0.21), Nrbp2(0.16), Stx12(0.13), Mon1b(0.12), Aig1(0.11), Tbc1d25(0.11), Nsmaf(0.1), Nenf(0.1), Tbc1d10b(0.1), Rundc1(0.1), Rps3(0.09), Tmem167(0.09), Arf1(0.08), Tbc1d1(0.07), Tbc1d30(0.07), Chmp1a(0.06), Stx8(0.05), Rac3(0.05), Tbc1d22a(0.05), Rabgap1(0.05), Cyb5d2(0.04), Pgrmc1(0.03), Panx1(0.03…
positive regulation of neuron differentiation	0.180865	0.130153	0.0809251	0.270873	68	0.446218	0.669708	0.141034	0.253521	0.0452534	Il6(1.08), Tgif1(0.49), Gprc5b(0.44), Nbl1(0.38), Socs2(0.38), Ngf(0.25), Impact(0.24), Itgb1(0.22), Map1b(0.22), Mmd(0.17), Zeb1(0.16), Tcf4(0.15), Bmp6(0.14), Actr3(0.14), Kctd11(0.13), Ccr5(0.12), Bmp2(0.11), Mapk8ip3(0.1), Bnip2(0.06), Trim32(0.06), Tcf12(0.04), Spag9(0.04), Cyb5d2(0.04), Hmg20b(0.03), Ccl5(0.03), Rhoa(0.02), Tcf3(0.02), Dab1(0.01), Prpf19(0), Rarb(-0.01), Dnmt3b(-0.02), Irx3…
ureteric bud development	0.188292	0.14952	0.081314	0.27169	48	0.233066	0.504165	0.638029	0.0480897	0.137114	Nog(0.78), Gdnf(0.72), Gdnf(0.72), Bmper(0.54), Smad1(0.42), Smad3(0.35), Tgfb1(0.26), Foxc1(0.19), Arg2(0.18), Smad6(0.18), Epcam(0.14), Fgfr2(0.08), Wt1(0.08), Smad9(0.08), Smad2(0.07), Foxc2(0.06), Smad5(0.06), Smad7(0.02), Ret(0), Vcan(-0.01), Dlg1(-0.01), Rarb(-0.01), Fgfr1(-0.03), Spry1(-0.05), Spry1(-0.05), Bcl2(-0.06), Rara(-0.06), Bdnf(-0.09), Bmp7(-0.09), Pax2(-0.1), Gdf11(-0.11), Robo2…
intrinsic component of plasma membrane	0.253582	0.198386	0.0813228	0.27169	19	0.327446	0.284174	0.137978	0.317973	0.293987	S1pr1(0.56), Tlr4(0.28), Ly96(0.2), Adipor1(0.14), Tgm2(0.07), Cd63(0.06), Alcam(0), Tlr2(-0.01), Tlr2(-0.01), Adipor2(-0.01), Tnfrsf21(-0.06), Slc34a1(-0.07), Xpr1(-0.13), Unc5a(-0.15), Adcy6(-0.17), Pdgfra(-0.34), Pdgfrb(-0.34), Prima1(-0.42), Scn4b(-1.08),
S-adenosylmethionine-dependent methyltransferase activity	0.153051	0.207913	0.0820665	0.273143	23	0.880588	0.00879293	0.41144	0.265708	0.143423	Pemt(0.19), Pemt(0.19), Mepce(0.14), Suv39h1(0.13), Nsun5(0.07), Pcmt1(0.05), Nop2(0.04), Rrp8(0.03), Coq3(0), Wbscr27(-0.01), Prmt7(-0.01), Gamt(-0.06), Armt1(-0.06), Armt1(-0.06), Mettl7b(-0.09), Coq5(-0.11), Nsun6(-0.15), Lcmt2(-0.15), 2700097O09Rik(-0.16), Mettl7a2(-0.19), As3mt(-0.24), Mettl7a1(-0.29), Tpmt(-0.38),
suckling behavior	0.206721	0.274563	0.0823743	0.27391	11	0.0658476	0.167612	0.185151	0.405295	0.691515	Pex13(0.08), Oxtr(0.04), Derl2(0.04), Ube2q1(0.02), App(0), Dach1(-0.05), Gls(-0.08), Aplp2(-0.1), Ubr3(-0.15), Phf21a(-0.17), Cntfr(-0.27),
positive regulation of synaptic transmission, glutamatergic	0.1924	0.251139	0.0824591	0.273934	16	0.131106	0.330223	0.850254	0.0569646	0.158282	Ptgs2(1.16), Glul(0.58), Drd1(0.57), Egfr(0.23), Shank3(0.19), Nlgn2(0.17), Ptk2b(0.1), Oxtr(0.04), Iqsec2(-0.1), Adora2a(-0.2), Ntrk2(-0.27), Reln(-0.36), Reln(-0.36), Gria4(-0.54), Ngfr(-0.83), Shank2(-0.87),
retina vasculature development in camera-type eye	0.18371	0.308877	0.0827939	0.274789	10	0.0935226	0.862028	0.443996	0.0588251	0.122029	Rom1(0.33), Pdgfb(0.25), Hif1a(0.24), Bmpr2(0.09), Cyp1b1(-0.11), Acvr2b(-0.17), Acvrl1(-0.23), Pdgfra(-0.34), Pdgfrb(-0.34), Pdgfrb(-0.34),
myelination in peripheral nervous system	0.222132	0.297977	0.0837882	0.277788	10	0.206505	0.24092	0.0746731	0.662288	0.294334	Ppp3r1(0.11), Sirt2(0.03), Sirt2(0.03), Ski(-0.01), Pard3(-0.01), Arhgef10(-0.03), Nf1(-0.09), Adam22(-0.11), Dag1(-0.12), Sh3tc2(-0.12),
hydrogen peroxide catabolic process	0.168893	0.315656	0.0838546	0.277788	15	0.606291	0.0210794	0.0737095	0.389088	0.658292	Txnrd1(0.3), Prdx1(0.14), Prdx5(0.05), Gpx3(0.04), Gpx3(0.04), Prdx6(0), Pxdn(0), Prdx2(-0.01), Prdx3(-0.1), Gpx1(-0.11), Gpx1(-0.11), Cat(-0.19), Cat(-0.19), Cat(-0.19), Apoa4(-0.33),
inositol-1,3,4,5,6-pentakisphosphate 3-phosphatase activity	0.189121	0.213805	0.0845791	0.279664	22	0.495948	0.0467376	0.331942	0.109329	0.609402	Mtmr14(0.21), Dusp11(0.11), Nt5dc3(0.11), Nt5c(0.1), Ptpdc1(0.09), Ctdspl2(0.08), Phpt1(0.01), Mtmr6(0.01), Mdp1(0), Tns2(0), Sgpp2(-0.01), Minpp1(-0.02), Plpp6(-0.02), Sacm1l(-0.06), Nt5m(-0.07), Pxylp1(-0.07), Mtmr7(-0.11), Nt5dc1(-0.11), Fig4(-0.17), Lhpp(-0.2), Epm2a(-0.24), Sgpp1(-0.26),
inositol-1,4,5,6-tetrakisphosphate 6-phosphatase activity	0.189121	0.213805	0.0845791	0.279664	22	0.495948	0.0467376	0.331942	0.109329	0.609402	Mtmr14(0.21), Dusp11(0.11), Nt5dc3(0.11), Nt5c(0.1), Ptpdc1(0.09), Ctdspl2(0.08), Phpt1(0.01), Mtmr6(0.01), Mdp1(0), Tns2(0), Sgpp2(-0.01), Minpp1(-0.02), Plpp6(-0.02), Sacm1l(-0.06), Nt5m(-0.07), Pxylp1(-0.07), Mtmr7(-0.11), Nt5dc1(-0.11), Fig4(-0.17), Lhpp(-0.2), Epm2a(-0.24), Sgpp1(-0.26),
copper ion binding	0.194788	0.137981	0.0850336	0.280725	46	0.442516	0.112263	0.330304	0.356019	0.18393	Mt1(0.77), Moxd1(0.51), Aoc2(0.36), Lox(0.32), Cp(0.26), Cp(0.26), Atox1(0.19), Sod1(0.14), Sod1(0.14), Gpc1(0.11), F5(0.1), Cox17(0.09), S100a13(0.09), Trp53(0.08), Cox11(0.08), Cutc(0.07), Loxl1(0.06), Pam(0.05), Snca(0.05), Park7(0.01), P2rx4(0), Ahcy(0), Adnp(-0.06), Commd1(-0.09), Lacc1(-0.09), Aoc3(-0.1), Heph(-0.12), Prnp(-0.12), Prnp(-0.12), Mettl17(-0.12), Cuta(-0.12), Rnpep(-0.12), Ccs(…
negative regulation of myelination	0.170419	0.331025	0.0850587	0.280725	10	0.35443	0.392295	0.0709754	0.389471	0.250949	Klk8(0.31), Mtmr2(0.03), Mtmr2(0.03), Eif2ak3(-0.04), Tnfrsf21(-0.06), Tnfrsf21(-0.06), Pten(-0.1), Fig4(-0.17), Fig4(-0.17), Tnf(-0.26),
regulation of mitochondrion organization	0.19407	0.288136	0.085328	0.281352	11	0.149053	0.0619165	0.618177	0.208052	0.51127	Golph3(0.08), Bnip3(0.04), Mul1(0.04), Pink1(0.02), Dnm1l(0.02), Dnm1l(0.02), Fis1(0), Atp13a2(-0.07), Atp13a2(-0.07), Park2(-0.42), Park2(-0.42),
triglyceride biosynthetic process	0.111498	0.301184	0.0856897	0.282208	15	0.145906	0.274371	0.313216	0.0305149	0.830305	Lpin3(0.4), Lpin2(0.25), Dgat1(0.1), Dgat1(0.1), Gpat4(0.09), Agpat9(0.01), Agpat9(0.01), Lpl(-0.06), Dgat2(-0.2), Dgat2(-0.2), Dgat2(-0.2), Gpam(-0.33), Lpin1(-0.38), Mogat2(-0.48), Gpat2(-0.54),
microvillus membrane	0.246359	0.221227	0.0857471	0.282208	15	0.189295	0.269053	0.45308	0.184959	0.292206	Itgb3(0.82), Ezr(0.23), Cd24a(0.21), Itgav(0.19), Scarb1(0.06), Podxl(0), Ctnnb1(-0.03), Cdhr5(-0.07), Cdhr2(-0.12), Mttp(-0.13), Adcy6(-0.17), Slc9a3r1(-0.28), Pdzk1(-0.51), Slc34a2(-0.63), Muc4(-1.02),
heart morphogenesis	0.166165	0.135353	0.0860368	0.282898	48	0.106147	0.735472	0.255971	0.617887	0.0187721	Chd7(0.26), Chd7(0.26), Lefty1(0.19), Fkbp1a(0.19), Foxc1(0.19), Col4a3bp(0.15), Asxl1(0.14), Bmpr1a(0.11), Ptch1(0.09), Flna(0.08), Dvl2(0.07), Kdm6a(0.07), Foxc2(0.06), Vegfa(0.06), Zmiz1(0.06), Ncor2(0.05), Ncor2(0.05), Xirp1(0.05), Pbrm1(0.05), Nipbl(0.05), Sos1(0.04), Dlc1(0.03), Mkl2(0.02), Rxra(0.01), Dvl3(0), Tgfb2(0), Baz1b(-0.04), Gaa(-0.05), Mtor(-0.07), Tab1(-0.07), Tbx3(-0.08), Smarc…
protein maturation	0.239316	0.199001	0.0863397	0.28363	20	0.42106	0.309909	0.304061	0.141851	0.220912	Psen1(0.18), Tspan17(0.15), Serpinh1(0.07), Tspan5(0.06), Tspan5(0.06), Aga(0.05), Psen2(0.03), Lmf2(0.01), Tspan14(0), Tspan14(0), Snapin(-0.02), Stub1(-0.03), Tspan33(-0.09), Tspan33(-0.09), Lmf1(-0.12), Tspan15(-0.14), Tspan15(-0.14), Ambp(-0.16), Sorl1(-0.27), Tesc(-0.34),
collagen metabolic process	0.183775	0.27378	0.0871111	0.285826	13	0.125074	0.659002	0.304961	0.0480765	0.450636	Hif1a(0.24), P2rx7(0.16), Id1(0.15), P3h1(0.06), P3h1(0.06), Prkcd(0.02), Tns2(0), Tgfbr3(-0.03), P3h3(-0.2), P3h2(-0.3), P3h2(-0.3), P3h2(-0.3), Tnxb(-0.5),
diacylglycerol kinase activity	0.226777	0.269748	0.0871698	0.285826	10	0.203042	0.0526894	0.327426	0.42316	0.521339	Dgke(0.35), Dgkh(0.16), Dgkd(0.1), Dgka(-0.09), Dgkz(-0.1), Dgkq(-0.14), Agk(-0.17), Dgkg(-0.24), Dgkb(-0.58), Dgkb(-0.58),
forebrain development	0.162083	0.122994	0.0874934	0.286622	60	0.170176	0.56743	0.439892	0.645082	0.00675386	Apaf1(0.34), Numbl(0.34), Ttbk2(0.23), Src(0.22), Nde1(0.22), Fyn(0.2), Fyn(0.2), Ikzf1(0.19), Psen1(0.18), Stil(0.16), Srf(0.14), Chrd(0.11), Hhex(0.1), Mapk8ip3(0.1), Kdm2b(0.09), Twsg1(0.09), Twsg1(0.09), Numb(0.05), Ncor2(0.05), Notch1(0.03), Notch1(0.03), Psen2(0.03), Dlc1(0.03), Mkl2(0.02), Mkl1(0.01), Aplp1(0), App(0), Top2b(-0.01), Smarca4(-0.02), Atrx(-0.02), Frs2(-0.02), Ctnnb1(-0.03), …
positive regulation of heart rate	0.184016	0.274878	0.0875756	0.286626	13	0.288462	0.819178	0.0577539	0.0735539	0.358542	Edn1(0.76), Sirt1(0.2), Ada(0.13), Adm(0.13), Scn5a(0.07), Edn3(0.01), Hey2(0), Trpm4(-0.02), Avpr1a(-0.08), Kcnq1(-0.16), Adra1a(-0.33), Slc1a1(-0.44), Adrb1(-0.57),
beta-catenin binding	0.211562	0.10923	0.0881739	0.288051	93	0.183362	0.185684	0.619661	0.525108	0.055425	Nos3(0.53), Cdh5(0.45), Sox9(0.41), Smad3(0.35), Cdh1(0.26), Cdh1(0.26), Cxadr(0.26), Cxadr(0.26), Klf4(0.24), Tcf7(0.21), Psen1(0.18), Psen1(0.18), Rgs19(0.18), Prmt2(0.17), Kdm6b(0.17), Setd1a(0.17), Calcoco1(0.16), Rora(0.15), Pxn(0.14), Tbl1xr1(0.14), Axin1(0.13), Axin1(0.13), Axin1(0.13), Tax1bp3(0.13), Lzic(0.12), Ptprj(0.1), Gsk3b(0.08), Gsk3b(0.08), Ctnna1(0.07), Cd2ap(0.07), Hdac6(0.06),…
protein localization to plasma membrane	0.235241	0.117227	0.0883519	0.288366	55	0.165771	0.619876	0.277681	0.293301	0.110949	Ramp3(0.52), Fcer1g(0.45), Emp2(0.37), Rac1(0.3), Rab10(0.27), Cdh1(0.26), Cacnb3(0.24), Atp1b3(0.23), Pigw(0.23), Cln3(0.2), Rab11a(0.18), Zfyve27(0.17), Calcr(0.15), Flot1(0.15), Rap2a(0.15), Fyb(0.09), Rab13(0.08), Sytl2(0.06), Stxbp1(0.05), Fcho2(0.05), Ehd2(0.05), Akt2(0.03), Ramp2(0.01), Ppil2(0.01), Myo5a(0), Dlg1(-0.01), Rapgef6(-0.01), Rapgef2(-0.02), Rab8a(-0.03), Rab8a(-0.03), Lrp6(-0.…
intracellular steroid hormone receptor signaling pathway	0.18754	0.222267	0.0893229	0.291123	17	0.325942	0.0175997	0.60439	0.67703	0.120137	Calcoco1(0.16), Med4(0.13), Nr6a1(0.05), Med13(0.05), Med12(0.04), Carm1(0.02), Med17(0.02), Thrap3(0.01), Med1(-0.01), Med16(-0.03), Med30(-0.05), Med14(-0.06), Med14(-0.06), Med24(-0.08), Esr1(-0.45), Gper1(-0.56), Gper1(-0.56),
trans-Golgi network transport vesicle	0.168955	0.278833	0.0893612	0.291123	13	0.158119	0.121097	0.0756431	0.900315	0.247163	Lyz2(0.15), Tgoln1(0.03), Spg21(0.03), Furin(0.02), Gopc(0), Rab8a(-0.03), Steap2(-0.03), Igf2r(-0.04), Rab27b(-0.04), Rab14(-0.05), Sort1(-0.3), Atp7a(-0.32), Slc2a4(-0.63),
damaged DNA binding	0.164757	0.147328	0.0901752	0.292986	56	0.517554	0.00714623	0.185651	0.704851	0.407429	Ercc1(0.62), Ercc1(0.62), H2afx(0.28), Cry2(0.24), Aptx(0.22), Xpa(0.16), Xpa(0.16), Rpa2(0.11), Rbbp8(0.11), Ogg1(0.1), Rps3(0.09), Rps3(0.09), Hmgb2(0.09), Trp53(0.08), Crebbp(0.07), Pcna(0.07), Polb(0.07), Ep300(0.06), Apex1(0.05), Rad1(0.05), Pold1(0.04), Dclre1c(0.04), Dclre1b(0.02), Ddb1(0.01), Ddb1(0.01), Cul4b(0.01), Polh(0), Rad23b(-0.01), Msh6(-0.02), Msh6(-0.02), Ung(-0.02), Neil1(-0.0…
camera-type eye development	0.187529	0.138383	0.0902559	0.292986	50	0.514482	0.570713	0.391245	0.216106	0.0158763	Rab3gap1(0.26), Chd7(0.26), Cdkn1c(0.22), Foxc1(0.19), Cryab(0.18), Pitx2(0.17), Tsku(0.16), Tbc1d20(0.13), Rcn1(0.09), Twsg1(0.09), Mterf4(0.09), Jag1(0.08), Wt1(0.08), Pknox1(0.07), Ahr(0.06), Foxc2(0.06), Shroom2(0.06), Tmem231(0.06), Rarg(0.04), Rxra(0.01), Med1(-0.01), Ski(-0.01), Gli3(-0.03), Arhgap35(-0.05), Grhl2(-0.05), Abi2(-0.05), Fkbp8(-0.06), Cacna1c(-0.07), Lmx1b(-0.07), Wdpcp(-0.07…
8-oxo-7,8-dihydroguanosine triphosphate pyrophosphatase activity	0.191661	0.263372	0.0902642	0.292986	13	0.703034	0.0958404	0.112165	0.227436	0.397627	Entpd7(0.22), Rhobtb3(0.12), Lsg1(0.09), Nudt17(0.08), Entpd2(-0.01), Dxo(-0.01), Nudt1(-0.06), Nudt1(-0.06), Nudt8(-0.11), Nudt7(-0.14), Nudt6(-0.22), Nudt19(-0.31), Nudt4(-0.33),
clathrin binding	0.237225	0.151146	0.0907084	0.293919	40	0.291204	0.46302	0.0888025	0.527619	0.14305	Syt5(1.57), Syt5(1.57), Syt11(0.38), Ldlrap1(0.24), Ldlrap1(0.24), Dab2(0.23), Syt2(0.23), Hip1r(0.22), Rph3al(0.14), Syt12(0.1), Ap2b1(0.09), Syt14(0.08), Syt17(0.07), Sytl2(0.06), Smap1(0.05), Sytl5(0.02), Snap91(-0.01), Picalm(-0.01), Tom1l1(-0.03), Trpc6(-0.04), Tom1l2(-0.04), Sytl4(-0.06), Syt9(-0.06), Clint1(-0.06), Sclt1(-0.11), Aftph(-0.16), Aftph(-0.16), Sytl1(-0.16), Syt7(-0.18), Doc2g(…
centrosome organization	0.0729381	0.223945	0.0907178	0.293919	35	0.527837	0.00600838	0.328115	0.290965	0.673409	Fes(0.33), Haus8(0.25), Xrcc2(0.19), Ssx2ip(0.17), Ppp1r12a(0.14), Haus4(0.13), Cep120(0.13), Haus1(0.09), Haus6(0.09), Slc16a1(0.07), Bnip2(0.06), Arl2(0.04), Golga2(0.02), Haus2(0.01), Bbs4(0.01), Sdccag8(-0.01), Ckap5(-0.05), Uxt(-0.06), Uxt(-0.06), Uxt(-0.06), Haus3(-0.06), Haus3(-0.06), Haus7(-0.09), Uvrag(-0.1), Uvrag(-0.1), Hepacam2(-0.11), Cdk5rap2(-0.11), Chd3(-0.11), Cep68(-0.14), Pcm1(…
cell projection organization	0.145756	0.0997165	0.0911501	0.29505	125	0.530777	0.307138	0.00831599	0.839913	0.124074	Snx10(1.16), Ccno(1.03), Ift43(0.31), Tmem237(0.26), Twf2(0.25), D1Ertd622e(0.25), Plek(0.21), P2ry12(0.2), Dnaaf3(0.2), E2f5(0.19), Ahi1(0.19), Ptpn23(0.19), Ssx2ip(0.17), Mark4(0.17), Snap29(0.15), Cep83(0.15), Capzb(0.14), Kif3a(0.14), Actr3(0.14), Ccp110(0.14), Tmem17(0.14), Cluap1(0.13), Poc1b(0.13), Akt1(0.11), Cfl1(0.11), Tmem138(0.11), E2f4(0.1), Ptpdc1(0.09), Hap1(0.08), Flna(0.08), Ofd1…
adult locomotory behavior	0.231306	0.120985	0.0913345	0.295068	48	0.154055	0.403677	0.375715	0.390418	0.13099	Tbce(0.94), Ntf5(0.63), Nr4a2(0.32), Ngf(0.25), Cstb(0.24), Fgf12(0.21), Btbd9(0.19), Atxn1(0.17), Grin2d(0.13), Cln8(0.09), Pafah1b1(0.07), Pafah1b1(0.07), Snca(0.05), Pbx3(0.01), Park7(0.01), App(0), Cnp(0), Mecp2(0), Tsc1(0), Kalrn(0), Hipk2(-0.01), Ccnd2(-0.02), Hoxb8(-0.03), Chl1(-0.05), Pum1(-0.06), Arcn1(-0.06), Hoxd9(-0.09), Gigyf2(-0.09), Ntan1(-0.1), Adam22(-0.11), Clcn3(-0.11), Ppt1(-0…
negative regulation of phosphatidylinositol 3-kinase signaling	0.169189	0.283799	0.0914075	0.295068	12	0.486354	0.818733	0.156484	0.0533513	0.108811	Klf4(0.24), Serpine2(0.17), Twist1(0.07), Stambp(0.05), Pik3ip1(0.01), Pik3ip1(0.01), Dab2ip(-0.01), Ncor1(-0.15), Tsc2(-0.17), Slc9a3r2(-0.25), Slc9a3r1(-0.28), Slc9a3r1(-0.28),
neurological system process	0.207425	0.250131	0.0916208	0.295068	14	0.283965	0.27643	0.0758792	0.290134	0.56949	Cacna1a(0.49), Adgrv1(0.44), Adgrv1(0.44), Chrnb1(0.31), Axin1(0.13), Atg7(0.06), Wfs1(0.05), Wdr19(0.04), Chrnb2(-0.2), Gm2a(-0.23), Grm7(-0.35), Cacnb4(-0.5), Chrna4(-1.02), Chrna4(-1.02),
positive regulation of telomere capping	0.235898	0.210571	0.0916579	0.295068	17	0.233582	0.186969	0.271481	0.597182	0.15942	Nek2(0.26), Map2k7(0.2), Nek7(0.19), Tnks2(0.07), Mapk3(0.03), Pnkp(0), Mapk1(-0.05), Nabp2(-0.06), Nabp2(-0.06), Rtel1(-0.06), Tnks(-0.07), Pkib(-0.14), Map3k4(-0.19), Prkcq(-0.2), Mapkapk5(-0.33), Aurkb(-0.38), Mapk15(-0.43),
COPI-coated vesicle	0.224403	0.27354	0.0917253	0.295068	11	0.235077	0.542383	0.129377	0.130855	0.457415	Tmed2(0.13), Arf1(0.08), Pacs1(0.08), Cope(0.03), Tmed10(-0.02), Copb1(-0.02), Arcn1(-0.06), Ccdc115(-0.08), 1190002N15Rik(-0.16), Copz2(-0.36), Pacsin1(-1.03),
barbed-end actin filament capping	0.172324	0.270091	0.0918771	0.295242	13	0.043337	0.600803	0.136674	0.672274	0.193409	Capzb(0.14), Capza1(0.11), Capza2(0.09), Capg(0.06), Evl(0.04), Twf1(0.02), Add2(-0.02), Gsn(-0.09), Rdx(-0.1), Add1(-0.14), Eps8(-0.22), Eps8(-0.22), Vil1(-0.46),
positive regulation of B cell proliferation	0.0964468	0.205987	0.0922899	0.296298	39	0.237642	0.736789	0.0530777	0.312932	0.216792	Cdkn1a(0.54), Slc39a10(0.34), Irs2(0.33), Tirap(0.3), Tlr4(0.28), Ptprc(0.24), Ptprc(0.24), Ada(0.13), Mif(0.12), Peli1(0.11), Il7(0.09), Il7(0.09), Clcf1(0.07), Sash3(0.06), Nckap1l(0.06), Cd38(0.02), Cd38(0.02), Bmi1(-0.04), Cd74(-0.05), Bcl2(-0.06), Ticam1(-0.08), Vav3(-0.09), Bst1(-0.13), Cd81(-0.17), Cd81(-0.17), Nfatc2(-0.17), Gpr183(-0.18), Gpr183(-0.18), Chrnb2(-0.2), Chrnb2(-0.2), Tfrc(-…
NAD-dependent histone deacetylase activity (H3-K14 specific)	0.245481	0.234157	0.0923734	0.296298	12	0.296313	0.36063	0.535518	0.150706	0.129326	Hdac7(0.07), Hdac1(0.07), Hdac5(0.06), Hdac6(0.06), Hdac4(0.06), Hdac2(0.05), Hdac3(0.03), Hdac8(-0.15), Hdac10(-0.16), Sirt3(-0.28), Hdac11(-0.28), Hdac9(-0.83),
positive regulation of mitochondrial calcium ion concentration	0.186619	0.28143	0.0927968	0.297387	12	0.485107	0.0771188	0.0558651	0.69662	0.336467	Rap1gds1(0.11), Mcu(0.1), Mcu(0.1), Tgm2(0.07), Tgm2(0.07), Bcap31(0.07), Fis1(0), Micu1(-0.05), Micu2(-0.06), Mcur1(-0.3), Mcur1(-0.3), Atp2a1(-1.83),
negative regulation of intracellular estrogen receptor signaling pathway	0.211595	0.264288	0.0929461	0.297596	11	0.551751	0.114862	0.349789	0.0505338	0.555131	Cnot9(0.12), Cnot2(0.09), Phb2(0.03), Phb2(0.03), Strn3(-0.01), Cyp7b1(-0.06), Cnot1(-0.11), Kank2(-0.26), Zfp366(-0.35), Zfp366(-0.35), Brca1(-0.57),
prostaglandin metabolic process	0.168367	0.272781	0.0932417	0.298124	16	0.103037	0.934977	0.125369	0.138252	0.166851	Ptgs2(1.16), Pdpn(0.2), Ptges3(0.19), Tnfrsf1a(0.13), Ptges(0.12), Acox1(-0.05), Hpgd(-0.06), Hpgds(-0.09), Hpgds(-0.09), Ptgds(-0.12), Ptges2(-0.12), Fam213b(-0.2), Tbxas1(-0.22), Ptgis(-0.24), Ptgs1(-0.24), Ptgr2(-0.47),
phosphatidylinositol-3,5-bisphosphate 3-phosphatase activity	0.195796	0.207166	0.0932796	0.298124	25	0.443207	0.0346497	0.363234	0.118895	0.704091	Mtmr14(0.21), Dusp11(0.11), Nt5dc3(0.11), Nt5c(0.1), Mtm1(0.09), Ptpdc1(0.09), Ctdspl2(0.08), Mtmr2(0.03), Phpt1(0.01), Mtmr6(0.01), Mdp1(0), Tns2(0), Sgpp2(-0.01), Mtmr3(-0.02), Plpp6(-0.02), Sacm1l(-0.06), Nt5m(-0.07), Pxylp1(-0.07), Mtmr1(-0.08), Mtmr7(-0.11), Nt5dc1(-0.11), Fig4(-0.17), Lhpp(-0.2), Epm2a(-0.24), Sgpp1(-0.26),
extracellular matrix binding	0.142854	0.266737	0.093446	0.298386	24	0.40209	0.939203	0.177783	0.0997896	0.0204368	Itgb3(0.82), Spp1(0.53), Cyr61(0.4), Thbs1(0.36), Itga2b(0.23), Olfml2b(0.22), Itgav(0.19), Dcn(0.07), Vegfa(0.06), Spock2(0.04), Sparc(0.03), Adamts5(0.03), Tgfbi(-0.02), Nid1(-0.03), Adgrg1(-0.14), Olfml2a(-0.19), Sparcl1(-0.22), Ssc5d(-0.27), Eln(-0.3), Bgn(-0.33), Cd248(-0.35), Adamts15(-0.41), Fbln2(-0.47), Smoc1(-1.28),
positive regulation of triglyceride biosynthetic process	0.201574	0.22231	0.0938297	0.299252	19	0.196148	0.207595	0.15791	0.361687	0.532358	Acsl6(0.41), Srebf1(0.18), Srebf1(0.18), Nr1h2(0.16), Cnep1r1(0.13), Dgat1(0.1), Scarb1(0.06), Ctdnep1(0.03), Acsl5(-0.05), Nr1h3(-0.07), Rgn(-0.08), Tcf7l2(-0.13), Ldlr(-0.14), Gpld1(-0.15), Dgat2(-0.2), Plin5(-0.24), Plin5(-0.24), Gpam(-0.33), Apoc3(-0.39),
response to antibiotic	0.206216	0.235899	0.0940817	0.299252	16	0.425327	0.454819	0.173761	0.18238	0.213243	Ppp2cb(0.26), Jak2(0.16), Id1(0.15), Jak1(0.06), Hyal1(-0.02), Dusp18(-0.04), Cyb5r4(-0.05), Aoc3(-0.1), Zc3h8(-0.1), Rsrc1(-0.13), Endog(-0.25), Vkorc1(-0.26), Aoc1(-0.3), Alpl(-0.48), Slc1a3(-0.75), Ciita(-0.82),
dihydrotestosterone 17-beta-dehydrogenase activity	0.21136	0.196858	0.0947956	0.300546	20	0.355826	0.0677643	0.518697	0.300739	0.275732	Rdh12(1.22), Akr1c21(0.71), Hsd3b7(0.24), Sdr42e1(0.13), Kcnab1(0.1), Ctbp1(0.07), Rdh13(-0.03), Cbr4(-0.06), Bdh2(-0.07), Rdh14(-0.07), H2-Ke6(-0.08), Adh5(-0.09), Sdr39u1(-0.09), Akr1c18(-0.1), Htatip2(-0.12), Aifm1(-0.21), Wwox(-0.21), Kcnab2(-0.24), Akr1c13(-0.24), Hsd11b2(-1.29),
positive regulation of histone H3-K4 methylation	0.208784	0.246464	0.0948018	0.300546	15	0.320956	0.0190824	0.529087	0.401246	0.413749	Smad4(0.13), Rtf1(0.12), Auts2(0.08), Ctr9(0.01), Ctr9(0.01), Dnmt1(-0.01), Nelfa(-0.01), Dnmt3b(-0.02), Snw1(-0.03), Wdr61(-0.05), Paxip1(-0.06), Ogt(-0.07), Kmt2a(-0.07), Brca1(-0.57), Brca1(-0.57),
UV protection	0.234439	0.253919	0.096074	0.301941	14	0.0652605	0.37125	0.353218	0.396013	0.331611	Ercc1(0.62), Scara3(0.06), Ercc5(0.05), Ercc5(0.05), Ercc5(0.05), Sdf4(0.04), Sdf4(0.04), Ercc2(-0.01), Ercc2(-0.01), Ercc3(-0.03), Ercc4(-0.09), Gpx1(-0.11), Cat(-0.19), Mfap4(-0.48),
gastrulation with mouth forming second	0.136362	0.213347	0.0966712	0.301941	25	0.639702	0.063171	0.624563	0.120717	0.188448	Rnf2(0.14), Ldb1(0.13), Smad4(0.13), Chrd(0.11), Nat8f1(0.1), Zbtb17(0.05), Ugdh(0.04), Plpp3(0.03), Acvr2a(0.02), Acvr1(0), Nsd1(-0.02), Frs2(-0.02), Ctnnb1(-0.03), Lrp6(-0.05), Dact1(-0.06), Amot(-0.08), Lhx1(-0.14), Lrp5(-0.14), Acvr2b(-0.17), Nat8(-0.18), Celsr1(-0.23), Nat8f5(-0.28), Tenm4(-0.49), Nat8f2(-0.5), Nat8f3(-0.79),
C-3 sterol dehydrogenase (C-4 sterol decarboxylase) activity	0.226337	0.194809	0.0974992	0.301941	19	0.334283	0.114066	0.379062	0.421815	0.223838	Rdh12(1.22), Akr1c21(0.71), Hsd3b7(0.24), Sdr42e1(0.13), Kcnab1(0.1), Ctbp1(0.07), Rdh13(-0.03), Cbr4(-0.06), Bdh2(-0.07), Rdh14(-0.07), H2-Ke6(-0.08), Adh5(-0.09), Sdr39u1(-0.09), Htatip2(-0.12), Aifm1(-0.21), Wwox(-0.21), Kcnab2(-0.24), Akr1c13(-0.24), Hsd11b2(-1.29),
mevaldate reductase activity	0.226337	0.194809	0.0974992	0.301941	19	0.334283	0.114066	0.379062	0.421815	0.223838	Rdh12(1.22), Akr1c21(0.71), Hsd3b7(0.24), Sdr42e1(0.13), Kcnab1(0.1), Ctbp1(0.07), Rdh13(-0.03), Cbr4(-0.06), Bdh2(-0.07), Rdh14(-0.07), H2-Ke6(-0.08), Adh5(-0.09), Sdr39u1(-0.09), Htatip2(-0.12), Aifm1(-0.21), Wwox(-0.21), Kcnab2(-0.24), Akr1c13(-0.24), Hsd11b2(-1.29),
gluconate dehydrogenase activity	0.226337	0.194809	0.0974992	0.301941	19	0.334283	0.114066	0.379062	0.421815	0.223838	Rdh12(1.22), Akr1c21(0.71), Hsd3b7(0.24), Sdr42e1(0.13), Kcnab1(0.1), Ctbp1(0.07), Rdh13(-0.03), Cbr4(-0.06), Bdh2(-0.07), Rdh14(-0.07), H2-Ke6(-0.08), Adh5(-0.09), Sdr39u1(-0.09), Htatip2(-0.12), Aifm1(-0.21), Wwox(-0.21), Kcnab2(-0.24), Akr1c13(-0.24), Hsd11b2(-1.29),
epoxide dehydrogenase activity	0.226337	0.194809	0.0974992	0.301941	19	0.334283	0.114066	0.379062	0.421815	0.223838	Rdh12(1.22), Akr1c21(0.71), Hsd3b7(0.24), Sdr42e1(0.13), Kcnab1(0.1), Ctbp1(0.07), Rdh13(-0.03), Cbr4(-0.06), Bdh2(-0.07), Rdh14(-0.07), H2-Ke6(-0.08), Adh5(-0.09), Sdr39u1(-0.09), Htatip2(-0.12), Aifm1(-0.21), Wwox(-0.21), Kcnab2(-0.24), Akr1c13(-0.24), Hsd11b2(-1.29),
5-exo-hydroxycamphor dehydrogenase activity	0.226337	0.194809	0.0974992	0.301941	19	0.334283	0.114066	0.379062	0.421815	0.223838	Rdh12(1.22), Akr1c21(0.71), Hsd3b7(0.24), Sdr42e1(0.13), Kcnab1(0.1), Ctbp1(0.07), Rdh13(-0.03), Cbr4(-0.06), Bdh2(-0.07), Rdh14(-0.07), H2-Ke6(-0.08), Adh5(-0.09), Sdr39u1(-0.09), Htatip2(-0.12), Aifm1(-0.21), Wwox(-0.21), Kcnab2(-0.24), Akr1c13(-0.24), Hsd11b2(-1.29),
2-hydroxytetrahydrofuran dehydrogenase activity	0.226337	0.194809	0.0974992	0.301941	19	0.334283	0.114066	0.379062	0.421815	0.223838	Rdh12(1.22), Akr1c21(0.71), Hsd3b7(0.24), Sdr42e1(0.13), Kcnab1(0.1), Ctbp1(0.07), Rdh13(-0.03), Cbr4(-0.06), Bdh2(-0.07), Rdh14(-0.07), H2-Ke6(-0.08), Adh5(-0.09), Sdr39u1(-0.09), Htatip2(-0.12), Aifm1(-0.21), Wwox(-0.21), Kcnab2(-0.24), Akr1c13(-0.24), Hsd11b2(-1.29),
acetoin dehydrogenase activity	0.226337	0.194809	0.0974992	0.301941	19	0.334283	0.114066	0.379062	0.421815	0.223838	Rdh12(1.22), Akr1c21(0.71), Hsd3b7(0.24), Sdr42e1(0.13), Kcnab1(0.1), Ctbp1(0.07), Rdh13(-0.03), Cbr4(-0.06), Bdh2(-0.07), Rdh14(-0.07), H2-Ke6(-0.08), Adh5(-0.09), Sdr39u1(-0.09), Htatip2(-0.12), Aifm1(-0.21), Wwox(-0.21), Kcnab2(-0.24), Akr1c13(-0.24), Hsd11b2(-1.29),
phenylcoumaran benzylic ether reductase activity	0.226337	0.194809	0.0974992	0.301941	19	0.334283	0.114066	0.379062	0.421815	0.223838	Rdh12(1.22), Akr1c21(0.71), Hsd3b7(0.24), Sdr42e1(0.13), Kcnab1(0.1), Ctbp1(0.07), Rdh13(-0.03), Cbr4(-0.06), Bdh2(-0.07), Rdh14(-0.07), H2-Ke6(-0.08), Adh5(-0.09), Sdr39u1(-0.09), Htatip2(-0.12), Aifm1(-0.21), Wwox(-0.21), Kcnab2(-0.24), Akr1c13(-0.24), Hsd11b2(-1.29),
D-xylose:NADP reductase activity	0.226337	0.194809	0.0974992	0.301941	19	0.334283	0.114066	0.379062	0.421815	0.223838	Rdh12(1.22), Akr1c21(0.71), Hsd3b7(0.24), Sdr42e1(0.13), Kcnab1(0.1), Ctbp1(0.07), Rdh13(-0.03), Cbr4(-0.06), Bdh2(-0.07), Rdh14(-0.07), H2-Ke6(-0.08), Adh5(-0.09), Sdr39u1(-0.09), Htatip2(-0.12), Aifm1(-0.21), Wwox(-0.21), Kcnab2(-0.24), Akr1c13(-0.24), Hsd11b2(-1.29),
L-arabinose:NADP reductase activity	0.226337	0.194809	0.0974992	0.301941	19	0.334283	0.114066	0.379062	0.421815	0.223838	Rdh12(1.22), Akr1c21(0.71), Hsd3b7(0.24), Sdr42e1(0.13), Kcnab1(0.1), Ctbp1(0.07), Rdh13(-0.03), Cbr4(-0.06), Bdh2(-0.07), Rdh14(-0.07), H2-Ke6(-0.08), Adh5(-0.09), Sdr39u1(-0.09), Htatip2(-0.12), Aifm1(-0.21), Wwox(-0.21), Kcnab2(-0.24), Akr1c13(-0.24), Hsd11b2(-1.29),
D-arabinitol dehydrogenase, D-ribulose forming (NADP+) activity	0.226337	0.194809	0.0974992	0.301941	19	0.334283	0.114066	0.379062	0.421815	0.223838	Rdh12(1.22), Akr1c21(0.71), Hsd3b7(0.24), Sdr42e1(0.13), Kcnab1(0.1), Ctbp1(0.07), Rdh13(-0.03), Cbr4(-0.06), Bdh2(-0.07), Rdh14(-0.07), H2-Ke6(-0.08), Adh5(-0.09), Sdr39u1(-0.09), Htatip2(-0.12), Aifm1(-0.21), Wwox(-0.21), Kcnab2(-0.24), Akr1c13(-0.24), Hsd11b2(-1.29),
steroid dehydrogenase activity, acting on the CH-OH group of donors, NAD or NADP as acceptor	0.226337	0.194809	0.0974992	0.301941	19	0.334283	0.114066	0.379062	0.421815	0.223838	Rdh12(1.22), Akr1c21(0.71), Hsd3b7(0.24), Sdr42e1(0.13), Kcnab1(0.1), Ctbp1(0.07), Rdh13(-0.03), Cbr4(-0.06), Bdh2(-0.07), Rdh14(-0.07), H2-Ke6(-0.08), Adh5(-0.09), Sdr39u1(-0.09), Htatip2(-0.12), Aifm1(-0.21), Wwox(-0.21), Kcnab2(-0.24), Akr1c13(-0.24), Hsd11b2(-1.29),
steroid dehydrogenase activity, acting on the CH-CH group of donors	0.226337	0.194809	0.0974992	0.301941	19	0.334283	0.114066	0.379062	0.421815	0.223838	Rdh12(1.22), Akr1c21(0.71), Hsd3b7(0.24), Sdr42e1(0.13), Kcnab1(0.1), Ctbp1(0.07), Rdh13(-0.03), Cbr4(-0.06), Bdh2(-0.07), Rdh14(-0.07), H2-Ke6(-0.08), Adh5(-0.09), Sdr39u1(-0.09), Htatip2(-0.12), Aifm1(-0.21), Wwox(-0.21), Kcnab2(-0.24), Akr1c13(-0.24), Hsd11b2(-1.29),
(R)-(-)-1,2,3,4-tetrahydronaphthol dehydrogenase activity	0.226337	0.194809	0.0974992	0.301941	19	0.334283	0.114066	0.379062	0.421815	0.223838	Rdh12(1.22), Akr1c21(0.71), Hsd3b7(0.24), Sdr42e1(0.13), Kcnab1(0.1), Ctbp1(0.07), Rdh13(-0.03), Cbr4(-0.06), Bdh2(-0.07), Rdh14(-0.07), H2-Ke6(-0.08), Adh5(-0.09), Sdr39u1(-0.09), Htatip2(-0.12), Aifm1(-0.21), Wwox(-0.21), Kcnab2(-0.24), Akr1c13(-0.24), Hsd11b2(-1.29),
3-hydroxymenthone dehydrogenase activity	0.226337	0.194809	0.0974992	0.301941	19	0.334283	0.114066	0.379062	0.421815	0.223838	Rdh12(1.22), Akr1c21(0.71), Hsd3b7(0.24), Sdr42e1(0.13), Kcnab1(0.1), Ctbp1(0.07), Rdh13(-0.03), Cbr4(-0.06), Bdh2(-0.07), Rdh14(-0.07), H2-Ke6(-0.08), Adh5(-0.09), Sdr39u1(-0.09), Htatip2(-0.12), Aifm1(-0.21), Wwox(-0.21), Kcnab2(-0.24), Akr1c13(-0.24), Hsd11b2(-1.29),
very long-chain-3-hydroxyacyl-CoA dehydrogenase activity	0.226337	0.194809	0.0974992	0.301941	19	0.334283	0.114066	0.379062	0.421815	0.223838	Rdh12(1.22), Akr1c21(0.71), Hsd3b7(0.24), Sdr42e1(0.13), Kcnab1(0.1), Ctbp1(0.07), Rdh13(-0.03), Cbr4(-0.06), Bdh2(-0.07), Rdh14(-0.07), H2-Ke6(-0.08), Adh5(-0.09), Sdr39u1(-0.09), Htatip2(-0.12), Aifm1(-0.21), Wwox(-0.21), Kcnab2(-0.24), Akr1c13(-0.24), Hsd11b2(-1.29),
(R)-2-hydroxyisocaproate dehydrogenase activity	0.226337	0.194809	0.0974992	0.301941	19	0.334283	0.114066	0.379062	0.421815	0.223838	Rdh12(1.22), Akr1c21(0.71), Hsd3b7(0.24), Sdr42e1(0.13), Kcnab1(0.1), Ctbp1(0.07), Rdh13(-0.03), Cbr4(-0.06), Bdh2(-0.07), Rdh14(-0.07), H2-Ke6(-0.08), Adh5(-0.09), Sdr39u1(-0.09), Htatip2(-0.12), Aifm1(-0.21), Wwox(-0.21), Kcnab2(-0.24), Akr1c13(-0.24), Hsd11b2(-1.29),
L-arabinose 1-dehydrogenase (NADP+) activity	0.226337	0.194809	0.0974992	0.301941	19	0.334283	0.114066	0.379062	0.421815	0.223838	Rdh12(1.22), Akr1c21(0.71), Hsd3b7(0.24), Sdr42e1(0.13), Kcnab1(0.1), Ctbp1(0.07), Rdh13(-0.03), Cbr4(-0.06), Bdh2(-0.07), Rdh14(-0.07), H2-Ke6(-0.08), Adh5(-0.09), Sdr39u1(-0.09), Htatip2(-0.12), Aifm1(-0.21), Wwox(-0.21), Kcnab2(-0.24), Akr1c13(-0.24), Hsd11b2(-1.29),
L-xylulose reductase (NAD+) activity	0.226337	0.194809	0.0974992	0.301941	19	0.334283	0.114066	0.379062	0.421815	0.223838	Rdh12(1.22), Akr1c21(0.71), Hsd3b7(0.24), Sdr42e1(0.13), Kcnab1(0.1), Ctbp1(0.07), Rdh13(-0.03), Cbr4(-0.06), Bdh2(-0.07), Rdh14(-0.07), H2-Ke6(-0.08), Adh5(-0.09), Sdr39u1(-0.09), Htatip2(-0.12), Aifm1(-0.21), Wwox(-0.21), Kcnab2(-0.24), Akr1c13(-0.24), Hsd11b2(-1.29),
3-ketoglucose-reductase activity	0.226337	0.194809	0.0974992	0.301941	19	0.334283	0.114066	0.379062	0.421815	0.223838	Rdh12(1.22), Akr1c21(0.71), Hsd3b7(0.24), Sdr42e1(0.13), Kcnab1(0.1), Ctbp1(0.07), Rdh13(-0.03), Cbr4(-0.06), Bdh2(-0.07), Rdh14(-0.07), H2-Ke6(-0.08), Adh5(-0.09), Sdr39u1(-0.09), Htatip2(-0.12), Aifm1(-0.21), Wwox(-0.21), Kcnab2(-0.24), Akr1c13(-0.24), Hsd11b2(-1.29),
D-arabinitol dehydrogenase, D-xylulose forming (NADP+) activity	0.226337	0.194809	0.0974992	0.301941	19	0.334283	0.114066	0.379062	0.421815	0.223838	Rdh12(1.22), Akr1c21(0.71), Hsd3b7(0.24), Sdr42e1(0.13), Kcnab1(0.1), Ctbp1(0.07), Rdh13(-0.03), Cbr4(-0.06), Bdh2(-0.07), Rdh14(-0.07), H2-Ke6(-0.08), Adh5(-0.09), Sdr39u1(-0.09), Htatip2(-0.12), Aifm1(-0.21), Wwox(-0.21), Kcnab2(-0.24), Akr1c13(-0.24), Hsd11b2(-1.29),
lipoprotein transport	0.179077	0.246719	0.0975462	0.301941	17	0.0628591	0.0410839	0.444235	0.341743	0.82127	Lsr(0.16), Apob(0.11), Apob(0.11), Msr1(0.08), Unc119b(0.06), Zdhhc17(-0.01), Cd36(-0.02), Cd36(-0.02), Unc119(-0.07), Unc119(-0.07), Apobec1(-0.08), Mttp(-0.13), Mttp(-0.13), Pparg(-0.32), Lrp2(-0.34), Apoc3(-0.39), Cubn(-0.53),
lysosome localization	0.224771	0.200035	0.0978145	0.302507	17	0.101204	0.0911991	0.449844	0.457382	0.479067	Bloc1s2(0.26), Borcs6(0.17), Vps33b(0.11), Lamtor1(0.08), Hdac6(0.06), Snapin(-0.02), Arl8b(-0.02), Bloc1s1(-0.04), Rab34(-0.07), Kxd1(-0.1), Plekhm2(-0.11), Tmem106b(-0.14), Tmem106b(-0.14), Vps33a(-0.17), Borcs5(-0.29), Map6(-0.51), Map6(-0.51),
skeletal system development	0.213426	0.112462	0.0983413	0.303692	90	0.160874	0.622556	0.350193	0.356347	0.0728084	Mmp9(1.42), Mmp9(1.42), Nog(0.78), Edn1(0.76), Sox4(0.67), Col11a2(0.45), Epha2(0.43), Rassf2(0.42), Sox9(0.41), Smad3(0.35), Runx1(0.28), Tgfbr1(0.27), Tgfb1(0.26), Chd7(0.26), Cdkn1c(0.22), Zbtb16(0.21), Foxc1(0.19), Trappc2(0.19), Col5a2(0.17), Fgfrl1(0.17), Lgals3(0.14), Sh3pxd2b(0.14), Sh3pxd2b(0.14), Hspb11(0.13), Wdr5(0.12), Chrd(0.11), Pkdcc(0.11), Impad1(0.11), Rpl38(0.1), Rpl38(0.1), Cl…
regulation of G1/S transition of mitotic cell cycle	0.205786	0.250196	0.0983694	0.303692	15	0.358933	0.622538	0.0608512	0.327922	0.19932	Pdpn(0.2), Senp2(0.18), Psme2(0.14), Hacd1(0.14), Ino80(0.04), Psme1(0.01), Psme3(0), Ptpn6(-0.04), Ecd(-0.07), Pid1(-0.2), Bid(-0.37), Id2(-0.4), Tjp3(-0.46), Ccnd1(-0.53), E2f1(-0.64),
vesicle docking involved in exocytosis	0.193949	0.193241	0.0986656	0.304335	24	0.0646034	0.30309	0.293032	0.738782	0.17233	Exoc6b(0.24), Plek(0.21), Rab8b(0.2), Ykt6(0.11), Ykt6(0.11), Vps33b(0.11), Rab13(0.08), Sytl2(0.06), Stxbp1(0.05), Vps18(0.03), Stxbp3(0), Scfd1(-0.02), Rab8a(-0.03), Rab8a(-0.03), Stxbp2(-0.03), Bloc1s6(-0.04), Exoc6(-0.04), Vps11(-0.07), Vps45(-0.13), Vps33a(-0.17), Scfd2(-0.27), Exoc4(-0.32), Cftr(-0.35), Kcnb1(-0.58),
regulation of protein processing	0.215578	0.289723	0.0987498	0.304335	10	0.644272	0.208864	0.235672	0.516629	0.0389868	Notch4(0.2), Rps6ka2(0.11), Rps6ka2(0.11), Prkacb(-0.02), Rnf139(-0.06), Prkaca(-0.07), Ift88(-0.1), Ift52(-0.14), Inpp5b(-0.24), Ldlrad3(-0.24),
protein O-linked mannosylation	0.249667	0.221763	0.0991609	0.305336	15	0.123799	0.146402	0.290807	0.384581	0.569984	Dpm2(0.2), Dpm1(0.18), Dpm1(0.18), Tmem5(0.14), Alg5(0.01), Pomgnt2(-0.03), Large1(-0.04), Large1(-0.04), Dpm3(-0.06), Ispd(-0.12), Fkrp(-0.12), Fktn(-0.16), B4gat1(-0.22), Large2(-0.36), Large2(-0.36),
neuromuscular junction development	0.218514	0.166568	0.0999883	0.307277	31	0.0671317	0.656498	0.268522	0.484799	0.132252	Tnc(0.41), Unc13a(0.41), Dok7(0.39), Dok7(0.39), Musk(0.36), Musk(0.36), Cacnb3(0.24), Unc13b(0.23), Pak1(0.1), Fgfr2(0.08), Col4a1(0.07), Dvl1(0.05), Cacnb2(0.03), Erbb2(0.03), Als2(0.01), Kalrn(0), Rer1(-0.01), Afg3l2(-0.03), Lamb2(-0.09), Nedd4(-0.11), Utrn(-0.16), Cacnb1(-0.23), Dnaja3(-0.24), Ntrk2(-0.27), Snta1(-0.3), Cacna2d2(-0.32), Agrn(-0.4), Col4a5(-0.43), Cacnb4(-0.5), Lrrk2(-0.61), P…
ciliary transition zone	0.188322	0.186303	0.100085	0.307277	34	0.386021	0.264524	0.0138138	0.718195	0.374355	Tmem237(0.26), Tmem237(0.26), D1Ertd622e(0.25), Ttbk2(0.23), Ttbk2(0.23), Tmem17(0.14), Sept2(0.13), Tmem80(0.1), Tctn1(0.08), Unc119b(0.06), Tmem231(0.06), Tmem107(0.02), Cetn3(0.01), Bbs4(0.01), Mks1(0.01), Mks1(0.01), Nphp4(-0.05), Tmem216(-0.06), Cep131(-0.07), Cep131(-0.07), Tmem67(-0.08), B9d1(-0.09), Traf3ip1(-0.1), Ccsap(-0.11), Ccsap(-0.11), 2410089E03Rik(-0.12), Cep290(-0.16), Cep290(-0…
cardiovascular system development	0.221593	0.233301	0.100213	0.307277	15	0.409	0.452647	0.0336607	0.406785	0.326903	Sp2(0.24), Sec24b(0.17), Kdm6a(0.07), Foxp1(0.06), Foxp1(0.06), Ndufs6(0), Apoe(-0.01), Nxn(-0.02), Wdpcp(-0.07), Ddx17(-0.08), Poglut1(-0.09), Kcnq1(-0.16), Speg(-0.21), Crb2(-0.53), Kcnj1(-1.16),
isomerase activity	0.159276	0.109969	0.100274	0.307277	103	0.328538	0.0597532	0.0137366	0.583692	0.871189	Aloxe3(1.37), Dsel(0.29), Pgm1(0.22), Fkbp1a(0.19), Ptges3(0.19), Glce(0.19), Pdia6(0.18), Ppie(0.17), Top1(0.13), Pgm2l1(0.13), Ebp(0.12), Mif(0.12), Pmm1(0.12), Ptges(0.12), Ppil4(0.12), Hyi(0.12), Fkbp2(0.1), Ppid(0.1), Itpk1(0.1), Ppig(0.1), Ppic(0.09), Mri1(0.09), Eci3(0.09), Pus7l(0.09), Trub2(0.09), Rpia(0.08), Gale(0.08), Dkc1(0.08), Ppia(0.08), Pdia3(0.07), Cwc27(0.07), Pgm3(0.07), Fkbp5…
negative regulation of growth of symbiont in host	0.220441	0.277909	0.100312	0.307277	11	0.460551	0.382579	0.200181	0.108491	0.348885	Tirap(0.3), Sqstm1(0.23), Myd88(0.18), Tlr2(-0.01), Cd36(-0.02), Irf8(-0.09), Nod2(-0.14), Lbp(-0.24), Tnf(-0.26), Mbl1(-0.55), Scd1(-0.74),
Wnt-activated receptor activity	0.139382	0.256745	0.10092	0.308604	23	0.0568941	0.73835	0.918812	0.0194658	0.106926	Sfrp2(0.38), Fzd2(0.27), Fzd2(0.27), Fzd3(0.21), Fzd5(0.18), Fzd6(0.18), Fzd6(0.18), Fzd8(0.08), Ryk(0.06), Ryk(0.06), Lrp6(-0.05), Fzd1(-0.07), Fzd1(-0.07), Fzd9(-0.12), Fzd9(-0.12), Frzb(-0.12), Fzd4(-0.13), Fzd4(-0.13), Lrp5(-0.14), Fzd7(-0.25), Egf(-0.47), Sfrp1(-0.67), Sfrp4(-1.09),
transport vesicle	0.197789	0.15743	0.102661	0.310799	38	0.177413	0.384601	0.0586993	0.327484	0.655159	Chp1(0.2), Crispld2(0.19), Rab11a(0.18), Fgfrl1(0.17), Sipa1(0.14), Bloc1s5(0.11), Stx2(0.09), Bloc1s3(0.08), Aqp2(0.06), Ankrd27(0.05), Tmem168(0.04), Yipf3(0.03), Plekhf2(0.02), Scamp2(0.01), Erp29(0.01), Cav2(0), Aph1b(0), Ap1ar(0), Pigr(-0.03), Bloc1s6(-0.04), Bloc1s6(-0.04), Rab14(-0.05), Yipf1(-0.05), Fgfr4(-0.06), Atp13a2(-0.07), Galnt15(-0.07), Atp2c1(-0.07), Azin2(-0.08), Ap1g2(-0.09), C…
inositol-1,3,4-trisphosphate 4-phosphatase activity	0.195471	0.215245	0.102867	0.310799	21	0.539691	0.0648865	0.386746	0.0719203	0.631305	Mtmr14(0.21), Dusp11(0.11), Nt5dc3(0.11), Nt5c(0.1), Ptpdc1(0.09), Ctdspl2(0.08), Phpt1(0.01), Mtmr6(0.01), Mdp1(0), Tns2(0), Sgpp2(-0.01), Plpp6(-0.02), Sacm1l(-0.06), Nt5m(-0.07), Pxylp1(-0.07), Mtmr7(-0.11), Nt5dc1(-0.11), Fig4(-0.17), Lhpp(-0.2), Epm2a(-0.24), Sgpp1(-0.26),
NADP phosphatase activity	0.195471	0.215245	0.102867	0.310799	21	0.539691	0.0648865	0.386746	0.0719203	0.631305	Mtmr14(0.21), Dusp11(0.11), Nt5dc3(0.11), Nt5c(0.1), Ptpdc1(0.09), Ctdspl2(0.08), Phpt1(0.01), Mtmr6(0.01), Mdp1(0), Tns2(0), Sgpp2(-0.01), Plpp6(-0.02), Sacm1l(-0.06), Nt5m(-0.07), Pxylp1(-0.07), Mtmr7(-0.11), Nt5dc1(-0.11), Fig4(-0.17), Lhpp(-0.2), Epm2a(-0.24), Sgpp1(-0.26),
transmembrane receptor protein phosphatase activity	0.195471	0.215245	0.102867	0.310799	21	0.539691	0.0648865	0.386746	0.0719203	0.631305	Mtmr14(0.21), Dusp11(0.11), Nt5dc3(0.11), Nt5c(0.1), Ptpdc1(0.09), Ctdspl2(0.08), Phpt1(0.01), Mtmr6(0.01), Mdp1(0), Tns2(0), Sgpp2(-0.01), Plpp6(-0.02), Sacm1l(-0.06), Nt5m(-0.07), Pxylp1(-0.07), Mtmr7(-0.11), Nt5dc1(-0.11), Fig4(-0.17), Lhpp(-0.2), Epm2a(-0.24), Sgpp1(-0.26),
5-amino-6-(5-phosphoribitylamino)uracil phosphatase activity	0.195471	0.215245	0.102867	0.310799	21	0.539691	0.0648865	0.386746	0.0719203	0.631305	Mtmr14(0.21), Dusp11(0.11), Nt5dc3(0.11), Nt5c(0.1), Ptpdc1(0.09), Ctdspl2(0.08), Phpt1(0.01), Mtmr6(0.01), Mdp1(0), Tns2(0), Sgpp2(-0.01), Plpp6(-0.02), Sacm1l(-0.06), Nt5m(-0.07), Pxylp1(-0.07), Mtmr7(-0.11), Nt5dc1(-0.11), Fig4(-0.17), Lhpp(-0.2), Epm2a(-0.24), Sgpp1(-0.26),
phosphatidylinositol-3,5-bisphosphate 5-phosphatase activity	0.195471	0.215245	0.102867	0.310799	21	0.539691	0.0648865	0.386746	0.0719203	0.631305	Mtmr14(0.21), Dusp11(0.11), Nt5dc3(0.11), Nt5c(0.1), Ptpdc1(0.09), Ctdspl2(0.08), Phpt1(0.01), Mtmr6(0.01), Mdp1(0), Tns2(0), Sgpp2(-0.01), Plpp6(-0.02), Sacm1l(-0.06), Nt5m(-0.07), Pxylp1(-0.07), Mtmr7(-0.11), Nt5dc1(-0.11), Fig4(-0.17), Lhpp(-0.2), Epm2a(-0.24), Sgpp1(-0.26),
inositol-1,3,4,5,6-pentakisphosphate 1-phosphatase activity	0.195471	0.215245	0.102867	0.310799	21	0.539691	0.0648865	0.386746	0.0719203	0.631305	Mtmr14(0.21), Dusp11(0.11), Nt5dc3(0.11), Nt5c(0.1), Ptpdc1(0.09), Ctdspl2(0.08), Phpt1(0.01), Mtmr6(0.01), Mdp1(0), Tns2(0), Sgpp2(-0.01), Plpp6(-0.02), Sacm1l(-0.06), Nt5m(-0.07), Pxylp1(-0.07), Mtmr7(-0.11), Nt5dc1(-0.11), Fig4(-0.17), Lhpp(-0.2), Epm2a(-0.24), Sgpp1(-0.26),
inositol-3,4-bisphosphate 4-phosphatase activity	0.195471	0.215245	0.102867	0.310799	21	0.539691	0.0648865	0.386746	0.0719203	0.631305	Mtmr14(0.21), Dusp11(0.11), Nt5dc3(0.11), Nt5c(0.1), Ptpdc1(0.09), Ctdspl2(0.08), Phpt1(0.01), Mtmr6(0.01), Mdp1(0), Tns2(0), Sgpp2(-0.01), Plpp6(-0.02), Sacm1l(-0.06), Nt5m(-0.07), Pxylp1(-0.07), Mtmr7(-0.11), Nt5dc1(-0.11), Fig4(-0.17), Lhpp(-0.2), Epm2a(-0.24), Sgpp1(-0.26),
inositol-1,3,4-trisphosphate 1-phosphatase activity	0.195471	0.215245	0.102867	0.310799	21	0.539691	0.0648865	0.386746	0.0719203	0.631305	Mtmr14(0.21), Dusp11(0.11), Nt5dc3(0.11), Nt5c(0.1), Ptpdc1(0.09), Ctdspl2(0.08), Phpt1(0.01), Mtmr6(0.01), Mdp1(0), Tns2(0), Sgpp2(-0.01), Plpp6(-0.02), Sacm1l(-0.06), Nt5m(-0.07), Pxylp1(-0.07), Mtmr7(-0.11), Nt5dc1(-0.11), Fig4(-0.17), Lhpp(-0.2), Epm2a(-0.24), Sgpp1(-0.26),
inositol-1,3,4,6-tetrakisphosphate 6-phosphatase activity	0.195471	0.215245	0.102867	0.310799	21	0.539691	0.0648865	0.386746	0.0719203	0.631305	Mtmr14(0.21), Dusp11(0.11), Nt5dc3(0.11), Nt5c(0.1), Ptpdc1(0.09), Ctdspl2(0.08), Phpt1(0.01), Mtmr6(0.01), Mdp1(0), Tns2(0), Sgpp2(-0.01), Plpp6(-0.02), Sacm1l(-0.06), Nt5m(-0.07), Pxylp1(-0.07), Mtmr7(-0.11), Nt5dc1(-0.11), Fig4(-0.17), Lhpp(-0.2), Epm2a(-0.24), Sgpp1(-0.26),
inositol-1,3,4,6-tetrakisphosphate 1-phosphatase activity	0.195471	0.215245	0.102867	0.310799	21	0.539691	0.0648865	0.386746	0.0719203	0.631305	Mtmr14(0.21), Dusp11(0.11), Nt5dc3(0.11), Nt5c(0.1), Ptpdc1(0.09), Ctdspl2(0.08), Phpt1(0.01), Mtmr6(0.01), Mdp1(0), Tns2(0), Sgpp2(-0.01), Plpp6(-0.02), Sacm1l(-0.06), Nt5m(-0.07), Pxylp1(-0.07), Mtmr7(-0.11), Nt5dc1(-0.11), Fig4(-0.17), Lhpp(-0.2), Epm2a(-0.24), Sgpp1(-0.26),
phosphatidylinositol-1,4,5-trisphosphate 5-phosphatase activity	0.195471	0.215245	0.102867	0.310799	21	0.539691	0.0648865	0.386746	0.0719203	0.631305	Mtmr14(0.21), Dusp11(0.11), Nt5dc3(0.11), Nt5c(0.1), Ptpdc1(0.09), Ctdspl2(0.08), Phpt1(0.01), Mtmr6(0.01), Mdp1(0), Tns2(0), Sgpp2(-0.01), Plpp6(-0.02), Sacm1l(-0.06), Nt5m(-0.07), Pxylp1(-0.07), Mtmr7(-0.11), Nt5dc1(-0.11), Fig4(-0.17), Lhpp(-0.2), Epm2a(-0.24), Sgpp1(-0.26),
IDP phosphatase activity	0.195471	0.215245	0.102867	0.310799	21	0.539691	0.0648865	0.386746	0.0719203	0.631305	Mtmr14(0.21), Dusp11(0.11), Nt5dc3(0.11), Nt5c(0.1), Ptpdc1(0.09), Ctdspl2(0.08), Phpt1(0.01), Mtmr6(0.01), Mdp1(0), Tns2(0), Sgpp2(-0.01), Plpp6(-0.02), Sacm1l(-0.06), Nt5m(-0.07), Pxylp1(-0.07), Mtmr7(-0.11), Nt5dc1(-0.11), Fig4(-0.17), Lhpp(-0.2), Epm2a(-0.24), Sgpp1(-0.26),
mannose binding	0.236187	0.252958	0.103501	0.312123	14	0.21049	0.0955655	0.410406	0.28846	0.529801	Dpm1(0.18), Mrc1(0.14), Cln5(0.08), M6pr(0.03), Lman2(-0.02), Lman2(-0.02), Bsg(-0.03), Igf2r(-0.04), Lman2l(-0.04), Man2b1(-0.06), Lman1(-0.1), Manba(-0.24), Mbl1(-0.55), Mbl1(-0.55),
positive regulation of glycogen biosynthetic process	0.198093	0.279218	0.103572	0.312123	11	0.279389	0.0724125	0.289712	0.573678	0.341081	Irs2(0.33), Igf2(0.15), Akt1(0.11), Akt2(0.03), Dyrk2(-0.04), Epm2aip1(-0.09), Insr(-0.11), Insr(-0.11), Sorbs1(-0.11), Irs1(-0.24), Igf1(-0.87),
dopamine metabolic process	0.202971	0.281937	0.103659	0.312123	12	0.322036	0.161483	0.0954738	0.868805	0.11856	Nr4a2(0.32), Hprt(0.22), Rnls(0.21), Snca(0.05), Sncaip(0), Spr(-0.04), Cyp2d22(-0.11), Comt(-0.23), Comt(-0.23), Npr1(-0.24), Atp7a(-0.32), Park2(-0.42),
embryonic forelimb morphogenesis	0.174446	0.195278	0.104308	0.313812	28	0.371095	0.783357	0.306681	0.372854	0.00741253	Wnt7a(0.22), Wnt7a(0.22), Wnt7a(0.22), Tfap2a(0.18), Rdh10(0.11), Wnt9a(0.1), Lnpk1(0.09), Twist1(0.07), Nipbl(0.05), Hoxa9(0.03), Runx2(0), Ctnnb1(-0.03), Hoxd11(-0.03), Hoxa11(-0.04), Lrp6(-0.05), Lrp6(-0.05), Cacna1c(-0.07), Tbx3(-0.08), Ift122(-0.08), Hoxd9(-0.09), Hoxd9(-0.09), Osr2(-0.11), Osr2(-0.11), Rpgrip1l(-0.19), Reck(-0.28), Mecom(-0.31), Aldh1a2(-0.33), Osr1(-0.42),
ATP-dependent helicase activity	0.163202	0.209838	0.106764	0.320111	25	0.620057	0.0188751	0.356803	0.296672	0.456778	Chd5(0.32), Ighmbp2(0.19), Dhx40(0.17), Ttf2(0.11), Dhx8(0.11), Dhx33(0.07), Dhx15(0.05), Dhx30(0.02), Ercc2(-0.01), Dhx36(-0.02), Ddx11(-0.02), Chd4(-0.03), Ddx1(-0.05), Ercc6l2(-0.06), Rtel1(-0.06), Blm(-0.07), Recql5(-0.07), Dhx29(-0.11), Snrnp200(-0.13), Chd6(-0.14), Recql4(-0.14), Recql(-0.16), Wrn(-0.19), Brip1(-0.24), Dhx9(-0.31),
actin filament bundle assembly	0.161619	0.172205	0.107629	0.322432	34	0.380818	0.525445	0.272485	0.78704	0.00324066	Gas7(0.38), Actn1(0.3), Ezr(0.23), Abl2(0.22), Baiap2l1(0.22), Swap70(0.21), Shroom1(0.2), Fscn1(0.18), Fscn1(0.18), Pls3(0.15), Pawr(0.14), Cdc42(0.12), Myo1b(0.07), Coro1b(0.07), Cald1(0.02), Add2(-0.02), Lima1(-0.04), Rhod(-0.05), Actn4(-0.09), Dpysl3(-0.1), Add1(-0.14), Baiap2l2(-0.14), Lcp1(-0.16), Lcp1(-0.16), Pls1(-0.17), Eps8(-0.22), Eps8(-0.22), Eps8(-0.22), Espn(-0.24), Baiap2(-0.33), B…
inositol-polyphosphate 5-phosphatase activity	0.21572	0.270642	0.107819	0.322728	10	0.417835	0.280645	0.29771	0.612613	0.0413267	Inpp5d(0.29), Inppl1(0.05), Inpp5a(0.02), Inpp5a(0.02), Sec16a(0.01), Inpp5e(-0.07), Synj2(-0.08), Inpp5k(-0.15), Inpp5b(-0.24), Inpp5j(-0.58),
iron ion transport	0.241575	0.243749	0.10797	0.322906	16	0.152076	0.400804	0.172355	0.600421	0.212551	Slc39a14(0.43), Trf(0.37), Fth1(0.3), Slc11a1(0.21), Slc11a1(0.21), B2m(0.04), Ireb2(0.01), Slc40a1(-0.09), Nectin1(-0.11), Heph(-0.12), Heph(-0.12), Steap3(-0.13), Sfxn1(-0.23), Sfxn1(-0.23), Slc11a2(-0.24), Slc11a2(-0.24),
[truncated: 619 more rows]
