# Supplementary material for: CXCL12 and MYC control energy metabolism to support adaptive responses after kidney injury
Source: Nat Commun. 2018 Sep 10;9:3660. doi: 10.1038/s41467-018-06094-4 (PMC6131511; doi:10.1038/s41467-018-06094-4)
Supplement: Supplementary file 6 — Supplementary Data 3 [file 41467_2018_6094_MOESM6_ESM.xlsx]

## Sheet: Up
Supplementary Data 3. Up-regulated gene ontology (GO) enrichment terms, comparing Myc KO and control mice.	p.geomean	stat.mean	p.val	q.val	set.size	15926.ReadsPerGene.out	15928.ReadsPerGene.out	15943.ReadsPerGene.out	15950.ReadsPerGene.out	15955.ReadsPerGene.out	Genes
cell adhesion	3.6128e-16	0.211153	7.59111e-55	2.68573e-51	354	1.17633e-05	2.54127e-09	6.47639e-17	1.03467e-18	8.13173e-15	Has2(1.55), Cd33(1.06), Igsf9b(1.05), Has1(0.96), Col6a6(0.93), Clstn3(0.92), Tnc(0.86), Sele(0.85), Cdh6(0.83), Csf3r(0.82), Chl1(0.81), Sell(0.76), Selp(0.72), Thbs1(0.72), Cd84(0.69), Bmx(0.67), Dsc2(0.67), Itgb3(0.67), Cd93(0.66), Celsr3(0.66), Stab2(0.64), Lamc2(0.63), Amica1(0.62), Col13a1(0.6), Lyve1(0.6), Cdh5(0.59), Tnfaip6(0.59), Gpnmb(0.57), Emilin2(0.57), Col12a1(0.56), Itgav(0.53), A…
G-protein coupled receptor signaling pathway	9.21488e-14	0.224185	5.84245e-53	1.03353e-49	288	7.35967e-06	5.4364e-10	1.84168e-15	1.34776e-16	8.62084e-15	Cxcl5(1.3), Rgs18(1.29), Cxcl3(1.29), Ppbp(1.22), Cxcr2(1.09), P2ry10(1.06), Fpr1(0.97), Bdkrb2(0.92), Ptger2(0.89), Cxcr4(0.86), Hcar2(0.86), Rgs16(0.83), Rgs16(0.83), Ccl11(0.83), Ccl6(0.82), C5ar2(0.8), P2ry12(0.74), Sstr4(0.71), Pf4(0.71), Drd1(0.69), Drd1(0.69), Adra1d(0.66), Rgs1(0.66), Rgs1(0.66), Ffar4(0.66), Ffar4(0.66), Celsr3(0.66), Htr1b(0.65), Gpr35(0.65), C5ar1(0.63), Fpr2(0.63), Sy…
protein serine/threonine kinase activity	9.40885e-12	0.163229	2.62289e-48	2.82994e-45	468	4.1142e-10	2.78411e-12	4.22898e-11	6.80732e-09	9.90439e-14	Pak3(0.97), Trpm6(0.83), Prkg1(0.72), Plk2(0.7), Plk2(0.7), Bub1b(0.69), Nek5(0.67), Pim1(0.63), Pim1(0.63), Syk(0.63), Aatk(0.62), Cit(0.6), Plk3(0.58), Plk3(0.58), Ttn(0.57), Map2k6(0.55), Camk4(0.54), Cdk17(0.53), Phkg1(0.52), Clk1(0.48), Clk1(0.48), Map3k8(0.48), Stk17b(0.48), Stk17b(0.48), Trio(0.48), Tnik(0.47), Prkcq(0.46), Hipk2(0.42), Hipk2(0.42), Prkch(0.42), Map4k4(0.42), Map4k4(0.42),…
inflammatory response	1.84054e-13	0.24139	3.19948e-48	2.82994e-45	240	5.86739e-06	3.28001e-07	1.07882e-11	8.84281e-14	4.34358e-20	Cxcl5(1.3), Cxcl5(1.3), Cxcl3(1.29), Cxcl3(1.29), Il6(1.24), Ptgs2(1.16), Acod1(1.12), Gal(1.01), Fpr1(0.97), Mefv(0.9), Ptger2(0.89), Tlr6(0.88), Sele(0.85), Ccl11(0.83), Mmp25(0.83), Ccl6(0.82), C5ar2(0.8), S100a9(0.76), Nlrp6(0.76), Il1f6(0.75), S100a8(0.74), Selp(0.72), Thbs1(0.72), Thbs1(0.72), Aim2(0.72), Adam8(0.71), Chil1(0.71), Pf4(0.71), Tlr8(0.71), Havcr2(0.71), Il1b(0.69), Nfkbid(0.67…
positive regulation of cell proliferation	1.43032e-11	0.166792	7.05435e-46	4.99166e-43	428	4.06741e-06	1.07304e-10	1.42927e-11	1.17273e-12	2.87236e-13	Has2(1.55), Il6(1.24), Lif(1.22), Lif(1.22), Ptgs2(1.16), Gdnf(1.1), Cxcr2(1.09), Atf3(0.99), Nog(0.96), Ntrk2(0.94), Il11(0.9), Il11(0.9), Tnc(0.86), Ereg(0.79), Ereg(0.79), Csf3(0.76), Csf3(0.76), Prok1(0.74), Jun(0.69), Osm(0.69), Pgf(0.69), Pgr(0.66), Notch1(0.64), Notch1(0.64), Mycn(0.63), Cntfr(0.62), Nmb(0.6), S1pr1(0.59), Insl3(0.57), Sox11(0.57), Egf(0.56), Egf(0.56), Egf(0.56), Ptger4(0…
sequence-specific DNA binding	1.35831e-11	0.157427	1.50533e-44	8.8764e-42	469	0.000154752	6.69301e-10	7.23334e-13	6.66889e-12	7.60082e-15	Fosb(1.12), Atf3(0.99), Nr4a3(0.99), Nr5a2(0.93), Nr4a2(0.91), Nr4a2(0.91), Nr1d1(0.89), Fos(0.83), Nfe2(0.82), Csrnp1(0.78), Gata5(0.71), Jun(0.69), Zfhx3(0.67), Foxj1(0.67), Pgr(0.66), Rel(0.66), Notch1(0.64), Sox7(0.62), Ikzf3(0.61), Fosl2(0.6), Hivep3(0.59), Nr4a1(0.58), Hoxc11(0.58), Prdm1(0.57), Dbp(0.57), Foxf1(0.56), Foxq1(0.55), Nfil3(0.54), Junb(0.5), Etv4(0.5), Tead4(0.5), Tfap2a(0.49)…
cell surface	6.05351e-14	0.171411	7.00788e-43	3.54198e-40	494	0.00176232	5.32917e-06	1.46678e-19	7.4843e-17	8.06778e-10	Cd80(1.41), Cxcr2(1.09), Ntrk2(0.94), Clstn3(0.92), Tnfsf18(0.92), Slc4a1(0.91), Islr2(0.87), Cxcr4(0.86), Cxcr4(0.86), Mmp25(0.83), Treml2(0.82), Tpbg(0.81), Thbd(0.8), Sell(0.76), Sell(0.76), P2ry12(0.74), Adamts9(0.74), Thbs1(0.72), Adam8(0.71), Havcr2(0.71), Havcr2(0.71), Itgb3(0.67), Itgb3(0.67), Cd93(0.66), Hbegf(0.64), Notch1(0.64), C5ar1(0.63), Trf(0.61), Cdh5(0.59), Cd53(0.58), Pla2r1(0.…
protein kinase activity	1.26823e-10	0.151066	2.56466e-42	1.13422e-39	484	3.15679e-08	4.32617e-10	2.73694e-10	1.17624e-08	9.67321e-13	Pak3(0.97), Pak3(0.97), Ntrk2(0.94), Rnasel(0.8), Prkg1(0.72), Plk2(0.7), Bub1b(0.69), Ephb3(0.69), Itk(0.68), Bmx(0.67), Musk(0.67), Nek5(0.67), Syk(0.63), Aatk(0.62), Cit(0.6), Plk3(0.58), Map2k6(0.55), Camk4(0.54), Cdk17(0.53), Phkg1(0.52), Kdr(0.51), Ret(0.51), Flt1(0.5), Clk1(0.48), Map3k8(0.48), Stk17b(0.48), Trio(0.48), Mst1r(0.47), Rassf2(0.47), Tnik(0.47), Epha3(0.46), Prkcq(0.46), Hipk2…
intracellular signal transduction	1.03752e-10	0.178044	4.50423e-42	1.77066e-39	344	4.13698e-06	3.72489e-09	1.39911e-12	3.40367e-10	2.96735e-12	Socs3(0.85), Itk(0.68), Nrgn(0.68), Bmx(0.67), Plek(0.65), Syk(0.63), Syk(0.63), Rapgef4(0.63), Asb4(0.61), Cit(0.6), Rgs9(0.58), Dusp1(0.57), Pag1(0.56), Pag1(0.56), Camk4(0.54), Rgs7(0.54), Edn1(0.53), Nfam1(0.53), Nfam1(0.53), Akap13(0.48), Stk17b(0.48), Adcy1(0.48), Stac(0.47), Tnik(0.47), Prkcq(0.46), Prkcq(0.46), Sh2b2(0.46), Sh2b2(0.46), Socs5(0.44), Spsb1(0.44), Akap6(0.44), Prkch(0.42), …
proteinaceous extracellular matrix	4.83194e-13	0.253658	1.39502e-41	4.93559e-39	207	0.000517179	1.73991e-07	1.32136e-14	1.49294e-16	1.54867e-09	Mmp8(1.13), Wnt9b(1), Adamts4(0.97), Col6a6(0.93), Tnc(0.86), Col11a2(0.83), Chl1(0.81), Adamts9(0.74), Papln(0.74), Olfml2b(0.69), Col17a1(0.66), Mmp3(0.65), Lamc2(0.63), Wnt11(0.6), Mmp9(0.59), Dspp(0.59), Col24a1(0.58), Adamts1(0.57), Mmp19(0.57), Thsd4(0.57), Emilin2(0.57), Col12a1(0.56), Slit3(0.56), Impg2(0.56), Il1rl1(0.51), Hmcn2(0.51), Lama4(0.48), Thbs2(0.46), Nyx(0.46), Fgf1(0.45), Rel…
positive regulation of gene expression	1.57932e-10	0.179862	1.74038e-40	5.59768e-38	325	2.60773e-05	1.70689e-08	2.18056e-11	1.04418e-10	4.00651e-13	Il6(1.24), Il6(1.24), Lif(1.22), Inhba(1.17), Atf3(0.99), Atf3(0.99), Ntrk2(0.94), Tnc(0.86), Apob(0.76), Pf4(0.71), Il1b(0.69), Il1b(0.69), Itgb3(0.67), Musk(0.67), Lrrc32(0.64), Gja1(0.63), Mycn(0.63), Wnt11(0.6), Prdm1(0.57), Sox11(0.57), Sox11(0.57), Twist1(0.57), Vash1(0.57), Ptger4(0.55), Tlr4(0.55), Nfil3(0.54), Nfil3(0.54), Ngf(0.54), Ngf(0.54), Serpine1(0.52), Ptpn22(0.52), Ptpn22(0.52),…
chromatin binding	1.2285e-09	0.154226	1.53743e-37	4.53286e-35	413	1.76032e-06	6.67904e-09	7.97571e-08	2.10159e-11	1.04183e-10	Chd5(1.05), Nr5a2(0.93), Fos(0.83), Gata5(0.71), Jun(0.69), Rel(0.66), Notch1(0.64), Arid5a(0.61), Fosl2(0.6), Ankrd2(0.57), Atxn1(0.53), Kmt2a(0.53), Tfap2a(0.49), Zc3h12a(0.46), Tox3(0.46), Gata6(0.43), Gli3(0.43), Kdm6b(0.43), Svep1(0.42), Prdm11(0.41), Crebbp(0.4), Crebbp(0.4), Smad3(0.4), Zeb1(0.4), Zeb1(0.4), Nupr1(0.4), Tshz3(0.4), Tshz3(0.4), Elk4(0.39), Rest(0.39), Hdgfrp3(0.39), Esr1(0.…
cell migration	8.55682e-10	0.231098	9.99059e-37	2.71898e-34	182	1.86431e-05	6.27001e-08	8.51138e-11	4.17392e-09	1.70446e-11	Trem1(1.06), Cxcr4(0.86), Arc(0.81), Thbs1(0.72), Sstr4(0.71), Ephb3(0.69), Ephb3(0.69), Itgb3(0.67), Gfra1(0.65), Fam83d(0.65), Ang(0.64), Hbegf(0.64), S1pr1(0.59), Itgav(0.53), Srgap1(0.53), Kdr(0.51), Flt1(0.5), Flt1(0.5), Flt1(0.5), Cd44(0.49), Efnb2(0.48), Epha3(0.46), Mmp14(0.45), Reln(0.45), Ccdc88a(0.43), Lama5(0.42), Epha2(0.41), St14(0.41), Sdc1(0.39), Emp2(0.38), Lamb1(0.38), Podxl(0.3…
protein tyrosine kinase activity	3.4094e-09	0.268293	2.33041e-35	5.88927e-33	127	1.21362e-05	3.36967e-07	1.60028e-10	5.48073e-10	7.25537e-10	Ntrk2(0.94), Ephb3(0.69), Itk(0.68), Bmx(0.67), Musk(0.67), Syk(0.63), Syk(0.63), Syk(0.63), Aatk(0.62), Ttn(0.57), Egf(0.56), Map2k6(0.55), Kdr(0.51), Ret(0.51), Flt1(0.5), Clk1(0.48), Mst1r(0.47), Epha3(0.46), Epha2(0.41), Fes(0.41), Flt4(0.38), Ddr2(0.38), Btk(0.37), Btk(0.37), Clk4(0.37), Fyn(0.37), Fyn(0.37), Fyn(0.37), Fgfr1(0.36), Fgr(0.36), Ephb2(0.35), Ntrk3(0.35), Peak1(0.34), Igf1r(0.3…
cell-cell junction	2.05599e-09	0.222804	3.33344e-35	7.86248e-33	192	7.49648e-06	1.59806e-06	2.36545e-10	2.6933e-09	3.76272e-11	Cxcr4(0.86), Itk(0.68), Gja1(0.63), Col13a1(0.6), Cdh5(0.59), Cdh5(0.59), Cd53(0.58), Ncam1(0.52), Ahnak(0.52), Pcdhga12(0.51), Dsp(0.5), Cldn5(0.49), Itga5(0.48), Flrt3(0.45), Ptprj(0.43), Cdc42ep4(0.43), Heg1(0.43), Pcdhgc3(0.43), Prkch(0.42), Flna(0.42), Ceacam1(0.41), Tjp1(0.4), Dbn1(0.4), Dbn1(0.4), 9430020K01Rik(0.4), Kirrel(0.39), Kirrel(0.39), Cdh1(0.38), Cdh1(0.38), Ptprm(0.38), Lin7a(0.…
G-protein coupled receptor activity	5.06111e-10	0.252072	5.77925e-35	1.27794e-32	160	0.000305329	2.80793e-06	1.06308e-11	1.86449e-11	3.18859e-10	Cxcr2(1.09), P2ry10(1.06), P2ry10(1.06), Fpr1(0.97), Bdkrb2(0.92), Ptger2(0.89), Cxcr4(0.86), Hcar2(0.86), C5ar2(0.8), P2ry12(0.74), Sstr4(0.71), Drd1(0.69), Drd1(0.69), Adra1d(0.66), Ffar4(0.66), Celsr3(0.66), Htr1b(0.65), Gpr35(0.65), C5ar1(0.63), C5ar1(0.63), Fpr2(0.63), Ackr4(0.61), Ccr1(0.6), S1pr1(0.59), Ackr2(0.59), Ltb4r1(0.58), Cckar(0.56), Ptger4(0.55), Adgrg3(0.53), Gprc5a(0.51), Ednrb…
external side of plasma membrane	2.20445e-10	0.230081	1.03877e-34	2.16186e-32	194	0.0022701	1.46433e-05	8.13749e-11	4.30278e-14	4.50344e-11	Cd80(1.41), Il6(1.24), Cd33(1.06), Fcer2a(0.87), Cxcr4(0.86), Sell(0.76), P2ry12(0.74), Selp(0.72), Selp(0.72), Thbs1(0.72), Itgb3(0.67), Musk(0.67), Gfra1(0.65), Stab2(0.64), Ccr1(0.6), Cdh5(0.59), S1pr1(0.59), Tlr4(0.55), Sema7a(0.54), Itgav(0.53), Ncam1(0.52), Ncam1(0.52), Abcg1(0.51), Abcg1(0.51), Kdr(0.51), Il1rl1(0.51), Il1rl1(0.51), Il7r(0.5), Cd44(0.49), Osmr(0.49), Itga5(0.48), Vcam1(0.4…
positive regulation of cell migration	3.3889e-09	0.214891	1.32953e-32	2.61327e-30	191	0.00033616	7.28193e-06	5.92222e-10	5.75669e-10	2.82528e-11	Has2(1.55), Arhgef39(0.97), Cxcr4(0.86), Ccl11(0.83), Thbs1(0.72), Drd1(0.69), Sema3e(0.69), Itgb3(0.67), Mmp3(0.65), Hbegf(0.64), Notch1(0.64), Sema4c(0.62), Ccr1(0.6), Wnt11(0.6), S1pr1(0.59), Tnfaip6(0.59), Foxf1(0.56), Sema7a(0.54), Edn1(0.53), Itgav(0.53), Kdr(0.51), Ret(0.51), Flt1(0.5), Tfap2a(0.49), Irs2(0.49), Itga5(0.48), Hgf(0.46), Fgf1(0.45), Mmp14(0.45), Pdgfb(0.45), Pdgfb(0.45), Age…
angiogenesis	3.30756e-09	0.198297	1.0307e-31	1.91927e-29	223	0.00118789	1.38257e-06	1.83245e-09	1.9869e-11	2.60005e-09	Ptgs2(1.16), Ereg(0.79), Prok1(0.74), Adam8(0.71), Ephb3(0.69), Jun(0.69), Jun(0.69), Pgf(0.69), Sema3e(0.69), Ang(0.64), Hbegf(0.64), Notch1(0.64), Syk(0.63), S1pr1(0.59), Mmp19(0.57), Vash1(0.57), Angpt2(0.56), Egf(0.56), Thsd7a(0.55), Itgav(0.53), Kdr(0.51), Nos3(0.51), Esm1(0.51), Flt1(0.5), Flt1(0.5), Efnb2(0.48), Epas1(0.48), Zc3h12a(0.46), Fgf1(0.45), Dll4(0.44), Fzd5(0.43), Rasip1(0.43), …
actin binding	1.67891e-08	0.168453	9.98444e-30	1.76625e-27	302	9.01486e-06	4.16124e-05	2.67184e-08	1.89559e-07	5.83983e-11	Slc4a1(0.91), Mefv(0.9), Cxcr4(0.86), Add2(0.83), Arc(0.81), Myh4(0.81), Tnnt3(0.77), Avil(0.76), Crocc(0.74), Pfn3(0.71), Xirp1(0.65), Ang(0.64), Shank3(0.61), Eps8l1(0.6), Plec(0.56), Sntb1(0.55), Map1b(0.51), Nos3(0.51), Nrap(0.51), Utrn(0.5), Myrip(0.5), Synpo2(0.49), Synpo2(0.49), Tns4(0.48), Gas2l3(0.47), Dst(0.46), Marcksl1(0.45), Nos2(0.45), Macf1(0.44), Ccdc88a(0.43), Flna(0.42), Ceacam1…
transcriptional activator activity, RNA polymerase II core promoter proximal region sequence-specific binding	7.62705e-08	0.195203	1.23335e-29	2.0779e-27	204	0.000150328	5.04765e-08	6.78009e-08	2.4651e-07	1.77967e-09	Fosb(1.12), Nr4a3(0.99), Nr4a3(0.99), Nr5a2(0.93), Nr4a2(0.91), Nr4a2(0.91), Fos(0.83), Fos(0.83), Jun(0.69), Foxj1(0.67), Pgr(0.66), Akna(0.6), Nr4a1(0.58), Nr4a1(0.58), Hoxc11(0.58), Dbp(0.57), Dbp(0.57), Sox11(0.57), Sox11(0.57), Twist1(0.57), Sox4(0.54), Sox4(0.54), Junb(0.5), Tead4(0.5), Tfap2a(0.49), Tfap2a(0.49), Egr1(0.48), Egr1(0.48), Epas1(0.48), Batf(0.44), Batf(0.44), Foxd1(0.42), Nfa…
GTPase activator activity	1.72929e-07	0.167531	2.17999e-28	3.50581e-26	270	0.000228132	2.73435e-07	4.5933e-07	3.82168e-08	3.91236e-09	Rgs18(1.29), Rgs16(0.83), Rgs16(0.83), Rgs16(0.83), Jun(0.69), Rgs1(0.66), Rgs1(0.66), Stxbp5l(0.64), Sipa1l2(0.61), Wnt11(0.6), Rgs9(0.58), Rgs9(0.58), Arhgap25(0.55), Rgs7(0.54), Rgs7(0.54), Srgap1(0.53), Rgs2(0.51), Rgs2(0.51), Arhgap31(0.49), Tbc1d10c(0.49), Tbc1d9(0.48), Dlc1(0.46), Cdc42ep4(0.43), Cdc42ep3(0.43), Hmha1(0.41), Asap2(0.38), Arhgap26(0.37), Arhgef15(0.37), Rapgef2(0.36), Arap3…
protein autophosphorylation	1.1942e-07	0.194643	4.62208e-28	7.10997e-26	198	9.345e-05	4.31843e-06	1.43723e-08	6.86868e-07	2.37881e-09	Ntrk2(0.94), Ephb3(0.69), Bmx(0.67), Musk(0.67), Pim1(0.63), Pim1(0.63), Syk(0.63), Syk(0.63), Aatk(0.62), Camk4(0.54), Kdr(0.51), Flt1(0.5), Clk1(0.48), Stk17b(0.48), Tnik(0.47), Fes(0.41), Irak3(0.4), Mapk15(0.4), Tgfbr1(0.39), Myo3b(0.39), Flt4(0.38), Ddr2(0.38), Ddr2(0.38), Btk(0.37), Clk4(0.37), Fyn(0.37), Fyn(0.37), Wnk3(0.37), Fgfr1(0.36), Fgr(0.36), Prkcg(0.36), Mapkapk5(0.35), Mapkapk5(0…
positive regulation of cytosolic calcium ion concentration	2.1561e-08	0.278192	7.24989e-28	1.06875e-25	106	0.00276179	4.33314e-06	5.4191e-11	1.33265e-08	1.82189e-07	Cxcl3(1.29), Cxcr2(1.09), Fpr1(0.97), Bdkrb2(0.92), Ptger2(0.89), C5ar2(0.8), Prkg1(0.72), Il1b(0.69), Adra1d(0.66), C5ar1(0.63), C5ar1(0.63), Fpr2(0.63), Gja1(0.63), Itpr3(0.62), Cxcl2(0.62), Cxcl13(0.61), Ccr1(0.6), Nmb(0.6), Cckar(0.56), Ptger4(0.55), Edn1(0.53), Itgav(0.53), Cd38(0.52), C1qtnf1(0.52), Kdr(0.51), Cacna1c(0.5), Ednrb(0.5), Ednra(0.48), Ric3(0.42), Ptgir(0.41), Lrp6(0.38), Esr1(…
peptidyl-tyrosine phosphorylation	1.48315e-07	0.304516	1.56819e-27	2.2193e-25	78	3.47388e-05	1.60302e-06	3.13883e-07	2.02168e-07	2.07889e-08	Syk(0.63), Syk(0.63), Egf(0.56), Kdr(0.51), Flt1(0.5), Clk1(0.48), Pdgfb(0.45), Reln(0.45), Fes(0.41), Flt4(0.38), Ddr2(0.38), Btk(0.37), Btk(0.37), Clk4(0.37), Fyn(0.37), Fyn(0.37), Fyn(0.37), Fgfr1(0.36), Fgr(0.36), Fgr(0.36), Ephb2(0.35), Fgfr2(0.32), Insr(0.32), Jak2(0.31), Abl2(0.3), Abl2(0.3), Epha1(0.3), Dyrk1a(0.29), Dyrk1a(0.29), Epha4(0.29), Hk1(0.29), Jak3(0.29), Pxn(0.29), Pdgfra(0.27…
peptidyl-serine phosphorylation	4.38168e-07	0.216917	2.72949e-27	3.71421e-25	152	4.80092e-05	3.84158e-07	3.3229e-07	9.23398e-06	1.28546e-09	Plk2(0.7), Syk(0.63), Cdk5r1(0.59), Camk4(0.54), Clk1(0.48), Prkcq(0.46), Pdgfb(0.45), Hipk2(0.42), Prkch(0.42), Tgfbr1(0.39), Myo3b(0.39), Mast4(0.38), Brsk1(0.37), Prkcg(0.36), Mapkapk5(0.35), Akt3(0.35), Akt3(0.35), Ttbk2(0.33), Ttbk2(0.33), Csnk1e(0.32), Csnk1e(0.32), Mast1(0.32), Rictor(0.31), Smg1(0.31), Sgk2(0.3), Dyrk1a(0.29), Dyrk1a(0.29), Hk1(0.29), Prkx(0.29), Prkd2(0.29), Prkd2(0.29),…
calcium ion binding	4.72213e-09	0.146624	1.28263e-25	1.68072e-23	412	0.011672	3.45294e-05	1.40973e-10	1.16316e-10	6.68076e-06	Mmp8(1.13), Clstn3(0.92), Sele(0.85), Atp2a1(0.84), Cdh6(0.83), Mmp25(0.83), Thbd(0.8), Mctp1(0.8), S100a9(0.76), Ryr1(0.74), S100a8(0.74), Selp(0.72), Thbs1(0.72), Hpcal4(0.72), Adam8(0.71), Nkd2(0.68), Dsc2(0.67), Cd93(0.66), Celsr3(0.66), Mmp3(0.65), Notch1(0.64), Stab2(0.64), F10(0.62), Itpr3(0.62), Itpr3(0.62), Matn4(0.61), Cdh5(0.59), Cdk5r1(0.59), Ttn(0.57), Mmp19(0.57), Egf(0.56), Slit3(0…
negative regulation of angiogenesis	6.20095e-07	0.318537	2.04612e-25	2.58542e-23	66	0.0016533	2.18016e-05	1.26246e-07	6.37238e-10	4.87881e-07	Lif(1.22), Thbs1(0.72), Thbs1(0.72), Thbs1(0.72), Pf4(0.71), Sema3e(0.69), Ngp(0.58), Adamts1(0.57), Vash1(0.57), Vash1(0.57), Vash1(0.57), Angpt2(0.56), Sulf1(0.52), Adrb2(0.47), Thbs2(0.46), Thbs2(0.46), Epha2(0.41), Gpr4(0.41), Cxcl10(0.39), Ptprm(0.38), Col4a2(0.36), Ptn(0.36), Tcf4(0.35), Rock2(0.34), Foxc1(0.32), Pml(0.32), Pml(0.32), Hhex(0.31), Stab1(0.31), Serpinf1(0.3), Serpinf1(0.3), D…
basement membrane	1.62537e-08	0.276698	7.75774e-25	9.46444e-23	105	0.0330243	4.73551e-06	7.04307e-10	7.69195e-08	6.0597e-08	Tnc(0.86), Papln(0.74), Col17a1(0.66), Lamc2(0.63), Trf(0.61), Adamts1(0.57), Hmcn2(0.51), Lama4(0.48), Lama4(0.48), Efna5(0.46), Thbs2(0.46), Timp1(0.45), Runx1(0.44), Lama5(0.42), Lama5(0.42), Vwa1(0.41), Fn1(0.4), Fn1(0.4), Hspg2(0.4), Itgb4(0.4), Lama2(0.38), Lama2(0.38), Lamb1(0.38), Lamb1(0.38), Col4a2(0.36), Lamb2(0.36), Lamb2(0.36), Ptn(0.36), Lamc1(0.36), Lamc1(0.36), Nid1(0.35), Nid1(0.…
neuron projection	1.19547e-06	0.14015	9.81593e-25	1.15763e-22	338	6.76961e-05	7.60059e-06	1.49289e-08	2.67262e-06	2.38309e-06	Ptgs2(1.16), Ptgs2(1.16), Chrnb4(0.9), Kcnc2(0.86), Fos(0.83), Avil(0.76), Ank1(0.73), Slc6a12(0.73), Nptx1(0.73), Sstr4(0.71), Pgr(0.66), Shank3(0.61), Nmb(0.6), Arg1(0.57), Unc5c(0.55), Bsn(0.54), Gnao1(0.53), Tenm2(0.52), Tenm2(0.52), Kdr(0.51), Rgs2(0.51), Tenm3(0.51), Syt5(0.48), Npy(0.48), Entpd1(0.47), Map2(0.47), Map2(0.47), Vgf(0.47), Reln(0.45), Casp4(0.43), Ric3(0.42), Trpm2(0.39), Kal…
axon guidance	1.73771e-07	0.242109	2.35099e-24	2.68316e-22	123	0.0228271	2.78589e-05	2.68866e-10	7.65216e-09	1.1507e-06	Nr4a3(0.99), Nog(0.96), Chl1(0.81), Ephb3(0.69), Ephb3(0.69), Klf7(0.64), Cdk5r1(0.59), Slit3(0.56), Slit3(0.56), Crmp1(0.55), Unc5c(0.55), Plxna4(0.54), Efnb2(0.48), Unc5a(0.48), Efna5(0.46), Efna5(0.46), Reln(0.45), Flrt3(0.45), Flrt3(0.45), Gli3(0.43), Foxd1(0.42), Sema3a(0.42), Sema3a(0.42), Sema3a(0.42), Sema3f(0.39), Sema3f(0.39), Lama2(0.38), Nrp2(0.38), Lamb2(0.36), Robo3(0.36), Robo3(0.3…
positive regulation of ERK1 and ERK2 cascade	1.56474e-06	0.206657	7.93858e-24	8.7771e-22	150	0.00237615	2.00038e-05	2.05744e-06	1.04398e-08	9.40334e-08	Il6(1.24), Ccl11(0.83), Ccl6(0.82), C5ar2(0.8), Chil1(0.71), Havcr2(0.71), Il1b(0.69), Jun(0.69), Itgb3(0.67), Ffar4(0.66), C5ar1(0.63), Ccr1(0.6), Bmper(0.59), Ccl7(0.56), Ccl20(0.55), Tlr4(0.55), Sema7a(0.54), Sema7a(0.54), Ptpn22(0.52), Ptpn22(0.52), Kdr(0.51), Glipr2(0.5), Cd44(0.49), Cd44(0.49), Ednra(0.48), Cflar(0.45), Pdgfb(0.45), Pdgfb(0.45), Spry2(0.44), Mt3(0.4), Nod2(0.4), Nod2(0.4), …
regulation of cell proliferation	6.72594e-07	0.18597	1.16604e-23	1.25014e-21	193	0.00149969	0.000376609	3.62131e-07	4.94332e-08	8.23508e-09	Cxcl5(1.3), Cxcl3(1.29), Il6(1.24), Ppbp(1.22), Ptgs2(1.16), Nr5a2(0.93), Ptger2(0.89), Tnc(0.86), Pf4(0.71), Pf4(0.71), Itk(0.68), Bmx(0.67), Notch1(0.64), Notch1(0.64), Cxcl2(0.62), Cxcl13(0.61), Prdm1(0.57), Jag1(0.55), Jag1(0.55), Serpine1(0.52), Junb(0.5), Prg4(0.49), Nos2(0.45), Spry2(0.44), Gli3(0.43), Il4ra(0.43), Mmp7(0.43), Ccdc88a(0.43), Lama5(0.42), Fes(0.41), Fes(0.41), Sfrp2(0.4), S…
transforming growth factor beta receptor signaling pathway	9.44211e-07	0.272064	2.22205e-23	2.31224e-21	88	0.00123395	2.69851e-06	6.72839e-06	4.40942e-08	6.34977e-07	Gdnf(1.1), Fos(0.83), Jun(0.69), Cdh5(0.59), Cldn5(0.49), Hipk2(0.42), Smad7(0.41), Smad3(0.4), Smad3(0.4), Smad3(0.4), Tgfbr1(0.39), Tgfbr1(0.39), Tgfbr1(0.39), Tgfbr1(0.39), Gcnt2(0.38), Gcnt2(0.38), Smad6(0.36), Bmp2(0.34), Fermt2(0.34), Skil(0.33), Tgfbr3(0.33), Tgfbr3(0.33), Pml(0.32), Tgfb3(0.3), Tgfb3(0.3), Bambi(0.3), Pxn(0.29), Pxn(0.29), Tgfb1(0.28), Tgfb1(0.28), Col3a1(0.27), Cited2(0.…
heart development	9.73859e-07	0.177553	2.57336e-23	2.53492e-21	208	0.0194371	1.60943e-06	3.78111e-08	6.29171e-07	1.34314e-07	Gata5(0.71), Foxj1(0.67), Xirp1(0.65), Notch1(0.64), Gja1(0.63), Mmp9(0.59), Ttn(0.57), Sh3pxd2b(0.57), Sh3pxd2b(0.57), Foxf1(0.56), Sox4(0.54), Edn1(0.53), Cacna1c(0.5), Ednra(0.48), Akap13(0.48), Vcam1(0.47), Pdgfb(0.45), Flrt3(0.45), Lox(0.44), Gli3(0.43), Ptprj(0.43), Heg1(0.43), Heg1(0.43), Vcan(0.4), Adam19(0.39), Id3(0.39), Tgfbr1(0.39), Nrp2(0.38), Gjc1(0.37), Stra6(0.37), Myocd(0.37), Ec…
cytokine activity	8.87186e-07	0.241757	2.57935e-23	2.53492e-21	114	0.000492393	9.72317e-06	5.6658e-05	1.24603e-06	1.3073e-09	Cxcl5(1.3), Cxcl3(1.29), Il6(1.24), Il6(1.24), Lif(1.22), Lif(1.22), Inhba(1.17), Inhba(1.17), Tnfsf14(1.09), Tnfsf18(0.92), Il11(0.9), Ccl11(0.83), Ccl6(0.82), Inhbb(0.79), Csf3(0.76), Csf3(0.76), Csf3(0.76), Il1f6(0.75), Tnfsf15(0.72), Pf4(0.71), Il1b(0.69), Il1b(0.69), Osm(0.69), Osm(0.69), Il1rn(0.62), Cxcl2(0.62), Cxcl13(0.61), Ccl7(0.56), Ccl20(0.55), Edn1(0.53), Il1f9(0.47), Timp1(0.45), I…
actin cytoskeleton organization	6.05172e-07	0.211606	3.89868e-23	3.72798e-21	143	5.69655e-05	0.000477558	2.91136e-07	1.1481e-05	1.05295e-08	Pak3(0.97), Pfn3(0.71), Foxj1(0.67), Xirp1(0.65), Nrap(0.51), Gas2l3(0.47), Sh2b2(0.46), Sh2b2(0.46), Dlc1(0.46), Pdgfb(0.45), Pdgfb(0.45), Flna(0.42), Inf2(0.41), Flnb(0.41), Epb41l2(0.39), Fmnl2(0.38), Rhoj(0.38), Rhoj(0.38), Shroom3(0.37), Rhou(0.37), Arhgap26(0.37), Bcr(0.35), Arhgef17(0.35), Rock2(0.34), Abl2(0.3), Cttnbp2(0.3), Fmnl1(0.3), Pdlim7(0.3), Coro2a(0.3), Nf1(0.29), Nf1(0.29), Pdg…
heparin binding	4.86555e-07	0.242083	8.2217e-23	7.65483e-21	117	0.00172851	0.000212872	1.29489e-09	4.55693e-08	2.24182e-05	Apob(0.76), Selp(0.72), Thbs1(0.72), Pf4(0.71), Pf4(0.71), Liph(0.71), Ang(0.64), Hbegf(0.64), Hbegf(0.64), Lamc2(0.63), Cxcl13(0.61), Col13a1(0.6), Adamts1(0.57), Gpnmb(0.57), Ccl7(0.56), Slit3(0.56), Impg2(0.56), Ncam1(0.52), Thbs2(0.46), Fgf1(0.45), Itgam(0.44), Mmp7(0.43), Ager(0.42), Serpine2(0.41), Fn1(0.4), Adamts15(0.4), Cxcl10(0.39), Nrp2(0.38), Wisp1(0.38), Adamts5(0.37), Fgfr1(0.36), P…
growth factor activity	1.7136e-06	0.242217	1.34034e-22	1.21593e-20	107	0.00061807	5.18165e-05	2.10185e-07	5.0872e-08	1.21476e-05	Il6(1.24), Lif(1.22), Lif(1.22), Inhba(1.17), Gdnf(1.1), Il11(0.9), Il11(0.9), Il11(0.9), Osgin1(0.8), Osgin1(0.8), Ereg(0.79), Ereg(0.79), Inhbb(0.79), Csf3(0.76), Csf3(0.76), Prok1(0.74), Osm(0.69), Pgf(0.69), Pgf(0.69), Hbegf(0.64), Hbegf(0.64), Egf(0.56), Ngf(0.54), Hgf(0.46), Fgf1(0.45), Pdgfb(0.45), Timp1(0.45), Hdgfrp3(0.39), Areg(0.37), Areg(0.37), Kitl(0.37), Ptn(0.36), Ctgf(0.35), Thbs4…
transcriptional repressor activity, RNA polymerase II core promoter proximal region sequence-specific binding	3.67374e-06	0.229357	2.71141e-22	2.39825e-20	113	2.49502e-05	2.65006e-05	1.86732e-05	2.74723e-05	5.77095e-08	Atf3(0.99), Nr1d1(0.89), Mxd1(0.76), Bhlhe41(0.74), Prdm1(0.57), Nfil3(0.54), Nfil3(0.54), Zbtb20(0.5), Tfap2a(0.49), Tfap2a(0.49), Bach1(0.48), Hey1(0.43), Bhlhe40(0.43), Bhlhe40(0.43), Zfp281(0.42), Crebbp(0.4), Glis3(0.4), Glis3(0.4), Tshz3(0.4), Rest(0.39), Rest(0.39), Prox1(0.36), Tbx3(0.35), Skil(0.33), Skil(0.33), Ets2(0.33), Mzf1(0.32), Hhex(0.31), Ifi207(0.3), Hinfp(0.29), Tgif1(0.28), S…
RNA polymerase II core promoter proximal region sequence-specific DNA binding	1.91979e-06	0.151811	3.12886e-22	2.69998e-20	262	0.00191667	1.62779e-05	1.65906e-05	2.37148e-06	4.46336e-09	Fosb(1.12), Atf3(0.99), Nr4a3(0.99), Nr5a2(0.93), Nr4a2(0.91), Nr1d1(0.89), Fos(0.83), Mxd1(0.76), Bhlhe41(0.74), Jun(0.69), Foxj1(0.67), Pgr(0.66), Fosl2(0.6), Akna(0.6), Chd7(0.59), Hoxc11(0.58), Prdm1(0.57), Junb(0.5), Etv4(0.5), Tead4(0.5), Tfap2a(0.49), Per1(0.45), Batf(0.44), Gli3(0.43), Foxd1(0.42), Zfp281(0.42), Nfat5(0.41), Smad3(0.4), Glis3(0.4), Foxi1(0.39), Foxi1(0.39), Elf4(0.38), Es…
negative regulation of cell proliferation	1.0056e-06	0.134727	5.32325e-22	4.48421e-20	353	0.0325974	9.44073e-06	2.79059e-08	3.13022e-07	5.75905e-07	Il6(1.24), Lif(1.22), Inhba(1.17), Ptgs2(1.16), Chd5(1.05), Gal(1.01), Bdkrb2(0.92), E2f7(0.85), E2f7(0.85), Nfe2(0.82), Ereg(0.79), Sstr4(0.71), Cyp27b1(0.69), Il1b(0.69), Jun(0.69), Osm(0.69), Xirp1(0.65), Notch1(0.64), Notch1(0.64), Gja1(0.63), Sox7(0.62), Cdh5(0.59), Slfn1(0.59), Insl3(0.57), Slit3(0.56), Igfbp3(0.55), Sox4(0.54), Kmt2a(0.53), Il1rl1(0.51), Nos3(0.51), Tfap2a(0.49), Tfap2a(0.…
transmembrane receptor protein tyrosine kinase signaling pathway	4.54544e-06	0.26551	1.29981e-21	1.06947e-19	82	0.00040319	0.000117598	4.87058e-07	2.88052e-07	9.84165e-06	Gdnf(1.1), Ntrk2(0.94), Ephb3(0.69), Itk(0.68), Bmx(0.67), Gfra1(0.65), Syk(0.63), Angpt2(0.56), Pag1(0.56), Kdr(0.51), Ret(0.51), Flt1(0.5), Epha3(0.46), Epha2(0.41), Flt4(0.38), Ddr2(0.38), Btk(0.37), Fyn(0.37), Fgr(0.36), Dok2(0.35), Ephb2(0.35), Erbb3(0.35), Ntrk3(0.35), Gfra2(0.34), Dok4(0.34), Igf1r(0.33), Insr(0.32), Epha1(0.3), Epha4(0.29), Jak3(0.29), Lcp2(0.28), Ror1(0.28), Ephb6(0.27),…
nervous system development	1.89515e-06	0.14846	1.61748e-21	1.3006e-19	269	0.0534467	1.71249e-05	3.06222e-09	9.50405e-08	6.38356e-06	Gdnf(1.1), Igsf9b(1.05), Chd5(1.05), Gal(1.01), Mdga1(0.95), Ntrk2(0.94), Nr4a2(0.91), Islr2(0.87), Cxcr4(0.86), Fos(0.83), Chl1(0.81), Avil(0.76), Apob(0.76), Ephb3(0.69), Sema3e(0.69), Gfra1(0.65), Sema6d(0.65), Gas7(0.62), Sema4c(0.62), Cit(0.6), Sox11(0.57), Slit3(0.56), Crmp1(0.55), Sema7a(0.54), Plxna4(0.54), Map1b(0.51), Ret(0.51), Tfap2a(0.49), Efnb2(0.48), Nes(0.48), Tnik(0.47), Efna5(0.…
receptor complex	5.35906e-06	0.246333	2.75076e-21	2.16271e-19	94	0.00133379	6.99251e-06	7.07801e-06	9.53463e-07	2.49898e-06	Gdnf(1.1), Ntrk2(0.94), Itgb3(0.67), Musk(0.67), Gfra1(0.65), Notch1(0.64), Itpr3(0.62), Egf(0.56), Gabrb1(0.56), Pla2r1(0.56), Impg2(0.56), Ret(0.51), Flt1(0.5), Adrb2(0.47), Olr1(0.47), Lrp1(0.45), Tlr7(0.44), Il4ra(0.43), Adgrv1(0.41), Smad3(0.4), Ramp3(0.4), Itgb4(0.4), Ptprb(0.39), Tgfbr1(0.39), Tshr(0.39), Flt4(0.38), Lrp6(0.38), Kctd12b(0.38), Fgfr1(0.36), Pkd1l3(0.36), Adcyap1r1(0.35), Er…
membrane raft	1.55086e-06	0.169483	2.94621e-21	2.26602e-19	216	0.0147343	0.000576381	9.17215e-08	3.70592e-08	3.2256e-07	Mdga1(0.95), Tlr6(0.88), Sele(0.85), Rgs16(0.83), Gja1(0.63), Ltb4r1(0.58), Pag1(0.56), Pag1(0.56), Tlr4(0.55), Nfam1(0.53), Ahnak(0.52), Ahnak(0.52), Sulf1(0.52), Kdr(0.51), Nos3(0.51), Ret(0.51), Ednrb(0.5), Cbl(0.48), Ednra(0.48), Dlc1(0.46), Cflar(0.45), Dll1(0.45), Mall(0.43), Nphs1(0.41), Kcna5(0.4), Tgfbr1(0.39), Tshr(0.39), Kirrel(0.39), Emp2(0.38), Emp2(0.38), Rtn4rl2(0.38), Btk(0.37), F…
transcription regulatory region DNA binding	8.06514e-06	0.159138	6.83456e-21	5.14482e-19	223	0.000544077	1.35915e-05	4.60852e-06	1.93531e-05	8.36058e-07	Atf3(0.99), Nr5a2(0.93), Nr1d1(0.89), Fos(0.83), Gata5(0.71), Gata5(0.71), Jun(0.69), Jun(0.69), Sox7(0.62), Arid5a(0.61), Fosl2(0.6), Wnt11(0.6), Hivep3(0.59), Zfp382(0.58), Foxf1(0.56), Arid5b(0.54), Arid5b(0.54), Kmt2a(0.53), Tfap2a(0.49), Egr1(0.48), Kmt2d(0.45), Gata6(0.43), Hivep2(0.43), Zfp281(0.42), Smad7(0.41), Smad3(0.4), Foxi1(0.39), Rest(0.39), Smarca2(0.37), Egr2(0.36), Smad6(0.36), …
signal transducer activity	5.32313e-07	0.155676	1.15925e-20	8.54464e-19	270	0.0119163	6.81692e-05	6.40951e-07	8.4763e-08	2.96511e-06	Cxcr2(1.09), P2ry10(1.06), Fpr1(0.97), Bdkrb2(0.92), Ptger2(0.89), Cxcr4(0.86), Hcar2(0.86), C5ar2(0.8), P2ry12(0.74), Sstr4(0.71), Plk2(0.7), Drd1(0.69), Adra1d(0.66), Ffar4(0.66), Celsr3(0.66), Htr1b(0.65), Gpr35(0.65), C5ar1(0.63), Fpr2(0.63), Gja1(0.63), Ackr4(0.61), Ccr1(0.6), S1pr1(0.59), Ackr2(0.59), Ltb4r1(0.58), Rgs9(0.58), Cckar(0.56), Gng4(0.56), Ptger4(0.55), Rgs7(0.54), Gnao1(0.53), …
immune response	6.29806e-06	0.21165	2.81183e-20	2.03026e-18	131	0.00153912	1.37112e-05	0.000313794	7.32223e-06	1.38069e-08	Cxcl5(1.3), Cxcl3(1.29), Il6(1.24), Lif(1.22), Ppbp(1.22), Clec4e(1.14), Tnfsf14(1.09), Tnfsf18(0.92), Tlr6(0.88), Ccl11(0.83), Ccl6(0.82), Csf3(0.76), Il1f6(0.75), Tnfsf15(0.72), Slpi(0.71), Pf4(0.71), Pf4(0.71), Il1b(0.69), Osm(0.69), Cxcl2(0.62), Cxcl13(0.61), Ccr1(0.6), Ccl7(0.56), Ccl20(0.55), Nfil3(0.54), Fcamr(0.53), Prg4(0.49), Endou(0.45), Tlr7(0.44), Smad3(0.4), Sectm1b(0.4), Cxcl10(0.3…
actin cytoskeleton	6.13903e-06	0.173637	3.38529e-20	2.39543e-18	187	2.5953e-05	7.1933e-05	4.1969e-06	9.46907e-05	5.87543e-06	Nfe2(0.82), Arc(0.81), Apob(0.76), Acta1(0.74), Crocc(0.74), Cit(0.6), Slc16a3(0.59), Ahnak(0.52), Ahnak(0.52), Myrip(0.5), Synpo2(0.49), Synpo2(0.49), Akap13(0.48), Stk17b(0.48), Bmf(0.48), Gas2l3(0.47), Dst(0.46), Macf1(0.44), Cdc42ep4(0.43), Cdc42ep3(0.43), Flna(0.42), Mtap7d3(0.42), Dbn1(0.4), Dbn1(0.4), Cttnbp2nl(0.4), Epb41l2(0.39), Myh9(0.39), Cdh1(0.38), Synpo(0.38), Synpo(0.38), Fgr(0.36…
homophilic cell adhesion via plasma membrane adhesion molecules	5.45968e-06	0.296806	3.72731e-20	2.58573e-18	62	0.00537315	3.54671e-05	2.17604e-08	1.61055e-05	1.1293e-05	Igsf9b(1.05), Clstn3(0.92), Cdh6(0.83), Dsc2(0.67), Celsr3(0.66), Cdh5(0.59), Amigo2(0.53), Amigo2(0.53), Pcdh19(0.53), Ret(0.51), Tenm3(0.51), Fat2(0.51), Fat4(0.49), Pcdhgc3(0.43), Sdk2(0.42), Ceacam1(0.41), Cdh1(0.38), Ptprm(0.38), Pcdhga4(0.35), Esam(0.33), Cadm3(0.33), Cd200(0.32), Pcdhb14(0.31), Pcdhb18(0.31), Cdh13(0.3), Nectin4(0.29), Nectin2(0.28), Nectin2(0.28), Robo1(0.28), Celsr1(0.26…
transcription corepressor activity	1.03983e-05	0.186077	4.42556e-20	3.01108e-18	157	0.00017735	4.61818e-05	1.61263e-05	3.02658e-05	1.27568e-06	E2f7(0.85), E2f7(0.85), Bhlhe41(0.74), Bhlhe41(0.74), Hr(0.61), Hr(0.61), Lmcd1(0.57), Hsbp1l1(0.47), Zfp366(0.47), Zfp366(0.47), Bhlhe40(0.43), Bhlhe40(0.43), Hipk2(0.42), Hipk2(0.42), Zfp281(0.42), Sirt1(0.4), Sirt1(0.4), Ankrd1(0.4), Rybp(0.39), Nrip1(0.39), Nrip1(0.39), Prox1(0.36), Tcf4(0.35), Jazf1(0.35), Kctd1(0.34), Skil(0.33), Casp8ap2(0.32), Ccar1(0.32), Hipk1(0.31), Spen(0.31), Elk3(0.…
synapse	1.51018e-06	0.132155	7.36415e-20	4.91591e-18	340	0.106997	0.00200058	2.15741e-10	2.26957e-07	7.12772e-07	Igsf9b(1.05), Chrnb4(0.9), Kcnc2(0.86), Arc(0.81), Olfm2(0.75), Nrgn(0.68), Musk(0.67), Dok7(0.64), Sema4c(0.62), Shank3(0.61), Gabrb1(0.56), Sntb1(0.55), Unc5c(0.55), Bsn(0.54), Bsn(0.54), Psd3(0.53), Tenm2(0.52), Map1b(0.51), Plat(0.51), Cpeb4(0.51), Utrn(0.5), Myrip(0.5), Itga5(0.48), Syt5(0.48), Syt5(0.48), Tmem163(0.48), Sh2d5(0.48), Nbea(0.47), Nmnat2(0.44), Olfm3(0.42), Sdk2(0.42), Adgrv1(…
Rho guanyl-nucleotide exchange factor activity	1.56679e-05	0.276678	1.23799e-19	8.11115e-18	69	0.000931041	3.93503e-05	6.75872e-06	3.67273e-05	1.14602e-06	Arhgef39(0.97), Eps8l1(0.6), Dock11(0.5), Akap13(0.48), Akap13(0.48), Trio(0.48), Arhgef37(0.45), Arhgef38(0.43), Fgd3(0.41), Plekhg2(0.4), Fgd5(0.4), Arhgef28(0.39), Kalrn(0.39), Arhgef15(0.37), Arhgef15(0.37), Rasgrf2(0.36), Bcr(0.35), Arhgef17(0.35), Dock9(0.33), Farp1(0.33), Fgd6(0.32), Arhgef10(0.32), Tiam1(0.31), Prex2(0.31), Plekhg3(0.3), Fgd4(0.28), Itsn2(0.24), Arhgef12(0.21), Dock10(0.2…
postsynaptic density	3.75596e-06	0.177123	1.45948e-19	9.38845e-18	180	0.106128	3.48475e-05	1.4234e-09	5.81654e-06	3.20889e-06	Ntrk2(0.94), Ntrk2(0.94), Clstn3(0.92), Add2(0.83), Pde4b(0.68), Nrgn(0.68), Sema4c(0.62), Shank3(0.61), Cdk5r1(0.59), Bsn(0.54), Map1b(0.51), Map1b(0.51), Cpeb4(0.51), Cacna1c(0.5), Il1r1(0.49), Sh2d5(0.48), Entpd1(0.47), Map2(0.47), Dst(0.46), Macf1(0.44), Plcb4(0.42), Dbn1(0.4), Itga8(0.39), Kalrn(0.39), Fyn(0.37), Kcnab2(0.37), Prkcg(0.36), Bcr(0.35), Pclo(0.34), Adora1(0.32), Bmpr2(0.32), Ep…
transcription factor binding	8.27878e-06	0.125912	1.66726e-19	1.05335e-17	340	2.57219e-05	0.00152392	4.57728e-06	2.56244e-05	2.93996e-06	Fos(0.83), Jun(0.69), Jun(0.69), Pim1(0.63), Arid5a(0.61), Nr4a1(0.58), Twist1(0.57), Twist1(0.57), Nab2(0.54), Trib1(0.51), Trib1(0.51), Trib1(0.51), Junb(0.5), Tfap2a(0.49), Rorb(0.49), Egr1(0.48), Epas1(0.48), Epas1(0.48), Nlrp3(0.48), Per1(0.45), Gata6(0.43), Gata6(0.43), Flna(0.42), Crebbp(0.4), Crebbp(0.4), Smad3(0.4), Smad3(0.4), Zeb1(0.4), Sirt1(0.4), Ankrd1(0.4), Id3(0.39), Rest(0.39), E…
guanyl-nucleotide exchange factor activity	1.90322e-05	0.185024	2.48144e-19	1.54023e-17	153	0.000107779	0.000143495	1.93685e-05	8.38059e-06	1.42959e-05	Arhgef39(0.97), Rapgef4(0.63), Rapgef4(0.63), Arfgef3(0.57), Psd3(0.53), Dock11(0.5), Akap13(0.48), Trio(0.48), Arhgef37(0.45), Arhgef38(0.43), Fgd3(0.41), Rapgef5(0.41), Plekhg2(0.4), Fgd5(0.4), Rasgrp4(0.4), Plce1(0.39), Arhgef28(0.39), Dennd2c(0.39), Kalrn(0.39), Dennd3(0.37), Arhgef15(0.37), Rasgrf2(0.36), Bcar3(0.36), Rapgef2(0.36), Bcr(0.35), Arhgef17(0.35), Dock9(0.33), Farp1(0.33), Rasgef…
RNA polymerase II regulatory region sequence-specific DNA binding	1.9812e-05	0.182119	3.4677e-19	2.1153e-17	157	1.21366e-05	9.42355e-05	5.6258e-05	0.000277836	2.35316e-06	Atf3(0.99), Nr4a2(0.91), Nr1d1(0.89), E2f7(0.85), Gata5(0.71), Rel(0.66), Plagl1(0.65), Ikzf3(0.61), Fosl2(0.6), Dbp(0.57), Dbp(0.57), Foxf1(0.56), Nfil3(0.54), Arid5b(0.54), Junb(0.5), Tfap2a(0.49), Egr1(0.48), Egr1(0.48), Bcl6b(0.46), Runx1(0.44), Gli3(0.43), Eaf2(0.42), Crebbp(0.4), Lmx1b(0.4), Smad3(0.4), Glis3(0.4), Zbed6(0.4), Lyl1(0.38), Glis1(0.37), Osr2(0.36), Hlf(0.35), Rarb(0.34), Rora…
negative regulation of cell migration	1.49322e-05	0.237958	3.76301e-19	2.25653e-17	92	0.00745401	5.99471e-06	8.76483e-06	6.34242e-06	6.66146e-06	Nog(0.96), Drd1(0.69), Stc1(0.69), Il1rn(0.62), Wnt11(0.6), Srgap1(0.53), Serpine1(0.52), Sulf1(0.52), Dlc1(0.46), Pdgfb(0.45), Ptprj(0.43), Ptprj(0.43), Ager(0.42), Robo4(0.42), Sfrp2(0.4), Egfl7(0.37), Ptn(0.36), Trp53inp1(0.35), Arap3(0.35), Bcr(0.35), Adarb1(0.32), Slit2(0.31), Epha1(0.3), Klf4(0.3), Nf1(0.29), Nf1(0.29), Nf1(0.29), Igfbp5(0.28), Robo1(0.28), Cited2(0.27), Srgap3(0.27), Ptpru…
epidermal growth factor receptor signaling pathway	2.62455e-05	0.314982	9.25935e-19	5.45993e-17	51	7.92124e-06	1.82024e-05	0.00020476	1.92427e-05	0.000228127	Ereg(0.79), Hbegf(0.64), Hbegf(0.64), Egf(0.56), Egf(0.56), Egf(0.56), Cbl(0.48), Socs5(0.44), Fes(0.41), Areg(0.37), Areg(0.37), Erbb3(0.35), Pigr(0.35), Cblb(0.32), Abl2(0.3), Tgfa(0.3), Tgfa(0.3), Tgfb1(0.28), Fam83b(0.28), Src(0.26), Egfr(0.25), Egfr(0.25), Egfr(0.25), Egfr(0.25), Iqgap1(0.22), Iqgap1(0.22), Plcg1(0.2), Garem1(0.2), Abl1(0.19), Gab1(0.17), Btc(0.16), Btc(0.16), Ptpn11(0.16), …
extracellular matrix	2.02882e-08	0.1957	1.05988e-18	6.11201e-17	256	0.00555894	0.00141303	1.30096e-07	1.26268e-07	9.34173e-05	Mmp8(1.13), Adamts4(0.97), Adamts4(0.97), Tnc(0.86), Tnc(0.86), Mmp25(0.83), S100a9(0.76), Papln(0.74), Thbs1(0.72), Thbs1(0.72), Slpi(0.71), Cd93(0.66), Mmp3(0.65), Mmp9(0.59), Adamts1(0.57), Lmcd1(0.57), Mmp19(0.57), Thsd4(0.57), Emilin2(0.57), Emilin2(0.57), Col12a1(0.56), Col12a1(0.56), Plec(0.56), Serpine1(0.52), Dsp(0.5), Thbs2(0.46), Mmp14(0.45), Pdgfb(0.45), Timp1(0.45), Mmp7(0.43), Lama5…
calmodulin binding	8.88883e-06	0.190061	1.07107e-18	6.11201e-17	143	0.00873013	0.00127724	1.00042e-08	2.50426e-05	3.33843e-06	Add2(0.83), Myh4(0.81), Ryr1(0.74), Nrgn(0.68), Nrgn(0.68), Nrgn(0.68), Pde1c(0.62), Ttn(0.57), Sntb1(0.55), Camk4(0.54), Phkg1(0.52), Nos3(0.51), Cacna1c(0.5), Adcy1(0.48), Map2(0.47), Marcksl1(0.45), Nos2(0.45), Rrad(0.43), Pcnt(0.41), Ceacam1(0.41), Camkk1(0.41), Tjp1(0.4), Myh9(0.39), Myo1b(0.39), Itpkc(0.37), Iqcb1(0.37), Iqcb1(0.37), Rasgrf2(0.36), Sphk1(0.36), Sphk1(0.36), Mapkapk5(0.35), …
regulation of transcription from RNA polymerase II promoter	2.87481e-05	0.122191	3.13788e-18	1.7622e-16	338	0.00129623	0.000404797	2.02823e-06	2.48858e-05	1.00186e-05	Inhba(1.17), Fosb(1.12), Atf3(0.99), Fos(0.83), Nfe2(0.82), Nfkbid(0.67), Notch1(0.64), Notch1(0.64), Sox7(0.62), Fosl2(0.6), Dbp(0.57), Arid5b(0.54), Med13(0.53), Junb(0.5), Tead4(0.5), Tfap2a(0.49), Tceal3(0.49), Maff(0.47), Mamld1(0.47), Epc1(0.44), Hsf4(0.44), Batf(0.44), Nfkbiz(0.44), Ptafr(0.42), Sim1(0.41), Ets1(0.41), Lmx1b(0.4), Smad3(0.4), Nupr1(0.4), Ankrd1(0.4), Glis3(0.4), Tshz3(0.4)…
neutrophil chemotaxis	3.35361e-06	0.364955	9.77806e-18	5.40543e-16	48	0.01078	0.000679676	0.000176078	1.14817e-05	6.35756e-09	Cxcl3(1.29), Cxcl3(1.29), Cxcr2(1.09), Trem1(1.06), Ccl11(0.83), Csf3r(0.82), Ccl6(0.82), S100a9(0.76), S100a8(0.74), Il1b(0.69), Pde4b(0.68), C5ar1(0.63), Syk(0.63), Cxcl2(0.62), Amica1(0.62), Ccl7(0.56), Ccl20(0.55), Itgam(0.44), Fcgr3(0.43), Itga9(0.36), Pde4d(0.33), Lgals3(0.27), Ccl2(0.27), Ccl2(0.27), Spp1(0.26), Spp1(0.26), Cxadr(0.21), Itgb2(0.18), Itgb2(0.18), Ccl4(0.18), Fcer1g(0.17), N…
regulation of cell shape	3.85615e-05	0.189523	1.07271e-17	5.83882e-16	135	0.00190863	2.59463e-05	6.01335e-06	0.000589818	5.07902e-06	Il6(1.24), Ccl11(0.83), Sema3e(0.69), Gas7(0.62), Kdr(0.51), Dlc1(0.46), Cdc42ep4(0.43), Cdc42ep4(0.43), Cdc42ep3(0.43), Fes(0.41), Fn1(0.4), Epb41l2(0.39), Myh9(0.39), Myh9(0.39), Plxnb1(0.39), Plxnb1(0.39), Rhoj(0.38), Fyn(0.37), Shroom3(0.37), Rhou(0.37), Rhou(0.37), Fgr(0.36), Ptn(0.36), Wipf2(0.36), Arap3(0.35), Fermt2(0.34), Anxa1(0.33), Ttbk2(0.33), Pdpn(0.32), Csnk1e(0.32), Phip(0.31), Sy…
platelet-derived growth factor receptor signaling pathway	3.52002e-05	0.342436	1.3e-17	6.96878e-16	41	0.00163873	0.000417085	3.46861e-06	5.0093e-06	9.55835e-05	Csrnp1(0.78), Itgb3(0.67), Arid5b(0.54), Plat(0.51), Plat(0.51), Pdgfb(0.45), Pdgfb(0.45), Ptprj(0.43), Tiparp(0.39), Schip1(0.36), Bcr(0.35), Zfand5(0.32), Txnip(0.32), Jak2(0.31), Abl2(0.3), Myo1e(0.3), Pdgfa(0.28), Pdgfa(0.28), Pdgfra(0.27), Pdgfra(0.27), Src(0.26), Iqgap1(0.22), Abl1(0.19), Abl1(0.19), Pdgfrb(0.19), Pdgfrb(0.19), Gab1(0.17), Rapgef1(0.17), Zfp950(0.17), Ptpn11(0.16), Sgpl1(0.…
circadian rhythm	5.01614e-05	0.261698	2.36536e-17	1.24905e-15	69	0.00120531	2.61143e-06	2.47225e-05	4.60509e-05	0.000665852	Ntrk2(0.94), Nr1d1(0.89), Nr1d1(0.89), Bhlhe41(0.74), Prok1(0.74), Noct(0.59), Dbp(0.57), Nfil3(0.54), Ngf(0.54), Id4(0.51), Nos2(0.45), Per1(0.45), Per1(0.45), Per1(0.45), Cry2(0.44), Bhlhe40(0.43), Per3(0.4), Sirt1(0.4), Id3(0.39), Prkg2(0.38), Prox1(0.36), Ntrk3(0.35), Setx(0.34), Ep300(0.33), Id1(0.32), Csnk1e(0.32), Dyrk1a(0.29), Ddx5(0.26), Rbm4b(0.25), Ncoa2(0.22), Timeless(0.22), Gsk3b(0.…
transcription coactivator activity	6.99604e-05	0.156029	2.49692e-17	1.29913e-15	195	6.45035e-06	0.000657212	0.000132278	7.91561e-05	8.71724e-05	Jun(0.69), Jun(0.69), Arid5b(0.54), Med13(0.53), Junb(0.5), Tfap2a(0.49), Tfap2a(0.49), Maml2(0.43), Maml2(0.43), Lpin2(0.41), Crebbp(0.4), Crebbp(0.4), Nrip1(0.39), Nrip1(0.39), Kmt2e(0.38), Myocd(0.37), Sp4(0.36), Cited4(0.34), Cited4(0.34), Ep300(0.33), Ep300(0.33), Ep300(0.33), Dyrk1b(0.32), Pml(0.32), Ccar1(0.32), Ccar1(0.32), Kat6a(0.31), Elf3(0.29), Hinfp(0.29), Cited2(0.27), Cited2(0.27),…
integrin binding	2.03625e-06	0.251855	2.87371e-17	1.46567e-15	98	0.0438355	0.00835073	5.78452e-06	5.39196e-09	3.21019e-06	Thbs1(0.72), Adam8(0.71), Itgb3(0.67), Gfra1(0.65), Syk(0.63), Amica1(0.62), Gpnmb(0.57), Sema7a(0.54), Kdr(0.51), Esm1(0.51), Esm1(0.51), Utrn(0.5), Itga5(0.48), Itga5(0.48), Vcam1(0.47), Fgf1(0.45), Mmp14(0.45), Itga2(0.44), S1pr3(0.43), Lama5(0.42), Lama5(0.42), Fn1(0.4), Emp2(0.38), Emp2(0.38), Lamb1(0.38), Wisp1(0.38), Lamb2(0.36), Tln1(0.36), Plpp3(0.36), Ctgf(0.35), Thbs4(0.35), Nov(0.34),…
lung alveolus development	2.70648e-05	0.330555	2.89986e-17	1.46567e-15	44	0.0197462	6.13609e-05	3.27015e-07	4.45327e-06	0.000339611	Lif(1.22), Pgr(0.66), Meg3(0.59), Foxf1(0.56), Atxn1(0.53), Kdr(0.51), Errfi1(0.39), Flt4(0.38), Stra6(0.37), Myocd(0.37), Rc3h2(0.35), Bmpr2(0.32), Fgfr2(0.32), Fgfr2(0.32), Pdpn(0.32), Tgfb3(0.3), Mapk8ip3(0.3), Vegfa(0.29), Igfbp5(0.28), Pdgfa(0.28), Stk40(0.28), Hopx(0.28), Atxn1l(0.25), Atxn1l(0.25), Ada(0.24), Man2a1(0.22), Tcf21(0.22), Tns3(0.22), Cic(0.2), Cic(0.2), Atp7a(0.17), Sepn1(0.1…
forebrain development	5.6971e-05	0.278608	4.56046e-17	2.27252e-15	60	0.00123947	1.80607e-05	1.58896e-05	0.000518636	3.20682e-05	Prkg1(0.72), Notch1(0.64), Notch1(0.64), Cckar(0.56), Dlc1(0.46), Reln(0.45), Gli3(0.43), Stil(0.39), Lrp6(0.38), Fyn(0.37), Fyn(0.37), Setd2(0.37), Ttbk2(0.33), Apaf1(0.32), Notch3(0.32), Hhex(0.31), Arid1a(0.31), Mapk8ip3(0.3), Atrx(0.29), Numbl(0.26), Src(0.26), Mkl2(0.25), Ncor2(0.23), Dync2h1(0.22), Lrp2(0.21), Numb(0.21), Ndst1(0.18), Ndst1(0.18), Srf(0.16), Aplp1(0.14), Aldh1a2(0.14), Ikzf…
protein kinase binding	1.44175e-05	0.114048	5.02237e-17	2.46794e-15	412	0.000119345	0.000516648	4.52002e-06	0.00381863	3.29009e-06	Nr4a3(0.99), Stx1b(0.69), Musk(0.67), Fam83d(0.65), Dok7(0.64), Dok7(0.64), Syk(0.63), Cdk5r1(0.59), Ttn(0.57), Map2k6(0.55), Ccnl1(0.53), Utrn(0.5), Cd44(0.49), Irs2(0.49), Cbl(0.48), Nbea(0.47), Ppp1r15a(0.45), Nos2(0.45), Cry2(0.44), Spry2(0.44), Fzd5(0.43), Gata6(0.43), Cep250(0.43), Ptprj(0.43), Tns2(0.42), Ceacam1(0.41), Hcls1(0.4), Irs1(0.4), Irs1(0.4), Kcna5(0.4), Kif13b(0.4), Smad3(0.4),…
transmembrane receptor protein tyrosine kinase activity	4.12725e-05	0.326635	5.14971e-17	2.49584e-15	44	0.00292081	2.98262e-05	8.47102e-06	6.61608e-05	0.000122411	Ntrk2(0.94), Ephb3(0.69), Musk(0.67), Kdr(0.51), Ret(0.51), Flt1(0.5), Mst1r(0.47), Epha3(0.46), Epha2(0.41), Flt4(0.38), Ddr2(0.38), Fgfr1(0.36), Ephb2(0.35), Erbb3(0.35), Ntrk3(0.35), Igf1r(0.33), Fgfr2(0.32), Insr(0.32), Epha1(0.3), Mertk(0.3), Epha4(0.29), Ror1(0.28), Pdgfra(0.27), Flt3(0.26), Egfr(0.25), Erbb2(0.25), Erbb4(0.25), Pdgfrb(0.19), Kit(0.17), Axl(0.17), Fgfr4(0.16), Tie1(0.15), C…
basolateral plasma membrane	1.82989e-05	0.163707	7.6369e-17	3.65127e-15	179	0.0014488	7.29385e-05	2.73475e-06	6.84787e-05	0.000447883	Hspa1a(1.41), Slc4a1(0.91), Slc4a1(0.91), Kcnc2(0.86), Nkd2(0.68), C5ar1(0.63), Rapgef4(0.63), Dsp(0.5), Cd44(0.49), Cd44(0.49), Entpd1(0.47), Pdgfb(0.45), Cldn7(0.43), Cldn7(0.43), St14(0.41), Tjp1(0.4), Nod2(0.4), Tgfbr1(0.39), Cdh1(0.38), Heph(0.38), Lin7a(0.38), Slc4a9(0.37), Erbb3(0.35), Aqp9(0.35), Slc23a2(0.34), Adora1(0.32), Best1(0.31), Ndrg4(0.31), Itga3(0.3), Cd46(0.3), Tgfa(0.3), Cnnm…
lung development	2.11944e-05	0.234754	1.05249e-16	4.96494e-15	91	0.102151	4.10979e-05	3.4146e-08	1.07676e-06	0.00122256	Lif(1.22), Chil1(0.71), Notch1(0.64), Mycn(0.63), Foxf1(0.56), Foxf1(0.56), Kdr(0.51), Nos3(0.51), Epas1(0.48), Fgf1(0.45), Mmp14(0.45), Lox(0.44), Spry2(0.44), Gli3(0.43), Gli3(0.43), Heg1(0.43), Lama5(0.42), Tshz3(0.4), Adamts2(0.38), Stra6(0.37), Fgfr1(0.36), Fgfr1(0.36), Ctgf(0.35), Foxp1(0.34), Ep300(0.33), Fgfr2(0.32), Fgfr2(0.32), Pdpn(0.32), Fgf2(0.31), Fgf2(0.31), Ccbe1(0.31), Itga3(0.3)…
endocytosis	7.74997e-05	0.163423	1.10714e-16	5.15402e-15	172	0.000194701	0.000120104	0.000769884	0.000184189	5.18424e-06	Arc(0.81), Sgip1(0.75), Stab2(0.64), Pla2r1(0.56), Mrc1(0.51), Lrp1(0.45), Lrp6(0.38), Nostrin(0.37), Sorl1(0.36), Wipf2(0.36), Csnk1e(0.32), Snx18(0.32), Snx18(0.32), Pstpip1(0.31), Hip1(0.31), Micall1(0.3), Myo1e(0.3), Rin2(0.3), Lmbr1l(0.29), Fnbp1l(0.29), Rinl(0.29), Pacsin3(0.27), Dpysl2(0.26), Ly75(0.25), Ophn1(0.25), Itsn2(0.24), Atp9b(0.24), Picalm(0.24), Npc1(0.23), Rabgef1(0.23), Lrrk2(…
positive regulation of protein kinase B signaling	4.59735e-05	0.260086	1.27964e-16	5.87971e-15	69	0.0132168	0.000189572	2.21477e-05	1.77766e-06	6.53145e-05	Il6(1.24), Csf3(0.76), Thbs1(0.72), Adam8(0.71), Chil1(0.71), Chil1(0.71), Hbegf(0.64), F10(0.62), C1qtnf1(0.52), Mst1r(0.47), Rasd2(0.45), Spry2(0.44), Akr1c18(0.44), Ptprj(0.43), Hcls1(0.4), Tgfbr1(0.39), F3(0.38), Gcnt2(0.38), Gcnt2(0.38), C1qtnf3(0.35), Igf1r(0.33), Insr(0.32), Fgf2(0.31), Rictor(0.31), Rictor(0.31), Fam110c(0.29), Igfbp5(0.28), Pdgfa(0.28), Tgfb1(0.28), Src(0.26), Angpt1(0.2…
RNA polymerase II transcription factor activity, sequence-specific DNA binding	6.88511e-05	0.193639	2.89695e-16	1.31403e-14	120	0.0250756	0.00103522	1.04821e-05	1.19477e-05	2.3269e-06	Bhlhe41(0.74), Jun(0.69), Rel(0.66), Plagl1(0.65), Twist1(0.57), Foxq1(0.55), Sox4(0.54), Etv4(0.5), Tfap2a(0.49), Runx1(0.44), Foxd2(0.44), Gata6(0.43), Bhlhe40(0.43), Sim1(0.41), Ets1(0.41), Elk4(0.39), Rest(0.39), Lyl1(0.38), Elf4(0.38), Prox1(0.36), Sp4(0.36), Tal1(0.35), Erg(0.34), Hif1a(0.34), Maf(0.34), Bhlhe22(0.34), Ets2(0.33), Elk3(0.29), Foxs1(0.29), Ovol2(0.29), Klf11(0.29), Plagl2(0.…
single organismal cell-cell adhesion	3.61418e-05	0.226689	3.99313e-16	1.78832e-14	95	0.00428636	0.00144732	6.83979e-05	4.77027e-06	1.57987e-05	Selp(0.72), Adam8(0.71), Cd93(0.66), Cd93(0.66), Cdh5(0.59), Cdh5(0.59), Foxf1(0.56), Dsp(0.5), Cldn5(0.49), Vcam1(0.47), Itgam(0.44), Adgrv1(0.41), Myh9(0.39), Kirrel(0.39), Kirrel(0.39), Cdh1(0.38), Cdh1(0.38), Lrp6(0.38), Plpp3(0.36), Lama3(0.34), Esam(0.33), Tnxb(0.33), Pdpn(0.32), Slit2(0.31), Slit2(0.31), Lmo7(0.3), Ttyh1(0.29), Nectin4(0.29), Itga4(0.27), Cyr61(0.26), Ptpru(0.26), Egfr(0.2…
blood vessel morphogenesis	7.22837e-05	0.367412	4.32957e-16	1.91475e-14	33	0.0232233	0.000109351	1.22514e-05	6.5502e-05	1.03831e-05	Thbs1(0.72), Gja1(0.63), Syk(0.63), Angpt2(0.56), Edn1(0.53), Flt1(0.5), Efnb2(0.48), Pdgfb(0.45), Pdgfb(0.45), Epha2(0.41), Flt4(0.38), Fgfr1(0.36), Hif1a(0.34), Col4a1(0.32), Vegfa(0.29), Vegfa(0.29), Vegfa(0.29), Ahr(0.28), Mkl2(0.25), Cyp1b1(0.24), Shb(0.2), Shb(0.2), Meis1(0.19), Cdh2(0.15), Rasa1(0.12), Acvrl1(0.11), Nr2f2(0.06), Sos1(0.04), Itga7(-0.02), Amot(-0.08), Nedd4(-0.14), Nedd4(-0…
positive regulation of GTPase activity	6.80383e-05	0.18767	4.40136e-16	1.92247e-14	128	0.0118658	0.000345384	0.000648539	1.19793e-05	5.09624e-07	Rgs16(0.83), Rgs16(0.83), Ccl11(0.83), Ccl11(0.83), Ccl6(0.82), Rgs1(0.66), Rapgef4(0.63), Wnt11(0.6), S1pr1(0.59), Rgs9(0.58), Ccl7(0.56), Ccl20(0.55), Rgs7(0.54), Gnao1(0.53), Rgs2(0.51), Plxnb1(0.39), Dennd2c(0.39), Kalrn(0.39), Rapgef2(0.36), Rapgef2(0.36), Rapgef2(0.36), Mex3b(0.33), Rasgef1b(0.33), Arhgap23(0.32), Snx18(0.32), Cdkl5(0.32), Rgs4(0.3), Sh3bgrl3(0.3), Nf1(0.29), Nf1(0.29), Nde…
Notch signaling involved in heart development	0.000100833	0.659515	7.68346e-16	3.31513e-14	10	0.00238597	0.000298966	0.000106454	1.44543e-05	0.000111844	Notch1(0.64), Notch1(0.64), Notch1(0.64), Jag1(0.55), Jag1(0.55), Dll1(0.45), Dll4(0.44), Hey1(0.43), Hey2(0.35), Snai1(0.18),
core promoter sequence-specific DNA binding	0.000122463	0.31405	8.12618e-16	3.46391e-14	44	0.00104244	3.26323e-05	2.11613e-05	0.00128238	0.00013951	Nr4a3(0.99), Nr1d1(0.89), Nr1d1(0.89), Ciart(0.85), Ciart(0.85), Zfhx3(0.67), Sox4(0.54), Sox4(0.54), Kmt2a(0.53), Nr1d2(0.44), Nr1d2(0.44), Sirt1(0.4), Rest(0.39), Chd2(0.39), Nrip1(0.39), Esr1(0.37), Myocd(0.37), Prox1(0.36), Rora(0.33), Mef2c(0.26), Pparg(0.23), Hdac5(0.22), Sp1(0.22), Sp1(0.22), Rela(0.21), Gata3(0.18), Nrf1(0.17), Klf10(0.16), Top1(0.13), Atf4(0.12), Meox1(0.12), Nfya(0.11),…
lamellipodium	0.000104199	0.175539	8.83223e-16	3.71861e-14	142	0.000484696	0.00580538	0.000124648	2.60086e-05	1.02482e-05	Arhgap31(0.49), Amotl1(0.47), Dysf(0.45), Ccdc88a(0.43), Dbn1(0.4), Pld1(0.39), Cdh1(0.38), Ptprm(0.38), Kitl(0.37), Apc(0.35), Arap3(0.35), Parvb(0.34), Pdpn(0.32), Plxnd1(0.32), Ptpn13(0.31), Abl2(0.3), Pkd2(0.3), Nradd(0.3), Sh3bgrl3(0.3), Pxn(0.29), Pxn(0.29), Ablim1(0.29), Pik3ca(0.28), Fgd4(0.28), Gsn(0.28), Ppp1r9b(0.27), Myo9b(0.26), Myo9b(0.26), Ctnna1(0.25), Myo10(0.25), Rock1(0.25), Sr…
3'-UTR-mediated mRNA destabilization	0.000135828	0.48959	8.93392e-16	3.71861e-14	18	0.00225445	2.57104e-05	0.000393916	0.00116857	3.41892e-06	Zc3h12a(0.46), Zc3h12a(0.46), Zfp36(0.37), Zfp36(0.37), Zfp36(0.37), Qk(0.36), Rc3h1(0.33), Zfp36l1(0.32), Zfp36l1(0.32), Zfp36l1(0.32), Zfp36l1(0.32), Cpeb3(0.2), Zfp36l2(0.18), Zfp36l2(0.18), Zfp36l2(0.18), Upf1(0.04), Hnrnpd(0.03), Zc3h12d(-0.58),
chemokine activity	3.27755e-05	0.330542	9.19217e-16	3.78162e-14	44	0.000195125	0.000589858	0.00449018	0.000281649	4.13465e-07	Cxcl5(1.3), Cxcl5(1.3), Cxcl3(1.29), Cxcl3(1.29), Ppbp(1.22), Ccl11(0.83), Ccl11(0.83), Ccl6(0.82), Ccl6(0.82), Pf4(0.71), Cxcl2(0.62), Cxcl2(0.62), Cxcl13(0.61), Cxcl13(0.61), Ccl7(0.56), Ccl20(0.55), Ccl20(0.55), Cxcl10(0.39), Cxcl10(0.39), Cxcl14(0.35), Ccl2(0.27), Ccl2(0.27), Ccl4(0.18), Ccl4(0.18), Cxcl12(0.13), Cxcl12(0.13), Cxcl1(0.12), Cxcl1(0.12), Cxcl16(0.09), Cxcl16(0.09), Ccl9(0.03), …
negative regulation of inflammatory response	6.51308e-05	0.243227	9.32661e-16	3.79282e-14	75	0.000740961	0.000158182	0.000118579	5.26105e-05	0.000287628	Acod1(1.12), Nlrp12(1.12), Mefv(0.9), Socs3(0.85), Ffar4(0.66), Ctla2a(0.61), Tnfaip6(0.59), Foxf1(0.56), Ptger4(0.55), Ptger4(0.55), Ptger4(0.55), Tnfaip3(0.54), Tnfaip3(0.54), Cd44(0.49), Nlrp3(0.48), Adrb2(0.47), Hgf(0.46), Socs5(0.44), Ets1(0.41), Smad3(0.4), Cnr2(0.38), Ier3(0.37), Zfp36(0.37), C1qtnf3(0.35), Bcr(0.35), Nov(0.34), Cd276(0.34), Rora(0.33), Adora1(0.32), Calcrl(0.32), Ash1l(0.…
neuronal cell body	2.19658e-05	0.10833	9.46763e-16	3.80642e-14	400	0.00363702	0.00100895	1.50258e-08	6.29283e-05	0.00432772	Igsf9b(1.05), Gal(1.01), Ntrk2(0.94), Nr1d1(0.89), Kcnc2(0.86), Hdc(0.84), Apob(0.76), Drd1(0.69), Nrgn(0.68), Gfra1(0.65), Ang(0.64), Rapgef4(0.63), Itpr3(0.62), Pde1c(0.62), Cit(0.6), Ccr1(0.6), Cdk5r1(0.59), Plk3(0.58), Arg1(0.57), Crmp1(0.55), Ptger4(0.55), Bsn(0.54), Kcnab1(0.53), Ncam1(0.52), Ncam1(0.52), Pde10a(0.52), Kdr(0.51), Map1b(0.51), Ret(0.51), Cacna1c(0.5), Cacna1c(0.5), Syt5(0.48…
regulation of Rho protein signal transduction	0.000113344	0.254264	1.00493e-15	3.99488e-14	67	0.00216422	0.000299797	6.57665e-05	0.000181168	2.23846e-05	Arhgef39(0.97), Eps8l1(0.6), Akap13(0.48), Trio(0.48), Dlc1(0.46), Arhgef37(0.45), Arhgef38(0.43), Fgd3(0.41), Plekhg2(0.4), Fgd5(0.4), Arhgef28(0.39), Kalrn(0.39), Arhgef15(0.37), Rasgrf2(0.36), Bcr(0.35), Arhgef17(0.35), Farp1(0.33), Fgd6(0.32), Arhgef10(0.32), Tiam1(0.31), Prex2(0.31), Plekhg3(0.3), Fgd4(0.28), Myo9b(0.26), Itsn2(0.24), Arhgef12(0.21), Dnmbp(0.19), Spata13(0.19), Cdh2(0.15), F…
circadian regulation of gene expression	0.000114383	0.254022	1.08697e-15	4.27301e-14	67	0.00422172	3.50186e-05	0.000301707	9.23083e-05	3.82638e-05	Nr1d1(0.89), Ciart(0.85), Bhlhe41(0.74), Zfhx3(0.67), Noct(0.59), Kmt2a(0.53), Per1(0.45), Per1(0.45), Per1(0.45), Cry2(0.44), Cry2(0.44), Rbm4(0.44), Bhlhe40(0.43), Bhlhe40(0.43), Per3(0.4), Sirt1(0.4), Sirt1(0.4), Nrip1(0.39), Nrip1(0.39), Prkg2(0.38), Rora(0.33), Pml(0.32), Csnk1e(0.32), Ahr(0.28), Usp2(0.25), Rbm4b(0.25), Ncoa2(0.22), Per2(0.21), Per2(0.21), Relb(0.18), Kdm5a(0.18), Prkcdbp(0…
cytokine-mediated signaling pathway	9.49115e-05	0.213954	1.12567e-15	4.37649e-14	96	0.00202295	0.000962512	0.000148841	9.7544e-06	5.65403e-05	Il6(1.24), Socs3(0.85), Csf2rb(0.8), Ereg(0.79), Ereg(0.79), Iigp1(0.76), Il1f6(0.75), Pf4(0.71), Il1b(0.69), Il1b(0.69), Il1rn(0.62), Il6ra(0.54), Il1r1(0.49), Il1f9(0.47), Sh2b2(0.46), Nyx(0.46), Flrt3(0.45), Klf6(0.44), Socs5(0.44), Irak3(0.4), F3(0.38), Rtn4rl2(0.38), Socs2(0.36), Il22ra1(0.33), Csf2rb2(0.32), Jak2(0.31), Jak2(0.31), Jak2(0.31), Jak3(0.29), Jak3(0.29), Dcn(0.27), Ccl2(0.27), …
apical plasma membrane	9.66941e-05	0.123532	1.49057e-15	5.73223e-14	289	4.18958e-05	7.476e-06	8.38484e-05	0.000146565	0.0227989	Hspa1a(1.41), Kcnc2(0.86), Trpm6(0.83), Slc26a4(0.78), Slc26a4(0.78), Slc9a3(0.73), Slc9a3(0.73), Cldn4(0.69), Stc1(0.69), Itgb3(0.67), Itgb3(0.67), Notch1(0.64), Gja1(0.63), Rapgef4(0.63), Cntfr(0.62), Trf(0.61), Plec(0.56), Jag1(0.55), Il6ra(0.54), Slc2a5(0.51), Rab27b(0.51), Myrip(0.5), Cd44(0.49), Osmr(0.49), Fam65b(0.49), Adrb2(0.47), Kcne4(0.47), Cyp4f18(0.47), Amotl1(0.47), Tnik(0.47), Ano…
focal adhesion	7.68397e-06	0.13195	1.61304e-15	6.13648e-14	368	0.00031537	0.0226978	0.000278654	4.77174e-06	7.57627e-06	Hspa1a(1.41), Tnc(0.86), Akap12(0.68), Itgb3(0.67), Spry4(0.66), Kif23(0.66), Rnd3(0.65), Gja1(0.63), Plec(0.56), Sntb1(0.55), Itgav(0.53), Ahnak(0.52), Flt1(0.5), Cd44(0.49), Synpo2(0.49), Efnb2(0.48), Itga5(0.48), Tns4(0.48), Dlc1(0.46), Lrp1(0.45), Mmp14(0.45), Flrt3(0.45), Itga2(0.44), Lpp(0.44), Flna(0.42), Tns2(0.42), Epha2(0.41), Fes(0.41), Flnb(0.41), Flnb(0.41), Hspg2(0.4), Epb41l2(0.39)…
response to lipopolysaccharide	2.30356e-05	0.201501	1.64719e-15	6.19973e-14	124	0.0672016	0.00460136	5.53074e-05	3.1147e-06	1.42898e-07	Cxcl5(1.3), Cxcl3(1.29), Ppbp(1.22), Ptgs2(1.16), Acod1(1.12), Ptger2(0.89), Dusp10(0.72), Slpi(0.71), Pf4(0.71), Cyp27b1(0.69), Il1b(0.69), Il1b(0.69), Jun(0.69), Wfdc21(0.65), Cxcl2(0.62), Cxcl13(0.61), Noct(0.59), Ptger4(0.55), Tlr4(0.55), Tlr4(0.55), Tlr4(0.55), Ncf2(0.52), Ptpn22(0.52), Trib1(0.51), Trib1(0.51), Ednrb(0.5), Junb(0.5), Tfap2a(0.49), Ednra(0.48), Nos2(0.45), Ptafr(0.42), Ptgir…
regulation of cell migration	0.000128069	0.23384	2.04598e-15	7.61964e-14	78	0.00970343	0.000517429	4.51799e-05	1.75369e-05	5.08656e-05	Cxcr4(0.86), Cxcr4(0.86), Plxna2(0.69), Itgb3(0.67), Mmp3(0.65), Notch1(0.64), Unc5c(0.55), Plxna4(0.54), Adgrg3(0.53), Lama4(0.48), Epha3(0.46), Plxnc1(0.45), Lama5(0.42), Flna(0.42), Plxnb1(0.39), Lama2(0.38), Egfl7(0.37), Apc(0.35), Apc(0.35), Lama3(0.34), Lama1(0.32), Plxnd1(0.32), Slk(0.31), Slk(0.31), Prkx(0.29), Pecam1(0.26), Vcl(0.26), Erbb4(0.25), Rtn4(0.25), Mysm1(0.25), Srcin1(0.24), W…
transmembrane signaling receptor activity	3.94959e-05	0.255519	3.76072e-15	1.38598e-13	72	0.0521728	0.00166317	4.85341e-05	3.8025e-07	3.39874e-05	Clec2h(1.09), Tlr6(0.88), Sele(0.85), Thbd(0.8), Celsr3(0.66), Clec1b(0.6), Lyve1(0.6), Pla2r1(0.56), Tlr4(0.55), Adgrg3(0.53), Fcamr(0.53), Nfam1(0.53), Nfam1(0.53), Mrc1(0.51), Adgrf5(0.5), Tlr5(0.44), Tlr7(0.44), Fzd5(0.43), Adgrv1(0.41), Adcyap1r1(0.35), Calcr(0.32), Calcrl(0.32), Adgrg6(0.3), Fzd4(0.29), Adgrf1(0.27), Celsr1(0.26), Sema6a(0.26), Tlr1(0.26), Tlr1(0.26), Egfr(0.25), Erbb2(0.25…
in utero embryonic development	0.000151989	0.131568	5.62923e-15	2.05322e-13	243	0.00030309	0.000690528	0.00137205	1.16481e-05	0.000314707	Wnt9b(1), Nog(0.96), Apob(0.76), Notch1(0.64), Gja1(0.63), Meg3(0.59), Chd7(0.59), Chd7(0.59), Prdm1(0.57), Insl3(0.57), Ttn(0.57), Twist1(0.57), Foxf1(0.56), Foxf1(0.56), Edn1(0.53), Nos3(0.51), Junb(0.5), Tead4(0.5), Ednra(0.48), Maff(0.47), Bcl2l11(0.46), Dll1(0.45), Kmt2d(0.45), Runx1(0.44), Gata6(0.43), Gli3(0.43), Dnmt3l(0.43), Heg1(0.43), Heg1(0.43), Pcnt(0.41), Smad3(0.4), Tshz3(0.4), Myh…
axon	0.000117637	0.125886	7.7146e-15	2.78513e-13	267	0.00287668	0.00120517	2.43059e-06	0.000355552	0.000301875	Ntrk2(0.94), Kcnc2(0.86), Drd1(0.69), Nrgn(0.68), Pgr(0.66), Gfra1(0.65), Rapgef4(0.63), Cdk5r1(0.59), Bsn(0.54), Kcnab1(0.53), Ncam1(0.52), Map1b(0.51), Ret(0.51), Il1r1(0.49), Slc38a2(0.48), Adrb2(0.47), Reln(0.45), Adam22(0.44), Itga2(0.44), Cntnap1(0.44), Ager(0.42), Sema3a(0.42), Sema3a(0.42), Kif13b(0.4), Sirt1(0.4), Azin2(0.4), Grk3(0.4), Cdh1(0.38), Nrp2(0.38), Kcnab2(0.37), Kcnab2(0.37),…
blood vessel development	5.29766e-05	0.265844	1.25213e-14	4.47479e-13	62	0.0377887	0.000222556	1.19386e-06	0.000139416	0.000334317	Chd7(0.59), Foxf1(0.56), Itgav(0.53), Lama4(0.48), Pdgfb(0.45), Lox(0.44), Hey1(0.43), Epha2(0.41), Ceacam1(0.41), Stra6(0.37), Egfl7(0.37), Sphk1(0.36), Plpp3(0.36), Rapgef2(0.36), Hey2(0.35), Tbx3(0.35), Gja5(0.34), Hif1a(0.34), Tgfbr3(0.33), Foxc1(0.32), Mfsd7b(0.3), Foxs1(0.29), Fzd4(0.29), Vegfa(0.29), Ahr(0.28), Col3a1(0.27), Gja4(0.27), Cited2(0.27), Mef2c(0.26), Pkd1(0.25), Foxo1(0.25), M…
substrate adhesion-dependent cell spreading	0.000111017	0.33529	1.39177e-14	4.92408e-13	39	0.0648748	0.000229231	2.83097e-05	1.63731e-05	6.86285e-05	Ephb3(0.69), Itgb3(0.67), Itgav(0.53), Lama5(0.42), Fn1(0.4), Itga8(0.39), Lamb1(0.38), Lamc1(0.36), Fermt2(0.34), Peak1(0.34), Epha1(0.3), Mertk(0.3), Fzd4(0.29), Pxn(0.29), Itga4(0.27), Fndc3b(0.27), Src(0.26), Srcin1(0.24), Antxr1(0.23), Abl1(0.19), Efna1(0.18), Axl(0.17), Tyro3(0.11), Srgap2(0.1), Fermt3(0.1), Fer(0.07), Rab1a(0.06), Rac1(0.06), Rac1(0.06), Rac1(0.06), Micall2(0.05), Fzd7(0.0…
transcription factor complex	0.000161526	0.13923	1.94473e-14	6.81235e-13	220	0.0278791	0.0005323	6.38909e-05	9.9302e-05	1.47191e-05	Nr4a3(0.99), E2f7(0.85), Fos(0.83), Gata5(0.71), Jun(0.69), Jun(0.69), Zfhx3(0.67), Rel(0.66), Arid5a(0.61), Nr4a1(0.58), Junb(0.5), Tead4(0.5), Tfap2a(0.49), Epas1(0.48), Epas1(0.48), Gata6(0.43), Hivep2(0.43), Smad7(0.41), Ets1(0.41), Crebbp(0.4), Crebbp(0.4), Hcls1(0.4), Smad3(0.4), Zeb1(0.4), Ankrd1(0.4), Smad6(0.36), Hey2(0.35), Tal1(0.35), Tal1(0.35), Tal1(0.35), Tbx3(0.35), Tcf4(0.35), Hif…
protein-glycine ligase activity	0.000180161	0.139787	2.04312e-14	7.08681e-13	218	0.000519212	9.65187e-05	0.0174133	0.000104286	2.31001e-05	Rnf125(0.64), Tnfaip3(0.54), Cbl(0.48), Herc2(0.48), Trim36(0.47), Hecw2(0.47), Hectd1(0.43), Rnf169(0.42), Rnf180(0.38), Mid1(0.37), Egr2(0.36), Birc3(0.35), Hectd2(0.35), Rc3h2(0.35), Rnf144b(0.34), Ubr2(0.34), Ubr4(0.33), Rnf38(0.33), Cblb(0.32), Rlim(0.29), Msl2(0.29), Trim39(0.29), Neurl3(0.29), Trim56(0.29), Ubr5(0.28), G2e3(0.28), Smurf1(0.27), Sh3rf1(0.26), Neurl1a(0.25), March7(0.25), Rn…
positive regulation of angiogenesis	3.75642e-05	0.20727	2.15834e-14	7.4138e-13	109	0.00709927	0.00757371	0.000181057	1.3548e-05	1.11344e-05	Cxcr2(1.09), Ccl11(0.83), Thbs1(0.72), Chil1(0.71), Il1b(0.69), Pgf(0.69), Pgf(0.69), Itgb3(0.67), Vash2(0.64), Vash2(0.64), C5ar1(0.63), Mmp9(0.59), Angpt2(0.56), Serpine1(0.52), Serpine1(0.52), Kdr(0.51), Kdr(0.51), Nos3(0.51), Flt1(0.5), Hgf(0.46), Zc3h12a(0.46), Fgf1(0.45), Runx1(0.44), Gata6(0.43), Alox12(0.42), Hipk2(0.42), Ets1(0.41), Sfrp2(0.4), Sirt1(0.4), F3(0.38), Sphk1(0.36), Hif1a(0.…
protein-glutamic acid ligase activity	0.000177499	0.140353	2.33947e-14	7.95868e-13	218	0.000643142	0.000108243	0.0177898	8.27117e-05	2.30199e-05	Rnf125(0.64), Tnfaip3(0.54), Cbl(0.48), Herc2(0.48), Trim36(0.47), Hecw2(0.47), Hectd1(0.43), Rnf169(0.42), Rnf180(0.38), Mid1(0.37), Egr2(0.36), Birc3(0.35), Hectd2(0.35), Rc3h2(0.35), Rnf144b(0.34), Ubr2(0.34), Ubr4(0.33), Rnf38(0.33), Cblb(0.32), Rlim(0.29), Msl2(0.29), Trim39(0.29), Neurl3(0.29), Trim56(0.29), Ubr5(0.28), G2e3(0.28), Smurf1(0.27), Sh3rf1(0.26), Neurl1a(0.25), March7(0.25), Rn…
positive regulation of MAPK cascade	8.43083e-05	0.212665	2.57143e-14	8.48719e-13	94	0.116109	0.000465096	1.44032e-05	2.46146e-06	0.000173508	Il6(1.24), Lif(1.22), Ntrk2(0.94), Il11(0.9), Il11(0.9), Sstr4(0.71), Cd84(0.69), Osm(0.69), Itgb3(0.67), Igfbp3(0.55), Itgav(0.53), C1qtnf1(0.52), Kdr(0.51), Flt1(0.5), Adrb2(0.47), Pdgfb(0.45), Nod2(0.4), Flt4(0.38), Fgfr1(0.36), Bmp2(0.34), Igf1r(0.33), Fgfr2(0.32), Insr(0.32), P2rx7(0.32), Ptprc(0.31), Nradd(0.3), Dab2ip(0.3), Tnfrsf11b(0.28), Pdgfa(0.28), Cd40(0.26), Spag9(0.26), Erbb2(0.25)…
receptor binding	0.000164481	0.117558	2.61257e-14	8.48719e-13	305	0.00698563	3.03316e-05	9.76561e-06	0.019921	2.72736e-05	Hspa1a(1.41), Il6(1.24), Lif(1.22), Inhba(1.17), Tnfsf14(1.09), Wnt9b(1), Wnt9b(1), H2-Q10(0.95), Drd1(0.69), Il1b(0.69), Ang(0.64), Gja1(0.63), Syk(0.63), Cntfr(0.62), Rnd1(0.62), Wnt11(0.6), Cdh5(0.59), Slit3(0.56), Baat(0.54), Ngf(0.54), Edn1(0.53), Itgav(0.53), Serpine1(0.52), Tenm2(0.52), Plat(0.51), Hilpda(0.51), Efnb2(0.48), Lama4(0.48), Apln(0.48), Fgf1(0.45), Nos2(0.45), Pdgfb(0.45), Lam…
UDP-N-acetylmuramoylalanyl-D-glutamyl-2,6-diaminopimelate-D-alanyl-D-alanine ligase activity	0.000190525	0.140001	2.71072e-14	8.48719e-13	217	0.000594856	0.000115412	0.0165593	9.63282e-05	2.7282e-05	Rnf125(0.64), Tnfaip3(0.54), Cbl(0.48), Herc2(0.48), Trim36(0.47), Hecw2(0.47), Hectd1(0.43), Rnf169(0.42), Rnf180(0.38), Mid1(0.37), Egr2(0.36), Birc3(0.35), Hectd2(0.35), Rc3h2(0.35), Rnf144b(0.34), Ubr2(0.34), Ubr4(0.33), Rnf38(0.33), Cblb(0.32), Rlim(0.29), Msl2(0.29), Trim39(0.29), Neurl3(0.29), Trim56(0.29), Ubr5(0.28), G2e3(0.28), Smurf1(0.27), Sh3rf1(0.26), Neurl1a(0.25), March7(0.25), Rn…
ribosomal S6-glutamic acid ligase activity	0.000190525	0.140001	2.71072e-14	8.48719e-13	217	0.000594856	0.000115412	0.0165593	9.63282e-05	2.7282e-05	Rnf125(0.64), Tnfaip3(0.54), Cbl(0.48), Herc2(0.48), Trim36(0.47), Hecw2(0.47), Hectd1(0.43), Rnf169(0.42), Rnf180(0.38), Mid1(0.37), Egr2(0.36), Birc3(0.35), Hectd2(0.35), Rc3h2(0.35), Rnf144b(0.34), Ubr2(0.34), Ubr4(0.33), Rnf38(0.33), Cblb(0.32), Rlim(0.29), Msl2(0.29), Trim39(0.29), Neurl3(0.29), Trim56(0.29), Ubr5(0.28), G2e3(0.28), Smurf1(0.27), Sh3rf1(0.26), Neurl1a(0.25), March7(0.25), Rn…
coenzyme F420-0 gamma-glutamyl ligase activity	0.000190525	0.140001	2.71072e-14	8.48719e-13	217	0.000594856	0.000115412	0.0165593	9.63282e-05	2.7282e-05	Rnf125(0.64), Tnfaip3(0.54), Cbl(0.48), Herc2(0.48), Trim36(0.47), Hecw2(0.47), Hectd1(0.43), Rnf169(0.42), Rnf180(0.38), Mid1(0.37), Egr2(0.36), Birc3(0.35), Hectd2(0.35), Rc3h2(0.35), Rnf144b(0.34), Ubr2(0.34), Ubr4(0.33), Rnf38(0.33), Cblb(0.32), Rlim(0.29), Msl2(0.29), Trim39(0.29), Neurl3(0.29), Trim56(0.29), Ubr5(0.28), G2e3(0.28), Smurf1(0.27), Sh3rf1(0.26), Neurl1a(0.25), March7(0.25), Rn…
coenzyme F420-2 alpha-glutamyl ligase activity	0.000190525	0.140001	2.71072e-14	8.48719e-13	217	0.000594856	0.000115412	0.0165593	9.63282e-05	2.7282e-05	Rnf125(0.64), Tnfaip3(0.54), Cbl(0.48), Herc2(0.48), Trim36(0.47), Hecw2(0.47), Hectd1(0.43), Rnf169(0.42), Rnf180(0.38), Mid1(0.37), Egr2(0.36), Birc3(0.35), Hectd2(0.35), Rc3h2(0.35), Rnf144b(0.34), Ubr2(0.34), Ubr4(0.33), Rnf38(0.33), Cblb(0.32), Rlim(0.29), Msl2(0.29), Trim39(0.29), Neurl3(0.29), Trim56(0.29), Ubr5(0.28), G2e3(0.28), Smurf1(0.27), Sh3rf1(0.26), Neurl1a(0.25), March7(0.25), Rn…
protein-glycine ligase activity, initiating	0.000190525	0.140001	2.71072e-14	8.48719e-13	217	0.000594856	0.000115412	0.0165593	9.63282e-05	2.7282e-05	Rnf125(0.64), Tnfaip3(0.54), Cbl(0.48), Herc2(0.48), Trim36(0.47), Hecw2(0.47), Hectd1(0.43), Rnf169(0.42), Rnf180(0.38), Mid1(0.37), Egr2(0.36), Birc3(0.35), Hectd2(0.35), Rc3h2(0.35), Rnf144b(0.34), Ubr2(0.34), Ubr4(0.33), Rnf38(0.33), Cblb(0.32), Rlim(0.29), Msl2(0.29), Trim39(0.29), Neurl3(0.29), Trim56(0.29), Ubr5(0.28), G2e3(0.28), Smurf1(0.27), Sh3rf1(0.26), Neurl1a(0.25), March7(0.25), Rn…
protein-glycine ligase activity, elongating	0.000190525	0.140001	2.71072e-14	8.48719e-13	217	0.000594856	0.000115412	0.0165593	9.63282e-05	2.7282e-05	Rnf125(0.64), Tnfaip3(0.54), Cbl(0.48), Herc2(0.48), Trim36(0.47), Hecw2(0.47), Hectd1(0.43), Rnf169(0.42), Rnf180(0.38), Mid1(0.37), Egr2(0.36), Birc3(0.35), Hectd2(0.35), Rc3h2(0.35), Rnf144b(0.34), Ubr2(0.34), Ubr4(0.33), Rnf38(0.33), Cblb(0.32), Rlim(0.29), Msl2(0.29), Trim39(0.29), Neurl3(0.29), Trim56(0.29), Ubr5(0.28), G2e3(0.28), Smurf1(0.27), Sh3rf1(0.26), Neurl1a(0.25), March7(0.25), Rn…
tubulin-glycine ligase activity	0.000190525	0.140001	2.71072e-14	8.48719e-13	217	0.000594856	0.000115412	0.0165593	9.63282e-05	2.7282e-05	Rnf125(0.64), Tnfaip3(0.54), Cbl(0.48), Herc2(0.48), Trim36(0.47), Hecw2(0.47), Hectd1(0.43), Rnf169(0.42), Rnf180(0.38), Mid1(0.37), Egr2(0.36), Birc3(0.35), Hectd2(0.35), Rc3h2(0.35), Rnf144b(0.34), Ubr2(0.34), Ubr4(0.33), Rnf38(0.33), Cblb(0.32), Rlim(0.29), Msl2(0.29), Trim39(0.29), Neurl3(0.29), Trim56(0.29), Ubr5(0.28), G2e3(0.28), Smurf1(0.27), Sh3rf1(0.26), Neurl1a(0.25), March7(0.25), Rn…
canonical Wnt signaling pathway	0.000112443	0.205842	3.13975e-14	9.74423e-13	99	0.019502	0.000155376	0.0013915	3.69572e-05	1.65609e-05	Wnt9b(1), Wnt11(0.6), Egf(0.56), Sox4(0.54), Fzd5(0.43), Fzd5(0.43), Smad3(0.4), Sdc1(0.39), Lrp6(0.38), Lrp6(0.38), Lrp6(0.38), Plpp3(0.36), Apc(0.35), Ptk7(0.34), Tcf7(0.31), Klf4(0.3), Fzd4(0.29), Fzd4(0.29), Fzd4(0.29), Snai2(0.27), Wnt2b(0.27), Ptpru(0.26), Dixdc1(0.24), Tcf7l2(0.23), Med12(0.23), Sox17(0.22), Kdm6a(0.22), Gsk3b(0.22), Gsk3b(0.22), Fzd2(0.22), Fzd2(0.22), Tbl1xr1(0.21), Wnt9…
Notch binding	0.000184807	0.445365	3.41471e-14	1.05054e-12	20	0.00550405	0.000975116	9.41303e-05	0.000747118	1.33217e-05	Notch1(0.64), Galnt11(0.56), Jag1(0.55), Jag1(0.55), Dll1(0.45), Dll1(0.45), Dll4(0.44), Dll4(0.44), Egfl7(0.37), Nov(0.34), Notch4(0.33), Aak1(0.25), 1810011O10Rik(0.24), Ncor2(0.23), Hif1an(0.15), Jag2(0.13), Jag2(0.13), Chac1(0.11), Adam17(0.09), Snw1(-0.04),
extrinsic component of cytoplasmic side of plasma membrane	7.20534e-05	0.270902	3.69609e-14	1.12731e-12	62	0.0269245	0.0106493	0.000121312	1.94838e-06	1.27719e-05	Ryr1(0.74), Itk(0.68), Bmx(0.67), Rgs1(0.66), Syk(0.63), Kcnab1(0.53), Fes(0.41), Fes(0.41), Errfi1(0.39), Cnr2(0.38), Btk(0.37), Fyn(0.37), Kcnab2(0.37), Fgr(0.36), Fermt2(0.34), Farp1(0.33), Snx18(0.32), Jak2(0.31), Tiam1(0.31), Abl2(0.3), Jak3(0.29), Styk1(0.27), Cyth1(0.26), Src(0.26), Tnk1(0.24), Iqgap1(0.22), Matk(0.21), Frk(0.2), Abl1(0.19), Cav2(0.16), Cav2(0.16), Cyth3(0.16), Srms(0.16),…
cytoplasmic vesicle	0.000285462	0.0923286	3.97618e-14	1.20237e-12	478	0.000924644	0.00141422	0.000653971	5.58588e-05	0.000208703	Mefv(0.9), Tlr6(0.88), Cxcr4(0.86), Arc(0.81), Cxxc4(0.74), Nptx1(0.73), Il1b(0.69), Nkd2(0.68), Dsc2(0.67), Ang(0.64), Notch1(0.64), C5ar1(0.63), Syk(0.63), Sema4c(0.62), Ngp(0.58), Adamts1(0.57), Gpnmb(0.57), Arfgef3(0.57), Kdr(0.51), Adgrf5(0.5), Myrip(0.5), Arrdc4(0.49), Itga5(0.48), Syt5(0.48), Tmem163(0.48), Trim36(0.47), Amotl1(0.47), Vgf(0.47), Dll1(0.45), Mmp14(0.45), Dysf(0.45), Tlr7(0.…
positive regulation of peptidyl-tyrosine phosphorylation	0.000151888	0.219565	4.49222e-14	1.3469e-12	86	0.0644095	0.00419732	1.35073e-05	3.33583e-06	6.83015e-05	Cd80(1.41), Il6(1.24), Lif(1.22), Il11(0.9), Csf3(0.76), Osm(0.69), Osm(0.69), Itgb3(0.67), Musk(0.67), Syk(0.63), Egf(0.56), Tlr4(0.55), Il6ra(0.54), Cd44(0.49), Cd44(0.49), Itga5(0.48), Efna5(0.46), Hgf(0.46), Pdgfb(0.45), Reln(0.45), Hcls1(0.4), Nod2(0.4), Kitl(0.37), Plpp3(0.36), Thbs4(0.35), Cd24a(0.34), Jak2(0.31), Rictor(0.31), Vegfa(0.29), Vegfa(0.29), Tgfb1(0.28), Ehd4(0.28), Pdgfra(0.27…
dendrite	0.000144231	0.110939	4.70816e-14	1.39979e-12	328	0.00360303	0.000418718	8.1163e-05	8.95563e-05	0.000933439	Igsf9b(1.05), Ntrk2(0.94), Nr1d1(0.89), Nr1d1(0.89), Kcnc2(0.86), Kcnc2(0.86), Hdc(0.84), Chl1(0.81), Plk2(0.7), Drd1(0.69), Nrgn(0.68), Pgr(0.66), Htr1b(0.65), Mmp3(0.65), Rapgef4(0.63), Itpr3(0.62), Ctla2a(0.61), Cdk5r1(0.59), Plk3(0.58), Gabrb1(0.56), Crmp1(0.55), Bsn(0.54), Alox5(0.53), Gnao1(0.53), Map1b(0.51), Ret(0.51), Cpeb4(0.51), Cpeb4(0.51), Cacna1c(0.5), Slc38a2(0.48), Elfn1(0.48), Ad…
rhythmic process	0.000286808	0.1861	5.74227e-14	1.69301e-12	113	0.0102253	0.000518809	0.000565578	8.71828e-05	3.30206e-05	Nr1d1(0.89), Ciart(0.85), Bhlhe41(0.74), Noct(0.59), Cdk5r1(0.59), Dbp(0.57), Twist1(0.57), Nfil3(0.54), Kmt2a(0.53), Rorb(0.49), Adcy1(0.48), Per1(0.45), Cry2(0.44), Nr1d2(0.44), Bhlhe40(0.43), Crebbp(0.4), Per3(0.4), Sirt1(0.4), Id3(0.39), Nrip1(0.39), Prkcg(0.36), Prox1(0.36), Hlf(0.35), Rock2(0.34), Setx(0.34), Rora(0.33), Tef(0.33), Ep300(0.33), Id1(0.32), Pml(0.32), Csnk1e(0.32), Kdm5b(0.29…
protein ubiquitination involved in ubiquitin-dependent protein catabolic process	0.000170765	0.178477	7.68017e-14	2.24566e-12	136	0.000238473	6.75478e-05	0.0188538	0.000210008	0.000161841	Cbl(0.48), Herc2(0.48), Klhl28(0.48), Abtb2(0.48), Hecw2(0.47), Hectd1(0.43), Rnf122(0.42), Hectd2(0.35), Rnf144b(0.34), Rnf144b(0.34), Ubr4(0.33), Gan(0.31), Ubr5(0.28), Smurf1(0.27), Smurf1(0.27), Smurf1(0.27), Gm15800(0.27), Rnf19b(0.25), Rmnd5a(0.24), Fbxo45(0.24), Klhl21(0.23), Rnf19a(0.22), Rnf146(0.22), Klhl11(0.22), Rnf165(0.21), Rnf111(0.2), Btbd3(0.2), Klhl15(0.2), Bfar(0.19), Trip12(0.…
transcription regulatory region sequence-specific DNA binding	0.000295368	0.283685	8.00732e-14	2.30631e-12	48	0.000501216	0.000364336	2.7669e-05	0.00971615	0.000268766	Atf3(0.99), Nr1d1(0.89), Ciart(0.85), Nfe2(0.82), Jmjd1c(0.68), Foxj1(0.67), Hr(0.61), Sox11(0.57), Sox11(0.57), Sox4(0.54), Tfap2a(0.49), Egr1(0.48), Per1(0.45), Cry2(0.44), Tal1(0.35), Pou2f1(0.33), Tnrc18(0.31), Mafk(0.3), Creb3l3(0.3), Ddit3(0.27), Kdm3a(0.24), Nfkb1(0.21), Per2(0.21), Bahd1(0.21), Nfe2l2(0.19), Gata3(0.18), Kdm3b(0.18), Nfatc2(0.15), Sfpq(0.13), Bahcc1(0.12), Mkl1(0.11), Arn…
positive regulation of neuron projection development	0.000229777	0.184263	8.01797e-14	2.30631e-12	115	0.0171666	0.00894019	1.11596e-05	9.40267e-06	0.000236907	Cxcl5(1.3), Il6(1.24), Lif(1.22), Ntrk2(0.94), Avil(0.76), Avil(0.76), Acsl6(0.72), Adamts1(0.57), Ngf(0.54), Ngf(0.54), Ret(0.51), Tenm3(0.51), Tenm3(0.51), Epha3(0.46), Cflar(0.45), Reln(0.45), Fes(0.41), Serpine2(0.41), Dbn1(0.4), Sirt1(0.4), Ankrd1(0.4), Fyn(0.37), Fgfr1(0.36), Fgfr1(0.36), Ptn(0.36), Qk(0.36), Sphk1(0.36), Rapgef2(0.36), Cd24a(0.34), Cd24a(0.34), Ptk7(0.34), Setx(0.34), Tiam…
caveola	9.5191e-05	0.216668	8.34645e-14	2.38143e-12	88	0.01717	0.000689773	8.00639e-06	0.000524179	0.000171858	Ptgs2(1.16), Sele(0.85), Slc2a3(0.77), P2ry12(0.74), Drd1(0.69), Nos3(0.51), Adrb2(0.47), Dlc1(0.46), Cacna1h(0.45), Akap6(0.44), Irs1(0.4), Tgfbr1(0.39), Lrp6(0.38), Lrp6(0.38), Adcyap1r1(0.35), Atp1a2(0.35), Igf1r(0.33), Bmpr2(0.32), Insr(0.32), Insr(0.32), Jak2(0.31), Cdh13(0.3), Hk1(0.29), Ptrf(0.29), Ptrf(0.29), Ptrf(0.29), Kcnd3(0.27), Nos1ap(0.27), Slc2a1(0.26), Src(0.26), Src(0.26), Erbb4…
regulation of gene expression	0.000255749	0.145579	9.5449e-14	2.70159e-12	184	0.0638791	7.90647e-05	3.56418e-05	0.000118066	0.00023564	Gdnf(1.1), Nr4a2(0.91), Nfe2(0.82), Stx1b(0.69), Peg3(0.67), Plagl1(0.65), Notch1(0.64), Stab2(0.64), G6pc(0.58), Kmt2a(0.53), Zc3h12a(0.46), Reln(0.45), Kmt2d(0.45), Rbm4(0.44), Gata6(0.43), Gli3(0.43), Kdm6b(0.43), Irs1(0.4), Lmx1b(0.4), Tshz3(0.4), Tgfbr1(0.39), Setd2(0.37), Msantd1(0.37), Fgfr1(0.36), Prox1(0.36), Prox1(0.36), Hey2(0.35), Rc3h2(0.35), Hif1a(0.34), Hif1a(0.34), Nov(0.34), Nfkb…
histone H3-K9 demethylation	0.000424163	0.503908	9.87894e-14	2.77394e-12	15	0.00520975	0.000752695	0.000730812	0.000300498	2.18064e-05	Jmjd1c(0.68), Hr(0.61), Hsf4(0.44), Kdm7a(0.37), Kdm7a(0.37), Kdm3a(0.24), Kdm3a(0.24), Phf8(0.21), Kdm3b(0.18), Phf2(0.17), Kdm1a(0.17), Kdm1a(0.17), Kdm4c(0.08), Kdm4c(0.08), Kdm4b(0.07),
ephrin receptor signaling pathway	0.00017497	0.323435	1.08826e-13	3.0317e-12	37	0.0170242	0.00115715	2.28651e-06	0.000270587	0.000691905	Ephb3(0.69), Cdk5r1(0.59), Efnb2(0.48), Efnb2(0.48), Efna5(0.46), Efna5(0.46), Epha3(0.46), Epha3(0.46), Epha2(0.41), Epha2(0.41), Epha2(0.41), Ephb2(0.35), Tiam1(0.31), Epha1(0.3), Epha4(0.29), Ephb6(0.27), Nck2(0.24), Ephb1(0.23), Ephb1(0.23), Efnb1(0.2), Efna1(0.18), Efna1(0.18), Ptpn11(0.16), Ngef(0.11), Ngef(0.11), Sipa1l1(0.11), Git1(0.08), Efna4(0.06), Anks1(0.06), Ephb4(0.04), Ephb4(0.04)…
tubulin-glutamic acid ligase activity	0.000259634	0.136933	1.6036e-13	4.43245e-12	220	0.000666548	0.00022911	0.0356428	0.000123457	1.98918e-05	Rnf125(0.64), Tnfaip3(0.54), Cbl(0.48), Herc2(0.48), Trim36(0.47), Hecw2(0.47), Hectd1(0.43), Rnf169(0.42), Rnf180(0.38), Mid1(0.37), Egr2(0.36), Birc3(0.35), Hectd2(0.35), Rc3h2(0.35), Rnf144b(0.34), Ubr2(0.34), Ubr4(0.33), Rnf38(0.33), Cblb(0.32), Rlim(0.29), Msl2(0.29), Trim39(0.29), Neurl3(0.29), Trim56(0.29), Ubr5(0.28), G2e3(0.28), Smurf1(0.27), Sh3rf1(0.26), Neurl1a(0.25), March7(0.25), Rn…
immune system process	7.03699e-05	0.126669	2.22244e-13	6.09534e-12	294	0.0292013	0.0096873	0.000774015	1.87218e-07	0.000101991	Clec4d(1.16), Clec4e(1.14), Acod1(1.12), Cd300lf(1.12), H2-Q10(0.95), Lilrb4a(0.92), Tnfsf18(0.92), Mefv(0.9), Tlr6(0.88), Cd300lb(0.87), S100a9(0.76), Iigp1(0.76), Nlrp6(0.76), Il1f6(0.75), S100a8(0.74), Aim2(0.72), Slpi(0.71), Tlr8(0.71), Havcr2(0.71), Cd84(0.69), Itk(0.68), Rnf125(0.64), Syk(0.63), Amica1(0.62), Pag1(0.56), Tlr4(0.55), Cd300ld(0.55), Camk4(0.54), Fcamr(0.53), Ptpn22(0.52), Map…
chemotaxis	7.07734e-05	0.236819	2.3258e-13	6.30019e-12	87	0.0163038	0.00102592	0.00633903	0.000116152	8.55021e-07	Cxcl5(1.3), Cxcl3(1.29), Cxcr2(1.09), Cxcr2(1.09), Fpr1(0.97), Cxcr4(0.86), Ccl11(0.83), Ccl6(0.82), C5ar2(0.8), S100a9(0.76), S100a8(0.74), Pf4(0.71), C5ar1(0.63), Fpr2(0.63), Cxcl2(0.62), Cxcl13(0.61), Ackr4(0.61), Ccr1(0.6), S1pr1(0.59), Ackr2(0.59), Ccl7(0.56), Ccl20(0.55), Ccl20(0.55), Pik3c2g(0.52), Flt1(0.5), Ptafr(0.42), Fes(0.41), Cxcl10(0.39), Robo3(0.36), Slit2(0.31), Robo1(0.28), Pdgf…
cell-cell signaling	9.30071e-05	0.29157	2.33274e-13	6.30019e-12	56	0.237006	0.0048905	4.42297e-06	4.71751e-05	2.9555e-06	Wnt9b(1), Tnfsf18(0.92), Nfe2(0.82), Ereg(0.79), Adra1d(0.66), Gja1(0.63), Gja1(0.63), Cxcl13(0.61), Ccr1(0.6), Wnt11(0.6), Edn1(0.53), Npy(0.48), Adrb2(0.47), Dll1(0.45), Wisp1(0.38), Gjc1(0.37), Gjc1(0.37), Ctgf(0.35), Cxcl14(0.35), Lnpep(0.33), Fgfr2(0.32), Stab1(0.31), Gja4(0.27), Wnt2b(0.27), Celsr1(0.26), Cyr61(0.26), Tac1(0.22), Tnfsf9(0.22), Fzd2(0.22), Adra1b(0.18), Fgfbp1(0.18), Lhx1(0.…
kidney development	0.00021881	0.183044	2.40489e-13	6.44583e-12	117	0.0823337	1.91412e-05	1.73002e-05	0.00678411	2.54418e-05	Wnt9b(1), Wnt11(0.6), Adamts1(0.57), Arid5b(0.54), Sulf1(0.52), Tfap2a(0.49), Fat4(0.49), Bcl2l11(0.46), Gli3(0.43), Foxd1(0.42), Tns2(0.42), Pcnt(0.41), Tgfbr1(0.39), Tiparp(0.39), Itga8(0.39), Stra6(0.37), Schip1(0.36), Apc(0.35), Aqp11(0.33), Foxc1(0.32), Tet2(0.32), Fbn1(0.3), Pkd2(0.3), Pkd2(0.3), Myo1e(0.3), Vegfa(0.29), Ren1(0.28), Ovol1(0.25), Pkd1(0.25), Pkd1(0.25), Wt1(0.25), Wt1(0.25),…
growth cone	0.00030044	0.185085	2.68972e-13	7.15507e-12	111	0.00254796	0.00125786	2.16575e-05	0.00525326	0.000124191	Ntrk2(0.94), Cxcr4(0.86), Pcdh9(0.73), Ang(0.64), Rapgef4(0.63), Cdk5r1(0.59), Crmp1(0.55), Ncam1(0.52), Map1b(0.51), Utrn(0.5), Cbl(0.48), Flna(0.42), Pcdhgb1(0.41), Dbn1(0.4), Sirt1(0.4), Tshz3(0.4), Apc(0.35), Apc(0.35), Pclo(0.34), Setx(0.34), Ptbp2(0.33), Csnk1e(0.32), Snx18(0.32), Itga3(0.3), Clu(0.29), Ppp1r9b(0.27), Dpysl2(0.26), Klc1(0.25), Boc(0.25), Tsc1(0.23), Lrrk2(0.23), Usp9x(0.22)…
ephrin receptor binding	0.00030235	0.324447	6.08189e-13	1.6006e-11	35	0.00171896	0.000453152	2.37837e-05	0.00106339	0.00619219	Cdk5r1(0.59), Cbl(0.48), Cbl(0.48), Efnb2(0.48), Efnb2(0.48), Efna5(0.46), Efna5(0.46), Fyn(0.37), Tiam1(0.31), Epha4(0.29), Src(0.26), Src(0.26), Pik3cg(0.22), Efnb1(0.2), Ptpn1(0.19), Efna1(0.18), Efna1(0.18), Shc1(0.16), Shc1(0.16), Chn1(0.15), Ngef(0.11), Ngef(0.11), Sipa1l1(0.11), Aqp1(0.08), Efna4(0.06), Efna4(0.06), Sdcbp(0.06), Anks1(0.06), Crk(0.03), Crk(0.03), Grb2(0.03), Grb2(0.03), Nc…
ubiquitin-protein transferase activity	0.000240592	0.116144	6.10745e-13	1.6006e-11	334	0.000853175	0.000560538	0.0146744	4.28865e-05	0.00036131	Rnf125(0.64), Asb4(0.61), Tnfaip3(0.54), Fbxo32(0.52), Bach1(0.48), Cbl(0.48), Herc2(0.48), Herc2(0.48), Klhl28(0.48), Trim36(0.47), Hecw2(0.47), Klhl29(0.46), Spsb1(0.44), Hectd1(0.43), Fbxo2(0.43), Lonrf1(0.41), Birc3(0.35), Birc3(0.35), Klhl24(0.35), Hectd2(0.35), Hectd2(0.35), Rc3h2(0.35), Rnf144b(0.34), Ubr2(0.34), Birc5(0.33), Ubr4(0.33), Rnf38(0.33), Cblb(0.32), Klhl23(0.32), Gan(0.31), Na…
palate development	0.000308488	0.233685	6.87748e-13	1.78916e-11	70	0.159823	0.000279421	0.000176658	6.64763e-06	0.000258328	Inhba(1.17), Wnt9b(1), Col11a2(0.83), Csrnp1(0.78), Ephb3(0.69), Wnt11(0.6), Wnt11(0.6), Chd7(0.59), Chd7(0.59), Arid5b(0.54), Tfap2a(0.49), Gli3(0.43), Tgfbr1(0.39), Tgfbr1(0.39), Tiparp(0.39), Lrp6(0.38), Schip1(0.36), Osr2(0.36), Ephb2(0.35), Tbx3(0.35), Gabrb3(0.34), Tgfbr3(0.33), Tgfb3(0.3), Bcor(0.28), Pdgfra(0.27), Snai2(0.27), Snai2(0.27), Mef2c(0.26), Ski(0.24), Acvr2b(0.22), Acvr2b(0.22…
actin filament binding	0.000148083	0.182195	7.05264e-13	1.82133e-11	127	0.000123553	0.00295998	0.000402773	0.00849834	0.000115246	Add2(0.83), Gas7(0.62), Eps8l1(0.6), Adssl1(0.57), Ttn(0.57), Ttn(0.57), Utrn(0.5), Flna(0.42), Dbn1(0.4), Myh9(0.39), Myo1b(0.39), Shroom3(0.37), Tln1(0.36), Wipf2(0.36), Syne2(0.36), Tln2(0.35), Sptb(0.32), Sptb(0.32), Syne1(0.32), Syne3(0.31), Fmnl1(0.3), Myo1e(0.3), Pls3(0.3), Coro2a(0.3), Fgd4(0.28), Ppp1r9b(0.27), Ppp1r9b(0.27), Myo9b(0.26), Vcl(0.26), Rcsd1(0.26), Ctnna1(0.25), Egfr(0.25),…
bicellular tight junction	0.000467818	0.174463	7.44435e-13	1.90856e-11	120	0.00184988	0.0163951	5.58361e-05	0.000197776	0.000366054	Cldn6(0.72), Cldn4(0.69), Cldn4(0.69), Amica1(0.62), Cdh5(0.59), Clmp(0.56), Cldn5(0.49), Cldn5(0.49), Amotl1(0.47), Amotl1(0.47), Frmd4a(0.45), Fzd5(0.43), Cldn7(0.43), Tjp1(0.4), Tjp1(0.4), Cldn23(0.4), Tgfbr1(0.39), Synpo(0.38), Lin7a(0.38), Pmp22(0.37), Wnk3(0.37), Rapgef2(0.36), Adcyap1r1(0.35), Apc(0.35), Esam(0.33), Ash1l(0.32), Magi3(0.3), Ubn1(0.3), Pard6g(0.28), Strn(0.28), Jam2(0.27), …
protein dephosphorylation	0.000583283	0.158696	8.07813e-13	2.05614e-11	144	0.000371774	0.00844824	0.00530413	0.00055211	1.24243e-05	Dusp10(0.72), Dusp1(0.57), Ptpn22(0.52), Ptpn22(0.52), Ptprj(0.43), Ptpn14(0.42), Cttnbp2nl(0.4), Cttnbp2nl(0.4), Ptpn12(0.39), Ptpn12(0.39), Ptprb(0.39), Ptprm(0.38), Dusp14(0.36), Dusp7(0.36), Dusp6(0.35), Dusp6(0.35), Dusp8(0.32), Ptpn13(0.31), Ptprc(0.31), Ctdspl2(0.31), Ppp1r12a(0.29), Ppp1r12a(0.29), Ctdsp2(0.27), Ptpru(0.26), Ssh2(0.26), Plpp1(0.25), Plpp1(0.25), Ptprd(0.25), Ptprg(0.25), …
cell-cell adherens junction	0.000219426	0.12797	1.18739e-12	3.0007e-11	304	8.18271e-07	0.00962043	0.00577649	0.00516087	0.000279317	Hspa1a(1.41), Dsc2(0.67), Xirp1(0.65), Tmem2(0.63), Eps8l1(0.6), Plec(0.56), Dnajb1(0.56), Ahnak(0.52), Gprc5a(0.51), Fat2(0.51), Cbl(0.48), Flna(0.42), Epha2(0.41), Smad7(0.41), Erc1(0.41), Flnb(0.41), Tjp1(0.4), Tjp1(0.4), Dbn1(0.4), Myh9(0.39), Myh9(0.39), Myo1b(0.39), Cdh1(0.38), Cdh1(0.38), Evpl(0.38), Ptprm(0.38), Fmnl2(0.38), Tln1(0.36), Apc(0.35), Bag3(0.35), Ddx6(0.34), Lama3(0.34), Phld…
adenylate cyclase-activating G-protein coupled receptor signaling pathway	0.000262648	0.288693	1.28303e-12	3.21941e-11	45	0.0119981	0.000318524	0.000181618	0.000532387	0.000842167	Ptger2(0.89), Drd1(0.69), Ptger4(0.55), Adcy1(0.48), Adrb2(0.47), Adrb2(0.47), Adrb2(0.47), Ptgir(0.41), Ptgir(0.41), Tshr(0.39), Adora2b(0.32), Calcr(0.32), Calcr(0.32), Calcrl(0.32), Ptgfr(0.29), Adcy3(0.29), S1pr4(0.28), Adcy4(0.28), Gna13(0.2), Gnal(0.2), Adcy9(0.19), Adcy9(0.19), Adcy9(0.19), Adora2a(0.19), Adora2a(0.19), Adora2a(0.19), Adora2a(0.19), Gnas(0.19), Gnas(0.19), Gnas(0.19), Calc…
Notch signaling pathway	6.82315e-05	0.195574	1.56548e-12	3.90047e-11	120	0.41006	0.0010498	1.35497e-06	3.65537e-05	0.000142553	Cdh6(0.83), Xirp1(0.65), Notch1(0.64), Notch1(0.64), Notch1(0.64), Notch1(0.64), Galnt11(0.56), Jag1(0.55), Jag1(0.55), Jag1(0.55), Jag1(0.55), Fat4(0.49), Dll1(0.45), Dll1(0.45), Dll1(0.45), Dll1(0.45), Dll4(0.44), S1pr3(0.43), Hey1(0.43), Hey1(0.43), Hey1(0.43), Kcna5(0.4), Rcan2(0.39), Nrarp(0.37), Hey2(0.35), Hey2(0.35), Bmp2(0.34), Notch4(0.33), Foxc1(0.32), Notch3(0.32), Notch3(0.32), Notch…
cytoskeleton organization	0.000564976	0.188404	2.05886e-12	5.09387e-11	100	0.0152962	0.00185619	0.000181815	0.000408766	0.0002102	Ccl11(0.83), Arc(0.81), Avil(0.76), Tnik(0.47), Dst(0.46), Dlc1(0.46), Cntnap1(0.44), Fmnl2(0.38), Rhou(0.37), Pclo(0.34), Mast1(0.32), Phip(0.31), Phip(0.31), Gan(0.31), Syne3(0.31), Fmnl1(0.3), Pxn(0.29), Ablim1(0.29), Nectin2(0.28), Ccl2(0.27), Mical2(0.27), Dpysl2(0.26), Krt4(0.26), Brwd1(0.26), Brwd1(0.26), Zranb1(0.26), Zranb1(0.26), Rock1(0.25), Strip2(0.25), Fmnl3(0.24), Zak(0.24), Znrf1(…
regulation of actin cytoskeleton organization	0.000397269	0.281099	2.1094e-12	5.18268e-11	45	0.00392109	0.00940229	0.000258549	0.00151425	2.5562e-05	Pak3(0.97), Itgb3(0.67), Cdk5r1(0.59), Efna5(0.46), Efna5(0.46), Epha3(0.46), Dlc1(0.46), Lrp1(0.45), Ccdc88a(0.43), Fgr(0.36), Gpm6b(0.34), Rock2(0.34), Rictor(0.31), Sh3bgrl3(0.3), Celsr1(0.26), Rock1(0.25), Dixdc1(0.24), Tgfb2(0.23), Tsc1(0.23), Tsc1(0.23), Arhgap18(0.21), Abl1(0.19), Abl1(0.19), Pdgfrb(0.19), Vangl2(0.16), Baiap2(0.16), Coro1a(0.15), Fscn1(0.12), Pam(0.12), Arhgef19(0.12), Pr…
transcription factor activity, RNA polymerase II distal enhancer sequence-specific binding	0.000336936	0.286544	2.18974e-12	5.34296e-11	45	0.0891401	0.000560306	7.80795e-06	0.00167777	0.000143942	Bhlhe41(0.74), Gata5(0.71), Jun(0.69), Sox7(0.62), Sox11(0.57), Foxf1(0.56), Gata6(0.43), Bhlhe40(0.43), Prox1(0.36), Hif1a(0.34), Foxp1(0.34), Foxp1(0.34), Foxc1(0.32), Ahr(0.28), Snai2(0.27), Mef2a(0.26), Mef2c(0.26), Spi1(0.24), Arnt(0.22), Sox17(0.22), Rela(0.21), Rela(0.21), Creb1(0.19), Meis1(0.19), Tle4(0.19), Srf(0.16), Tead2(0.15), Pknox1(0.14), Hnf1b(0.14), Hnf1b(0.14), Cebpb(0.1), Nfat…
RNA polymerase II transcription factor binding	0.000634667	0.285372	2.26999e-12	5.50085e-11	43	0.00106194	0.000273397	0.00132921	0.00410995	0.000491614	Gata5(0.71), Id4(0.51), Crebbp(0.4), Crebbp(0.4), Hcls1(0.4), Dact1(0.4), Ankrd1(0.4), Tal1(0.35), Tbx3(0.35), Ep300(0.33), Spen(0.31), Lpin1(0.3), Klf4(0.3), Klf4(0.3), Mef2a(0.26), Spi1(0.24), Tead3(0.23), Hdac5(0.22), Gsk3b(0.22), Gata2(0.2), Gata3(0.18), Kdm1a(0.17), Elk1(0.15), Kdm5c(0.15), Atf4(0.12), Zfpm1(0.12), Zfpm2(0.12), Nfatc1(0.1), Wwp2(0.1), Wwp2(0.1), Spop(0.09), Hdac1(0.09), Dhx9…
negative regulation of neuron apoptotic process	0.000685042	0.162596	2.30986e-12	5.55938e-11	133	0.00208047	0.000264741	0.0019863	0.000759952	0.00102062	Gdnf(1.1), Gdnf(1.1), Nr4a3(0.99), Ntrk2(0.94), Nr4a2(0.91), Chl1(0.81), Adam8(0.71), Jun(0.69), C5ar1(0.63), Hsph1(0.63), Cntfr(0.62), Ngf(0.54), Ngf(0.54), Kdr(0.51), Cpeb4(0.51), Tfap2a(0.49), Nes(0.48), Tox3(0.46), Lrp1(0.45), Hipk2(0.42), Mt1(0.42), Mt3(0.4), Sirt1(0.4), Fyn(0.37), Prkcg(0.36), Erbb3(0.35), Gabrb3(0.34), Hif1a(0.34), Birc5(0.33), Jak2(0.31), Tgfb3(0.3), Nrbp2(0.3), Pik3ca(0.…
non-membrane spanning protein tyrosine kinase activity	0.000437561	0.266101	2.53407e-12	6.0578e-11	52	0.00330225	0.0191214	0.000536979	9.32046e-05	0.000135533	Itk(0.68), Itk(0.68), Bmx(0.67), Bmx(0.67), Syk(0.63), Syk(0.63), Fes(0.41), Fes(0.41), Btk(0.37), Fyn(0.37), Fgr(0.36), Fgr(0.36), Peak1(0.34), Jak2(0.31), Abl2(0.3), Dyrk1a(0.29), Jak3(0.29), Styk1(0.27), Src(0.26), Tnk1(0.24), Matk(0.21), Frk(0.2), Abl1(0.19), Abl1(0.19), Wee1(0.18), Srms(0.16), Tec(0.16), Tec(0.16), D8Ertd82e(0.16), Baz1b(0.15), Ptk2b(0.12), Ptk2b(0.12), Tnk2(0.12), Jak1(0.11…
positive regulation of endothelial cell proliferation	0.000449443	0.240504	3.08155e-12	7.31713e-11	62	0.0506769	0.00149595	3.17143e-05	0.000394508	0.000322883	Ccl11(0.83), Jun(0.69), Pgf(0.69), Pgf(0.69), Itgb3(0.67), Ang(0.64), Vash2(0.64), Nr4a1(0.58), Arg1(0.57), Egr3(0.54), Kdr(0.51), Pdgfb(0.45), Pdgfb(0.45), Sirt1(0.4), F3(0.38), Flt4(0.38), Nrarp(0.37), Egfl7(0.37), Prox1(0.36), Thbs4(0.35), Bmp2(0.34), Bmpr2(0.32), Fgf2(0.31), Fgf2(0.31), Rictor(0.31), Cdh13(0.3), Nf1(0.29), Vegfa(0.29), Vegfa(0.29), Prkd2(0.29), Ccl2(0.27), Ecm1(0.21), Prkd1(0…
positive regulation of smooth muscle cell migration	0.000616128	0.2947	3.35178e-12	7.90573e-11	40	0.0058957	0.00321801	0.000368633	0.000111858	0.00118668	Has2(1.55), Itgb3(0.67), Pgr(0.66), Sema6d(0.65), Rapgef4(0.63), Ptger4(0.55), Egr1(0.48), Pdgfb(0.45), Pdgfb(0.45), Itga2(0.44), Ager(0.42), F3(0.38), P2ry2(0.28), Hdac4(0.27), Src(0.26), Bcl2(0.24), Cyp1b1(0.24), Il6st(0.21), Rapgef3(0.21), Pdgfrb(0.19), Pdgfrb(0.19), Pdgfrb(0.19), Tmsb4x(0.16), Nox4(0.16), Camk2d(0.15), Igf1(0.12), P2ry6(0.08), Rab5a(0.07), Foxo4(0.05), Il18(0.04), Rps6kb1(0.0…
neuron migration	0.000408086	0.184274	3.7807e-12	8.85835e-11	105	0.0423298	0.0236672	2.79352e-05	9.64644e-05	6.04622e-05	Mdga1(0.95), Mdga1(0.95), Ntrk2(0.94), Nr4a2(0.91), Cxcr4(0.86), Cxcr4(0.86), Chl1(0.81), Prkg1(0.72), Celsr3(0.66), Gja1(0.63), Cdk5r1(0.59), Cdk5r1(0.59), Twist1(0.57), Cckar(0.56), Nav1(0.46), Reln(0.45), Reln(0.45), Reln(0.45), Sema3a(0.42), Pcnt(0.41), Lmx1b(0.4), Ddit4(0.4), Nrp2(0.38), Fyn(0.37), Fyn(0.37), Robo3(0.36), Rapgef2(0.36), Ntrk3(0.35), Apbb2(0.34), Cdkl5(0.32), Itga3(0.3), Ndel…
cellular response to lipopolysaccharide	0.000326478	0.197894	3.86819e-12	9.00372e-11	95	0.0102323	0.00237621	0.00141822	0.000316109	8.5369e-05	Cd80(1.41), Il6(1.24), Il6(1.24), Acod1(1.12), Acod1(1.12), Nr1d1(0.89), Cd300lb(0.87), Havcr2(0.71), Pde4b(0.68), Tlr4(0.55), Tlr4(0.55), Tnfaip3(0.54), Serpine1(0.52), Mrc1(0.51), Sbno2(0.48), Nlrp3(0.48), Zc3h12a(0.46), Zc3h12a(0.46), Zc3h12a(0.46), Nos2(0.45), Ankrd1(0.4), Ankrd1(0.4), Cxcl10(0.39), Zfp36(0.37), Zfp36(0.37), Bcr(0.35), Pde4d(0.33), Jak2(0.31), Cd14(0.3), Cd14(0.3), Dab2ip(0.3…
negative regulation of signal transduction	0.000523471	0.274082	5.04445e-12	1.16649e-10	46	0.0893593	0.00343815	0.000594012	2.37316e-06	0.000401112	Rgs18(1.29), Nlrp12(1.12), Socs3(0.85), Rgs16(0.83), Rgs1(0.66), Rgs9(0.58), Rgs7(0.54), Rgs2(0.51), Socs5(0.44), Ddit4(0.4), Inpp5d(0.37), Socs2(0.36), Erbb3(0.35), Rgs4(0.3), Ldlrad4(0.25), Rgs7bp(0.25), Rgs3(0.24), Pmepa1(0.24), Scai(0.24), Cish(0.22), Socs1(0.22), Gsk3b(0.22), Rgs5(0.19), Arrb2(0.19), Socs7(0.18), Arrb1(0.17), Cav1(0.16), Socs6(0.16), Socs4(0.16), Ubash3b(0.16), Acvr1(0.14), …
Rab guanyl-nucleotide exchange factor activity	0.000839705	0.303368	5.12383e-12	1.17715e-10	37	0.000592068	0.000765999	0.00630281	0.00121173	0.00053161	Dennd2c(0.39), Dennd3(0.37), Dennd3(0.37), Dennd5a(0.23), Rabgef1(0.23), Dennd4b(0.23), Dennd2a(0.22), Dennd5b(0.21), Dennd1c(0.19), Rab3gap2(0.19), Rgp1(0.19), Rgp1(0.19), St5(0.17), Dennd4a(0.17), Rab3il1(0.16), Ric1(0.16), Dennd4c(0.15), Dennd4c(0.15), Sbf2(0.14), Dennd2d(0.13), Als2(0.12), Rin3(0.1), Madd(0.09), Madd(0.09), Sbf1(0.08), Rab3ip(0.06), Dennd1a(0.04), Dennd1a(0.04), Rab3gap1(0.03…
beta-catenin binding	0.000828106	0.191594	5.50513e-12	1.25659e-10	93	0.00118628	0.00093738	0.00214561	0.0114647	4.61977e-05	Cdh5(0.59), Nos3(0.51), Nos2(0.45), Gli3(0.43), Ptprj(0.43), Kdm6b(0.43), Smad7(0.41), Smad3(0.4), Dact1(0.4), Dact1(0.4), Cdh1(0.38), Cdh1(0.38), Esr1(0.37), Apc(0.35), Apc(0.35), Apc(0.35), Apc2(0.34), Apc2(0.34), Rora(0.33), Ep300(0.33), Tcf7(0.31), Klf4(0.3), Pxn(0.29), Ptpru(0.26), Ptpru(0.26), Ctnna1(0.25), Foxo1(0.25), Kank1(0.25), Tcf7l2(0.23), Tcf7l2(0.23), Tcf7l2(0.23), Med12(0.23), Sox…
branching morphogenesis of an epithelial tube	0.000830852	0.313913	9.15531e-12	2.07638e-10	34	0.020934	0.00327684	8.85071e-06	0.0010297	0.00188514	Wnt9b(1), Notch1(0.64), Mycn(0.63), Egf(0.56), Kdr(0.51), Mmp14(0.45), Spry2(0.44), Gli3(0.43), Rasip1(0.43), Lama5(0.42), Slit2(0.31), Pxn(0.29), Vegfa(0.29), Pkd1(0.25), Pkd1(0.25), Clic4(0.25), Tmem67(0.23), Timeless(0.22), B4galt1(0.18), Dicer1(0.16), Hnf1b(0.14), Igf1(0.12), Met(0.1), Nkx3-1(0.09), Bmp7(0.07), Pak1(0.06), Sema5a(0.03), Bmp4(0.01), Casr(-0.06), Mgp(-0.09), Ppp1ca(-0.13), Mks1…
activation of MAPK activity	0.000509136	0.240127	9.45205e-12	2.13002e-10	62	0.0521192	0.00140435	4.63818e-05	0.000343051	0.00097719	Prok1(0.74), Thbs1(0.72), Il1b(0.69), Syk(0.63), Syk(0.63), Egf(0.56), Tlr4(0.55), Map2k6(0.55), Map2k6(0.55), Hgf(0.46), Fgf1(0.45), Plce1(0.39), Ntrk3(0.35), Map3k5(0.35), Bmp2(0.34), Insr(0.32), P2rx7(0.32), Ptprc(0.31), Tgfa(0.3), Tgfa(0.3), Tgfb3(0.3), Pxn(0.29), Spag9(0.26), Lrrk2(0.23), Map2k3(0.19), Map2k3(0.19), Cspg4(0.19), Efna1(0.18), Gab1(0.17), Kit(0.17), Arrb1(0.17), Ptpn11(0.16), …
SH3 domain binding	0.000573523	0.179769	9.84418e-12	2.20435e-10	108	0.0132929	0.00260795	0.000868896	0.00141609	5.39293e-05	Pak3(0.97), Sgip1(0.75), Gja1(0.63), Shank3(0.61), Cit(0.6), Ptpn22(0.52), Arhgap31(0.49), Cbl(0.48), Cbl(0.48), Cntnap1(0.44), Sh3bp5(0.42), Hcls1(0.4), Hcls1(0.4), Adam19(0.39), Ptpn12(0.39), Errfi1(0.39), Inpp5d(0.37), Qk(0.36), Ncf1(0.34), Cblb(0.32), Cttnbp2(0.3), Dab2ip(0.3), Trp53bp2(0.29), Picalm(0.24), Dock1(0.23), Was(0.22), Sh2d2a(0.22), Lrp2(0.21), Mical1(0.2), Abl1(0.19), Adam12(0.18…
animal organ morphogenesis	0.000669578	0.201648	9.98364e-12	2.22152e-10	84	0.0224847	0.00124262	0.000160647	0.00144331	0.000351344	Wnt9b(1), Cxcr4(0.86), Ereg(0.79), Slc26a4(0.78), Gata5(0.71), Sycp2(0.68), Wnt11(0.6), Foxf1(0.56), Slit3(0.56), Slit3(0.56), Jag1(0.55), Efnb2(0.48), Dll1(0.45), Lama5(0.42), Rdh10(0.37), Ephb2(0.35), Fli1(0.35), Tbx3(0.35), Bmp2(0.34), Igf1r(0.33), Ep300(0.33), Fgfr2(0.32), Insr(0.32), Prkar1b(0.32), Hhex(0.31), Tgfb3(0.3), Notch2(0.28), Pdgfa(0.28), Pdgfa(0.28), Tgfb1(0.28), Pdgfra(0.27), Trp…
protein complex binding	0.000880785	0.101565	1.06867e-11	2.3631e-10	333	0.00260598	0.000851523	0.000535864	0.0064623	0.000509353	Nog(0.96), Plk2(0.7), Tub(0.7), Drd1(0.69), Mmp3(0.65), Rapgef4(0.63), Mmp9(0.59), Nptxr(0.59), Rgs9(0.58), Malat1(0.57), Gnao1(0.53), Map1b(0.51), Adrb2(0.47), Cflar(0.45), Lrp1(0.45), Itga2(0.44), Flna(0.42), Hcls1(0.4), Pros1(0.39), Rest(0.39), Tgfbr1(0.39), Esr1(0.37), Fyn(0.37), Kcnq1ot1(0.37), Fgfr1(0.36), Tln1(0.36), Apc(0.35), Bag3(0.35), Bag3(0.35), Hif1a(0.34), Rarb(0.34), Nfkbia(0.33),…
semaphorin-plexin signaling pathway	0.000522833	0.29477	1.15696e-11	2.54244e-10	40	0.0081496	0.0190569	7.73842e-06	0.00207169	0.000513812	Plxna2(0.69), Sema3e(0.69), Sema6d(0.65), Sema4c(0.62), Crmp1(0.55), Crmp1(0.55), Plxna4(0.54), Plxna4(0.54), Plxnc1(0.45), Sema3a(0.42), Sema6b(0.42), Flna(0.42), Flna(0.42), Flna(0.42), Sema5b(0.39), Plxnb1(0.39), Plxnb1(0.39), Plxnd1(0.32), Plxnd1(0.32), Sema3d(0.31), Sema3g(0.3), Plxna1(0.26), Sema6a(0.26), Sema4b(0.22), Sema4g(0.22), Met(0.1), Met(0.1), Rac1(0.06), Sema5a(0.03), Sema4d(0.01)…
histone demethylase activity (H3-K9 specific)	0.00123054	0.523271	1.32373e-11	2.89096e-10	12	0.00760359	0.00091539	0.00318689	0.000649765	0.000318322	Jmjd1c(0.68), Hr(0.61), Kdm7a(0.37), Kdm7a(0.37), Kdm3a(0.24), Phf8(0.21), Kdm3b(0.18), Phf2(0.17), Phf2(0.17), Kdm1a(0.17), Kdm4c(0.08), Kdm4b(0.07),
stress fiber	0.000221966	0.25596	1.35284e-11	2.93641e-10	63	0.00908107	0.0119531	0.000912288	0.00132792	1.64195e-05	Acta1(0.74), Mst1r(0.47), Sh2b2(0.46), Dlc1(0.46), Flnb(0.41), Myh9(0.39), Myh9(0.39), Fermt2(0.34), Pstpip1(0.31), Pdlim7(0.3), Pxn(0.29), Ablim1(0.29), Sept5(0.28), Vcl(0.26), Shroom4(0.25), Actn1(0.24), Actn1(0.24), Actn1(0.24), Lima1(0.22), Sept9(0.21), Myh10(0.21), Myh10(0.21), Myh10(0.21), Myh11(0.19), Mprip(0.19), Tpm4(0.18), Ptpn11(0.16), Nox4(0.16), Actn4(0.16), Actn4(0.16), Palld(0.16),…
Rho protein signal transduction	0.0007697	0.274924	1.37065e-11	2.95693e-10	44	0.00282596	0.0029585	0.000563759	0.000222613	0.00460901	Eps8l1(0.6), Srgap1(0.53), Ednra(0.48), Cdc42ep4(0.43), Cdc42ep3(0.43), Kalrn(0.39), Rhoj(0.38), Rock2(0.34), Cdh13(0.3), Gm14137(0.27), Celsr1(0.26), Myo9b(0.26), Myo9b(0.26), Pecam1(0.26), Bcl6(0.25), Rock1(0.25), Arhgap32(0.25), Cdc42ep2(0.23), Cnksr1(0.23), Gna13(0.2), Agtr1a(0.17), Ctnnal1(0.17), Arhgef11(0.17), Vangl2(0.16), Baiap2(0.16), Mcf2l(0.14), Cdc42ep5(0.14), Cdc42ep1(0.12), Tax1bp3…
heterophilic cell-cell adhesion via plasma membrane cell adhesion molecules	0.000311099	0.293084	1.44054e-11	3.08886e-10	43	0.078752	0.0334722	0.000127181	0.000151808	6.50572e-06	Sele(0.85), Selp(0.72), Amica1(0.62), Amigo2(0.53), Amigo2(0.53), Tenm2(0.52), Tenm2(0.52), Tenm3(0.51), Fat4(0.49), Itga5(0.48), Vcam1(0.47), Vcam1(0.47), Cd24a(0.34), Cadm3(0.33), Cd200(0.32), Mcam(0.31), Nectin4(0.29), Nectin2(0.28), Itga4(0.27), Ptprd(0.25), Dchs1(0.25), Itgal(0.24), Pvr(0.23), Cxadr(0.21), Cadm4(0.2), Cdh2(0.15), Alcam(0.14), Scarf2(0.13), L1cam(0.12), Tenm4(0.12), Umod(0.11…
chemokine-mediated signaling pathway	0.000359955	0.348783	1.49861e-11	3.19403e-10	29	0.00171054	0.00284228	0.0200799	0.00231025	9.11847e-06	Cxcl5(1.3), Cxcl3(1.29), Ppbp(1.22), Ccl11(0.83), Ccl6(0.82), Pf4(0.71), Cxcl2(0.62), Cxcl13(0.61), Cxcl13(0.61), Ccr1(0.6), Ccl7(0.56), Ccl20(0.55), Cxcl10(0.39), Cxcl10(0.39), Ccl2(0.27), Ccl2(0.27), Ccl4(0.18), Cxcl12(0.13), Cxcl12(0.13), Cxcl1(0.12), Ptk2b(0.12), Ccl9(0.03), Ccl25(-0.14), Cx3cl1(-0.14), Ccl5(-0.34), Ccl5(-0.34), Ackr3(-0.35), Ccl21a(-0.49), Ccl22(-0.94),
peptidyl-tyrosine autophosphorylation	0.000770461	0.278314	1.52455e-11	3.22985e-10	44	0.014042	0.019943	0.000320773	0.000272893	9.37947e-05	Itk(0.68), Bmx(0.67), Syk(0.63), Aatk(0.62), Aatk(0.62), Kdr(0.51), Fes(0.41), Btk(0.37), Fyn(0.37), Fgr(0.36), Igf1r(0.33), Igf1r(0.33), Insr(0.32), Jak2(0.31), Abl2(0.3), Jak3(0.29), Styk1(0.27), Src(0.26), Erbb4(0.25), Tnk1(0.24), Matk(0.21), Frk(0.2), Abl1(0.19), Abl1(0.19), Srms(0.16), Srms(0.16), Tec(0.16), Tec(0.16), Ptk2b(0.12), Ptk2b(0.12), Tnk2(0.12), Jak1(0.11), Lyn(0.11), Fer(0.07), L…
Z disc	0.000127764	0.214605	1.53883e-11	3.2407e-10	89	0.0149064	0.00303808	6.37051e-05	0.00202081	0.000616252	Slc4a1(0.91), Ryr1(0.74), Ank1(0.73), Pde4b(0.68), Ttn(0.57), Ttn(0.57), Neb(0.55), Neb(0.55), Fbxo32(0.52), Cacna1c(0.5), Cacna1c(0.5), Synpo2(0.49), Synpo2(0.49), Synpo2(0.49), Synm(0.41), Kcna5(0.4), Grk3(0.4), Sync(0.39), Synpo(0.38), Syne2(0.36), Syne2(0.36), Bag3(0.35), Jph2(0.35), Jph1(0.32), Ppp1r12a(0.29), Nos1ap(0.27), Hdac4(0.27), Krt19(0.26), Vcl(0.26), Fhl2(0.24), Actn1(0.24), Sptan1…
protein heterodimerization activity	0.00066707	0.090823	1.57793e-11	3.30338e-10	426	0.0395024	0.00252935	0.00027833	0.000171848	0.000569129	Inhba(1.17), Atf3(0.99), H2-Q10(0.95), Bdkrb2(0.92), Nr4a2(0.91), Nr4a2(0.91), Chrnb4(0.9), Tlr6(0.88), Add2(0.83), Fos(0.83), Inhbb(0.79), Bhlhe41(0.74), Bhlhe41(0.74), Drd1(0.69), Jun(0.69), Pgf(0.69), Sycp2(0.68), Notch1(0.64), Ikzf3(0.61), Ikzf3(0.61), Cxcl13(0.61), Nr4a1(0.58), Nr4a1(0.58), Twist1(0.57), Sox4(0.54), Itgav(0.53), Sycp3(0.52), Tenm2(0.52), Abcg1(0.51), Tenm3(0.51), Alox5ap(0.5…
Wnt signaling pathway	0.000407437	0.138491	1.84591e-11	3.84166e-10	184	0.0320063	0.00292011	0.000770585	0.000222531	0.000227137	Wnt9b(1), Frat2(0.75), Cxxc4(0.74), Nkd2(0.68), Wnt11(0.6), Cd44(0.49), Amotl1(0.47), Tnik(0.47), Macf1(0.44), Macf1(0.44), Fzd5(0.43), Sfrp2(0.4), Dact1(0.4), Lrp6(0.38), Lrp6(0.38), Wisp1(0.38), Apc(0.35), Apc(0.35), Frzb(0.34), Ptk7(0.34), Fermt2(0.34), Csnk1e(0.32), Hhex(0.31), Tcf7(0.31), Fzd4(0.29), Ccdc88c(0.29), Ror1(0.28), Strn(0.28), Ddit3(0.27), Cdk14(0.27), Wnt2b(0.27), Ddx3x(0.26), T…
chromatin modification	0.00104216	0.122402	1.98602e-11	4.10909e-10	249	0.00446414	0.00690217	0.004215	0.00016879	0.000256925	Chd5(1.05), Eya4(0.69), Jmjd1c(0.68), Chd7(0.59), Kmt2a(0.53), Tet3(0.48), Kmt2d(0.45), Epc1(0.44), Kdm6b(0.43), Chd2(0.39), Kmt2e(0.38), Setd2(0.37), Kdm7a(0.37), Setd7(0.35), Brd4(0.33), Smarca1(0.33), Chd6(0.32), Ash1l(0.32), Tet2(0.32), Jak2(0.31), Arid1a(0.31), Kmt2c(0.31), Kat6a(0.31), Ubn1(0.3), Dnmt3a(0.29), Atrx(0.29), Kdm5b(0.29), Phf13(0.29), Brd2(0.28), Bcor(0.28), Kmt2b(0.28), Kansl3…
receptor activity	0.000659785	0.181283	2.42757e-11	4.99346e-10	105	0.071658	0.00426129	0.000252231	6.56356e-05	0.000472822	Clec4e(1.14), Treml2(0.82), Itgb3(0.67), Gfra1(0.65), Gfra1(0.65), Notch1(0.64), Fpr2(0.63), Pla2r1(0.56), Tlr4(0.55), Med13(0.53), Mrc1(0.51), Tlr5(0.44), Tlr7(0.44), Robo4(0.42), Ramp3(0.4), Itgb4(0.4), Rtn4rl2(0.38), Stra6(0.37), Klrb1b(0.36), Ephb2(0.35), Gfra2(0.34), Notch4(0.33), Cadm3(0.33), Calcr(0.32), Cd200(0.32), Notch3(0.32), P2rx7(0.32), Nectin4(0.29), Notch2(0.28), Nectin2(0.28), An…
Rho GTPase binding	0.00124774	0.294996	2.82766e-11	5.78281e-10	37	0.00129563	0.0142019	0.00109811	0.00464165	7.71349e-05	Pak3(0.97), Cit(0.6), Srgap1(0.53), Dock11(0.5), Akap13(0.48), Flna(0.42), Inf2(0.41), Fmnl2(0.38), Rock2(0.34), Dock9(0.33), Fmnl1(0.3), Cdc42bpb(0.28), Myo9b(0.26), Vcl(0.26), Rock1(0.25), Fmnl3(0.24), Lrrk2(0.23), Lrrk2(0.23), Iqgap1(0.22), Diaph2(0.21), Daam2(0.2), Dock10(0.2), Iqgap2(0.19), Diaph1(0.18), Arhgef2(0.12), Kif3b(0.11), Daam1(0.05), Diaph3(0.02), Arhgef16(0), Arhgdia(-0.05), Vps4…
post-embryonic development	0.000679616	0.19313	2.88469e-11	5.84171e-10	88	0.000973732	0.00103307	0.00153586	0.00660982	0.00122933	Nr4a2(0.91), Csrnp1(0.78), Apob(0.76), Meg3(0.59), Prdm1(0.57), Arid5b(0.54), Kmt2a(0.53), Bcl2l11(0.46), Heg1(0.43), Tgfbr1(0.39), Tiparp(0.39), Schip1(0.36), Rc3h2(0.35), Ago2(0.33), Fgfr2(0.32), Tet2(0.32), Mapk8ip3(0.3), Kdm5b(0.29), Plagl2(0.28), Ppp1r13l(0.27), Flt3(0.26), Bcl2(0.24), Bcl2(0.24), Mecp2(0.24), Slc18a2(0.24), Szt2(0.24), Tcf7l2(0.23), Acvr2b(0.22), Acvr2b(0.22), Rab3a(0.22), …
neuron differentiation	0.000593529	0.208104	2.88949e-11	5.84171e-10	78	0.0704671	0.00430324	5.52152e-06	0.00147196	0.000746728	Gdnf(1.1), Wnt9b(1), Ntrk2(0.94), Nr4a2(0.91), Gfra1(0.65), Notch1(0.64), Gas7(0.62), Wnt11(0.6), Cdk5r1(0.59), Corin(0.53), Ret(0.51), Runx1(0.44), Hipk2(0.42), Epha2(0.41), Epha2(0.41), Lmx1b(0.4), Ddit4(0.4), Brsk1(0.37), Tal1(0.35), Bhlhe22(0.34), Smarca1(0.33), Hoxc8(0.32), Ier2(0.32), Hipk1(0.31), Casp3(0.3), Nrbp2(0.3), Adnp2(0.3), Runx2(0.29), Wnt2b(0.27), Mef2c(0.26), Btg2(0.25), Ptprd(0…
neural tube closure	0.00096029	0.187984	2.91463e-11	5.85906e-10	94	0.032217	0.00155464	9.91717e-05	0.000824938	0.001499	Nog(0.96), Sema4c(0.62), Twist1(0.57), Tfap2a(0.49), Dlc1(0.46), Hectd1(0.43), St14(0.41), Sfrp2(0.4), Stil(0.39), Lrp6(0.38), Lrp6(0.38), Shroom3(0.37), Setd2(0.37), Rock2(0.34), Ptk7(0.34), Ptk7(0.34), Apaf1(0.32), Zeb2(0.32), Arid1a(0.31), Grhl2(0.29), Cecr2(0.29), Cecr2(0.29), Tgif1(0.28), Cited2(0.27), Rarg(0.27), Celsr1(0.26), Celsr1(0.26), Kdm2a(0.25), Ski(0.24), Med12(0.23), Tsc1(0.23), K…
protein tyrosine phosphatase activity	0.0010097	0.191949	3.07038e-11	6.1373e-10	88	0.0143587	0.00837137	0.00327474	3.58343e-05	0.000396487	Dusp10(0.72), Eya4(0.69), Dusp1(0.57), Ptpn22(0.52), Ptprj(0.43), Ptprj(0.43), Ptpn14(0.42), Ptpn12(0.39), Ptprb(0.39), Ptprm(0.38), Dusp14(0.36), Dusp7(0.36), Dusp6(0.35), Dusp5(0.35), Dusp8(0.32), Ptpn13(0.31), Ptprc(0.31), Ptprc(0.31), Ptpru(0.26), Ssh2(0.26), Ptprd(0.25), Ptprg(0.25), Ptpn21(0.25), Pald1(0.25), Ssh1(0.24), Ptpn18(0.23), Ptpdc1(0.22), Dusp4(0.22), Ptpro(0.2), Ptpro(0.2), Ptpn1…
SMAD binding	0.00126829	0.246255	3.13848e-11	6.23818e-10	53	0.00758923	0.000692689	0.0129744	0.000112475	0.00105184	Hipk2(0.42), Flna(0.42), Crebbp(0.4), Smad3(0.4), Tgfbr1(0.39), Tgfbr1(0.39), Col5a2(0.37), Bmp2(0.34), Skil(0.33), Tgfbr3(0.33), Tgfbr3(0.33), Ep300(0.33), Pml(0.32), Acvr1b(0.29), Runx3(0.27), Col3a1(0.27), Cited2(0.27), Mef2a(0.26), Ski(0.24), Ski(0.24), Zc3h3(0.24), Purb(0.21), Rnf111(0.2), Bmpr1b(0.18), Pura(0.15), Acvr1(0.14), Tgfbr2(0.14), Tgfbr2(0.14), Prdm16(0.12), Acvrl1(0.11), Tcf12(0.…
integrin-mediated signaling pathway	0.000176438	0.254395	3.19272e-11	6.31052e-10	64	0.0392588	0.018224	0.000834375	9.01732e-05	5.40858e-05	Itgb3(0.67), Plek(0.65), Syk(0.63), Sema7a(0.54), Sema7a(0.54), Itgav(0.53), Itga5(0.48), Itga2(0.44), Itgam(0.44), Lama5(0.42), Itgb4(0.4), Itga8(0.39), Fgr(0.36), Fgr(0.36), Itga9(0.36), Ctgf(0.35), Tyrobp(0.34), Fermt2(0.34), Itga2b(0.31), Itga3(0.3), Pxn(0.29), Pxn(0.29), Col3a1(0.27), Gab2(0.27), Itga4(0.27), Src(0.26), Itgb2l(0.25), Itga6(0.24), Itgal(0.24), Itgb2(0.18), Fcer1g(0.17), Ptpn1…
protein ubiquitination	0.000870414	0.132061	3.38171e-11	6.64693e-10	231	0.000247832	0.00175556	0.0312688	0.000769536	0.000787892	Tnfaip3(0.54), Fbxo32(0.52), Fbxo32(0.52), Herc2(0.48), Hectd1(0.43), Fbxo2(0.43), Rnf122(0.42), Sirt1(0.4), Rc3h2(0.35), Rnf144b(0.34), Rnf38(0.33), Cand2(0.31), Gan(0.31), Fbxo30(0.3), Rlim(0.29), Neurl3(0.29), Enc1(0.28), Smurf1(0.27), Smurf1(0.27), Ube2ql1(0.27), Cul7(0.25), Trim59(0.25), Rnf19b(0.25), Trim33(0.25), Fbxo45(0.24), Fbxo45(0.24), Med12(0.23), Fbxo11(0.23), Klhl21(0.23), Birc6(0.…
axonogenesis	0.000959849	0.197239	3.45693e-11	6.75724e-10	83	0.0145434	0.0131124	3.17957e-05	0.0038373	0.000220309	Pak3(0.97), Notch1(0.64), Notch1(0.64), Klf7(0.64), Cckar(0.56), Map1b(0.51), Adcy1(0.48), Map2(0.47), Map2(0.47), Dst(0.46), Kalrn(0.39), Brsk1(0.37), Apc(0.35), Apc(0.35), Igf1r(0.33), Fgfr2(0.32), Ogn(0.32), Slit2(0.31), Slit2(0.31), Numbl(0.26), Ntng2(0.26), Bcl2(0.24), Ulk1(0.24), Picalm(0.24), Picalm(0.24), Rab3a(0.22), Gsk3b(0.22), Numb(0.21), Numb(0.21), Myh10(0.21), Rnf165(0.21), Uchl1(0…
growth factor binding	0.000629578	0.292523	3.5197e-11	6.84213e-10	41	0.166314	0.00105933	0.000307211	6.45825e-06	0.00297829	Igfbp1(0.71), Nkd2(0.68), Dusp1(0.57), Igfbp3(0.55), Kdr(0.51), Kdr(0.51), Flt1(0.5), Osmr(0.49), Tgfbr1(0.39), Flt4(0.38), Erbb3(0.35), Bmpr2(0.32), Acvr1b(0.29), Vegfa(0.29), Igfbp5(0.28), Cyr61(0.26), Ltbp4(0.26), Erbb2(0.25), Acvr2b(0.22), Acvr2b(0.22), Acvr2b(0.22), Il6st(0.21), Lifr(0.19), Ltbp1(0.19), Fgfbp1(0.18), Fgfbp3(0.18), Acvr1(0.14), Acvr2a(0.1), Acvr2a(0.1), Sdcbp(0.06), Igfbp6(0.…
response to hypoxia	0.000943346	0.168792	3.61068e-11	6.98064e-10	114	0.0137344	0.00822395	0.000151853	0.000560034	0.000980863	Nr4a2(0.91), Ryr1(0.74), Pgf(0.69), Ang(0.64), Fosl2(0.6), Sox4(0.54), Edn1(0.53), Cd38(0.52), Kdr(0.51), Plat(0.51), Flt1(0.5), Ednra(0.48), Epas1(0.48), Epas1(0.48), Nos2(0.45), Ager(0.42), Smad3(0.4), Ddit4(0.4), Ddit4(0.4), Ece1(0.37), Bmp2(0.34), Cd24a(0.34), Hif1a(0.34), Hif1a(0.34), Hif1a(0.34), Hif1a(0.34), Ep300(0.33), Ep300(0.33), Adora1(0.32), Pml(0.32), Pml(0.32), Tgfb3(0.3), Nf1(0.29…
Rab GTPase binding	0.00106646	0.1577	3.77787e-11	7.26418e-10	135	0.00595845	0.00235597	0.00264172	0.00146198	0.000280859	Stxbp5l(0.64), Myrip(0.5), Myrip(0.5), Tbc1d10c(0.49), Tbc1d9(0.48), Sytl5(0.45), Erc1(0.41), Rab11fip1(0.36), Sytl2(0.34), Sgsm1(0.31), Sgsm1(0.31), Sgsm1(0.31), Micall1(0.3), Micall1(0.3), Grtp1(0.27), Optn(0.27), Rusc2(0.27), Ulk1(0.24), Dennd5a(0.23), Rabgef1(0.23), Evi5l(0.23), Tbc1d2b(0.22), Wdr44(0.22), Mical1(0.2), Ccdc64b(0.2), Acap2(0.19), Rab3gap2(0.19), Rgp1(0.19), Rgp1(0.19), Gdi1(0.…
MAPK cascade	0.00133284	0.232529	3.92046e-11	7.49762e-10	59	0.00464592	0.000893489	0.00153495	0.0122782	0.000153734	Il1b(0.69), Shank3(0.61), Map2k6(0.55), Ret(0.51), Nphs1(0.41), Itpkb(0.39), Zfp36(0.37), Dok2(0.35), Map3k5(0.35), Dok4(0.34), Setx(0.34), Zfp36l1(0.32), Zfp36l1(0.32), Zfp36l1(0.32), Slc11a1(0.31), Nf1(0.29), Tgfb1(0.28), Smad1(0.26), Smad1(0.26), Mef2a(0.26), Mef2c(0.26), Mef2c(0.26), Mef2c(0.26), Braf(0.25), Lrrk2(0.23), Map2k3(0.19), Map2k3(0.19), Zfp36l2(0.18), Efna1(0.18), Ndst1(0.18), Cav…
positive regulation of interleukin-6 production	0.000668747	0.243544	3.98361e-11	7.57742e-10	58	0.119198	0.0149385	0.00118815	6.53261e-05	7.71177e-06	Il6(1.24), Il1f6(0.75), Il1b(0.69), Il1b(0.69), Tlr4(0.55), Tlr4(0.55), Tlr4(0.55), Tlr4(0.55), Il6ra(0.54), Zbtb20(0.5), Zbtb20(0.5), Il1f9(0.47), Tlr7(0.44), Il33(0.42), Nod2(0.4), Nod2(0.4), Nod2(0.4), Nod2(0.4), Adora2b(0.32), P2rx7(0.32), Zcchc11(0.31), Tnfsf9(0.22), Il1rl2(0.22), Tbc1d23(0.18), Fcer1g(0.17), Fcer1g(0.17), Akirin2(0.16), Tlr2(0.14), Tlr2(0.14), Tlr2(0.14), Arhgef2(0.12), Nod…
regulation of circadian rhythm	0.00123713	0.238703	4.17664e-11	7.90212e-10	56	0.0434191	0.00426341	0.00152486	0.000307458	7.50719e-05	Nr1d1(0.89), Nr1d1(0.89), Noct(0.59), Rorb(0.49), Adcy1(0.48), Per1(0.45), Cry2(0.44), Nr1d2(0.44), Prkcg(0.36), Prox1(0.36), Rock2(0.34), Rora(0.33), Pml(0.32), Csnk1e(0.32), Kdm5b(0.29), Pparg(0.23), Timeless(0.22), Timeless(0.22), Per2(0.21), Fbxl3(0.2), Fbxl3(0.2), Creb1(0.19), Klf10(0.16), Kdm5c(0.15), Mapk10(0.14), Sfpq(0.13), Ezh2(0.12), Ezh2(0.12), Csnk1d(0.12), Maged1(0.1), Npas2(0.09), …
ureteric bud development	0.00100334	0.25787	5.10296e-11	9.52704e-10	48	0.055024	0.000136731	0.00166655	0.00156571	0.000439409	Gdnf(1.1), Gdnf(1.1), Nog(0.96), Bmper(0.59), Ret(0.51), Smad7(0.41), Sim1(0.41), Vcan(0.4), Smad3(0.4), Tshz3(0.4), Fgfr1(0.36), Smad6(0.36), Rarb(0.34), Fgfr2(0.32), Foxc1(0.32), Slit2(0.31), Tgfb1(0.28), Epcam(0.26), Smad1(0.26), Wt1(0.25), Bcl2(0.24), Tcf21(0.22), Smad9(0.17), Robo2(0.17), Robo2(0.17), Lhx1(0.16), Spry1(0.16), Spry1(0.16), Rara(0.14), Osr1(0.08), Bmp7(0.07), Dlg1(0.06), Foxc2…
neuron projection development	0.00110098	0.164892	5.11007e-11	9.52704e-10	118	0.000588766	0.0104446	0.00176636	0.000852687	0.00222371	Il6(1.24), Gdnf(1.1), Tnc(0.86), Chl1(0.81), Gfra1(0.65), Cdk5r1(0.59), Nptxr(0.59), Ngf(0.54), Sema7a(0.54), Prickle2(0.54), Ncam1(0.52), Cd44(0.49), Unc5a(0.48), Flrt3(0.45), Flrt3(0.45), Cntnap1(0.44), Ager(0.42), Hdgfrp3(0.39), Fry(0.39), Lamb1(0.38), Lamb1(0.38), Ptprm(0.38), Areg(0.37), Fgfr1(0.36), Lamb2(0.36), Rapgef2(0.36), Rapgef2(0.36), Lamc1(0.36), Apc(0.35), Cd24a(0.34), Cd24a(0.34),…
positive regulation of phosphatidylinositol 3-kinase signaling	0.000966944	0.239694	5.11627e-11	9.52704e-10	57	0.0820227	0.00905349	0.000327912	5.70178e-05	0.000299866	Ntrk2(0.94), Csf3(0.76), Selp(0.72), Kdr(0.51), Flt1(0.5), Cbl(0.48), Hgf(0.46), Pdgfb(0.45), Pdgfb(0.45), Reln(0.45), Hcls1(0.4), Sirt1(0.4), Plxnb1(0.39), Fyn(0.37), Fgr(0.36), Igf1r(0.33), Jak2(0.31), Pdgfa(0.28), Pdgfa(0.28), Dcn(0.27), Angpt1(0.25), Erbb2(0.25), Erbb4(0.25), Agap2(0.24), F2rl1(0.23), Tgfb2(0.23), Pdgfrb(0.19), F2r(0.17), F2r(0.17), Ppard(0.16), Pld2(0.15), Rara(0.14), Igf1(0…
regulation of G-protein coupled receptor protein signaling pathway	0.000685803	0.340707	5.29816e-11	9.81407e-10	29	0.0379116	0.00251303	0.000905179	2.09707e-05	0.00409755	Rgs18(1.29), Itgb3(0.67), Rgs1(0.66), Rgs9(0.58), Rgs7(0.54), Rgs7(0.54), Rgs7(0.54), Rgs2(0.51), Ramp3(0.4), Plce1(0.39), Kctd12b(0.38), Gpsm1(0.34), Kctd12(0.28), Plcb1(0.27), Grk5(0.23), Usp33(0.19), Arrb2(0.19), Arrb2(0.19), Arrb1(0.17), Arrb1(0.17), Homer2(0.15), Itgb1(0.11), Git1(0.08), Tulp3(0.03), Rgs14(0.02), Dynlt1b(-0.03), Ramp2(-0.04), Ric8a(-0.09), Usp20(-0.37),
innate immune response	0.000221759	0.12166	6.98293e-11	1.28675e-09	271	0.0809114	0.072355	0.000111828	6.16253e-07	0.00159533	Clec4d(1.16), Clec4e(1.14), Acod1(1.12), Trim15(1.08), Mefv(0.9), Tlr6(0.88), Ptx3(0.76), S100a9(0.76), Iigp1(0.76), Nlrp6(0.76), Il1f6(0.75), S100a8(0.74), Aim2(0.72), Slpi(0.71), Tlr8(0.71), Havcr2(0.71), Cd84(0.69), Itk(0.68), Bmx(0.67), Rel(0.66), Ang(0.64), Ang(0.64), Syk(0.63), Tlr4(0.55), Nlrp3(0.48), Mst1r(0.47), Il1f9(0.47), Lcn2(0.45), Tlr5(0.44), Tlr7(0.44), Casp4(0.43), Defb1(0.42), T…
cAMP catabolic process	0.00038294	0.491789	7.35611e-11	1.34849e-09	15	0.031887	0.0150559	1.29745e-05	0.000448621	0.00271967	Pde4b(0.68), Pde4b(0.68), Pde1c(0.62), Pde10a(0.52), Pde3a(0.43), Pde4d(0.33), Pde4d(0.33), Pde3b(0.29), Pde2a(0.2), Pde2a(0.2), Pde4c(0.17), Pde1a(0.14), Pde4a(0.1), Pde4a(0.1), Pde1b(0.09),
adherens junction	0.00104559	0.28057	7.93108e-11	1.4464e-09	40	0.00222802	0.00190832	0.00072407	0.00986879	0.00114142	Notch1(0.64), Rnd1(0.62), Cdh5(0.59), Jag1(0.55), Efna5(0.46), Dll1(0.45), Ceacam1(0.41), Synm(0.41), Tjp1(0.4), Cdh1(0.38), Shroom3(0.37), Wnk3(0.37), Esam(0.33), Fam129b(0.33), Myo1e(0.3), Nectin4(0.29), Vcl(0.26), Ctnna1(0.25), Ahi1(0.23), Mtss1(0.23), Cxadr(0.21), Magi1(0.17), Cdh2(0.15), Itgb1(0.11), Afdn(0.1), Ceacam2(0.09), Epb41l5(0.04), Ctnnb1(0.03), Ctnnb1(0.03), Limd1(0.01), Limd1(0.01…
sensory perception of sound	0.00118741	0.179704	8.58354e-11	1.55736e-09	99	0.00320017	0.000210587	0.00018991	0.00792788	0.0198034	Col11a2(0.83), Col11a2(0.83), Tub(0.7), Eya4(0.69), Chd7(0.59), Tfap2a(0.49), Fam65b(0.49), Fam107b(0.48), Spry2(0.44), Adgrv1(0.41), Adgrv1(0.41), Tjp1(0.4), Cdh1(0.38), Fgfr1(0.36), Slc17a8(0.36), Cemip(0.35), Gabrb3(0.34), Atp8b1(0.32), Nav2(0.32), Usp53(0.31), Casp3(0.3), Fzd4(0.29), Nipbl(0.29), Coch(0.28), Snai2(0.27), Snai2(0.27), Cdkn2d(0.26), Map1a(0.26), Fbxo11(0.23), Lrig2(0.23), Atp2b…
insulin receptor binding	0.00153516	0.297647	9.16543e-11	1.65445e-09	35	0.0184805	0.00132896	0.00186589	0.00138017	0.000537527	Dok7(0.64), Irs2(0.49), Irs2(0.49), Irs1(0.4), Irs1(0.4), Dok2(0.35), Dok4(0.34), Igf1r(0.33), Phip(0.31), Src(0.26), Enpp1(0.2), Plcg1(0.2), Pik3r1(0.19), Ptpn1(0.19), Frs3(0.19), Igf2(0.16), Ptpn11(0.16), Shc1(0.16), Igf1(0.12), Igf1(0.12), Pdpk1(0.1), Frs2(0.1), Dok1(0.09), Dok3(0.09), Snx4(0.08), Ptprf(0.07), Sorbs1(0.02), Sorbs1(0.02), Sorbs1(0.02), Grb10(-0.03), Grb10(-0.03), Snx1(-0.04), L…
microtubule cytoskeleton organization	0.00140441	0.198573	9.89132e-11	1.77642e-09	79	0.00112373	0.0047835	0.0052233	0.00146839	0.001157	Crmp1(0.55), Map1b(0.51), Tuba8(0.5), Eml1(0.48), Gas2l3(0.47), Mtap7d3(0.42), Mtap7d3(0.42), Phldb2(0.34), Birc5(0.33), Tacc1(0.33), Son(0.3), Nefm(0.29), Ndel1(0.29), Map1a(0.26), Cul7(0.25), Clasp2(0.25), Atxn7(0.25), Cdk5rap2(0.24), Cdc42bpa(0.22), Specc1(0.22), Camsap2(0.21), Dock7(0.19), Wee1(0.18), Cep120(0.18), Map7(0.17), Pafah1b1(0.17), Pafah1b1(0.17), Tacc2(0.17), Ranbp10(0.17), Mark1(…
vasculogenesis	0.000332528	0.2429	1.08357e-10	1.93619e-09	60	0.12218	0.00245609	0.000268025	1.77679e-05	0.00435658	Has2(1.55), Ntrk2(0.94), Foxf1(0.56), Kdr(0.51), Junb(0.5), Hey1(0.43), Ptprj(0.43), Rasip1(0.43), Heg1(0.43), Epha2(0.41), Tiparp(0.39), Gjc1(0.37), Myocd(0.37), Setd2(0.37), Egfl7(0.37), Qk(0.36), Hey2(0.35), Tgfbr3(0.33), Zfp36l1(0.32), Hhex(0.31), Myo1e(0.3), Zmiz1(0.3), Fzd4(0.29), Cited2(0.27), Angpt1(0.25), Foxm1(0.25), Wt1(0.25), Cul7(0.25), Sox17(0.22), Eng(0.2), Eng(0.2), Hdac7(0.2), Fb…
heart morphogenesis	0.000779573	0.261271	1.34056e-10	2.37615e-09	48	0.106928	0.00499054	6.31563e-05	0.00986622	1.7445e-05	Xirp1(0.65), Chd7(0.59), Chd7(0.59), Ttn(0.57), Fat4(0.49), Dlc1(0.46), Flna(0.42), Tbx3(0.35), Insr(0.32), Foxc1(0.32), Kat6a(0.31), Kat6a(0.31), Zmiz1(0.3), Vegfa(0.29), Nipbl(0.29), Flrt2(0.26), Dchs1(0.25), Mkl2(0.25), Asxl1(0.24), Ncor2(0.23), Ncor2(0.23), Tgfb2(0.23), Kdm6a(0.22), Col4a3bp(0.18), Epor(0.16), Pbrm1(0.16), Ptch1(0.15), Baz1b(0.15), Aldh1a2(0.14), Dvl3(0.1), Mtor(0.09), Rxra(0…
negative regulation of BMP signaling pathway	0.00148524	0.270485	1.34923e-10	2.37615e-09	42	0.045573	0.00291085	0.00102211	0.000827177	0.000286321	Nog(0.96), Nog(0.96), Nog(0.96), Nog(0.96), Notch1(0.64), Bmper(0.59), Hipk2(0.42), Smad7(0.41), Smad7(0.41), Nbl1(0.4), Sfrp2(0.4), Sfrp2(0.4), Smad6(0.36), Skil(0.33), Ctdspl2(0.31), Lemd3(0.28), Grem2(0.27), Trim33(0.25), Ski(0.24), Ski(0.24), Tcf7l2(0.23), Abl1(0.19), Twsg1(0.14), Twsg1(0.14), Fzd1(0.09), Sfrp1(0.02), Tob1(0.01), Spg20(0.01), Fstl3(0), Fstl3(0), Ppm1a(-0.05), Htra3(-0.05), Ch…
peptidase inhibitor activity	0.000788181	0.247066	1.34993e-10	2.37615e-09	57	0.0047264	0.00503276	0.000148175	1.27654e-05	0.130577	Pi15(0.94), Papln(0.74), Slpi(0.71), Serpinb1a(0.66), Wfdc21(0.65), Ngp(0.58), Ngf(0.54), Serpina3m(0.54), Serpine1(0.52), Timp1(0.45), Serpine2(0.41), Ambp(0.37), Col7a1(0.34), Birc5(0.33), Itih2(0.33), Itih5(0.33), Serpina3n(0.32), Wfdc15b(0.32), Cd109(0.29), Kng1(0.27), Tfpi(0.26), Tfpi2(0.26), Cast(0.25), Serpina1b(0.23), Birc6(0.22), Timp2(0.21), Timp3(0.21), Wfdc2(0.18), Gpc3(0.17), Wfdc1(0…
dendritic spine	0.000528386	0.190448	1.41137e-10	2.472e-09	98	0.127341	0.0248376	1.25497e-05	0.000163291	0.000695182	Ntrk2(0.94), Nr1d1(0.89), Drd1(0.69), Pde4b(0.68), Pgr(0.66), Rapgef4(0.63), Cdk5r1(0.59), Tenm2(0.52), Adrb2(0.47), Fbxo2(0.43), Dbn1(0.4), Grk3(0.4), Lama2(0.38), Synpo(0.38), Atp1a2(0.35), Adora1(0.32), Syne1(0.32), Tiam1(0.31), Abl2(0.3), Epha4(0.29), Kcnj2(0.28), Palmd(0.28), Strn(0.28), Ppp1r9b(0.27), Fus(0.26), Neurl1a(0.25), Ophn1(0.25), Hspa8(0.24), Actn1(0.24), Ncoa2(0.22), Gsk3b(0.22),…
positive regulation of mitotic nuclear division	0.00150448	0.349767	1.42281e-10	2.47976e-09	25	0.0255276	0.00628203	0.00102324	6.53914e-05	0.00300251	Ereg(0.79), Ereg(0.79), Ereg(0.79), Il1b(0.69), Egf(0.56), Edn1(0.53), Pdgfb(0.45), Igf1r(0.33), Insr(0.32), Insr(0.32), Phip(0.31), Tgfa(0.3), Rgcc(0.27), Pdgfrb(0.19), Btc(0.16), Btc(0.16), Igf2(0.16), Igf1(0.12), Met(0.1), Edn3(0.07), Lrp5(0.05), Sh2b1(-0.03), Nusap1(-0.07), Tnf(-0.19), Pebp1(-0.32),
regulation of GTPase activity	0.000630128	0.214181	1.45628e-10	2.52565e-09	70	0.0209577	0.00322429	0.00164626	0.00111884	0.000418009	Ntrk2(0.94), Prkg1(0.72), Ephb3(0.69), Efna5(0.46), Efna5(0.46), Epha3(0.46), Rasip1(0.43), Tiam1(0.31), Rictor(0.31), Epha1(0.3), Dab2ip(0.3), Epha4(0.29), Epha4(0.29), Epha4(0.29), Nf1(0.29), Bcl6(0.25), Rasa3(0.25), Tsc1(0.23), Rasa2(0.23), Iqgap1(0.22), Rab3gap2(0.19), Iqgap2(0.19), Rasgrp1(0.18), Ocrl(0.18), Pafah1b1(0.17), Syngap1(0.16), Chn1(0.15), Fgd1(0.14), Als2(0.12), Rasgrp3(0.12), Ng…
embryonic hemopoiesis	0.000735892	0.422036	1.67648e-10	2.89336e-09	19	0.117228	0.0142274	8.22409e-05	0.000311313	0.0002542	Kmt2a(0.53), Kdr(0.51), Runx1(0.44), Kitl(0.37), Tal1(0.35), Hif1a(0.34), Sh2b3(0.33), Sh2b3(0.33), Kat6a(0.31), Ahr(0.28), Gata3(0.18), Gata3(0.18), Tnrc6c(0.18), Kit(0.17), Tgfbr2(0.14), Zfpm1(0.12), Pbx1(0.05), Med1(0.05), Lmo2(-0.03),
core promoter binding	0.00103649	0.218431	1.7753e-10	3.04904e-09	65	0.0242318	0.00105553	0.0158872	7.90037e-05	0.00113218	E2f7(0.85), E2f7(0.85), Notch1(0.64), Gadd45a(0.55), Runx1(0.44), Runx1(0.44), Zfp281(0.42), Rest(0.39), Ago2(0.33), Ep300(0.33), Ccar1(0.32), Tcf7(0.31), Klf4(0.3), Ifi207(0.3), Hdac4(0.27), Kansl1(0.26), Rbmxl1(0.25), Spi1(0.24), Kdm3a(0.24), Polr2a(0.23), Kansl1l(0.23), Hdac5(0.22), Safb(0.22), Per2(0.21), Relb(0.18), Elk1(0.15), Rb1(0.15), Hnrnpu(0.14), Hnrnpu(0.14), Sfpq(0.13), Ezh2(0.12), E…
3',5'-cyclic-AMP phosphodiesterase activity	0.000921387	0.328925	2.26961e-10	3.87916e-09	30	0.0118316	0.0164029	2.85636e-05	0.000641182	0.0107539	Pde4b(0.68), Pde4b(0.68), Pde4b(0.68), Pde1c(0.62), Pde10a(0.52), Pde6a(0.47), Pde3a(0.43), Pde3a(0.43), Pde4d(0.33), Pde3b(0.29), Pde8b(0.28), Pde7b(0.23), Pde7b(0.23), Pde9a(0.22), Tdp2(0.22), Pde2a(0.2), Pde7a(0.19), Pde4c(0.17), Pde1a(0.14), Pde8a(0.12), Pde4a(0.1), Pde4a(0.1), Pde4a(0.1), Pde1b(0.09), Pde12(-0.01), Usb1(-0.03), Smpdl3a(-0.08), Pde5a(-0.16), Enpp6(-0.21), Smpdl3b(-1.36),
regulation of cell adhesion	0.00202777	0.284427	2.29964e-10	3.91161e-09	37	0.00296888	0.000946738	0.00101547	0.0320347	0.000842989	S1pr1(0.59), Ret(0.51), Lama4(0.48), Dll1(0.45), Ptprj(0.43), Cytip(0.43), Lama5(0.42), Fes(0.41), Lama2(0.38), Lama3(0.34), Lama1(0.32), Pml(0.32), Jak2(0.31), Abl2(0.3), Ppp1r12a(0.29), Prkx(0.29), Gsn(0.28), Pkd1(0.25), Nuak1(0.24), Srf(0.16), Jag2(0.13), Ptk2b(0.12), Ptk2b(0.12), Stat5a(0.1), Stat5b(0.07), Il18(0.04), Il18(0.04), Sox9(0.04), Ppp1cb(0.02), Cyth2(0.01), Serpini1(0.01), Ptk2(-0.…
lymphangiogenesis	0.00071178	0.420316	2.3393e-10	3.96001e-09	19	0.157824	0.000776375	0.00500415	0.0007082	3.23849e-05	Ptpn14(0.42), Ptpn14(0.42), Flt4(0.38), Flt4(0.38), Prox1(0.36), Prox1(0.36), Bmpr2(0.32), Pdpn(0.32), Ccbe1(0.31), Ccbe1(0.31), Vegfa(0.29), Acvr2b(0.22), Acvrl1(0.11), Sox18(0.11), Sox18(0.11), Nfatc1(0.1), Foxc2(0.02), Foxc2(0.02), Ppp3cb(-0.03),
cell adhesion molecule binding	0.00103714	0.227828	2.35138e-10	3.96151e-09	62	0.0154405	0.0647104	0.000960272	0.000607966	4.51141e-05	Sell(0.76), Adam8(0.71), Adam8(0.71), Itgb3(0.67), Amica1(0.62), Tenm2(0.52), Tenm2(0.52), Tenm3(0.51), Dsp(0.5), Itga5(0.48), Vcam1(0.47), Cldn7(0.43), Cdh1(0.38), Fgfr1(0.36), Cadm3(0.33), Cd200(0.32), Nectin4(0.29), Nectin2(0.28), Nectin2(0.28), Itga4(0.27), Src(0.26), Ptprd(0.25), Itgal(0.24), Pvr(0.23), Tgfbi(0.22), Cxadr(0.21), Msn(0.21), Cadm4(0.2), Jup(0.19), Itgb2(0.18), Ctnnd1(0.16), Pt…
positive regulation of smooth muscle cell proliferation	0.00194889	0.202666	2.49529e-10	4.18405e-09	73	0.00793093	0.00735736	0.00312971	0.000583706	0.00105251	Il6(1.24), Ptgs2(1.16), Nr4a3(0.99), Ereg(0.79), Ereg(0.79), Jun(0.69), Itgb3(0.67), Hbegf(0.64), S1pr1(0.59), Il6ra(0.54), Edn1(0.53), Egr1(0.48), Pdgfb(0.45), Pdgfb(0.45), Itga2(0.44), Ager(0.42), Alox12(0.42), Ptafr(0.42), Wisp1(0.38), Hif1a(0.34), Igf1r(0.33), Fgfr2(0.32), Notch3(0.32), Calcrl(0.32), Fgf2(0.31), Cdh13(0.3), Vegfa(0.29), Hdac4(0.27), Egfr(0.25), Zfp143(0.25), Orc1(0.24), Gsk3b…
skeletal muscle cell differentiation	0.00126284	0.271201	2.93332e-10	4.89533e-09	41	0.0169927	0.000883632	0.00111094	0.0141788	0.000401213	Atf3(0.99), Fos(0.83), Plagl1(0.65), Notch1(0.64), Hivep3(0.59), Nr4a1(0.58), Sox11(0.57), Ankrd2(0.57), Egr1(0.48), Maff(0.47), Nupr1(0.4), Ankrd1(0.4), Egr2(0.36), Hlf(0.35), Klf5(0.32), Heyl(0.29), Lemd3(0.28), Cited2(0.27), Mef2c(0.26), Mef2c(0.26), Btg2(0.25), Sap30(0.24), Rb1(0.15), Med20(0.15), Foxn2(0.13), Bcl9(0.13), Mef2d(0.1), Bcl9l(0.06), Emd(0.04), Emd(0.04), Zfp689(0.03), Lemd2(0.01…
leukocyte migration	0.00073378	0.401355	2.97306e-10	4.93835e-09	23	0.0364945	0.0200762	0.00111005	0.000307167	0.000219027	Fpr1(0.97), C5ar2(0.8), Selp(0.72), Selp(0.72), Il1b(0.69), Pde4b(0.68), Foxj1(0.67), Fpr2(0.63), Amica1(0.62), Mmp9(0.59), Podxl(0.37), Pde4d(0.33), Rock1(0.25), Itga6(0.24), Itga6(0.24), F2rl1(0.23), B4galt1(0.18), Cd34(0.11), Ccl25(-0.14), Itgb7(-0.16), Tnf(-0.19), Aimp1(-0.3), Aimp1(-0.3),
small GTPase mediated signal transduction	0.00126966	0.123704	3.07731e-10	5.08763e-09	202	0.0381136	0.0278291	0.00273128	6.21553e-06	0.0013577	Rab44(1.53), Rasd1(0.75), Rnd3(0.65), Rhov(0.64), Rapgef4(0.63), Rnd1(0.62), Arl4c(0.52), Rab27b(0.51), Arl5b(0.5), Dock11(0.5), Arhgap31(0.49), Rasd2(0.45), Rrad(0.43), Rapgef5(0.41), Rasgrp4(0.4), Plce1(0.39), Rhoj(0.38), Gem(0.37), Rhou(0.37), Rasgrf2(0.36), Bcar3(0.36), Rapgef2(0.36), Rab30(0.34), Rasl11a(0.33), Dock9(0.33), Rasgef1b(0.33), Tiam1(0.31), Sh2d3c(0.31), Rab3b(0.31), Rasl10b(0.31…
negative regulation of cell growth	0.00188643	0.164508	3.37365e-10	5.55162e-09	110	0.00880718	0.00155465	0.000249888	0.0199948	0.00166391	Nppb(1.3), Inhba(1.17), Osgin1(0.8), Osgin1(0.8), Cyp27b1(0.69), Gja1(0.63), Gja1(0.63), Wnt11(0.6), Gng4(0.56), Slit3(0.56), Ptprj(0.43), Rrad(0.43), Eaf2(0.42), Serpine2(0.41), Smad3(0.4), Sfrp2(0.4), Dcbld2(0.4), Sirt1(0.4), Smarca2(0.37), Apbb2(0.34), Nov(0.34), Frzb(0.34), Bmpr2(0.32), Pml(0.32), Slit2(0.31), Sertad1(0.3), Dab2ip(0.3), Acvr1b(0.29), Sertad3(0.29), Tgfb1(0.28), Tgfb1(0.28), I…
phospholipase C-activating G-protein coupled receptor signaling pathway	0.000934082	0.335079	3.62312e-10	5.93453e-09	30	0.0972682	0.00190047	0.000312704	0.000887573	0.00118988	Cxcr2(1.09), Fpr1(0.97), Fpr1(0.97), C5ar2(0.8), Adra1d(0.66), Htr1b(0.65), C5ar1(0.63), Fpr2(0.63), Ltb4r1(0.58), Ednrb(0.5), Ano1(0.46), Plce1(0.39), Esr1(0.37), P2ry2(0.28), Kiss1r(0.23), Cysltr1(0.22), Adra1b(0.18), Agtr1a(0.17), F2r(0.17), Ptger3(0.17), Gnaq(0.12), Npr3(0.11), Adra1a(0.06), Gnb1(0.04), Tgm2(-0.05), Casr(-0.06), Pth1r(-0.09), Pth1r(-0.09), P2ry1(-0.16), C3ar1(-0.43),
cell surface receptor signaling pathway	0.000245829	0.175876	4.33859e-10	7.07371e-09	129	0.0992171	0.0169765	0.000415711	7.03655e-05	0.000799864	Cxcr2(1.09), Plxna2(0.69), Celsr3(0.66), Syk(0.63), Syk(0.63), Cxcl13(0.61), Clec1b(0.6), Cd53(0.58), Edn1(0.53), Adgrg3(0.53), Ncam1(0.52), Adgrf5(0.5), Osmr(0.49), Cbl(0.48), Fcgr3(0.43), Fzd5(0.43), Adgrv1(0.41), Itpkb(0.39), Cd101(0.38), Fyn(0.37), Adcyap1r1(0.35), Cd24a(0.34), Anxa1(0.33), Calcr(0.32), Lama1(0.32), Calcrl(0.32), Cblb(0.32), Artn(0.31), Epha1(0.3), Adgrg6(0.3), Acvr1b(0.29), …
wound healing	0.000407437	0.260774	4.64011e-10	7.5306e-09	52	0.0250483	0.0152301	0.000618654	0.00221109	0.000243325	Nog(0.96), Nlrp6(0.76), Serpine1(0.52), Adrb2(0.47), Macf1(0.44), Lox(0.44), Nbeal2(0.41), Fn1(0.4), Dcbld2(0.4), Sdc1(0.39), Ccm2l(0.36), Ptk7(0.34), Fgf2(0.31), Slc11a1(0.31), Elk3(0.29), Nf1(0.29), Notch2(0.28), Tgfb1(0.28), Col3a1(0.27), Pdgfra(0.27), Celsr1(0.26), Pecam1(0.26), Egfr(0.25), Erbb2(0.25), Fgf7(0.24), Tgfb2(0.23), Mustn1(0.23), Map3k1(0.2), B4galt1(0.18), Sdc4(0.18), Cav1(0.16),…
nuclear hormone receptor binding	0.00204716	0.332723	4.69717e-10	7.58839e-09	27	0.0102703	0.00311314	0.00939479	0.00104831	0.000674087	Cry2(0.44), Sirt1(0.4), Nrip1(0.39), Hif1a(0.34), Ep300(0.33), Ncoa3(0.24), Ncoa3(0.24), Tcf7l2(0.23), Ncoa2(0.22), Ncoa2(0.22), Per2(0.21), Tacc2(0.17), Actn4(0.16), Ncor1(0.14), Ncoa1(0.13), Ncoa1(0.13), Med1(0.05), Med1(0.05), Ctnnb1(0.03), Ctnnb1(0.03), Bcas3(0.03), Ncoa7(-0.01), Snw1(-0.04), Smarcd3(-0.05), Cry1(-0.08), Cry1(-0.08), Stat1(-0.26),
extracellular matrix binding	0.000340348	0.38658	4.73316e-10	7.61178e-09	24	0.0578078	0.0162169	0.000271862	6.85256e-05	0.00350382	Thbs1(0.72), Olfml2b(0.69), Itgb3(0.67), Itgav(0.53), Adamts15(0.4), Adamts5(0.37), Nid1(0.35), Spock2(0.34), Itga2b(0.31), Vegfa(0.29), Dcn(0.27), Cyr61(0.26), Spp1(0.26), Eln(0.23), Tgfbi(0.22), Fbln2(0.21), Olfml2a(0.2), Ssc5d(0.16), Sparcl1(0.15), Bgn(0.11), Sparc(0.09), Adgrg1(0.07), Cd248(-0.15), Smoc1(-0.32),
transcriptional activator activity, RNA polymerase II transcription regulatory region sequence-specific binding	0.00161339	0.20229	4.82772e-10	7.72872e-09	72	0.00833297	0.00143265	0.00173623	0.00252072	0.00507209	Nr4a2(0.91), Nr4a2(0.91), Csrnp1(0.78), Gata5(0.71), Plagl1(0.65), Ikzf3(0.61), Foxf1(0.56), Tfap2a(0.49), Maff(0.47), Runx1(0.44), Gata6(0.43), Eaf2(0.42), Crebbp(0.4), Rest(0.39), Myocd(0.37), Myocd(0.37), Glis1(0.37), Osr2(0.36), Hif1a(0.34), Maf(0.34), Ep300(0.33), Csrnp3(0.32), Arid3a(0.31), Arid3a(0.31), Mafk(0.3), Creb3l3(0.3), Ovol2(0.29), Grhl2(0.29), Csrnp2(0.24), Pparg(0.23), Sox17(0.2…
keratinocyte differentiation	0.00175835	0.281691	5.066e-10	8.07366e-09	37	0.05919	0.0148041	0.00147547	4.10926e-05	0.00131169	Ptgs2(1.16), Notch1(0.64), Sprr2f(0.56), Sprr2f(0.56), Dsp(0.5), Epha2(0.41), St14(0.41), Evpl(0.38), Anxa1(0.33), Txnip(0.32), Ptgs1(0.31), Casp3(0.3), Ubn1(0.3), Trp63(0.27), Lats2(0.26), Clic4(0.25), Clic4(0.25), Sprr1a(0.19), Sprr1a(0.19), Lats1(0.17), Ctnnd1(0.16), Scel(0.13), Yap1(0.12), Yap1(0.12), Map2k1(0.09), Med1(0.05), Intu(0.04), Tsg101(0.02), Stk4(0), Irf6(-0.03), Smarca4(-0.04), Sa…
fibroblast growth factor receptor signaling pathway	0.00200546	0.277086	5.15764e-10	8.18285e-09	38	0.0708846	0.002012	0.00011312	0.00210789	0.00293316	Fat4(0.49), Fgf1(0.45), Flrt3(0.45), Fgfr1(0.36), Fgfr1(0.36), Ctgf(0.35), Setx(0.34), Fgfr2(0.32), Fgfr2(0.32), Fgfr2(0.32), Fgf2(0.31), Kl(0.27), Flrt2(0.26), Fgf7(0.24), Iqgap1(0.22), Frs3(0.19), Ndst1(0.18), Flrt1(0.18), Fgfr4(0.16), Fgfr4(0.16), Fgf9(0.12), Fgf9(0.12), Fgf9(0.12), Fgfr3(0.12), Fgfr3(0.12), Fgfr3(0.12), Frs2(0.1), Frs2(0.1), Frs2(0.1), Sos1(0.04), Grb2(0.03), Cep57(0.01), Cep…
filamentous actin	0.00153991	0.320841	5.33967e-10	8.43381e-09	29	0.0456489	0.0321771	0.00292056	0.000148323	9.78551e-05	Crmp1(0.55), Flna(0.42), Flna(0.42), Fermt2(0.34), Pkd2(0.3), Tmsb10(0.28), Actg1(0.25), Shroom4(0.25), Specc1(0.22), Map3k1(0.2), Fermt1(0.2), Myo6(0.19), Iqgap2(0.19), Tpm4(0.18), Tmod3(0.17), Tmsb4x(0.16), Specc1l(0.16), Shroom2(0.14), Fscn1(0.12), Tpm3(0.12), Myo1c(0.11), Carmil1(0.09), Dpysl3(0.07), Cd2ap(0.04), Prkcz(0), Tpm1(-0.01), Myo1f(-0.11), Espn(-0.23), Rac3(-0.42),
protease binding	0.00156925	0.18325	5.86458e-10	9.22173e-09	88	0.0139286	0.0169858	0.00100983	0.00189954	0.000478938	Hspa1a(1.41), Adamts4(0.97), Bdkrb2(0.92), Chl1(0.81), Sell(0.76), Ryr1(0.74), Itgb3(0.67), Insl3(0.57), Ttn(0.57), Tnfaip3(0.54), Itgav(0.53), Serpine1(0.52), Il1r1(0.49), Cflar(0.45), Lcn2(0.45), Lrp1(0.45), Timp1(0.45), Timp1(0.45), Fn1(0.4), Hspg2(0.4), F3(0.38), Apc(0.35), Ubc(0.34), Casp8ap2(0.32), Ccbe1(0.31), Casp3(0.3), Itga3(0.3), Adamtsl4(0.29), Nos1ap(0.27), Cast(0.25), Bcl2(0.24), Se…
positive regulation of cAMP biosynthetic process	0.00157534	0.333831	6.06851e-10	9.50016e-09	27	0.0465564	0.0240238	0.00176307	1.33461e-05	0.00241682	Mrap(0.73), Drd1(0.69), Akap12(0.68), Insl3(0.57), Ptger4(0.55), Gpr161(0.49), Ptgir(0.41), Ptgir(0.41), Ece1(0.37), Adcyap1r1(0.35), Adora2b(0.32), Adora2b(0.32), Calcr(0.32), Calcrl(0.32), Adora2a(0.19), Gnas(0.19), Gpr65(0.17), Ptger3(0.17), Abca1(0.14), Adrb1(0.04), Gper1(0.03), Gper1(0.03), Adcy7(0.01), Ramp2(-0.04), Gsk3a(-0.06), Adm(-0.15), Nme2(-0.41),
intercalated disc	0.000517188	0.262241	6.7742e-10	1.05582e-08	53	0.0329451	0.0794049	0.000173219	0.000596711	0.000245416	Slc4a1(0.91), Dsc2(0.67), Xirp1(0.65), Gja1(0.63), Gja1(0.63), Dsp(0.5), Dsp(0.5), Akap6(0.44), Kcna5(0.4), Kcna5(0.4), Tjp1(0.4), Atp1a2(0.35), Gja5(0.34), Kcnj2(0.28), Vcl(0.26), Ctnna1(0.25), Tmem65(0.22), Tmem65(0.22), Cxadr(0.21), Jup(0.19), Adra1b(0.18), Fhod1(0.17), Anxa6(0.16), Cdh2(0.15), Cdh2(0.15), Camk2d(0.15), Dsg2(0.13), Itgb1(0.11), Pgm5(0.11), Pgm5(0.11), Slc9a1(0.09), Des(0.07), …
negative regulation of Notch signaling pathway	0.000801391	0.335126	6.91409e-10	1.0729e-08	29	0.102433	0.00489951	0.000137355	0.00360432	0.000376991	Mmp14(0.45), Dll4(0.44), Hey1(0.43), Dlk2(0.38), Dlk2(0.38), Nrarp(0.37), Nrarp(0.37), Nrarp(0.37), Egfl7(0.37), Hey2(0.35), Hey2(0.35), Nfkbia(0.33), Notch4(0.33), Bcl6(0.25), Neurl1a(0.25), 1810011O10Rik(0.24), Numb(0.21), Gata2(0.2), Pear1(0.16), Hif1an(0.15), Chac1(0.11), Cbfa2t2(0.08), Bmp7(0.07), Gdpd5(0.07), Gdpd5(0.07), Gdpd5(0.07), Rfng(-0.01), Slc35c1(-0.15), Rita1(-0.34),
negative regulation of gene expression	0.00221413	0.125861	6.98389e-10	1.079e-08	184	0.0167545	0.00938723	0.000744117	0.000620614	0.00391652	Nog(0.96), Havcr2(0.71), Il1b(0.69), Musk(0.67), Rel(0.66), Gja1(0.63), Ccr1(0.6), Noct(0.59), Prdm1(0.57), Sox11(0.57), Sox11(0.57), Slit3(0.56), Serpine1(0.52), Ptpn22(0.52), Ptpn22(0.52), Zbtb20(0.5), Zc3h12a(0.46), Zc3h12a(0.46), Nos2(0.45), Nos2(0.45), Pdgfb(0.45), Dll4(0.44), Hey1(0.43), Hey1(0.43), Zfp281(0.42), Sfrp2(0.4), Sirt1(0.4), Id3(0.39), Rest(0.39), Tiparp(0.39), Esr1(0.37), Fyn(0…
receptor signaling protein serine/threonine kinase activity	0.00238495	0.22376	7.55937e-10	1.16283e-08	59	0.0111404	0.00960505	0.0017529	0.00209002	0.000960975	Pak3(0.97), Map2k6(0.55), Map3k8(0.48), Tnik(0.47), Map4k4(0.42), Alpk1(0.42), Grk3(0.4), Tgfbr1(0.39), Taok1(0.35), Pak6(0.34), Bmpr2(0.32), Map3k2(0.32), Slk(0.31), Acvr1b(0.29), Stk26(0.28), Taok2(0.25), Map3k3(0.24), Grk5(0.23), Tgfb2(0.23), Acvr2b(0.22), Map4k2(0.2), Map2k3(0.19), Bmpr1b(0.18), Map4k5(0.18), Acvr1(0.14), Tgfbr2(0.14), Map4k3(0.14), Stk25(0.12), Stk24(0.12), Acvrl1(0.11), Pak…
basal lamina	0.00161635	0.394224	8.80058e-10	1.3479e-08	20	0.119619	0.00068192	0.00125888	0.00261348	0.000547621	Ang(0.64), Lama4(0.48), Entpd1(0.47), Lama5(0.42), Fn1(0.4), Hspg2(0.4), Lama2(0.38), Lama2(0.38), Lamb1(0.38), Lamb2(0.36), Lamc1(0.36), Nid1(0.35), Lama1(0.32), Col4a4(0.22), Dlg1(0.06), Col4a5(-0.04), Agrn(-0.05), Agrn(-0.05), Ache(-0.13), Entpd2(-0.39),
brain development	0.0015969	0.154386	9.18386e-10	1.40054e-08	122	0.0773198	0.00151819	0.000117847	0.00294242	0.00435061	Nnat(0.97), Nog(0.96), Cxcr4(0.86), Foxj1(0.67), Aatk(0.62), Cdk5r1(0.59), S1pr1(0.59), Unc5c(0.55), Pcdh19(0.53), Id4(0.51), Irs2(0.49), Eml1(0.48), Eml1(0.48), Efna5(0.46), Reln(0.45), Reln(0.45), Gli3(0.43), Hspg2(0.4), Ddit4(0.4), Bptf(0.37), Fgfr1(0.36), Sphk1(0.36), Bcr(0.35), Igf1r(0.33), Smarca1(0.33), Smarca1(0.33), Apaf1(0.32), Col4a1(0.32), Foxc1(0.32), Ndrg4(0.31), Nradd(0.3), Nf1(0.2…
positive regulation of leukocyte migration	0.000647636	0.472471	1.03583e-09	1.57285e-08	16	0.11197	0.0346672	0.000332228	0.000797622	7.06881e-05	Tnfsf18(0.92), Sele(0.85), Selp(0.72), Selp(0.72), Itgb3(0.67), Mmp9(0.59), Itga2(0.44), Kitl(0.37), Itga2b(0.31), Aoc3(0.3), Itga4(0.27), Ccl2(0.27), Pecam1(0.26), Tlr2(0.14), Tnfrsf18(0.11), Trp53(-0.49),
postsynaptic membrane	0.000437955	0.164403	1.08818e-09	1.64529e-08	134	0.603415	0.0149963	8.79168e-07	0.000533382	0.000311838	Igsf9b(1.05), Ntrk2(0.94), Clstn3(0.92), Clstn3(0.92), Chrnb4(0.9), Kcnc2(0.86), Arc(0.81), Ank1(0.73), Musk(0.67), Sema4c(0.62), Shank3(0.61), Gabrb1(0.56), Psd3(0.53), Tenm2(0.52), Sh2d5(0.48), Nbea(0.47), Dbn1(0.4), Synpo(0.38), Lin7a(0.38), Erbb3(0.35), Bcr(0.35), Gabrb3(0.34), Adora1(0.32), Syne1(0.32), Pcdhb16(0.31), Epha4(0.29), Gabra3(0.28), Kctd12(0.28), Strn(0.28), Grip1(0.27), Erbb2(0.…
patterning of blood vessels	0.0010903	0.308494	1.17321e-09	1.7663e-08	34	0.305672	0.0420767	9.55169e-05	6.44095e-05	0.000186251	Cxcr4(0.86), Sema3e(0.69), Edn1(0.53), Flt1(0.5), Ednra(0.48), Dll4(0.44), Sfrp2(0.4), Nrarp(0.37), Nrarp(0.37), Notch4(0.33), Col4a1(0.32), Plxnd1(0.32), Vegfa(0.29), Ahr(0.28), Rbm15(0.27), Angpt1(0.25), Eng(0.2), Gna13(0.2), Srf(0.16), Vangl2(0.16), Nfatc4(0.15), Acvr1(0.14), Tgfbr2(0.14), Cxcl12(0.13), Nfatc3(0.06), Ctnnb1(0.03), Sema5a(0.03), Foxc2(0.02), Stk4(0), Ppp3r1(-0.02), Tek(-0.09), …
positive regulation of MAP kinase activity	0.0019901	0.244068	1.17942e-09	1.76812e-08	48	0.0187562	0.00432331	0.00540412	0.000943089	0.0013988	Egf(0.56), Edn1(0.53), Flt1(0.5), Mst1r(0.47), Fgf1(0.45), Pdgfb(0.45), Pdgfb(0.45), Ceacam1(0.41), Kitl(0.37), Fgfr1(0.36), Cd24a(0.34), Fgf2(0.31), Pik3r5(0.3), Vegfa(0.29), Pdgfa(0.28), Pdgfa(0.28), Tgfb1(0.28), Src(0.26), Cd40(0.26), Egfr(0.25), Erbb2(0.25), Iqgap1(0.22), Pik3cg(0.22), Pdgfrb(0.19), Rasgrp1(0.18), Kit(0.17), Nox4(0.16), Kras(0.13), Ezh2(0.12), Prkcd(0.1), Maged1(0.1), Tpd52l1…
negative regulation of peptidase activity	0.00139431	0.239123	1.20697e-09	1.80179e-08	56	0.00844147	0.00611209	0.000328644	3.49586e-05	0.143485	Pi15(0.94), Papln(0.74), Slpi(0.71), Serpinb1a(0.66), Ngp(0.58), Ngf(0.54), Serpina3m(0.54), Serpine1(0.52), Timp1(0.45), Serpine2(0.41), Ambp(0.37), Col7a1(0.34), Birc5(0.33), Itih2(0.33), Itih5(0.33), Serpina3n(0.32), Cd109(0.29), Kng1(0.27), Tfpi(0.26), Tfpi2(0.26), Cast(0.25), Serpina1b(0.23), Birc6(0.22), Ecm1(0.21), Timp2(0.21), Timp3(0.21), Wfdc2(0.18), Gpc3(0.17), Wfdc1(0.17), Reck(0.16),…
cell-matrix adhesion	0.000110618	0.241961	1.33862e-09	1.98994e-08	77	0.471415	0.0989901	0.000411583	1.03419e-06	5.79537e-05	Adam8(0.71), Itgb3(0.67), Itgb3(0.67), Col13a1(0.6), Itgav(0.53), Itgav(0.53), Vcam1(0.47), Bcl2l11(0.46), Itga2(0.44), Fn1(0.4), Fn1(0.4), Itgb4(0.4), Itga8(0.39), Emp2(0.38), Ctgf(0.35), Nid1(0.35), Fermt2(0.34), Fermt2(0.34), Tnxb(0.33), Itga2b(0.31), Tiam1(0.31), Pxn(0.29), Col3a1(0.27), Itga4(0.27), Itga4(0.27), Sned1(0.26), Itga6(0.24), Itgal(0.24), Tsc1(0.23), Adam9(0.18), Itgb2(0.18), Ada…
fascia adherens	0.00196334	0.449812	1.38996e-09	2.05761e-08	14	0.0114466	0.0155567	0.00157163	0.00604003	0.000340151	Xirp1(0.65), Gja1(0.63), Gja1(0.63), Nrap(0.51), Dsp(0.5), Tln2(0.35), Vcl(0.26), Actn1(0.24), Sptan1(0.23), Jup(0.19), Cdh2(0.15), Cdh2(0.15), Des(0.07), Ctnnb1(0.03),
cell fate commitment	0.00140771	0.274417	1.53521e-09	2.26316e-08	43	0.165044	0.00756427	0.000340654	0.000491886	0.000789947	Wnt9b(1), Gata5(0.71), Notch1(0.64), Wnt11(0.6), Prdm1(0.57), Kdr(0.51), Tead4(0.5), Spry2(0.44), Spry2(0.44), Kdm6b(0.43), Hey2(0.35), Tal1(0.35), Bmp2(0.34), Fgfr2(0.32), Pml(0.32), Casp3(0.3), Wnt2b(0.27), Mef2c(0.26), Erbb4(0.25), Pparg(0.23), Pparg(0.23), Tgfb1i1(0.22), Wnt9a(0.21), Sox5(0.2), Hes1(0.12), Wnt7a(0.07), Sox9(0.04), Wnt7b(0.04), Sox6(0.03), Trps1(0.02), Bmp4(0.01), Mitf(0.01), …
lymph vessel development	0.00100406	0.479709	1.54466e-09	2.26764e-08	14	0.268795	0.00280963	0.00408639	0.000483373	4.38836e-05	Syk(0.63), Kdr(0.51), Efnb2(0.48), Heg1(0.43), Flt4(0.38), Flt4(0.38), Prox1(0.36), Foxc1(0.32), Ccbe1(0.31), Tmem204(0.14), Tmem204(0.14), Sox18(0.11), Nr2f2(0.06), Foxc2(0.02),
face morphogenesis	0.00188016	0.294071	1.61314e-09	2.35839e-08	33	0.0774178	0.00907645	0.00157562	0.000779186	0.000425848	Nog(0.96), Csrnp1(0.78), Arid5b(0.54), Tfap2a(0.49), Tiparp(0.39), Lrp6(0.38), Stra6(0.37), Schip1(0.36), Kat6a(0.31), Kat6a(0.31), Tgfb3(0.3), Tgfb3(0.3), Crispld2(0.3), Crispld1(0.3), Nipbl(0.29), Tgfb1(0.28), Pdgfra(0.27), Ankrd11(0.26), Ski(0.24), Tcf7l2(0.23), Tgfb2(0.23), Zfp950(0.17), Ptpn11(0.16), Specc1l(0.16), Sgpl1(0.08), Rab3gap1(0.03), Cdk2ap1(-0.04), Plekha1(-0.04), Rras(-0.06), Asp…
regulation of signal transduction	0.00291264	0.315034	1.69952e-09	2.47445e-08	28	0.00304657	0.00150477	0.0065578	0.00206316	0.0154212	Spry4(0.66), Spred3(0.6), Runx1(0.44), Spry2(0.44), Birc5(0.33), Naip6(0.3), Spred1(0.3), Acvr1b(0.29), Cnksr3(0.28), Acvr2b(0.22), Birc6(0.22), Naip2(0.2), Ptpn1(0.19), Mgll(0.19), Vwce(0.19), Spred2(0.19), Spry1(0.16), Ppp1r2(0.16), Cdh2(0.15), Furin(0.15), Acvr2a(0.1), Afap1l2(0.1), Afap1(0.04), Cdc42se2(0.04), Nlrc4(-0.06), Igbp1(-0.08), Naip5(-0.14), Ncln(-0.25),
cytokine receptor activity	0.00199327	0.276242	1.76105e-09	2.55352e-08	41	0.0142759	0.00542349	0.0145032	0.00120022	0.000580667	Csf3r(0.82), Csf2rb(0.8), Cntfr(0.62), Il6ra(0.54), Il7r(0.5), Cd44(0.49), Cd44(0.49), Osmr(0.49), Il4ra(0.43), Il31ra(0.4), F3(0.38), Il5ra(0.34), Il22ra1(0.33), Csf2rb2(0.32), Csf2ra(0.3), Flt3(0.26), Flt3(0.26), Il1rl2(0.22), Il6st(0.21), Lifr(0.19), Epor(0.16), Il2rg(0.14), Ifnlr1(0.14), Ifnlr1(0.14), Il21r(0.13), Il21r(0.13), Il11ra1(0.12), Il20rb(0.12), Il13ra1(0.1), Lepr(0.1), Il2rb(0.09),…
negative regulation of fat cell differentiation	0.00232785	0.249332	1.78509e-09	2.57782e-08	45	0.00602254	0.0086961	0.000462352	0.00331893	0.0112053	Jag1(0.55), Id4(0.51), Smad3(0.4), Sirt1(0.4), Lrp6(0.38), Rora(0.33), Vegfa(0.29), Tgfb1(0.28), Ddit3(0.27), Foxo1(0.25), Asxl1(0.24), Ncor2(0.23), Tcf7l2(0.23), Tgfb1i1(0.22), Trib2(0.21), Gata2(0.2), Gata2(0.2), Enpp1(0.2), Enpp1(0.2), Jdp2(0.19), Zfp36l2(0.18), Gata3(0.18), Insig1(0.16), Nucb2(0.15), Zfpm1(0.12), Zfpm2(0.12), Zfpm2(0.12), Ankrd26(0.11), Arntl(0.1), Sort1(0.09), Gper1(0.03), S…
ventricular septum morphogenesis	0.00121413	0.324982	1.8067e-09	2.59841e-08	29	0.13639	0.00541796	0.000143873	0.00185368	0.00125456	Notch1(0.64), Wnt11(0.6), Sox11(0.57), Sox4(0.54), Hey1(0.43), Smad7(0.41), Tgfbr1(0.39), Prox1(0.36), Hey2(0.35), Tbx3(0.35), Gja5(0.34), Heyl(0.29), Cited2(0.27), Rbm15(0.27), Tgfb2(0.23), Tgfb2(0.23), Fzd2(0.22), Acvr1(0.14), Tgfbr2(0.14), Hes1(0.12), Zfpm1(0.12), Zfpm2(0.12), Nfatc1(0.1), Fzd1(0.09), Smad4(0.05), Fgfrl1(-0.03), Sav1(-0.04), Egln1(-0.11), Pitx2(-0.17),
serine-type endopeptidase inhibitor activity	0.00214093	0.220885	1.82435e-09	2.61317e-08	65	0.00242672	0.00235068	0.00321829	0.000416647	0.0691921	Papln(0.74), Slpi(0.71), Serpinb1a(0.66), Serpina3m(0.54), Serpine1(0.52), Serpine1(0.52), Serpinb5(0.5), Serpine2(0.41), Serpine2(0.41), Wfdc17(0.4), Ambp(0.37), Col7a1(0.34), Itih2(0.33), Itih5(0.33), Serpina3n(0.32), Serpinf1(0.3), Crim1(0.29), Cd109(0.29), Tfpi(0.26), Tfpi2(0.26), Serpina1b(0.23), Serpina1b(0.23), Serpinb6b(0.18), Serpinb6b(0.18), Wfdc2(0.18), Wfdc1(0.17), Reck(0.16), Furin(0…
catenin complex	0.00294785	0.444231	1.92734e-09	2.74956e-08	14	0.00221569	0.00439077	0.00722264	0.0239747	0.000516868	Smad7(0.41), Cdh1(0.38), Cdh1(0.38), Apc(0.35), Apc2(0.34), Ctnna1(0.25), Jup(0.19), Jup(0.19), Jup(0.19), Cdh2(0.15), Ctnnb1(0.03), Ctnnb1(0.03), Ctnnb1(0.03), Nectin1(-0.12),
positive regulation of vasoconstriction	0.00122451	0.288527	1.97487e-09	2.80606e-08	37	0.136612	0.00435605	0.000317114	0.0017495	0.000946074	Ptgs2(1.16), Adra1d(0.66), Adra1d(0.66), Gja1(0.63), Tbxas1(0.55), Alox5(0.53), Cd38(0.52), Pdgfb(0.45), Ptafr(0.42), Smad6(0.36), Gja5(0.34), Ptgs1(0.31), Egfr(0.25), Avpr1a(0.24), Avpr1a(0.24), Oxtr(0.22), Cysltr1(0.22), Adra1b(0.18), F2r(0.17), F2r(0.17), Ptger3(0.17), Cav1(0.16), Cav1(0.16), Shc1(0.16), Trpm4(0.11), Adra1a(0.06), Adra1a(0.06), Fgg(0.05), Npy1r(0.04), Fgb(0.03), Casr(-0.06), F…
extracellular matrix organization	0.000700101	0.210617	2.09334e-09	2.96249e-08	79	0.0793364	0.0147869	0.00041274	1.79235e-05	0.0188349	Olfml2b(0.69), Mmp9(0.59), Mmp9(0.59), Foxf1(0.56), Serpinb5(0.5), Csgalnact1(0.41), Vwa1(0.41), Vwa1(0.41), Fn1(0.4), Hspg2(0.4), Ero1lb(0.39), Itga8(0.39), Nid1(0.35), Apbb2(0.34), Spock2(0.34), Tnxb(0.33), Smoc2(0.32), Crispld2(0.3), Elf3(0.29), Nf1(0.29), Adamtsl2(0.29), Adamtsl4(0.29), Tnfrsf11b(0.28), Lgals3(0.27), Pdgfra(0.27), Cyr61(0.26), Abi3bp(0.26), Atxn1l(0.25), Eln(0.23), Tgfb2(0.23…
phosphatidylinositol binding	0.00189136	0.176556	2.11469e-09	2.98079e-08	90	0.0155986	0.0024478	0.0622303	0.000488447	0.000426452	Tub(0.7), Dok7(0.64), Itpr3(0.62), Sh3pxd2a(0.59), Sh3pxd2b(0.57), Pik3c2g(0.52), Snx20(0.43), Ccdc88a(0.43), Fes(0.41), Pld1(0.39), Noxo1(0.36), Ncf1(0.34), Ncf1(0.34), Snx18(0.32), Hip1(0.31), Myo1e(0.3), Zcchc14(0.29), Sept5(0.28), Itpr2(0.26), Tulp4(0.26), Ncf4(0.25), Arhgap32(0.25), Zcchc2(0.24), Snx33(0.23), Pxdc1(0.22), Grb7(0.2), Snx16(0.18), Snx16(0.18), Snx29(0.17), Snx11(0.17), Pld2(0.…
negative regulation of I-kappaB kinase/NF-kappaB signaling	0.0024333	0.253788	2.17633e-09	3.0555e-08	43	0.0211164	0.000516775	0.0258402	0.00773936	0.000283474	Nlrp12(1.12), Nlrp6(0.76), Nfkbid(0.67), Tnfaip3(0.54), Tnfaip3(0.54), Il1rl1(0.51), Zc3h12a(0.46), Zc3h12a(0.46), Per1(0.45), Sirt1(0.4), Esr1(0.37), Rora(0.33), Ash1l(0.32), Dab2ip(0.3), Optn(0.27), Trim59(0.25), Trim59(0.25), Otud7b(0.24), Otud7b(0.24), Tle1(0.21), Abl1(0.19), Nlrc3(0.13), Nlrc3(0.13), Nlrc3(0.13), Ppm1b(0.12), Tank(0.12), Hdac1(0.09), Ripk1(0.08), Tnip1(0.06), Tnip1(0.06), Zm…
anchored component of membrane	0.000677718	0.21648	2.20356e-09	3.08101e-08	78	0.0891527	0.00086157	0.000202151	2.24699e-05	0.153013	Mdga1(0.95), Mmp25(0.83), Gfra1(0.65), Cntfr(0.62), Cd177(0.61), Art3(0.59), Mmp19(0.57), Sema7a(0.54), Ncam1(0.52), Vcam1(0.47), Efna5(0.46), Folr2(0.42), Rtn4rl2(0.38), Tnfrsf23(0.35), Cd24a(0.34), Gfra2(0.34), Cd14(0.3), Cdh13(0.3), Cd109(0.29), Gpc6(0.28), Lypd6b(0.28), Cpm(0.27), Plet1(0.27), Ntng2(0.26), Lsamp(0.26), Dpep2(0.26), Cntn1(0.25), Mmp17(0.25), Ly6a(0.25), Plaur(0.24), Gpihbp1(0.…
positive regulation of epithelial cell proliferation	0.00345072	0.207233	2.21192e-09	3.08101e-08	64	0.0121617	0.0123016	0.0017755	0.000616863	0.00667833	Il6(1.24), Il6(1.24), Nr4a3(0.99), Nog(0.96), Nog(0.96), C5ar2(0.8), Notch1(0.64), C5ar1(0.63), Twist1(0.57), Kdr(0.51), Fgf1(0.45), Nod2(0.4), Esr1(0.37), Glul(0.37), Osr2(0.36), Foxp1(0.34), Fgfr2(0.32), Id1(0.32), Fgf2(0.31), Tgfa(0.3), Ccnd2(0.29), Vegfa(0.29), Tgfb1(0.28), Egfr(0.25), Egfr(0.25), Erbb2(0.25), Erbb4(0.25), Fgf7(0.24), Fgf7(0.24), Tcf7l2(0.23), Esrp1(0.19), Atp7a(0.17), Fgf9(0…
positive regulation of osteoblast differentiation	0.000777025	0.242746	2.37664e-09	3.29747e-08	58	0.381565	0.0114684	7.62117e-05	0.000263495	0.000549454	Gja1(0.63), Sox11(0.57), Jag1(0.55), Ptger4(0.55), Id4(0.51), Gli3(0.43), Gli3(0.43), Hey1(0.43), Sfrp2(0.4), Ddr2(0.38), Cebpd(0.35), Bmp2(0.34), Bmp2(0.34), Bmp2(0.34), Cd276(0.34), Bmpr2(0.32), Fgf2(0.31), Pdlim7(0.3), Runx2(0.29), Runx2(0.29), Vegfa(0.29), Trp63(0.27), Cyr61(0.26), Smad1(0.26), Mef2c(0.26), Acvr2b(0.22), Tmem119(0.22), Tmem119(0.22), Il6st(0.21), Jund(0.21), Zhx3(0.2), Gnas(0…
transforming growth factor beta-activated receptor activity	0.00192722	0.555912	2.39012e-09	3.30322e-08	10	0.070438	0.0034934	0.000653655	0.000180236	0.0161952	Tgfbr1(0.39), Tgfbr1(0.39), Tgfbr1(0.39), Tgfbr3(0.33), Tgfbr3(0.33), Tgfbr3(0.33), Bmpr1b(0.18), Tgfbr2(0.14), Tgfbr2(0.14), Acvrl1(0.11),
artery morphogenesis	0.00161485	0.350511	2.41257e-09	3.32128e-08	24	0.187828	0.00408036	0.000112817	0.00503671	0.000492284	Apob(0.76), Wnt11(0.6), Chd7(0.59), Prdm1(0.57), Prdm1(0.57), Smad7(0.41), Tgfbr1(0.39), Stra6(0.37), Gja5(0.34), Foxc1(0.32), Notch3(0.32), Zmiz1(0.3), Nf1(0.29), Vegfa(0.29), Eng(0.2), Hes1(0.12), Apoe(0.11), Foxc2(0.02), Prrx1(-0.02), Prrx1(-0.02), Rbpj(-0.05), Hoxa1(-0.09), Nrp1(-0.19), Angptl3(-0.26),
visual learning	0.00233372	0.242907	2.48034e-09	3.40133e-08	47	0.0213219	0.027726	0.00113467	0.00344933	0.000361241	Nog(0.96), Drd1(0.69), Drd1(0.69), Atxn1(0.53), Kmt2a(0.53), Cacna1c(0.5), Meis2(0.37), Atp1a2(0.35), Hif1a(0.34), Ndrg4(0.31), Abl2(0.3), Nf1(0.29), Nf1(0.29), Pde8b(0.28), Sgk1(0.26), Braf(0.25), Mecp2(0.24), Ap1s2(0.23), Creb1(0.19), Adra1b(0.18), Kit(0.17), Tanc1(0.17), Syngap1(0.16), Htt(0.15), Hmgcr(0.15), Kras(0.13), Atp1a3(0.12), Itgb1(0.11), Itgb1(0.11), Pde1b(0.09), Pde1b(0.09), Pias1(0…
positive regulation of cell differentiation	0.00269868	0.27052	2.57122e-09	3.51133e-08	38	0.00401676	0.00406108	0.00506722	0.0220675	0.000729806	Gdnf(1.1), Socs3(0.85), Socs3(0.85), Jun(0.69), Junb(0.5), Hsf4(0.44), Apc(0.35), Ctgf(0.35), Bmp2(0.34), Fgf2(0.31), Jak2(0.31), Clu(0.29), Ppp1r13l(0.27), Cyr61(0.26), Smad1(0.26), Sox17(0.22), Sox17(0.22), Wnt9a(0.21), Bmpr1b(0.18), Gata3(0.18), Ccne1(0.17), Smad9(0.17), Btc(0.16), Srf(0.16), Fgfr3(0.12), Map2k1(0.09), Bmp7(0.07), Edn3(0.07), Bmp4(0.01), Nf2(-0.04), Smarca4(-0.04), Men1(-0.06)…
regulation of embryonic development	0.00306768	0.498402	2.58487e-09	3.51133e-08	11	0.0318703	0.00176219	0.000431179	0.0263344	0.00126052	Noct(0.59), Lama4(0.48), Lama5(0.42), Lama2(0.38), Lama3(0.34), Insr(0.32), Lama1(0.32), Nipbl(0.29), Sox17(0.22), Nfe2l2(0.19), Phlda2(-0.32),
podosome	0.00192614	0.332103	2.59032e-09	3.51133e-08	27	0.0197094	0.0658619	0.00350484	0.00156116	6.08886e-05	Adam8(0.71), Adam8(0.71), Sh3pxd2a(0.59), Sh3pxd2a(0.59), Sh3pxd2b(0.57), Vcam1(0.47), Ptpn12(0.39), Gsn(0.28), Src(0.26), Vcl(0.26), Lpxn(0.23), Lpxn(0.23), Asap1(0.21), Tpm4(0.18), Bin2(0.17), Palld(0.16), Fscn1(0.12), Arhgef2(0.12), Tpm3(0.12), Fermt3(0.1), Mapk8(0.07), Actr3(0.06), Kif9(0.05), Cttn(0.03), Lcp1(0.01), Actr2(0.01), Dbnl(-0.1),
peripheral nervous system development	0.00314459	0.412877	2.71034e-09	3.65999e-08	16	0.0946042	0.000210748	0.000596445	0.00887804	0.00474095	Gdnf(1.1), Osm(0.69), Egr3(0.54), Ngf(0.54), Ednrb(0.5), Slc5a3(0.36), Erbb3(0.35), Artn(0.31), Nf1(0.29), Heyl(0.29), Cited2(0.27), Erbb2(0.25), Erbb2(0.25), Ntf3(-0.02), Aldh3a2(-0.07), Nrg1(-0.26),
regulation of axonogenesis	0.0029987	0.352685	2.7369e-09	3.68181e-08	22	0.0207439	0.0270557	0.00203308	0.00120731	0.000763357	Ephb3(0.69), Slit3(0.56), Ret(0.51), Map2(0.47), Kif13b(0.4), Ephb2(0.35), Ust(0.3), Epha4(0.29), Ssh2(0.26), Ssh1(0.24), Gsk3b(0.22), Efna1(0.18), Vim(0.16), Cdh2(0.15), Chn1(0.15), Sipa1l1(0.11), Ssh3(0.08), Wnt7a(0.07), Rufy3(0.07), Mark2(0.06), Cacna1a(0.03), Tpbgl(-0.25),
vascular endothelial growth factor-activated receptor activity	0.00265258	0.546567	3.44342e-09	4.6147e-08	10	0.0801668	0.010714	0.000205	0.00113742	0.00384526	Kdr(0.51), Kdr(0.51), Flt1(0.5), Flt1(0.5), Flt4(0.38), Flt4(0.38), Nrp2(0.38), Pdgfra(0.27), Nrp1(-0.19), Nrp1(-0.19),
positive regulation of vascular endothelial growth factor production	0.0024499	0.380342	4.05927e-09	5.41891e-08	20	0.00897589	0.00807338	0.0157469	0.00212994	0.00092943	Ptgs2(1.16), Il1b(0.69), Il1b(0.69), C5ar1(0.63), Sulf1(0.52), Flt4(0.38), Hif1a(0.34), Rora(0.33), Adora2b(0.32), Ccbe1(0.31), Cyp1b1(0.24), Eif2ak3(0.24), Eif2ak3(0.24), Arnt(0.22), Sulf2(0.15), Atf4(0.12), Hpse(-0.16), C3(-0.34), C3ar1(-0.43), Brca1(-0.77),
voltage-gated calcium channel activity	0.00100904	0.342271	4.07414e-09	5.41891e-08	30	0.581365	0.0331639	7.26014e-06	2.11127e-05	0.00232645	Ryr1(0.74), Cacna2d2(0.66), Cacna2d2(0.66), Cacna2d1(0.55), Itgav(0.53), Cacna1c(0.5), Cacna1c(0.5), Cacna1c(0.5), Cacna1c(0.5), Cacna1h(0.45), Pkd2(0.3), Cacnb1(0.26), Cacnb1(0.26), Catsper2(0.25), Tpcn2(0.25), Cacng7(0.23), Cacna1g(0.22), Cacnb3(0.19), Cacna1d(0.09), Cacnb4(0.08), Cacnb4(0.08), Grm7(0.08), Cacnb2(0.07), Cacna1a(0.03), Cacna1a(0.03), Cacna1a(0.03), Catsper4(-0.08), Tpcn1(-0.14),…
response to muramyl dipeptide	0.00395702	0.471823	4.13731e-09	5.48233e-08	12	0.00310347	0.00149153	0.00748091	0.0156588	0.00475024	Notch1(0.64), Jag1(0.55), Tnfaip3(0.54), Nod2(0.4), Nod2(0.4), Nod2(0.4), Nfkbia(0.33), Rela(0.21), Erbin(0.21), Mapk14(0), Card9(-0.2), Irf5(-0.23),
positive regulation of apoptotic process	0.0020225	0.0987608	4.56157e-09	6.02195e-08	300	0.0309819	0.0290234	0.00195008	9.3714e-05	0.00683824	Il6(1.24), Ptgs2(1.16), Gal(1.01), Pmaip1(0.76), Pmaip1(0.76), Aldh1a3(0.73), Aldh1a3(0.73), Il1b(0.69), Jun(0.69), Gadd45b(0.65), Notch1(0.64), Notch1(0.64), Wnt11(0.6), Mmp9(0.59), Nr4a1(0.58), Dusp1(0.57), Gadd45a(0.55), Igfbp3(0.55), Tlr4(0.55), Unc5c(0.55), Map2k6(0.55), Sox4(0.54), Nos3(0.51), Fam72a(0.48), Bmf(0.48), Bmf(0.48), Adrb2(0.47), Rassf2(0.47), Bcl2l11(0.46), Bcl2l11(0.46), Bcl2l…
defense response to bacterium	0.00217638	0.220058	4.91474e-09	6.46407e-08	64	0.0451652	0.0113838	0.000653232	0.00145358	0.00393135	Clec4d(1.16), Clec4e(1.14), Adamts4(0.97), Tlr6(0.88), Slpi(0.71), Stab2(0.64), Syk(0.63), Cxcl13(0.61), Nos2(0.45), Nos2(0.45), Lyst(0.44), Tlr5(0.44), Mmp7(0.43), Defb1(0.42), Defb42(0.42), Nod2(0.4), Adamts5(0.37), Ncf1(0.34), Wfdc15b(0.32), Slc11a1(0.31), Stab1(0.31), Naip6(0.3), Coch(0.28), Notch2(0.28), Hp(0.26), Tlr1(0.26), Naip2(0.2), Ankrd17(0.18), Fcer1g(0.17), Pglyrp1(0.17), Anxa3(0.1)…
positive regulation of vasodilation	0.0027757	0.294069	5.3576e-09	7.02045e-08	31	0.0151768	0.00413987	0.00878681	0.0266835	0.00011857	Prkg1(0.72), Gja1(0.63), Kdr(0.51), Nos3(0.51), Apln(0.48), Adrb2(0.47), Nos2(0.45), Alox12(0.42), Ptafr(0.42), Sirt1(0.4), Ptprm(0.38), Gja5(0.34), Adora2b(0.32), Egfr(0.25), Kcnmb1(0.24), F2rl1(0.23), F2rl1(0.23), F2rl1(0.23), Ppard(0.16), Kat2b(0.12), Gper1(0.03), Nos1(0.01), Nos1(0.01), Adra2a(-0.03), Ptk2(-0.06), Adm(-0.15), Kcnma1(-0.18), Scpep1(-0.18), Cftr(-0.19), Pla2g6(-0.34), Agt(-0.75…
negative regulation of hormone secretion	0.00319982	0.493356	5.37814e-09	7.02134e-08	11	0.0339922	0.0107058	0.00125725	0.000274615	0.0144902	Il6(1.24), Lif(1.22), Il11(0.9), Osm(0.69), Nmb(0.6), Edn1(0.53), Adora1(0.32), Ptpn11(0.16), Edn3(0.07), Npy1r(0.04), Adipoq(-1.32),
positive regulation of protein phosphorylation	0.00297678	0.125671	5.51519e-09	7.15316e-08	171	0.0169211	0.000525479	0.0416253	0.0077714	0.000625514	Cxcr4(0.86), Il1b(0.69), Musk(0.67), Musk(0.67), Dok7(0.64), Mmp9(0.59), Ptger4(0.55), Map2k6(0.55), Ngf(0.54), Ngf(0.54), Sema7a(0.54), Kdr(0.51), Ednrb(0.5), Ednra(0.48), Tnik(0.47), Fgf1(0.45), Akap6(0.44), Ager(0.42), Hipk2(0.42), Sirt1(0.4), Grk3(0.4), Mapk15(0.4), Flt4(0.38), Sphk1(0.36), Ctgf(0.35), Map3k5(0.35), Bmp2(0.34), Rock2(0.34), Ep300(0.33), Bmpr2(0.32), Insr(0.32), P2rx7(0.32), F…
calcium ion transport	0.00100867	0.179664	5.51954e-09	7.15316e-08	103	0.224671	0.0227881	0.000986273	6.12669e-06	0.00533104	Atp2a1(0.84), Trpm6(0.83), Ryr1(0.74), Ryr1(0.74), Cyp27b1(0.69), Cacna2d2(0.66), Cacna2d2(0.66), Itpr3(0.62), Ccr1(0.6), Cacna2d1(0.55), Cacna1c(0.5), Cacna1c(0.5), Cacna1c(0.5), Cacna1h(0.45), Cacna1h(0.45), Slc24a3(0.43), Ramp3(0.4), Trpm2(0.39), Pkd1l3(0.36), P2rx7(0.32), Calcrl(0.32), Pkd2(0.3), Pkd2(0.3), Gja4(0.27), Cacnb1(0.26), Itpr2(0.26), Pkd1(0.25), Catsper2(0.25), Tpcn2(0.25), Trpc1(…
trophoblast giant cell differentiation	0.00411751	0.433112	6.86357e-09	8.86253e-08	14	0.0295725	0.00242586	0.00663142	0.00418888	0.00200929	Lif(1.22), Socs3(0.85), Socs3(0.85), E2f7(0.85), Prdm1(0.57), Itgav(0.53), Hectd1(0.43), Mdfi(0.38), Gjb5(0.34), Erf(0.24), Snai1(0.18), Nr2f2(0.06), Senp2(-0.02), Plk4(-0.48),
insulin receptor signaling pathway	0.00381246	0.2168	7.16138e-09	9.18839e-08	57	0.0258827	0.00204204	0.00360938	0.00895763	0.00250232	Irs2(0.49), Irs2(0.49), Soga1(0.47), Sh2b2(0.46), Irs1(0.4), Irs1(0.4), Insr(0.32), Insr(0.32), Phip(0.31), Sik2(0.31), Kl(0.27), Plcb1(0.27), Foxo1(0.25), Rhoq(0.22), Pik3r1(0.19), Pik3r1(0.19), Ptpn1(0.19), Socs7(0.18), Cav2(0.16), Shc1(0.16), Shc1(0.16), Baiap2(0.16), Ptpn2(0.11), Pik3r3(0.09), Srsf3(0.09), Srebf1(0.09), Appl1(0.06), Foxo4(0.05), Pdk4(0.04), Pdk4(0.04), Baiap2l1(0.04), Bcar1(0…
negative regulation of myoblast differentiation	0.00382497	0.381642	7.16788e-09	9.18839e-08	18	0.00611978	0.0026459	0.017148	0.0146084	0.00101431	Notch1(0.64), Ankrd2(0.57), Ankrd2(0.57), Il1f9(0.47), Dll1(0.45), Mbnl3(0.42), Id3(0.39), Cxcl10(0.39), Tbx3(0.35), Cxcl14(0.35), Tgfb1(0.28), Ddit3(0.27), Ppard(0.16), Il18(0.04), Sox9(0.04), Ccl9(0.03), Bmp4(0.01), Tnf(-0.19),
neural crest cell migration	0.00211737	0.276808	7.77785e-09	9.93431e-08	36	0.0586881	0.0578424	5.96734e-05	0.00581543	0.000856245	Gdnf(1.1), Sema3e(0.69), Sema6d(0.65), Sema4c(0.62), Sema7a(0.54), Ret(0.51), Ednrb(0.5), Lama5(0.42), Sema6b(0.42), Sema3f(0.39), Sema5b(0.39), Nrp2(0.38), Kitl(0.37), Hif1a(0.34), Zeb2(0.32), Sema3d(0.31), Sema3g(0.3), Ovol2(0.29), Sema6a(0.26), Erbb4(0.25), Sema4b(0.22), Sema4g(0.22), Efnb1(0.2), Acvr1(0.14), Phactr4(0.09), Edn3(0.07), Sema5a(0.03), Sema4d(0.01), Cfl1(-0.06), Sema4a(-0.07), Co…
positive regulation of leukocyte chemotaxis	0.00339838	0.48775	8.22495e-09	1.04676e-07	11	0.00898253	0.00302194	0.0225454	0.00277865	0.00311105	Cxcl5(1.3), Ppbp(1.22), Cxcr2(1.09), Pf4(0.71), Cxcl13(0.61), Cxcl10(0.39), Cxcl10(0.39), Gpsm3(0.26), F2rl1(0.23), Edn3(0.07), Zfp580(-0.13),
basal plasma membrane	0.00261287	0.271176	8.90695e-09	1.12949e-07	36	0.0208592	0.0109643	0.000174508	0.00200509	0.0349673	C5ar2(0.8), P2ry12(0.74), Cldn4(0.69), Trf(0.61), Plec(0.56), Ager(0.42), Itgb4(0.4), Itga9(0.36), Slc23a2(0.34), Slc23a2(0.34), Bmpr2(0.32), Pkd2(0.3), Erbb2(0.25), Shroom4(0.25), Itga6(0.24), Tacstd2(0.22), Ldlrap1(0.21), Rapgef3(0.21), Slco2b1(0.18), Cav1(0.16), Cd34(0.11), Myo1c(0.11), Met(0.1), Aqp1(0.08), Aqp1(0.08), Aqp4(0.08), Ank3(0.06), Dlg1(0.06), Eps15(-0.09), Slc23a1(-0.09), Slc23a1(…
collagen binding	0.000864166	0.247987	9.08347e-09	1.14776e-07	56	0.170014	0.0253479	0.000356929	9.70304e-06	0.0215892	Srgn(0.55), C1qtnf1(0.52), Tll1(0.5), Pdgfb(0.45), Itga2(0.44), Smad7(0.41), Smad3(0.4), Ddr2(0.38), Ddr2(0.38), Itga9(0.36), Nid1(0.35), Nid1(0.35), Thbs4(0.35), Tnxb(0.33), Ccbe1(0.31), Itga3(0.3), Coch(0.28), Pdgfa(0.28), Dcn(0.27), Map1a(0.26), Abi3bp(0.26), Antxr1(0.23), Tgfbi(0.22), Cspg4(0.19), Adam9(0.18), Itga1(0.16), Podn(0.16), Sparcl1(0.15), Vwf(0.12), Itgb1(0.11), Ap1g1(0.1), Ctss(0.…
positive regulation of epithelial to mesenchymal transition	0.00171924	0.266253	9.48668e-09	1.19444e-07	40	0.023233	0.0389443	0.0225869	0.000147038	0.000707716	Notch1(0.64), Notch1(0.64), Twist1(0.57), Twist1(0.57), Glipr2(0.5), Ager(0.42), Smad3(0.4), Tgfbr1(0.39), Gcnt2(0.38), Gcnt2(0.38), Bmp2(0.34), Bmp2(0.34), Zfp703(0.31), Tgfb3(0.3), Tgfb3(0.3), Bambi(0.3), Tgfb1(0.28), Tgfb1(0.28), Rgcc(0.27), Tgfb2(0.23), Tgfb1i1(0.22), Snai1(0.18), Snai1(0.18), Tgfbr2(0.14), Ezh2(0.12), Sdcbp(0.06), Bcl9l(0.06), Smad4(0.05), Epb41l5(0.04), Ctnnb1(0.03), Ctnnb1…
insulin-like growth factor I binding	0.00068605	0.467297	9.68954e-09	1.21566e-07	17	0.371321	0.116418	4.0009e-06	1.32729e-05	0.00881757	Igfbp1(0.71), Igfbp1(0.71), Itgb3(0.67), Igfbp3(0.55), Igfbp3(0.55), Itgav(0.53), Itgb4(0.4), Igf1r(0.33), Insr(0.32), Igfbp5(0.28), Igfbp5(0.28), Itga6(0.24), Igfbp6(0.05), Igfbp6(0.05), Igfbp4(-0.27), Igfbp2(-0.92), Igfbp2(-0.92),
positive regulation of sequence-specific DNA binding transcription factor activity	0.00306216	0.166115	1.02056e-08	1.27588e-07	95	0.0287879	0.011551	0.0147057	0.00104735	0.000916963	Il6(1.24), Trim15(1.08), Il1b(0.69), Tlr4(0.55), Ngf(0.54), Arid5b(0.54), Arid5b(0.54), Edn1(0.53), Nfam1(0.53), Nfam1(0.53), Hipk2(0.42), Crebbp(0.4), Hmga2(0.4), Lrp6(0.38), Lrp6(0.38), Ddr2(0.38), Esr1(0.37), Myocd(0.37), Myocd(0.37), Plpp3(0.36), Plpp3(0.36), Ep300(0.33), Ep300(0.33), Ep300(0.33), Ifrd1(0.32), Jak2(0.31), Fzd4(0.29), Fzd4(0.29), Prkd2(0.29), Rgcc(0.27), Hdac4(0.27), Ncoa3(0.2…
positive regulation of interleukin-6 biosynthetic process	0.00486544	0.506888	1.05036e-08	1.30851e-07	10	0.012289	0.0279953	0.0110213	0.00177187	0.000775604	Tlr6(0.88), Ereg(0.79), Il1b(0.69), Tlr4(0.55), Ptafr(0.42), Tlr1(0.26), Tirap(0.21), Tirap(0.21), Tirap(0.21), Traf6(0.11),
trans-Golgi network	0.00437824	0.129911	1.07607e-08	1.33583e-07	154	0.0197272	0.0384057	0.00624107	0.0026179	0.00033552	Bsn(0.54), Nbea(0.47), Nmnat2(0.44), Chst2(0.43), Flna(0.42), Azin2(0.4), Cdh1(0.38), Slc9a7(0.37), Sorl1(0.36), Wipi1(0.35), Pclo(0.34), Rab30(0.34), Rab30(0.34), Fnbp1l(0.29), Ap3b2(0.28), Atp8a1(0.27), Optn(0.27), Clasp2(0.25), Nck2(0.24), Atp9b(0.24), Atp9b(0.24), Dennd5a(0.23), Tgfb2(0.23), Lrrk2(0.23), Birc6(0.22), Tgfbi(0.22), Fam109a(0.21), Tjap1(0.2), Prkd1(0.18), Prkd1(0.18), Rab31(0.18…
leukocyte cell-cell adhesion	0.000813265	0.347734	1.08454e-08	1.34164e-07	29	0.322591	0.102626	0.00129283	0.000348352	5.76775e-06	Sele(0.85), Selp(0.72), Selp(0.72), Syk(0.63), Itga5(0.48), Vcam1(0.47), Vcam1(0.47), Olr1(0.47), Itgam(0.44), Cd24a(0.34), Ptprc(0.31), Itga4(0.27), Itga4(0.27), Rock1(0.25), Itgal(0.24), Itgal(0.24), Itgal(0.24), Itgb2(0.18), L1cam(0.12), Itgb1(0.11), Umod(0.11), Fermt3(0.1), Fermt3(0.1), Tnip1(0.06), Icam1(-0.13), Icam1(-0.13), Nt5e(-0.21), Apoa4(-0.26), Ccl5(-0.34),
I-kappaB kinase/NF-kappaB signaling	0.00364818	0.272029	1.1286e-08	1.39129e-07	35	0.0257809	0.00129217	0.101583	0.00114612	0.00064143	Tlr8(0.71), Rel(0.66), Rel(0.66), Btk(0.37), Rock2(0.34), Ripk3(0.28), Map3k14(0.26), Rock1(0.25), Tnip2(0.25), Nfkb1(0.21), Tirap(0.21), Tirap(0.21), Malt1(0.2), Relb(0.18), Irf1(0.17), Bcl10(0.16), Bcl10(0.16), Nlrc3(0.13), Nlrc3(0.13), Tank(0.12), Traf6(0.11), Irak2(0.11), Nfkb2(0.06), Snip1(0.06), Bcl3(0.04), Tifa(0.04), Azi2(0.03), Ripk2(0.03), Ikbkb(0), Edaradd(-0.05), Nfkbil1(-0.13), Irak1…
Golgi organization	0.00532285	0.176274	1.15006e-08	1.41281e-07	85	0.00281044	0.00352598	0.013488	0.0126793	0.00489209	Cit(0.6), Atp8b4(0.48), Rab30(0.34), Atp8b1(0.32), Syne1(0.32), Atp8b2(0.27), Optn(0.27), Cul7(0.25), Clasp2(0.25), Plekhm2(0.24), Lrrk2(0.23), Lrrk2(0.23), Cltc(0.22), Dync2h1(0.22), Arhgap21(0.21), Tjap1(0.2), Trip11(0.19), Prkd1(0.18), Usp6nl(0.17), Htt(0.15), Vcpip1(0.15), Clasp1(0.14), Hace1(0.14), Cog3(0.14), Csnk1d(0.12), Gbf1(0.11), Arhgef7(0.1), Golph3(0.1), Golga5(0.09), Golga5(0.09), S…
adenylate cyclase activity	0.00227558	0.397129	1.18739e-08	1.45363e-07	20	0.244486	0.00399493	0.00029288	0.00181082	0.00263316	Adcy1(0.48), Adcy1(0.48), Adcy3(0.29), Adcy3(0.29), Adcy3(0.29), Adcy4(0.28), Adcy4(0.28), Adcy9(0.19), Adcy9(0.19), Gucy1a3(0.16), Gucy1b3(0.1), Adcy5(0.1), Adcy5(0.1), Adcy5(0.1), Adcy6(0.09), Adcy6(0.09), Adcy6(0.09), Adcy7(0.01), Adcy7(0.01), Adcy7(0.01),
positive regulation of fat cell differentiation	0.00170707	0.242391	1.23973e-08	1.51246e-07	53	0.108084	0.0316399	0.000455792	0.000135699	0.00789426	Noct(0.59), Sh3pxd2b(0.57), Ccdc3(0.49), Zc3h12a(0.46), Zc3h12a(0.46), Zc3h12a(0.46), Medag(0.45), Sfrp2(0.4), Dact1(0.4), Zfp36(0.37), Bmp2(0.34), Frzb(0.34), Zfp36l1(0.32), Klf5(0.32), Zbtb16(0.32), Zbtb7c(0.28), Snai2(0.27), Snai2(0.27), Fndc3b(0.27), Fndc3b(0.27), Wdfy2(0.27), Wdfy2(0.27), Pparg(0.23), Pparg(0.23), Pparg(0.23), Pparg(0.23), Creb1(0.19), Cmklr1(0.19), Sult1e1(0.13), Igf1(0.12)…
motor neuron axon guidance	0.00318279	0.356864	1.24617e-08	1.5151e-07	21	0.159565	0.00950471	9.96136e-05	0.000718663	0.0133878	Nog(0.96), Cxcr4(0.86), Plxna4(0.54), Etv4(0.5), Sema3a(0.42), Egr2(0.36), Foxp1(0.34), Slit2(0.31), Epha4(0.29), Erbb2(0.25), Mycbp2(0.24), Rnf165(0.21), Lhx1(0.16), Chn1(0.15), Alcam(0.14), Cxcl12(0.13), Kif5c(0.12), Hoxa2(0), Cdk5(-0.09), Hoxa1(-0.09), Nrp1(-0.19),
ubiquitin protein ligase activity	0.00235772	0.133358	1.258e-08	1.52425e-07	212	0.00237704	0.00489663	0.229253	0.000145255	0.00358851	Rnf125(0.64), Asb4(0.61), Cbl(0.48), Hectd1(0.43), Rnf122(0.42), Rnf180(0.38), Rnf144b(0.34), Ubr2(0.34), Ubr2(0.34), Rnf38(0.33), Cblb(0.32), Fbxo30(0.3), Rlim(0.29), Msl2(0.29), Neurl3(0.29), Trim56(0.29), G2e3(0.28), Smurf1(0.27), Neurl1a(0.25), Trim59(0.25), Rnf19b(0.25), Znrf1(0.24), Znrf1(0.24), Rabgef1(0.23), Med12(0.23), Peli1(0.23), Rnf19a(0.22), Rnf146(0.22), Rnf165(0.21), Rnf111(0.2), …
placenta blood vessel development	0.00579484	0.459647	1.30106e-08	1.57104e-07	12	0.0105074	0.0192697	0.00307369	0.00567276	0.0025699	Socs3(0.85), Vash2(0.64), Vash1(0.57), Arid1a(0.31), Pkd2(0.3), Notch2(0.28), Rbm15(0.27), Pkd1(0.25), Map2k1(0.09), Nr2f2(0.06), Spint1(0.01), Fosl1(-0.01),
negative regulation of ERK1 and ERK2 cascade	0.00426331	0.201901	1.31564e-08	1.58324e-07	63	0.00489253	0.00686444	0.0102671	0.00383203	0.00793934	Lif(1.22), Nlrp12(1.12), Atf3(0.99), Nlrp6(0.76), Spry4(0.66), Dusp1(0.57), Tlr4(0.55), Tbc1d10c(0.49), Tbc1d10c(0.49), Spry2(0.44), Spry2(0.44), Errfi1(0.39), Dusp6(0.35), Dusp6(0.35), Klf4(0.3), Dab2ip(0.3), Cnksr3(0.28), Ndrg2(0.23), Flcn(0.22), Dusp4(0.22), Timp3(0.21), Abl1(0.19), Ptpn1(0.19), Ptprr(0.17), Rapgef1(0.17), Arrb1(0.17), Cav1(0.16), Spry1(0.16), Spry1(0.16), Spry1(0.16), Igf1(0.…
embryonic hindlimb morphogenesis	0.00326928	0.306211	1.53258e-08	1.83806e-07	28	0.118435	0.0489386	0.00235723	0.000524383	0.000289247	Aff3(0.88), Aff3(0.88), Notch1(0.64), Chd7(0.59), Twist1(0.57), Lrp6(0.38), Lrp6(0.38), Osr2(0.36), Osr2(0.36), Tbx3(0.35), Rarb(0.34), Zbtb16(0.32), Zbtb16(0.32), Rarg(0.27), Gnas(0.19), Gpc3(0.17), Dicer1(0.16), Mecom(0.13), Osr1(0.08), Wnt7a(0.07), Wnt7a(0.07), Med1(0.05), Ctnnb1(0.03), Bmp4(0.01), Smarca4(-0.04), Lmbr1(-0.13), Rpgrip1l(-0.16), Pitx2(-0.17),
extracellular matrix structural constituent	0.00144834	0.350565	1.55107e-08	1.85395e-07	25	0.122961	0.00432258	0.0037672	0.00682352	0.000277038	Col11a2(0.83), Col24a1(0.58), Impg2(0.56), Vcan(0.4), Lamb1(0.38), Col5a2(0.37), Col4a2(0.36), Lamc1(0.36), Col4a1(0.32), Lama1(0.32), Fbn1(0.3), Fbn1(0.3), Col3a1(0.27), Eln(0.23), Col4a4(0.22), Col4a4(0.22), Col4a3(0.2), Fbln1(0.11), Pxdn(0.07), Col5a1(-0.04), Mgp(-0.09), Prelp(-0.12), Col27a1(-0.16), Col1a2(-0.19), Col1a1(-0.39),
neuron projection morphogenesis	0.00425679	0.21163	1.59185e-08	1.89629e-07	57	0.0540225	0.0178764	0.00164148	0.000938797	0.00449928	Gja1(0.63), Gas7(0.62), Ngf(0.54), Plxna4(0.54), Kdr(0.51), Zswim6(0.47), Cntnap1(0.44), Nbl1(0.4), Plxnb1(0.39), Brsk1(0.37), Thbs4(0.35), Slit2(0.31), Slit2(0.31), Dab2ip(0.3), Clu(0.29), Nyap1(0.27), Sgk1(0.26), Sgk1(0.26), Egfr(0.25), Lrrk2(0.23), Epb41l3(0.2), Adora2a(0.19), Lifr(0.19), Wee1(0.18), Wee1(0.18), Atp7a(0.17), Itga1(0.16), Dicer1(0.16), Ntf5(0.15), Als2(0.12), Srgap2(0.1), Pacsi…
regulation of RNA splicing	0.00531515	0.324331	1.60196e-08	1.89634e-07	24	0.00662082	0.025567	0.00234721	0.00556759	0.00505583	Aff2(0.83), Prx(0.56), Ahnak(0.52), Clk1(0.48), Mbnl3(0.42), Clk4(0.37), Cdk12(0.33), Son(0.3), Hnrnph1(0.28), Zfp326(0.23), Rbfox2(0.22), Mbnl2(0.2), Clk2(0.19), Esrp1(0.19), Clk3(0.14), Aggf1(0.07), Brdt(0.07), Snrnp70(0.04), Mbnl1(-0.03), Fastk(-0.07), Esrp2(-0.08), Hnrnpf(-0.11), Pqbp1(-0.13), Rbm38(-0.41),
positive regulation of synaptic transmission, glutamatergic	0.00333608	0.400335	1.60261e-08	1.89634e-07	16	0.158622	0.00850972	4.49939e-05	0.00243213	0.0123305	Ptgs2(1.16), Ntrk2(0.94), Drd1(0.69), Shank3(0.61), Reln(0.45), Reln(0.45), Glul(0.37), Egfr(0.25), Gria4(0.24), Oxtr(0.22), Adora2a(0.19), Ngfr(0.14), Ptk2b(0.12), Iqsec2(0.09), Shank2(0.03), Nlgn2(-0.03),
chloride transmembrane transport	0.0046972	0.28587	1.67198e-08	1.96266e-07	31	0.0419329	0.0144083	0.000432057	0.00424618	0.00674508	Slc26a4(0.78), Gabrb1(0.56), Ano1(0.46), Ano1(0.46), Ano1(0.46), Gabrb3(0.34), Gabrb3(0.34), Clcnkb(0.32), Best1(0.31), Clcn6(0.29), Ttyh1(0.29), Clic4(0.25), Slc4a3(0.24), Clcnka(0.23), Ano6(0.22), Ano6(0.22), Clic5(0.17), Slc26a2(0.12), Slc12a7(0.11), Slc12a5(0.1), Clcn2(0.06), Clcn3(0.06), Clcn3(0.06), Clic1(0.05), Slc26a11(0.05), Clcn7(0.03), Clcn4(-0.08), Clcn5(-0.11), Cftr(-0.19), Cftr(-0.1…
response to cytokine	0.0040235	0.226498	1.67249e-08	1.96266e-07	50	0.0139189	0.0396422	0.000302884	0.00915859	0.00458344	Ptgs2(1.16), Jun(0.69), Rel(0.66), Il6ra(0.54), Serpina3m(0.54), Junb(0.5), Osmr(0.49), Timp1(0.45), Pml(0.32), Serpina3n(0.32), Col3a1(0.27), Bcl2(0.24), Bcl2(0.24), Serpina1b(0.23), Tnfrsf11a(0.23), Il6st(0.21), Jund(0.21), Mcl1(0.21), Nfkb1(0.21), Rela(0.21), Stat3(0.21), Timp2(0.21), Lifr(0.19), Relb(0.18), Synj1(0.18), Srf(0.16), Coro1a(0.15), Aldh1a2(0.14), Cd274(0.14), Pggt1b(0.11), Cxcl16…
positive regulation of T cell proliferation	0.00106409	0.26021	1.67531e-08	1.96266e-07	48	0.116059	0.107559	0.000853287	0.000727829	0.000163623	Cd80(1.41), Cd80(1.41), Il6(1.24), Slc4a1(0.91), Havcr2(0.71), Il1b(0.69), Vcam1(0.47), Prkcq(0.46), Ceacam1(0.41), Cd276(0.34), Cd276(0.34), Anxa1(0.33), Ptprc(0.31), Il15(0.3), Cd46(0.3), Jak3(0.29), Jak3(0.29), Itgal(0.24), Nck2(0.24), Il6st(0.21), Efnb1(0.2), Cd86(0.16), Cd86(0.16), Nckap1l(0.16), Coro1a(0.15), Pnp(0.15), Pnp(0.15), Tnfsf13b(0.15), Cd274(0.14), Carmil2(0.13), Hes1(0.12), Traf…
memory	0.0037584	0.224456	1.681e-08	1.96283e-07	51	0.0620306	0.0489999	0.0010082	0.000788745	0.00183079	Ptgs2(1.16), Nog(0.96), Plk2(0.7), Drd1(0.69), Il1b(0.69), Musk(0.67), Il1rn(0.62), Itpr3(0.62), Shank3(0.61), Ngf(0.54), Itga5(0.48), Lmx1b(0.4), Itga8(0.39), Kalrn(0.39), Pak6(0.34), Ptgs1(0.31), Itga3(0.3), Kmt2b(0.28), Plcb1(0.27), Mecp2(0.24), Oxtr(0.22), Abca7(0.2), Creb1(0.19), Fen1(0.16), Igf2(0.16), Igf1(0.12), Atp1a3(0.12), Trpm7(0.08), Grm7(0.08), B4galt2(0.07), Rin1(0.06), Adrb1(0.04)…
actin cytoskeleton reorganization	0.00538404	0.22433	1.89614e-08	2.20676e-07	50	0.00718943	0.0104679	0.00407794	0.0370675	0.000932797	S100a9(0.76), Plek(0.65), S1pr1(0.59), Cckar(0.56), Tnik(0.47), Flna(0.42), Myh9(0.39), Ptk7(0.34), Parvb(0.34), Anxa1(0.33), Rictor(0.31), Rictor(0.31), Lpin1(0.3), Cdc42bpb(0.28), Fgf7(0.24), Sptan1(0.23), Antxr1(0.23), Cdc42bpa(0.22), Cxadr(0.21), Ptpn1(0.19), Gpr65(0.17), Kit(0.17), Shc1(0.16), Rap2a(0.11), Sipa1l1(0.11), Pip5k1a(0.1), Phactr1(0.1), Nphs2(0.09), Eps8(0.08), Fer(0.07), Pak1(0.…
protein domain specific binding	0.00502012	0.102929	2.05891e-08	2.38834e-07	242	0.000934103	0.0163132	0.0256378	0.00559685	0.00564462	Hpcal4(0.72), Il1b(0.69), Stx1b(0.69), Gja1(0.63), Syk(0.63), Twist1(0.57), Rab27b(0.51), Cacna1c(0.5), Irs2(0.49), Cep250(0.43), Bhlhe40(0.43), Nphs1(0.41), Irs1(0.4), Tjp1(0.4), Sirt1(0.4), Id3(0.39), Myh9(0.39), Myh9(0.39), Cdh1(0.38), Bmp2(0.34), Ddx6(0.34), Stx1a(0.34), Rassf9(0.33), Tacc1(0.33), Insr(0.32), Plxnd1(0.32), Zbtb16(0.32), Tuba1a(0.31), Itga3(0.3), Runx2(0.29), Ercc1(0.29), Gsn(…
epithelial to mesenchymal transition	0.00354355	0.300721	2.08307e-08	2.40846e-07	29	0.0456363	0.0420965	0.0111516	0.000386403	0.000690158	Nog(0.96), Fam83d(0.65), Notch1(0.64), Wnt11(0.6), Flna(0.42), Tgfbr1(0.39), Bmp2(0.34), Hif1a(0.34), Tgfbr3(0.33), Fgfr2(0.32), Tgfb1(0.28), Snai2(0.27), Snai2(0.27), Cul7(0.25), Loxl2(0.24), Tgfb2(0.23), Gsk3b(0.22), Snai1(0.18), Snai1(0.18), Snai1(0.18), Nfatc1(0.1), Sox9(0.04), Epb41l5(0.04), Ppp3r1(-0.02), Rbpj(-0.05), Rflnb(-0.05), Loxl3(-0.09), Trim28(-0.13), Hnrnpab(-0.3),
cellular response to fibroblast growth factor stimulus	0.00399479	0.403024	2.1836e-08	2.51647e-07	16	0.180955	0.00230654	0.00174101	0.0148296	0.000334064	Nr4a1(0.58), Egr3(0.54), Cd44(0.49), Dll4(0.44), Zfp36(0.37), Zfp36(0.37), Setx(0.34), Zfp36l1(0.32), Iqgap1(0.22), Dstyk(0.22), Zfp36l2(0.18), Zfp36l2(0.18), Hyal1(0.12), Sfrp1(0.02), Itgb1bp1(-0.21), Hyal2(-0.27),
hippo signaling	0.00519385	0.29406	2.20512e-08	2.53303e-07	29	0.0173085	0.00891224	0.0125367	0.00119337	0.0065758	Tead4(0.5), Fat4(0.49), Amotl1(0.47), Tead1(0.26), Tead1(0.26), Lats2(0.26), Lats2(0.26), Dchs1(0.25), Tead3(0.23), Lats1(0.17), Lats1(0.17), Tead2(0.15), Amotl2(0.14), Yap1(0.12), Pja2(0.12), Mob1a(0.05), Mob1b(0.03), Limd1(0.01), Stk4(0), Stk4(0), Stk4(0), Wwtr1(0), Ajuba(-0.03), Sav1(-0.04), Sav1(-0.04), Stk3(-0.05), Stk3(-0.05), Amot(-0.08), Wtip(-0.29),
locomotory behavior	0.00375226	0.190137	2.4342e-08	2.78712e-07	71	0.175405	0.0193554	3.13618e-05	0.00144003	0.0133028	Chrnb4(0.9), Olfm2(0.75), Aldh1a3(0.73), Drd1(0.69), Drd1(0.69), Drd1(0.69), Shank3(0.61), Chd7(0.59), Gnao1(0.53), Reln(0.45), Reln(0.45), Rasd2(0.45), Rasd2(0.45), Lmx1b(0.4), Tal1(0.35), Pak6(0.34), Nav2(0.32), Strn(0.28), Penk(0.27), Celsr1(0.26), Slc18a2(0.24), Npas3(0.22), Atp2b2(0.21), Apba1(0.2), Adora2a(0.19), Adora2a(0.19), Meis1(0.19), Myo6(0.19), Adra1b(0.18), Chrna4(0.17), Atp7a(0.17…
negative regulation of neuron differentiation	0.00448338	0.212533	2.72015e-08	3.10289e-07	56	0.0849162	0.03952	0.000921705	0.00667252	0.000292922	Il1b(0.69), Notch1(0.64), Notch1(0.64), Notch1(0.64), Cit(0.6), Jag1(0.55), Id4(0.51), Dll1(0.45), Gli3(0.43), Hey1(0.43), Rest(0.39), Cd24a(0.34), Ddx6(0.34), Notch3(0.32), Rtn4(0.25), Casz1(0.24), Cdk5rap2(0.24), Dixdc1(0.24), Aspm(0.23), Meis1(0.19), Eif2ak4(0.17), Cav1(0.16), Hes1(0.12), Hes1(0.12), Itgb1(0.11), Bex1(0.11), Foxo3(0.1), Mib1(0.1), Eif4enif1(0.09), Bmp7(0.07), Bmp7(0.07), Id2(0…
regulation of inflammatory response	0.00307935	0.2237	2.72752e-08	3.10289e-07	52	0.0203313	0.0894978	0.00140721	0.00210808	0.0017774	S100a9(0.76), Nlrp6(0.76), S100a8(0.74), Tlr4(0.55), Sema7a(0.54), Il1r1(0.49), Fabp4(0.48), Sbno2(0.48), Sbno2(0.48), Nlrp3(0.48), Nr1d2(0.44), Casp4(0.43), Ager(0.42), Mas1(0.41), Mas1(0.41), Nod2(0.4), Esr1(0.37), Slc7a2(0.36), Anxa1(0.33), Jak2(0.31), Rictor(0.31), Bcl6(0.25), Il1rl2(0.22), Rela(0.21), Rela(0.21), Mgll(0.19), Clcf1(0.18), Tbc1d23(0.18), Adamts12(0.18), Dicer1(0.16), Lyn(0.11)…
blood coagulation	0.00427309	0.201341	2.79325e-08	3.16748e-07	64	0.078472	0.0192482	0.0119499	0.000243033	0.00178806	Thbd(0.8), P2ry12(0.74), F10(0.62), F13a1(0.52), F13a1(0.52), F5(0.49), F5(0.49), F5(0.49), Pdgfb(0.45), Lyst(0.44), Ptprj(0.43), Serpine2(0.41), Nbeal2(0.41), Pros1(0.39), F3(0.38), F3(0.38), Mmrn1(0.32), Mmrn1(0.32), Proz(0.29), Proz(0.29), Pdgfa(0.28), Kng1(0.27), Tfpi(0.26), Tfpi2(0.26), Procr(0.25), F2rl1(0.23), Ano6(0.22), Hps5(0.2), Papss2(0.18), F2r(0.17), Vwf(0.12), Vwf(0.12), Serpinc1(0…
negative regulation of microtubule depolymerization	0.00536193	0.343268	2.80554e-08	3.17124e-07	21	0.0227839	0.0333238	0.00315532	0.00887987	0.000667427	Map1b(0.51), Eml4(0.42), Hdgfrp3(0.39), Mid1(0.37), Apc(0.35), Apc(0.35), Apc2(0.34), Map1a(0.26), Clasp2(0.25), Clasp2(0.25), Clasp2(0.25), Specc1l(0.16), Clasp1(0.14), Clasp1(0.14), Arhgef2(0.12), Mid1ip1(0.05), Hdac6(0.02), Katnb1(-0.03), Gas2l1(-0.07), Cib1(-0.27), Ckap2(-0.29),
positive regulation of neuron differentiation	0.00423621	0.191673	2.89902e-08	3.26647e-07	68	0.14397	0.0231324	0.00880439	0.000191907	0.000815917	Il6(1.24), Sox11(0.57), Sox11(0.57), Sox11(0.57), Ngf(0.54), Map1b(0.51), Nbl1(0.4), Zeb1(0.4), Fgfr1(0.36), Socs2(0.36), Tcf4(0.35), Bmp2(0.34), Rarb(0.34), Mapk8ip3(0.3), Heyl(0.29), Heyl(0.29), Mmd(0.29), Tgif1(0.28), Mef2c(0.26), Spag9(0.26), Bcl6(0.25), Kctd11(0.25), Dnmt3b(0.21), Timp2(0.21), Gata2(0.2), Cdon(0.18), Cdon(0.18), Ngfr(0.14), Rara(0.14), Bnip2(0.13), Ncoa1(0.13), Cxcl12(0.13),…
ion channel activity	0.00190356	0.201134	3.19913e-08	3.59319e-07	79	0.225093	0.0115154	7.99487e-06	0.000314629	0.0917948	Chrnb4(0.9), Kcnc2(0.86), Trpm6(0.83), Ryr1(0.74), Hvcn1(0.66), Itpr3(0.62), Gabrb1(0.56), Cacna1c(0.5), Cacna1h(0.45), Kcna5(0.4), Trpm2(0.39), Gjc1(0.37), Kcnh2(0.35), Gabrb3(0.34), P2rx7(0.32), Clcnkb(0.32), Kcns3(0.3), Clcn6(0.29), Gabra3(0.28), Fxyd5(0.27), Kcnd3(0.27), Itpr2(0.26), Catsper2(0.25), Tpcn2(0.25), Gria4(0.24), Clcnka(0.23), Trpc1(0.23), Kcnk3(0.2), Chrna4(0.17), Chrnb1(0.16), F…
cell chemotaxis	0.00210279	0.259917	3.30857e-08	3.70434e-07	45	0.365674	0.0768778	0.000124449	0.00115221	0.000161212	Fpr1(0.97), Ccl6(0.82), C5ar2(0.8), Hbegf(0.64), Fpr2(0.63), Ccl20(0.55), Saa3(0.5), Vcam1(0.47), Hgf(0.46), Prkcq(0.46), Pdgfb(0.45), Epha2(0.41), Nov(0.34), Vegfa(0.29), Pdgfra(0.27), Pdgfra(0.27), Abcc1(0.24), Ephb1(0.23), Ephb1(0.23), Pdgfrb(0.19), Arrb2(0.19), Dock4(0.18), Agtr1a(0.17), Kit(0.17), Bin2(0.17), Itga1(0.16), Lpar1(0.14), Cxcl12(0.13), Pip5k1a(0.1), Prkcd(0.1), Rhog(0.08), Bcar1…
transcriptional repressor complex	0.00621516	0.212907	3.37979e-08	3.77214e-07	54	0.0248237	0.0206569	0.0115656	0.000788807	0.00421397	Bhlhe41(0.74), Jun(0.69), Gli3(0.43), Rest(0.39), Rest(0.39), Hey2(0.35), Jazf1(0.35), Arid4a(0.35), Skil(0.33), Zbtb16(0.32), Spen(0.31), Coro2a(0.3), Coro2a(0.3), Etv3(0.29), Hdac4(0.27), Mier1(0.26), Ski(0.24), Ncor2(0.23), Tbl1xr1(0.21), Sp3(0.17), Akirin2(0.16), Ncor1(0.14), Ncor1(0.14), Ctbp2(0.12), Zfpm1(0.12), Prdm16(0.12), Rcor1(0.11), Rcor1(0.11), Hdac1(0.09), Tbl1x(0.08), Rbbp8(0.08), …
axon extension	0.00507525	0.326747	3.6222e-08	4.02998e-07	23	0.0700526	0.0522224	0.00479882	0.00123143	0.000443224	Sema7a(0.54), Sema7a(0.54), Sema7a(0.54), Map1b(0.51), Sema5b(0.39), Plxnb1(0.39), Raph1(0.34), Vcl(0.26), Ulk1(0.24), Usp9x(0.22), Usp9x(0.22), Dclk1(0.13), Itgb1(0.11), Itgb1(0.11), Mapt(0.06), Ulk2(0.04), Sema5a(0.03), Ndn(0.02), Cyfip1(0.01), Bdnf(-0.01), Spg11(-0.01), Slc9a6(-0.07), Dvl1(-0.1),
integrin complex	0.00133827	0.369138	3.68568e-08	4.08775e-07	23	0.233471	0.0129438	0.00357467	0.000344592	0.00137118	Itgb3(0.67), Itgav(0.53), Itga5(0.48), Itga2(0.44), Itgam(0.44), Itgb4(0.4), Myh9(0.39), Itga8(0.39), Itga9(0.36), Itga2b(0.31), Itga3(0.3), Itga4(0.27), Itga6(0.24), Itgal(0.24), Itgb2(0.18), Itga1(0.16), Itgb1(0.11), Itgb6(0.08), Itga7(-0.02), Itgb5(-0.04), Itgax(-0.05), Itgb7(-0.16), Itgae(-0.28),
anterior/posterior pattern specification	0.00182969	0.16787	3.82128e-08	4.2249e-07	115	0.7322	0.0036781	2.8684e-05	0.00022056	0.0077317	Arc(0.81), Hoxc11(0.58), Kmt2a(0.53), Kmt2a(0.53), Gli3(0.43), Gli3(0.43), Hipk2(0.42), Ifitm1(0.41), Sfrp2(0.4), Tgfbr1(0.39), Lrp6(0.38), Lrp6(0.38), Bptf(0.37), Apc(0.35), Bmpr2(0.32), Bmpr2(0.32), Hoxc8(0.32), Hoxc8(0.32), Zbtb16(0.32), Hhex(0.31), Hipk1(0.31), Sf3b1(0.29), Rarg(0.27), Rarg(0.27), Celsr1(0.26), Btg2(0.25), Hoxb4(0.25), Acvr2b(0.22), Acvr2b(0.22), Acvr2b(0.22), Crkl(0.21), Hox…
somatic stem cell population maintenance	0.00358955	0.254685	3.88087e-08	4.27742e-07	39	0.0419631	0.0466696	0.000859724	0.0134564	0.000558153	Nog(0.96), Sox4(0.54), Hmga2(0.4), Hmga2(0.4), Apc(0.35), Apc(0.35), Kat6a(0.31), Braf(0.25), Spi1(0.24), Ski(0.24), Tcf7l2(0.23), Tcf7l2(0.23), Ldb2(0.21), Gata2(0.2), Zfp36l2(0.18), Kit(0.17), Klf10(0.16), Vangl2(0.16), Bcl9(0.13), Fgfr3(0.12), Hes1(0.12), Yap1(0.12), Prdm16(0.12), Med15(0.09), Ldb1(0.08), Wnt7a(0.07), Raf1(0.07), Bcl9l(0.06), Lrp5(0.05), Sox9(0.04), Sfrp1(0.02), Tcf7l1(0.01), …
negative regulation of insulin receptor signaling pathway	0.00626493	0.267384	3.94147e-08	4.33072e-07	34	0.00914121	0.00668835	0.0151657	0.0157205	0.00214102	Socs3(0.85), Il1b(0.69), Prkcq(0.46), Irs1(0.4), Socs2(0.36), Kank1(0.25), Tsc1(0.23), Cish(0.22), Socs1(0.22), Rela(0.21), Enpp1(0.2), Trim72(0.2), Nucb2(0.15), Ptpre(0.14), Ptpre(0.14), Ptpn2(0.11), Pid1(0.11), Ankrd26(0.11), Prkcd(0.1), Inpp5k(0.1), Inpp5k(0.1), Ptprf(0.07), Inppl1(0.04), Tsc2(0.03), Rps6kb1(0.02), Prkcb(0.01), Prkcz(0), Ncoa5(-0.01), Grb14(-0.02), Grb10(-0.03), Lmbrd1(-0.04),…
cell leading edge	0.00561067	0.214832	4.08002e-08	4.46907e-07	53	0.00354422	0.0174959	0.00413565	0.0208529	0.00595292	Cxcr4(0.86), Ccdc88a(0.43), Itgb4(0.4), Myh9(0.39), Raph1(0.34), Phldb2(0.34), Slk(0.31), Pxn(0.29), Ndel1(0.29), Clasp2(0.25), Clasp2(0.25), Aak1(0.25), Iqgap1(0.22), Cdc42bpa(0.22), Ldb2(0.21), Abl1(0.19), Atp7a(0.17), Pafah1b1(0.17), Vim(0.16), Coro1a(0.15), Wasl(0.14), Carmil2(0.13), Gbf1(0.11), Dctn1(0.1), Atn1(0.1), Carmil1(0.09), Ldb1(0.08), Jmy(0.06), Actr3(0.06), Ssx2ip(0.06), Lmo4(0.05)…
blood vessel remodeling	0.00253012	0.27209	4.1757e-08	4.55976e-07	38	0.58949	0.00780754	6.47182e-05	0.000357237	0.00492775	Lif(1.22), Chd7(0.59), Angpt2(0.56), Jag1(0.55), Nos3(0.51), Epas1(0.48), Dll4(0.44), Flna(0.42), Tgfbr3(0.33), Bmpr2(0.32), Foxc1(0.32), Vegfa(0.29), Ahr(0.28), Cbs(0.27), Itga4(0.27), Mef2c(0.26), Tgfb2(0.23), Acvr2b(0.22), Adra1b(0.18), Atp7a(0.17), Axl(0.17), Pbrm1(0.16), Igf1(0.12), Igf1(0.12), Acvrl1(0.11), Mdm2(0.07), Nfatc3(0.06), Hoxa3(0.05), Foxc2(0.02), Nol3(-0.01), Rspo3(-0.04), Rbpj(…
thiol-dependent ubiquitin-specific protease activity	0.00498169	0.18217	4.21093e-08	4.58409e-07	87	0.00012279	0.0159599	0.0183466	0.0264747	0.0160253	Tnfaip3(0.54), Tnfaip3(0.54), Zc3h12a(0.46), Usp35(0.35), Usp47(0.29), Usp31(0.26), Zranb1(0.26), Zranb1(0.26), Usp2(0.25), Mysm1(0.25), Otud7b(0.24), Otud7b(0.24), Fam63b(0.23), Usp13(0.22), Yod1(0.21), Uchl1(0.2), Usp42(0.2), Usp42(0.2), Usp11(0.2), Usp33(0.19), Usp33(0.19), Usp34(0.18), Usp12(0.16), Vcpip1(0.15), Cyld(0.15), Cyld(0.15), Usp38(0.15), Usp37(0.14), Otud1(0.13), Otud4(0.13), Tank(…
positive regulation of myoblast differentiation	0.00566867	0.432356	4.22738e-08	4.58787e-07	13	0.0850693	0.0021024	0.0222955	0.0019125	0.00222706	Tnfsf14(1.09), Igfbp3(0.55), Neu2(0.46), Map3k5(0.35), Plcb1(0.27), Mef2c(0.26), Btg1(0.25), Boc(0.25), Pik3r1(0.19), Cdon(0.18), Hif1an(0.15), Nr2c2(0.12), Mapk14(0),
chemorepellent activity	0.00256495	0.336251	4.24329e-08	4.59106e-07	25	0.0498986	0.0847392	0.000105639	0.00352254	0.00526594	Sema3e(0.69), Sema6d(0.65), Sema4c(0.62), Efna5(0.46), Flrt3(0.45), Sema3a(0.42), Sema6b(0.42), Sema3f(0.39), Sema3f(0.39), Sema5b(0.39), Slit2(0.31), Sema3d(0.31), Sema3g(0.3), Sema6a(0.26), Flrt2(0.26), Sema4b(0.22), Sema4g(0.22), Sema5a(0.03), Sema4d(0.01), Epha7(-0.07), Sema4a(-0.07), Sema3b(-0.14), Nrg1(-0.26), Sema3c(-0.46), Apoa1(-0.5),
peptidyl-threonine phosphorylation	0.00675977	0.237083	4.32972e-08	4.67029e-07	43	0.0217807	0.0038761	0.018406	0.0127388	0.00150665	Cdk5r1(0.59), Clk1(0.48), Hipk2(0.42), Tgfbr1(0.39), Myo3b(0.39), Akt3(0.35), Acvr1b(0.29), Acvr1b(0.29), Dyrk1a(0.29), Hk1(0.29), Bcl2(0.24), Tnks(0.23), Lrrk2(0.23), Gsk3b(0.22), Taf1(0.22), Hipk3(0.19), Camk2d(0.15), Camk2d(0.15), Acvr1(0.14), Tgfbr2(0.14), Lmtk2(0.14), Pdpk1(0.1), Prkcd(0.1), Mtor(0.09), Mapk8(0.07), Mapk8(0.07), Grk2(0.04), Map3k12(0.01), Nlk(0), Mapk1(-0.01), Stk39(-0.02), …
negative regulation of endothelial cell migration	0.0052737	0.379857	4.3561e-08	4.68446e-07	17	0.0275172	0.0195501	0.00292328	0.000587937	0.02362	Thbs1(0.72), Stc1(0.69), Vash1(0.57), Dll4(0.44), Ager(0.42), Ptprm(0.38), Slit2(0.31), Serpinf1(0.3), Dab2ip(0.3), Dab2ip(0.3), Dcn(0.27), Krit1(0.18), Acvrl1(0.11), Apoh(0.09), Nr2f2(0.06), Synj2bp(-0.02), Svbp(-0.14),
transforming growth factor beta binding	0.00227348	0.359212	4.60748e-08	4.93977e-07	22	0.116281	0.00920781	0.0028606	0.000548113	0.00900976	Thbs1(0.72), Tgfbr1(0.39), Tgfbr1(0.39), Tgfbr3(0.33), Tgfbr3(0.33), Tgfb3(0.3), Cd109(0.29), Ltbp4(0.26), Vasn(0.26), Vasn(0.26), Eng(0.2), Eng(0.2), Ltbp1(0.19), Acvr1(0.14), Acvr1(0.14), Tgfbr2(0.14), Tgfbr2(0.14), Acvrl1(0.11), Ltbp3(0.05), Agrn(-0.05), Hyal2(-0.27), Cd36(-0.41),
definitive hemopoiesis	0.00278194	0.393051	4.73108e-08	5.05697e-07	17	0.419981	0.0222049	0.00108754	0.000462808	0.000413222	Kmt2a(0.53), Runx1(0.44), Mfap5(0.42), Lyl1(0.38), Tal1(0.35), Bcr(0.35), Tgfbr3(0.33), Hoxb4(0.25), Sp1(0.22), Gata2(0.2), Meis1(0.19), Zfp36l2(0.18), Sp3(0.17), Hoxb3(0.08), Cbfb(0.07), Adar(0.05), Hoxa9(0),
apical part of cell	0.00451983	0.152037	5.14493e-08	5.48276e-07	107	0.0162	0.00139646	0.0355629	0.0478216	0.000484843	Chl1(0.81), C5ar2(0.8), C5ar1(0.63), Itpr3(0.62), Vash1(0.57), Jag1(0.55), Nos3(0.51), Plat(0.51), Adgrf5(0.5), Fat4(0.49), Vcam1(0.47), Acpp(0.44), Tjp1(0.4), Tjp1(0.4), Itga8(0.39), Cdh1(0.38), Emp2(0.38), Shroom3(0.37), Slc4a9(0.37), Slc4a9(0.37), Car2(0.28), Spp1(0.26), Clic4(0.25), Dchs1(0.25), Usp9x(0.22), Dync2h1(0.22), Lrp2(0.21), Msn(0.21), Msn(0.21), Numb(0.21), Numb(0.21), Homer1(0.21)…
cAMP-mediated signaling	0.00464271	0.30541	5.36939e-08	5.70477e-07	26	0.114006	0.00984761	0.000294191	0.00933639	0.00530314	Gal(1.01), Rapgef4(0.63), Adcy1(0.48), Pde3a(0.43), Rapgef2(0.36), Rapgef2(0.36), Adcyap1r1(0.35), Pclo(0.34), Adcy3(0.29), Adcy4(0.28), Pde2a(0.2), Pde2a(0.2), Pde2a(0.2), Adcy9(0.19), Ksr1(0.15), Npr3(0.11), Adcy5(0.1), Adcy6(0.09), Sox9(0.04), Adcy7(0.01), Dgkq(0.01), Slc9a3r1(-0.03), Slc9a3r1(-0.03), Eif4ebp2(-0.04), Ndufs4(-0.1), Rims2(-0.24),
cadherin binding involved in cell-cell adhesion	0.00282445	0.123264	5.87215e-08	6.22026e-07	263	1.69891e-05	0.0680051	0.057262	0.0203874	0.00486066	Hspa1a(1.41), Tmem2(0.63), Eps8l1(0.6), Plec(0.56), Dnajb1(0.56), Ahnak(0.52), Gprc5a(0.51), Cbl(0.48), Flna(0.42), Epha2(0.41), Erc1(0.41), Flnb(0.41), Tjp1(0.4), Dbn1(0.4), Myh9(0.39), Myo1b(0.39), Cdh1(0.38), Evpl(0.38), Fmnl2(0.38), Tln1(0.36), Bag3(0.35), Ddx6(0.34), Phldb2(0.34), Pak6(0.34), Anxa1(0.33), Dock9(0.33), Fam129b(0.33), Notch3(0.32), Slk(0.31), Krt18(0.3), Micall1(0.3), Dab2ip(0…
nuclear speck	0.00511291	0.14685	6.80312e-08	7.1849e-07	112	0.00448691	0.00716626	0.00584036	0.0330399	0.00904505	Aff2(0.83), Malat1(0.57), Malat1(0.57), Ccnl1(0.53), Epas1(0.48), Epas1(0.48), Rbm4(0.44), Gli3(0.43), Nrip1(0.39), Hif1a(0.34), Cdk12(0.33), Ythdc1(0.32), Zbtb16(0.32), Zbtb16(0.32), Hipk1(0.31), Son(0.3), Son(0.3), Dyrk1a(0.29), Zc3h13(0.29), Plcb1(0.27), Plcb1(0.27), Rbm15(0.27), Mef2c(0.26), Wt1(0.25), Wt1(0.25), 1810011O10Rik(0.24), Zcchc12(0.24), Rad54l2(0.24), Cdk13(0.21), Srsf5(0.2), Maml…
fat cell differentiation	0.00533778	0.168442	7.16679e-08	7.54646e-07	86	0.0226101	0.2032	0.0007797	0.000342057	0.00885407	Nr4a3(0.99), Nr4a2(0.91), Rnasel(0.8), Rnasel(0.8), Inhbb(0.79), Ffar4(0.66), Steap4(0.65), Nr4a1(0.58), Lrrc8c(0.55), Lrrc8c(0.55), Arid5b(0.54), Id4(0.51), Adgrf5(0.5), Aloxe3(0.45), Creb5(0.37), Egr2(0.36), Smad6(0.36), Cebpd(0.35), Cebpd(0.35), Ep300(0.33), Lpin1(0.3), Klf4(0.3), Nipbl(0.29), 4932438A13Rik(0.28), Plcb1(0.27), Metrnl(0.25), Eif2ak3(0.24), Grk5(0.23), Pparg(0.23), Pparg(0.23), …
negative regulation of cell differentiation	0.00636102	0.281223	7.31119e-08	7.67566e-07	30	0.0552267	0.0233761	0.0093464	0.00138003	0.00235663	Nog(0.96), P2ry12(0.74), Notch1(0.64), Twist1(0.57), Jag1(0.55), Jag1(0.55), Dll1(0.45), Gli3(0.43), Skil(0.33), Notch3(0.32), Hopx(0.28), Rarg(0.27), Bcl6(0.25), Ski(0.24), Fst(0.18), Fst(0.18), Rara(0.14), Kras(0.13), Hes1(0.12), Itgb1(0.11), Ctnnb1(0.03), Hmgb3(0.03), Mapk1(-0.01), Suz12(-0.02), Rbpj(-0.05), Gdf11(-0.12), Elf5(-0.24), Wnt4(-0.5), Prmt5(-0.5), Ihh(-0.51),
feeding behavior	0.00519822	0.394043	7.40041e-08	7.74634e-07	16	0.174383	0.0156691	8.39231e-05	0.00812269	0.00630803	Gal(1.01), Ntrk2(0.94), Drd1(0.69), Htr1b(0.65), Cckar(0.56), Cckar(0.56), Apln(0.48), Npy(0.48), Stra6(0.37), Calca(0.17), Negr1(0.15), Hcrtr1(0.12), Npy1r(0.04), Bdnf(-0.01), Gigyf2(-0.01), Adm2(-1.51),
negative chemotaxis	0.00216264	0.338145	7.4429e-08	7.76784e-07	26	0.276912	0.0269638	0.000120101	0.000971657	0.00699499	Sema3e(0.69), Itgb3(0.67), Sema4c(0.62), Slit3(0.56), Itgav(0.53), Sema3a(0.42), Sema3f(0.39), Sema3f(0.39), Nrp2(0.38), Nrp2(0.38), Slit2(0.31), Slit2(0.31), Sema3d(0.31), Sema3g(0.3), Pdgfa(0.28), Sema4b(0.22), Sema4g(0.22), Sema4d(0.01), Rhoa(-0.05), Sema4a(-0.07), Ryk(-0.12), Sema3b(-0.14), Plxna3(-0.18), Wnt5a(-0.3), Sema3c(-0.46), Apoa1(-0.5),
arachidonic acid metabolic process	0.00473731	0.290483	7.74656e-08	8.06098e-07	30	0.000843615	0.00575417	0.00152636	0.0952259	0.0364968	Sstr4(0.71), Cyp2d12(0.63), Alox5(0.53), Cyp4f18(0.47), Aloxe3(0.45), Aloxe3(0.45), Alox12(0.42), Alox12(0.42), Alox12(0.42), Cyp2d9(0.35), Pla2g4a(0.27), Cyp1b1(0.24), Cyp1b1(0.24), Cyp2d26(0.24), Mgll(0.19), Dagla(0.19), Dagla(0.19), Cyp2j13(0.14), Cyp2j9(0.12), Cyp2j11(0.11), Cyp2j6(0.09), Cyp2j6(0.09), Cyp2d22(0.06), Cyp2d22(0.06), Cyp2j5(-0.01), Fads1(-0.05), Pnpla8(-0.06), Cyp4f14(-0.29), D…
cellular response to hormone stimulus	0.00635869	0.373071	7.91172e-08	8.2051e-07	17	0.00476411	0.00834589	0.00117342	0.0311488	0.0335845	Jun(0.69), Ncf2(0.52), Junb(0.5), Socs2(0.36), Sik1(0.28), Ncoa3(0.24), Avpr1a(0.24), Ncoa2(0.22), Oxtr(0.22), Jund(0.21), Stat3(0.21), Ncoa1(0.13), Hcrtr1(0.12), Inpp5k(0.1), Stat5b(0.07), Adra2a(-0.03), Ghr(-0.09),
ventricular septum development	0.00613922	0.264061	7.93144e-08	8.2051e-07	34	0.0450395	0.0216326	0.00119828	0.00667349	0.00629024	Cxcr4(0.86), Prdm1(0.57), Luzp1(0.46), Heg1(0.43), Hectd1(0.43), Stra6(0.37), Smad6(0.36), Cntrl(0.36), Gja5(0.34), Ptk7(0.34), Robo1(0.28), Cited2(0.27), Cyr61(0.26), Mdm4(0.24), 2410089E03Rik(0.22), Lrp2(0.21), Pde2a(0.2), Trip11(0.19), Ltbp1(0.19), Gata3(0.18), Hes1(0.12), Frs2(0.1), Mdm2(0.07), Dnm2(0.05), Lmo4(0.05), Sufu(0.05), Ap2b1(0.05), Matr3(-0.04), Smarca4(-0.04), Sall1(-0.04), Sall1(…
negative regulation of axon extension	0.00614389	0.328256	8.27693e-08	8.53755e-07	22	0.222032	0.00612609	0.0076753	0.00292207	0.000569191	Aatk(0.62), Aatk(0.62), Cdk5r1(0.59), Sema3a(0.42), Sema3a(0.42), Sema3a(0.42), Ifrd1(0.32), Slit2(0.31), Rtn4(0.25), Rtn4(0.25), Rtn4(0.25), Cdkl3(0.25), Cdkl3(0.25), Arhgap4(0.19), Actr3(0.06), Rnf6(0.06), Rnf6(0.06), Ccr5(0.04), Cdk5(-0.09), Nrp1(-0.19), Ntn1(-0.3), Rtn4r(-0.34),
positive regulation of osteoclast differentiation	0.00465238	0.346094	8.33141e-08	8.56876e-07	20	0.0139592	0.0106033	0.00196217	0.142814	0.00058301	Fos(0.83), Itgb3(0.67), Ccr1(0.6), Car2(0.28), Notch2(0.28), Csf1(0.24), Csf1(0.24), Csf1(0.24), Csf1(0.24), Creb1(0.19), Gnas(0.19), Klf10(0.16), Ocstamp(0.16), Csf1r(0.12), Traf6(0.11), Tmem64(0.04), Asxl2(-0.04), Tnf(-0.19), Ppargc1b(-0.25), Ccl5(-0.34),
liver development	0.00643962	0.19532	8.37462e-08	8.58824e-07	62	0.0112109	0.0164954	0.00121526	0.013683	0.020372	Jun(0.69), Notch1(0.64), Meg3(0.59), Hgf(0.46), Runx1(0.44), Hlx(0.44), Gata6(0.43), Smad3(0.4), Tgfbr3(0.33), Hhex(0.31), Pkd2(0.3), Nf1(0.29), Ahr(0.28), Notch2(0.28), Pik3ca(0.28), Cited2(0.27), Upf2(0.27), Hp(0.26), Foxm1(0.25), Pkm(0.25), Pkd1(0.25), Mkl2(0.25), Ada(0.24), Man2a1(0.22), Sp1(0.22), Rela(0.21), Rb1cc1(0.2), Aacs(0.19), Sp3(0.17), Sec63(0.17), Sec63(0.17), Jarid2(0.16), Igf2r(0…
eyelid development in camera-type eye	0.00766733	0.408174	9.05399e-08	9.2581e-07	14	0.0402941	0.0104646	0.0159655	0.0157864	0.000457037	Inhba(1.17), Jun(0.69), Sox11(0.57), Twist1(0.57), Tfap2a(0.49), Stra6(0.37), Osr2(0.36), Kmt2c(0.31), Egfr(0.25), Map3k1(0.2), Srf(0.16), Hdac1(0.09), Sos1(0.04), Hdac2(-0.09),
excitatory synapse	0.00495486	0.315603	9.12452e-08	9.30333e-07	25	0.0776816	0.0145789	0.00159892	0.0102899	0.00256901	Ntrk2(0.94), Stx1b(0.69), Pde4b(0.68), Rapgef4(0.63), Shank3(0.61), Bsn(0.54), Elfn1(0.48), Dbn1(0.4), Slc17a8(0.36), Fgfr2(0.32), Itga3(0.3), Unc13a(0.23), Homer1(0.21), Syt11(0.15), Dlg4(0.1), Dlg4(0.1), Met(0.1), Syp(0.09), Syp(0.09), Ptprf(0.07), Actr3(0.06), Nlgn2(-0.03), Nlgn2(-0.03), Srpx2(-0.29), Shank1(-0.53),
endothelial cell migration	0.00512844	0.326649	9.5565e-08	9.71577e-07	24	0.0640721	0.0302624	0.00280784	0.00300553	0.0031676	Itgav(0.53), Nos3(0.51), Tgfbr1(0.39), Plxnd1(0.32), Cdh13(0.3), Prkx(0.29), Vegfa(0.29), Stard13(0.29), Pecam1(0.26), Pecam1(0.26), Cyp1b1(0.24), Loxl2(0.24), Itgb2(0.18), Ptp4a3(0.18), Ptp4a3(0.18), Plekhg5(0.12), Adgra2(0.07), Pten(0.02), Dpp4(0), Rhoa(-0.05), Ptk2(-0.06), Paxip1(-0.14), Gipc1(-0.17), Grem1(-0.47),
outflow tract morphogenesis	0.00223523	0.27119	9.72965e-08	9.86347e-07	38	0.24772	0.0123564	0.000602016	0.00238505	0.00402665	Ryr1(0.74), Thbs1(0.72), Jun(0.69), Wnt11(0.6), Sox11(0.57), Tfap2a(0.49), Hey1(0.43), Sfrp2(0.4), Hey2(0.35), Tbx3(0.35), Gja5(0.34), Hif1a(0.34), Plxnd1(0.32), Heyl(0.29), Nipbl(0.29), Cited2(0.27), Mef2c(0.26), Tgfb2(0.23), Sox17(0.22), Fzd2(0.22), Sec24b(0.17), Tgfbr2(0.14), Hes1(0.12), Zfpm1(0.12), Zfpm2(0.12), Fzd1(0.09), Dvl2(0.06), Atf2(0.04), Npy1r(0.04), Dhrs3(0.04), Tbx2(0.04), Bmp4(0.…
apicolateral plasma membrane	0.00718015	0.382044	9.76637e-08	9.8724e-07	16	0.00724049	0.0483806	0.00444845	0.0112951	0.0042225	Thbd(0.8), Cldn6(0.72), Cldn4(0.69), Cldn4(0.69), Prickle2(0.54), Cldn5(0.49), Cldn7(0.43), Tjp1(0.4), Cxadr(0.21), Jup(0.19), Ocln(0.17), Mpdz(0.16), Cldn3(0.07), Fzd6(0), Palm(-0.22), Cldn8(-0.34),
epidermal growth factor receptor binding	0.00659822	0.265759	1.13294e-07	1.14198e-06	33	0.00340453	0.0341172	0.030923	0.00060653	0.0261052	Ereg(0.79), Hbegf(0.64), Hbegf(0.64), Egf(0.56), Egf(0.56), Cd44(0.49), Itga5(0.48), Socs5(0.44), Areg(0.37), Areg(0.37), Pigr(0.35), Tgfa(0.3), Tgfa(0.3), Fam83b(0.28), Erbb4(0.25), Btc(0.16), Btc(0.16), Shc1(0.16), Tnk2(0.12), Plscr1(0.11), Vav3(0.11), Atxn2(0.09), Snx4(0.08), Fer(0.07), Vav2(0.05), Grb2(0.03), Efemp1(-0.01), Yes1(-0.03), Snx1(-0.04), Arf4(-0.07), Cblc(-0.08), Snx2(-0.12), Rnf1…
negative regulation of apoptotic process	0.00460813	0.0726247	1.17463e-07	1.18064e-06	462	0.00559441	0.00759304	0.0154213	0.0217413	0.0078419	Hspa1b(1.37), Il6(1.24), Cxcr2(1.09), Cxcr2(1.09), Nr4a3(0.99), Socs3(0.85), Thbs1(0.72), Plk2(0.7), Jun(0.69), Sycp2(0.68), Pgr(0.66), Ffar4(0.66), Pim1(0.63), Pim1(0.63), Il1rn(0.62), Wnt11(0.6), Mmp9(0.59), Plk3(0.58), Insl3(0.57), Dusp1(0.57), Twist1(0.57), Twist1(0.57), Egr3(0.54), Amigo2(0.53), Cd38(0.52), Sycp3(0.52), Kdr(0.51), Ednrb(0.5), Cd44(0.49), Tfap2a(0.49), Cbl(0.48), Ednra(0.48),…
ATG1/ULK1 kinase complex	0.0063039	0.47219	1.18362e-07	1.1863e-06	11	0.00378471	0.00773204	0.00605193	0.0904198	0.00444174	Ulk1(0.24), Ulk1(0.24), Ulk1(0.24), Rb1cc1(0.2), Rb1cc1(0.2), Rb1cc1(0.2), Atg13(0.08), Atg13(0.08), Atg13(0.08), Sesn2(0.05), Tbc1d5(-0.19),
cellular response to cytokine stimulus	0.00476822	0.302989	1.24417e-07	1.24346e-06	27	0.0536374	0.00669415	0.00281001	0.017546	0.00501728	Nlrp12(1.12), Cxcr4(0.86), Cxcr4(0.86), Csf3(0.76), Foxf1(0.56), Nos2(0.45), Akap6(0.44), Hcls1(0.4), Nfkbia(0.33), Jak3(0.29), Flt3(0.26), Flt3(0.26), Socs1(0.22), Nfkb1(0.21), Stat3(0.21), Gata3(0.18), Il17ra(0.13), Csf1r(0.12), Plscr1(0.11), Pid1(0.11), Stat5a(0.1), Mme(0.09), Cdk9(0.04), Hax1(-0.2), Ccr7(-0.23), Ddias(-0.24), Stat1(-0.26),
vinculin binding	0.00583512	0.428214	1.2997e-07	1.29531e-06	13	0.0761018	0.00447437	0.00808621	0.00420549	0.00753438	Nrap(0.51), Utrn(0.5), Dlc1(0.46), Synm(0.41), Tln1(0.36), Pxn(0.29), Ctnna1(0.25), Actn1(0.24), Actn1(0.24), Dag1(0.1), Sorbs3(0.08), Dmd(0.06), Rtcb(-0.25),
positive regulation of actin filament polymerization	0.0037181	0.22274	1.34155e-07	1.33326e-06	49	0.0373844	0.0101795	0.0340242	0.00788891	0.000780529	Ccl11(0.83), Csf3(0.76), Cdc42ep4(0.43), Cdc42ep3(0.43), Nphs1(0.41), Kirrel(0.39), Rictor(0.31), Gm14137(0.27), Nck2(0.24), Cdc42ep2(0.23), Cdc42ep2(0.23), Map3k1(0.2), Bag4(0.16), Nckap1l(0.16), Nckap1l(0.16), Baiap2(0.16), Evl(0.14), Cdc42ep5(0.14), Cdc42ep5(0.14), Ptk2b(0.12), Vasp(0.12), Cdc42ep1(0.12), Myo1c(0.11), Mtor(0.09), Mtor(0.09), Carmil1(0.09), Fer(0.07), Dlg1(0.06), Rac1(0.06), Ac…
ruffle membrane	0.0077917	0.211387	1.39284e-07	1.38036e-06	54	0.0123545	0.0576347	0.0059374	0.00665221	0.00373258	Bmx(0.67), Itgb3(0.67), Plek(0.65), Eps8l1(0.6), Itgav(0.53), Itga5(0.48), Dlc1(0.46), Ptprj(0.43), Fgr(0.36), Apc(0.35), Cdkl5(0.32), Tiam1(0.31), Ppp1r9b(0.27), Src(0.26), Clasp2(0.25), Kank1(0.25), Hsp90aa1(0.24), Tirap(0.21), Abca7(0.2), Myo6(0.19), Spata13(0.19), Diaph1(0.18), Synj2(0.18), Arhgef2(0.12), Itgb1(0.11), Myo1c(0.11), Pip5k1a(0.1), Pip5k1a(0.1), Inpp5k(0.1), Pacsin1(0.1), Adam17(…
positive regulation of bone resorption	0.00388054	0.380528	1.48589e-07	1.46845e-06	18	0.157828	0.0308098	0.00192001	0.00383977	0.0012185	Adam8(0.71), Adam8(0.71), Itgb3(0.67), Itgb3(0.67), Syk(0.63), Trf(0.61), Ptger4(0.55), Lrp6(0.38), Car2(0.28), Spp1(0.26), Spp1(0.26), Egfr(0.25), Dcstamp(0.1), Ltbp3(0.05), Tmem64(0.04), Atp6ap1(-0.09), Ppargc1b(-0.25), Tfrc(-0.36),
mRNA 3'-UTR AU-rich region binding	0.00868666	0.419331	1.50142e-07	1.47967e-06	13	0.0112874	0.00978785	0.0056902	0.0535924	0.00347465	Zc3h12a(0.46), Zfp36(0.37), Zfp36(0.37), Zfp36l1(0.32), Zfp36l1(0.32), Cpeb2(0.31), Cpeb3(0.2), Zfp36l2(0.18), Zfp36l2(0.18), Elavl1(0.15), Hnrnpd(0.03), Cpsf1(-0.02), Cpeb1(-0.24),
interleukin-6-mediated signaling pathway	0.0102846	0.453494	1.52235e-07	1.49613e-06	11	0.0269941	0.00812801	0.0125888	0.00628829	0.00851897	Il6(1.24), Il6(1.24), Il6ra(0.54), Il6ra(0.54), Zcchc11(0.31), Il6st(0.21), Stat3(0.21), Gab1(0.17), Fer(0.07), Smad4(0.05), Ctr9(-0.07),
hormone activity	0.0033855	0.292977	1.56173e-07	1.53058e-06	35	0.150886	0.164753	5.61849e-05	0.000100962	0.0319543	Nppb(1.3), Retnlg(1.28), Inhba(1.17), Gal(1.01), Inhbb(0.79), Stc1(0.69), Insl3(0.57), Edn1(0.53), Apln(0.48), Npy(0.48), Fam132b(0.4), Fbn1(0.3), Metrnl(0.25), Calca(0.17), Igf2(0.16), Ucn2(0.16), Igf1(0.12), Edn3(0.07), Copa(0.06), Ttr(-0.01), Cck(-0.04), Fndc5(-0.07), Angptl8(-0.14), Adm(-0.15), Tor2a(-0.28), Retn(-0.28), Thpo(-0.29), Fam132a(-0.29), Insl6(-0.35), Stc2(-0.61), Agt(-0.75), Adip…
CXCR chemokine receptor binding	0.0061767	0.479214	1.59971e-07	1.5612e-06	10	0.00994153	0.0204598	0.019242	0.00258425	0.01425	Cxcl5(1.3), Cxcl3(1.29), Ppbp(1.22), Pf4(0.71), Cxcl2(0.62), Cxcl10(0.39), Cxcl12(0.13), Cxcl12(0.13), Cxcl1(0.12), Itch(0.04),
actin filament organization	0.00361085	0.194946	1.6018e-07	1.5612e-06	69	0.00959368	0.0796081	0.00700395	0.00609674	0.00330844	Ccl11(0.83), Avil(0.76), Rnd1(0.62), Trf(0.61), Casp4(0.43), Dbn1(0.4), Myo1b(0.39), Emp2(0.38), Abl2(0.3), Ppp1r9b(0.27), Ctnna1(0.25), Shroom4(0.25), Bcl2(0.24), Nck2(0.24), Actn1(0.24), Mtss1(0.23), Rac2(0.22), Was(0.22), Akap2(0.21), Diaph2(0.21), Fat1(0.19), Pdlim3(0.19), Sorbs2(0.19), Diaph1(0.18), Tmod3(0.17), Whamm(0.17), Tmsb4x(0.16), Srf(0.16), Tmod1(0.16), Coro1a(0.15), Wasl(0.14), Fsc…
embryonic cranial skeleton morphogenesis	0.00332683	0.3037	1.63192e-07	1.58619e-06	29	0.174728	0.0186894	0.0010937	0.00070584	0.0158661	Wnt9b(1), Twist1(0.57), Twist1(0.57), Twist1(0.57), Tfap2a(0.49), Mmp14(0.45), Smad3(0.4), Tgfbr1(0.39), Setd2(0.37), Fgfr2(0.32), Runx2(0.29), Nipbl(0.29), Grhl2(0.29), Pdgfra(0.27), Six4(0.22), Gnas(0.19), Tgfbr2(0.14), Foxc2(0.02), Bmp4(0.01), Wdr19(0), Prrx1(-0.02), Prrx1(-0.02), Gas1(-0.03), Gas1(-0.03), Smad2(-0.03), Slc39a1(-0.07), Slc39a1(-0.07), Slc39a3(-0.07), Eif4a3(-0.14),
Golgi membrane	0.00967768	0.137798	1.71165e-07	1.65913e-06	120	0.046639	0.012474	0.00422966	0.00614229	0.00956381	B3galt1(0.56), Srgn(0.55), Glipr2(0.5), Chst1(0.48), Chst2(0.43), Mall(0.43), Xylt1(0.43), Hpd(0.39), Cabp1(0.35), 1190002N15Rik(0.31), Mapk8ip3(0.3), Stk26(0.28), Pmepa1(0.24), Glg1(0.23), Acbd3(0.23), Man2a1(0.22), Man2a2(0.21), Rgp1(0.19), Stx5a(0.18), Stx5a(0.18), Golga3(0.18), Man1c1(0.17), Whamm(0.17), Cav1(0.16), Plekhb1(0.14), Wasl(0.14), Hace1(0.14), Chst3(0.13), Usf3(0.13), Stk25(0.12),…
negative regulation of cysteine-type endopeptidase activity involved in apoptotic process	0.00813216	0.200151	1.79694e-07	1.7364e-06	57	0.0027823	0.00615792	0.00616498	0.0616154	0.0196633	Hspa1b(1.37), Il6(1.24), Thbs1(0.72), Nr4a1(0.58), Cd44(0.49), Hgf(0.46), Cflar(0.45), Sfrp2(0.4), Ep300(0.33), Klf4(0.3), Vegfa(0.29), Usp47(0.29), Usp47(0.29), Rps6ka3(0.27), Cdkn2d(0.26), Ddx3x(0.26), Src(0.26), Sh3rf1(0.26), Wnt9a(0.21), Naip2(0.2), Mical1(0.2), Adora2a(0.19), Arrb2(0.19), Xiap(0.18), Xiap(0.18), Herpud1(0.17), Arrb1(0.17), Igf1(0.12), Mkl1(0.11), Siah2(0.1), Aqp1(0.08), Por(…
positive regulation of phosphatidylinositol 3-kinase activity	0.00765393	0.314722	1.80118e-07	1.7364e-06	23	0.0469677	0.0152963	0.0105008	0.00672795	0.00287007	Flt1(0.5), Pdgfb(0.45), Irs1(0.4), Irs1(0.4), Nod2(0.4), Fgr(0.36), Fgf2(0.31), Tgfb1(0.28), Pdgfra(0.27), Src(0.26), Atg14(0.21), Pdgfrb(0.19), Fgfr3(0.12), Ptk2b(0.12), Lyn(0.11), Vav3(0.11), Ambra1(0.08), Rac1(0.06), Vav2(0.05), Pik3r4(0.02), Sh3glb1(0.01), Cdc42(-0.06), Tek(-0.09),
regulation of angiogenesis	0.00932562	0.288535	1.95235e-07	1.87701e-06	27	0.0061014	0.016232	0.0231095	0.0190972	0.00422216	Prok1(0.74), Vash2(0.64), Vash1(0.57), Angpt2(0.56), Serpine1(0.52), Itga5(0.48), Epha2(0.41), Ets1(0.41), Emp2(0.38), Adora2b(0.32), Id1(0.32), Plxnd1(0.32), Nf1(0.29), Nf1(0.29), Tspan12(0.23), Efna1(0.18), Mapk7(0.18), Ptk2b(0.12), Adgra2(0.07), Tnfrsf12a(-0.07), Enpp2(-0.08), Tek(-0.09), Egln1(-0.11), Rnh1(-0.13), Wars(-0.28), Htatip2(-0.4), Htatip2(-0.4),
leukocyte chemotaxis	0.00453016	0.431308	1.96582e-07	1.88484e-06	15	0.0151567	0.0184853	0.142729	0.00761042	0.000162451	S100a9(0.76), Pf4(0.71), Cxcl2(0.62), Ccr1(0.6), Ccr1(0.6), S1pr1(0.59), Lyst(0.44), Cnr2(0.38), Ccl4(0.18), Sbds(0.16), Coro1a(0.15), Il16(0.14), Cklf(0.01), Gpr183(-0.11), Gpr183(-0.11),
cellular response to tumor necrosis factor	0.00563948	0.196807	1.99436e-07	1.90704e-06	61	0.0909291	0.0101794	0.0427808	0.00290172	0.000679931	Il6(1.24), Acod1(1.12), Ccl11(0.83), Ccl6(0.82), Ccl7(0.56), Ccl20(0.55), Fabp4(0.48), Zc3h12a(0.46), Dbn1(0.4), Sirt1(0.4), Ankrd1(0.4), Zfp36(0.37), Zfp36(0.37), Birc3(0.35), Rora(0.33), Zfp36l1(0.32), Dab2ip(0.3), Dab2ip(0.3), Adamts7(0.3), Ccl2(0.27), Nfkb1(0.21), Rela(0.21), Erbin(0.21), Nfe2l2(0.19), Zfp36l2(0.18), Ccl4(0.18), Adamts12(0.18), Irf1(0.17), Bag4(0.16), Ocstamp(0.16), Prpf8(0.1…
positive regulation of ossification	0.00595701	0.374335	2.09138e-07	1.99442e-06	17	0.199385	0.00431289	0.000101317	0.0350819	0.0102089	Sox11(0.57), Sox11(0.57), Ptger4(0.55), Lrp6(0.38), Bmp2(0.34), Bmp2(0.34), P2rx7(0.32), Zbtb16(0.32), Runx2(0.29), Nipbl(0.29), Tac1(0.22), Calca(0.17), Tob2(0.15), Bmp4(0.01), Bmp4(0.01), Thrb(-0.11), Wnt5a(-0.3),
cellular response to interleukin-1	0.00511835	0.248321	2.13565e-07	2.03117e-06	40	0.0184942	0.0204824	0.0376537	0.0233782	0.000325171	Il6(1.24), Acod1(1.12), Ccl11(0.83), Ccl6(0.82), Ccl7(0.56), Ccl20(0.55), Serpine1(0.52), Saa3(0.5), Zc3h12a(0.46), Fn1(0.4), Ankrd1(0.4), Rora(0.33), Rc3h1(0.33), Dab2ip(0.3), Dab2ip(0.3), Adamts7(0.3), Ccl2(0.27), Nfkb1(0.21), Rela(0.21), Ccl4(0.18), Adamts12(0.18), Irf1(0.17), Hyal1(0.12), Tank(0.12), Cebpb(0.1), Cactin(0.07), Hyal3(0.07), Yy1(0.06), Upf1(0.04), Rbmx(0.03), Ccl9(0.03), Mylk3(0…
positive regulation of endothelial cell migration	0.00649421	0.231518	2.24399e-07	2.12849e-06	44	0.246764	0.00607985	0.00427833	0.00325908	0.00303971	Thbs1(0.72), Itgb3(0.67), Kdr(0.51), Kdr(0.51), Zc3h12a(0.46), Fgf1(0.45), Alox12(0.42), Ets1(0.41), Flt4(0.38), Prox1(0.36), Rock2(0.34), Bmpr2(0.32), Fgf2(0.31), Ccbe1(0.31), Vegfa(0.29), Prkd2(0.29), Angpt1(0.25), Angpt1(0.25), Gata3(0.18), Prkd1(0.18), Ptk2b(0.12), Ptk2b(0.12), Angpt4(0.11), Sash1(0.11), Anxa3(0.1), Sparc(0.09), Wnt7a(0.07), Adgra2(0.07), Bcar1(0.03), Bcas3(0.03), Foxc2(0.02)…
sprouting angiogenesis	0.00570529	0.318459	2.2516e-07	2.12999e-06	25	0.167091	0.059839	0.000934933	0.00184034	0.00300096	E2f7(0.85), E2f7(0.85), Thbs1(0.72), Pgf(0.69), Sema3e(0.69), Notch1(0.64), Esm1(0.51), Flt1(0.5), Flt4(0.38), Nrarp(0.37), Nrarp(0.37), Cdh13(0.3), Angpt1(0.25), Loxl2(0.24), Jmjd6(0.17), Ptk2b(0.12), Adgra2(0.07), Parva(0), Ramp2(-0.04), Rspo3(-0.04), Rnf213(-0.05), Cdc42(-0.06), Tek(-0.09), Nrp1(-0.19), Otulin(-0.22),
dendrite morphogenesis	0.00755275	0.23571	2.28111e-07	2.15215e-06	42	0.239121	0.00574137	0.00347003	0.00673887	0.00204561	Klf7(0.64), Sema3a(0.42), Dact1(0.4), Dact1(0.4), Fyn(0.37), Rock2(0.34), Farp1(0.33), Prex2(0.31), Abl2(0.3), Abl2(0.3), Mef2a(0.26), Picalm(0.24), Picalm(0.24), Rbfox2(0.22), Btbd3(0.2), Atp7a(0.17), Dclk1(0.13), Rere(0.12), Itgb1(0.11), Itgb1(0.11), Celsr2(0.09), Kidins220(0.08), Mapk8(0.07), Rac1(0.06), Map6(0.04), Map6(0.04), Abi1(0.03), Cacna1a(0.03), Slc11a2(0.03), Mink1(0.03), Lrp8(0), Vl…
negative regulation of MAP kinase activity	0.00540481	0.237632	2.35291e-07	2.21398e-06	43	0.0121782	0.0115958	0.017563	0.0117072	0.00889566	Il1b(0.69), Spry4(0.66), Dusp1(0.57), Rgs2(0.51), Spry2(0.44), Ptprj(0.43), Ptprj(0.43), Irak3(0.4), Irak3(0.4), Sorl1(0.36), Dusp7(0.36), Cd300a(0.34), Dab2ip(0.3), Nf1(0.29), Nf1(0.29), Gsk3b(0.22), Uchl1(0.2), Ptpn1(0.19), Mapk7(0.18), Cav1(0.16), Spry1(0.16), Hmgcr(0.15), Apoe(0.11), Lyn(0.11), Prkcd(0.1), Inpp5k(0.1), Bmp7(0.07), Stk38(0.06), Inppl1(0.04), Tsc2(0.03), Rgs14(0.02), Bmp4(0.01)…
digestive tract development	0.00446298	0.322199	2.36691e-07	2.22125e-06	24	0.204851	0.00744099	0.00121103	0.00418533	0.00981583	Gata5(0.71), Foxf1(0.56), Clmp(0.56), Fat4(0.49), Gata6(0.43), Itgb4(0.4), Myocd(0.37), Fgfr2(0.32), Pdgfa(0.28), Pdgfa(0.28), Col3a1(0.27), Dchs1(0.25), Itga6(0.24), Gata2(0.2), Gata3(0.18), Kit(0.17), Dicer1(0.16), Rb1(0.15), Chd8(0.14), Cobl(0.03), Pdgfc(0.03), Trps1(0.02), Lgr4(-0.08), Smo(-0.26),
lung vasculature development	0.00694934	0.455559	2.3998e-07	2.24617e-06	11	0.153803	0.0345998	9.35433e-05	0.0114749	0.00799311	Lif(1.22), Foxf1(0.56), Errfi1(0.39), Stra6(0.37), Id1(0.32), Vegfa(0.29), Vegfa(0.29), Tcf21(0.22), Igf1(0.12), Igf1(0.12), Ift88(-0.05),
gamma-catenin binding	0.00966602	0.473441	2.42831e-07	2.26685e-06	10	0.0160556	0.0847131	0.00291003	0.00945633	0.00427449	Ptprj(0.43), Cdh1(0.38), Apc(0.35), Apc(0.35), Apc2(0.34), Ctnna1(0.25), Tcf7l2(0.23), Cdh2(0.15), Fer(0.07), Ptprk(0.05),
retinoic acid receptor binding	0.00866872	0.319574	2.48914e-07	2.31752e-06	22	0.0010661	0.0187001	0.0189813	0.106364	0.00282745	Nrip1(0.39), Nsd1(0.24), Asxl1(0.24), Ncor2(0.23), Ncoa2(0.22), Actn4(0.16), Hmga1-rs1(0.15), Ncor1(0.14), Ncor1(0.14), Ncoa1(0.13), Lrif1(0.13), Ctbp2(0.12), Cnot1(0.09), Rxra(0.07), Med1(0.05), Med1(0.05), Prmt2(-0.01), Snw1(-0.04), Med25(-0.04), Med25(-0.04), Hmga1(-0.07), Rxrb(-0.12),
hemopoiesis	0.00716497	0.187334	2.55232e-07	2.3701e-06	66	0.203984	0.0383549	0.00671356	0.0022142	0.000458935	Add2(0.83), Angpt2(0.56), Kdr(0.51), Epas1(0.48), Runx1(0.44), Runx1(0.44), Tiparp(0.39), Tal1(0.35), Sh2b3(0.33), Sptb(0.32), Tet2(0.32), Zbtb16(0.32), Zbtb16(0.32), Hhex(0.31), Myo1e(0.3), Runx3(0.27), Flt3(0.26), Angpt1(0.25), Hoxb4(0.25), Bcl2(0.24), Mknk2(0.24), Picalm(0.24), Tgfb2(0.23), Flcn(0.22), Cdk13(0.21), Gata2(0.2), Hbb-b1(0.2), Shb(0.2), Meis1(0.19), Zfp36l2(0.18), Kit(0.17), Zfp95…
hemidesmosome	0.00813498	0.475476	2.58432e-07	2.39354e-06	10	0.0590498	0.040998	0.00421587	0.00325071	0.00512495	Col17a1(0.66), Plec(0.56), Dst(0.46), Itgb4(0.4), Itgb4(0.4), Lama3(0.34), Itga6(0.24), Erbin(0.21), Itgb1(0.11), Actr3(0.06),
decidualization	0.00936028	0.398187	2.60899e-07	2.41008e-06	14	0.0297816	0.0448568	0.0135657	0.00638896	0.0016389	Lif(1.22), Lif(1.22), Ptgs2(1.16), Ptgs2(1.16), Junb(0.5), Cdh1(0.38), Cited2(0.27), Pla2g4a(0.27), Epor(0.16), Ctsl(0.13), Il11ra1(0.12), Dedd(0.1), Ptgis(-0.07), Ctsb(-0.13),
transcription factor activity, transcription factor binding	0.0082112	0.398836	2.74061e-07	2.52507e-06	14	0.0781875	0.0170052	0.00255906	0.00195814	0.0239621	Nab2(0.54), Per1(0.45), Cry2(0.44), Hif1a(0.34), Trp63(0.27), Mlxip(0.26), Foxo1(0.25), Arnt(0.22), Ldb2(0.21), Per2(0.21), Nab1(0.12), Ldb1(0.08), Mta2(0.07), Cry1(-0.08),
positive regulation of cell-cell adhesion	0.00501208	0.372049	2.94451e-07	2.70589e-06	18	0.198943	0.0392527	0.00325583	0.00645547	0.000394137	Smad7(0.41), Smad7(0.41), Cdh1(0.38), Cd47(0.35), Cd24a(0.34), Mex3b(0.33), Cited2(0.27), Ccl2(0.27), Myo10(0.25), Itga6(0.24), Itgal(0.24), Kif26b(0.17), Kif26b(0.17), L1cam(0.12), Ccr5(0.04), Fstl3(0), Rap1gap(0), Wnt5a(-0.3),
negative regulation of JAK-STAT cascade	0.00790011	0.252094	3.01917e-07	2.76731e-06	35	0.00888381	0.0262764	0.00863787	0.00171173	0.061628	Socs3(0.85), Socs3(0.85), Nyx(0.46), Flrt3(0.45), Socs5(0.44), Hmga2(0.4), Rtn4rl2(0.38), Socs2(0.36), Dcn(0.27), Flrt2(0.26), Ptprd(0.25), Cish(0.22), Socs1(0.22), Socs1(0.22), Leprot(0.19), Leprot(0.19), Socs7(0.18), Flrt1(0.18), Cav1(0.16), Cav1(0.16), Cav1(0.16), Socs6(0.16), Socs4(0.16), Podn(0.16), Lrrc66(0.12), Bgn(0.11), Adipor1(0.01), Nf2(-0.04), Hgs(-0.06), Rtn4rl1(-0.08), Rtn4r(-0.34),…
sarcoplasmic reticulum	0.00531718	0.208556	3.04875e-07	2.78721e-06	57	0.420503	0.00205477	0.00052531	0.0294663	0.0017603	Atp2a1(0.84), Atp2a1(0.84), Rasd1(0.75), Ryr1(0.74), Ryr1(0.74), Ank1(0.73), Thbs1(0.72), Itpr3(0.62), Cacna2d1(0.55), Akap6(0.44), Akap6(0.44), Syne2(0.36), Thbs4(0.35), Jph2(0.35), Jph2(0.35), Jph1(0.32), Jph1(0.32), Cacnb1(0.26), Itpr2(0.26), Itpr2(0.26), Pygm(0.21), Stim1(0.19), Xdh(0.16), Camk2d(0.15), Atp2a2(0.14), Atp2a2(0.14), Atp2a2(0.14), Calu(0.12), Camk2b(0.12), Atp2a3(0.1), Camk2g(0.…
dendrite development	0.0108276	0.265779	3.25242e-07	2.96574e-06	31	0.0596369	0.0160255	0.00708998	0.0122807	0.00323208	Pak3(0.97), Prkg1(0.72), Cit(0.6), Map1b(0.51), Map2(0.47), Reln(0.45), Reln(0.45), Strn(0.28), Ss18l1(0.28), Grip1(0.27), Ppp1r9b(0.27), Scarf1(0.27), Mecp2(0.24), Myo6(0.19), Flrt1(0.18), Baiap2(0.16), Syngap1(0.16), Bbs1(0.12), Igsf9(0.12), Abi2(0.11), Bbs4(0.1), App(0.06), App(0.06), Pak1(0.06), Rac1(0.06), Bdnf(-0.01), Hdac2(-0.09), Trappc4(-0.18), Nrp1(-0.19), Dab1(-0.49), Dab1(-0.49),
semaphorin receptor activity	0.00794263	0.370381	3.38126e-07	3.0753e-06	17	0.152155	0.0106879	0.00322265	0.00696712	0.00469893	Plxna2(0.69), Plxna2(0.69), Plxna2(0.69), Plxna4(0.54), Plxnc1(0.45), Plxnb1(0.39), Plxnb1(0.39), Nrp2(0.38), Plxnd1(0.32), Plxnd1(0.32), Plxna1(0.26), Plxnb2(-0.02), Plxna3(-0.18), Nrp1(-0.19), Nrp1(-0.19), Nrp1(-0.19), Nrp1(-0.19),
nuclear chromatin	0.00727243	0.116653	3.56932e-07	3.22985e-06	182	0.0194917	0.00832345	0.0447372	0.056055	0.000419358	Nr1d1(0.89), Mxd1(0.76), Jun(0.69), Jun(0.69), Junb(0.5), Crebbp(0.4), Crebbp(0.4), Smad3(0.4), Sirt1(0.4), Nrip1(0.39), Esr1(0.37), Smarca2(0.37), Tal1(0.35), Tcf4(0.35), Brd4(0.33), Smarca1(0.33), Arid1a(0.31), Arid1a(0.31), Klf4(0.3), Runx2(0.29), Etv3(0.29), Enc1(0.28), Runx3(0.27), Cited2(0.27), Plcb1(0.27), Rarg(0.27), Snai2(0.27), Trp63(0.27), Mef2a(0.26), Kdm2a(0.25), Mecp2(0.24), Ncoa3(0…
innervation	0.00583321	0.406137	3.56945e-07	3.22985e-06	14	0.141668	0.0834133	6.50337e-05	0.0094825	0.00699474	Chd7(0.59), Sulf1(0.52), Ret(0.51), Serpine2(0.41), Prkcg(0.36), Gabrb3(0.34), Fbxo45(0.24), Lrig2(0.23), Unc13a(0.23), Rnf165(0.21), Sulf2(0.15), Ntf5(0.15), Unc13b(0.1), Lrig1(0.08),
T-tubule	0.00300839	0.218574	3.58775e-07	3.23813e-06	57	0.167394	0.0139769	0.000237384	0.0093271	0.0190504	Ryr1(0.74), Cacna2d1(0.55), Cacna1c(0.5), Cacna1c(0.5), Cacna1c(0.5), Ednra(0.48), Stac(0.47), Dysf(0.45), Dysf(0.45), Akap6(0.44), Abcc9(0.42), Esr1(0.37), Atp1a2(0.35), Atp1a2(0.35), Igf1r(0.33), Igf1r(0.33), Tgfb3(0.3), Kcnj2(0.28), Nos1ap(0.27), Cacnb1(0.26), Cltc(0.22), Msn(0.21), Adra1b(0.18), Kcnj5(0.18), Cdh2(0.15), Camk2d(0.15), Slc9a1(0.09), Aqp4(0.08), Prkar2a(0.08), Adra1a(0.06), Ank3…
protein kinase A binding	0.00803715	0.33725	3.60066e-07	3.24151e-06	20	0.0932148	0.00619892	0.00170572	0.110198	0.000947172	Akap12(0.68), Myrip(0.5), Myrip(0.5), Akap13(0.48), Nbea(0.47), Akap6(0.44), Akap6(0.44), Dact1(0.4), Dact1(0.4), Lrrk2(0.23), Lrrk2(0.23), Akap2(0.21), Rara(0.14), Akap11(0.14), Akap10(0.06), Lrba(0.05), Akap7(-0.09), Dact2(-0.22), Dact3(-0.27), Rps3(-0.32),
positive regulation of pseudopodium assembly	0.0039052	0.418603	3.63279e-07	3.26214e-06	14	0.0821824	0.0418057	0.00535676	0.0085784	0.00125605	Cdc42ep4(0.43), Cdc42ep4(0.43), Cdc42ep3(0.43), Apc(0.35), Gm14137(0.27), F2rl1(0.23), Cdc42ep2(0.23), Cdc42ep2(0.23), Kit(0.17), Cdc42ep5(0.14), Cdc42ep5(0.14), Cdc42ep1(0.12), Cdc42ep1(0.12), Wash1(-0.1),
filopodium	0.0078749	0.21164	3.66099e-07	3.27914e-06	51	0.0603245	0.0617098	0.00356149	0.00793809	0.00199482	Utrn(0.5), Vcam1(0.47), Acpp(0.44), Dbn1(0.4), Myo1b(0.39), Kitl(0.37), Pdpn(0.32), Epha4(0.29), Fgd4(0.28), Kcnn3(0.27), Ppp1r9b(0.27), Ppp1r9b(0.27), Dync1h1(0.25), Myo10(0.25), Itga6(0.24), Srcin1(0.24), Cxadr(0.21), Msn(0.21), Rapgef3(0.21), Fat1(0.19), Spata13(0.19), Iqgap2(0.19), Palld(0.16), Fscn1(0.12), Fscn1(0.12), Vasp(0.12), Itgb1(0.11), Abi2(0.11), Dag1(0.1), Ppp1r9a(0.08), Ppp1r9a(0.…
lamellipodium assembly	0.0103991	0.250138	3.67932e-07	3.28723e-06	35	0.020105	0.0852678	0.00692182	0.00183638	0.0111892	S1pr1(0.59), Ccdc88a(0.43), Parvb(0.34), Cdh13(0.3), Pxn(0.29), Ablim1(0.29), Fgd4(0.28), Vcl(0.26), Nck2(0.24), Wasf2(0.23), Ptpro(0.2), Spata13(0.19), Kit(0.17), Whamm(0.17), Ablim3(0.13), Vav3(0.11), Arhgef7(0.1), Golph3(0.1), Carmil1(0.09), Rac1(0.06), Rac1(0.06), Rac1(0.06), Vav2(0.05), Capzb(0.01), Cyfip1(0.01), Ajuba(-0.03), Sh2b1(-0.03), Nck1(-0.05), Arhgef6(-0.06), Nckap1(-0.08), Nckap1(…
negative regulation of cytokine secretion	0.00664904	0.493997	3.68983e-07	3.28831e-06	10	0.158608	0.0297909	0.00880077	0.000380591	0.0072129	Il6(1.24), Nlrp12(1.12), Ffar4(0.66), Lrrc32(0.64), Srgn(0.55), Ptger4(0.55), Rgcc(0.27), Cidea(0.11), Lgr4(-0.08), Cx3cl1(-0.14),
negative regulation of transforming growth factor beta receptor signaling pathway	0.00675542	0.212885	3.75591e-07	3.33879e-06	51	0.080387	0.0267368	0.00595719	0.00131419	0.013661	Peg10(0.76), Smad7(0.41), Sirt1(0.4), Smad6(0.36), Skil(0.33), Tgfbr3(0.33), Tgfb3(0.3), Bambi(0.3), Adamtsl2(0.29), Adamtsl2(0.29), Cd109(0.29), Lemd3(0.28), Smurf1(0.27), Vasn(0.26), Ldlrad4(0.25), Ldlrad4(0.25), Ski(0.24), Ski(0.24), Pmepa1(0.24), Pmepa1(0.24), Glg1(0.23), Tgfb1i1(0.22), Chst11(0.22), Zfp451(0.2), Rasl11b(0.19), Hspa5(0.17), Cav1(0.16), Cav2(0.16), Prdm16(0.12), Cidea(0.11), P…
branching involved in mammary gland duct morphogenesis	0.0103443	0.409008	3.87062e-07	3.43215e-06	13	0.0378019	0.0154865	0.0073577	0.025397	0.00323041	Ccl11(0.83), Etv4(0.5), Epha2(0.41), Lrp6(0.38), Tbx3(0.35), Pml(0.32), Kdm5b(0.29), Src(0.26), Csf1(0.24), Slc12a2(0.16), Lrp5(0.05), Btrc(-0.03), Ddr1(-0.13),
positive regulation of catenin import into nucleus	0.00740092	0.473465	4.06726e-07	3.59542e-06	10	0.0298268	0.0207579	0.00301978	0.0153439	0.0138989	Egf(0.56), Smad3(0.4), Sfrp2(0.4), Dact1(0.4), Bambi(0.3), Ubr5(0.28), Egfr(0.25), Kank1(0.25), Sulf2(0.15), Sema5a(0.03),
ossification	0.0048596	0.186824	4.07508e-07	3.59542e-06	69	0.0927919	0.0125077	0.00854258	0.0114082	0.00254396	Col11a2(0.83), Stc1(0.69), Col13a1(0.6), Mmp9(0.59), Twist1(0.57), Sbno2(0.48), Rassf2(0.47), Mmp14(0.45), Runx1(0.44), Ifitm1(0.41), Ddr2(0.38), Ptn(0.36), Ctgf(0.35), Bmp2(0.34), Gpm6b(0.34), Foxc1(0.32), Pdlim7(0.3), Runx3(0.27), Spp1(0.26), Bmp3(0.26), Bcl2(0.24), Csf1(0.24), Eif2ak3(0.24), Tnfrsf11a(0.23), Bmp1(0.22), Sp1(0.22), Tmem119(0.22), Ecm1(0.21), Sp3(0.17), Igf2(0.16), Npr2(0.16), T…
cellular response to fluid shear stress	0.00958805	0.446816	4.0948e-07	3.60384e-06	11	0.103079	0.00123963	0.0104129	0.0265836	0.00637208	Ptgs2(1.16), Pkd2(0.3), Pkd2(0.3), Mef2c(0.26), Spp1(0.26), Src(0.26), Mtss1(0.23), Hdac5(0.22), Nfe2l2(0.19), Ptk2b(0.12), Hdac3(-0.03),
extrinsic component of membrane	0.0082599	0.173769	4.48525e-07	3.93767e-06	73	0.00147136	0.02132	0.0351311	0.0177575	0.0191228	Gfra1(0.65), Bsn(0.54), Bcl2l11(0.46), Nbeal2(0.41), Epb41l2(0.39), Wipi1(0.35), Ncf1(0.34), Anxa1(0.33), Farp1(0.33), Snx18(0.32), Micall1(0.3), Epb41l4a(0.26), Wdfy3(0.25), Snx33(0.23), Snx33(0.23), Tpr(0.22), Nbeal1(0.22), Msn(0.21), Epb41l3(0.2), Mgll(0.19), Mal(0.18), Rnf40(0.18), Mtmr3(0.17), Snx11(0.17), Mylip(0.16), Ehd2(0.15), Atg2a(0.15), Mcf2l(0.14), Vps13a(0.14), Rgs6(0.13), Epb41l4b(…
semaphorin receptor binding	0.00639416	0.340018	4.5291e-07	3.96632e-06	20	0.0219007	0.121343	0.000185135	0.0358697	0.00742502	Sema3e(0.69), Sema6d(0.65), Sema4c(0.62), Sema3a(0.42), Sema6b(0.42), Sema3f(0.39), Sema5b(0.39), Sema3d(0.31), Sh3bgrl3(0.3), Sema3g(0.3), Sema6a(0.26), Sema6a(0.26), Sema4b(0.22), Sema4g(0.22), Sema5a(0.03), Sema4d(0.01), Sema4d(0.01), Sema4a(-0.07), Sema3b(-0.14), Sema3c(-0.46),
JAK-STAT cascade	0.0120146	0.312482	4.55693e-07	3.98085e-06	22	0.00191295	0.0109374	0.025248	0.0263483	0.0286542	Socs3(0.85), Socs5(0.44), Ager(0.42), Jak2(0.31), Jak2(0.31), Jak2(0.31), Pkd2(0.3), Pkd1(0.25), Socs1(0.22), Stat3(0.21), Clcf1(0.18), Stat5a(0.1), Stat5a(0.1), Pias1(0.09), Stat5b(0.07), Stat5b(0.07), Pias4(0.06), Ctr9(-0.07), Ghr(-0.09), Il15ra(-0.15), Stat1(-0.26), Prlr(-0.29),
BMP signaling pathway	0.00543273	0.180391	4.62827e-07	4.03321e-06	77	0.400456	0.000850062	0.00135462	0.00765416	0.015475	Nog(0.96), Egr1(0.48), Smad6(0.36), Bmp2(0.34), Bmp2(0.34), Bmp2(0.34), Tgfbr3(0.33), Bmpr2(0.32), Bmpr2(0.32), Id1(0.32), Runx2(0.29), Smurf1(0.27), Smad1(0.26), Smad1(0.26), Smad1(0.26), Smad1(0.26), Smad1(0.26), Bmp3(0.26), Zcchc12(0.24), Acvr2b(0.22), Bmp1(0.22), Usp9x(0.22), Rgmb(0.2), Vsir(0.2), Fam83g(0.19), Bmpr1b(0.18), Bmpr1b(0.18), Bmpr1b(0.18), Bmpr1b(0.18), Fst(0.18), Smad9(0.17), Sm…
positive regulation of fibroblast migration	0.00942689	0.368966	4.64341e-07	4.03646e-06	16	0.0817037	0.0316356	0.0040512	0.00878098	0.00349768	Pak3(0.97), Thbs1(0.72), Itgb3(0.67), Itgb3(0.67), Ager(0.42), Ddr2(0.38), Fgfr1(0.36), Tgfb1(0.28), Tgfb1(0.28), Bag4(0.16), Arhgef7(0.1), Actr3(0.06), Prkce(0.03), Slc8a1(0.01), Dmtn(-0.12), Akt1(-0.13),
activation of JUN kinase activity	0.0118608	0.287383	4.68287e-07	4.06078e-06	26	0.0235372	0.00322106	0.0131276	0.016368	0.028776	Syk(0.63), Trf(0.61), Mapk8ip3(0.3), Dab2ip(0.3), Fgd4(0.28), Spag9(0.26), Zak(0.24), Ercc6(0.23), Tirap(0.21), Map3k1(0.2), Map4k2(0.2), Ptpn1(0.19), Ern1(0.18), Ern1(0.18), Gab1(0.17), Map2k4(0.08), Wnt7b(0.04), Axin1(0.01), Mdfic(0.01), Map3k11(0), Map2k7(-0.02), Map2k7(-0.02), Dab2(-0.08), Mul1(-0.12), Ccr7(-0.23), Wnt5a(-0.3),
embryonic organ development	0.0057227	0.276767	4.79728e-07	4.14844e-06	31	0.166946	0.0195466	0.000213468	0.0100229	0.0188368	Gli3(0.43), Rdh10(0.37), Setd2(0.37), Zfp36l1(0.32), Fgfr2(0.32), Hhex(0.31), Grhl2(0.29), Mkl2(0.25), Med12(0.23), Sox17(0.22), Kdm6a(0.22), Pdgfrb(0.19), Gata3(0.18), Tnrc6c(0.18), Rbbp6(0.17), Epn2(0.15), Ptch1(0.15), Zfpm2(0.12), Zfpm2(0.12), Syf2(0.1), Pbx1(0.05), Wdpcp(0.05), Wnt7b(0.04), Sp2(0.04), Palb2(0.04), Epn1(0.02), Bmpr1a(0.01), Uty(0), Wdr48(-0.02), Smo(-0.26), Trp53(-0.49),
skeletal system development	0.00470128	0.172907	4.8074e-07	4.14844e-06	90	0.226804	0.0406009	0.000858596	0.00485587	0.00306281	Nog(0.96), Col11a2(0.83), Mmp9(0.59), Mmp9(0.59), Chd7(0.59), Hoxc11(0.58), Sox11(0.57), Sh3pxd2b(0.57), Sh3pxd2b(0.57), Sox4(0.54), Edn1(0.53), Rassf2(0.47), Runx1(0.44), Dnm3os(0.44), Epha2(0.41), Vcan(0.4), Smad3(0.4), Tgfbr1(0.39), Col5a2(0.37), Tbx3(0.35), Gja5(0.34), Foxc1(0.32), Zbtb16(0.32), Fbn1(0.3), Runx2(0.29), Tgfb1(0.28), Lgals3(0.27), Trp63(0.27), Hdac4(0.27), Eif2ak3(0.24), Tgfb2(…
positive regulation of mast cell degranulation	0.005035	0.500494	4.85051e-07	4.17545e-06	10	0.119079	0.0408536	0.0137809	0.000910686	0.00336888	Syk(0.63), Syk(0.63), Il4ra(0.43), Fgr(0.36), Adora2b(0.32), Gab2(0.27), Gata2(0.2), Fcer1g(0.17), Fcer1g(0.17), Pld2(0.15),
negative regulation of extrinsic apoptotic signaling pathway	0.0100212	0.232388	4.86968e-07	4.17819e-06	40	0.00817315	0.0029951	0.0576049	0.0337678	0.00826613	Itgav(0.53), Cflar(0.45), Cflar(0.45), Tgfbr1(0.39), Phip(0.31), Lgals3(0.27), Src(0.26), Src(0.26), Sh3rf1(0.26), Itga6(0.24), Tcf7l2(0.23), Birc6(0.22), Rela(0.21), Rela(0.21), Rb1cc1(0.2), Htt(0.15), Acvr1(0.14), Igf1(0.12), Yap1(0.12), Peli3(0.12), Peli3(0.12), Siah2(0.1), Ripk1(0.08), Ripk1(0.08), Gclc(0.05), Sgms1(0.05), Cttn(0.03), Zmynd11(0.03), Rps6kb1(0.02), Bmp4(0.01), Nol3(-0.01), Lmn…
negative regulation of stem cell differentiation	0.0107215	0.441908	4.87731e-07	4.17819e-06	11	0.0389192	0.00619014	0.00476677	0.0288896	0.0140888	Notch1(0.64), Jag1(0.55), Cdk12(0.33), Ncoa3(0.24), Stat3(0.21), Cdk13(0.21), Zfp36l2(0.18), Hes1(0.12), Yap1(0.12), Trim6(0.06), Ccnk(0.02),
prostaglandin E receptor activity	0.00748703	0.493272	4.95676e-07	4.23599e-06	10	0.341165	0.0180337	0.00246105	0.00305808	0.00197061	Ptger2(0.89), Ptger2(0.89), Ptger4(0.55), Ptger4(0.55), Ptger3(0.17), Ptger3(0.17), Ptger3(0.17), Hpgd(0.11), Ptger1(-0.04), Ptger1(-0.04),
positive regulation of phosphorylation	0.0118692	0.287755	5.06319e-07	4.31652e-06	26	0.0151445	0.0263976	0.0536227	0.00362064	0.00564829	Ereg(0.79), Ereg(0.79), Thbs1(0.72), Ang(0.64), Trf(0.61), Egf(0.56), Apln(0.48), Irs1(0.4), Areg(0.37), Insr(0.32), Btbd10(0.29), Egfr(0.25), Itga6(0.24), Bcl10(0.16), Nckap1l(0.16), Kctd20(0.14), Lyn(0.11), Ripk1(0.08), Sdcbp(0.06), Fzd7(0.03), Grb10(-0.03), Ar(-0.12), Mif(-0.24), Ppargc1b(-0.25), Ccl5(-0.34), Glmn(-0.48),
fibronectin binding	0.0024788	0.340472	5.25185e-07	4.4666e-06	26	0.256601	0.183786	0.00128487	8.14263e-05	0.00499909	Tnc(0.86), Thbs1(0.72), Itgb3(0.67), Mmp9(0.59), Igfbp3(0.55), Itgav(0.53), Ctgf(0.35), Thbs4(0.35), Itga3(0.3), Vegfa(0.29), Igfbp5(0.28), Itga4(0.27), Itga4(0.27), Ccdc80(0.19), Sdc4(0.18), Ssc5d(0.16), Fbln1(0.11), Itgb1(0.11), Ctss(0.09), Ctsk(0.08), Fstl3(0), Plekha2(-0.09), Mmp2(-0.11), Mfap2(-0.18), Mmp13(-0.18), Hsd17b12(-0.19),
coronary vasculature development	0.00753194	0.262351	5.30335e-07	4.49958e-06	33	0.082392	0.00762041	0.0023831	0.0136734	0.0193498	Prdm1(0.57), Lrp1(0.45), Smad6(0.36), Cntrl(0.36), Ptk7(0.34), Tgfbr3(0.33), Plxnd1(0.32), Robo1(0.28), Kif7(0.26), Wt1(0.25), 2410089E03Rik(0.22), Dync2h1(0.22), Lrp2(0.21), Myh10(0.21), Pde2a(0.2), Ltbp1(0.19), Ndst1(0.18), Gpc3(0.17), Pcsk5(0.17), Adamts6(0.17), Megf8(0.1), Zbtb14(0.08), Dnm2(0.05), Sufu(0.05), Ap2b1(0.05), Bmp4(0.01), Fuz(0.01), Snx17(-0.01), Smarca4(-0.04), Prickle1(-0.08), …
positive regulation of JUN kinase activity	0.00839812	0.221662	5.45001e-07	4.61295e-06	44	0.00568855	0.000445436	0.0385528	0.124014	0.0168613	Tlr6(0.88), Il1b(0.69), Il1rn(0.62), Edn1(0.53), Fzd5(0.43), Ager(0.42), Map3k5(0.35), Zeb2(0.32), Tiam1(0.31), Mapk8ip3(0.3), Dab2ip(0.3), Dab2ip(0.3), Magi3(0.3), Epha4(0.29), Fzd4(0.29), Tnfrsf11a(0.23), Vangl2(0.16), Ptk2b(0.12), Traf6(0.11), Sash1(0.11), Dvl3(0.1), Arhgef5(0.08), Fzd8(0.07), Taok3(0.07), Dvl2(0.06), Dvl2(0.06), Pak1(0.06), Map3k4(0.04), Map3k4(0.04), Map3k4(0.04), Axin1(0.01…
cellular response to calcium ion	0.008486	0.260226	5.56765e-07	4.70127e-06	33	0.0326687	0.00413402	0.00805706	0.0559483	0.00796072	Fosb(1.12), Fos(0.83), Jun(0.69), Alox5ap(0.5), Junb(0.5), Akr1c18(0.44), Adgrv1(0.41), Itpkb(0.39), Mef2a(0.26), Mef2c(0.26), Cpne7(0.26), Slc25a24(0.26), Fus(0.26), Clic4(0.25), Braf(0.25), Iqgap1(0.22), Jund(0.21), Krt10(0.08), Nfatc3(0.06), Cpne2(0.04), Rasgrp2(0.02), Mylk(0.01), Rasa4(0), Cpne3(0), Gpld1(-0.02), Scn5a(-0.05), Slc25a23(-0.07), Carf(-0.1), Carf(-0.1), Dmtn(-0.12), Ect2(-0.24),…
vasculogenesis involved in coronary vascular morphogenesis	0.0102287	0.463941	5.58957e-07	4.70855e-06	10	0.0879024	0.00703425	0.00213586	0.002732	0.0743834	Notch1(0.64), Fgf1(0.45), Fgfr1(0.36), Tgfbr3(0.33), Fgfr2(0.32), Angpt1(0.25), Epor(0.16), Pbrm1(0.16), Fgf9(0.12), Zfpm2(0.12),
inner ear morphogenesis	0.00772409	0.227517	5.65427e-07	4.75174e-06	45	0.150837	0.00193332	0.00199658	0.0106433	0.0374932	Nr4a3(0.99), Aldh1a3(0.73), Chd7(0.59), Chd7(0.59), Tfap2a(0.49), Dll1(0.45), Spry2(0.44), Spry2(0.44), Foxi1(0.39), Itga8(0.39), Fgfr1(0.36), Ephb2(0.35), Bcr(0.35), Frzb(0.34), Frzb(0.34), Fgfr2(0.32), Celsr1(0.26), Six4(0.22), Atp2b2(0.21), Gata2(0.2), Myo6(0.19), Gata3(0.18), Insig1(0.16), Fgf9(0.12), Abr(0.05), Sobp(0.03), Mafb(0.02), Insig2(0.02), Myo7a(0.01), Fzd6(0), Prrx1(-0.02), Ush1c(-…
autophagy	0.00825604	0.152411	5.67022e-07	4.75385e-06	135	0.00143012	0.00332573	0.118276	0.0131545	0.0374476	S100a9(0.76), S100a8(0.74), Ptpn22(0.52), Itgb4(0.4), Wipi1(0.35), Trp53inp1(0.35), Atg16l2(0.32), Fnbp1l(0.29), Optn(0.27), Foxo1(0.25), Wdfy3(0.25), Ulk1(0.24), Npc1(0.23), Lrrk2(0.23), Dram1(0.22), Usp13(0.22), Atg14(0.21), Rb1cc1(0.2), Trp53inp2(0.2), Abl1(0.19), Plekhm1(0.19), Tecpr1(0.18), Pik3cb(0.18), Gopc(0.16), Atg2a(0.15), Vps13a(0.14), Rab33b(0.12), Hap1(0.11), Tollip(0.11), Zkscan3(0…
phosphatidylinositol 3-kinase binding	0.00975357	0.289766	5.89303e-07	4.92199e-06	26	0.111704	0.0347598	0.00216486	0.00801783	0.00505897	Tlr4(0.55), Irs2(0.49), Irs2(0.49), Irs1(0.4), Irs1(0.4), Fyn(0.37), Igf1r(0.33), Insr(0.32), Jak2(0.31), Dab2ip(0.3), Pdgfra(0.27), Flt3(0.26), Pdgfrb(0.19), Calm2(0.18), Axl(0.17), Coro1a(0.15), Tyro3(0.11), Met(0.1), Lck(0.03), Atp1a1(0.02), Becn1(-0.02), Calm1(-0.06), Ptk2(-0.06), Calm3(-0.19), Insrr(-0.27), Dab1(-0.49),
cardiac muscle cell proliferation	0.00790466	0.357387	5.8986e-07	4.92199e-06	18	0.113993	0.0163731	0.00517565	0.0194607	0.00189305	Notch1(0.64), Fgf1(0.45), Tgfbr3(0.33), Foxc1(0.32), Fgf2(0.31), 1190002N15Rik(0.31), 1190002N15Rik(0.31), Smad1(0.26), Smad1(0.26), Tgfb2(0.23), Tenm4(0.12), Rxra(0.07), Rxra(0.07), Rxra(0.07), Prkar1a(0.05), Ctnnb1(0.03), Foxc2(0.02), Rxrb(-0.12),
cytokine production	0.011778	0.325898	5.98696e-07	4.98397e-06	20	0.0774113	0.016718	0.00775407	0.00765151	0.00687802	Cxcl5(1.3), Itk(0.68), Rel(0.66), Pla2r1(0.56), Fabp4(0.48), Batf(0.44), S1pr3(0.43), Ptafr(0.42), Nfat5(0.41), Maf(0.34), Zcchc11(0.31), Nfatc2ip(0.18), Rasgrp1(0.18), Nfatc2(0.15), Slc37a4(0.1), Azi2(0.03), Irak4(-0.13), Lipa(-0.17), G6pdx(-0.22), Txk(-0.28),
calcium ion transmembrane transport	0.00461156	0.209823	6.05099e-07	5.02545e-06	57	0.317499	0.0262701	0.0035311	0.000418285	0.00806187	Atp2a1(0.84), Trpm6(0.83), Ryr1(0.74), P2ry12(0.74), Cacna2d2(0.66), Itpr3(0.62), Cacna2d1(0.55), Itgav(0.53), Cacna1c(0.5), Cacna1h(0.45), Slc24a3(0.43), Trpm2(0.39), Pkd2(0.3), Cacnb1(0.26), Itpr2(0.26), Pkd1(0.25), Catsper2(0.25), Tpcn2(0.25), Trpc1(0.23), Cacng7(0.23), Cacna1g(0.22), Ano6(0.22), Ano6(0.22), Atp2b2(0.21), Cacnb3(0.19), Atp2b1(0.19), Atp2a2(0.14), Atp2a3(0.1), Trpv6(0.1), Cacna…
costamere	0.00865847	0.345381	6.08587e-07	5.04258e-06	18	0.0596235	0.0378026	0.00136282	0.00642751	0.0210939	Cmya5(1.14), Ahnak(0.52), Synm(0.41), Krt19(0.26), Vcl(0.26), Vcl(0.26), Actg1(0.25), Svil(0.24), Trpc1(0.23), Homer1(0.21), Sdc4(0.18), Pgm5(0.11), Pgm5(0.11), Dag1(0.1), Dmd(0.06), Fxr1(0.01), Krt8(0.01), Ank2(-0.05),
cellular response to transforming growth factor beta stimulus	0.00890624	0.220602	6.144e-07	5.06701e-06	46	0.223951	0.00803617	0.0189068	0.0144285	0.000314797	Serpine1(0.52), Nos3(0.51), Runx1(0.44), Akr1c18(0.44), Smad7(0.41), Smad7(0.41), Dbn1(0.4), Ankrd1(0.4), Tgfbr1(0.39), Tgfbr1(0.39), Fyn(0.37), Col4a2(0.36), Apaf1(0.32), Zfp36l1(0.32), Tgfb1(0.28), Tgfb1(0.28), Mef2c(0.26), Src(0.26), Usp9x(0.22), Sox5(0.2), Zfp36l2(0.18), Mapk7(0.18), Cav1(0.16), Dnmt1(0.16), Acvrl1(0.11), Acvrl1(0.11), Ppargc1a(0.09), Actr3(0.06), Pdcd5(0.05), Sox9(0.04), Sox…
muscle organ development	0.0121638	0.233202	6.17237e-07	5.07857e-06	39	0.0246579	0.00955767	0.0146941	0.0361648	0.00522493	Zfhx3(0.67), Twist1(0.57), Lama5(0.42), Nphs1(0.41), Sirt1(0.4), Id3(0.39), Chd2(0.39), Tcf23(0.38), Unc45b(0.37), Zbtb42(0.33), Jph1(0.32), Usp2(0.25), Mkl2(0.25), Srpk3(0.24), Paxbp1(0.24), Mtss1(0.23), Kmt5b(0.22), Trim72(0.2), Chkb(0.14), Unc45a(0.11), Met(0.1), Met(0.1), Des(0.07), Sgcb(0.07), Dmd(0.06), Foxk1(0.05), Foxo4(0.05), Fxr1(0.01), Xbp1(-0.02), Etv1(-0.03), Cryab(-0.07), Frg1(-0.07…
negative regulation of cell adhesion	0.00971983	0.245271	6.44566e-07	5.29112e-06	36	0.0325376	0.00651625	0.00183657	0.031452	0.0415203	Tnc(0.86), Rnd1(0.62), Cldn7(0.43), Ager(0.42), Plxnb1(0.39), Plxnb1(0.39), Lamb1(0.38), Podxl(0.37), Erbb3(0.35), Nat8f1(0.31), Cdh13(0.3), Pde3b(0.29), Nat8f3(0.29), Jam2(0.27), Angpt1(0.25), Srcin1(0.24), Lpxn(0.23), Pik3r1(0.19), Cbll1(0.16), Rasa1(0.12), Acvrl1(0.11), Fbln1(0.11), Dscaml1(0.1), Nat8(0.04), Sema5a(0.03), Adam10(0.01), Sema4d(0.01), Plxnb2(-0.02), Spn(-0.03), Spn(-0.03), Mmp2(…
T cell homeostasis	0.0111075	0.28045	6.60839e-07	5.41215e-06	27	0.035456	0.0341117	0.0389842	0.00441163	0.0025262	Pmaip1(0.76), Il7r(0.5), Bcl2l11(0.46), Bcl2l11(0.46), Rc3h2(0.35), Rc3h1(0.33), P2rx7(0.32), Casp3(0.3), Jak3(0.29), Ahr(0.28), Tgfb1(0.28), Ripk3(0.28), Bcl2(0.24), Bcl2(0.24), Fas(0.19), Nckap1l(0.16), Coro1a(0.15), Chst3(0.13), Stat5a(0.1), Stat5b(0.07), Ppp3cb(-0.03), Ppp2r3c(-0.05), Slc39a3(-0.07), Spns2(-0.12), Fadd(-0.25), Zc3h8(-0.38), Ccnb2(-0.65),
regulation of sensory perception of pain	0.00360872	0.355863	6.70824e-07	5.48123e-06	22	0.260193	0.00832394	0.00499269	0.0016169	0.0122269	Tlr4(0.55), Edn1(0.53), Ncam1(0.52), Ednrb(0.5), Adrb2(0.47), Acpp(0.44), Acpp(0.44), Fgfr1(0.36), Adora1(0.32), Rtn4(0.25), Mgll(0.19), F2r(0.17), Grin2d(0.13), Ctss(0.09), Slc9a1(0.09), Fcgr4(0.08), Nos1(0.01), Npff(-0.02), Cck(-0.04), Kcnj10(-0.2), Tmem100(-0.37), Comt(-0.51),
regulation of synaptic plasticity	0.0118711	0.26542	6.76114e-07	5.51173e-06	30	0.0149979	0.00993532	0.00900633	0.0486553	0.0112393	Plk2(0.7), Plk2(0.7), Shank3(0.61), Ncam1(0.52), Vgf(0.47), Rapgef2(0.36), Adora1(0.32), Mef2c(0.26), Mecp2(0.24), Atp2b2(0.21), Cpeb3(0.2), Adora2a(0.19), Myo6(0.19), Lzts1(0.19), Baiap2(0.16), Syngap1(0.16), Htt(0.15), Nfatc4(0.15), Rara(0.14), Sipa1l1(0.11), Calb1(0.05), Bdnf(-0.01), Spg11(-0.01), Psen1(-0.02), Psen1(-0.02), Eif4ebp2(-0.04), Ywhag(-0.06), Cdk5(-0.09), Psen2(-0.15), Gipc1(-0.17…
lateral plasma membrane	0.0104462	0.217604	6.79182e-07	5.52366e-06	45	0.00529525	0.0487329	0.037811	0.024726	0.00220013	Cldn4(0.69), Nkd2(0.68), Gja1(0.63), Prickle2(0.54), Cldn7(0.43), Cldn7(0.43), Abcc6(0.4), Cdh1(0.38), Apc(0.35), Erbb3(0.35), Anxa1(0.33), Epcam(0.26), Pkd1(0.25), Sptan1(0.23), Iqgap1(0.22), Tacstd2(0.22), Ptpro(0.2), Jup(0.19), Ocln(0.17), Vangl2(0.16), Dsg2(0.13), Myo1c(0.11), Cldn3(0.07), Cldn3(0.07), Ank3(0.06), Dlg1(0.06), Dvl2(0.06), Mark2(0.06), Rab13(0.04), Ctnnb1(0.03), Ctnnb1(0.03), N…
regulation of alternative mRNA splicing, via spliceosome	0.00716254	0.228741	6.807e-07	5.52366e-06	41	0.0154647	0.0132617	0.0283265	0.00297617	0.0384737	Malat1(0.57), Rbm4(0.44), Rbm4(0.44), Celf4(0.4), Dyrk1a(0.29), Ddx5(0.26), Rbmxl1(0.25), Rbm5(0.23), Rbfox2(0.22), Rbfox2(0.22), Mbnl2(0.2), Mbnl2(0.2), Rbm25(0.16), Rbm15b(0.16), Rbm15b(0.16), Uhmk1(0.15), Tra2b(0.15), Wtap(0.15), Wtap(0.15), Nsrp1(0.12), Celf3(0.08), Thrap3(0.08), Fmr1(0.07), Fmr1(0.07), Rbmx(0.03), Srek1(0.03), Ptbp1(0), Srsf2(0), Hnrnpl(-0.01), Hnrnpl(-0.01), Mbnl1(-0.03), R…
cortical cytoskeleton	0.00675231	0.287973	7.10117e-07	5.74918e-06	30	0.0480783	0.036058	0.00929738	0.0275721	0.00114733	Slc4a1(0.91), Slc4a1(0.91), Sele(0.85), Ank1(0.73), Nos2(0.45), Flna(0.42), Gypc(0.41), Gypc(0.41), Myh9(0.39), Inpp5d(0.37), Sptb(0.32), Actn1(0.24), Sptan1(0.23), Sptbn1(0.18), Tpm4(0.18), Tmod1(0.16), Actn4(0.16), Tpm3(0.12), Actb(0.1), Dlg4(0.1), Nsmf(0.04), Cttn(0.03), Capzb(0.01), Capza1(-0.04), Epb41(-0.05), Epb41(-0.05), Capza2(-0.06), Dmtn(-0.12), Mpp1(-0.41), Epb42(-0.67),
calcium-mediated signaling	0.00871349	0.276233	7.41609e-07	5.98635e-06	28	0.112406	0.00641822	0.00588058	0.0187969	0.0068951	Cxcr4(0.86), Drd1(0.69), Edn1(0.53), Tox3(0.46), Rcan2(0.39), Sphk1(0.36), Ppp1r9b(0.27), Tpcn2(0.25), Eif2ak3(0.24), Avpr1a(0.24), Lrrk2(0.23), Kiss1r(0.23), Plcg1(0.2), Agtr1a(0.17), Rcan1(0.17), Pdpk1(0.1), Rcan3(0.1), Alms1(0.1), Cacna1d(0.09), Ppp1r9a(0.08), Cabyr(0.06), Ccr5(0.04), Ncald(0.04), Mcu(-0.02), Lat2(-0.03), Ppp3ca(-0.06), Ksr2(-0.14), Tnf(-0.19),
microtubule plus-end binding	0.0109206	0.423104	7.42795e-07	5.98635e-06	12	0.0634037	0.0311776	0.0264989	0.0115842	0.000771686	Apc(0.35), Apc(0.35), Clasp2(0.25), Stim1(0.19), Clip1(0.19), Clip1(0.19), Clasp1(0.14), Clip2(0.14), Clip2(0.14), Mapre1(0.1), Kif18a(-0.18), Mlph(-0.25),
PDZ domain binding	0.00943679	0.143551	7.47233e-07	6.00843e-06	106	0.112996	0.00150904	0.0127611	0.0221132	0.00969583	Cxxc4(0.74), Slc9a3(0.73), Musk(0.67), Gja1(0.63), Cit(0.6), Sntb1(0.55), Erc1(0.41), Rapgef2(0.36), Grasp(0.35), Tgfbr3(0.33), Mpp3(0.31), Fzd4(0.29), Crim1(0.29), Ccdc88c(0.29), Pdzk1(0.27), Nos1ap(0.27), Arhgap29(0.26), Slc34a1(0.23), Ncoa2(0.22), Fzd2(0.22), Adgrl2(0.22), Atp2b2(0.21), Atp2b2(0.21), Cxadr(0.21), Lrp2(0.21), Lnx2(0.2), Apba1(0.2), Atp2b1(0.19), Atp2b1(0.19), Nkd1(0.19), Synj2(…
sarcolemma	0.00160035	0.18018	7.50306e-07	6.01946e-06	107	0.273215	0.0270426	0.000273873	0.00183301	0.0309514	Ryr1(0.74), Ank1(0.73), Plec(0.56), Alox5(0.53), Ahnak(0.52), Nos3(0.51), Slc2a5(0.51), Cacna1c(0.5), Utrn(0.5), Slc38a2(0.48), Adrb2(0.47), Vcam1(0.47), Prkcq(0.46), Dysf(0.45), Dysf(0.45), Cacna1h(0.45), Akap6(0.44), Alox12(0.42), Abcc9(0.42), Synm(0.41), Sync(0.39), Lama2(0.38), Atp1a2(0.35), Atp1a2(0.35), Kcnj8(0.34), Anxa1(0.33), Krt19(0.26), Vcl(0.26), Pde9a(0.22), Cltc(0.22), Trim72(0.2), …
type II transforming growth factor beta receptor binding	0.00250541	0.546641	7.55251e-07	6.04543e-06	10	0.294984	0.0921965	0.00408718	0.00196847	0.000388377	Cd44(0.49), Tgfbr1(0.39), Tgfbr3(0.33), Tgfb3(0.3), Tgfb3(0.3), Tgfb1(0.28), Tgfb1(0.28), Tgfb2(0.23), Tgfb2(0.23), Eng(0.2),
cellular response to vascular endothelial growth factor stimulus	0.00935876	0.319303	7.75946e-07	6.19706e-06	22	0.0976507	0.0239849	0.00393338	0.0178644	0.00333771	Notch1(0.64), Nr4a1(0.58), Egr3(0.54), Kdr(0.51), Flt1(0.5), Dll4(0.44), Flt4(0.38), Dab2ip(0.3), Dab2ip(0.3), Vegfa(0.29), Vegfa(0.29), Prkd2(0.29), Prkd1(0.18), Ern1(0.18), Mapk14(0), Mapkapk2(-0.03), Mapkapk2(-0.03), Ramp2(-0.04), Hspb1(-0.08), Akt1(-0.13), Nrp1(-0.19), Itgb1bp1(-0.21),
activation of adenylate cyclase activity	0.00947023	0.440902	8.30492e-07	6.61775e-06	11	0.0353955	0.00597779	0.00482317	0.0253286	0.0321777	Drd1(0.69), Drd1(0.69), Adcy1(0.48), Adrb2(0.47), Tshr(0.39), Adcy3(0.29), Adcy4(0.28), Gnal(0.2), Calca(0.17), Calca(0.17), Adcy7(0.01),
positive regulation of epithelial cell migration	0.0129278	0.247389	8.79938e-07	6.99492e-06	34	0.0167398	0.0326268	0.00703534	0.0138206	0.0197454	Jun(0.69), Insl3(0.57), Glipr2(0.5), Itga2(0.44), Hif1a(0.34), Bmpr2(0.32), Itga3(0.3), Gab2(0.27), Src(0.26), Clasp2(0.25), Tgfb2(0.23), Dock1(0.23), Tac1(0.22), Dock5(0.21), Plcg1(0.2), Tgfbr2(0.14), Clasp1(0.14), Hyal1(0.12), Ppm1f(0.1), Rab11a(0.09), Aqp1(0.08), Rreb1(0.06), Sox9(0.04), Sox9(0.04), Sox9(0.04), Epb41l5(0.04), Prkce(0.03), Hdac6(0.02), Capn7(-0.02), Enpp2(-0.08), Rab25(-0.11), …
phosphoprotein phosphatase activity	0.0131191	0.129979	8.81779e-07	6.99492e-06	124	0.00869116	0.0436699	0.0927699	0.00627248	0.00274104	Dusp10(0.72), Eya4(0.69), Dusp1(0.57), Ptpn22(0.52), Ppp1r3b(0.44), Ptprj(0.43), Ptpn14(0.42), Tns2(0.42), Ptpn12(0.39), Ptpn12(0.39), Ptprb(0.39), Ptprm(0.38), Dusp14(0.36), Dusp7(0.36), Dusp6(0.35), Dusp5(0.35), Dusp8(0.32), Ptpn13(0.31), Ptprc(0.31), Ctdspl2(0.31), Ppp1r3d(0.3), Ppp1r12a(0.29), Ctdsp2(0.27), Ptpru(0.26), Ssh2(0.26), Ptprd(0.25), Ptprg(0.25), Ptpn21(0.25), Ssh1(0.24), Ptpn18(0.…
retina vasculature development in camera-type eye	0.00729323	0.475354	8.89828e-07	7.04298e-06	10	0.103477	0.00444568	0.00329074	0.00458634	0.0693625	Pdgfb(0.45), Hif1a(0.34), Bmpr2(0.32), Pdgfra(0.27), Cyp1b1(0.24), Acvr2b(0.22), Pdgfrb(0.19), Pdgfrb(0.19), Acvrl1(0.11), Rom1(0.11),
endoderm development	0.0136418	0.272135	9.10723e-07	7.19227e-06	28	0.0302072	0.00442872	0.0217803	0.0120959	0.0284856	Nog(0.96), Arc(0.81), Notch1(0.64), Angpt2(0.56), Smad3(0.4), Bptf(0.37), Hhex(0.31), Tgfb1(0.28), Angpt1(0.25), Med12(0.23), Sox17(0.22), Ankrd17(0.18), Tnrc6c(0.18), Hnf1b(0.14), Angpt4(0.11), Hdac1(0.09), Hdac1(0.09), Ext1(0.08), Smad4(0.05), Epb41l5(0.04), Bmp4(0.01), Bmpr1a(0.01), Kif16b(0), Smad2(-0.03), Dab2(-0.08), Nckap1(-0.08), Pelo(-0.15), Pelo(-0.15),
fibroblast growth factor binding	0.0100537	0.260024	9.16151e-07	7.21903e-06	31	0.00760766	0.0169511	0.00199944	0.0627114	0.0436898	Thbs1(0.72), Itgb3(0.67), Cxcl13(0.61), Itgav(0.53), Fgfr1(0.36), Fgfr1(0.36), Fgfr1(0.36), Tgfbr3(0.33), Fgfr2(0.32), Fgfr2(0.32), Kl(0.27), Kl(0.27), Glg1(0.23), Glg1(0.23), Fgfbp1(0.18), Fgfbp3(0.18), Fgfbp3(0.18), Fgfr4(0.16), Fgfr3(0.12), S100a13(0.12), Gpc1(0.02), Cep57(0.01), Cep57(0.01), Fgfrl1(-0.03), Scn5a(-0.05), Api5(-0.12), Fibp(-0.12), Hspa9(-0.13), Smn1(-0.25), Rps2(-0.27), Rps19(-…
RNA polymerase II activating transcription factor binding	0.0124469	0.263245	9.41411e-07	7.40159e-06	30	0.0773209	0.0113188	0.00704794	0.0126677	0.0118379	Bhlhe41(0.74), Bhlhe41(0.74), Jun(0.69), Bhlhe40(0.43), Hipk2(0.42), Smad3(0.4), Egr2(0.36), Hey2(0.35), Tbx3(0.35), Ep300(0.33), Ep300(0.33), Cited2(0.27), Creb1(0.19), Nfe2l2(0.19), Trp53bp1(0.17), Rb1(0.15), Ncor1(0.14), Zfpm1(0.12), Ldb1(0.08), Sin3a(0.06), Atf2(0.04), Ctnnb1(0.03), Setd3(0.01), Lmo2(-0.03), Hnf4a(-0.1), Ifi27(-0.14), Pitx2(-0.17), Exosc9(-0.24), Mad2l2(-0.3), Eomes(-0.35),
glucose homeostasis	0.0103059	0.144363	9.63016e-07	7.55108e-06	101	0.0514391	0.00769366	0.00343975	0.0144334	0.0442013	Il6(1.24), Stxbp5l(0.64), Nmb(0.6), G6pc(0.58), G6pc(0.58), Sox4(0.54), Cacna1c(0.5), Adgrf5(0.5), Vgf(0.47), Sh2b2(0.46), Cry2(0.44), Rbm4(0.44), Ero1lb(0.39), C1qtnf3(0.35), Pygl(0.35), Hif1a(0.34), Gpr39(0.34), Insr(0.32), Pde3b(0.29), Igfbp5(0.28), Foxo1(0.25), Slc18a2(0.24), Pparg(0.23), Ncor2(0.23), Tcf7l2(0.23), Tcf7l2(0.23), Mbd5(0.23), Stat3(0.21), Sesn3(0.21), Sesn3(0.21), Adra1b(0.18),…
transcriptional repressor activity, RNA polymerase II transcription regulatory region sequence-specific binding	0.0113347	0.223045	9.64694e-07	7.55108e-06	42	0.0315237	0.0942674	0.00510874	0.00819582	0.0061578	E2f7(0.85), Arid5b(0.54), Bcl6b(0.46), Zeb1(0.4), Zeb1(0.4), Glis1(0.37), Zeb2(0.32), Hhex(0.31), Tcf7(0.31), Etv3(0.29), Bcl6(0.25), Foxo1(0.25), Nfkb1(0.21), Purb(0.21), Zbtb4(0.21), Snai1(0.18), Aebp1(0.17), Jarid2(0.16), Ppard(0.16), Hes6(0.16), Nfatc4(0.15), Satb1(0.14), Zfp280d(0.13), Klf12(0.12), Nfatc1(0.1), Foxo3(0.1), Foxo3(0.1), Zfp280b(0.08), Cggbp1(0.08), Nfatc3(0.06), Arhgap35(0.06)…
activin binding	0.00873085	0.379487	9.75364e-07	7.61775e-06	16	0.172036	0.00221051	0.0979673	0.00139873	0.00515478	Smad7(0.41), Tgfbr3(0.33), Acvr1b(0.29), Acvr1b(0.29), Acvr2b(0.22), Acvr2b(0.22), Acvr2b(0.22), Fst(0.18), Acvr1(0.14), Acvr1(0.14), Acvrl1(0.11), Acvr2a(0.1), Acvr2a(0.1), Fstl3(0), Fstl3(0), Fkbp1a(-0.22),
negative regulation of osteoblast differentiation	0.00932978	0.227927	9.95503e-07	7.75791e-06	41	0.157142	0.00161903	0.00634568	0.0354601	0.00860355	Nog(0.96), Notch1(0.64), Noct(0.59), Twist1(0.57), Twist1(0.57), Rorb(0.49), Smad3(0.4), Id3(0.39), Areg(0.37), Fgfr1(0.36), Id1(0.32), Igfbp5(0.28), Fndc3b(0.27), Hdac4(0.27), Ski(0.24), Hdac5(0.22), Hdac7(0.2), Ptch1(0.15), Nbr1(0.14), Twsg1(0.14), Trpm4(0.11), Nfatc1(0.1), Id2(0.07), Lrp5(0.05), Tmem64(0.04), Sfrp1(0.02), Sema4d(0.01), Tob1(0.01), Limd1(0.01), Hoxa2(0), Men1(-0.06), Men1(-0.06…
pathway-restricted SMAD protein phosphorylation	0.00661384	0.428412	1.01875e-06	7.92164e-06	13	0.371123	0.0466695	0.0021311	0.0021936	0.00182635	Smad7(0.41), Tgfbr1(0.39), Bmp2(0.34), Tgfbr3(0.33), Tgfbr3(0.33), Tgfb1(0.28), Tgfb1(0.28), Tgfb2(0.23), Tgfb2(0.23), Acvr1(0.14), Tgfbr2(0.14), Usp15(0.04), Gdf6(-0.31),
maternal behavior	0.0144244	0.397263	1.08286e-06	8.40163e-06	13	0.021573	0.0124087	0.0192184	0.0130006	0.021175	Drd1(0.69), Kalrn(0.39), Crebrf(0.27), Crebrf(0.27), Avpr1a(0.24), Avpr1a(0.24), Oxtr(0.22), Oxtr(0.22), Npas3(0.22), Nr3c1(0.19), Gnaq(0.12), Mbd2(0.04), Pten(0.02),
negative regulation of tumor necrosis factor production	0.00798169	0.247058	1.11905e-06	8.66343e-06	38	0.117655	0.0385619	0.0102523	0.00109945	0.0123945	C5ar2(0.8), Havcr2(0.71), Twist1(0.57), Gpnmb(0.57), Ptger4(0.55), Tlr4(0.55), Tnfaip3(0.54), Ptpn22(0.52), Ptpn22(0.52), Zc3h12a(0.46), Zc3h12a(0.46), Irak3(0.4), Irak3(0.4), Sirt1(0.4), Nod2(0.4), Flt3(0.26), Arrb2(0.19), Axl(0.17), Rara(0.14), Nlrc3(0.13), Nlrc3(0.13), Cd34(0.11), Cidea(0.11), Akap8(0.08), Cactin(0.07), Vimp(0.04), Trim30a(0.03), Lbp(-0.01), Hdac3(-0.03), Nfkbil1(-0.13), Nr1h4…
ventricular trabecula myocardium morphogenesis	0.00672536	0.408501	1.13576e-06	8.7736e-06	14	0.273277	0.0438467	0.00249076	0.0022981	0.00441706	Notch1(0.64), Chd7(0.59), Dll4(0.44), Hey1(0.43), Heg1(0.43), Tgfbr1(0.39), Ccm2l(0.36), Hey2(0.35), Tgfb2(0.23), Eng(0.2), Med1(0.05), Ube4b(0.04), Bmpr1a(0.01), Rbpj(-0.05),
negative regulation of endothelial cell proliferation	0.00770347	0.287117	1.15239e-06	8.8827e-06	28	0.13376	0.0854057	0.00304241	0.00142942	0.00912237	Thbs1(0.72), Thbs1(0.72), Gja1(0.63), Vash1(0.57), Sulf1(0.52), Ager(0.42), Tgfbr1(0.39), Ptprm(0.38), Nf1(0.29), Nf1(0.29), Rgcc(0.27), Krit1(0.18), Cav1(0.16), Cav1(0.16), Cav2(0.16), Cav2(0.16), Xdh(0.16), Acvrl1(0.11), Apoe(0.11), Apoh(0.09), Sparc(0.09), Nr2f2(0.06), Synj2bp(-0.02), Atp5a1(-0.06), Atoh8(-0.07), Atpif1(-0.24), Stat1(-0.26), Aimp1(-0.3),
spleen development	0.0117943	0.236908	1.18009e-06	9.07645e-06	37	0.281239	0.0297979	0.0112893	0.00175433	0.00191875	Kmt2a(0.53), Bcl2l11(0.46), Cdkn2b(0.39), Rc3h2(0.35), Rc3h1(0.33), Tet2(0.32), Mfsd7b(0.3), Ahr(0.28), Ripk3(0.28), Cited2(0.27), Rbm15(0.27), Flt3(0.26), Hoxb4(0.25), Bcl2(0.24), Bcl2(0.24), Tcf21(0.22), Abl1(0.19), Fas(0.19), Jarid2(0.16), Dicer1(0.16), Adam17(0.09), Cacnb4(0.08), Nfkb2(0.06), Pbx1(0.05), Pbx1(0.05), Bcl3(0.04), Slc40a1(0), Ctc1(-0.01), Prkdc(-0.04), Ppp2r3c(-0.05), Samd9l(-0.…
voltage-gated calcium channel complex	0.00381409	0.376283	1.19158e-06	9.14492e-06	20	0.659794	0.100892	0.000334667	0.000108366	0.00487739	Pde4b(0.68), Cacna2d2(0.66), Cacna2d1(0.55), Cacna1c(0.5), Cacna1c(0.5), Cacna1h(0.45), Pde4d(0.33), Cacnb1(0.26), Cacnb3(0.19), Cacnb3(0.19), Cacna1d(0.09), Cacna1d(0.09), Cacnb4(0.08), Cacnb4(0.08), Cacnb4(0.08), Cacnb2(0.07), Cacnb2(0.07), Cacna1a(0.03), Cacna1a(0.03), Ppm1a(-0.05),
neural tube development	0.0137688	0.226105	1.26776e-06	9.70854e-06	40	0.130222	0.0125006	0.00304576	0.0164448	0.0113545	Nog(0.96), Plxna2(0.69), Notch1(0.64), Gli3(0.43), Epha2(0.41), Sfrp2(0.4), Dact1(0.4), Stil(0.39), Lrp6(0.38), Ttbk2(0.33), Zfp36l1(0.32), Tcf7(0.31), Nf1(0.29), Grhl2(0.29), Cecr2(0.29), Dchs1(0.25), Tcf7l2(0.23), Med12(0.23), Kdm6a(0.22), Aldh1a2(0.14), Hes1(0.12), C2cd3(0.1), Ambra1(0.08), Ift172(0.06), Intu(0.04), Tulp3(0.03), Kif3a(0.02), Sfrp1(0.02), Tbc1d32(0.02), Sall2(-0.02), Sall1(-0.0…
mRNA 3'-UTR binding	0.0067642	0.217285	1.29317e-06	9.88174e-06	48	0.00314001	0.0105903	0.0251329	0.07998	0.0173533	Cpeb4(0.51), Zc3h12a(0.46), Rbm4(0.44), Rbms3(0.39), Zfp36(0.37), Zfp36(0.37), Rc3h1(0.33), Zfp36l1(0.32), Cpeb3(0.2), Cpeb3(0.2), Zfp36l2(0.18), Rnf40(0.18), Elavl1(0.15), Elavl1(0.15), Secisbp2l(0.15), Cirbp(0.13), Carhsp1(0.13), Hnrnpr(0.12), Pum2(0.12), Mex3d(0.11), Hnrnpa2b1(0.1), Ybx2(0.08), Fmr1(0.07), Fmr1(0.07), Pum1(0.07), Pum1(0.07), Rnf20(0.07), Angel2(0.05), Secisbp2(0.05), Secisbp2(…
negative regulation of Ras protein signal transduction	0.012871	0.270299	1.312e-06	1.0004e-05	28	0.0668712	0.049575	0.00664717	0.00151203	0.0276797	Spry2(0.44), Dab2ip(0.3), Dab2ip(0.3), Nf1(0.29), Nf1(0.29), Rasa3(0.25), Tnk1(0.24), Tgfb2(0.23), Rabgef1(0.23), Rasa2(0.23), Timp2(0.21), Rapgef1(0.17), Spry1(0.16), Syngap1(0.16), Syngap1(0.16), Fbp1(0.12), Rasa1(0.12), Ppp2cb(0.11), Rasal2(0.11), Mfn2(0.01), Rasa4(0), Stambp(-0.02), Dgkz(-0.11), Mapkap1(-0.13), Rasal3(-0.14), Rasal3(-0.14), Trim67(-0.26), Rasal1(-0.69),
desmosome	0.0149585	0.318627	1.32464e-06	1.00787e-05	20	0.0191576	0.024664	0.00874155	0.0388766	0.0100693	Dsc2(0.67), Dsc2(0.67), Dsp(0.5), Dsp(0.5), Tchp(0.28), Jup(0.19), Jup(0.19), Jup(0.19), B4galt1(0.18), Pkp4(0.16), Dsg2(0.13), Dsg2(0.13), Pnn(0.09), Uba1(0.07), Pof1b(0.03), Pkp3(0), Pkp2(-0.02), Cdsn(-0.03), Kazn(-0.08), Jam3(-0.14),
cAMP binding	0.00525796	0.372105	1.38831e-06	1.05404e-05	18	0.111894	0.0584503	0.00159713	0.00190878	0.031865	Pde4b(0.68), Rapgef4(0.63), Rapgef4(0.63), Pde1c(0.62), Pde10a(0.52), Pde3a(0.43), Prkar1b(0.32), Pde3b(0.29), Rapgef3(0.21), Pde2a(0.2), Pde2a(0.2), Pde4a(0.1), Prkar2a(0.08), Prkar1a(0.05), Prkar2b(-0.14), Cnbd2(-0.18), Hcn3(-0.22), Hcn2(-0.54),
microtubule motor activity	0.0117038	0.205517	1.44732e-06	1.0965e-05	49	0.0782639	0.0139447	0.0404521	0.00341518	0.00832101	Kif23(0.66), Dnah12(0.6), Dnah17(0.58), Dnah10(0.49), Kif13b(0.4), Stard9(0.36), Stard9(0.36), Klc3(0.34), Kif7(0.26), Kif7(0.26), Dync1h1(0.25), Klc1(0.25), Kif21b(0.24), Kifc2(0.22), Dync2h1(0.22), Kif1b(0.19), Kif13a(0.18), Kif3c(0.17), Kif26b(0.17), Kif21a(0.14), Kif5c(0.12), Kif3b(0.11), Kif5b(0.11), Kif5b(0.11), Dync1li2(0.11), Bbs4(0.1), Kif1c(0.07), Kif2a(0.06), Klc4(0.06), Kif9(0.05), Ki…
platelet-derived growth factor receptor binding	0.0120357	0.33688	1.45752e-06	1.10186e-05	18	0.135077	0.0812958	0.00309325	0.000709098	0.021194	Il1r1(0.49), Pdgfb(0.45), Pdgfb(0.45), Ptprj(0.43), Vegfa(0.29), Pdgfa(0.28), Pdgfa(0.28), Pdgfra(0.27), Pdgfrb(0.19), Pik3r1(0.19), Rasa1(0.12), Lyn(0.11), Pdgfd(0.04), Pdgfd(0.04), Pdgfc(0.03), Pdgfc(0.03), Pten(0.02), Vegfd(-0.28),
embryonic placenta development	0.0136403	0.284865	1.48202e-06	1.118e-05	25	0.0272005	0.0454165	0.0137716	0.018593	0.00542165	Prdm1(0.57), Epas1(0.48), Pdgfb(0.45), Hectd1(0.43), Bptf(0.37), Hif1a(0.34), Hif1a(0.34), Pkd2(0.3), Cited2(0.27), Egfr(0.25), Pkd1(0.25), Arnt(0.22), Sp1(0.22), Gata2(0.2), Sp3(0.17), Cebpb(0.1), Med1(0.05), Slc8a1(0.01), Spint1(0.01), Tfeb(-0.01), Cebpa(-0.08), Tmed2(-0.1), Esrrb(-0.14), Hsf1(-0.2), Ttpa(-0.51),
calcium-dependent cell-cell adhesion via plasma membrane cell adhesion molecules	0.0138714	0.355574	1.49101e-06	1.12238e-05	16	0.0594505	0.00979799	0.00814829	0.0134686	0.0262507	Pcdhga12(0.51), Pcdhgc3(0.43), Ceacam1(0.41), Cdh1(0.38), Pcdhb16(0.31), Cdh13(0.3), Pcdh18(0.23), Cdh2(0.15), Cdh2(0.15), Pcdh12(0.14), Pcdh1(0.12), Arvcf(0.11), Atp2c1(0.06), Ajuba(-0.03), Cdh16(-0.04), Cdh16(-0.04),
cGMP-stimulated cyclic-nucleotide phosphodiesterase activity	0.0102774	0.29853	1.53322e-06	1.15171e-05	24	0.0358697	0.0852534	0.000868045	0.00944665	0.0372759	Pde4b(0.68), Pde1c(0.62), Pde10a(0.52), Pde6a(0.47), Pde3a(0.43), Pde4d(0.33), Pde3b(0.29), Pde8b(0.28), Pde7b(0.23), Pde9a(0.22), Tdp2(0.22), Pde2a(0.2), Pde2a(0.2), Pde7a(0.19), Pde1a(0.14), Pde8a(0.12), Pde4a(0.1), Pde1b(0.09), Pde12(-0.01), Usb1(-0.03), Smpdl3a(-0.08), Pde5a(-0.16), Enpp6(-0.21), Smpdl3b(-1.36),
sympathetic nervous system development	0.0128758	0.432294	1.5548e-06	1.16544e-05	11	0.0737284	0.0271674	0.0129901	0.00272203	0.0202297	Gdnf(1.1), Sox11(0.57), Sox4(0.54), Plxna4(0.54), Tfap2a(0.49), Nf1(0.29), Trp63(0.27), Erbb2(0.25), Gata3(0.18), Tfap2b(0.06), Nrp1(-0.19),
ruffle	0.0129555	0.16478	1.56848e-06	1.17321e-05	77	0.00737497	0.0186511	0.058738	0.033135	0.00619572	Gas7(0.62), Cit(0.6), Eps8l1(0.6), Sh2b2(0.46), Myh9(0.39), Tln1(0.36), Tln2(0.35), Arap3(0.35), Pdpn(0.32), Pdlim7(0.3), Rinl(0.29), Gsn(0.28), Myo9b(0.26), Myo9b(0.26), Myo10(0.25), Rock1(0.25), Actn1(0.24), Wasf2(0.23), Iqgap1(0.22), Plcg1(0.2), Abl1(0.19), Gnas(0.19), Myo6(0.19), Acap2(0.19), Tmod3(0.17), Cyth3(0.16), Palld(0.16), Fgd1(0.14), Frmd4b(0.14), Carmil2(0.13), Fscn1(0.12), Fscn1(0.…
positive regulation of inflammatory response	0.00436101	0.223104	1.58499e-06	1.18305e-05	53	0.304751	0.0934221	0.00760398	0.00249349	0.000399829	Tnfsf18(0.92), Ccl11(0.83), Ccl6(0.82), S100a9(0.76), S100a8(0.74), Adam8(0.71), Ccl7(0.56), Ptger4(0.55), Tlr4(0.55), Serpine1(0.52), Il1rl1(0.51), Fabp4(0.48), Ednra(0.48), Itga2(0.44), Ager(0.42), Il33(0.42), Ets1(0.41), Cd47(0.35), Jak2(0.31), Pla2g4a(0.27), Ccl2(0.27), Gpsm3(0.26), Egfr(0.25), Cdk19(0.23), Pde2a(0.2), Ccl4(0.18), Tlr2(0.14), Il17ra(0.13), Gprc5b(0.13), Stat5a(0.1), Ctss(0.09…
positive regulation of Wnt signaling pathway	0.0102073	0.243484	1.59712e-06	1.1896e-05	35	0.07826	0.0605836	0.0228282	0.00792866	0.0011911	Sox4(0.54), Sulf1(0.52), Macf1(0.44), Macf1(0.44), Dact1(0.4), Bmp2(0.34), Fgfr2(0.32), Zeb2(0.32), Csnk1e(0.32), Hhex(0.31), Zranb1(0.26), Zranb1(0.26), Kank1(0.25), Dixdc1(0.24), Spin1(0.19), Sulf2(0.15), Tlr2(0.14), Csnk1d(0.12), Cdc73(0.12), Mbd2(0.04), Atp6v0c(0.02), Sfrp1(0.02), Atp6ap2(0.01), Wls(-0.03), Wls(-0.03), Smarca4(-0.04), Smarca4(-0.04), Sall1(-0.04), Ppm1a(-0.05), Atp6v1c2(-0.07…
neuronal cell body membrane	0.0112871	0.343442	1.64736e-06	1.22445e-05	18	0.0286236	0.00429515	0.000877573	0.0652029	0.10926	Kcnc2(0.86), Kcnc2(0.86), Il6ra(0.54), Unc5a(0.48), Adrb2(0.47), Slc4a8(0.32), Dab2ip(0.3), Atp2b2(0.21), Il6st(0.21), Atp2b1(0.19), Flrt1(0.18), Ngfr(0.14), Aqp1(0.08), Kcnb1(0.06), Kcnb1(0.06), Kcnc3(-0.18), Amigo1(-0.18), Cx3cr1(-1.05),
ubiquitin protein ligase binding	0.0100771	0.0951695	1.66884e-06	1.23706e-05	277	0.000194829	0.0157627	0.156167	0.0482671	0.021404	Hspa1a(1.41), Cxcr4(0.86), Nkd2(0.68), Dio2(0.66), Asb4(0.61), Ptpn22(0.52), Trib1(0.51), Herc2(0.48), Abtb2(0.48), Per1(0.45), Hspa1l(0.44), Dnaja1(0.44), Fzd5(0.43), Smad7(0.41), Smad3(0.4), Per3(0.4), Tgfbr1(0.39), Ggn(0.38), Mid1(0.37), Tmem173(0.37), Egr2(0.36), Smad6(0.36), Kcnh2(0.35), Traf1(0.35), Hif1a(0.34), Nfkbia(0.33), Pml(0.32), Txnip(0.32), Asb15(0.3), Clu(0.29), Fzd4(0.29), Cbs(0.…
negative regulation of G1/S transition of mitotic cell cycle	0.0167279	0.282861	1.67133e-06	1.23706e-05	25	0.00708274	0.0370887	0.0178607	0.0278467	0.0160799	E2f7(0.85), Slfn1(0.59), Slfn1(0.59), Dact1(0.4), Cdkn2b(0.39), Pkd2(0.3), Ctdsp2(0.27), Bcl2(0.24), Bcl2(0.24), Ctdspl(0.23), Jade1(0.22), Zfp655(0.2), Cdkn1a(0.15), Rb1(0.15), Ezh2(0.12), Cdc73(0.12), Kank2(0.12), Fhl1(0.04), Pten(0.02), Prmt2(-0.01), Ctdsp1(-0.01), Ppp2r3d(-0.03), Fbxo7(-0.06), Brd7(-0.11), Gsg2(-0.13),
metalloendopeptidase activity	0.00664097	0.177148	1.6977e-06	1.25396e-05	80	0.146811	0.0285229	0.00722552	0.00645722	0.0061725	Mmp8(1.13), Adamts4(0.97), Mmp25(0.83), Papln(0.74), Adam8(0.71), Mmp3(0.65), Mmp9(0.59), Mmp9(0.59), Adamts1(0.57), Adamts1(0.57), Adamts1(0.57), Mmp19(0.57), Thsd4(0.57), Tll1(0.5), Mmp14(0.45), Adam22(0.44), Mmp7(0.43), Adamts15(0.4), Adam19(0.39), Adamts2(0.38), Adamts5(0.37), Ece1(0.37), Adamts7(0.3), Adamtsl2(0.29), Adamtsl4(0.29), Mmp17(0.25), Adamts10(0.24), Trabd2b(0.23), Bmp1(0.22), Bmp…
B cell differentiation	0.00627065	0.246451	1.70406e-06	1.25603e-05	35	0.223938	0.018374	0.0456683	0.0137003	0.000134283	Adgrg3(0.53), Nfam1(0.53), Tshr(0.39), Lyl1(0.38), Gimap1(0.37), Ep300(0.33), Hhex(0.31), Ptprc(0.31), Jak3(0.29), Ahr(0.28), Flt3(0.26), Flt3(0.26), Bcl6(0.25), Bcl2(0.24), Hdac5(0.22), Hdac7(0.2), Pik3r1(0.19), Polm(0.19), Dclre1c(0.19), Clcf1(0.18), Sp3(0.17), Cebpg(0.14), Ikzf1(0.14), Ptpn2(0.11), Gon4l(0.11), Plcg2(0.1), Adam17(0.09), Zbtb1(0.03), Rbpj(-0.05), Nhej1(-0.12), Nhej1(-0.12), Vpr…
branching involved in salivary gland morphogenesis	0.0134814	0.395234	1.7301e-06	1.26752e-05	13	0.0157747	0.0351415	0.00582385	0.0886963	0.0054341	Il6(1.24), Il6(1.24), Pdgfb(0.45), Lama5(0.42), Fgfr1(0.36), Fgfr2(0.32), Lama1(0.32), Fgf7(0.24), Esrp1(0.19), Dag1(0.1), Bmp7(0.07), Tgm2(-0.05), Esrp2(-0.08),
multicellular organism growth	0.014536	0.142802	1.73402e-06	1.26752e-05	99	0.0247009	0.04445	0.0115923	0.0151101	0.0114955	Meg3(0.59), G6pc(0.58), Arid5b(0.54), Heg1(0.43), Tns2(0.42), Pcnt(0.41), Stil(0.39), Rc3h2(0.35), Rarb(0.34), Pde4d(0.33), Zfp36l1(0.32), Fgfr2(0.32), Hhex(0.31), Kmt2c(0.31), Mfsd7b(0.3), Ercc1(0.29), Ercc1(0.29), Atrx(0.29), Grhl2(0.29), Notch2(0.28), Stk40(0.28), Klf2(0.27), Rarg(0.27), Ppp1r13l(0.27), Ankrd11(0.26), Clic4(0.25), Kdm2a(0.25), Ncoa3(0.24), Tcf7l2(0.23), Ercc6(0.23), Kdm6a(0.22…
positive regulation of bone mineralization	0.00550053	0.281824	1.73411e-06	1.26752e-05	30	0.351072	0.00744779	0.00468531	0.001752	0.0205644	Tfap2a(0.49), Adrb2(0.47), Smad3(0.4), Osr2(0.36), Bmp2(0.34), Gpm6b(0.34), Cd276(0.34), Bmpr2(0.32), P2rx7(0.32), Kl(0.27), Mef2c(0.26), Acvr2b(0.22), Ano6(0.22), Ano6(0.22), Tmem119(0.22), Tmem119(0.22), Bmpr1b(0.18), Acvr1(0.14), Fgfr3(0.12), Acvr2a(0.1), Pkdcc(0.09), Osr1(0.08), Bmp7(0.07), Bmp4(0.01), Bmpr1a(0.01), Slc8a1(0.01), Fam20c(-0.05), Atraid(-0.22), Bmp6(-0.24), Wnt4(-0.5),
response to drug	0.0138361	0.13329	1.73494e-06	1.26752e-05	114	0.0176798	0.0406359	0.00701976	0.0405288	0.00993372	Inhba(1.17), Fos(0.83), Cyp27b1(0.69), Drd1(0.69), Drd1(0.69), Jun(0.69), Htr1b(0.65), Mmp9(0.59), Cd38(0.52), Ncam1(0.52), Kdr(0.51), Junb(0.5), Lcn2(0.45), Lyst(0.44), Gata6(0.43), Mmp7(0.43), Pde3a(0.43), Sfrp2(0.4), Ptprm(0.38), Ep300(0.33), P2rx7(0.32), Usp47(0.29), Usp47(0.29), Ren1(0.28), Hdac4(0.27), Smad1(0.26), Bcl2(0.24), Bcl2(0.24), Abcc1(0.24), Cyp2d26(0.24), Npc1(0.23), Tgfb2(0.23),…
phosphatidylinositol 3-kinase complex	0.0128634	0.34608	1.73755e-06	1.26752e-05	17	0.0992072	0.00732127	0.0330454	0.0124437	0.00510831	Pik3c2g(0.52), Pik3r5(0.3), Pik3r5(0.3), Pik3ca(0.28), Pik3ca(0.28), Pik3cd(0.24), Pik3cg(0.22), Pik3cg(0.22), Pik3r1(0.19), Pik3r1(0.19), Pik3cb(0.18), Pik3cb(0.18), Pik3r3(0.09), Pik3c2b(0.09), Pik3c2a(0.05), Pik3r2(-0.13), Pik3r2(-0.13),
3',5'-cyclic-nucleotide phosphodiesterase activity	0.00805797	0.35487	1.75524e-06	1.27779e-05	18	0.0402246	0.114376	0.000794104	0.00812795	0.0315123	Pde1c(0.62), Pde10a(0.52), Pde6a(0.47), Pde3a(0.43), Pde4d(0.33), Pde3b(0.29), Pde8b(0.28), Pde7b(0.23), Pde9a(0.22), Pde2a(0.2), Pde7a(0.19), Pde4c(0.17), Pde1a(0.14), Pde8a(0.12), Pde4a(0.1), Pde1b(0.09), Pde5a(-0.16), Pde6d(-0.18),
cAMP biosynthetic process	0.00752627	0.354427	1.83125e-06	1.33038e-05	19	0.250336	0.00673286	0.00204049	0.0112245	0.0200316	Adcy1(0.48), Adcy1(0.48), Calcrl(0.32), Adcy3(0.29), Adcy3(0.29), Adcy3(0.29), Adcy4(0.28), Adcy4(0.28), Adcy9(0.19), Adcy9(0.19), Ucn2(0.16), Adcy5(0.1), Adcy5(0.1), Adcy6(0.09), Adcy6(0.09), Adcy7(0.01), Adcy7(0.01), Ramp2(-0.04), Adm(-0.15),
collagen fibril organization	0.00264108	0.291796	1.87841e-06	1.36184e-05	39	0.433799	0.0100748	0.00319945	0.00143666	0.0160713	Col11a2(0.83), Col11a2(0.83), Lox(0.44), Lox(0.44), Lmx1b(0.4), Sfrp2(0.4), Tgfbr1(0.39), Ddr2(0.38), Adamts2(0.38), Col5a2(0.37), Col5a2(0.37), Tnxb(0.33), Foxc1(0.32), Nf1(0.29), Col3a1(0.27), Col3a1(0.27), Cyp1b1(0.24), Loxl2(0.24), Tgfb2(0.23), Atp7a(0.17), Adamts14(0.14), Col14a1(0.12), Lum(0.08), Serpinh1(0.02), Foxc2(0.02), Anxa2(0.01), Col5a1(-0.04), Col5a1(-0.04), Col5a1(-0.04), Mmp11(-0…
DNA methylation	0.0136475	0.262855	1.93375e-06	1.3991e-05	29	0.132514	0.0159786	0.0299724	0.00437404	0.00516571	Meg3(0.59), Meg3(0.59), Kmt2a(0.53), Dnmt3l(0.43), Dnmt3l(0.43), Kmt2e(0.38), Dnmt3a(0.29), Dnmt3a(0.29), Dnmt3a(0.29), Dnmt3b(0.21), Dnmt3b(0.21), Baz2a(0.21), Gatad2b(0.21), Mbd4(0.2), Gnas(0.19), Atf7ip(0.19), Dnmt1(0.16), Dnmt1(0.16), Ezh2(0.12), Mta2(0.07), Ehmt1(0.03), Bmi1(-0.01), Ctcf(-0.01), Ctcf(-0.01), Ehmt2(-0.08), Gatad2a(-0.08), Hells(-0.12), Bend3(-0.18), Mtrr(-0.46),
brush border	0.00463674	0.182289	1.9771e-06	1.42752e-05	80	3.77187e-05	0.00446325	0.00241688	0.668384	0.086764	Slc9a3(0.73), Rapgef4(0.63), Itpr3(0.62), Plec(0.56), Slc38a2(0.48), Flna(0.42), Flnb(0.41), Myh9(0.39), Myo1b(0.39), Myo1b(0.39), Soat2(0.39), Slc34a3(0.36), Myo1e(0.3), Coro2a(0.3), Actn1(0.24), Slc34a1(0.23), Lima1(0.22), Lrp2(0.21), Lrp2(0.21), Myh10(0.21), Myo15b(0.2), Myh11(0.19), Myo6(0.19), Diaph1(0.18), Flii(0.17), Myo1d(0.17), Myo1d(0.17), Enpep(0.14), Ralgds(0.14), Lctl(0.14), Cubn(0.1…
negative regulation of sequence-specific DNA binding transcription factor activity	0.0165725	0.180565	1.99353e-06	1.43356e-05	61	0.00550282	0.0196413	0.0094764	0.0659305	0.0317357	Pim1(0.63), Hr(0.61), Twist1(0.57), Trib1(0.51), Trib1(0.51), Bhlhe40(0.43), Flna(0.42), Smad7(0.41), Sirt1(0.4), Sirt1(0.4), Id3(0.39), Esr1(0.37), Prox1(0.36), Igf1r(0.33), Id1(0.32), Kat6a(0.31), Klf4(0.3), Foxs1(0.29), Rlim(0.29), Ddit3(0.27), Hdac4(0.27), Tcf7l2(0.23), Hmox1(0.21), Trib2(0.21), Kdm1a(0.17), Sfrp4(0.16), Ptch1(0.15), Cebpg(0.14), Ezh2(0.12), Rnf2(0.11), Irak2(0.11), Wwp2(0.1)…
regulation of cell differentiation	0.0155624	0.249277	2.01501e-06	1.44607e-05	32	0.0423822	0.0882947	0.00630034	0.0276306	0.00239226	Lif(1.22), Chd5(1.05), Socs3(0.85), Socs3(0.85), Tfap2a(0.49), Spry2(0.44), Gli3(0.43), Fes(0.41), Apc(0.35), Apc2(0.34), Klf4(0.3), Sik1(0.28), Stk26(0.28), Runx3(0.27), Sox17(0.22), Ptbp3(0.18), Dicer1(0.16), Plekhb1(0.14), Stk24(0.12), Tfap2b(0.06), Birc2(0.05), Sox9(0.04), Plekhb2(0.04), Ctnnb1(0.03), Bmp4(0.01), Bmp4(0.01), Cela1(-0.03), Eid1(-0.1), St7l(-0.18), Hmgb2(-0.22), Nrg1(-0.26), Ih…
chromatin DNA binding	0.012747	0.211247	2.13366e-06	1.52812e-05	45	0.0611842	0.0278715	0.00894295	0.0271616	0.00568546	Jmjd1c(0.68), Notch1(0.64), Hr(0.61), Per1(0.45), Smad3(0.4), Ep300(0.33), Ep300(0.33), Grhl2(0.29), Bcl6(0.25), Mecp2(0.24), Kdm3a(0.24), Grhl1(0.23), Kdm6a(0.22), Rela(0.21), Stat3(0.21), Kdm5a(0.18), Kdm3b(0.18), Srf(0.16), Actn4(0.16), Rara(0.14), Top1(0.13), Ezh2(0.12), Ezh2(0.12), Foxo3(0.1), Ppargc1a(0.09), H1f0(0.08), Nkap(0.08), Rxra(0.07), H2afz(0.07), Med1(0.05), Foxc2(0.02), Foxc2(0.0…
protein localization to plasma membrane	0.00917518	0.204076	2.14985e-06	1.5366e-05	55	0.0869998	0.0719555	0.00626928	0.00113417	0.0282193	Tnik(0.47), Ramp3(0.4), Cdh1(0.38), Emp2(0.38), Lrp6(0.38), Rapgef2(0.36), Sytl2(0.34), Calcr(0.32), Kcnip4(0.3), Dchs1(0.25), Skap1(0.22), Epb41l3(0.2), Stxbp1(0.2), Cacnb3(0.19), Plekhf1(0.19), Fcer1g(0.17), Map7(0.17), Bag4(0.16), Ehd2(0.15), Dennd4c(0.15), Rapgef6(0.14), Rap2a(0.11), Fcho2(0.1), Zfyve27(0.1), Myo5a(0.09), Rab11a(0.09), C2cd5(0.08), C2cd5(0.08), Cln3(0.07), Fyb(0.07), Ank3(0.0…
stem cell population maintenance	0.0137666	0.186077	2.20386e-06	1.57203e-05	58	0.000737039	0.00877072	0.0536487	0.0468119	0.0771911	Lif(1.22), Lif(1.22), Fgfr1(0.36), Apc(0.35), Tbx3(0.35), Ddx6(0.34), Zcchc11(0.31), Klf4(0.3), Nipbl(0.29), Med12(0.23), Stat3(0.21), Smc3(0.18), Rif1(0.18), Mtf2(0.17), Dicer1(0.16), Smc1a(0.15), Rtf1(0.14), Rtf1(0.14), Setd1a(0.14), Tet1(0.12), Prdm16(0.12), Prdm16(0.12), Cdc73(0.12), Med14(0.1), Trim8(0.1), Stag2(0.09), Eif4enif1(0.09), Med15(0.09), Nkap(0.08), Ctnnb1(0.03), Fzd7(0.03), Bmpr1…
positive regulation of urine volume	0.0101989	0.446564	2.24403e-06	1.59746e-05	11	0.345199	0.0113598	0.00240112	0.00163316	0.0343949	Nppb(1.3), Ptger4(0.55), Edn1(0.53), Edn1(0.53), Ednrb(0.5), Adora2a(0.19), Ptger3(0.17), Btc(0.16), Npr3(0.11), Inpp5k(0.1), Tfap2b(0.06),
regulation of neurogenesis	0.0110891	0.316346	2.3103e-06	1.64133e-05	20	0.105669	0.0189215	0.0101979	0.0392912	0.0022576	Notch1(0.64), Chd7(0.59), Bcl6b(0.46), Dll1(0.45), Dll4(0.44), Per2(0.21), Dock7(0.19), Kdm1a(0.17), Jade2(0.16), Dicer1(0.16), Ezh2(0.12), Hes1(0.12), Yap1(0.12), Arntl(0.1), Hoxb3(0.08), Zfp335(0.07), Nos1(0.01), Nf2(-0.04), Hmgb2(-0.22), Eomes(-0.35),
cytokine binding	0.0147809	0.308598	2.32372e-06	1.64756e-05	21	0.0767053	0.00496016	0.00736409	0.0163771	0.0483402	Nog(0.96), Cxcr4(0.86), Cntfr(0.62), Cd44(0.49), Osmr(0.49), Il31ra(0.4), Fzd4(0.29), Fzd4(0.29), Tnfrsf11a(0.23), Lifr(0.19), Kit(0.17), Csf1r(0.12), Csf1r(0.12), Csf1r(0.12), Tnfrsf9(0.11), Crlf1(0.01), Cd74(-0.09), Cd74(-0.09), Ccr2(-0.1), Ifngr1(-0.13), Park7(-0.2),
calcium channel activity	0.00911214	0.198895	2.33014e-06	1.64881e-05	58	0.182406	0.0174199	0.0117897	0.000485698	0.0483483	Trpm6(0.83), Ryr1(0.74), Cacna2d2(0.66), Itpr3(0.62), Cacna2d1(0.55), Cacna1c(0.5), Cacna1h(0.45), Slc24a3(0.43), Trpm2(0.39), Pkd1l3(0.36), Pkd2(0.3), Pkd2(0.3), Cacnb1(0.26), Itpr2(0.26), Pkd1(0.25), Pkd1(0.25), Catsper2(0.25), Tpcn2(0.25), Dennd5a(0.23), Trpc1(0.23), Cacng7(0.23), Dennd5b(0.21), Cacnb3(0.19), Trpm4(0.11), Trpv6(0.1), Trpv6(0.1), Trpv6(0.1), Cacna1d(0.09), Cacnb4(0.08), Trpm7(0…
Roundabout signaling pathway	0.0133042	0.449735	2.38446e-06	1.68388e-05	10	0.033907	0.0376341	0.0184247	0.00703559	0.0186981	Slit3(0.56), Slit3(0.56), Robo3(0.36), Slit2(0.31), Slit2(0.31), Robo1(0.28), Myo9b(0.26), Robo2(0.17), Rhoa(-0.05), Tpbgl(-0.25),
negative regulation of smooth muscle cell proliferation	0.00537717	0.276435	2.50546e-06	1.7658e-05	32	0.194574	0.0456578	0.000501688	0.00138792	0.0845066	Nppb(1.3), Ang(0.64), Igfbp3(0.55), Tnfaip3(0.54), Nos3(0.51), Trib1(0.51), Ptgir(0.41), Ptgir(0.41), Esr1(0.37), Apod(0.32), Ndrg4(0.31), Il15(0.3), Klf4(0.3), Igfbp5(0.28), Pparg(0.23), Ndrg2(0.23), Hmox1(0.21), Pik3r1(0.19), Cav1(0.16), Ppard(0.16), Sf1(0.13), Npr3(0.11), Npr1(0.1), Ppargc1a(0.09), Ralbp1(0.04), Mfn2(0.01), Ctnnbip1(-0.13), Ace2(-0.42), Trp53(-0.49), Comt(-0.51), Aif1(-0.65), …
detection of mechanical stimulus	0.0155881	0.42257	2.52059e-06	1.77294e-05	11	0.0312866	0.0249226	0.00950301	0.0221208	0.0215563	Ano3(0.44), Pkd1l3(0.36), Pkd2(0.3), Pkd1(0.25), Pkd1(0.25), Dennd5a(0.23), Dennd5b(0.21), Jup(0.19), Piezo1(0.15), Pkd2l2(0.01), Pkdrej(0),
negative regulation of cAMP biosynthetic process	0.00926677	0.37387	2.5645e-06	1.80024e-05	16	0.180791	0.0767402	0.00347099	0.00641138	0.0038237	Htr1b(0.65), Htr1b(0.65), Edn1(0.53), Edn1(0.53), Ednra(0.48), Akap6(0.44), Pde2a(0.2), Pde2a(0.2), Ptger3(0.17), Nucb2(0.15), Aplp1(0.14), Lpar1(0.14), Grm7(0.08), Adra2a(-0.03), Galr3(-0.09), Palm(-0.22),
bone development	0.0109418	0.207552	2.58845e-06	1.81346e-05	47	0.142609	0.0369242	0.00028247	0.0432685	0.014899	Stc1(0.69), Sh3pxd2b(0.57), Sh3pxd2b(0.57), Ptger4(0.55), Sulf1(0.52), Akap13(0.48), Mmp14(0.45), Rarb(0.34), Fgfr2(0.32), Pls3(0.3), Pdgfa(0.28), Rarg(0.27), Rarg(0.27), Smad1(0.26), Ankrd11(0.26), Asxl1(0.24), Gnas(0.19), Trip11(0.19), Papss2(0.18), Smad9(0.17), Npr2(0.16), Bbx(0.15), Sulf2(0.15), Rara(0.14), Fgfr3(0.12), Whsc1(0.1), Sparc(0.09), Ift172(0.06), Lrp5(0.05), Tulp3(0.03), Pdgfc(0.0…
membrane tubulation	0.0168093	0.373657	2.61999e-06	1.83192e-05	14	0.0133472	0.021854	0.0126863	0.0185055	0.0514453	Sgip1(0.75), Micall1(0.3), Pacsin3(0.27), Pacsin3(0.27), Snx33(0.23), Whamm(0.17), Bin2(0.17), Ehd2(0.15), Wasl(0.14), Pacsin1(0.1), Pacsin1(0.1), Pacsin2(0.07), Pacsin2(0.07), Snx9(0.02),
positive regulation of cell division	0.0113697	0.241149	2.66422e-06	1.85918e-05	36	0.148023	0.0888165	0.0122793	0.00143485	0.00531517	Ereg(0.79), Prok1(0.74), Il1b(0.69), Pgf(0.69), Fgf1(0.45), Pdgfb(0.45), Ptn(0.36), Apc(0.35), Tal1(0.35), Thbs4(0.35), Fgfr2(0.32), Fgf2(0.31), Tgfa(0.3), Tgfb3(0.3), Vegfa(0.29), Pdgfa(0.28), Tgfb1(0.28), Fgf7(0.24), Tgfb2(0.23), Garem1(0.2), Btc(0.16), Igf2(0.16), Fgf9(0.12), Nkx3-1(0.09), Pdgfd(0.04), Pdgfc(0.03), Cspp1(0), Men1(-0.06), Ybx1(-0.08), Sirt2(-0.08), Vegfb(-0.15), Cat(-0.18), Veg…
regulation of cell-cell adhesion	0.00511502	0.426798	2.68466e-06	1.86975e-05	14	0.341156	0.0584312	0.00174362	0.000834425	0.0165223	Adam8(0.71), Ephb3(0.69), Efna5(0.46), Efna5(0.46), Podxl(0.37), Nrarp(0.37), Nrarp(0.37), Cd24a(0.34), Src(0.26), Itgal(0.24), Celsr2(0.09), Mink1(0.03), Epha7(-0.07), Wnt4(-0.5),
cortical actin cytoskeleton	0.00884927	0.236942	2.71258e-06	1.8827e-05	42	0.0214378	0.124256	0.0175844	0.0214596	0.0021247	Gys2(0.66), Utrn(0.5), Myrip(0.5), Cldn5(0.49), Akap13(0.48), Dlc1(0.46), Cdh1(0.38), Gsn(0.28), Scnn1a(0.27), Ppp1r9b(0.27), Slc2a1(0.26), Shroom4(0.25), Actn1(0.24), Rapgef3(0.21), Cdh2(0.15), Coro1a(0.15), Shroom2(0.14), Shroom2(0.14), Myadm(0.12), Myzap(0.09), Flot2(0.08), Cap2(0.08), Ppp1r9a(0.08), Mtss1l(0.08), Lasp1(0.07), Plekhh2(0.03), Cap1(0.02), Llgl1(0.01), Llgl1(0.01), Dstn(0), Lancl…
positive regulation of p38MAPK cascade	0.0124016	0.392642	2.7139e-06	1.8827e-05	13	0.0189855	0.0298	0.00445813	0.123132	0.00744656	Gadd45b(0.65), Gadd45a(0.55), Zc3h12a(0.46), Map3k5(0.35), Bmp2(0.34), Gadd45g(0.32), Vegfa(0.29), Map3k3(0.24), Xdh(0.16), Sash1(0.11), Met(0.1), Map3k4(0.04), Gdf6(-0.31),
regulation of mRNA stability	0.0169582	0.291354	2.76185e-06	1.91222e-05	23	0.0195713	0.0311748	0.021313	0.0307193	0.00974092	Rnasel(0.8), Zfp36(0.37), Zfp36(0.37), Rc3h1(0.33), Zfp36l1(0.32), Zfp36l1(0.32), Zfp36l1(0.32), Calcr(0.32), Samd4(0.31), Zfp36l2(0.18), Zfp36l2(0.18), Brf1(0.15), Carhsp1(0.13), Pum2(0.12), Fmr1(0.07), Pum1(0.07), Hnrnpd(0.03), Ythdf2(0), Pcbp4(-0.02), Pcid2(-0.05), Zc3h14(-0.08), Pabpc4(-0.19), Apex1(-0.61),
vascular endothelial growth factor receptor signaling pathway	0.0117996	0.270746	2.80812e-06	1.94046e-05	29	0.236848	0.0232081	0.0064482	0.0323532	0.000933688	Pgf(0.69), Sulf1(0.52), Kdr(0.51), Kdr(0.51), Flt1(0.5), Flt1(0.5), Flt1(0.5), Flt4(0.38), Bmpr2(0.32), Foxc1(0.32), Vegfa(0.29), Vegfa(0.29), Prkd2(0.29), Ccl2(0.27), Prkd1(0.18), Ptk2b(0.12), Ptk2b(0.12), Bcar1(0.03), Foxc2(0.02), Mapk14(0), Mapkapk2(-0.03), Mapkapk2(-0.03), Vegfb(-0.15), Vegfc(-0.18), Vegfc(-0.18), Nrp1(-0.19), Nrp1(-0.19), Vegfd(-0.28), Vegfd(-0.28),
scaffold protein binding	0.00992936	0.211655	2.84698e-06	1.96348e-05	47	0.0425409	0.184579	0.00116886	0.00657938	0.0225877	Trem1(1.06), Gja1(0.63), Shank3(0.61), Shank3(0.61), Cit(0.6), Nos3(0.51), Nos3(0.51), Dsp(0.5), Dll1(0.45), Cacna1h(0.45), Casp4(0.43), Kcna5(0.4), Kcnh2(0.35), Krt18(0.3), Src(0.26), Src(0.26), Nck2(0.24), Cacna1g(0.22), Homer1(0.21), Xiap(0.18), Cav2(0.16), Vim(0.16), Kcnq1(0.14), Dlg4(0.1), Adcy5(0.1), Adcy6(0.09), Mdm2(0.07), Krt8(0.01), Nos1(0.01), Ikbkb(0), Casp1(-0.02), Chuk(-0.02), Map3k…
early endosome	0.0140741	0.104189	2.87962e-06	1.98212e-05	185	0.0298112	0.0461433	0.0251589	0.00777477	0.0140083	Cxcr4(0.86), Havcr2(0.71), Gja1(0.63), Trf(0.61), Trf(0.61), Kdr(0.51), Ret(0.51), Vcam1(0.47), Epha3(0.46), Dysf(0.45), Fzd5(0.43), Myo1b(0.39), Lrp6(0.38), Lrp6(0.38), Ece1(0.37), Sorl1(0.36), Aoc3(0.3), P2ry2(0.28), Wdfy2(0.27), F2rl1(0.23), Rabgef1(0.23), Wasf2(0.23), Numb(0.21), Ldlrap1(0.21), Ldlrap1(0.21), Fam109a(0.21), Ptpn1(0.19), Ptpn1(0.19), Snx16(0.18), Snx16(0.18), Rab31(0.18), Ocrl…
E-box binding	0.0103169	0.249847	2.95531e-06	2.03027e-05	33	0.262316	0.0524555	0.0136545	0.0197408	0.000156388	Ciart(0.85), Bhlhe41(0.74), Twist1(0.57), Twist1(0.57), Twist1(0.57), Per1(0.45), Bhlhe40(0.43), Bhlhe40(0.43), Zeb1(0.4), Tal1(0.35), Tal1(0.35), Tcf4(0.35), Ahr(0.28), Tcf21(0.22), Gata3(0.18), Srebf2(0.16), Arntl2(0.13), Arntl2(0.13), Hes1(0.12), Arntl(0.1), Arntl(0.1), Tcf12(0.07), Clock(-0.02), Clock(-0.02), Lmo2(-0.03), Tcf3(-0.05), Tcf3(-0.05), Atoh8(-0.07), Scx(-0.14), Scx(-0.14), Tfap4(-…
positive regulation of transforming growth factor beta receptor signaling pathway	0.0121611	0.255706	2.98715e-06	2.04816e-05	31	0.0227051	0.00364259	0.0769494	0.0205912	0.0243387	Thbs1(0.72), Thbs1(0.72), Hipk2(0.42), Cdkn2b(0.39), Itga8(0.39), Itga8(0.39), Myocd(0.37), Tgfbr3(0.33), Tgfbr3(0.33), Cited2(0.27), Tgfb1i1(0.22), Flcn(0.22), Flcn(0.22), Rnf111(0.2), Rnf111(0.2), Furin(0.15), Adam17(0.09), Sdcbp(0.06), Smad4(0.05), Ing2(0.03), Stk11(0.02), Stk11(0.02), Axin1(0.01), Axin1(0.01), Axin1(0.01), Snw1(-0.04), Men1(-0.06), Dab2(-0.08), Lrg1(-0.09), Npnt(-0.12), Gipc1…
chemokine receptor activity	0.0110475	0.485024	3.03124e-06	2.07438e-05	10	0.0357368	0.0420493	0.0496555	0.0162371	0.00255634	Cxcr2(1.09), Cxcr2(1.09), Cxcr4(0.86), Ackr4(0.61), Ccr1(0.6), Ackr2(0.59), Ccrl2(0.15), Ccr5(0.04), Ccr2(-0.1), Ccr7(-0.23),
positive regulation of cytosolic calcium ion concentration involved in phospholipase C-activating G-protein coupled signaling pathway	0.00900442	0.407314	3.28822e-06	2.24589e-05	14	0.33187	0.0540388	0.00109446	0.00539495	0.00768681	P2ry10(1.06), Drd1(0.69), S1pr1(0.59), Edn1(0.53), Ednra(0.48), Gpr4(0.41), Gpr17(0.36), Plcd1(0.3), Agtr1a(0.17), F2r(0.17), Lpar1(0.14), Lpar3(0.12), Tgm2(-0.05), Lpar6(-0.14),
ARF guanyl-nucleotide exchange factor activity	0.0160837	0.303875	3.34394e-06	2.27955e-05	21	0.0168667	0.00753898	0.033572	0.02796	0.0380508	Arfgef3(0.57), Psd3(0.53), Fnbp1l(0.29), Cyth1(0.26), Cyth1(0.26), Nck2(0.24), Cyth3(0.16), Fnbp1(0.12), Cyth4(0.12), Gbf1(0.11), Psd(0.1), Iqsec1(0.09), Iqsec2(0.09), Trip10(0.08), Cyth2(0.01), Arfgef1(0), Arfgef2(-0.01), Arfgef2(-0.01), Nck1(-0.05), Psd4(-0.08), Fbxo8(-0.1),
regulation of blood pressure	0.0062327	0.223863	3.38297e-06	2.30172e-05	48	0.164421	0.0234548	0.00172657	0.00729662	0.0414363	Ptgs2(1.16), Edn1(0.53), Edn1(0.53), Corin(0.53), Corin(0.53), Cacna1c(0.5), Ednrb(0.5), Ednrb(0.5), Npy(0.48), Cyp4f18(0.47), Dll1(0.45), Ece1(0.37), Atp1a2(0.35), Lnpep(0.33), Ptgs1(0.31), Aoc3(0.3), Ahr(0.28), Ren1(0.28), Pparg(0.23), Tac1(0.22), Hmox1(0.21), Gucy1a3(0.16), P2rx1(0.15), Enpep(0.14), Gch1(0.13), Gch1(0.13), Acvrl1(0.11), Cd34(0.11), Npr3(0.11), Npr3(0.11), Lrp5(0.05), Acta2(0.0…
retina development in camera-type eye	0.0146917	0.2028	3.46043e-06	2.3499e-05	48	0.127324	0.062317	0.00165218	0.0060989	0.0265208	Lif(1.22), Ntrk2(0.94), Tub(0.7), Chd7(0.59), Pde6a(0.47), Dll1(0.45), Pdgfb(0.45), Lamb2(0.36), Apc(0.35), Rarb(0.34), Lama1(0.32), Mertk(0.3), Tgif1(0.28), Rarg(0.27), Ski(0.24), Ahi1(0.23), Myh10(0.21), Cep290(0.2), Bmpr1b(0.18), Jmjd6(0.17), Lhx1(0.16), Ikzf1(0.14), Rpl24(0.13), Zfp513(0.13), Lamc3(0.12), Rpgrip1(0.12), Mdm1(0.08), Clcn2(0.06), Calb1(0.05), Lpcat1(0.05), Gnb1(0.04), Sox9(0.04…
cadherin binding	0.0163988	0.283684	3.49558e-06	2.36923e-05	25	0.085685	0.0339474	0.0230564	0.00487721	0.0114081	Cdk5r1(0.59), Nos3(0.51), Nos2(0.45), Ptprm(0.38), Cdh13(0.3), Cd46(0.3), Fxyd5(0.27), Ctnna1(0.25), Numb(0.21), Jup(0.19), Jup(0.19), Ctnnal1(0.17), Ctnnd1(0.16), Tbc1d2(0.15), Fer(0.07), Ank3(0.06), Cd2ap(0.04), Ctnnb1(0.03), Ctnnb1(0.03), Neo1(-0.02), Psen1(-0.02), Ndrg1(-0.08), Prom1(-0.09), Olfm4(-0.26), P2rx4(-0.32),
Ras guanyl-nucleotide exchange factor activity	0.0185233	0.417541	3.59247e-06	2.43024e-05	11	0.0591025	0.0465614	0.0274323	0.00367669	0.0141205	Rapgef4(0.63), Rasgrp4(0.4), Rapgef2(0.36), Rapgef2(0.36), Rasgef1b(0.33), Rasgrp1(0.18), Rasgrp3(0.12), Sos2(0.08), Adrb1(0.04), Sos1(0.04), Sos1(0.04),
regulation of epithelial cell proliferation	0.00548393	0.449729	3.66178e-06	2.4724e-05	13	0.316164	0.0881787	0.00219223	0.000732826	0.0151683	Pgr(0.66), Notch1(0.64), Ednrb(0.5), Serpinb5(0.5), Ednra(0.48), Hey1(0.43), Smad3(0.4), Fgfr2(0.32), Six4(0.22), Tacstd2(0.22), Hes1(0.12), Frs2(0.1), Hmgn1(-0.19),
negative regulation of smoothened signaling pathway	0.00799279	0.305279	3.70956e-06	2.49989e-05	24	0.252094	0.00110745	0.00468107	0.0642783	0.014837	Gli3(0.43), Gli3(0.43), Serpine2(0.41), Runx2(0.29), Kif7(0.26), Kctd11(0.25), Gpc3(0.17), Gpc3(0.17), Sall3(0.16), Ptch1(0.15), Ptch1(0.15), Ptch1(0.15), Rb1(0.15), Fgfr3(0.12), Ift122(0.08), Sufu(0.05), Sufu(0.05), Wnt7b(0.04), Tulp3(0.03), Tulp3(0.03), Ulk3(0.01), Glis2(-0.01), Gas1(-0.03), Sall1(-0.04),
branching involved in ureteric bud morphogenesis	0.0127896	0.228283	3.717e-06	2.50014e-05	41	0.315379	0.00731681	0.0135874	0.00428428	0.0119187	Gdnf(1.1), Gdnf(1.1), Wnt9b(1), Wnt9b(1), Pgf(0.69), Cd44(0.49), Fat4(0.49), Gli3(0.43), Foxd1(0.42), Lama5(0.42), Bmp2(0.34), Fgf2(0.31), Wt1(0.25), Wt1(0.25), Dchs1(0.25), Bcl2(0.24), Bcl2(0.24), Tcf21(0.22), Timeless(0.22), Gpc3(0.17), Lhx1(0.16), Ptch1(0.15), Hoxd11(0.09), Dlg1(0.06), Smad4(0.05), Pbx1(0.05), Sox9(0.04), Ctnnb1(0.03), Bmp4(0.01), Bmp4(0.01), Hoxa11(-0.04), Sall1(-0.04), Gzf1(…
astrocyte development	0.00635319	0.404406	3.72665e-06	2.50188e-05	14	0.0340388	0.333857	0.00347859	0.00760922	0.00416391	S100a9(0.76), S100a8(0.74), Drd1(0.69), Tlr4(0.55), Dll1(0.45), Ager(0.42), Mt3(0.4), Lamb2(0.36), Tspan2(0.22), Tspan2(0.22), Vim(0.16), Lamc3(0.12), Plp1(-0.14), Eif2b5(-0.21),
response to glucocorticoid	0.0173643	0.282775	3.82464e-06	2.5628e-05	24	0.0467431	0.0307571	0.0519566	0.00922628	0.00663861	Il6(1.24), Il1rn(0.62), Lcat(0.51), Areg(0.37), Calcr(0.32), Acsbg1(0.25), Bcl2(0.24), Bcl2(0.24), Cdo1(0.24), Fas(0.19), Pappa(0.19), Pik3r1(0.19), Adam9(0.18), Pdcd7(0.15), Alpl(0.09), Map2k1(0.09), Sult1a1(0.08), Rxra(0.07), Ass1(0.05), Agl(0.05), Gba(-0.03), Hmgb1(-0.05), Cpn1(-0.11), Tnf(-0.19),
cell communication	0.00990474	0.305106	3.88158e-06	2.59603e-05	23	0.488571	0.00810694	0.00252369	0.0141135	0.00511429	Gja1(0.63), Jag1(0.55), Dll1(0.45), Dll4(0.44), Gjb4(0.43), Adgrv1(0.41), Itgb4(0.4), Gjc1(0.37), Gja5(0.34), Gjb5(0.34), Nf1(0.29), Gja4(0.27), Kremen1(0.14), Ctsl(0.13), Gjb3(0.13), Jag2(0.13), Frem1(0.13), Slc8a1(0.01), Gjb2(-0.01), Fras1(-0.02), Frem2(-0.09), Enpp5(-0.13), Gjb1(-0.33),
actomyosin structure organization	0.00935772	0.282459	3.94424e-06	2.63296e-05	25	0.0137598	0.0363875	0.00651833	0.0160215	0.0859336	Epb41l2(0.39), Myh9(0.39), Frmd6(0.34), Limch1(0.32), Cdc42bpb(0.28), Epb41l4a(0.26), Cdc42bpa(0.22), Myh10(0.21), Epb41l3(0.2), Lurap1(0.15), Cnn2(0.14), Cnn3(0.13), Epb41l4b(0.12), Epb41l4b(0.12), Myh14(0.11), Phactr1(0.1), Phactr1(0.1), Epb41l1(0.09), Trpm7(0.08), F11r(0.07), Epb41l5(0.04), Myo18a(0), Epb41(-0.05), Cnn1(-0.12), Alkbh4(-0.19),
negative regulation of peptidyl-threonine phosphorylation	0.0178281	0.369499	4.00575e-06	2.66848e-05	14	0.0348135	0.0165061	0.0112791	0.0572002	0.014705	Spry2(0.44), Smad7(0.41), Smad7(0.41), Ddit4(0.4), Spred1(0.3), Spred1(0.3), Spred2(0.19), Spred2(0.19), Met(0.1), Inpp5k(0.1), Ogt(-0.04), Pard3(-0.06), Sirt2(-0.08), Dmtn(-0.12),
positive regulation of pri-miRNA transcription from RNA polymerase II promoter	0.0112985	0.326569	4.01253e-06	2.66848e-05	19	0.0577299	0.0476326	0.0135576	0.03844	0.00287557	Fos(0.83), Jun(0.69), Pdgfb(0.45), Smad6(0.36), Bmp2(0.34), Hif1a(0.34), Tgfb1(0.28), Smad1(0.26), Tead1(0.26), Spi1(0.24), Nfkb1(0.21), Stat3(0.21), Srf(0.16), Bmp4(0.01), Bmpr1a(0.01), Ctcf(-0.01), Smarca4(-0.04), Tert(-0.11), Gnl3(-0.5),
pulmonary valve morphogenesis	0.00921759	0.439922	4.03585e-06	2.67896e-05	11	0.373047	0.0161889	0.00162528	0.0334393	0.00306084	Notch1(0.64), Jag1(0.55), Hey1(0.43), Stra6(0.37), Smad6(0.36), Hey2(0.35), Heyl(0.29), Notch2(0.28), Tgfb2(0.23), Nfatc1(0.1), Bmp4(0.01),
synapse assembly	0.0171498	0.252416	4.34212e-06	2.87686e-05	30	0.0890592	0.013762	0.00707337	0.0271118	0.0219022	Clstn3(0.92), Clstn3(0.92), Shank3(0.61), Bsn(0.54), Pdgfb(0.45), Flrt3(0.45), Sdk2(0.42), Cdh1(0.38), Pclo(0.34), Farp1(0.33), Plxnd1(0.32), Pcdhb16(0.31), Mecp2(0.24), Myo6(0.19), Cdh2(0.15), Nrxn2(0.12), Sptbn2(0.06), Cacna1a(0.03), Shank2(0.03), Pten(0.02), Bdnf(-0.01), Nlgn2(-0.03), Agrn(-0.05), Cadm1(-0.05), Gpm6a(-0.07), Cdk5(-0.09), Dbnl(-0.1), Ache(-0.13), Gnpat(-0.21), Nrg1(-0.26),
regulation of microtubule cytoskeleton organization	0.019156	0.315639	4.59409e-06	3.03244e-05	19	0.015672	0.0336758	0.0539944	0.03259	0.0064841	Hsph1(0.63), Cdk5r1(0.59), Efna5(0.46), Epha3(0.46), Phldb2(0.34), Rassf1(0.32), Dixdc1(0.24), Atat1(0.2), Pafah1b1(0.17), Cyld(0.15), Clasp1(0.14), Phldb1(0.12), Camsap3(0.07), Traf3ip1(0.05), Traf3ip1(0.05), Rassf7(-0.02), Agrn(-0.05), Rhoa(-0.05), Kif18a(-0.18),
dephosphorylation	0.0179116	0.147068	4.612e-06	3.03859e-05	89	0.0380344	0.0132476	0.0569706	0.0363749	0.00541522	Dusp10(0.72), Dusp1(0.57), Ptpn22(0.52), Acpp(0.44), Ptprj(0.43), Ptpn14(0.42), Ptpn12(0.39), Ptprb(0.39), Ptprb(0.39), Ptprm(0.38), Dusp14(0.36), Dusp7(0.36), Dusp6(0.35), Dusp5(0.35), Dusp8(0.32), Ptpn13(0.31), Ptprc(0.31), Ptpru(0.26), Ssh2(0.26), Ptprd(0.25), Ptprg(0.25), Ptpn21(0.25), Ssh1(0.24), Ptpn18(0.23), Ptpdc1(0.22), Dusp4(0.22), Dusp16(0.21), Ptpro(0.2), Ptpn1(0.19), Ptp4a3(0.18), Sy…
platelet aggregation	0.0105258	0.26884	4.79381e-06	3.15251e-05	33	0.00370271	0.118925	0.0459315	0.0803919	0.00158407	P2ry12(0.74), Itgb3(0.67), Plek(0.65), Plek(0.65), Flna(0.42), Myh9(0.39), Tln1(0.36), Itga2b(0.31), Pdgfra(0.27), Vcl(0.26), Actg1(0.25), Stxbp1(0.2), Rap2b(0.2), Gnas(0.19), Slc7a11(0.18), Tyro3(0.11), Actb(0.1), Csrp1(0.1), Fermt3(0.1), Fermt3(0.1), Pip5k1c(0.06), Fgg(0.05), Clic1(0.05), Stxbp3(0.03), Fgb(0.03), Ptpn6(-0.06), Hspb1(-0.08), Myl12b(-0.08), Metap1(-0.08), Myl9(-0.11), Bloc1s4(-0.…
cell cortex	0.0162182	0.145041	4.81386e-06	3.15982e-05	91	0.0574199	0.0269094	0.0649956	0.0162175	0.00309839	Ryr1(0.74), Gys2(0.66), Lamc2(0.63), Hmcn2(0.51), Akap13(0.48), Macf1(0.44), Cytip(0.43), Itgb4(0.4), Myh9(0.39), Fry(0.39), Apc(0.35), Ctgf(0.35), Fryl(0.33), Fgfr2(0.32), Fam110c(0.29), Sept5(0.28), Itpr2(0.26), Myo9b(0.26), Usp2(0.25), Clasp2(0.25), Arhgap32(0.25), Tsc1(0.23), Cnksr1(0.23), Myh10(0.21), Myh10(0.21), Pard6b(0.2), Zhx3(0.2), Prkd1(0.18), Pafah1b1(0.17), Pafah1b1(0.17), Cav1(0.16…
negative regulation of platelet aggregation	0.0196198	0.413532	5.0445e-06	3.26214e-05	11	0.0316285	0.0339502	0.0139757	0.0207375	0.0254069	Prkg1(0.72), C1qtnf1(0.52), Adrb2(0.47), Alox12(0.42), Serpine2(0.41), Ceacam1(0.41), Ptger3(0.17), Abat(0.17), Ubash3b(0.16), Prkcd(0.1), Fgg(0.05),
microtubule binding	0.0191139	0.102931	5.06459e-06	3.26214e-05	180	0.105674	0.0556825	0.0309771	0.00580686	0.0041619	S100a9(0.76), Sgip1(0.75), S100a8(0.74), Kif23(0.66), Fam83d(0.65), Map1b(0.51), Eml1(0.48), Map2(0.47), Gas2l3(0.47), Bcl2l11(0.46), Dst(0.46), Macf1(0.44), Ccdc88a(0.43), Eml4(0.42), Mtap7d3(0.42), Fes(0.41), Hdgfrp3(0.39), Mid1(0.37), Stard9(0.36), Apc(0.35), Klc3(0.34), Tiam1(0.31), Nf1(0.29), Ccsap(0.29), Ndel1(0.29), Mtcl1(0.27), Dpysl2(0.26), Kif7(0.26), Map1a(0.26), Spag5(0.26), Ccser2(0.…
cyclic-nucleotide phosphodiesterase activity	0.0146979	0.291323	5.07117e-06	3.26214e-05	23	0.0404	0.0814059	0.0016553	0.013829	0.0560189	Pde4b(0.68), Pde1c(0.62), Pde10a(0.52), Pde6a(0.47), Pde3a(0.43), Pde4d(0.33), Pde3b(0.29), Pde8b(0.28), Pde7b(0.23), Pde9a(0.22), Tdp2(0.22), Pde2a(0.2), Pde7a(0.19), Pde1a(0.14), Pde8a(0.12), Pde4a(0.1), Pde1b(0.09), Pde12(-0.01), Usb1(-0.03), Smpdl3a(-0.08), Pde5a(-0.16), Enpp6(-0.21), Smpdl3b(-1.36),
calmodulin-dependent cyclic-nucleotide phosphodiesterase activity	0.0146979	0.291323	5.07117e-06	3.26214e-05	23	0.0404	0.0814059	0.0016553	0.013829	0.0560189	Pde4b(0.68), Pde1c(0.62), Pde10a(0.52), Pde6a(0.47), Pde3a(0.43), Pde4d(0.33), Pde3b(0.29), Pde8b(0.28), Pde7b(0.23), Pde9a(0.22), Tdp2(0.22), Pde2a(0.2), Pde7a(0.19), Pde1a(0.14), Pde8a(0.12), Pde4a(0.1), Pde1b(0.09), Pde12(-0.01), Usb1(-0.03), Smpdl3a(-0.08), Pde5a(-0.16), Enpp6(-0.21), Smpdl3b(-1.36),
cGMP-inhibited cyclic-nucleotide phosphodiesterase activity	0.0146979	0.291323	5.07117e-06	3.26214e-05	23	0.0404	0.0814059	0.0016553	0.013829	0.0560189	Pde4b(0.68), Pde1c(0.62), Pde10a(0.52), Pde6a(0.47), Pde3a(0.43), Pde4d(0.33), Pde3b(0.29), Pde8b(0.28), Pde7b(0.23), Pde9a(0.22), Tdp2(0.22), Pde2a(0.2), Pde7a(0.19), Pde1a(0.14), Pde8a(0.12), Pde4a(0.1), Pde1b(0.09), Pde12(-0.01), Usb1(-0.03), Smpdl3a(-0.08), Pde5a(-0.16), Enpp6(-0.21), Smpdl3b(-1.36),
photoreceptor cyclic-nucleotide phosphodiesterase activity	0.0146979	0.291323	5.07117e-06	3.26214e-05	23	0.0404	0.0814059	0.0016553	0.013829	0.0560189	Pde4b(0.68), Pde1c(0.62), Pde10a(0.52), Pde6a(0.47), Pde3a(0.43), Pde4d(0.33), Pde3b(0.29), Pde8b(0.28), Pde7b(0.23), Pde9a(0.22), Tdp2(0.22), Pde2a(0.2), Pde7a(0.19), Pde1a(0.14), Pde8a(0.12), Pde4a(0.1), Pde1b(0.09), Pde12(-0.01), Usb1(-0.03), Smpdl3a(-0.08), Pde5a(-0.16), Enpp6(-0.21), Smpdl3b(-1.36),
7,8-dihydro-D-neopterin 2',3'-cyclic phosphate phosphodiesterase activity	0.0146979	0.291323	5.07117e-06	3.26214e-05	23	0.0404	0.0814059	0.0016553	0.013829	0.0560189	Pde4b(0.68), Pde1c(0.62), Pde10a(0.52), Pde6a(0.47), Pde3a(0.43), Pde4d(0.33), Pde3b(0.29), Pde8b(0.28), Pde7b(0.23), Pde9a(0.22), Tdp2(0.22), Pde2a(0.2), Pde7a(0.19), Pde1a(0.14), Pde8a(0.12), Pde4a(0.1), Pde1b(0.09), Pde12(-0.01), Usb1(-0.03), Smpdl3a(-0.08), Pde5a(-0.16), Enpp6(-0.21), Smpdl3b(-1.36),
inositol phosphosphingolipid phospholipase activity	0.0146979	0.291323	5.07117e-06	3.26214e-05	23	0.0404	0.0814059	0.0016553	0.013829	0.0560189	Pde4b(0.68), Pde1c(0.62), Pde10a(0.52), Pde6a(0.47), Pde3a(0.43), Pde4d(0.33), Pde3b(0.29), Pde8b(0.28), Pde7b(0.23), Pde9a(0.22), Tdp2(0.22), Pde2a(0.2), Pde7a(0.19), Pde1a(0.14), Pde8a(0.12), Pde4a(0.1), Pde1b(0.09), Pde12(-0.01), Usb1(-0.03), Smpdl3a(-0.08), Pde5a(-0.16), Enpp6(-0.21), Smpdl3b(-1.36),
inositol phosphorylceramide phospholipase activity	0.0146979	0.291323	5.07117e-06	3.26214e-05	23	0.0404	0.0814059	0.0016553	0.013829	0.0560189	Pde4b(0.68), Pde1c(0.62), Pde10a(0.52), Pde6a(0.47), Pde3a(0.43), Pde4d(0.33), Pde3b(0.29), Pde8b(0.28), Pde7b(0.23), Pde9a(0.22), Tdp2(0.22), Pde2a(0.2), Pde7a(0.19), Pde1a(0.14), Pde8a(0.12), Pde4a(0.1), Pde1b(0.09), Pde12(-0.01), Usb1(-0.03), Smpdl3a(-0.08), Pde5a(-0.16), Enpp6(-0.21), Smpdl3b(-1.36),
mannosyl-inositol phosphorylceramide phospholipase activity	0.0146979	0.291323	5.07117e-06	3.26214e-05	23	0.0404	0.0814059	0.0016553	0.013829	0.0560189	Pde4b(0.68), Pde1c(0.62), Pde10a(0.52), Pde6a(0.47), Pde3a(0.43), Pde4d(0.33), Pde3b(0.29), Pde8b(0.28), Pde7b(0.23), Pde9a(0.22), Tdp2(0.22), Pde2a(0.2), Pde7a(0.19), Pde1a(0.14), Pde8a(0.12), Pde4a(0.1), Pde1b(0.09), Pde12(-0.01), Usb1(-0.03), Smpdl3a(-0.08), Pde5a(-0.16), Enpp6(-0.21), Smpdl3b(-1.36),
mannosyl-diinositol phosphorylceramide phospholipase activity	0.0146979	0.291323	5.07117e-06	3.26214e-05	23	0.0404	0.0814059	0.0016553	0.013829	0.0560189	Pde4b(0.68), Pde1c(0.62), Pde10a(0.52), Pde6a(0.47), Pde3a(0.43), Pde4d(0.33), Pde3b(0.29), Pde8b(0.28), Pde7b(0.23), Pde9a(0.22), Tdp2(0.22), Pde2a(0.2), Pde7a(0.19), Pde1a(0.14), Pde8a(0.12), Pde4a(0.1), Pde1b(0.09), Pde12(-0.01), Usb1(-0.03), Smpdl3a(-0.08), Pde5a(-0.16), Enpp6(-0.21), Smpdl3b(-1.36),
actin filament-based movement	0.0127218	0.358273	5.43658e-06	3.49086e-05	16	0.0259518	0.0323752	0.00876569	0.0774172	0.0123006	Myh9(0.39), Myo1b(0.39), Wipf2(0.36), Apbb2(0.34), Myo9b(0.26), Wasf2(0.23), Was(0.22), Myh10(0.21), Evl(0.14), Wipf3(0.13), Wipf1(0.12), Myh14(0.11), Myo5a(0.09), Myo5a(0.09), Myo7a(0.01), Apbb1(-0.11),
lens morphogenesis in camera-type eye	0.018336	0.354025	5.49001e-06	3.51878e-05	15	0.090879	0.00432315	0.0155197	0.0722963	0.0120592	Sox11(0.57), Tfap2a(0.49), Prox1(0.36), Bcar3(0.36), Cited2(0.27), Ski(0.24), Meis1(0.19), Shroom2(0.14), Fgfr3(0.12), Tdrd7(0.06), Tdrd7(0.06), Nectin3(0.05), Ctnnb1(0.03), Nectin1(-0.12), Cryaa(-0.26),
activin receptor signaling pathway	0.0183748	0.432829	5.71664e-06	3.65741e-05	10	0.0668172	0.0144375	0.0421714	0.00975311	0.0194477	Inhba(1.17), Inhbb(0.79), Smad3(0.4), Acvr1b(0.29), Acvr1b(0.29), Acvr2b(0.22), Acvr1(0.14), Acvr2a(0.1), Smad2(-0.03), Gdf6(-0.31),
positive regulation of tyrosine phosphorylation of Stat3 protein	0.0204754	0.298132	5.75189e-06	3.67332e-05	21	0.0255413	0.00918751	0.0225161	0.0597968	0.0262167	Il6(1.24), Lif(1.22), Osm(0.69), Ptger4(0.55), Il6ra(0.54), Jak2(0.31), Il15(0.3), Il6st(0.21), Clcf1(0.18), Clcf1(0.18), Kit(0.17), Csf1r(0.12), Fgfr3(0.12), Hes1(0.12), Hdac1(0.09), Il18(0.04), Crlf1(0.01), Arl2bp(-0.03), Hdac2(-0.09), Ctf1(-0.11), Hsf1(-0.2),
actomyosin	0.0174084	0.412898	5.94537e-06	3.79004e-05	11	0.0170841	0.00925962	0.0121992	0.0912847	0.0412635	Myh9(0.39), Stx1a(0.34), Cdc42bpb(0.28), Hdac4(0.27), Cdc42bpa(0.22), Myh10(0.21), Lurap1(0.15), Kat2b(0.12), Myh14(0.11), Myo5a(0.09), Myo18a(0),
metanephros development	0.0167634	0.220139	5.96485e-06	3.79562e-05	39	0.167012	0.0132274	0.00235348	0.0209056	0.0405699	Gdnf(1.1), Gdnf(1.1), Hoxc11(0.58), Gli3(0.43), Tshz3(0.4), Id3(0.39), Itga8(0.39), Itga8(0.39), Rdh10(0.37), Osr2(0.36), Slit2(0.31), Fbn1(0.3), Nf1(0.29), Wt1(0.25), Bcl2(0.24), Robo2(0.17), Lhx1(0.16), Spry1(0.16), Irx2(0.12), Hoxd11(0.09), Irx1(0.09), Nkx3-1(0.09), Osr1(0.08), Id2(0.07), Foxc2(0.02), Bmp4(0.01), Bmp4(0.01), Hoxa11(-0.04), Irx3(-0.1), Pax8(-0.11), Pax8(-0.11), Aph1a(-0.11), Gd…
blood microparticle	0.00991704	0.181295	6.16776e-06	3.91769e-05	81	0.00406281	0.110339	0.00278222	0.00370892	0.325015	Hspa1a(1.41), Slc4a1(0.91), Acta1(0.74), Trf(0.61), Serpina3m(0.54), F13a1(0.52), Hspa1l(0.44), Fn1(0.4), Pros1(0.39), Ambp(0.37), Itih2(0.33), Serpina3n(0.32), Itga2b(0.31), Clu(0.29), Hspa2(0.29), Stom(0.28), Tgfb1(0.28), Gsn(0.28), Kng1(0.27), Kng1(0.27), Hp(0.26), Slc2a1(0.26), Actg1(0.25), Hspa8(0.24), Hba-a2(0.24), Cfh(0.23), Msn(0.21), Kng2(0.21), Kng2(0.21), Gripap1(0.2), C1s1(0.19), C8a(…
positive regulation of synapse assembly	0.00727253	0.234605	6.1797e-06	3.91824e-05	44	0.700673	0.0609508	0.00138482	0.00373078	0.00101448	Ntrk2(0.94), Clstn3(0.92), Clstn3(0.92), Tpbg(0.81), Ephb3(0.69), Amigo2(0.53), Efna5(0.46), Thbs2(0.46), Flrt3(0.45), Ephb2(0.35), Ephb2(0.35), Ntrk3(0.35), Lrrn3(0.27), Flrt2(0.26), Mecp2(0.24), Cux2(0.23), Ephb1(0.23), Oxtr(0.22), Adgrl2(0.22), Clstn2(0.21), Il1rap(0.2), Flrt1(0.18), Slitrk4(0.17), Asic2(0.14), Lrtm2(0.12), Adgrl1(0.11), Bhlhb9(0.08), Wnt7a(0.07), Wnt7a(0.07), Actr3(0.06), Ami…
adrenal gland development	0.0105946	0.351274	6.25227e-06	3.95716e-05	17	0.500275	0.00830671	0.0116745	0.0116727	0.00226551	Arid5b(0.54), Hmga2(0.4), Stra6(0.37), Igf1r(0.33), Insr(0.32), Nf1(0.29), Cited2(0.27), Pdgfra(0.27), Wt1(0.25), Wt1(0.25), Nr3c1(0.19), Pdgfrb(0.19), Cdkn1c(0.09), Pbx1(0.05), Ly6e(-0.08), Mdk(-0.36), Apoa1(-0.5),
negative regulation of ossification	0.0212533	0.304223	6.48204e-06	4.09526e-05	20	0.0647625	0.027503	0.0166985	0.0188741	0.0173783	Notch1(0.64), Adrb2(0.47), Smad6(0.36), Hif1a(0.34), Calcr(0.32), P2ry2(0.28), Tgfb1(0.28), Smurf1(0.27), Mef2c(0.26), Bcl2(0.24), Enpp1(0.2), Calca(0.17), Ptk2b(0.12), Chsy1(0.05), Sox9(0.04), Sox9(0.04), Sfrp1(0.02), Sfrp1(0.02), Rbpj(-0.05), Lrp4(-0.25),
regulation of pH	0.0176476	0.27955	6.61133e-06	4.1695e-05	25	0.0660147	0.00932466	0.0170382	0.101701	0.0063606	Slc26a4(0.78), Slc9a3(0.73), Slc9a3(0.73), Edn1(0.53), Ednrb(0.5), Slc9a7(0.37), Car14(0.36), Slc9a9(0.3), Car2(0.28), Slc9a4(0.26), Agtr1a(0.17), Car12(0.16), Slc4a4(0.15), Slc9a1(0.09), Slc9a1(0.09), Slc9a1(0.09), Pdk4(0.04), Slc9a8(-0.01), Pdk2(-0.03), Atp6v1b1(-0.04), Atp6v1b1(-0.04), Atp6v0a4(-0.04), Slc9a2(-0.1), Car4(-0.15), Rhcg(-0.54),
positive regulation of positive chemotaxis	0.0145578	0.439907	6.82627e-06	4.29739e-05	10	0.0809003	0.0392986	0.0207969	0.00855042	0.0159572	S1pr1(0.59), Kdr(0.51), Itga2(0.44), Smad3(0.4), Ntrk3(0.35), Cdh13(0.3), Vegfa(0.29), F2rl1(0.23), Akt2(0.02), Casr(-0.06),
positive regulation of NF-kappaB transcription factor activity	0.0145649	0.125681	7.39906e-06	4.64971e-05	119	0.153094	0.0226906	0.090705	0.0017211	0.00819947	Trim15(1.08), Tnfsf18(0.92), Aim2(0.72), Adam8(0.71), Cd84(0.69), Il1b(0.69), Tlr4(0.55), Nlrp3(0.48), Prkcq(0.46), Prkcq(0.46), Prkcq(0.46), Cflar(0.45), Ager(0.42), Prkch(0.42), Irak3(0.4), Irak3(0.4), Nod2(0.4), Nod2(0.4), Sphk1(0.36), Traf1(0.35), Tgfbr3(0.33), Rps6ka5(0.31), Clu(0.29), Prkd2(0.29), Tgfb1(0.28), Ripk3(0.28), Lrrfip1(0.27), Lrrfip1(0.27), Cd40(0.26), Ripk4(0.24), Tnfrsf11a(0.2…
negative regulation of osteoclast differentiation	0.0185288	0.353941	7.43543e-06	4.66428e-05	15	0.209553	0.0479219	0.0279191	0.00645022	0.00246648	Inpp4b(0.58), Inpp4b(0.58), Ceacam1(0.41), Inpp5d(0.37), Nf1(0.29), Tmem178(0.2), Pik3r1(0.19), Ubash3b(0.16), Tob2(0.15), Clec2d(0.15), Ctnnb1(0.03), Mafb(0.02), Sfrp1(0.02), Sfrp1(0.02), Fstl3(0),
insulin-like growth factor receptor binding	0.00823495	0.377737	7.53514e-06	4.71847e-05	15	0.517439	0.0531479	0.00151274	0.00039006	0.0374801	Irs1(0.4), Socs2(0.36), Insr(0.32), Ren1(0.28), Socs1(0.22), Gnas(0.19), Gnas(0.19), Pik3r1(0.19), Arrb1(0.17), Igf2(0.16), Igf2(0.16), Shc1(0.16), Igf1(0.12), Igf1(0.12), Ywhag(-0.06),
negative regulation of protein kinase activity	0.0198555	0.149668	7.67076e-06	4.78869e-05	83	0.0259805	0.0252653	0.0095796	0.0186314	0.0894818	Il6(1.24), Socs3(0.85), Drd1(0.69), Gadd45b(0.65), Gadd45a(0.55), Trib1(0.51), Fabp4(0.48), Nyx(0.46), Flrt3(0.45), Socs5(0.44), Sh3bp5(0.42), Ceacam1(0.41), Pkib(0.39), Lrp6(0.38), Rtn4rl2(0.38), Socs2(0.36), Gadd45g(0.32), Ptprc(0.31), Ptprc(0.31), Epha1(0.3), Nf1(0.29), Nf1(0.29), Dcn(0.27), Flrt2(0.26), Cish(0.22), Socs1(0.22), Shb(0.2), Adora2a(0.19), Dbndd2(0.19), Socs7(0.18), Flrt1(0.18), …
positive regulation of Rho protein signal transduction	0.00319718	0.388819	7.67436e-06	4.78869e-05	19	0.87	0.0105624	0.000749563	0.000751859	0.0161879	P2ry10(1.06), Akap13(0.48), Gpr4(0.41), Gpr17(0.36), Robo1(0.28), Col3a1(0.27), F2rl1(0.23), F2rl1(0.23), Pdgfrb(0.19), F2r(0.17), Arrb1(0.17), Lpar1(0.14), Lpar1(0.14), Mcf2l(0.14), Ngfr(0.14), Adgrg1(0.07), Lpar6(-0.14), Lpar2(-0.28), Apoa1(-0.5),
leukocyte migration involved in inflammatory response	0.00692605	0.495046	7.80204e-06	4.85979e-05	11	0.148284	0.142577	0.0120809	0.0151936	0.000881233	Ppbp(1.22), S100a9(0.76), S100a8(0.74), Adam8(0.71), Itgam(0.44), Cd24a(0.34), Aoc3(0.3), Ccl2(0.27), Itgb2(0.18), Cx3cl1(-0.14), Jam3(-0.14),
collagen trimer	0.00547106	0.243861	7.91291e-06	4.92019e-05	49	0.187881	0.00658613	0.0273028	0.00731048	0.0271542	Col6a6(0.93), Col11a2(0.83), Col17a1(0.66), Col13a1(0.6), Col24a1(0.58), Emilin2(0.57), Col12a1(0.56), C1qtnf1(0.52), Lox(0.44), Col20a1(0.41), Col5a2(0.37), Col4a2(0.36), C1qtnf3(0.35), Col7a1(0.34), Col4a1(0.32), Ccbe1(0.31), Col23a1(0.28), Col3a1(0.27), C1qtnf7(0.26), Col4a4(0.22), Col4a3(0.2), Msr1(0.2), Emilin1(0.19), Colec12(0.17), Col14a1(0.12), Scara3(0.12), Wdr33(0.11), Col18a1(0.02), Co…
hyaluronic acid binding	0.00946042	0.394584	8.04258e-06	4.99205e-05	17	0.350105	0.0365033	0.0150994	0.00829426	0.00184343	Stab2(0.64), Lyve1(0.6), Tnfaip6(0.59), Impg2(0.56), Cd44(0.49), Cd44(0.49), Cd44(0.49), Vcan(0.4), Cemip(0.35), Cemip(0.35), Stab1(0.31), Layn(0.04), Hyal2(-0.27), Hyal2(-0.27), Habp4(-0.29), C1qbp(-0.61), Hmmr(-0.75),
PML body	0.0141522	0.171517	8.38037e-06	5.1926e-05	78	0.00608387	0.141587	0.0543448	0.0117808	0.0147904	Ankrd2(0.57), Hipk2(0.42), Hipk2(0.42), Crebbp(0.4), Sirt1(0.4), Elf4(0.38), Pml(0.32), Pml(0.32), Pml(0.32), Casp8ap2(0.32), Zbtb16(0.32), Hipk1(0.31), Lrch4(0.31), Lrch4(0.31), Kat6a(0.31), Atrx(0.29), Trim16(0.27), Wdfy3(0.25), Ski(0.24), Tdp2(0.22), Smc5(0.2), Hipk3(0.19), Topors(0.19), Mapk7(0.18), Zmym2(0.18), Rb1(0.15), Satb1(0.14), Blm(0.12), Ube2i(0.12), Morc3(0.11), Morc3(0.11), Trim8(0…
microfilament motor activity	0.0164143	0.395718	8.72211e-06	5.3949e-05	12	0.0298604	0.0144169	0.00748559	0.167581	0.0162105	Myh9(0.39), Myo1b(0.39), Myo3b(0.39), Myo9b(0.26), Myo9b(0.26), Myh10(0.21), Myo1d(0.17), Myo1c(0.11), Myh14(0.11), Myo5a(0.09), Myo5a(0.09), Myo7a(0.01),
positive regulation of BMP signaling pathway	0.0127093	0.248436	8.75304e-06	5.40458e-05	32	0.0839751	0.0274319	0.00716174	0.0213758	0.0337057	Notch1(0.64), Sox11(0.57), Sulf1(0.52), Kdr(0.51), Gata6(0.43), Gata6(0.43), Foxd1(0.42), Tgfbr3(0.33), Bmpr2(0.32), Notch2(0.28), Cyr61(0.26), Rnf165(0.21), Eng(0.2), Vsir(0.2), Vsir(0.2), Gpc3(0.17), Twsg1(0.14), Hes1(0.12), Acvrl1(0.11), Acvrl1(0.11), Zfp423(0.1), Smad4(0.05), Bmp4(0.01), Neo1(-0.02), Smad2(-0.03), Ube2o(-0.03), Rbpj(-0.05), Kcp(-0.07), Pelo(-0.15), Fkbp8(-0.19), Fbxl15(-0.19)…
activation of MAPKK activity	0.0228171	0.254723	8.84011e-06	5.44884e-05	28	0.050114	0.0169645	0.0140318	0.0493814	0.0235157	Gadd45b(0.65), Egf(0.56), Tgfbr1(0.39), Map3k5(0.35), Adora1(0.32), Gadd45g(0.32), Fgf2(0.31), Jak2(0.31), Map3k6(0.29), Egfr(0.25), Taok2(0.25), Zak(0.24), Lrrk2(0.23), Kiss1r(0.23), Adam9(0.18), F2r(0.17), Map3k13(0.16), Raf1(0.07), Map3k4(0.04), Eif2ak2(0.02), Bmp4(0.01), Map3k12(0.01), Psen1(-0.02), Map3k7(-0.02), Lamtor3(-0.05), Gnai2(-0.09), Map3k15(-0.1), Lamtor2(-0.11),
positive regulation of cardiac muscle cell proliferation	0.0100704	0.332359	9.09816e-06	5.59814e-05	19	0.394095	0.00225648	0.023576	0.0028709	0.0419929	Notch1(0.64), Ncam1(0.52), Gata6(0.43), Fgfr1(0.36), Fgfr1(0.36), Hey2(0.35), Fgfr2(0.32), Fgf2(0.31), Mef2c(0.26), Erbb4(0.25), Fgf9(0.12), Fgf9(0.12), Fgf9(0.12), Zfpm2(0.12), Tbx2(0.04), Bmpr1a(0.01), Mapk14(0), Rbpj(-0.05), Cdk1(-0.54),
protein phosphatase binding	0.0201964	0.150058	9.18423e-06	5.63854e-05	82	0.00516797	0.0142974	0.0398139	0.119283	0.0291028	Drd1(0.69), Cdh5(0.59), Nptxr(0.59), Irs2(0.49), Ppp1r15a(0.45), Ceacam1(0.41), Vcan(0.4), Cdh1(0.38), Flt4(0.38), Map3k5(0.35), Insr(0.32), Pstpip1(0.31), Jak3(0.29), Egfr(0.25), Erbb2(0.25), Bcl2(0.24), Eif2ak3(0.24), Hsp90aa1(0.24), Pparg(0.23), Ppp1r3c(0.23), Iqgap1(0.22), Skap1(0.22), Stat3(0.21), Jup(0.19), Jup(0.19), Pik3r1(0.19), Ctnnd1(0.16), Itga1(0.16), Cdh2(0.15), Cdkn1b(0.14), Csf1r(…
regulation of protein phosphorylation	0.0197146	0.179139	9.19569e-06	5.63854e-05	57	0.0133293	0.0182295	0.106415	0.0238955	0.0204239	Wnt9b(1), Socs3(0.85), Tlr8(0.71), Celsr3(0.66), Tlr7(0.44), Ccdc88a(0.43), Fn1(0.4), Itpkb(0.39), Pml(0.32), Prkar1b(0.32), Rictor(0.31), Phip(0.31), Ccdc88c(0.29), Ppp1r9b(0.27), Fnip2(0.27), Ccnyl1(0.23), Socs1(0.22), Pik3cg(0.22), Flcn(0.22), Phlpp1(0.21), Atg14(0.21), Arrb2(0.19), Arrb2(0.19), Dicer1(0.16), Nras(0.13), Ezh2(0.12), Igf1(0.12), Stat2(0.09), Map2k1(0.09), Mtor(0.09), Prkar2a(0.…
cellular response to cAMP	0.0239143	0.258813	9.26767e-06	5.67284e-05	27	0.0811475	0.00855303	0.00894363	0.0484506	0.0388101	Itpr3(0.62), Akap6(0.44), Rapgef2(0.36), Rapgef2(0.36), Rapgef2(0.36), Zfp36l1(0.32), Zfp36l1(0.32), Ahr(0.28), Igfbp5(0.28), Itpr2(0.26), Pik3cg(0.22), Rapgef3(0.21), Rapgef1(0.17), Kcnq1(0.14), Inpp5k(0.1), Aqp1(0.08), Ezr(0.06), Itpr1(0.04), Slc8a1(0.01), Rap1a(0.01), Slc26a6(-0.08), Rap1b(-0.08), Dmtn(-0.12), Cftr(-0.19), Gpd1(-0.24), Hcn2(-0.54), Adipoq(-1.32),
cyclin/CDK positive transcription elongation factor complex	0.0226303	0.4256	9.31689e-06	5.69312e-05	10	0.00757462	0.109018	0.0136185	0.0176825	0.0549065	Brd4(0.33), Ccnt1(0.24), Ccnt1(0.24), Ccnt2(0.21), Rb1(0.15), Taf7(0.15), Cdk9(0.04), Cdk9(0.04), Cdk9(0.04), Snw1(-0.04),
retinal ganglion cell axon guidance	0.00915396	0.401436	9.40766e-06	5.73867e-05	14	0.250355	0.0486399	0.00258142	0.00225434	0.0549566	Ephb3(0.69), Efna5(0.46), Ptprm(0.38), Ephb2(0.35), Slit2(0.31), Slit2(0.31), Slit2(0.31), Ephb1(0.23), Bmpr1b(0.18), Robo2(0.17), Rpl24(0.13), Epha7(-0.07), Nrcam(-0.07), Nrp1(-0.19),
histone deacetylase complex	0.0174111	0.224592	9.42868e-06	5.7416e-05	37	0.208991	0.0201329	0.00125759	0.130193	0.00526399	Hr(0.61), Nrip1(0.39), Tal1(0.35), Hdac4(0.27), Zfp217(0.26), Sap30(0.24), Elmsan1(0.24), Ncor2(0.23), Hdac5(0.22), Tbl1xr1(0.21), Tbl1xr1(0.21), Hdac7(0.2), Ncor1(0.14), Mecom(0.13), Rere(0.12), Cir1(0.11), Phf21a(0.09), Phf21a(0.09), Hdac1(0.09), Hdac1(0.09), Tbl1x(0.08), Tbl1x(0.08), Mta2(0.07), Cbx5(0.05), Dnttip1(0.05), Mbd2(0.04), Hdac6(0.02), Hdac3(-0.03), Sap18(-0.04), Hdac2(-0.09), Hdac8…
embryonic camera-type eye morphogenesis	0.0214712	0.359665	9.78111e-06	5.94597e-05	14	0.0205936	0.0137322	0.0402217	0.0561973	0.0246784	Tfap2a(0.49), Fzd5(0.43), Hipk2(0.42), Zeb1(0.4), Lrp6(0.38), Hipk1(0.31), Cited2(0.27), Sp1(0.22), Sp3(0.17), Bmp7(0.07), Tbx2(0.04), Kdm2b(-0.12), Cryaa(-0.26), Ihh(-0.51),
regulation of microtubule-based process	0.0228343	0.346755	9.87937e-06	5.99541e-05	15	0.0949648	0.032101	0.0142424	0.00859036	0.0353252	Macf1(0.44), Apc(0.35), Tacc1(0.33), Erbb2(0.25), Clasp2(0.25), Gsk3b(0.22), Gsk3b(0.22), Diaph1(0.18), Cep120(0.18), Tacc2(0.17), Tacc3(0.1), Map10(0.03), Klhl42(-0.21), Klhl42(-0.21), Memo1(-0.28),
phosphatidylinositol phosphorylation	0.0208134	0.287048	9.94904e-06	6.02734e-05	22	0.0109182	0.00699487	0.154012	0.062957	0.0125904	Efr3b(0.59), Pik3c2g(0.52), Smg1(0.31), Pik3ca(0.28), Ip6k2(0.28), Inpp1(0.26), Pik3cd(0.24), Pik3cg(0.22), Fam126a(0.21), Pik3cb(0.18), Ip6k1(0.16), Pi4ka(0.1), Pi4k2a(0.08), Ttc7b(0.08), Pik3c2a(0.05), Impad1(-0.01), Bpnt1(-0.03), Tmem150a(-0.05), Impa1(-0.06), Pi4kb(-0.06), Pik3c3(-0.1), Impa2(-0.53),
enteric nervous system development	0.0129098	0.459806	1.00725e-05	6.09172e-05	10	0.256803	0.0678953	0.00039662	0.0085916	0.0494526	Gdnf(1.1), Gdnf(1.1), Ret(0.51), Ednrb(0.5), Ednrb(0.5), Ednra(0.48), Hlx(0.44), Phactr4(0.09), Ntf3(-0.02), Kif26a(-0.28),
kidney morphogenesis	0.0160984	0.367438	1.01232e-05	6.11191e-05	14	0.266927	0.126147	0.000563418	0.00352043	0.035004	Wnt9b(1), Sox4(0.54), Gcnt4(0.45), Tshz3(0.4), Prkx(0.29), Ahr(0.28), Nphp3(0.19), Nphp3(0.19), Vangl2(0.16), Gcnt1(0.14), Hnf1b(0.14), Wwtr1(0), Gcnt3(-0.45), Wnt4(-0.5),
cornified envelope	0.0127801	0.426691	1.02033e-05	6.14982e-05	12	0.0932618	0.122977	0.00679942	0.011914	0.0102305	Ivl(1.03), Sprr2f(0.56), Sprr2f(0.56), Dsp(0.5), Evpl(0.38), Anxa1(0.33), Lor(0.31), Lor(0.31), Sprr1a(0.19), Sprr1a(0.19), Efr3a(-0.04), Kazn(-0.08),
positive regulation of calcium ion import	0.0184879	0.408087	1.02926e-05	6.19308e-05	11	0.141418	0.0403908	0.00819365	0.0025862	0.0660635	Cxcr4(0.86), Stc1(0.69), Serpine1(0.52), Pdgfb(0.45), Lgals3(0.27), Pdgfrb(0.19), Cask(0.16), Cxcl12(0.13), Atp2c2(0.09), Casr(-0.06), Trpv2(-0.13),
morphogenesis of an epithelial sheet	0.0232405	0.387229	1.0401e-05	6.24768e-05	12	0.0956985	0.00917723	0.0903921	0.0249323	0.00534576	Jag1(0.55), Lama1(0.32), Notch2(0.28), Hoxb4(0.25), Map3k1(0.2), Hoxb2(0.19), Srf(0.16), Mpp5(0.16), Dag1(0.1), Arhgap12(0.09), Lin7c(0.03), Chuk(-0.02),
perikaryon	0.0119752	0.158637	1.04629e-05	6.27417e-05	84	0.338282	0.0262398	0.000810223	0.0095185	0.0483939	Ntrk2(0.94), Kcnc2(0.86), Kcnc2(0.86), Pgr(0.66), Kcnab1(0.53), Pde10a(0.52), Map1b(0.51), Npy(0.48), Reln(0.45), Cacna1h(0.45), Azin2(0.4), Itga8(0.39), Esr1(0.37), Glul(0.37), Bglap3(0.36), Slc17a8(0.36), Naip6(0.3), Epha4(0.29), Nefm(0.29), Brd1(0.28), Penk(0.27), Ccl2(0.27), Nell2(0.27), Fus(0.26), Neurl1a(0.25), Hspa8(0.24), Lrrk2(0.23), Pde9a(0.22), Atp7a(0.17), Itga1(0.16), Ngfr(0.14), Map…
embryonic forelimb morphogenesis	0.0121313	0.285222	1.05514e-05	6.31658e-05	28	0.54417	0.0739712	0.00499633	0.00130828	0.00482325	Twist1(0.57), Cacna1c(0.5), Tfap2a(0.49), Lrp6(0.38), Lrp6(0.38), Rdh10(0.37), Osr2(0.36), Osr2(0.36), Tbx3(0.35), Runx2(0.29), Nipbl(0.29), Wnt9a(0.21), Reck(0.16), Aldh1a2(0.14), Mecom(0.13), Hoxd11(0.09), Osr1(0.08), Ift122(0.08), Wnt7a(0.07), Wnt7a(0.07), Wnt7a(0.07), Ctnnb1(0.03), Hoxa9(0), Lnpk1(0), Hoxa11(-0.04), Hoxd9(-0.15), Hoxd9(-0.15), Rpgrip1l(-0.16),
miRNA binding	0.015023	0.360334	1.08614e-05	6.49115e-05	15	0.331523	0.0378281	0.0331909	0.00443499	0.00232587	Zc3h12a(0.46), Rbm4(0.44), Ago2(0.33), Ago2(0.33), Ago2(0.33), Ago4(0.31), Mef2c(0.26), Ago3(0.24), Dicer1(0.16), Hnrnpa2b1(0.1), Fmr1(0.07), Fmr1(0.07), Ago1(-0.06), Ago1(-0.06), Pnpt1(-0.17),
negative regulation of neuron projection development	0.0141269	0.191482	1.10167e-05	6.57173e-05	59	0.293061	0.0379643	0.0153452	0.00372423	0.00985851	Crmp1(0.55), Epha3(0.46), Lrp1(0.45), Map4k4(0.42), Flna(0.42), Pmp22(0.37), Rap1gap2(0.28), Rap1gap2(0.28), Ptprg(0.25), Rtn4(0.25), Kank1(0.25), Gsk3b(0.22), Gsk3b(0.22), Dleu2(0.21), Cspg4(0.19), Pafah1b1(0.17), Vim(0.16), Thoc2(0.16), Lpar1(0.14), Lpar1(0.14), Lpar1(0.14), Ngfr(0.14), Ngfr(0.14), Rgma(0.14), Nr2f1(0.12), Hes1(0.12), Adcy6(0.09), Adcy6(0.09), Mdm2(0.07), Dpysl3(0.07), Inppl1(0…
protein desumoylation	0.0222708	0.385161	1.10334e-05	6.57173e-05	13	0.042338	0.0487648	0.0154643	0.0128113	0.0430469	Uspl1(0.2), Fam76b(0.18), Senp6(0.15), Senp6(0.15), Senp1(0.1), Senp1(0.1), Senp1(0.1), Senp5(0.09), Fam76a(0.07), Senp2(-0.02), Senp2(-0.02), Senp2(-0.02), Senp3(-0.1),
cardiac septum development	0.0210273	0.327097	1.10587e-05	6.57575e-05	17	0.0809964	0.0521958	0.0135277	0.0141717	0.0196668	Prdm1(0.57), Lrp1(0.45), Cntrl(0.36), Plxnd1(0.32), Kif7(0.26), 2410089E03Rik(0.22), Myh10(0.21), Pde2a(0.2), Ndst1(0.18), Pcsk5(0.17), Adamts6(0.17), Zbtb14(0.08), Smad4(0.05), Ap2b1(0.05), Fuz(0.01), Snx17(-0.01), Tab1(-0.21),
positive regulation of neutrophil chemotaxis	0.0056364	0.343826	1.11104e-05	6.59538e-05	24	0.143784	0.199386	0.0381118	0.00762467	0.000366187	Cxcl3(1.29), Cxcr2(1.09), Sell(0.76), Il1b(0.69), C5ar1(0.63), Cxcl2(0.62), Edn1(0.53), Ednra(0.48), Thbs4(0.35), Camk1d(0.31), Rac2(0.22), Rac2(0.22), Tirap(0.21), Nckap1l(0.16), Cxcl1(0.12), Dapk2(0.07), Rac1(0.06), Rac1(0.06), Lbp(-0.01), Cd74(-0.09), Ccr7(-0.23), Ccr7(-0.23), C3ar1(-0.43), C1qbp(-0.61),
Ras protein signal transduction	0.0204083	0.199864	1.16541e-05	6.90656e-05	46	0.0559213	0.0167951	0.153563	0.00646381	0.0126127	Plk2(0.7), Jun(0.69), Plce1(0.39), Dok2(0.35), Mapkapk5(0.35), Mapkapk5(0.35), Mapkapk5(0.35), Rassf1(0.32), Nf1(0.29), Nf1(0.29), Ulk1(0.24), Cnksr1(0.23), Prkd1(0.18), Rasgrp1(0.18), Dnmt1(0.16), Syngap1(0.16), Ksr1(0.15), Kras(0.13), Kras(0.13), Kras(0.13), Nras(0.13), Rasgrp3(0.12), Dok1(0.09), Dok3(0.09), Usp28(0.07), Sdcbp(0.06), Rras2(0.05), Usp8(0.05), Rfxank(0.04), Sos1(0.04), Grb2(0.03)…
histone H3-K4 trimethylation	0.0255988	0.323426	1.17548e-05	6.9546e-05	17	0.0154108	0.0386149	0.0568612	0.0370685	0.0153189	Kmt2a(0.53), Kmt2a(0.53), Tet3(0.48), Arid4a(0.35), Tet2(0.32), Tet2(0.32), Kmt2b(0.28), Ncoa6(0.21), Ncoa6(0.21), Rtf1(0.14), Zfp335(0.07), Hist1h1c(-0.01), Ogt(-0.04), Ctr9(-0.07), Ctr9(-0.07), Bend3(-0.18), Wdr61(-0.32),
smooth muscle contraction	0.0140979	0.402112	1.17745e-05	6.9546e-05	12	0.0547733	0.0410569	0.00972869	0.043638	0.0192575	Bdkrb2(0.92), Chrnb4(0.9), Cacna1c(0.5), Rock2(0.34), Pde4d(0.33), Tpcn2(0.25), Myh11(0.19), Myh11(0.19), Fkbp1b(0.05), Mylk(0.01), Chrm3(-0.08), Chrnb2(-0.09),
SNARE complex	0.0243417	0.194844	1.19464e-05	7.04442e-05	60	0.0675285	0.0807413	0.0392208	0.0124076	0.00540491	Stx1b(0.69), Stx11(0.68), Stxbp5l(0.64), Stx1a(0.34), Syn2(0.19), Stx5a(0.18), Stx5a(0.18), Stx2(0.17), Stx6(0.14), Stx6(0.14), Gosr2(0.11), Stxbp5(0.11), Snx4(0.08), Vamp2(0.07), Vamp2(0.07), Stx17(0.07), Stx17(0.07), Cplx2(0.06), Stx12(0.04), Stx12(0.04), Gosr1(0.03), Stx16(0.02), Stx16(0.02), Stx3(0), Stx3(0), Sec22b(-0.01), Snap23(-0.01), Snap23(-0.01), Snap23(-0.01), Ykt6(-0.01), Ykt6(-0.01)…
heart looping	0.0172259	0.219096	1.24698e-05	7.3408e-05	39	0.249719	0.0405128	0.00165235	0.0177857	0.0246499	Notch1(0.64), Gja1(0.63), Dll1(0.45), Smad3(0.4), Stil(0.39), Lrp6(0.38), Tbx3(0.35), Hif1a(0.34), Pkd2(0.3), Ovol2(0.29), Notch2(0.28), Cited2(0.27), Mef2c(0.26), Kdm2a(0.25), Ccdc39(0.23), Sox17(0.22), Eng(0.2), Nphp3(0.19), Arl13b(0.17), Srf(0.16), Vangl2(0.16), Aldh1a2(0.14), Tgfbr2(0.14), Mib1(0.1), C2cd3(0.1), Ift172(0.06), Sufu(0.05), Ift57(0.03), Kif3a(0.02), Psen1(-0.02), Folr1(-0.05), R…
ubiquitin ligase complex	0.0174405	0.173676	1.25671e-05	7.38576e-05	87	0.00264299	0.0241746	0.222047	0.00540547	0.0893977	Hspa1a(1.41), Dnaja1(0.44), Rnf144b(0.34), Ubr2(0.34), Asb15(0.3), Rnf19b(0.25), Hspa8(0.24), Cbx8(0.23), Med12(0.23), Fbxo11(0.23), Rnf19a(0.22), Topors(0.19), Rnf40(0.18), Rnf217(0.18), Med20(0.15), Rnf8(0.13), Dcun1d3(0.13), Arih2(0.12), Rnf144a(0.12), Rnf2(0.11), Rnf2(0.11), Ubr1(0.11), Ankib1(0.1), Med23(0.09), Arih1(0.08), Traf7(0.08), Smurf2(0.07), Rchy1(0.07), Rnf20(0.07), Med1(0.05), Fbx…
central nervous system projection neuron axonogenesis	0.0119141	0.450706	1.28673e-05	7.54967e-05	10	0.284148	0.316795	0.00506265	0.00451106	0.000736442	Nr4a2(0.91), Ephb3(0.69), Ephb2(0.35), Bhlhe22(0.34), Slit2(0.31), Mycbp2(0.24), Ephb1(0.23), Ephb1(0.23), Dclk1(0.13), Chrnb2(-0.09),
positive regulation of nuclear-transcribed mRNA catabolic process, deadenylation-dependent decay	0.0220682	0.356518	1.30151e-05	7.62376e-05	14	0.0520771	0.0134705	0.0382084	0.0294637	0.0283143	Zfp36(0.37), Zfp36(0.37), Nanos1(0.37), Ago2(0.33), Zfp36l1(0.32), Tnrc6b(0.27), Cpeb3(0.2), Zfp36l2(0.18), Tnrc6c(0.18), Cnot1(0.09), Tob1(0.01), Cnot7(-0.02), Cnot7(-0.02), Pabpc1(-0.17),
cortical actin cytoskeleton organization	0.0224946	0.268685	1.30657e-05	7.63096e-05	25	0.0311519	0.0713705	0.0426447	0.0339235	0.00577473	Plek(0.65), Epb41l2(0.39), Fmnl2(0.38), Tln1(0.36), Rock2(0.34), Rock1(0.25), Rhoq(0.22), Rhoq(0.22), Epb41l3(0.2), Prkcdbp(0.17), Nckap1l(0.16), Ehd2(0.15), Epb41l1(0.09), Dlg1(0.06), Rab13(0.04), Arf6(0.03), Strip1(0.03), Llgl1(0.01), Llgl1(0.01), Ikbkb(0), Epb41(-0.05), Llgl2(-0.07), Cdk5(-0.09), Calr(-0.1), Tnf(-0.19),
dopamine receptor signaling pathway	0.0177388	0.437859	1.30706e-05	7.63096e-05	10	0.0576645	0.129704	0.0167955	0.0222897	0.0051439	Drd1(0.69), Drd1(0.69), Drd1(0.69), Rgs9(0.58), Gnao1(0.53), Htt(0.15), Gnai3(0.11), Adcy6(0.09), Nsg1(0.02), Klf16(-0.11),
bHLH transcription factor binding	0.0175266	0.259688	1.36513e-05	7.95689e-05	28	0.193004	0.123706	0.012302	0.0427568	0.000350274	Bhlhe41(0.74), Bhlhe41(0.74), Twist1(0.57), Bhlhe40(0.43), Smad3(0.4), Sirt1(0.4), Tcf4(0.35), Tcf4(0.35), Ep300(0.33), Runx2(0.29), Sp1(0.22), Tcf21(0.22), Ikzf4(0.16), Ube2i(0.12), Arntl(0.1), Tcf12(0.07), Tcf12(0.07), Usf1(0.07), Sox9(0.04), Lmo2(-0.03), Tcf3(-0.05), Tcf3(-0.05), Psmd9(-0.1), Psmd9(-0.1), Map3k10(-0.11), Scx(-0.14), Scx(-0.14), Usf2(-0.16),
lymphocyte homeostasis	0.0233222	0.401382	1.38295e-05	8.04751e-05	11	0.103845	0.0370765	0.0573668	0.0181128	0.00395163	Bcl2l11(0.46), Bcl2l11(0.46), Skil(0.33), Ahr(0.28), Ahr(0.28), Bcl2(0.24), Bcl2(0.24), Sos2(0.08), Sos1(0.04), Slc40a1(0), Spns2(-0.12),
estrogen receptor binding	0.026531	0.218789	1.39789e-05	8.12107e-05	37	0.0283831	0.0377283	0.0178928	0.0204354	0.0616569	Zfp366(0.47), Zfp366(0.47), Nrip1(0.39), Wipi1(0.35), Strn(0.28), Ddx5(0.26), Src(0.26), Fus(0.26), Ncoa3(0.24), Nsd1(0.24), Pparg(0.23), Ncoa2(0.22), Pik3r1(0.19), Arrb1(0.17), Dnmt1(0.16), Ncor1(0.14), Ncoa1(0.13), Padi2(0.12), Ccdc62(0.12), Nkx3-1(0.09), Ppargc1a(0.09), Ddx17(0.09), Cnot1(0.09), Med1(0.05), Ctnnb1(0.03), Prmt2(-0.01), Mms19(-0.01), Pias2(-0.03), Trip4(-0.05), Pcna(-0.11), Ddx5…
embryonic digit morphogenesis	0.0176577	0.171826	1.4168e-05	8.21743e-05	68	0.262586	0.00800886	0.0190129	0.0318485	0.00846107	Nog(0.96), Gja1(0.63), Mycn(0.63), Hoxc11(0.58), Twist1(0.57), Gli3(0.43), Gli3(0.43), Sfrp2(0.4), Lrp6(0.38), Lrp6(0.38), Ece1(0.37), Osr2(0.36), Tbx3(0.35), Tbx3(0.35), Ttbk2(0.33), Zbtb16(0.32), Mfsd7b(0.3), Grhl2(0.29), Zak(0.24), Zak(0.24), Chst11(0.22), 2410089E03Rik(0.22), Gnaq(0.12), Rab23(0.11), C2cd3(0.1), Hoxd11(0.09), Hdac1(0.09), Osr1(0.08), Ift122(0.08), Wnt7a(0.07), Gna12(0.06), Lr…
actin filament	0.0121605	0.181044	1.48113e-05	8.57647e-05	68	0.0307304	0.07746	0.0377587	0.128104	0.000864085	Acta1(0.74), Gas7(0.62), Ackr2(0.59), Akap13(0.48), Sh2b2(0.46), Dlc1(0.46), Flna(0.42), Dbn1(0.4), Myo1b(0.39), Fyn(0.37), Inpp5d(0.37), Wipf2(0.36), Apc2(0.34), Pls3(0.3), Myo9b(0.26), Src(0.26), Vcl(0.26), Actn1(0.24), Tsc1(0.23), Rac2(0.22), Rhoq(0.22), Cald1(0.22), Tmod1(0.16), Wdr1(0.16), Palld(0.16), Palld(0.16), Fkbp15(0.16), Coro1a(0.15), Wipf3(0.13), Wipf1(0.12), Wipf1(0.12), Ankrd26(0.…
Rac guanyl-nucleotide exchange factor activity	0.0159981	0.354995	1.49505e-05	8.64297e-05	15	0.131672	0.096733	0.00172328	0.0236479	0.0224037	Eps8l1(0.6), Kalrn(0.39), Farp1(0.33), Tiam1(0.31), Tiam1(0.31), Prex2(0.31), Spata13(0.19), Dock2(0.17), Arhgef2(0.12), Als2(0.12), Vav3(0.11), Vav1(0.07), Eps8l2(0.06), Arhgef4(-0.09), Farp2(-0.11),
positive regulation of peptidyl-serine phosphorylation	0.0242716	0.158394	1.51033e-05	8.71705e-05	71	0.0940363	0.0186441	0.0660797	0.0192705	0.00925967	Il6(1.24), Lif(1.22), Ntrk2(0.94), Il11(0.9), Csf3(0.76), Osm(0.69), Cd44(0.49), Cd44(0.49), Ppp1r15a(0.45), Spry2(0.44), Hcls1(0.4), Sfrp2(0.4), Bcar3(0.36), Ntrk3(0.35), Phip(0.31), Vegfa(0.29), Prkd2(0.29), Pik3ca(0.28), Tgfb1(0.28), Fnip2(0.27), Angpt1(0.25), Braf(0.25), Bcl2(0.24), Gsk3b(0.22), Rapgef3(0.21), Dock7(0.19), Arrb2(0.19), Prkd1(0.18), Lats1(0.17), Arrb1(0.17), Cav1(0.16), Bag4(0…
spectrin binding	0.0161903	0.258064	1.51559e-05	8.73315e-05	28	0.0903283	0.00163157	0.0284228	0.277155	0.00537774	Add2(0.83), Ank1(0.73), Ank1(0.73), Nphs1(0.41), Epb41l2(0.39), Epb41l2(0.39), Myo10(0.25), Sptan1(0.23), Sptan1(0.23), Sptan1(0.23), Unc13a(0.23), Camsap2(0.21), Camsap1(0.14), Camsap3(0.07), Ank3(0.06), Ank3(0.06), Gnb1(0.04), Kif3a(0.02), Myo7a(0.01), Ptprn(-0.02), Stx4a(-0.02), Add1(-0.03), Ush1c(-0.05), Ank2(-0.05), Epb41(-0.05), Epb41(-0.05), Dmtn(-0.12), Dctn2(-0.17),
exploration behavior	0.022632	0.420402	1.5266e-05	8.7823e-05	10	0.0464836	0.0413129	0.00621787	0.082257	0.0217946	Chl1(0.81), Shank3(0.61), Kmt2a(0.53), Abl2(0.3), Itga3(0.3), Lrrk2(0.23), Chrna4(0.17), Abat(0.17), Shank2(0.03), Atxn3(0.01),
cartilage development	0.0156589	0.185999	1.53095e-05	8.79304e-05	56	0.464881	0.0978096	0.00265334	0.00510707	0.00489482	Nog(0.96), Col11a2(0.83), Edn1(0.53), Sulf1(0.52), Csgalnact1(0.41), Sfrp2(0.4), Zeb1(0.4), Bmp2(0.34), Hif1a(0.34), Ep300(0.33), Zbtb16(0.32), Creb3l2(0.28), Smad1(0.26), Bmp3(0.26), Bmp1(0.22), Chst11(0.22), Sox5(0.2), Gnas(0.19), Bmpr1b(0.18), Atp7a(0.17), Smad9(0.17), Dicer1(0.16), Sulf2(0.15), Tgfbr2(0.14), Fgfr3(0.12), Bbs1(0.12), Itgb8(0.12), Hoxb3(0.08), Zbtb7a(0.08), Bmp7(0.07), Hoxc4(0.…
positive regulation of cellular component movement	0.0228609	0.368687	1.59272e-05	9.13299e-05	13	0.0360978	0.088	0.0334279	0.0645093	0.00255605	Ets1(0.41), Tgfbr1(0.39), Pdpn(0.32), Vegfa(0.29), Bcl6(0.25), Actn4(0.16), Actn4(0.16), Actn4(0.16), Chst3(0.13), Lyn(0.11), Adam17(0.09), Stat5b(0.07), Stmn1(-0.37),
learning	0.0226091	0.221462	1.62585e-05	9.30788e-05	36	0.161917	0.0651301	0.0044552	0.0150231	0.0224065	Ptgs2(1.16), Ntrk2(0.94), Drd1(0.69), Jun(0.69), Shank3(0.61), Shank3(0.61), Reln(0.45), Stra6(0.37), Ptn(0.36), Ephb2(0.35), Pak6(0.34), Ptgs1(0.31), Abl2(0.3), Atp8a1(0.27), Mecp2(0.24), Synj1(0.18), Synj1(0.18), Eif2ak4(0.17), Htt(0.15), Slc12a5(0.1), Shank2(0.03), Shank2(0.03), Rgs14(0.02), Bdnf(-0.01), Park2(-0.02), Arf4(-0.07), Chrnb2(-0.09), Chrnb2(-0.09), Uba6(-0.09), Gmfb(-0.11), Prkar2b…
regulation of endocytosis	0.0286025	0.263561	1.67555e-05	9.57692e-05	25	0.043463	0.0116943	0.0401599	0.0561252	0.0250108	Abl2(0.3), Cdh13(0.3), Ehd4(0.28), Ophn1(0.25), Picalm(0.24), Arhgap21(0.21), Ptpn1(0.19), Epn2(0.15), Ston2(0.13), Arfgap1(0.12), Rab21(0.09), Rab4b(0.08), Rab5b(0.07), Rab5a(0.07), Ston1(0.06), Ston1(0.06), Snx12(0.04), Rab4a(0.03), Tsc2(0.03), Synj2bp(-0.02), Bin1(-0.02), Vamp8(-0.04), Rufy1(-0.04), Rab5c(-0.06), Snap91(-1.05),
positive regulation of stress-activated MAPK cascade	0.0247808	0.306075	1.77104e-05	0.000101032	19	0.170295	0.0886795	0.0206718	0.00398595	0.0121622	Il1b(0.69), Sema4c(0.62), Tlr4(0.55), Nod2(0.4), Nod2(0.4), Mid1(0.37), Taok1(0.35), Taok2(0.25), Tgfb2(0.23), Hmgcr(0.15), Stk25(0.12), Nod1(0.08), Taok3(0.07), Ripk2(0.03), Eif2ak2(0.02), Pdcd10(0.01), Arl6ip5(-0.09), Card9(-0.2), Card9(-0.2),
positive regulation of mesenchymal cell proliferation	0.021763	0.241649	1.77335e-05	0.000101032	31	0.0867762	0.0385389	0.00531239	0.0112399	0.10013	Mycn(0.63), Foxf1(0.56), Kdr(0.51), Irs2(0.49), Irs1(0.4), Lrp6(0.38), Fgfr1(0.36), Fgfr1(0.36), Fgfr1(0.36), Foxp1(0.34), Fgfr2(0.32), Vegfa(0.29), Pdgfa(0.28), Trp63(0.27), Tgfbr2(0.14), Fgf9(0.12), Fgf9(0.12), Lrp5(0.05), Sox9(0.04), Ctnnb1(0.03), Arhgap5(0.02), Bmpr1a(0.01), Prrx1(-0.02), Gas1(-0.03), Fbxw4(-0.04), Hmgb1(-0.05), Chrd(-0.24), Smo(-0.26), Wnt5a(-0.3), Ihh(-0.51), Myc(-1.62),
endocytic vesicle	0.0251379	0.184975	1.80451e-05	0.000102554	51	0.0478608	0.0203724	0.0708864	0.0500148	0.0079414	Ffar4(0.66), Trf(0.61), Trf(0.61), Dysf(0.45), Pld1(0.39), Rapgef2(0.36), Dab2ip(0.3), Ccl2(0.27), Egfr(0.25), Egfr(0.25), Lrp2(0.21), Tirap(0.21), Myo6(0.19), Arrb2(0.19), Ocln(0.17), Igf2r(0.15), Abca1(0.14), Lpar1(0.14), Rapgef6(0.14), Cubn(0.13), Cubn(0.13), Ehd3(0.12), Plekhg5(0.12), Kif5b(0.11), Pik3c2b(0.09), Flot2(0.08), Sh3kbp1(0.08), Rab5b(0.07), Rab5a(0.07), Rab11fip4(0.06), Vps11(0.05…
1-phosphatidylinositol-4-phosphate 5-kinase activity	0.0264125	0.421637	1.80586e-05	0.000102554	10	0.0183034	0.0124686	0.0301443	0.216759	0.0124529	Pip5k1b(0.22), Pip5k1b(0.22), Pikfyve(0.11), Pip5k1a(0.1), Pip5k1a(0.1), Pip5k1a(0.1), Pip5k1c(0.06), Pip5k1c(0.06), Pip4k2b(0.03), Pip4k2c(0.03),
negative regulation of smooth muscle cell migration	0.01184	0.377921	1.8587e-05	0.000105386	15	0.5834	0.0219542	0.00143647	0.00344218	0.0414043	Prkg1(0.72), Sema6d(0.65), Igfbp3(0.55), Serpine1(0.52), Trib1(0.51), Lrp1(0.45), Slit2(0.31), Ndrg4(0.31), Igfbp5(0.28), Ppard(0.16), Ppargc1a(0.09), Bmpr1a(0.01), Rbpj(-0.05), Apex1(-0.61), Adipoq(-1.32),
aorta morphogenesis	0.0190553	0.402944	1.88542e-05	0.00010673	11	0.130904	0.0417629	0.0145622	0.0121797	0.0268584	Chd7(0.59), Jag1(0.55), Lrp1(0.45), Kat6a(0.31), Kat6a(0.31), Pdgfrb(0.19), Sec24b(0.17), Hes1(0.12), Tfap2b(0.06), Tbx2(0.04), Nprl3(-0.16),
negative regulation of fibroblast growth factor receptor signaling pathway	0.0183678	0.35921	1.89513e-05	0.000107108	15	0.158961	0.0779892	0.010694	0.00629668	0.0228152	Thbs1(0.72), Sulf1(0.52), Sulf1(0.52), Sulf1(0.52), Spry2(0.44), Spry2(0.44), Tcf7l2(0.23), Spry1(0.16), Sulf2(0.15), Ngfr(0.14), Gpc1(0.02), Fgfrl1(-0.03), Shisa2(-0.05), Wnt5a(-0.3), Wnt4(-0.5),
adaptive immune response	0.0164988	0.168032	1.99954e-05	0.000112649	70	0.118623	0.0410085	0.159847	0.00145322	0.0109768	Clec4d(1.16), Lilrb4a(0.92), Tnfsf18(0.92), Havcr2(0.71), Cd84(0.69), Itk(0.68), Rnf125(0.64), Syk(0.63), Pag1(0.56), Camk4(0.54), Fcamr(0.53), Icosl(0.4), Btk(0.37), Fyn(0.37), Anxa1(0.33), Jak2(0.31), Jak3(0.29), Prkd2(0.29), Pirb(0.25), Rnf19b(0.25), Pik3cd(0.24), Tnfrsf11a(0.23), Tsc1(0.23), Cd244(0.22), Skap1(0.22), Tnfrsf13b(0.21), Dclre1c(0.19), Eif2ak4(0.17), Bcl10(0.16), Cd86(0.16), Tec(…
positive regulation of blood vessel endothelial cell migration	0.0235031	0.321027	2.12267e-05	0.000119396	17	0.159535	0.0212343	0.0321162	0.0174053	0.0151016	Thbs1(0.72), Amotl1(0.47), Pdgfb(0.45), Fgf2(0.31), Vegfa(0.29), Prkd2(0.29), Tgfb1(0.28), Angpt1(0.25), Plcg1(0.2), Nfe2l2(0.19), Prkd1(0.18), Angpt4(0.11), Stat5a(0.1), Hspb1(-0.08), Prkca(-0.09), Akt1(-0.13), Vegfc(-0.18),
respiratory gaseous exchange	0.0224786	0.32019	2.14998e-05	0.00012067	18	0.147753	0.089825	0.00336935	0.0167782	0.027154	Edn1(0.53), Ednra(0.48), Flt4(0.38), Ccbe1(0.31), Mapk8ip3(0.3), Mecp2(0.24), Man2a1(0.22), Chst11(0.22), Ndst1(0.18), Chrna4(0.17), Dach1(0.17), Hoxa5(0.09), Pbx3(0.06), Mafb(0.02), Ndn(0.02), Man1a2(-0.01), Traf4(-0.03), Fut8(-0.09),
negative regulation of astrocyte differentiation	0.0251662	0.36565	2.19323e-05	0.000122585	13	0.00361597	0.0376795	0.103247	0.102667	0.0160631	Nog(0.96), Nog(0.96), Mycn(0.63), Id4(0.51), Hmga2(0.4), Ntrk3(0.35), Nf1(0.29), Mecp2(0.24), Fgfr3(0.12), Mbd1(0.12), Kdm4a(-0.02), Dab1(-0.49), Atf5(-0.49),
histone deacetylase binding	0.0219271	0.133596	2.20042e-05	0.000122793	103	0.0630741	0.0413537	0.0114657	0.046204	0.0278689	Hspa1a(1.41), Chd5(1.05), Bhlhe41(0.74), Hr(0.61), Prdm1(0.57), Gli3(0.43), Dact1(0.4), Ankrd1(0.4), Nrip1(0.39), Myocd(0.37), Hey2(0.35), Tal1(0.35), Hif1a(0.34), Lpin1(0.3), Klf4(0.3), Runx2(0.29), Nipbl(0.29), Sik1(0.28), Bcor(0.28), Runx3(0.27), Hdac4(0.27), Mef2a(0.26), Mef2c(0.26), Hsp90aa1(0.24), Mecp2(0.24), Ncor2(0.23), Hdac5(0.22), Sp1(0.22), Tcf21(0.22), Dnmt3b(0.21), Per2(0.21), Rela(…
protein deubiquitination	0.0256265	0.165075	2.24895e-05	0.000125304	78	0.00805432	0.125397	0.0252427	0.0379895	0.0329867	Tnfaip3(0.54), Zc3h12a(0.46), Usp27x(0.38), Usp35(0.35), Usp54(0.31), Usp47(0.29), Usp31(0.26), Usp2(0.25), Usp2(0.25), Otud7b(0.24), Usp43(0.23), Usp9x(0.22), Usp13(0.22), Uchl1(0.2), Uchl1(0.2), Usp42(0.2), Usp42(0.2), Usp11(0.2), Usp33(0.19), Usp34(0.18), Usp12(0.16), Cyld(0.15), Usp38(0.15), Usp37(0.14), Usp7(0.11), Usp7(0.11), Usp4(0.1), Dmwd(0.07), Usp19(0.07), Usp28(0.07), Usp48(0.06), Usp…
negative regulation of stress fiber assembly	0.020425	0.318174	2.26502e-05	0.000126001	18	0.0977418	0.051147	0.0126017	0.0256727	0.022487	S1pr1(0.59), Kank4(0.47), Dlc1(0.46), Phldb2(0.34), Clasp2(0.25), Wasf2(0.23), Tacstd2(0.22), Arhgap28(0.22), Clasp1(0.14), Arap1(0.12), Kank2(0.12), Arhgap6(0.1), Inpp5k(0.1), Ppp1r9a(0.08), Kank3(-0.03), Ppfia1(-0.04), Ppfia1(-0.04), Pfn1(-0.21),
miRNA mediated inhibition of translation	0.0237988	0.401669	2.29732e-05	0.000127597	11	0.113197	0.0163976	0.0340692	0.0764597	0.00595027	Rbm4(0.44), Zfp36(0.37), Ago2(0.33), Ago4(0.31), Tnrc6b(0.27), Ago3(0.24), Tnrc6a(0.22), Stat3(0.21), Tnrc6c(0.18), Ago1(-0.06), Eif6(-0.34),
transcriptional activator activity, RNA polymerase II distal enhancer sequence-specific binding	0.0198347	0.290854	2.31159e-05	0.000128188	21	0.147388	0.0331046	0.0481784	0.0156995	0.00797495	Rel(0.66), Bach1(0.48), Arid3b(0.34), Zeb2(0.32), Mef2c(0.26), Spi1(0.24), Nfkb1(0.21), Rela(0.21), Nfe2l2(0.19), Hoxb5(0.17), Nfatc1(0.1), Cux1(0.09), Fubp1(0.08), Hcfc1(0.07), Pbx3(0.06), Nfe2l1(0.05), Tardbp(-0.04), Tcf3(-0.05), Hmga1(-0.07), Sub1(-0.14), Scx(-0.14),
vesicle transport along microtubule	0.0252665	0.349999	2.35833e-05	0.000130575	15	0.0394392	0.0776436	0.0274736	0.0593105	0.00732568	Ndel1(0.29), Rasgrp1(0.18), Pafah1b1(0.17), Htt(0.15), Htt(0.15), Hap1(0.11), Kif5b(0.11), Kif5b(0.11), Wdr81(0.1), Map2k1(0.09), Cln3(0.07), Rab1a(0.06), Nde1(0.03), Prkcz(0), Wdr43(-0.49),
insulin-like growth factor binding	0.0103242	0.320169	2.37292e-05	0.000131178	22	0.253784	0.291828	0.000775474	0.0050376	0.0158971	Igfbp1(0.71), Htra4(0.6), Igfbp3(0.55), Esm1(0.51), Wisp1(0.38), Ctgf(0.35), Nov(0.34), Igf1r(0.33), Igf1r(0.33), Crim1(0.29), Igfbp5(0.28), Igfbp5(0.28), Cyr61(0.26), Igf2r(0.15), Igfbp6(0.05), Htra3(-0.05), Igfbp7(-0.08), Igfbp4(-0.27), Htra1(-0.34), Igfals(-0.63), Igfals(-0.63), Igfbp2(-0.92),
sarcomere organization	0.0224427	0.287329	2.39691e-05	0.000132297	21	0.134756	0.0104284	0.0162038	0.0699472	0.0196823	Xirp1(0.65), Ttn(0.57), Ttn(0.57), Ttn(0.57), Neb(0.55), Foxp1(0.34), Krt19(0.26), Actg1(0.25), Six4(0.22), Srf(0.16), Wdr1(0.16), Itgb1(0.11), Prkar1a(0.05), Krt8(0.01), Mylk3(0.01), Mylk3(0.01), Fhod3(0), Fhod3(0), Tnnt2(-0.05), Cfl2(-0.12), Ldb3(-0.15),
negative regulation of interleukin-6 production	0.0125565	0.273825	2.46586e-05	0.000135891	27	0.434974	0.00332485	0.0779796	0.024874	0.00242144	Havcr2(0.71), Tlr4(0.55), Tnfaip3(0.54), Hgf(0.46), Zc3h12a(0.46), Zc3h12a(0.46), Socs5(0.44), Irak3(0.4), Irak3(0.4), Klf2(0.27), Flt3(0.26), Arrb2(0.19), Arrb1(0.17), Nckap1l(0.16), Nlrc3(0.13), Nlrc3(0.13), Aqp4(0.08), Vimp(0.04), Trim30a(0.03), Tnfrsf1a(-0.02), Gba(-0.03), Nlrx1(-0.09), Nr1h4(-0.14), Tnf(-0.19), Csk(-0.24), Gas6(-0.35), Tlr9(-0.46),
alpha-catenin binding	0.0199917	0.369503	2.57652e-05	0.000141769	13	0.00381539	0.00743485	0.227067	0.075208	0.0389703	Cdh1(0.38), Vcl(0.26), Numb(0.21), Jup(0.19), Jup(0.19), Cdh2(0.15), Ctnnb1(0.03), Ctnnb1(0.03), Ctnnb1(0.03), Pkp3(0), Pkp2(-0.02), Ajuba(-0.03), Ajuba(-0.03),
endocardial cushion morphogenesis	0.0226608	0.345033	2.59672e-05	0.000142658	15	0.170713	0.0803512	0.0132394	0.00322024	0.0399597	Notch1(0.64), Twist1(0.57), Hey1(0.43), Bmp2(0.34), Heyl(0.29), Mdm4(0.24), Tgfb2(0.23), Eng(0.2), Acvr1(0.14), Acvrl1(0.11), Mdm2(0.07), Mdm2(0.07), Sox9(0.04), Tbx2(0.04), Bmpr1a(0.01),
organ induction	0.0272872	0.392424	2.71401e-05	0.000148871	11	0.128815	0.0587904	0.00346343	0.0120737	0.0847984	Gdnf(1.1), Hoxc11(0.58), Fgf1(0.45), Fgfr1(0.36), Fgf2(0.31), Fgfr4(0.16), Spry1(0.16), Frs2(0.1), Hoxd11(0.09), Bmp4(0.01), Hoxa11(-0.04),
vasoconstriction	0.0252676	0.35222	2.793e-05	0.000152966	14	0.114301	0.0319268	0.0283894	0.0242788	0.0189499	Bdkrb2(0.92), Htr1b(0.65), Edn1(0.53), Ednrb(0.5), Ednra(0.48), Ednra(0.48), Agtr1a(0.17), Cav1(0.16), P2rx1(0.15), Trpm4(0.11), Edn3(0.07), Ace(-0.21), Slc6a4(-0.4), Agt(-0.75),
mammary gland development	0.0203262	0.248257	2.83472e-05	0.000155011	29	0.296815	0.0893106	0.00224954	0.0048888	0.0445925	Pgr(0.66), Irs2(0.49), Bcl2l11(0.46), Gli3(0.43), Irs1(0.4), Tbx3(0.35), Tbx3(0.35), Igf1r(0.33), Notch4(0.33), Tgfb3(0.3), Tgfb1(0.28), Creb1(0.19), B4galt1(0.18), Cav1(0.16), Ptch1(0.15), Igf1(0.12), Stat5a(0.1), Pygo2(0.1), Fasn(0.07), Sox9(0.04), Hoxb9(0.03), Arhgap5(0.02), Brca2(0.02), Hoxa9(0), Gpat4(-0.03), Hoxd9(-0.15), Ntn1(-0.3), Gli2(-0.33), Nme1(-0.34),
branchiomotor neuron axon guidance	0.0183358	0.430939	2.86244e-05	0.000156286	10	0.393822	0.0493553	0.00855213	0.0132574	0.00667863	Plxna2(0.69), Plxna4(0.54), Plxnc1(0.45), Sema3a(0.42), Sema3f(0.39), Plxnd1(0.32), Plxna1(0.26), Mycbp2(0.24), Plxna3(-0.18), Nrp1(-0.19),
pre-autophagosomal structure	0.0218897	0.296309	2.89683e-05	0.000157566	21	0.00404837	0.0222735	0.0729594	0.102489	0.0533882	Wipi1(0.35), Wipi1(0.35), Ulk1(0.24), Rb1cc1(0.2), Zfyve1(0.16), Atg2a(0.15), Nbr1(0.14), Atg13(0.08), Atg9a(0.08), Atg9a(0.08), Atg101(0.07), Atg101(0.07), Vmp1(0.04), Stx12(0.04), Trappc8(0.03), Atg2b(0.01), D17Wsu92e(0.01), Wipi2(0), Becn1(-0.02), Atg7(-0.18), Sqstm1(-0.21),
positive regulation of fibroblast proliferation	0.0223126	0.179697	2.89734e-05	0.000157566	56	0.0547578	0.0242687	0.0117429	0.0185878	0.142535	Ereg(0.79), Jun(0.69), Jun(0.69), Itgb3(0.67), Fosl2(0.6), Egf(0.56), Serpine1(0.52), Pdgfb(0.45), Ager(0.42), Fn1(0.4), Ddr2(0.38), Esr1(0.37), Sphk1(0.36), Pml(0.32), Kmt2c(0.31), Zmiz1(0.3), Pdgfa(0.28), Tgfb1(0.28), Tgif1(0.28), Pdgfra(0.27), Fndc3b(0.27), Egfr(0.25), Wapl(0.21), Fbrs(0.2), Pdgfrb(0.19), Btc(0.16), Cdkn1a(0.15), Ngfr(0.14), Nras(0.13), Igf1(0.12), Rasa1(0.12), Aqp1(0.08), Pdg…
glomerulus development	0.0216545	0.414164	2.89925e-05	0.000157566	10	0.111194	0.0507674	0.189269	0.0138767	0.00113693	Plce1(0.39), Heyl(0.29), Wt1(0.25), Wt1(0.25), Bcl2(0.24), Tcf21(0.22), Ptpro(0.2), Vangl2(0.16), Enpep(0.14), Wwtr1(0),
positive regulation of tumor necrosis factor production	0.0178753	0.177728	2.97017e-05	0.000161173	65	0.356852	0.126068	0.0311581	0.00253818	0.00255561	Pf4(0.71), Twist1(0.57), Tlr4(0.55), Tlr4(0.55), Zbtb20(0.5), Zbtb20(0.5), Ptafr(0.42), Nod2(0.4), Nod2(0.4), Nod2(0.4), Nod2(0.4), Jak2(0.31), Cd14(0.3), Cd14(0.3), Clu(0.29), Ccl2(0.27), Tirap(0.21), Tirap(0.21), Pik3r1(0.19), Rasgrp1(0.18), Ccl4(0.18), Fcer1g(0.17), Fcer1g(0.17), Nfatc4(0.15), Tlr2(0.14), Tlr2(0.14), Arhgef2(0.12), Sash3(0.1), Hdac1(0.09), Ripk1(0.08), Nod1(0.08), Nod1(0.08), …
regulation of exocytosis	0.0291757	0.270285	2.9873e-05	0.000161854	23	0.170264	0.0603646	0.0252582	0.00395642	0.0315148	Stx1b(0.69), Stxbp5l(0.64), Rapgef4(0.63), Rab27b(0.51), Stx1a(0.34), Pclo(0.34), Rab3b(0.31), Sept5(0.28), Rab3a(0.22), Hap1(0.11), Stxbp5(0.11), Myo5a(0.09), Rab21(0.09), Vamp2(0.07), Vamp2(0.07), Nsf(0.03), Rph3al(0.03), Rab3d(0.01), Snap23(-0.01), Rala(-0.01), Rala(-0.01), Stx4a(-0.02), Rims2(-0.24),
interleukin-1-mediated signaling pathway	0.0329375	0.327074	3.0761e-05	0.000166156	16	0.0352239	0.0536683	0.0155518	0.0332354	0.0606415	Il1r1(0.49), Egr1(0.48), Irak3(0.4), Irak3(0.4), Rps6ka5(0.31), Plcb1(0.27), Tnip2(0.25), Traf6(0.11), Traf6(0.11), Irak2(0.11), Irak2(0.11), Rps6ka4(0.03), Ikbkb(0), Mapk3(-0.08), Irak1(-0.14), Irak1(-0.14),
response to wounding	0.0248699	0.217158	3.08464e-05	0.000166363	36	0.0695699	0.0352847	0.0543322	0.0174183	0.0252026	Il6(1.24), Gdnf(1.1), Vash1(0.57), Tnfaip3(0.54), Pdgfb(0.45), Serpine2(0.41), Itgb4(0.4), Zfp36(0.37), Zfp36(0.37), Zfp36l1(0.32), Casp3(0.3), Pdgfa(0.28), Ccl2(0.27), Srsf5(0.2), Zfp36l2(0.18), Pik3cb(0.18), F2r(0.17), Sulf2(0.15), Syt11(0.15), Ngfr(0.14), Map2k4(0.08), Slc1a3(0.07), Abhd2(0.02), Lcp1(0.01), Slc1a2(-0.01), Map2k7(-0.02), Cdk5(-0.09), Adm(-0.15), Aurka(-0.18), Klk8(-0.19), Gpx1(…
double-stranded DNA binding	0.0187678	0.132529	3.1125e-05	0.000167611	111	0.152177	0.0402611	0.0358283	0.016603	0.0122947	Fosb(1.12), Nr5a2(0.93), Aff3(0.88), Fos(0.83), Aim2(0.72), Aim2(0.72), Jun(0.69), Fosl2(0.6), Junb(0.5), Egr1(0.48), Klf6(0.44), Gata6(0.43), Xrcc3(0.41), Smad3(0.4), Zeb1(0.4), Tcf4(0.35), Maf(0.34), Tef(0.33), Zbtb16(0.32), Klf4(0.3), Ifi207(0.3), Trp63(0.27), Trp63(0.27), Safb2(0.27), Kin(0.25), Wt1(0.25), Sp1(0.22), Sp1(0.22), Safb(0.22), Jund(0.21), Nfkb1(0.21), Purb(0.21), Ercc5(0.2), Creb…
bleb assembly	0.0154417	0.399874	3.15969e-05	0.000169867	13	0.259578	0.0585893	0.00427788	0.0166308	0.024082	Emp1(0.76), Emp2(0.38), Pmp22(0.37), P2rx7(0.32), P2rx7(0.32), Rock1(0.25), Ano6(0.22), Ano6(0.22), Lpar1(0.14), Lpar3(0.12), Emp3(0.03), Mylk(0.01), Prdx6(-0.3),
negative regulation of epidermal growth factor receptor signaling pathway	0.0325201	0.333112	3.164e-05	0.000169867	15	0.0838613	0.0607625	0.0366533	0.00698063	0.0385593	Tfap2a(0.49), Cbl(0.48), Socs5(0.44), Ptprj(0.43), Errfi1(0.39), Errfi1(0.39), Dab2ip(0.3), Socs4(0.16), Itga1(0.16), Ptpn2(0.11), Ptprf(0.07), Rnf115(-0.04), Rnf115(-0.04), Cblc(-0.08), Rnf126(-0.35),
voltage-gated potassium channel complex	0.0176343	0.234093	3.1776e-05	0.000170339	46	0.347366	0.0391953	0.00176556	0.00239701	0.146364	Kcnc2(0.86), Kcnt1(0.65), Kcnab1(0.53), Kcnab1(0.53), Kcne4(0.47), Cntnap1(0.44), Abcc9(0.42), Kcna5(0.4), Kcnab2(0.37), Kcnh2(0.35), Stx1a(0.34), Kcnip4(0.3), Kcnip4(0.3), Kcns3(0.3), Kcnt2(0.29), Kcnj2(0.28), Kcnd3(0.27), Kcnmb1(0.24), Calm2(0.18), Kcnq1(0.14), Dlg4(0.1), Vamp2(0.07), Kcnb1(0.06), Kcnb1(0.06), Kcnf1(0.04), Cttn(0.03), Cttn(0.03), Kcnd1(0.01), Sumo1(-0.01), Calm1(-0.06), Kcnk2(-…
T cell receptor signaling pathway	0.0224566	0.20104	3.39437e-05	0.000181423	43	0.105367	0.167052	0.00962502	0.00430192	0.0425309	Itk(0.68), Pde4b(0.68), Ptpn22(0.52), Themis2(0.44), Fyn(0.37), Fyn(0.37), Rftn1(0.32), Ptprc(0.31), Prkd2(0.29), Lcp2(0.28), Braf(0.25), Skap1(0.22), Plcg1(0.2), Shb(0.2), Malt1(0.2), Malt1(0.2), Cacnb3(0.19), Gata3(0.18), Bcl10(0.16), Nras(0.13), Carmil2(0.13), Rnf31(0.12), Traf6(0.11), Plcg2(0.1), Cacnb4(0.08), Sppl3(0.05), Sppl3(0.05), Ripk2(0.03), Stk11(0.02), Stk11(0.02), Tnfrsf21(0.01), Ma…
aorta development	0.0212205	0.27783	3.39505e-05	0.000181423	24	0.140109	0.0275469	0.013348	0.0192508	0.0521818	Cxcr4(0.86), Chd7(0.59), Prdm1(0.57), Lox(0.44), Hectd1(0.43), Smad6(0.36), Cntrl(0.36), Plxnd1(0.32), Kif7(0.26), Lrp2(0.21), Myh10(0.21), Pde2a(0.2), Ltbp1(0.19), Ndst1(0.18), Adamts6(0.17), Dnm2(0.05), Sufu(0.05), Ap2b1(0.05), Fuz(0.01), Snx17(-0.01), Smarca4(-0.04), Prickle1(-0.08), Dctn5(-0.19), Tab1(-0.21),
monooxygenase activity	0.0190518	0.198648	3.40068e-05	0.000181423	51	0.00233539	0.00417507	0.00939105	0.331195	0.256675	Ch25h(0.76), Cyp2b10(0.74), Cyp27b1(0.69), Moxd1(0.64), Tbxas1(0.55), Cyp4f18(0.47), Pah(0.4), Cyp39a1(0.36), Cyp2d9(0.35), Cyp4v3(0.32), Fmo2(0.28), Mical2(0.27), Cyp1b1(0.24), Cyp1b1(0.24), Cyp2d26(0.24), Cyp3a13(0.23), Kmo(0.22), Mical1(0.2), Cyp46a1(0.16), Fmo1(0.16), Fmo1(0.16), Cyp26b1(0.16), Mical3(0.14), Pam(0.12), Cyp2e1(0.11), Cyp2e1(0.11), Fmo5(0.11), Cyp2j6(0.09), Cyp2f2(0.08), Cyp4a1…
positive regulation of stress fiber assembly	0.0112774	0.22773	3.40489e-05	0.000181423	42	0.334693	0.0360612	0.0181367	0.00899872	0.0131742	Wnt11(0.6), Prkcq(0.46), Smad3(0.4), Tgfbr1(0.39), Arhgef15(0.37), Ctgf(0.35), Arhgef10(0.32), Epha1(0.3), Tgfb3(0.3), Rgcc(0.27), Braf(0.25), Braf(0.25), Kiss1r(0.23), Tac1(0.22), Rapgef3(0.21), Sdc4(0.18), Gpr65(0.17), Nox4(0.16), Bag4(0.16), Evl(0.14), Lpar1(0.14), Ppm1f(0.1), Mtor(0.09), Carmil1(0.09), Carmil1(0.09), Sorbs3(0.08), Arhgef5(0.08), Pak1(0.06), Rac1(0.06), Pfn2(0.01), Pfn2(0.01),…
gap junction	0.0149949	0.290322	3.43785e-05	0.000182904	23	0.160163	0.0488981	0.0244644	0.02121	0.012137	Gja1(0.63), Gja1(0.63), Gjb4(0.43), Tjp1(0.4), Dbn1(0.4), Gjc1(0.37), Gjc1(0.37), Gja5(0.34), Gja5(0.34), Gjb5(0.34), Nov(0.34), Gja4(0.27), Tjp2(0.22), Specc1l(0.16), Gjb3(0.13), Des(0.07), Gjb2(-0.01), Gjb2(-0.01), Sgsm3(-0.04), Panx1(-0.27), Gjb1(-0.33), Gjb1(-0.33), Ybx3(-0.36),
positive regulation of cell-substrate adhesion	0.00517968	0.288489	3.48224e-05	0.000184987	32	0.656521	0.111679	0.00355114	3.54832e-05	0.0786432	Thbs1(0.72), Foxf1(0.56), Itga5(0.48), Dbn1(0.4), Ptn(0.36), Nid1(0.35), Spock2(0.34), Smoc2(0.32), Jak2(0.31), Itga3(0.3), Cyr61(0.26), Spp1(0.26), Abi3bp(0.26), Itga6(0.24), Fbln2(0.21), Ccdc80(0.19), Emilin1(0.19), Itgb1(0.11), Ppm1f(0.1), Egfl6(0.07), Edil3(0.06), Rac1(0.06), Prkce(0.03), Prkce(0.03), Rsu1(-0.05), Lims1(-0.05), Ecm2(-0.1), Npnt(-0.12), Egflam(-0.13), Hsd17b12(-0.19), Col8a1(-…
filopodium membrane	0.0228882	0.374813	3.49865e-05	0.00018558	13	0.178152	0.0466795	0.0411611	0.0148234	0.00868133	Itgb3(0.67), Itgav(0.53), Utrn(0.5), Tbc1d10c(0.49), Syne2(0.36), Itga3(0.3), Ttyh1(0.29), Antxr1(0.23), Msn(0.21), Dmd(0.06), Arf6(0.03), Palm(-0.22), Fzd9(-0.3),
regulation of heart rate by cardiac conduction	0.00703933	0.319819	3.50759e-05	0.000185776	24	0.0754261	0.146982	0.000750571	0.015429	0.142144	Dsc2(0.67), Cacna2d1(0.55), Cacna1c(0.5), Dsp(0.5), Kcna5(0.4), Kcnh2(0.35), Kcnh2(0.35), Gja5(0.34), Kcnj2(0.28), Jup(0.19), Cav1(0.16), Kcnq1(0.14), Dsg2(0.13), Cacna1d(0.09), Cacna1d(0.09), Cacnb2(0.07), Scn1b(0.03), Scn2b(0.02), Pkp2(-0.02), Scn5a(-0.05), Scn5a(-0.05), Ank2(-0.05), Kcne1(-0.21), Scn4b(-0.25),
retinol dehydrogenase activity	0.0256022	0.351957	3.53952e-05	0.000187041	14	0.0202087	0.00413777	0.0370242	0.177347	0.0689894	Dhrs9(1.07), Rdh12(0.79), Akr1c18(0.44), Rdh10(0.37), Rdh10(0.37), Rdh10(0.37), Bmp2(0.34), Adh1(0.19), Dhrs3(0.04), Rdh5(0), Rdh1(-0.11), Rdh16(-0.16), Adh7(-0.59), Adh7(-0.59),
RNA polymerase II transcription factor activity, ligand-activated sequence-specific DNA binding	0.0263828	0.212514	3.54205e-05	0.000187041	37	0.0732925	0.0450391	0.0101381	0.0974621	0.0169669	Nr4a3(0.99), Nr5a2(0.93), Nr5a2(0.93), Nr4a2(0.91), Pgr(0.66), Nr4a1(0.58), Rorb(0.49), Esr1(0.37), Rora(0.33), Ahr(0.28), Ahr(0.28), Pparg(0.23), Pparg(0.23), Stat3(0.21), Ppard(0.16), Ppard(0.16), Rara(0.14), Nr2f1(0.12), Rxra(0.07), Rxra(0.07), Nr2f2(0.06), Esrrg(0.05), Nr6a1(-0.01), Nr1h2(-0.01), Hnf4a(-0.1), Nr1i2(-0.1), Thra(-0.1), Ppara(-0.11), Ar(-0.12), Rxrb(-0.12), Glmp(-0.13), Nr1h4(-0…
alpha-actinin binding	0.0239235	0.360689	3.56124e-05	0.000187605	13	0.105828	0.270914	0.00389482	0.00790525	0.0256703	Cacna1c(0.5), Nphs1(0.41), Kcna5(0.4), Pkd2(0.3), Pparg(0.23), Adora2a(0.19), Magi1(0.17), Rara(0.14), Itgb1(0.11), Dag1(0.1), Alms1(0.1), Cacna1d(0.09), Pdlim2(-0.17),
bone morphogenesis	0.0153329	0.297967	3.56334e-05	0.000187605	21	0.18545	0.0416388	0.0102174	0.0775262	0.00595574	Has2(1.55), Tfap2a(0.49), Sfrp2(0.4), Lrp6(0.38), Osr2(0.36), Fgfr2(0.32), Cited2(0.27), Rarg(0.27), Rarg(0.27), Ski(0.24), Glg1(0.23), Cyp26b1(0.16), Fgfr3(0.12), Lrp5(0.05), Ltbp3(0.05), Chsy1(0.05), Dhrs3(0.04), Ift80(-0.04), Mmp13(-0.18), Sp5(-0.3), Acp5(-0.45),
neuromuscular synaptic transmission	0.0126211	0.387229	3.60126e-05	0.00018932	14	0.414397	0.215266	0.000301924	0.00347725	0.0406987	Egr3(0.54), Cd24a(0.34), Cd24a(0.34), Fchsd1(0.29), Rab3a(0.22), Stxbp1(0.2), Kif1b(0.19), Chrna4(0.17), Fchsd2(0.17), Chrnb1(0.16), Chrnb1(0.16), Cacna1a(0.03), Etv5(0), Ntf3(-0.02),
adult locomotory behavior	0.0277444	0.186384	3.66696e-05	0.000192488	48	0.152235	0.0411001	0.011343	0.00251652	0.154369	Nr4a2(0.91), Chl1(0.81), Ngf(0.54), Atxn1(0.53), Adam22(0.44), Hipk2(0.42), Tshr(0.39), Kalrn(0.39), Atp1a2(0.35), Prex2(0.31), Ccnd2(0.29), Mecp2(0.24), Tsc1(0.23), Pafah1b1(0.17), Pafah1b1(0.17), Tmod1(0.16), Ntf5(0.15), Grin2d(0.13), Cxcl12(0.13), Tbce(0.13), Atp1a3(0.12), Eps8(0.08), Btbd9(0.08), Cnp(0.07), Hoxd10(0.07), Id2(0.07), Pum1(0.07), App(0.06), Clcn3(0.06), Pbx3(0.06), Fgf12(0.04), …
poly(A)-specific ribonuclease activity	0.0305018	0.311917	3.71543e-05	0.000194744	17	0.116082	0.0534925	0.122793	0.00391217	0.0128067	Noct(0.59), Noct(0.59), Pan3(0.22), Pan3(0.22), Pan2(0.2), Pan2(0.2), Cnot6(0.14), Cnot1(0.09), Cnot6l(0.01), Cnot8(0), Cnot8(0), Cnot2(0), Pde12(-0.01), Cnot7(-0.02), Cnot7(-0.02), Toe1(-0.03), Parn(-0.22),
negative regulation of interleukin-12 production	0.0185809	0.370003	3.73271e-05	0.000195285	14	0.19728	0.0211136	0.195643	0.0142855	0.00170771	Mefv(0.9), Thbs1(0.72), Irak3(0.4), Irak3(0.4), Nod2(0.4), Nod2(0.4), Jak3(0.29), Cmklr1(0.19), Arrb2(0.19), Tlr2(0.14), Nlrc3(0.13), Pibf1(-0.09), Acp5(-0.45), C1qbp(-0.61),
axon extension involved in axon guidance	0.0181323	0.443959	3.74214e-05	0.000195285	10	0.268852	0.0415005	0.00454647	0.00831027	0.0665185	Slit3(0.56), Slit3(0.56), Sema3a(0.42), Sema3f(0.39), Nrp2(0.38), Slit2(0.31), Slit2(0.31), Nrp1(-0.19), Tpbgl(-0.25), Smo(-0.26),
histone acetyltransferase binding	0.0255896	0.240358	3.74232e-05	0.000195285	30	0.119552	0.0621301	0.0349188	0.0104329	0.021804	Nr4a3(0.99), Egr1(0.48), Epas1(0.48), Gli3(0.43), Ets1(0.41), Myocd(0.37), Apbb2(0.34), Hif1a(0.34), Cited2(0.27), Pla2g4a(0.27), Mef2a(0.26), Kansl1(0.26), Kansl1l(0.23), Sp1(0.22), Creb1(0.19), Taf7(0.15), Taf7(0.15), Trim68(0.15), Kat2b(0.12), Cebpb(0.1), Zbtb7a(0.08), Mtf1(0.08), Bcas3(0.03), Trip4(-0.05), Sirt2(-0.08), Eid1(-0.1), Apbb1(-0.11), Pcna(-0.11), Ecd(-0.24), Trp53(-0.49),
smooth muscle tissue development	0.01583	0.335578	3.79049e-05	0.000197508	16	0.373664	0.109696	0.000914859	0.00908327	0.0344061	Tshz3(0.4), Tiparp(0.39), Itga8(0.39), Stra6(0.37), Schip1(0.36), Foxp1(0.34), Zfand5(0.32), Nf1(0.29), Ahr(0.28), Trp63(0.27), Eng(0.2), Pdgfrb(0.19), Zfp950(0.17), Dlg1(0.06), Bmp4(0.01), Ihh(-0.51),
negative regulation of calcium ion transport	0.0260741	0.410365	3.82872e-05	0.000199206	10	0.0705264	0.0440949	0.00851506	0.150444	0.012356	Ptgs2(1.16), Stc1(0.69), Gnao1(0.53), Nos3(0.51), Pacsin3(0.27), Inpp5k(0.1), Nos1(0.01), Icam1(-0.13), Cav3(-0.19), Cav3(-0.19),
embryonic digestive tract morphogenesis	0.0157001	0.355112	3.85058e-05	0.000200049	15	0.342606	0.110085	0.000275475	0.0114845	0.0694015	Sox11(0.57), Foxf1(0.56), Hlx(0.44), Gli3(0.43), Fgfr2(0.32), Tcf7(0.31), Nipbl(0.29), Ovol2(0.29), Pdgfra(0.27), Tcf7l2(0.23), Tcf21(0.22), Hnf1b(0.14), Id2(0.07), Pitx2(-0.17), Ihh(-0.51),
HMG box domain binding	0.018528	0.35501	3.88278e-05	0.000201427	14	0.487131	0.0932017	0.000411293	0.00793389	0.0422375	Jun(0.69), Egr2(0.36), Hivep1(0.34), Hhex(0.31), Mef2c(0.26), Sp1(0.22), Gata3(0.18), Meox1(0.12), Hoxc4(0.07), Tcf12(0.07), Hoxa3(0.05), Pou3f3(0.05), Prrx1(-0.02), Cebpa(-0.08),
negative regulation of protein processing	0.0302166	0.371071	3.95853e-05	0.000205055	12	0.0191802	0.0347508	0.0526368	0.0842629	0.02603	Il1r2(1.04), Ctla2a(0.61), Serpine2(0.41), Cdh1(0.38), Glg1(0.23), Glg1(0.23), Lrrk2(0.23), Chac1(0.11), Mdm2(0.07), Snx12(0.04), Gas1(-0.03), Tmem59(-0.11),
cellular response to epidermal growth factor stimulus	0.028038	0.257428	3.99737e-05	0.000206764	25	0.044529	0.00857649	0.154676	0.024415	0.0400727	Ptpn12(0.39), Zfp36(0.37), Zfp36l1(0.32), Dab2ip(0.3), Snai2(0.27), Egfr(0.25), Erbb2(0.25), Iqgap1(0.22), Iqgap1(0.22), Plcg1(0.2), Garem1(0.2), Zfp36l2(0.18), Bag4(0.16), Rasa1(0.12), Pdpk1(0.1), Inpp5k(0.1), Stat5b(0.07), Med1(0.05), Sox9(0.04), Sox9(0.04), Dab2(-0.08), Akt1(-0.13), Eef1a1(-0.23), Zpr1(-0.25), Vil1(-0.3),
positive regulation of erythrocyte differentiation	0.0285309	0.284626	4.04821e-05	0.000209089	21	0.160966	0.0491621	0.0388579	0.0368088	0.00443641	Inhba(1.17), Ets1(0.41), Inpp5d(0.37), Tal1(0.35), Tal1(0.35), Hif1a(0.34), Acvr1b(0.29), Gata2(0.2), Kdm1a(0.17), Nckap1l(0.16), Acvr2a(0.1), Foxo3(0.1), Id2(0.07), Stat5b(0.07), Med1(0.05), Ankrd54(0.01), Mapk14(0), Mapk14(0), Smap1(-0.12), Hmgb2(-0.22), Isg15(-0.42),
activation of GTPase activity	0.0224913	0.156175	4.29061e-05	0.000221285	71	0.0656656	0.0163135	0.0642724	0.0554839	0.0215341	Foxj1(0.67), Cxcl13(0.61), Tbc1d10c(0.49), Tbc1d9(0.48), Epha2(0.41), Ntrk3(0.35), Arhgef10(0.32), Tiam1(0.31), Tiam1(0.31), Sgsm1(0.31), Epha1(0.3), Ndel1(0.29), Grtp1(0.27), Tsc1(0.23), Evi5l(0.23), Tbc1d2b(0.22), Dock7(0.19), Rasgrp1(0.18), Rasgrp1(0.18), Gpr65(0.17), Usp6nl(0.17), Tbc1d10a(0.16), Tbc1d1(0.15), Tbc1d2(0.15), Tbc1d8b(0.13), Ptk2b(0.12), Rasa1(0.12), Tbc1d15(0.11), Tbc1d4(0.11),…
positive regulation of cardiac muscle cell differentiation	0.0221571	0.435779	4.30382e-05	0.000221643	10	0.460768	0.0112498	0.0476714	0.00902801	0.00894274	Efnb2(0.48), Myocd(0.37), Foxp1(0.34), Tgfb1(0.28), Mef2c(0.26), Mef2c(0.26), Gsk3b(0.22), Arrb2(0.19), Nrg1(-0.26), Grem1(-0.47),
cell migration involved in sprouting angiogenesis	0.0197979	0.342022	4.36527e-05	0.000224481	16	0.210516	0.012837	0.0525766	0.0351423	0.0105323	Nr4a1(0.58), Egr3(0.54), Kdr(0.51), Efnb2(0.48), Fgf2(0.31), Slit2(0.31), Vegfa(0.29), Robo1(0.28), Srf(0.16), Srf(0.16), Itgb1(0.11), Ephb4(0.04), Gpld1(-0.02), Nrp1(-0.19), Nrp1(-0.19), Grem1(-0.47),
positive regulation of protein autophosphorylation	0.0315483	0.293249	4.43192e-05	0.000227577	19	0.0247802	0.0821387	0.141627	0.011098	0.0201704	Ngf(0.54), Rassf2(0.47), Pdgfb(0.45), Pdgfb(0.45), Vegfa(0.29), Pdgfa(0.28), Pdgfa(0.28), Src(0.26), Rap2b(0.2), Rap2a(0.11), Rap2a(0.11), Pdgfd(0.04), Pdgfc(0.03), Rad50(-0.02), Rap2c(-0.06), Nbn(-0.07), Mre11a(-0.08), Vegfc(-0.18), Tom1l1(-0.19),
phosphatase activity	0.0343577	0.128233	4.43834e-05	0.000227577	100	0.0852038	0.0439495	0.090583	0.0196785	0.0110405	Dusp10(0.72), Dusp1(0.57), Car3(0.52), Ptpn22(0.52), Acpp(0.44), Ptprj(0.43), Ptpn14(0.42), Ptpn12(0.39), Ptprb(0.39), Ptprm(0.38), Dusp14(0.36), Dusp7(0.36), Dusp6(0.35), Dusp5(0.35), Dusp8(0.32), Ptpn13(0.31), Ptprc(0.31), Ctdspl2(0.31), Ctdsp2(0.27), Ptpru(0.26), Ssh2(0.26), Ptprd(0.25), Ptprg(0.25), Ptpn21(0.25), Ssh1(0.24), Ptpn18(0.23), Ctdspl(0.23), Ptpdc1(0.22), Dusp4(0.22), Dusp16(0.21),…
ligand-dependent nuclear receptor binding	0.0337684	0.267323	4.46419e-05	0.000228572	24	0.0137169	0.0496056	0.0286507	0.105419	0.0396567	Prox1(0.36), Arid1a(0.31), Ncoa3(0.24), Ncoa3(0.24), Ncor2(0.23), Ncor2(0.23), Ncoa2(0.22), Ncoa2(0.22), Jund(0.21), Ncor1(0.14), Ncoa1(0.13), Ncoa1(0.13), Ppargc1a(0.09), Trim24(0.08), Med1(0.05), Sra1(0), Nrbf2(0), Slc30a9(-0.02), Tada3(-0.03), Trip4(-0.05), Smarce1(-0.08), Uba3(-0.09), C1d(-0.13), Mecr(-0.31),
autophagosome assembly	0.0294441	0.203679	4.55654e-05	0.000232963	54	0.00535423	0.0356734	0.120048	0.0202176	0.120894	Wipi1(0.35), Trp53inp1(0.35), Atg16l2(0.32), Ulk1(0.24), Atg14(0.21), Atg14(0.21), Rb1cc1(0.2), Trp53inp2(0.2), Trp53inp2(0.2), Ctsd(0.17), Atg2a(0.15), Rab23(0.11), Rab23(0.11), Atg12(0.09), Atg13(0.08), Atg13(0.08), Map1lc3b(0.08), Atg9a(0.08), Atg9a(0.08), Atg9a(0.08), Atg101(0.07), Atg101(0.07), Rab1a(0.06), Stx12(0.04), Gabarapl1(0.03), Trappc8(0.03), Atg16l1(0.03), Atg2b(0.01), Atg4d(0.01),…
phagocytosis	0.0191846	0.207096	4.56459e-05	0.000233038	44	0.0857184	0.102385	0.0432895	0.0365174	0.00456808	Tub(0.7), Anxa1(0.33), Slc11a1(0.31), Abl2(0.3), Abl2(0.3), Mertk(0.3), Pik3ca(0.28), Gulp1(0.27), Pecam1(0.26), Itgal(0.24), Syt7(0.23), Dock1(0.23), Gata2(0.2), Abca7(0.2), Abl1(0.19), Abl1(0.19), Itgb2(0.18), Axl(0.17), Axl(0.17), Coro1a(0.15), Unc13d(0.15), Anxa3(0.1), Lepr(0.1), Elmo1(0.08), Vav1(0.07), Rab5a(0.07), Cdc7(0.06), Pip5k1c(0.06), Dnm2(0.05), Cdc42se2(0.04), Csnk1a1(0.03), Myo7a(…
negative regulation of anoikis	0.026655	0.334723	4.71458e-05	0.000240349	15	0.183322	0.138819	0.0349066	0.00365726	0.012296	Ntrk2(0.94), Notch1(0.64), Itga5(0.48), Pik3ca(0.28), Snai2(0.27), Src(0.26), Bcl2(0.24), Mcl1(0.21), Tle1(0.21), Cav1(0.16), Cav1(0.16), Itgb1(0.11), Pdk4(0.04), Ptk2(-0.06), Ptrh2(-0.34),
toll-like receptor signaling pathway	0.0127852	0.321544	4.78454e-05	0.000243564	22	0.829071	0.0441452	0.0119165	0.00994036	0.00036097	Tlr6(0.88), Tlr6(0.88), Tlr8(0.71), Tlr8(0.71), Tlr4(0.55), Tlr4(0.55), Tlr5(0.44), Tlr7(0.44), Rps6ka3(0.27), Tlr1(0.26), Tlr1(0.26), Cd86(0.16), Tlr2(0.14), Irak2(0.11), Mapkapk3(0.09), Tlr3(-0.01), Tlr3(-0.01), Mapkapk2(-0.03), Traf3(-0.08), Unc93b1(-0.23), Tlr9(-0.46), Tlr9(-0.46),
negative regulation of myotube differentiation	0.0229716	0.380858	4.8225e-05	0.000245144	12	0.0149474	0.015105	0.0952444	0.154642	0.0199611	Bhlhe41(0.74), Notch1(0.64), Ankrd2(0.57), Ankrd2(0.57), Myocd(0.37), Nov(0.34), Hdac4(0.27), Hdac5(0.22), Trim72(0.2), Daxx(-0.1), Plpp7(-0.23), Plpp7(-0.23),
cation channel activity	0.0256235	0.252537	4.83754e-05	0.000245555	28	0.507458	0.0112783	0.0159479	0.0260416	0.00896144	Trpm6(0.83), Piezo2(0.58), Cacna1h(0.45), Trpm2(0.39), Pkd1l3(0.36), Fam26e(0.26), Pkd1(0.25), Trpc1(0.23), Calhm2(0.17), P2rx1(0.15), P2rx1(0.15), Piezo1(0.15), Piezo1(0.15), Asic2(0.14), Asic2(0.14), Grin2d(0.13), Trpm7(0.08), Trpc6(0.04), Tmem38a(0.02), Mcoln1(-0.01), Asic1(-0.02), Asic1(-0.02), Tmem38b(-0.08), Trpv2(-0.13), Trpv2(-0.13), Trpv4(-0.16), Trpm3(-0.18), Grin3b(-0.37),
protein kinase inhibitor activity	0.0317793	0.186191	4.91005e-05	0.000248879	47	0.0443868	0.0330648	0.0248128	0.0237617	0.110242	Socs3(0.85), Itprip(0.55), Trib1(0.51), Nyx(0.46), Flrt3(0.45), Socs5(0.44), Sh3bp5(0.42), Sh3bp5(0.42), Pkib(0.39), Rtn4rl2(0.38), Socs2(0.36), Dcn(0.27), Flrt2(0.26), Cish(0.22), Socs1(0.22), Trib2(0.21), Socs7(0.18), Flrt1(0.18), Camk2n1(0.17), Socs6(0.16), Socs4(0.16), Podn(0.16), Cdkn1a(0.15), Cdkn1b(0.14), Lrrc66(0.12), Bgn(0.11), Cdkn1c(0.09), Wnk1(0.06), Sh3bp5l(0.05), Prkrip1(0.03), Dnaj…
positive regulation of collagen biosynthetic process	0.0231254	0.278821	4.93452e-05	0.000249761	23	0.123224	0.0160246	0.0614514	0.0531606	0.0123421	Pdgfb(0.45), Itga2(0.44), Ctgf(0.35), Ep300(0.33), Tgfb3(0.3), Tgfb1(0.28), Tgfb1(0.28), Ccl2(0.27), Rgcc(0.27), Cbx8(0.23), Eng(0.2), Pdgfrb(0.19), Ltbp1(0.19), F2r(0.17), Suco(0.07), Il18(0.04), Bmp4(0.01), Scx(-0.14), Scx(-0.14), Serpinf2(-0.19), Serpinf2(-0.19), Wnt4(-0.5), Ihh(-0.51),
atrioventricular valve morphogenesis	0.0227304	0.404912	4.97284e-05	0.000251342	11	0.272729	0.0427249	0.00793592	0.0218858	0.0255894	Notch1(0.64), Hey1(0.43), Bmp2(0.34), Heyl(0.29), Cyr61(0.26), Mdm4(0.24), Tgfb2(0.23), Acvr1(0.14), Zfpm1(0.12), Zfpm2(0.12), Mdm2(0.07),
profilin binding	0.0272129	0.392391	5.03029e-05	0.000253882	11	0.106386	0.127238	0.0180548	0.0475098	0.00545381	Dbn1(0.4), Pclo(0.34), Fmnl1(0.3), Rhoq(0.22), Diaph1(0.18), Htt(0.15), Evl(0.14), Vasp(0.12), Enah(0.07), Cttn(0.03), Cyfip1(0.01),
receptor-mediated endocytosis	0.0359938	0.18335	5.06556e-05	0.000255298	48	0.0645255	0.00560216	0.0378524	0.0770819	0.0753172	Slc9a3(0.73), Pla2r1(0.56), Mrc1(0.51), Adrb2(0.47), Lrp1(0.45), Cd300a(0.34), Cd14(0.3), Micall1(0.3), Scarf1(0.27), Picalm(0.24), Picalm(0.24), Cltc(0.22), Lrp2(0.21), Lrp2(0.21), Ldlrap1(0.21), Msr1(0.2), Clec9a(0.19), Clec9a(0.19), Pld2(0.15), Fcgr2b(0.14), Tgfbr2(0.14), Hip1r(0.13), Hip1r(0.13), Cubn(0.13), Cubn(0.13), Apoe(0.11), Cxcl16(0.09), Scara5(0.09), Cln3(0.07), Dnm2(0.05), Cttn(0.03…
dendritic spine development	0.0306261	0.280955	5.07463e-05	0.000255392	21	0.237669	0.0960738	0.0354718	0.00250445	0.0196413	Pak3(0.97), Ephb3(0.69), Ephb2(0.35), Nck2(0.24), Ephb1(0.23), Ephb1(0.23), Acsl4(0.19), Pak2(0.11), Srgap2(0.1), Srgap2(0.1), Slc12a5(0.1), Git1(0.08), Fmr1(0.07), Pak1(0.06), Arid1b(0.06), Pak4(0.03), Spire1(0.02), Arf4(-0.07), Arf4(-0.07), Slc9a6(-0.07), Uba6(-0.09),
neuropeptide signaling pathway	0.00941854	0.369066	5.15104e-05	0.000258869	19	0.647343	0.0994625	0.000166859	0.00575087	0.0482244	Gal(1.01), Nmb(0.6), Ltb4r1(0.58), Npy(0.48), Rapgef2(0.36), Rapgef2(0.36), Scg5(0.3), Penk(0.27), Kiss1r(0.23), Tac1(0.22), Cysltr1(0.22), Calca(0.17), Hcrtr1(0.12), Sort1(0.09), Grp(0.01), Npff(-0.02), Crcp(-0.07), Galr3(-0.09), Mchr1(-0.64),
peptidyl-tyrosine dephosphorylation	0.0238681	0.272046	5.19325e-05	0.00026062	23	0.0440913	0.0368701	0.208544	0.0369582	0.00483895	Ptprj(0.43), Ptpn12(0.39), Dusp14(0.36), Dusp7(0.36), Dusp6(0.35), Dusp5(0.35), Ptpn13(0.31), Dusp4(0.22), Ptpro(0.2), Ptpro(0.2), Ptpn1(0.19), Ptpn1(0.19), Ptpn11(0.16), Ubash3b(0.16), Ptpn2(0.11), Ptpn2(0.11), Ptprs(0.11), Ptprf(0.07), Dusp3(-0.1), Dusp18(-0.18), Dusp18(-0.18), Pgp(-0.34), Dusp28(-0.34),
adenylate cyclase-inhibiting G-protein coupled receptor signaling pathway	0.019559	0.267268	5.24814e-05	0.000263001	26	0.475232	0.0212491	0.0105111	0.0258346	0.00992648	P2ry12(0.74), Htr1b(0.65), S1pr1(0.59), S1pr1(0.59), Insl3(0.57), Adcy1(0.48), S1pr3(0.43), Adora1(0.32), Adcy3(0.29), Adcy4(0.28), Adcy9(0.19), Gnaz(0.14), Lpar1(0.14), Gabbr1(0.14), Gnai3(0.11), Npr3(0.11), Npr3(0.11), Adcy6(0.09), Adcy7(0.01), Casr(-0.06), Galr3(-0.09), Gnai2(-0.09), Gnai2(-0.09), Ric8a(-0.09), P2ry1(-0.16), Psap(-0.3),
negative regulation of canonical Wnt signaling pathway	0.0272574	0.12913	5.2817e-05	0.000264309	108	0.295585	0.041388	0.00913539	0.0143927	0.0320556	Nog(0.96), Nkd2(0.68), Notch1(0.64), Wnt11(0.6), Wnt11(0.6), Egr1(0.48), Gli3(0.43), Sfrp2(0.4), Sfrp2(0.4), Sfrp2(0.4), Dact1(0.4), Dact1(0.4), Cdh1(0.38), Apc(0.35), Apc(0.35), Frzb(0.34), Frzb(0.34), Apc2(0.34), Apc2(0.34), Dab2ip(0.3), Mcc(0.29), Ddit3(0.27), Snai2(0.27), Lats2(0.26), Lats2(0.26), Foxo1(0.25), Tcf7l2(0.23), Dkk2(0.23), Sox17(0.22), Jade1(0.22), Ptpro(0.2), Nphp3(0.19), Nkd1(0…
protein K11-linked deubiquitination	0.0179125	0.406615	5.37292e-05	0.000268494	11	0.00700972	0.0109355	0.196325	0.117072	0.03098	Tnfaip3(0.54), Tnfaip3(0.54), Otud7b(0.24), Otud7b(0.24), Yod1(0.21), Vcpip1(0.15), Usp37(0.14), Otud3(0.09), Usp30(0.01), Otub2(-0.11), Otub2(-0.11),
positive regulation of cell death	0.0318812	0.20076	5.67161e-05	0.000282838	40	0.0411056	0.0215402	0.0701224	0.0295221	0.0658626	Ptgs2(1.16), Il1b(0.69), Mycn(0.63), Acer2(0.5), Egr1(0.48), Bcl2l11(0.46), Zc3h12a(0.46), Akr1c18(0.44), Alox12(0.42), Mt3(0.4), Ctgf(0.35), Dusp6(0.35), Ep300(0.33), Nradd(0.3), Dnmt3a(0.29), Hp(0.26), Fas(0.19), Irf1(0.17), Cdkn1a(0.15), Cdkn1b(0.14), Lpar1(0.14), Nkx3-1(0.09), Mtor(0.09), Ripk1(0.08), Nod1(0.08), Bmp7(0.07), Trim13(0.04), Txnrd1(0.03), Ucp2(0.02), Bmp4(0.01), Lzts2(-0.02), Ka…
cGMP catabolic process	0.0326964	0.400797	5.67594e-05	0.000282838	10	0.0460233	0.0868051	0.00830109	0.120576	0.0218122	Pde1c(0.62), Pde10a(0.52), Pde9a(0.22), Pde9a(0.22), Pde9a(0.22), Pde2a(0.2), Pde1a(0.14), Pde1b(0.09), Pde5a(-0.16), Pde5a(-0.16),
thiol-dependent ubiquitinyl hydrolase activity	0.0253487	0.175492	5.7294e-05	0.0002851	65	0.00766332	0.0647858	0.0981781	0.0394548	0.0509144	Tnfaip3(0.54), Zc3h12a(0.46), Usp27x(0.38), Usp54(0.31), Usp53(0.31), Usp47(0.29), Zranb1(0.26), Usp2(0.25), Otud7b(0.24), Usp43(0.23), Usp9x(0.22), Usp13(0.22), Yod1(0.21), Uchl1(0.2), Usp42(0.2), Usp11(0.2), Usp33(0.19), Usp34(0.18), Usp12(0.16), Vcpip1(0.15), Cyld(0.15), Usp38(0.15), Usp37(0.14), Otud1(0.13), Otud4(0.13), Usp7(0.11), Usp4(0.1), Otud3(0.09), Usp19(0.07), Usp28(0.07), Usp48(0.06…
regulation of phagocytosis	0.0217457	0.427608	5.78572e-05	0.000287498	10	0.0669158	0.164373	0.0133732	0.0485451	0.0116043	Syk(0.63), Itgav(0.53), Itgav(0.53), Fgr(0.36), Prkcg(0.36), Syt7(0.23), Scarb1(0.17), Pot1b(0.05), Hck(-0.12), Hck(-0.12),
chromatin	0.0355057	0.120404	5.79384e-05	0.000287498	112	0.107575	0.0497902	0.0632451	0.0165026	0.0190947	Chd5(1.05), Plk2(0.7), Jmjd1c(0.68), Hr(0.61), Plk3(0.58), Hmga2(0.4), Sirt1(0.4), Rest(0.39), Ubr2(0.34), Ep300(0.33), Tnrc18(0.31), Klf4(0.3), Ccnd2(0.29), Nipbl(0.29), Sf3b1(0.29), Trp63(0.27), Fam178a(0.27), Kdm3a(0.24), Ncor2(0.23), Fam111a(0.23), Wapl(0.21), Wapl(0.21), Bahd1(0.21), Mbd4(0.2), Hmgn3(0.2), Creb1(0.19), Nfe2l2(0.19), Smc3(0.18), Ankrd17(0.18), Kdm3b(0.18), Rad18(0.17), Arrb1(…
positive regulation of chemokine production	0.0224733	0.299827	5.85933e-05	0.000289943	20	0.519079	0.00754874	0.119581	0.00652655	0.00506146	Il6(1.24), Havcr2(0.71), Tlr4(0.55), Tlr4(0.55), Il6ra(0.54), Tlr7(0.44), Adora2b(0.32), P2ry2(0.28), Tlr2(0.14), Tlr2(0.14), Adam17(0.09), Il18(0.04), Ripk2(0.03), Eif2ak2(0.02), Lbp(-0.01), Tlr3(-0.01), Mapk9(-0.13), Tnf(-0.19), Lgals9(-0.24), Tlr9(-0.46),
long-term memory	0.0268787	0.272342	5.85951e-05	0.000289943	23	0.31304	0.0721526	0.00436189	0.0283104	0.0162965	Ntrk2(0.94), Camk4(0.54), Egr1(0.48), Adcy1(0.48), Reln(0.45), Reln(0.45), Ccnd2(0.29), Sgk1(0.26), Mecp2(0.24), Tac1(0.22), Cpeb3(0.2), Eif2ak4(0.17), Srf(0.16), Ntf5(0.15), Pja2(0.12), Mtor(0.09), Btbd9(0.08), Calb1(0.05), Rgs14(0.02), Prkcz(0), Ehmt2(-0.08), Ctns(-0.13), Shank1(-0.53),
cholesterol efflux	0.0307182	0.234036	6.05768e-05	0.000299331	32	0.0401971	0.0198706	0.0141201	0.0162707	0.323299	Apob(0.76), Abca13(0.56), Abcg1(0.51), Abcg1(0.51), Soat2(0.39), Npc1(0.23), Npc1(0.23), Abca5(0.21), Abca7(0.2), Scarb1(0.17), Scarb1(0.17), Scarb1(0.17), Cav1(0.16), Abca1(0.14), Abca1(0.14), Abca1(0.14), Apoe(0.11), Apoe(0.11), Apoe(0.11), Stx12(0.04), Soat1(0), Apoa2(-0.01), Apom(-0.07), Apom(-0.07), Npc2(-0.12), Npc2(-0.12), Abca2(-0.13), Apoa4(-0.26), Apoa4(-0.26), Apoa1(-0.5), Apoa1(-0.5),…
sensory perception of pain	0.0179563	0.209906	6.06716e-05	0.000299381	46	0.31758	0.134429	0.00215734	0.00177321	0.106784	Ptgs2(1.16), Il1rn(0.62), Prx(0.56), Ngf(0.54), Ngf(0.54), Alox5(0.53), Edn1(0.53), Ednrb(0.5), Ednra(0.48), Aloxe3(0.45), Cacna1h(0.45), Cnr2(0.38), P2rx7(0.32), Ptgs1(0.31), P2ry2(0.28), Penk(0.27), Mecp2(0.24), Tac1(0.22), Uchl1(0.2), Chrna4(0.17), Chrna4(0.17), Ngfr(0.14), Mme(0.09), Aqp1(0.08), Adrb1(0.04), Npy1r(0.04), Npy1r(0.04), Cacna1a(0.03), Ndn(0.02), Mapk1(-0.01), Fam134b(-0.01), Hox…
actinin binding	0.0235501	0.376804	6.10007e-05	0.000300586	12	0.262309	0.267921	0.00505889	0.00690312	0.0106753	Ttn(0.57), Pkd2(0.3), Lmo7(0.3), Nfkb1(0.21), Rela(0.21), Rela(0.21), Pdlim5(0.16), Pdlim4(0.09), Micall2(0.05), Trpc6(0.04), Hnrnpk(0.01), Prom1(-0.09),
focal adhesion assembly	0.0332997	0.263647	6.19548e-05	0.000304439	23	0.0216849	0.0324379	0.0582161	0.0647375	0.0515229	Itgav(0.53), Dlc1(0.46), Itga2(0.44), Fermt2(0.34), Pxn(0.29), Taok2(0.25), Bcl2(0.24), Actn1(0.24), Whamm(0.17), Ptk2b(0.12), Arhgap6(0.1), Pdpk1(0.1), Pip5k1a(0.1), Arhgef7(0.1), Tesk2(0.1), Ptprk(0.05), Cttn(0.03), Sorbs1(0.02), Ajuba(-0.03), Thy1(-0.11), Thy1(-0.11), Rhod(-0.27), Rcc2(-0.48),
response to muscle stretch	0.0349643	0.350095	6.24133e-05	0.000306267	13	0.0332816	0.0183089	0.0508176	0.104285	0.0392495	Fos(0.83), Jun(0.69), Ankrd2(0.57), Ankrd1(0.4), Nfkbia(0.33), Nfkb1(0.21), Rela(0.21), Slc9a1(0.09), Raf1(0.07), Dmd(0.06), Slc8a1(0.01), Mapk14(0), Chuk(-0.02),
hemostasis	0.0219846	0.243562	6.33038e-05	0.000310206	33	0.143706	0.0557421	0.151799	0.00635844	0.00830908	Thbd(0.8), P2ry12(0.74), F10(0.62), F13a1(0.52), F5(0.49), Pros1(0.39), F3(0.38), Proz(0.29), Kng1(0.27), Tfpi(0.26), Tfpi2(0.26), Procr(0.25), F2r(0.17), Vwf(0.12), Vwf(0.12), Vwf(0.12), Serpinc1(0.11), Fgg(0.05), Anxa5(0.03), Fgb(0.03), Serping1(0.01), F8(0.01), Enpp4(0), F2rl3(-0.03), Anxa8(-0.06), F13b(-0.06), Anxa7(-0.1), Fga(-0.12), Proc(-0.15), Hrg(-0.2), Serpina10(-0.2), Zfp385a(-0.21), C…
presynaptic active zone	0.0242237	0.275249	6.43313e-05	0.000314805	24	0.106519	0.0162031	0.0226585	0.0117349	0.181438	Ntrk2(0.94), Bsn(0.54), Bsn(0.54), Erc1(0.41), Pclo(0.34), Adora1(0.32), Sv2a(0.23), Unc13a(0.23), Ncoa2(0.22), Adora2a(0.19), Rims3(0.17), Cdh2(0.15), Syn1(0.09), Syn1(0.09), Syp(0.09), Syp(0.09), Grm7(0.08), Gper1(0.03), Shank2(0.03), Fzd3(-0.06), Nufip1(-0.24), Nufip1(-0.24), Rims2(-0.24), Erc2(-0.34),
leukotriene biosynthetic process	0.0104889	0.459071	6.64239e-05	0.000324596	14	0.0564846	0.0855412	0.0401246	0.100773	0.00517132	Syk(0.63), Alox5(0.53), Alox5(0.53), Alox5(0.53), Alox5ap(0.5), Alox5ap(0.5), Alox5ap(0.5), Ggt5(0.07), Ltc4s(-0.05), Ltc4s(-0.05), Pla2g5(-0.08), Ggt1(-0.16), Lta4h(-0.16), Lta4h(-0.16),
protein polyubiquitination	0.0157161	0.154743	6.7043e-05	0.00032717	117	0.013346	0.0660196	0.357515	0.00319805	0.0422456	Rnf125(0.64), Rnf122(0.42), Rnf180(0.38), Rc3h2(0.35), Rnf144b(0.34), Ubr5(0.28), G2e3(0.28), Smurf1(0.27), Rnf19b(0.25), Bcl2(0.24), Tnks(0.23), Peli1(0.23), Rnf19a(0.22), Rnf165(0.21), Rnf111(0.2), Rnf111(0.2), Rnf111(0.2), Bfar(0.19), Topors(0.19), Rnf217(0.18), Huwe1(0.17), Fbxw11(0.17), Fbxw11(0.17), Rnf24(0.16), Jade2(0.16), Jade2(0.16), Mgrn1(0.14), Cul3(0.14), Arih2(0.12), Arih2(0.12), Rn…
bone remodeling	0.0286403	0.33853	6.74034e-05	0.000328476	14	0.0954806	0.0259945	0.00455203	0.0987196	0.0825327	Htr1b(0.65), Rassf2(0.47), Epha2(0.41), Lrp6(0.38), Notch2(0.28), Slc34a1(0.23), Enpp1(0.2), Traf6(0.11), Spp2(0.06), Lrp5(0.05), Lrp5(0.05), Ltbp3(0.05), Mitf(0.01), Lgr4(-0.08),
Wnt-protein binding	0.016356	0.228255	6.85204e-05	0.00033346	40	0.0817243	0.0315699	0.0997573	0.000976606	0.185349	Egf(0.56), Fzd5(0.43), Fzd5(0.43), Sfrp2(0.4), Lrp6(0.38), Lrp6(0.38), Frzb(0.34), Frzb(0.34), Fzd4(0.29), Fzd4(0.29), Ror1(0.28), Trabd2b(0.23), Fzd2(0.22), Ptpro(0.2), Porcn(0.18), Sfrp4(0.16), Sfrp4(0.16), Fzd1(0.09), Fzd1(0.09), Fzd8(0.07), Lrp5(0.05), Lrp5(0.05), Fzd7(0.03), Fzd7(0.03), Sfrp1(0.02), Sfrp1(0.02), Fzd6(0), Wls(-0.03), Wls(-0.03), Fzd3(-0.06), Fzd3(-0.06), Wif1(-0.1), Ryk(-0.12…
negative regulation of neurogenesis	0.03231	0.275582	6.96706e-05	0.000338592	22	0.124466	0.165185	0.0231031	0.015389	0.0126048	Il1b(0.69), Notch1(0.64), Mt3(0.4), Rest(0.39), Sorl1(0.36), Cd24a(0.34), Kdm1a(0.17), Kdm1a(0.17), Hook3(0.14), Hes1(0.12), Arhgef2(0.12), Bmp7(0.07), Wnt7a(0.07), Trim11(0.06), Pcm1(0.05), Wnt7b(0.04), Bmpr1a(0.01), Ctdsp1(-0.01), Ctdsp1(-0.01), Ctdsp1(-0.01), Dynlt1b(-0.03), Atf5(-0.49),
negative regulation of Wnt signaling pathway	0.0160845	0.200646	7.09352e-05	0.000344264	53	0.346409	0.0252997	0.0109581	0.0228262	0.0309036	Cxxc4(0.74), Nkd2(0.68), Lrp1(0.45), Hmga2(0.4), Sfrp2(0.4), Sfrp2(0.4), Dact1(0.4), Dact1(0.4), Lrp6(0.38), Apc(0.35), Apc(0.35), Frzb(0.34), Frzb(0.34), Frzb(0.34), Csnk1e(0.32), Dkk2(0.23), Med12(0.23), Trabd2b(0.23), Sox17(0.22), Sox17(0.22), Nkd1(0.19), Nfatc4(0.15), Chd8(0.14), Fgf9(0.12), Tax1bp3(0.09), Rnf43(0.07), Rnf43(0.07), Hic1(0.05), Znrf3(0.04), Tsc2(0.03), Tsc2(0.03), Sfrp1(0.02),…
negative regulation of axon extension involved in axon guidance	0.0216715	0.282806	7.37326e-05	0.000357351	25	0.359031	0.191713	0.000697564	0.021979	0.020489	Sema3e(0.69), Sema6d(0.65), Sema4c(0.62), Sema3a(0.42), Sema3a(0.42), Sema6b(0.42), Sema3f(0.39), Sema3f(0.39), Sema5b(0.39), Sema3d(0.31), Sema3g(0.3), Sema6a(0.26), Sema4b(0.22), Sema4g(0.22), Sema5a(0.03), Sema5a(0.03), Sema4d(0.01), Sema4a(-0.07), Ryk(-0.12), Sema3b(-0.14), Plxna3(-0.18), Nrp1(-0.19), Nrp1(-0.19), Wnt5a(-0.3), Sema3c(-0.46),
establishment of epithelial cell polarity	0.0327349	0.324735	7.54825e-05	0.000365331	15	0.0669865	0.0885979	0.0185944	0.062883	0.0221748	Gja1(0.63), Frmd4a(0.45), Hey1(0.43), Cyth1(0.26), Fermt1(0.2), Cyth3(0.16), Mpp5(0.16), Vangl2(0.16), Frmd4b(0.14), Hes1(0.12), Sipa1l3(0.06), Sipa1l3(0.06), Fbf1(0.04), Arf6(0.03), Pard3(-0.06),
inositol 1,4,5 trisphosphate binding	0.028262	0.399771	7.74879e-05	0.000374525	10	0.225166	0.109274	0.0100991	0.0800026	0.00301639	Itpr3(0.62), Itpr3(0.62), Plcl1(0.27), Itpr2(0.26), Itpr2(0.26), Trpc1(0.23), Itpr1(0.04), Trpc6(0.04), Cyth2(0.01), Trpc3(-0.15),
cell-substrate adhesion	0.0133458	0.331943	8.05457e-05	0.000388773	19	0.200743	0.517451	0.0258179	0.000499113	0.00808632	Itgb3(0.67), Itgav(0.53), Itga5(0.48), Itga2(0.44), Smad6(0.36), Prkx(0.29), Ttyh1(0.29), Angpt1(0.25), Itga6(0.24), Ephb1(0.23), Ppard(0.16), Coro1a(0.15), Vwf(0.12), Vwf(0.12), Itgb1(0.11), Sorbs3(0.08), Myo1g(-0.07), Gas6(-0.35), Rpl29(-0.37),
transcription from RNA polymerase II promoter	0.0339539	0.11837	8.06638e-05	0.000388813	113	0.00886234	0.0631398	0.04076	0.170578	0.0327009	Fosb(1.12), Chd5(1.05), Fos(0.83), Jun(0.69), Fosl2(0.6), Hivep3(0.59), Nfil3(0.54), Junb(0.5), Egr1(0.48), Gata6(0.43), Hivep2(0.43), Nfat5(0.41), Smad3(0.4), Glis3(0.4), Esr1(0.37), Zfp516(0.37), Egr2(0.36), Med13l(0.36), Hif1a(0.34), Lcor(0.33), Bmpr2(0.32), Klf4(0.3), Elf3(0.29), Ovol2(0.29), Ahr(0.28), Ahr(0.28), Zfp217(0.26), Ovol1(0.25), Klf13(0.24), Polr2a(0.23), Prdm4(0.23), Jund(0.21), …
neuromuscular junction	0.0118859	0.193371	8.23692e-05	0.000396493	56	0.411635	0.0288812	0.000495794	0.0115149	0.23019	Musk(0.67), Musk(0.67), Dok7(0.64), Cdk5r1(0.59), Utrn(0.5), Utrn(0.5), Prkcq(0.46), Serpine2(0.41), Myh9(0.39), Sync(0.39), Ptn(0.36), Thbs4(0.35), Pclo(0.34), P2rx7(0.32), Epha4(0.29), Nefm(0.29), Fchsd1(0.29), Kcnn3(0.27), Hdac4(0.27), Sv2a(0.23), Unc13a(0.23), Myh10(0.21), F2r(0.17), Fchsd2(0.17), Camk2d(0.15), Itgb1(0.11), Itgb1(0.11), Unc13b(0.1), Ascc1(0.08), Ppp1r9a(0.08), Des(0.07), Cib2…
retinoic acid receptor signaling pathway	0.0228582	0.304468	8.33425e-05	0.000400633	18	0.0584566	0.0775387	0.0106887	0.062087	0.055927	Kmt2e(0.38), Rarb(0.34), Pml(0.32), Rarg(0.27), Rarg(0.27), Actn4(0.16), Cyp26b1(0.16), Cyp26b1(0.16), Aldh1a2(0.14), Aldh1a2(0.14), Rara(0.14), Rxra(0.07), Rxra(0.07), Rxra(0.07), Esrrg(0.05), Nr1h2(-0.01), Snw1(-0.04), Rxrb(-0.12),
tau-protein kinase activity	0.0362956	0.349363	8.44963e-05	0.000405628	13	0.122798	0.0309965	0.032592	0.0590131	0.0240724	Phkg1(0.52), Brsk1(0.37), Brsk1(0.37), Brsk1(0.37), Gsk3b(0.22), Gsk3b(0.22), Mark1(0.15), Csnk1d(0.12), Mark4(0.12), Mark2(0.06), Prkaa1(0.02), Gsk3a(-0.06), Cdk5(-0.09),
cellular glucose homeostasis	0.0423426	0.374639	8.66243e-05	0.00041528	11	0.0257784	0.118836	0.0730674	0.0401455	0.0193778	Hk2(0.79), Hk3(0.53), Sirt1(0.4), Hkdc1(0.4), Hk1(0.29), Tcf7l2(0.23), Pik3r1(0.19), Alms1(0.1), Nucks1(0.07), Raf1(0.07), Pik3r2(-0.13),
positive regulation of axon extension	0.0383174	0.202986	8.67496e-05	0.000415318	38	0.0173756	0.0302403	0.124623	0.0896568	0.0279155	Islr2(0.87), Ngf(0.54), Ngf(0.54), Sema7a(0.54), Sema7a(0.54), Map1b(0.51), Map1b(0.51), Fn1(0.4), Dbn1(0.4), Ep300(0.33), Cdkl5(0.32), Golga4(0.31), Ndel1(0.29), Gsk3b(0.22), Pafah1b1(0.17), Srf(0.16), Srf(0.16), L1cam(0.12), Apoe(0.11), Rab11a(0.09), Anapc2(0.08), Rufy3(0.07), Mapt(0.06), Mapt(0.06), Limk1(-0.05), Eif4g2(-0.06), Tnfrsf12a(-0.07), Twf2(-0.11), Trpv2(-0.13), Eif2b2(-0.19), Rpl4(-…
regulation of transforming growth factor beta receptor signaling pathway	0.0323531	0.281287	8.75599e-05	0.000418631	20	0.0479975	0.0991882	0.0422102	0.0344861	0.0289971	Smad7(0.41), Smad7(0.41), Smad3(0.4), Smad3(0.4), Zeb1(0.4), Zfp703(0.31), Zfp703(0.31), Itga3(0.3), Tgfb1(0.28), Trim33(0.25), Eng(0.2), Eng(0.2), Smad4(0.05), Smad2(-0.03), Zfyve9(-0.03), Folr1(-0.05), Cav3(-0.19), Eid2(-0.23), Dand5(-0.32), Nrep(-0.61),
photoreceptor cell maintenance	0.0351604	0.22435	8.7687e-05	0.000418673	31	0.0947703	0.129127	0.0148072	0.0383961	0.0226091	Crocc(0.74), Tub(0.7), Pde6a(0.47), Adgrv1(0.41), Abca4(0.37), Iqcb1(0.37), Iqcb1(0.37), Nxnl2(0.31), Map1a(0.26), Ercc6(0.23), Lca5(0.21), Cep290(0.2), Cep290(0.2), Nphp3(0.19), Bbs1(0.12), Bbs4(0.1), Bbs4(0.1), Mdm1(0.08), Cib2(0.07), Clcn3(0.06), Bbs2(0.06), Spata7(0.01), Cln8(-0.05), Ush1c(-0.05), Nphp4(-0.05), Dram2(-0.07), Dram2(-0.07), Prom1(-0.09), Bbs12(-0.12), Mkks(-0.3), Bbs10(-0.35),
cardiac muscle cell differentiation	0.0243198	0.239401	8.7866e-05	0.000418962	31	0.288011	0.054569	0.00123947	0.17295	0.0119415	Xirp1(0.65), Akap13(0.48), Gata6(0.43), Gata6(0.43), Gata6(0.43), Kdm6b(0.43), Myocd(0.37), Tbx3(0.35), Bmp2(0.34), Bmp2(0.34), Foxp1(0.34), Arid1a(0.31), Sik1(0.28), Mef2c(0.26), Mef2c(0.26), Tsc1(0.23), Nox4(0.16), Itgb1(0.11), Slc9a1(0.09), Rxra(0.07), Sox6(0.03), Prox2(0.02), Bmp4(0.01), Bmp4(0.01), Ift88(-0.05), Acadm(-0.13), Cacybp(-0.16), Pitx2(-0.17), Ift20(-0.18), Cby1(-0.24), Kat2a(-0.4…
myosin complex	0.0206885	0.227868	8.8743e-05	0.000422574	33	0.0182014	0.0072778	0.0378309	0.52809	0.0161137	Myh4(0.81), Bmf(0.48), Bmf(0.48), Myh9(0.39), Myo1b(0.39), Myo3b(0.39), Myo1e(0.3), Myo9b(0.26), Myo10(0.25), Myh10(0.21), Myh11(0.19), Myo6(0.19), Myo1d(0.17), Cgnl1(0.16), Mylpf(0.15), Myo1c(0.11), Myh14(0.11), Ccdc102a(0.1), Myo9a(0.1), Myo5a(0.09), Myo5b(0.08), Myo7b(0.07), Cgn(0.07), Myo7a(0.01), Myo18a(0), Dynll2(-0.05), Myl6(-0.06), Myl6b(-0.06), Myo1g(-0.07), Myl12b(-0.08), Myo19(-0.1), M…
SNAP receptor activity	0.0426949	0.204623	8.93194e-05	0.000424747	45	0.0581379	0.0493958	0.0812758	0.0560981	0.0148795	Stx1b(0.69), Stx11(0.68), Stx1a(0.34), Stx5a(0.18), Stx5a(0.18), Stx2(0.17), Stx6(0.14), Gosr2(0.11), Vamp2(0.07), Stx17(0.07), Stx17(0.07), Stx12(0.04), Gosr1(0.03), Gosr1(0.03), Stx16(0.02), Stx16(0.02), Stx3(0), Stx3(0), Sec22b(-0.01), Snap23(-0.01), Snap23(-0.01), Bet1l(-0.01), Bet1l(-0.01), Ykt6(-0.01), Ykt6(-0.01), Stx4a(-0.02), Stx4a(-0.02), Vamp1(-0.02), Vamp4(-0.03), Stx7(-0.03), Stx7(-0…
positive regulation of smooth muscle contraction	0.0130637	0.314205	9.18839e-05	0.000435771	21	0.0868321	0.0336566	0.0923525	0.0191331	0.0379353	Ptgs2(1.16), Adra1d(0.66), Edn1(0.53), Edn1(0.53), Itga2(0.44), Ptafr(0.42), Myocd(0.37), Sphk1(0.36), Ptgs1(0.31), Ada(0.24), Adra1b(0.18), F2r(0.17), Srf(0.16), Adra1a(0.06), Adra1a(0.06), Cttn(0.03), Rhoa(-0.05), Chrm3(-0.08), Chrm3(-0.08), Npnt(-0.12), Tbxa2r(-0.23),
negative regulation of blood vessel endothelial cell migration	0.0240595	0.382001	9.41834e-05	0.000446079	12	0.174389	0.0402113	0.021789	0.0302338	0.0384414	Thbs1(0.72), Vash1(0.57), Angpt2(0.56), Dll4(0.44), Fgf2(0.31), Tgfb1(0.28), Rgcc(0.27), Acvrl1(0.11), Angpt4(0.11), Apoe(0.11), Csnk2b(-0.17), Hrg(-0.2),
chondrocyte differentiation	0.0259921	0.216283	9.60277e-05	0.000454206	40	0.651906	0.00949787	0.0178059	0.0182456	0.0142275	Col11a2(0.83), Arid5a(0.61), Runx1(0.44), Hspg2(0.4), Fgfr1(0.36), Osr2(0.36), Bmp2(0.34), Nov(0.34), Runx2(0.29), Runx2(0.29), Tgfb1(0.28), Creb3l2(0.28), Runx3(0.27), Mef2c(0.26), Mustn1(0.23), Bmpr1b(0.18), Bmpr1b(0.18), Fgf9(0.12), Fgf9(0.12), Mef2d(0.1), Nfib(0.1), Osr1(0.08), Wnt7a(0.07), Sox9(0.04), Trps1(0.02), Bmp4(0.01), Bmpr1a(0.01), Mapk14(0), Mapk14(0), Gpld1(-0.02), Ift80(-0.04), If…
response to stimulus	0.0194467	0.219793	9.8006e-05	0.000462944	40	0.283606	0.135673	0.00036883	0.0360031	0.0693098	Rdh12(0.79), Tub(0.7), Rgs9(0.58), Piezo2(0.58), Hmcn2(0.51), Rorb(0.49), Pde6a(0.47), Nyx(0.46), Cry2(0.44), Dll4(0.44), Adgrv1(0.41), Myo3b(0.39), Abca4(0.37), Cnnm4(0.3), Adcy3(0.29), Scnn1a(0.27), Scnn1b(0.16), Irx5(0.16), Rpgrip1(0.12), Opn3(0.1), Tas1r3(0.1), Grm7(0.08), Slc8b1(0.04), Rpgr(0.01), Spata7(0.01), Rdh5(0), Rspo3(-0.04), Omp(-0.07), Pdcl(-0.07), Opa1(-0.07), Cry1(-0.08), Unc119(…
chemical synaptic transmission	0.0161475	0.158942	9.89522e-05	0.000466791	76	0.488168	0.0842152	0.000238692	0.0227385	0.077565	Slc6a12(0.73), Sstr4(0.71), Htr1b(0.65), Htr1b(0.65), Cacna1c(0.5), Lrp6(0.38), Lrp6(0.38), Gjc1(0.37), Prkcg(0.36), Pcdhb16(0.31), Gabra3(0.28), Penk(0.27), Cacnb1(0.26), Gria4(0.24), Kcnmb1(0.24), Mecp2(0.24), Slc18a2(0.24), Sv2a(0.23), Slc12a6(0.23), Unc13a(0.23), Cacna1g(0.22), Tac1(0.22), Apba1(0.2), Apba1(0.2), Cacnb3(0.19), Myo6(0.19), Pafah1b1(0.17), Cav2(0.16), Slc12a4(0.16), Grik5(0.13)…
positive regulation of osteoblast proliferation	0.0128675	0.440563	9.98967e-05	0.000470618	11	0.387488	0.0765279	0.00249959	0.0181017	0.0445518	Itgb3(0.67), Itgav(0.53), Bmp2(0.34), Igf1r(0.33), Cyr61(0.26), Tmem119(0.22), Tmem119(0.22), Abl1(0.19), Lrp5(0.05), Hpse(-0.16), Hpse(-0.16),
nitric oxide mediated signal transduction	0.0213969	0.405448	0.000100349	0.000472122	11	0.443911	0.0384187	0.00460627	0.11393	0.00474818	Rasd1(0.75), Nos3(0.51), Mt2(0.48), Nos2(0.45), Mt1(0.42), Gucy1a3(0.16), Apoe(0.11), Gucy1b3(0.1), Nos1(0.01), Nos1(0.01), Cd36(-0.41),
RNA polymerase II distal enhancer sequence-specific DNA binding	0.0213397	0.184507	0.000101468	0.000476751	54	0.326745	0.0220344	0.100433	0.0688526	0.0010284	Nr5a2(0.93), Jun(0.69), Rel(0.66), Tfap2a(0.49), Bach1(0.48), Fli1(0.35), Tal1(0.35), Arid3b(0.34), Zbtb16(0.32), Mef2c(0.26), Spi1(0.24), Med12(0.23), Nfkb1(0.21), Rela(0.21), Chd4(0.21), Gatad2b(0.21), Bach2(0.2), Gata2(0.2), Creb1(0.19), Nfe2l2(0.19), Hoxb5(0.17), H3f3b(0.15), Ikzf1(0.14), Sfpq(0.13), Actb(0.1), Nfatc1(0.1), Hdac1(0.09), Mta2(0.07), H2afz(0.07), Pbx3(0.06), Smarcc2(0.06), Nfe2…
ion transport	0.0201678	0.0730986	0.000102266	0.000479863	381	0.0931463	0.0130021	0.00155856	0.0372991	0.493355	Slc4a1(0.91), Chrnb4(0.9), Kcnc2(0.86), Atp2a1(0.84), Add2(0.83), Trpm6(0.83), Ryr1(0.74), Slc9a3(0.73), Cacna2d2(0.66), Hvcn1(0.66), Steap4(0.65), Kcnt1(0.65), Itpr3(0.62), Slc5a12(0.62), Slc17a4(0.62), Trf(0.61), Slco4a1(0.58), Piezo2(0.58), Gabrb1(0.56), Cacna2d1(0.55), Lrrc8c(0.55), Slc38a4(0.54), Kcnab1(0.53), Slc22a15(0.52), Cacna1c(0.5), Slc10a6(0.49), Slc38a2(0.48), Kcne4(0.47), Best3(0.4…
negative regulation of interleukin-2 production	0.0269212	0.401344	0.000102973	0.000482542	11	0.192583	0.0338601	0.0440579	0.033322	0.0194786	Havcr2(0.71), Havcr2(0.71), Tnfaip3(0.54), Ceacam1(0.41), Nod2(0.4), Hdac7(0.2), Gata3(0.18), Il20rb(0.12), Kat5(0.02), Prnp(-0.1), Nr1h4(-0.14),
neuromuscular junction development	0.0233988	0.246328	0.000103758	0.000485575	31	0.334844	0.0608972	0.00933365	0.0338853	0.0160721	Ntrk2(0.94), Tnc(0.86), Musk(0.67), Musk(0.67), Cacna2d2(0.66), Dok7(0.64), Dok7(0.64), Utrn(0.5), Kalrn(0.39), Lamb2(0.36), Col4a1(0.32), Fgfr2(0.32), Cacnb1(0.26), Erbb2(0.25), Lrrk2(0.23), Unc13a(0.23), Cacnb3(0.19), Als2(0.12), Unc13b(0.1), Cacnb4(0.08), Cacnb2(0.07), Pak1(0.06), Col4a5(-0.04), Agrn(-0.05), Pdzrn3(-0.05), Dvl1(-0.1), Nedd4(-0.14), Rer1(-0.15), Afg3l2(-0.15), Snta1(-0.29), Dna…
T cell differentiation	0.0155467	0.242799	0.000106372	0.000497152	35	0.617856	0.135067	0.0192913	0.0167822	0.000511294	Chd7(0.59), Sox4(0.54), Ptpn22(0.52), Il7r(0.5), Egr1(0.48), Dll4(0.44), Itpkb(0.39), Gimap1(0.37), Ptprc(0.31), Runx2(0.29), Tgfb1(0.28), Bcl2(0.24), Gata3(0.18), Gata3(0.18), Kit(0.17), Sp3(0.17), Pknox1(0.14), Ikzf1(0.14), Jag2(0.13), Ptpn2(0.11), Lepr(0.1), Vav1(0.07), Vav1(0.07), Nfatc3(0.06), Patz1(0.04), Ctnnb1(0.03), Lck(0.03), Prex1(0.03), Ppp3cb(-0.03), Lfng(-0.05), Wwp1(-0.05), Nhej1(-…
insulin receptor substrate binding	0.0338138	0.372331	0.000106732	0.000497965	12	0.0780529	0.0150277	0.040875	0.23065	0.0134103	Igf1r(0.33), Insr(0.32), Jak2(0.31), Pik3ca(0.28), Pik3r1(0.19), Pik3r1(0.19), Pik3cb(0.18), Ptpn11(0.16), Prkcd(0.1), Grb2(0.03), Wdr6(-0.13), Insrr(-0.27),
retinoid X receptor binding	0.0391925	0.259606	0.000106827	0.000497965	23	0.0106887	0.0763945	0.0845328	0.151128	0.0161463	Nrip1(0.39), Rarb(0.34), Rarg(0.27), Fus(0.26), Nsd1(0.24), Pparg(0.23), Ncor2(0.23), Ncoa2(0.22), Ppard(0.16), Hmga1-rs1(0.15), Ncor1(0.14), Ncor1(0.14), Ncoa1(0.13), Uimc1(0.07), Sumo2(0.07), Nr1h2(-0.01), Nr1h2(-0.01), Med25(-0.04), Med25(-0.04), Hmga1(-0.07), Nr1h4(-0.14), Vdr(-0.16), Nr1h3(-0.27),
cellular response to BMP stimulus	0.0224189	0.282469	0.00010753	0.000500582	23	0.67101	0.0190721	0.0232506	0.00794079	0.012486	Nog(0.96), Gata5(0.71), Gata6(0.43), Bmp2(0.34), Bmpr2(0.32), Adamts7(0.3), Runx2(0.29), Heyl(0.29), Kcnd3(0.27), Smad1(0.26), Bmpr1b(0.18), Gata3(0.18), Adamts12(0.18), Acvr1(0.14), Acvrl1(0.11), Acvr2a(0.1), Bmp7(0.07), Bmp4(0.01), Bmpr1a(0.01), Smad5(-0.08), Scx(-0.14), Bmp6(-0.24), Tmem100(-0.37),
cell cycle arrest	0.0329915	0.154497	0.000109217	0.000507765	67	0.184647	0.177657	0.0159149	0.0310493	0.00751246	Inhba(1.17), Thbs1(0.72), Slfn1(0.59), Vash1(0.57), Gadd45a(0.55), Smad3(0.4), Cdkn2b(0.39), Kmt2e(0.38), Pmp22(0.37), Apc(0.35), Trp53inp1(0.35), Apbb2(0.34), Skil(0.33), Pml(0.32), Rassf1(0.32), Pkd2(0.3), Notch2(0.28), Tgfb1(0.28), Ddit3(0.27), Cdkn2d(0.26), Pkd1(0.25), Zak(0.24), Tcf7l2(0.23), Tgfb2(0.23), Ern1(0.18), Irf1(0.17), Eif2ak4(0.17), Cdkn1a(0.15), Cdkn1a(0.15), Cdkn1a(0.15), Uhmk1(…
histone H3-K4 demethylation	0.0419465	0.374283	0.000110841	0.000514639	11	0.0205206	0.0450216	0.193291	0.0246412	0.0457637	Kdm5b(0.29), Kdm5b(0.29), Kdm5a(0.18), Kdm1a(0.17), Kdm1a(0.17), Kdm1a(0.17), Kdm5c(0.15), Kdm5c(0.15), Kdm5d(-0.01), 2410016O06Rik(-0.17), Kdm1b(-0.22),
embryo implantation	0.0346499	0.225034	0.000112426	0.000521316	32	0.125508	0.0206194	0.0482816	0.100813	0.0169235	Lif(1.22), Lif(1.22), Ptgs2(1.16), Ptgs2(1.16), Acod1(1.12), Mmp9(0.59), Tead4(0.5), Cdh1(0.38), Emp2(0.38), Emp2(0.38), Lamb1(0.38), Ggn(0.38), Stx2(0.17), Pcsk5(0.17), Ppard(0.16), Ppard(0.16), Reck(0.16), H3f3b(0.15), Klf9(0.1), Rxra(0.07), Vmp1(0.04), Ube2q1(-0.03), Ptgis(-0.07), Sod1(-0.1), Mmp2(-0.11), Ddr1(-0.13), Trim28(-0.13), H2-Q7(-0.25), Fkbp4(-0.29), Grn(-0.4), Polr1b(-0.59), Pzp(-0.…
T cell activation	0.0361198	0.245753	0.00011319	0.000524169	27	0.227242	0.0458378	0.0219627	0.0382289	0.0214483	Il6(1.24), Treml2(0.82), Itgav(0.53), Smad3(0.4), Icosl(0.4), Cd276(0.34), Cblb(0.32), Tgfb1(0.28), Tgfb1(0.28), Ada(0.24), Was(0.22), Dock2(0.17), Ifnar1(0.14), Satb1(0.14), Nlrc3(0.13), Vav1(0.07), Dlg1(0.06), Azi2(0.03), Azi2(0.03), Dpp4(0), Nck1(-0.05), Hspd1(-0.14), Hspd1(-0.14), Hspd1(-0.14), Nedd4(-0.14), Ddost(-0.2), Cd48(-0.34),
extrinsic apoptotic signaling pathway via death domain receptors	0.0414314	0.200168	0.000113618	0.000525466	38	0.118476	0.0272573	0.0279028	0.0282419	0.0936894	Ngf(0.54), Bag3(0.35), Rock2(0.34), Tnfrsf26(0.34), Casp8ap2(0.32), Casp8ap2(0.32), Nradd(0.3), Dab2ip(0.3), Nf1(0.29), Ddx3x(0.26), Bcl2(0.24), Fas(0.19), Fas(0.19), Fas(0.19), Pik3r1(0.19), Pik3r1(0.19), Dedd2(0.13), Dedd2(0.13), Tnfrsf18(0.11), Tnfrsf9(0.11), Dedd(0.1), Sort1(0.09), Bex3(0.07), Dapk1(0.05), Dapk1(0.05), Il18(0.04), Tnfrsf1a(-0.02), 0610009O20Rik(-0.06), Ddx47(-0.08), Casp8(-0.…
neural crest cell development	0.0334074	0.341905	0.000113826	0.000525737	14	0.320643	0.0204161	0.0246106	0.0217221	0.0404647	Sox11(0.57), Edn1(0.53), Tfap2a(0.49), Ednra(0.48), Rdh10(0.37), Foxc1(0.32), Snai2(0.27), Aldh1a2(0.14), Aldh1a2(0.14), Sox9(0.04), Foxc2(0.02), Bmpr1a(0.01), Mapk1(-0.01), Mapk3(-0.08),
posttranscriptional regulation of gene expression	0.0334821	0.267123	0.000114445	0.000527908	22	0.0144867	0.0353618	0.169434	0.0359847	0.0677664	Per1(0.45), Gcnt2(0.38), Gcnt2(0.38), Nanos1(0.37), Nanos1(0.37), Rc3h2(0.35), Rc3h1(0.33), Rc3h1(0.33), Atg14(0.21), Cav1(0.16), Pum2(0.12), Pum2(0.12), Pum1(0.07), Pum1(0.07), Tdrd7(0.06), Epb41l5(0.04), Nacc2(-0.02), Fbxo4(-0.03), Matr3(-0.04), Ace(-0.21), Cdc37(-0.24), Npm1(-0.47),
CCR4-NOT complex	0.0399467	0.297495	0.000114788	0.000528804	18	0.0741566	0.0925962	0.0755428	0.0100556	0.0438822	Tnks1bp1(0.26), Cpeb3(0.2), Cnot4(0.17), Cnot4(0.17), Patl1(0.15), Cnot6(0.14), Cnot1(0.09), Cnot3(0.06), Cnot11(0.04), Tob1(0.01), Cnot6l(0.01), Cnot8(0), Cnot8(0), Cnot2(0), Cnot7(-0.02), Cnot7(-0.02), Cnot9(-0.09), Cnot10(-0.16),
negative regulation of vascular permeability	0.0254882	0.360244	0.000115511	0.000531441	13	0.216106	0.0996791	0.00973258	0.00204243	0.169199	Ptprj(0.43), Pde3a(0.43), Ceacam1(0.41), Slit2(0.31), Angpt1(0.25), Angpt1(0.25), Pde2a(0.2), Adora2a(0.19), Nr3c1(0.19), Arhgap35(0.06), Ramp2(-0.04), Ramp2(-0.04), Adm(-0.15),
mitogen-activated protein kinase kinase binding	0.0396108	0.269568	0.000116097	0.000533445	21	0.0126998	0.0254777	0.0305709	0.239072	0.0718171	Trib1(0.51), Trib1(0.51), Mapk8ip3(0.3), Mapk8ip3(0.3), Dab2ip(0.3), Braf(0.25), Taok2(0.25), Trib2(0.21), Map3k1(0.2), Arrb1(0.17), Ksr1(0.15), Raf1(0.07), Dlg1(0.06), Map3k11(0), Mapk8ip1(-0.01), Igbp1(-0.08), Ksr2(-0.14), Pin1(-0.15), Dusp19(-0.17), Trib3(-0.18), Ace(-0.21),
negative regulation of phosphorylation	0.0461131	0.281606	0.000117717	0.000540185	19	0.0390007	0.0525021	0.0518084	0.0456101	0.0638357	Atxn1(0.53), Sirt1(0.4), Sirt1(0.4), Cdkn2b(0.39), Birc3(0.35), Cdkn2d(0.26), Atxn7(0.25), Cdkn1a(0.15), Cdkn1b(0.14), Cdkn1c(0.09), Bmp7(0.07), Ankle2(0.05), Ankle2(0.05), Prkrip1(0.03), Bmp4(0.01), Grb10(-0.03), Stap1(-0.05), Cdkn2c(-0.06), Dynll1(-0.12),
negative regulation of NF-kappaB import into nucleus	0.0378109	0.390391	0.000117975	0.000540666	10	0.0155124	0.0852938	0.0436137	0.0929438	0.0482559	Nlrp3(0.48), Zc3h12a(0.46), C1qtnf3(0.35), Nov(0.34), Uaca(0.31), Fbxw11(0.17), Litaf(0.16), Cyld(0.15), Ppm1b(0.12), Ppm1a(-0.05),
positive regulation of NIK/NF-kappaB signaling	0.0340451	0.293592	0.000118656	0.000543087	19	0.373747	0.0232534	0.0867815	0.0180084	0.00717167	Havcr2(0.71), Crebbp(0.4), Nod2(0.4), Nod2(0.4), Rc3h2(0.35), Rc3h1(0.33), Smpd3(0.26), Glrx(0.26), Ago3(0.24), Actn4(0.16), Tlr2(0.14), Sash1(0.11), Nod1(0.08), Eif2ak2(0.02), Hmgb1(-0.05), Ago1(-0.06), Calr(-0.1), Tnf(-0.19), Rps3(-0.32),
prostate gland epithelium morphogenesis	0.0362917	0.375625	0.000120185	0.000549373	11	0.0414875	0.0379398	0.00939816	0.0526041	0.231754	Tnc(0.86), Notch1(0.64), Id4(0.51), Igf1r(0.33), Rarg(0.27), Igf1(0.12), Stat5a(0.1), Cyp7b1(0.02), Mmp2(-0.11), Ar(-0.12), Foxa1(-0.12),
peptide cross-linking	0.0185723	0.381216	0.000121457	0.000554471	14	0.382037	0.164115	0.0413822	0.00879587	0.00241073	Thbs1(0.72), Sprr2f(0.56), F13a1(0.52), Dsp(0.5), Fn1(0.4), Evpl(0.38), Anxa1(0.33), Col3a1(0.27), Abca7(0.2), Sprr1a(0.19), Sprr1a(0.19), Tgm2(-0.05), Tgm1(-0.48), Epb42(-0.67),
arachidonic acid epoxygenase activity	0.0169496	0.31815	0.000122417	0.000558134	21	0.000422742	0.00342187	0.119034	0.559147	0.129623	Cyp2b10(0.74), Cyp2d12(0.63), Cyp4f18(0.47), Cyp2d9(0.35), Cyp4a32(0.34), Cyp2d26(0.24), Cyp2c44(0.18), Cyp2c44(0.18), Cyp2j13(0.14), Cyp2j9(0.12), Cyp2e1(0.11), Cyp2j11(0.11), Cyp2j6(0.09), Cyp2j6(0.09), Cyp2f2(0.08), Cyp2d22(0.06), Cyp2j5(-0.01), Cyp2a4(-0.11), Cyp2a5(-0.3), Cyp4a31(-0.49), Cyp4a10(-0.54),
positive regulation of DNA biosynthetic process	0.0404315	0.298317	0.000123497	0.000562332	17	0.0682201	0.00894572	0.0651648	0.0499327	0.118873	Pak3(0.97), Egf(0.56), Hgf(0.46), Pdgfb(0.45), Prkd2(0.29), Src(0.26), Cyp1b1(0.24), Gsk3b(0.22), Pdgfrb(0.19), Arrb2(0.19), Fgfr4(0.16), Nox4(0.16), Ptk2b(0.12), Ddx39b(-0.11), Gfer(-0.3), C3ar1(-0.43), Myc(-1.62),
1-phosphatidylinositol-3-kinase activity	0.0324045	0.310886	0.000124461	0.000565995	16	0.162572	0.0345806	0.109182	0.0108413	0.031199	Pik3c2g(0.52), Pik3ca(0.28), Pik3ca(0.28), Pik3cd(0.24), Pik3cg(0.22), Pik3cg(0.22), Pik3r1(0.19), Pik3r1(0.19), Pik3cb(0.18), Pik3cb(0.18), Pik3c2b(0.09), Pik3c2a(0.05), Pik3c3(-0.1), Pik3c3(-0.1), Atm(-0.13), Pik3r2(-0.13),
platelet formation	0.0348507	0.299623	0.000125664	0.000570733	17	0.114475	0.0320402	0.0786337	0.119382	0.00555959	Clec1b(0.6), Nbeal2(0.41), Myh9(0.39), Tal1(0.35), Ep300(0.33), Ep300(0.33), Mef2c(0.26), Actn1(0.24), Ptpn11(0.16), Srf(0.16), Wdr1(0.16), Zfpm1(0.12), Ptpn6(-0.06), Vps33a(-0.14), Mfap2(-0.18), Zfp385a(-0.21), Cib1(-0.27),
negative regulation of Rho protein signal transduction	0.0408798	0.298136	0.000126687	0.000574641	17	0.0958974	0.0626698	0.0563277	0.0350227	0.0258656	Dlc1(0.46), Arap3(0.35), Abl2(0.3), Itga3(0.3), Bcl6(0.25), Kank1(0.25), Scai(0.24), Flcn(0.22), Adra1b(0.18), Cul3(0.14), Itgb1(0.11), Adra1a(0.06), Arhgap35(0.06), Arhgap35(0.06), Tnfaip1(-0.05), Kctd13(-0.17), Arhgap42(-0.18),
N-acetylglucosamine 6-O-sulfotransferase activity	0.0375012	0.256477	0.000131569	0.000596019	23	0.0584079	0.0105529	0.0468072	0.0698566	0.128854	Hs3st3b1(0.6), Hs3st1(0.49), Chst1(0.48), Chst2(0.43), Chst2(0.43), Sult5a1(0.4), Ust(0.3), Hs3st3a1(0.28), Ndst2(0.26), Chst8(0.26), Ndst1(0.18), Sult1e1(0.13), Chst3(0.13), Sult1a1(0.08), Hs6st1(0.07), Sult1b1(-0.01), Sult1c2(-0.04), Hs2st1(-0.09), Hs6st2(-0.13), Chst7(-0.18), Chst7(-0.18), Sult1d1(-0.2), Hs3st6(-0.2),
high voltage-gated calcium channel activity	0.0102755	0.454682	0.000133139	0.000602361	13	0.699568	0.272751	0.000796459	0.00187313	0.0219243	Cacna1c(0.5), Cacna1c(0.5), Cacnb1(0.26), Cacnb3(0.19), Cacnb3(0.19), Cacna1d(0.09), Cacna1d(0.09), Cacnb4(0.08), Cacnb2(0.07), Cacnb2(0.07), Cacna1a(0.03), Cacna1a(0.03), Cacna1a(0.03),
lysine-acetylated histone binding	0.0400051	0.317168	0.000133359	0.000602586	15	0.0297262	0.0725087	0.0619011	0.0472493	0.0549562	Kmt2a(0.53), Phip(0.31), Brd2(0.28), Taf1(0.22), Baz2a(0.21), Atad2b(0.21), Baz1b(0.15), Brd3(0.15), Brd9(0.09), Trim24(0.08), Brdt(0.07), Psme4(0.06), Smarca4(-0.04), Brd7(-0.11), Carm1(-0.23),
cellular response to platelet-derived growth factor stimulus	0.0437712	0.327289	0.000134809	0.00060836	14	0.16497	0.0694495	0.0596926	0.0184234	0.0203417	Has2(1.55), Has1(0.96), Itgb3(0.67), Fyn(0.37), Snai2(0.27), Src(0.26), Iqgap1(0.22), Atp7a(0.17), Hyal1(0.12), Rasa1(0.12), Prkce(0.03), Arpc2(0.01), Yes1(-0.03), Coro1b(-0.22),
positive regulation of JNK cascade	0.0296391	0.164887	0.000135029	0.000608576	64	0.0908422	0.16825	0.0869346	0.0157244	0.00972352	Il1b(0.69), Il1b(0.69), Il1b(0.69), Gadd45b(0.65), Gadd45a(0.55), Tlr4(0.55), Tlr4(0.55), Rassf2(0.47), Hipk2(0.42), Ceacam1(0.41), Nod2(0.4), Nod2(0.4), Flt4(0.38), Ctgf(0.35), Map3k5(0.35), Taok1(0.35), Gadd45g(0.32), Dab2ip(0.3), Plcb1(0.27), Taok2(0.25), Lmnb1(0.24), Dixdc1(0.24), F2rl1(0.23), Tirap(0.21), Rb1cc1(0.2), Map4k2(0.2), Rasgrp1(0.18), Ptk2b(0.12), Tpd52l1(0.09), Ripk1(0.08), Ripk1…
positive regulation of CREB transcription factor activity	0.0292059	0.377352	0.000135406	0.000609498	12	0.538782	0.0369407	0.0247446	0.0127007	0.0121114	Reln(0.45), Reln(0.45), Crebbp(0.4), Camk1d(0.31), Vegfa(0.29), Prkd2(0.29), Crtc3(0.28), Prkd1(0.18), Crtc2(0.15), Cacna1d(0.09), Lrp8(0), Crtc1(-0.11),
protein localization to cell surface	0.0387502	0.268181	0.000136469	0.000613503	21	0.0806915	0.144789	0.0421053	0.0205734	0.0280431	Mrap(0.73), Slc28a2(0.71), Wnt11(0.6), Flna(0.42), Ric3(0.42), Emp2(0.38), Smurf1(0.27), Ptpru(0.26), Vcl(0.26), Angpt1(0.25), Fgf7(0.24), Gpihbp1(0.21), Fbln5(0.18), Usp4(0.1), Ptprk(0.05), Arf6(0.03), Ctnnb1(0.03), Ank2(-0.05), Wash1(-0.1), Pigk(-0.14), Mesdc2(-0.32),
semaphorin-plexin signaling pathway involved in axon guidance	0.0253425	0.393963	0.000136796	0.000614193	11	0.493903	0.0512674	0.00943071	0.0291722	0.0122898	Plxna2(0.69), Plxna4(0.54), Plxnc1(0.45), Sema3a(0.42), Sema3f(0.39), Plxnb1(0.39), Plxnd1(0.32), Plxna1(0.26), Plxnb2(-0.02), Plxna3(-0.18), Nrp1(-0.19),
neuron remodeling	0.0311678	0.395312	0.00013719	0.000615183	10	0.143232	0.0231668	0.0410074	0.144516	0.0113631	Rnd1(0.62), Pdgfb(0.45), Abl2(0.3), Scarf1(0.27), Cspg4(0.19), Gnaq(0.12), Ntn4(0.09), App(0.06), Anks1(0.06), Farp2(-0.11),
positive regulation of cytokine secretion	0.029469	0.263046	0.000139049	0.000622729	28	0.320496	0.15003	0.0436922	0.0061072	0.0079763	Clec4e(1.14), Tnfsf15(0.72), Syk(0.63), Ptger4(0.55), Clec5a(0.39), Fgr(0.36), C1qtnf3(0.35), C1qtnf3(0.35), P2rx7(0.32), Cd14(0.3), Rgcc(0.27), Src(0.26), Clec9a(0.19), Agtr1a(0.17), Tlr2(0.14), Clec4n(0.11), Casp1(-0.02), Casp1(-0.02), Cadm1(-0.05), Irf3(-0.1), Cd300c2(-0.12), Tnf(-0.19), Scamp5(-0.21), Mif(-0.24), Panx1(-0.27), Cd36(-0.41), Glmn(-0.48), Agt(-0.75),
retinoic acid metabolic process	0.0208643	0.36105	0.000139236	0.000622776	17	0.00187568	0.0085531	0.116138	0.244075	0.169395	Aldh1a3(0.73), Aldh1a3(0.73), Aldh1a3(0.73), Bco2(0.61), Adh1(0.19), Adh1(0.19), Cyp26b1(0.16), Aldh1a2(0.14), Aldh1a2(0.14), Aldh1a2(0.14), Rbp1(-0.02), Rbp1(-0.02), Aldh8a1(-0.05), Aldh1a1(-0.22), Aldh1a1(-0.22), Aldh1a1(-0.22), Adh7(-0.59),
negative regulation of bone mineralization	0.0375021	0.383544	0.000139489	0.000623121	11	0.11336	0.0425371	0.037124	0.0371198	0.0520815	Nfe2(0.82), Ccr1(0.6), Srgn(0.55), Hif1a(0.34), Bcor(0.28), Ecm1(0.21), Ptk2b(0.12), Trpm4(0.11), Ltbp3(0.05), Sox9(0.04), Grem1(-0.47),
movement of cell or subcellular component	0.035539	0.2808	0.00014093	0.000628766	21	0.0468798	0.245593	0.0592584	0.0310644	0.00991911	Macf1(0.44), Alox12(0.42), Myh9(0.39), Pdpn(0.32), Pxn(0.29), Wasf2(0.23), Mylip(0.16), Cd9(0.13), Abi2(0.11), Elmo1(0.08), Elmo1(0.08), Enah(0.07), Strbp(0.04), Abi1(0.03), Pafah1b2(0), Dstn(0), Sh2b1(-0.03), Cfl1(-0.06), Ptk2(-0.06), Sirpa(-0.16), Lypd3(-0.16),
activation of phospholipase C activity	0.0299834	0.385198	0.000141406	0.000630095	11	0.306638	0.043305	0.0263469	0.00126359	0.173169	Sele(0.85), Itk(0.68), Ang(0.64), Dlc1(0.46), Adcyap1r1(0.35), Lpar1(0.14), Lpar1(0.14), Gnaq(0.12), Adra1a(0.06), Txk(-0.28), Agt(-0.75),
male gonad development	0.0345809	0.158099	0.000146299	0.000651076	64	0.294738	0.0795094	0.0670014	0.00508332	0.0186745	Inhba(1.17), Jmjd1c(0.68), Insl3(0.57), Insl3(0.57), Arid5b(0.54), Kdr(0.51), Bcl2l11(0.46), Hmga2(0.4), Sfrp2(0.4), Nupr1(0.4), Tgfbr1(0.39), Esr1(0.37), Insr(0.32), Ago4(0.31), Ercc1(0.29), Ren1(0.28), Cited2(0.27), Wt1(0.25), Wt1(0.25), Bcl2(0.24), Aspm(0.23), Six4(0.22), Gata3(0.18), Rhobtb3(0.16), H3f3b(0.15), Rara(0.14), Fgf9(0.12), Acvr2a(0.1), Brip1(0.1), Nkx3-1(0.09), Tmf1(0.08), Bcl2l1(…
thymus development	0.0415533	0.185821	0.000151488	0.000673324	44	0.121873	0.0828887	0.0451039	0.0458044	0.015957	Ephb3(0.69), Bcl2l11(0.46), Tgfbr1(0.39), Apc(0.35), Ripk3(0.28), Cited2(0.27), Cited2(0.27), Braf(0.25), Bcl2(0.24), Bcl2(0.24), Six4(0.22), Crkl(0.21), Abl1(0.19), Gata3(0.18), Jarid2(0.16), Srf(0.16), Bcl11b(0.15), Ikzf1(0.14), Carmil2(0.13), Hes1(0.12), Map2k1(0.09), Cacnb4(0.08), Raf1(0.07), Nfatc3(0.06), Hoxa3(0.05), Hoxa3(0.05), Lmo4(0.05), Pbx1(0.05), Ctnnb1(0.03), Zbtb1(0.03), Mafb(0.02)…
positive regulation of insulin secretion	0.0455908	0.202937	0.000157938	0.000700298	36	0.0435525	0.0312009	0.0371337	0.105447	0.0744027	Nnat(0.97), Gja1(0.63), Sox4(0.54), Cd38(0.52), Myrip(0.5), Irs2(0.49), Mgea5(0.41), Trpm2(0.39), Glul(0.37), Gpr39(0.34), Jak2(0.31), Glrx(0.26), Tcf7l2(0.23), Tcf7l2(0.23), Aacs(0.19), Abat(0.17), Ppard(0.16), Pfkfb2(0.15), Sirt3(0.12), Prkce(0.03), Gper1(0.03), Ptbp1(0), Gpr68(0), Mcu(-0.02), Nlgn2(-0.03), Casr(-0.06), Psmd9(-0.1), Psmd9(-0.1), Capn10(-0.11), Pfkm(-0.12), Bad(-0.16), Serp1(-0.…
response to estradiol	0.0469675	0.271865	0.000157953	0.000700298	20	0.0861287	0.0378061	0.0715951	0.0434113	0.0412865	Fosl2(0.6), Sprr2f(0.56), Nos3(0.51), Mapk15(0.4), Areg(0.37), Esr1(0.37), Socs2(0.36), Ptgfr(0.29), Prdm2(0.29), Tgfb1(0.28), Stat3(0.21), Ncoa1(0.13), Stat5b(0.07), Ctnnb1(0.03), Strn3(0.03), Prkca(-0.09), Foxa1(-0.12), Hsf1(-0.2), Grn(-0.4), Ogg1(-0.59),
regulation of calcium ion transport	0.0264759	0.24822	0.000159926	0.000708159	28	0.366226	0.0856635	0.00308111	0.0143352	0.0792648	Cxcr4(0.86), P2ry12(0.74), Gja1(0.63), Cckar(0.56), Cacna2d1(0.55), Cacna2d1(0.55), Adrb2(0.47), Best1(0.31), Bcl2(0.24), Cacna1g(0.22), Adora2a(0.19), Stim1(0.19), P2rx1(0.15), Cxcl12(0.13), Igf1(0.12), Cacna1d(0.09), Sri(0.05), Adrb1(0.04), Slc8a1(0.01), Rhoa(-0.05), Ank2(-0.05), Casr(-0.06), Orai1(-0.06), Gnai2(-0.09), Vdr(-0.16), Cav3(-0.19), Grin3b(-0.37), Agt(-0.75),
cardiac muscle tissue morphogenesis	0.0305274	0.403462	0.000166734	0.00073738	10	0.548559	0.035096	0.00621321	0.0227815	0.0332737	Notch1(0.64), Ttn(0.57), Ttn(0.57), Ankrd1(0.4), Bmp2(0.34), Angpt1(0.25), Epor(0.16), Zfpm1(0.12), Zfpm2(0.12), Egln1(-0.11),
negative regulation of epidermal growth factor-activated receptor activity	0.0506828	0.349113	0.000168651	0.000744927	12	0.0199034	0.040063	0.116637	0.0543077	0.0787108	Gprc5a(0.51), Cbl(0.48), Socs5(0.44), Errfi1(0.39), Errfi1(0.39), Cblb(0.32), Socs4(0.16), Zgpat(0.03), Psen1(-0.02), Cblc(-0.08), Cblc(-0.08), Psen2(-0.15),
retina vasculature morphogenesis in camera-type eye	0.0340872	0.416047	0.000168899	0.000745095	10	0.309875	0.0365032	0.0121008	0.0382333	0.0445106	Rhoj(0.38), Arhgef15(0.37), Fzd4(0.29), Fzd4(0.29), Fzd4(0.29), Clic4(0.25), Lrp5(0.05), Lrp5(0.05), Slc4a7(0.01), Nrp1(-0.19),
steroid hormone receptor activity	0.0353902	0.179116	0.00016966	0.000747519	47	0.0393589	0.0183359	0.0418061	0.148613	0.0819069	Nr4a3(0.99), Nr5a2(0.93), Nr4a2(0.91), Nr1d1(0.89), Pgr(0.66), Pgr(0.66), Nr4a1(0.58), Rorb(0.49), Nr1d2(0.44), Paqr8(0.39), Esr1(0.37), Rarb(0.34), Rora(0.33), Rarg(0.27), Pparg(0.23), Nr3c1(0.19), Nr3c2(0.19), Ppard(0.16), Rara(0.14), Nr2f1(0.12), Nr2c2(0.12), Rxra(0.07), Paqr5(0.07), Nr2f2(0.06), Esrrg(0.05), Gper1(0.03), Abhd2(0.02), Nr6a1(-0.01), Nr1h2(-0.01), Esrra(-0.06), Hnf4a(-0.1), Nr1i…
delayed rectifier potassium channel activity	0.030529	0.320331	0.000171712	0.000755619	21	0.0806558	0.116341	0.00734785	0.0577014	0.081192	Kcnc2(0.86), Kcnc2(0.86), Kcna5(0.4), Kcna5(0.4), Kcng2(0.38), Kcnh2(0.35), Kcns3(0.3), Kcnq1(0.14), Kcnq1(0.14), Kcnb1(0.06), Kcnb1(0.06), Kcnb1(0.06), Kcnf1(0.04), Kcnq4(-0.16), Kcnc3(-0.18), Kcne1(-0.21), Kcnh1(-0.26), Kcnh1(-0.26), Kcna1(-0.75), Kcna1(-0.75), Kcna7(-1.02),
proteoglycan sulfotransferase activity	0.0410266	0.259299	0.00017299	0.000760296	22	0.0348008	0.0104691	0.0503999	0.0841806	0.195168	Hs3st3b1(0.6), Hs3st1(0.49), Chst1(0.48), Chst2(0.43), Sult5a1(0.4), Ust(0.3), Hs3st3a1(0.28), Ndst2(0.26), Chst8(0.26), Ndst1(0.18), Sult1e1(0.13), Chst3(0.13), Chst3(0.13), Sult1a1(0.08), Hs6st1(0.07), Sult1b1(-0.01), Sult1c2(-0.04), Hs2st1(-0.09), Hs6st2(-0.13), Chst7(-0.18), Sult1d1(-0.2), Hs3st6(-0.2),
axolemma	0.0359486	0.31547	0.000177149	0.00077761	15	0.199473	0.0947427	0.0101221	0.0712626	0.0205099	Kcnc2(0.86), Ank1(0.73), Adora1(0.32), Mapk8ip3(0.3), Robo1(0.28), Epb41l3(0.2), Adora2a(0.19), Sptbn1(0.18), Robo2(0.17), Myo1d(0.17), Gabbr1(0.14), Slc1a2(-0.01), Kcnc3(-0.18), Kcnh1(-0.26), Nrg1(-0.26),
phospholipid binding	0.0424178	0.146512	0.000177898	0.000779464	69	0.107192	0.0775235	0.0299295	0.0388568	0.0469435	Nr5a2(0.93), Apob(0.76), Sgip1(0.75), F10(0.62), Map1b(0.51), Dysf(0.45), Ptafr(0.42), Nbeal2(0.41), F3(0.38), Arhgap26(0.37), Anxa1(0.33), Tiam1(0.31), Hip1(0.31), Plcd1(0.3), Wdfy3(0.25), Ophn1(0.25), Picalm(0.24), Nbeal1(0.22), Pitpnm1(0.19), Sptbn1(0.18), Pla2g7(0.18), Bin2(0.17), Lpar1(0.14), Arhgap44(0.14), Dgka(0.13), Hip1r(0.13), Carmil2(0.13), Lpar3(0.12), Apoe(0.11), Apoe(0.11), Myo1c(0…
carbohydrate binding	0.0226103	0.124095	0.000178012	0.000779464	125	0.355948	0.103205	0.0177412	0.00552783	0.0438385	Clec4d(1.16), Clec4e(1.14), Clec2h(1.09), Cd33(1.06), Fcer2a(0.87), Sele(0.85), Nptx2(0.8), Sell(0.76), Clec10a(0.75), Selp(0.72), Cd93(0.66), Clec1b(0.6), Chil3(0.59), Pla2r1(0.56), Galnt11(0.56), Mgl2(0.52), Crybg3(0.52), Mrc1(0.51), Galnt15(0.51), Galnt16(0.48), Gfpt2(0.47), Olr1(0.47), Eva1c(0.45), Fbxo2(0.43), Vcan(0.4), Clec5a(0.39), Galnt6(0.38), Klrb1b(0.36), Pkd1l3(0.36), Pygl(0.35), Cd2…
defense response to protozoan	0.0275849	0.290781	0.000184139	0.000805043	20	0.0288217	0.165699	0.13685	0.00483971	0.0788078	Il6(1.24), Iigp1(0.76), Lyst(0.44), Batf(0.44), Il4ra(0.43), Slc11a1(0.31), Cd40(0.26), Gbp2(0.19), Cd37(0.14), Nras(0.13), Bcl3(0.04), Ccdc88b(0.01), Irf8(0), Gbp3(-0.14), Hras(-0.17), Gbp7(-0.17), Gbp7(-0.17), Batf2(-0.23), Tlr12(-0.24), Gbp9(-0.3),
neuron projection extension	0.0352823	0.257573	0.000184309	0.000805043	23	0.0419019	0.384793	0.0204413	0.024955	0.0264	Flrt3(0.45), Sema5b(0.39), Sema5b(0.39), Tiam1(0.31), Ndel1(0.29), Plxna1(0.26), Usp9x(0.22), Iqgap1(0.22), Flrt1(0.18), Eif2ak4(0.17), Kdm1a(0.17), Kdm1a(0.17), Jade2(0.16), Impact(0.07), Sema5a(0.03), Sema5a(0.03), Prkcz(0), Bdnf(-0.01), Ddr1(-0.13), Postn(-0.16), Plxna3(-0.18), Aurka(-0.18), Emx1(-0.35),
brush border membrane	0.00766534	0.193058	0.000188835	0.000823148	71	2.79187e-05	0.0024808	0.155493	0.692251	0.274412	Slc6a14(1.09), Trpm6(0.83), Slc26a4(0.78), Slc9a3(0.73), Slc9a3(0.73), Cybrd1(0.71), Ceacam1(0.41), Slc34a3(0.36), Atp8b1(0.32), Pdzk1(0.27), Hsp90aa1(0.24), Slc6a20b(0.24), Slc6a19(0.24), Slc5a2(0.24), Slc34a1(0.23), Lrp2(0.21), Lrp2(0.21), Rapgef3(0.21), Gna13(0.2), Gna13(0.2), B4galt1(0.18), Pik3cb(0.18), Atp7a(0.17), Ptger3(0.17), Mttp(0.15), Pld2(0.15), Cubn(0.13), Slc22a5(0.11), Slc22a5(0.1…
embryonic limb morphogenesis	0.0244045	0.196633	0.000189075	0.000823148	47	0.670337	0.0244663	0.00222818	0.0315132	0.0429253	Notch1(0.64), Twist1(0.57), Gli3(0.43), Gli3(0.43), Lmx1b(0.4), Lrp6(0.38), Fgfr1(0.36), Gja5(0.34), Zbtb16(0.32), Notch2(0.28), Trp63(0.27), Trp63(0.27), Ski(0.24), Chst11(0.22), Dync2h1(0.22), Dicer1(0.16), Cyp26b1(0.16), Ptch1(0.15), Ptch1(0.15), Aldh1a2(0.14), Fgf9(0.12), Megf8(0.1), C2cd3(0.1), Hoxd11(0.09), Bmp7(0.07), Bmp7(0.07), Hoxd10(0.07), Wnt7a(0.07), Pbx1(0.05), Bmp4(0.01), Bmp4(0.01…
NuRD complex	0.0475029	0.232106	0.000189152	0.000823148	28	0.0394421	0.0431069	0.132446	0.0583513	0.0365558	Chd5(1.05), Chd3(0.23), Chd3(0.23), Chd4(0.21), Chd4(0.21), Gatad2b(0.21), Appl2(0.12), Mta3(0.1), Hdac1(0.09), Hdac1(0.09), Hdac1(0.09), Mta2(0.07), Mta2(0.07), Mta2(0.07), Appl1(0.06), Rbbp4(-0.02), Rbbp4(-0.02), Sall2(-0.02), Nacc2(-0.02), Sall1(-0.04), Mta1(-0.06), Gatad2a(-0.08), Gatad2a(-0.08), Hdac2(-0.09), Csnk2a1(-0.13), Rbbp7(-0.17), Rbbp7(-0.17), Mbd3(-0.21),
sodium ion transport	0.0385852	0.136239	0.000192386	0.000836194	92	0.0548927	0.0131128	0.0121546	0.148401	0.205764	Slc9a3(0.73), Slc9a3(0.73), Slc5a12(0.62), Slc17a4(0.62), Slc38a4(0.54), Slc10a6(0.49), Slc38a2(0.48), Slc24a3(0.43), Trpm2(0.39), Slc9a7(0.37), Slc5a3(0.36), Slc34a3(0.36), Slc17a8(0.36), Atp1a2(0.35), Slc23a2(0.34), Slc4a8(0.32), Slc38a1(0.31), Slc9a9(0.3), Scnn1a(0.27), Scnn1a(0.27), Scnn1a(0.27), Slc9a4(0.26), Slc5a8(0.26), Slc12a3(0.24), Slc12a3(0.24), Slc13a2(0.24), Slc5a2(0.24), Slc34a1(0.…
transcription cofactor activity	0.0453896	0.164684	0.000194154	0.000842844	54	0.0894132	0.0698959	0.0817231	0.0446082	0.0217284	Nfkbid(0.67), Med13(0.53), Nfkbiz(0.44), Ptpn14(0.42), Crebbp(0.4), Nrip1(0.39), Meis2(0.37), Ep300(0.33), Cited2(0.27), Ddx5(0.26), Nsd1(0.24), Nsd1(0.24), Rad54l2(0.24), Med12(0.23), Lpxn(0.23), Lpxn(0.23), Zfp865(0.23), Trrap(0.21), Phf21b(0.21), Zfp212(0.17), Hes6(0.16), Kat2b(0.12), Med14(0.1), Supt20(0.09), Phf21a(0.09), Zmynd8(0.08), Thrap3(0.08), Phf12(0.08), Cbfb(0.07), Zfp667(0.07), Med…
protein dimerization activity	0.0375521	0.108457	0.00019451	0.000843353	131	0.225536	0.031094	0.0085744	0.073221	0.0697067	Mxd1(0.76), Bhlhe41(0.74), Mycn(0.63), Twist1(0.57), Id4(0.51), Tfap2a(0.49), Epas1(0.48), Ano1(0.46), Mxd3(0.44), Ano3(0.44), Hey1(0.43), Bhlhe40(0.43), Sim1(0.41), Ceacam1(0.41), Zbed6(0.4), Id3(0.39), Lyl1(0.38), Tcf23(0.38), Ggn(0.38), Hey2(0.35), Tal1(0.35), Tcf4(0.35), Hif1a(0.34), Bhlhe22(0.34), Id1(0.32), Heyl(0.29), Ahr(0.28), Celsr1(0.26), Mef2a(0.26), Mef2c(0.26), Mlxip(0.26), Ncoa3(0.…
steroid hormone mediated signaling pathway	0.0319846	0.189194	0.000195046	0.000844643	44	0.0362261	0.0107305	0.0643942	0.228721	0.0578994	Nr4a3(0.99), Nr5a2(0.93), Nr4a2(0.91), Nr1d1(0.89), Pgr(0.66), Nr4a1(0.58), Rorb(0.49), Nr1d2(0.44), Esr1(0.37), Rarb(0.34), Rora(0.33), Rarg(0.27), Pparg(0.23), Nr3c1(0.19), Nr3c2(0.19), Ppard(0.16), Rara(0.14), Nr2f1(0.12), Nr2c2(0.12), Bmp7(0.07), Rxra(0.07), Nr2f2(0.06), Esrrg(0.05), Gper1(0.03), Abhd2(0.02), Bmp4(0.01), Nr6a1(-0.01), Nr1h2(-0.01), Esrra(-0.06), Hnf4a(-0.1), Nr1i2(-0.1), Thra…
RNA polymerase II transcription coactivator activity	0.0359265	0.226143	0.000196016	0.000847807	30	0.261374	0.0330982	0.0170273	0.0621558	0.0363129	Sox11(0.57), Sox11(0.57), Sox4(0.54), Tfap2a(0.49), Hipk2(0.42), Crebbp(0.4), Ankrd1(0.4), Smarca2(0.37), Myocd(0.37), Cited4(0.34), Cited2(0.27), Mef2a(0.26), Mkl2(0.25), Med12(0.23), Jade1(0.22), Med12l(0.18), Rere(0.12), Mkl1(0.11), Atn1(0.1), Tfap2b(0.06), Prrx1(-0.02), Wbp2(-0.02), Smarca4(-0.04), Sall1(-0.04), Trim28(-0.13), Pitx2(-0.17), Carm1(-0.23), Hyal2(-0.27), Wwox(-0.3), Sox12(-0.53),
intermediate filament	0.00192508	0.279341	0.000196961	0.000850852	42	0.0469107	0.14528	0.0119581	0.0526996	0.0943	Gja1(0.63), Dsp(0.5), Nes(0.48), Nes(0.48), Dst(0.46), Krt17(0.44), Synm(0.41), Sync(0.39), Iffo2(0.36), Krt18(0.3), Krt18(0.3), Nefm(0.29), Krt19(0.26), Krt4(0.26), Hspa8(0.24), Lmnb1(0.24), Krt23(0.24), Krt7(0.21), Iffo1(0.2), Adora2a(0.19), Jup(0.19), Tlk2(0.19), Tlk2(0.19), Vim(0.16), Vim(0.16), Myo5a(0.09), Krt10(0.08), Des(0.07), Krt14(0.01), Krt8(0.01), Krt8(0.01), Krt20(-0.01), Krt80(-0.0…
apical dendrite	0.04186	0.327038	0.000197555	0.000852379	14	0.0356556	0.0458747	0.0393446	0.273357	0.0191161	Flna(0.42), Slc17a8(0.36), Rgs12(0.34), Clu(0.29), Osbp2(0.26), Neurl1a(0.25), Cpeb3(0.2), Fas(0.19), Myo1d(0.17), Ptk2b(0.12), Ppargc1a(0.09), Nsmf(0.04), Arpc2(0.01), Ykt6(-0.01),
long-term synaptic potentiation	0.0432151	0.240291	0.000202675	0.000873405	26	0.214232	0.0520174	0.0112803	0.0769082	0.0372422	Ntrk2(0.94), Plk2(0.7), Drd1(0.69), Musk(0.67), Itpr3(0.62), Shank3(0.61), Reln(0.45), Serpine2(0.41), Rasgrf2(0.36), Braf(0.25), Mecp2(0.24), Unc13a(0.23), Camk2b(0.12), Ptk2b(0.12), Vamp2(0.07), Shank2(0.03), Pten(0.02), Rgs14(0.02), Prkcz(0), Stx3(0), Mapk1(-0.01), Snca(-0.02), Stx4a(-0.02), Snap47(-0.22), Dbi(-0.35), Syt12(-0.38),
osteoclast differentiation	0.0366428	0.229335	0.000204892	0.000881881	28	0.0550329	0.00182534	0.253014	0.111948	0.064815	Cd300lf(1.12), Trf(0.61), Junb(0.5), Sbno2(0.48), Epha2(0.41), Calcr(0.32), Gab2(0.27), Gab2(0.27), Csf1(0.24), Tnfrsf11a(0.23), Gpc3(0.17), Csf1r(0.12), Traf6(0.11), Nfatc1(0.1), Dcstamp(0.1), Ctnnb1(0.03), Ireb2(0.03), Mitf(0.01), Mapk14(0), Snx10(0), Ostm1(-0.01), Chuk(-0.02), Chuk(-0.02), Glo1(-0.07), Farp2(-0.11), Gpr183(-0.11), Tnf(-0.19), Tfrc(-0.36),
positive regulation of long-term synaptic potentiation	0.0445731	0.348672	0.000205195	0.000882114	12	0.278699	0.0687243	0.0466858	0.0400078	0.00819345	Drd1(0.69), Nrgn(0.68), Shank3(0.61), Reln(0.45), Kalrn(0.39), Creb1(0.19), Eif2ak4(0.17), Adrb1(0.04), Stau1(0.03), Hnrnpk(0.01), Nos1(0.01), Crtc1(-0.11),
positive regulation of protein tyrosine kinase activity	0.0465542	0.269574	0.000206776	0.000887832	20	0.120415	0.00981092	0.0285281	0.127443	0.0887769	Dok7(0.64), Dok7(0.64), Hsph1(0.63), Egf(0.56), Pdgfb(0.45), Reln(0.45), Reln(0.45), Erbb3(0.35), Srcin1(0.24), Ptpn1(0.19), Gprc5b(0.13), Csf1r(0.12), Dvl2(0.06), Lrp8(0), Agrn(-0.05), Unc119(-0.09), Ace(-0.21), Gas6(-0.35), Grem1(-0.47), Agt(-0.75),
potassium ion transport	0.0282035	0.167329	0.000208827	0.000895551	76	0.188058	0.0511544	0.00171854	0.0224901	0.329609	Kcnc2(0.86), Kcnt1(0.65), Kcnab1(0.53), Kcne4(0.47), Slc24a3(0.43), Abcc9(0.42), Kcna5(0.4), Kcna5(0.4), Kcnab2(0.37), Slc9a7(0.37), Kcnh2(0.35), Atp1a2(0.35), Gja5(0.34), Kcnj8(0.34), Kcnip4(0.3), Kcns3(0.3), Kcnt2(0.29), Kcnj2(0.28), Kcnd3(0.27), Kcnn3(0.27), Kcnmb1(0.24), Tsc1(0.23), Tsc1(0.23), Kcnk3(0.2), Kcnj5(0.18), Slc12a1(0.17), Slc12a2(0.16), Slc12a4(0.16), Cdkn1b(0.14), Kcnq1(0.14), At…
protein phosphatase type 2A complex	0.0503021	0.271937	0.00021649	0.00092729	20	0.0989103	0.0515149	0.122399	0.0249779	0.0338163	Strn(0.28), Ppp2r2b(0.21), Ppp2r2b(0.21), Nkd1(0.19), Ppp2cb(0.11), Ppp2r5a(0.08), Ppp2r3a(0.05), Ppp2r5e(0.03), Strn3(0.03), Ppp2r2a(0.01), Ppp2r2a(0.01), Ppp2ca(0), Ppp2ca(0), Ppp2r1a(-0.02), Ppp2r1a(-0.02), Ppp2r2d(-0.04), Strn4(-0.06), Ppp2r5c(-0.1), Ptpa(-0.14), Ptpa(-0.14),
positive regulation of JAK-STAT cascade	0.0477435	0.310278	0.000217884	0.000932131	15	0.166925	0.0554038	0.0421319	0.0961066	0.0114921	Cxcl5(1.3), Il6(1.24), Notch1(0.64), Il6ra(0.54), Stra6(0.37), Cyp1b1(0.24), Agap2(0.24), F2r(0.17), Kit(0.17), Hes1(0.12), Crlf3(0.05), Adipor1(0.01), Ghr(-0.09), Cenpj(-0.11), Akr1b3(-0.27),
negative regulation of cell cycle	0.0402777	0.244284	0.000223659	0.000955682	27	0.230245	0.116977	0.0109775	0.0507318	0.0231622	Inhba(1.17), Ptgs2(1.16), Nr4a1(0.58), Nupr1(0.4), Bmp2(0.34), Casp3(0.3), Tgfb1(0.28), Runx3(0.27), Mapk12(0.27), Ppp1r13b(0.25), Rps6ka2(0.24), Gata3(0.18), Gata3(0.18), Rb1(0.15), Hpgd(0.11), Rnf167(0.11), Bmp7(0.07), Ptprk(0.05), Bmp4(0.01), Rhob(-0.04), Men1(-0.06), Cebpa(-0.08), Cdk5(-0.09), Taf6(-0.16), Gmnn(-0.21), Cdk6(-0.22), Pla2g16(-0.24),
regulation of cell growth	0.0232096	0.202989	0.000225419	0.000962042	44	0.266349	0.11332	0.0137527	0.00846668	0.0778604	Clstn3(0.92), Csf2rb(0.8), Igfbp1(0.71), Htra4(0.6), Igfbp3(0.55), Esm1(0.51), Cd44(0.49), Wisp1(0.38), Nanos1(0.37), Socs2(0.36), Ctgf(0.35), Nov(0.34), Sgk2(0.3), Crim1(0.29), Igfbp5(0.28), 4932438A13Rik(0.28), Cyr61(0.26), Sgk1(0.26), Epb41l3(0.2), Tmc8(0.2), Fam107a(0.19), Wfdc1(0.17), Wfdc1(0.17), Rb1(0.15), Cdc73(0.12), Il3ra(0.09), Sbf1(0.08), Igfbp6(0.05), Pot1b(0.05), Stk11(0.02), Tsg101…
N-acetylgalactosamine 4-O-sulfotransferase activity	0.0412088	0.246078	0.000226558	0.000965737	24	0.0523036	0.0174988	0.0475458	0.0861765	0.140769	Hs3st3b1(0.6), Hs3st1(0.49), Chst1(0.48), Chst2(0.43), Sult5a1(0.4), Ust(0.3), Hs3st3a1(0.28), Ndst2(0.26), Chst8(0.26), Chst8(0.26), Chst11(0.22), Ndst1(0.18), Sult1e1(0.13), Chst3(0.13), Sult1a1(0.08), Hs6st1(0.07), Sult1b1(-0.01), Chst14(-0.02), Sult1c2(-0.04), Hs2st1(-0.09), Hs6st2(-0.13), Chst7(-0.18), Sult1d1(-0.2), Hs3st6(-0.2),
R-SMAD binding	0.0479833	0.255815	0.000229879	0.000978714	22	0.0500431	0.0211708	0.159125	0.0755897	0.0422364	Fos(0.83), Jun(0.69), Smad3(0.4), Ankrd1(0.4), Myocd(0.37), Smad6(0.36), Zeb2(0.32), Rgcc(0.27), Smurf1(0.27), Ldlrad4(0.25), Trim33(0.25), Pmepa1(0.24), Zc3h3(0.24), Ranbp3l(0.11), Smad4(0.05), Axin1(0.01), Smad2(-0.03), Ppm1a(-0.05), Men1(-0.06), Ranbp3(-0.12), Ranbp3(-0.12), Parp1(-0.34),
positive regulation of B cell proliferation	0.0380345	0.206458	0.000233145	0.000991426	39	0.0653033	0.229879	0.149373	0.0152789	0.0088449	Tlr4(0.55), Cd38(0.52), Cd38(0.52), Irs2(0.49), Ptprc(0.31), Ptprc(0.31), Mef2c(0.26), Cd40(0.26), Cd40(0.26), Bcl6(0.25), Ada(0.24), Bcl2(0.24), Peli1(0.23), Tirap(0.21), Clcf1(0.18), Nckap1l(0.16), Cdkn1a(0.15), Nfatc2(0.15), Tnfsf13b(0.15), Tnfsf13b(0.15), Vav3(0.11), Atad5(0.11), Sash3(0.1), Bmi1(-0.01), Ticam1(-0.05), Bst1(-0.07), Il7(-0.07), Il7(-0.07), Chrnb2(-0.09), Chrnb2(-0.09), Cd74(-0…
regulation of MAPK cascade	0.0248673	0.230331	0.000236454	0.00100429	33	0.0866384	0.0512435	0.0736937	0.135769	0.011498	Inhba(1.17), Ntrk2(0.94), Inhbb(0.79), Tlr13(0.42), Bmp2(0.34), Cd24a(0.34), Id1(0.32), Tgfb3(0.3), Nf1(0.29), Ren1(0.28), Tgfb1(0.28), Stk40(0.28), Bmp3(0.26), Tgfb2(0.23), Bmp1(0.22), Timp2(0.21), Phlpp1(0.21), Syngap1(0.16), Rnf41(0.09), Bmp7(0.07), Pak1(0.06), Bmp8a(0.04), Grb2(0.03), Ulk4(-0.03), Gdf15(-0.04), E130311K13Rik(-0.06), Gdf11(-0.12), Vrk2(-0.19), Bmp6(-0.24), Gdf10(-0.29), Psap(-…
cellular response to retinoic acid	0.0477139	0.197105	0.00023771	0.00100841	37	0.113267	0.0478013	0.0228268	0.0272729	0.15472	Ret(0.51), Rorb(0.49), Epha3(0.46), Kmt2e(0.38), Ptk7(0.34), Setx(0.34), Abl2(0.3), Adnp2(0.3), Rarg(0.27), Mef2c(0.26), Tead1(0.26), Cyp26b1(0.16), Tead2(0.15), Abca1(0.14), Aldh1a2(0.14), Rara(0.14), Ptk2b(0.12), Yap1(0.12), Lyn(0.11), Phc1(0.09), Aqp1(0.08), Osr1(0.08), Sox9(0.04), Hoxa2(0), Add1(-0.03), Yes1(-0.03), Snw1(-0.04), Snw1(-0.04), Ogt(-0.04), Tesc(-0.07), Halr1(-0.08), Hoxa1(-0.09)…
B cell receptor signaling pathway	0.0189164	0.285812	0.000239251	0.00101373	23	0.468816	0.206295	0.0350217	0.0385454	0.000430421	Syk(0.63), Nfam1(0.53), Cd38(0.52), Rftn1(0.32), Ptprc(0.31), Mef2c(0.26), Bcl2(0.24), Klhl6(0.2), Abl1(0.19), Tec(0.16), Nckap1l(0.16), Nfatc2(0.15), Lyn(0.11), Vav3(0.11), Plcg2(0.1), Bcar1(0.03), Lck(0.03), Prkcb(0.01), Mapk1(-0.01), Lat2(-0.03), Lat2(-0.03), Plekha1(-0.04), Ptpn6(-0.06),
negative regulation of oligodendrocyte differentiation	0.0532621	0.377293	0.000242394	0.00102583	10	0.0809147	0.060462	0.0224949	0.0973349	0.0605463	Dusp10(0.72), Notch1(0.64), Id4(0.51), Nf1(0.29), Hes1(0.12), Hes1(0.12), Id2(0.07), Ctnnb1(0.03), Bmp4(0.01), Sirt2(-0.08),
glucocorticoid receptor binding	0.0433574	0.282927	0.000253516	0.00107161	18	0.0488361	0.0814359	0.0661957	0.181396	0.0104907	Nr4a3(0.99), Nr4a2(0.91), Nr4a1(0.58), Nrip1(0.39), Ets2(0.33), Ep300(0.33), Grip1(0.27), Flt3(0.26), Ncor2(0.23), Ncoa2(0.22), Stat3(0.21), Cebpb(0.1), Stat5b(0.07), Pias2(-0.03), Ipo13(-0.15), Ywhah(-0.18), Fkbp4(-0.29), Psmc3ip(-0.37),
positive regulation of axonogenesis	0.0366473	0.236801	0.000254574	0.0010748	27	0.0569996	0.168418	0.00524794	0.137258	0.0570921	Ntrk2(0.94), Plxnb1(0.39), Skil(0.33), Zeb2(0.32), Tiam1(0.31), Tiam1(0.31), Robo1(0.28), Braf(0.25), Braf(0.25), Dixdc1(0.24), Robo2(0.17), Golga2(0.16), Nin(0.12), Stk25(0.12), Stk25(0.12), Map2k1(0.09), Rufy3(0.07), Stk11(0.02), Sema4d(0.01), Sema4d(0.01), Plxnb2(-0.02), Map2k2(-0.08), Ache(-0.13), Metrn(-0.18), Amigo1(-0.18), Amigo1(-0.18), Rpl4(-0.2),
Rac GTPase binding	0.0398558	0.19568	0.000255046	0.00107551	41	0.28359	0.0404892	0.0566455	0.0735433	0.00774929	Srgap1(0.53), Ncf2(0.52), Flna(0.42), Farp1(0.33), Cdkl5(0.32), Tiam1(0.31), Fmnl1(0.3), Srgap3(0.27), Iqgap1(0.22), Dock7(0.19), Dock7(0.19), Arhgap4(0.19), Iqgap2(0.19), Dock4(0.18), Ocrl(0.18), Atp7a(0.17), Cav1(0.16), Hace1(0.14), Arhgef2(0.12), Als2(0.12), Abi2(0.11), Dvl3(0.1), Srgap2(0.1), Srgap2(0.1), Eps8(0.08), Mtss1l(0.08), Dvl2(0.06), Ralbp1(0.04), Arhgdib(0.03), Cyfip1(0.01), Map3k11…
steroid hydroxylase activity	0.0316388	0.298084	0.000259227	0.00109184	20	0.00227211	0.0211049	0.0953343	0.370617	0.105009	Ch25h(0.76), Cyp2b10(0.74), Cyp2b10(0.74), Cyp2d12(0.63), Cyp2d9(0.35), Cyp2d26(0.24), Cyp2c44(0.18), Cyp2j13(0.14), Cyp2j9(0.12), Cyp2e1(0.11), Cyp2j11(0.11), Cyp2j6(0.09), Cyp2f2(0.08), Cyp2d22(0.06), Cyp2s1(0.06), Cyp2j5(-0.01), Cyp2a4(-0.11), Cyp2u1(-0.24), Cyp2a5(-0.3), Cyp2r1(-0.62),
transcription factor activity, RNA polymerase II core promoter proximal region sequence-specific binding	0.0318942	0.260303	0.000261433	0.00109982	24	0.165923	0.00534165	0.0914529	0.0371874	0.132012	Jun(0.69), Fosl2(0.6), Tfap2a(0.49), Egr1(0.48), Ets1(0.41), Tead1(0.26), Spi1(0.24), Sp1(0.22), Sp1(0.22), Arntl2(0.13), Arntl(0.1), Srebf1(0.09), Batf3(0.09), Fosl1(-0.01), Clock(-0.02), Rbpj(-0.05), Creb3(-0.09), Pax2(-0.19), Batf2(-0.23), Ddn(-0.27), Ddn(-0.27), Snai3(-0.31), Irf7(-0.45), Irf7(-0.45),
platelet activation	0.0498001	0.233891	0.000264399	0.00111098	26	0.0678086	0.10949	0.0892152	0.0434265	0.0244074	P2ry12(0.74), Pf4(0.71), Itgb3(0.67), F5(0.49), Entpd1(0.47), Mertk(0.3), Gna13(0.2), Rap2b(0.2), Pik3cb(0.18), F2r(0.17), Axl(0.17), Srf(0.16), P2rx1(0.15), Evl(0.14), Vwf(0.12), Tyro3(0.11), Fgg(0.05), Fgb(0.03), F8(0.01), Fzd6(0), Fga(-0.12), Cx3cl1(-0.14), P2ry1(-0.16), C1galt1c1(-0.19), Bloc1s3(-0.2), Entpd2(-0.39),
microtubule-based movement	0.0418439	0.181102	0.000269475	0.00113096	46	0.344739	0.0452741	0.103891	0.010117	0.0194889	Kif23(0.66), Dnah12(0.6), Dnah17(0.58), Kif13b(0.4), Stard9(0.36), Kif7(0.26), Dync1h1(0.25), Klc1(0.25), Kif21b(0.24), Casc1(0.23), Kifc2(0.22), Dync2h1(0.22), Kif1b(0.19), Kif13a(0.18), Kif3c(0.17), Kif26b(0.17), Ktn1(0.15), Kif21a(0.14), Kif5c(0.12), Kif3b(0.11), Kif5b(0.11), Dync1li2(0.11), Bicd2(0.1), Kif1c(0.07), Kif2a(0.06), Dync1i2(0.05), Kif9(0.05), Kif20b(0.04), Kif3a(0.02), Kif27(0.01)…
immunological synapse	0.0312386	0.24568	0.000270334	0.00113323	30	0.207962	0.174683	0.0402633	0.0199337	0.0144754	Havcr2(0.71), Cd53(0.58), Prkcq(0.46), Ptprj(0.43), Ptprj(0.43), Myh9(0.39), Myh9(0.39), Lgals3(0.27), Lgals3(0.27), Itgal(0.24), Bcl10(0.16), Socs6(0.16), Coro1a(0.15), Coro1a(0.15), Alcam(0.14), Cd37(0.14), Carmil2(0.13), Dlg1(0.06), Dlg1(0.06), Ezr(0.06), Prkar1a(0.05), Lck(0.03), Stx7(-0.03), Pdcd6ip(-0.04), Arhgdia(-0.05), Dusp3(-0.1), Icam1(-0.13), Snx27(-0.17), Cd81(-0.18), Stoml2(-0.26),
endoderm formation	0.0340376	0.34585	0.000270978	0.00113458	13	0.00906034	0.00538159	0.07413	0.393816	0.134302	Nog(0.96), Sox7(0.62), Dusp1(0.57), Dusp5(0.35), Sox17(0.22), Dusp4(0.22), Tnrc6c(0.18), Lhx1(0.16), Hnf1b(0.14), Ctnnb1(0.03), Smad2(-0.03), Dusp2(-0.13), Eomes(-0.35),
lipid binding	0.0441403	0.084909	0.000273915	0.00114552	203	0.024863	0.00460609	0.282477	0.108874	0.0878862	Ptgs2(1.16), Nr5a2(0.93), Apob(0.76), Pfn3(0.71), Pgr(0.66), Ffar4(0.66), Dok7(0.64), Pitpnm3(0.64), Inpp4b(0.58), Fabp4(0.48), Dlc1(0.46), Dysf(0.45), Snx20(0.43), Fes(0.41), Paqr8(0.39), Btk(0.37), Esr1(0.37), Noxo1(0.36), Stard9(0.36), Fabp5(0.35), Ncf1(0.34), Fermt2(0.34), Osbpl6(0.33), Apod(0.32), Snx18(0.32), Ptgs1(0.31), Tiam1(0.31), Myo1e(0.3), Nf1(0.29), Fnbp1l(0.29), Stard13(0.29), Star…
fibroblast migration	0.0516321	0.37602	0.000275607	0.00115124	10	0.0948105	0.104102	0.0340989	0.0919759	0.0226421	Arid5b(0.54), Schip1(0.36), Syne2(0.36), Nov(0.34), Pml(0.32), Zfand5(0.32), Tns1(0.15), Pip5k1a(0.1), Sgpl1(0.08), Tmem201(-0.37),
regulation of stem cell population maintenance	0.0511689	0.307086	0.000275957	0.00115134	15	0.132913	0.110242	0.107136	0.00677892	0.0469478	Tal1(0.35), Ncoa3(0.24), Kdm3a(0.24), Elavl1(0.15), Nfya(0.11), Cnot1(0.09), Cnot1(0.09), Kdm4c(0.08), Cnot3(0.06), Cnot3(0.06), Tcf7l1(0.01), Cnot2(0), Cnot2(0), Sav1(-0.04), Smo(-0.26),
dendritic shaft	0.0404773	0.20065	0.000280075	0.00116714	40	0.32293	0.126841	0.0237915	0.0209922	0.0179005	Drd1(0.69), Cacna1c(0.5), Map2(0.47), Flna(0.42), Dbn1(0.4), Grk3(0.4), Kirrel(0.39), Hspa8(0.24), Gsk3b(0.22), Homer1(0.21), Lzts1(0.19), Syngap1(0.16), Lpar1(0.14), Gabbr1(0.14), Arhgef2(0.12), Dlg3(0.1), Slc12a5(0.1), Grm7(0.08), Zmynd8(0.08), Fmr1(0.07), Grk2(0.04), Ctnnb1(0.03), Nsf(0.03), Gper1(0.03), Inpp5j(0.03), Prex1(0.03), Slc8a1(0.01), Arpc2(0.01), Slc1a2(-0.01), Whrn(-0.01), Asic1(-0…
phosphoric diester hydrolase activity	0.0353883	0.195834	0.000286448	0.0011923	42	0.0850732	0.0925399	0.0144499	0.050743	0.11865	Pde1c(0.62), Pde10a(0.52), Pde6a(0.47), Pde3a(0.43), Plce1(0.39), Pde4d(0.33), Plcd1(0.3), Pde3b(0.29), Pde8b(0.28), Plcb1(0.27), Plcl1(0.27), Pde7b(0.23), Plcxd1(0.23), Pde9a(0.22), Tdp2(0.22), Plcg1(0.2), Pde2a(0.2), Pde7a(0.19), Pde4c(0.17), Pde1a(0.14), Gpcpd1(0.13), Pde8a(0.12), Gdpd1(0.12), Plcb2(0.11), Pde4a(0.1), Plcg2(0.1), Plch2(0.1), Pde1b(0.09), Gdpd5(0.07), Plcd3(-0.01), Plcb3(-0.05)…
regulation of bone mineralization	0.0479326	0.323187	0.000294349	0.00122374	14	0.106955	0.239695	0.0280036	0.0167878	0.0447005	Cyp27b1(0.69), Gja1(0.63), S1pr1(0.59), Twist1(0.57), Ddr2(0.38), Bglap3(0.36), Ecm1(0.21), Omd(0.15), Nbr1(0.14), Ptk2b(0.12), Bmp2k(0.07), Ank(0), Mgp(-0.09), Txlng(-0.18),
cellular calcium ion homeostasis	0.0361709	0.134063	0.000297847	0.00123683	82	0.0156424	0.0125178	0.113769	0.128672	0.172586	Atp2a1(0.84), Ryr1(0.74), Stc1(0.69), Stc1(0.69), Itgb3(0.67), Ccr1(0.6), Inpp4b(0.58), Itgav(0.53), Cacna1c(0.5), Slc24a3(0.43), Pkd2(0.3), Tgfb1(0.28), Ccl2(0.27), Cd40(0.26), Cd40(0.26), Tpcn2(0.25), Bcl2(0.24), Sv2a(0.23), Atp2b2(0.21), Pygm(0.21), Stim1(0.19), Atp2b1(0.19), Pik3cb(0.18), Calca(0.17), Xk(0.17), Herpud1(0.17), Cav1(0.16), Cav1(0.16), Nucb2(0.15), Atp2a2(0.14), Atp2a2(0.14), At…
cysteine-type peptidase activity	0.0530991	0.11224	0.000301305	0.00124973	127	0.106517	0.0587904	0.0853061	0.0185807	0.0798338	Ctla2b(0.69), Ctla2a(0.61), Pgpep1l(0.58), Tnfaip3(0.54), Zc3h12a(0.46), Cflar(0.45), Casp4(0.43), 4930486L24Rik(0.42), Usp27x(0.38), Myrf(0.34), Ctsc(0.31), Casp3(0.3), Casp3(0.3), Usp47(0.29), Capn5(0.26), Zranb1(0.26), Usp2(0.25), Otud7b(0.24), Usp43(0.23), Trabd2b(0.23), Usp9x(0.22), Usp13(0.22), Yod1(0.21), Uchl1(0.2), Usp42(0.2), Uspl1(0.2), Usp11(0.2), Usp33(0.19), Usp34(0.18), Capn13(0.18…
protein C-terminus binding	0.0411695	0.0943029	0.000302228	0.00125209	182	0.12161	0.0578692	0.101142	0.0292159	0.0390832	Slc4a1(0.91), Hpcal4(0.72), Shank3(0.61), Shank3(0.61), Atxn1(0.53), Ncf2(0.52), Vgll3(0.5), Sdcbp2(0.46), Cep250(0.43), Hspg2(0.4), Tjp1(0.4), Sirt1(0.4), Sdc1(0.39), Prrc2c(0.36), Ctgf(0.35), Tcf4(0.35), Brd4(0.33), Ago2(0.33), Ep300(0.33), Id1(0.32), Zbtb16(0.32), Jak2(0.31), Lmo7(0.3), Ercc1(0.29), Nipbl(0.29), Optn(0.27), Grip1(0.27), Ppp1r9b(0.27), Src(0.26), Erbb2(0.25), Procr(0.25), Homer…
protein targeting to Golgi	0.0543079	0.356361	0.00031234	0.00129247	11	0.0528433	0.156627	0.091328	0.0295466	0.0357402	Sorl1(0.36), Golga4(0.31), Optn(0.27), Optn(0.27), Gcc1(0.25), Rab33b(0.12), Gcc2(0.08), Rab6a(0.07), Pacs1(0.07), Golga1(-0.05), Sys1(-0.1),
SNARE binding	0.0424303	0.164349	0.000316574	0.00130846	62	0.317107	0.140904	0.0355914	0.0195329	0.0131831	Stx1b(0.69), Stx11(0.68), Syt5(0.48), Stx1a(0.34), Stx1a(0.34), Tnfaip2(0.33), Exoc3l2(0.25), Syt7(0.23), Lrrk2(0.23), Unc13a(0.23), Stxbp1(0.2), Stx5a(0.18), Stx2(0.17), Stx2(0.17), Cav1(0.16), Cav2(0.16), Syt11(0.15), Stx6(0.14), Gosr2(0.11), Adcy6(0.09), Myo5a(0.09), Syt9(0.08), Vamp2(0.07), Vamp2(0.07), Stx17(0.07), Stx17(0.07), Exoc3l(0.07), Cplx2(0.06), Kcnb1(0.06), Stx12(0.04), Gosr1(0.03)…
epidermis development	0.0324783	0.212273	0.000317697	0.00131157	34	0.384727	0.0168815	0.00460306	0.167094	0.0492169	Notch1(0.64), Sprr2f(0.56), Evpl(0.38), Igf1r(0.33), Insr(0.32), Ptch2(0.3), Ovol2(0.29), Grhl2(0.29), Grhl2(0.29), Trp63(0.27), Egfr(0.25), Ovol1(0.25), Ovol1(0.25), Grhl1(0.23), Grhl1(0.23), Gab1(0.17), Ppard(0.16), Ptch1(0.15), Ntf5(0.15), Satb1(0.14), Scel(0.13), Krt10(0.08), Ift172(0.06), Atp2c1(0.06), Kif3a(0.02), Ntf3(-0.02), Ift74(-0.04), Zfp750(-0.04), Ift88(-0.05), Aldh3a2(-0.07), Plod1…
adenosine receptor signaling pathway	0.0314973	0.421345	0.000318131	0.00131183	11	0.288825	0.18684	0.00596309	0.0320727	0.033944	P2ry12(0.74), Adora1(0.32), Adora2b(0.32), Adora2a(0.19), Adora2a(0.19), Adora2a(0.19), Adora2a(0.19), Adcy5(0.1), Gnai2(-0.09), Gnai2(-0.09), P2ry1(-0.16),
cytoplasmic side of plasma membrane	0.0480811	0.185386	0.000320112	0.00131846	41	0.192779	0.166925	0.0393743	0.0150714	0.0304934	Ptpn22(0.52), Ptpn22(0.52), Rgs2(0.51), Rgs2(0.51), Cdh1(0.38), Gem(0.37), Lor(0.31), Shroom4(0.25), Shroom4(0.25), Msn(0.21), Ldlrap1(0.21), Jup(0.19), Atp2b1(0.19), Kit(0.17), Pkp4(0.16), Ptp4a1(0.13), Fgfr3(0.12), Rnf31(0.12), Traf6(0.11), Pgm5(0.11), Pgm5(0.11), Atp2c2(0.09), Rab21(0.09), Chmp4b(0.07), Ptpn3(0.07), Dlg1(0.06), Birc2(0.05), Pten(0.02), Ikbkb(0), Chuk(-0.02), Ptpn4(-0.05), Epb4…
cytoplasmic mRNA processing body assembly	0.0601485	0.31452	0.000321798	0.00132386	14	0.0502265	0.0472326	0.102577	0.0900504	0.0437933	Noct(0.59), Ddx6(0.34), Ddx6(0.34), Rc3h1(0.33), Dync1h1(0.25), Patl1(0.15), Patl1(0.15), Atxn2(0.09), Lsm14a(0.04), Edc3(0.04), Limd1(0.01), Cnot7(-0.02), Lsm3(-0.06), Lsm4(-0.24),
release of sequestered calcium ion into cytosol	0.0431365	0.243576	0.000328862	0.00135135	25	0.206641	0.0230286	0.0921419	0.0600845	0.0272594	Ryr1(0.74), Ryr1(0.74), Htr1b(0.65), Itgav(0.53), P2rx7(0.32), Fgf2(0.31), Ptprc(0.31), Pkd2(0.3), Pkd2(0.3), Ddit3(0.27), Tpcn2(0.25), F2r(0.17), Plcg2(0.1), Plcg2(0.1), Fkbp1b(0.05), Itpr1(0.04), Itpr1(0.04), Lck(0.03), Prkce(0.03), Mcoln1(-0.01), Ero1l(-0.02), Cherp(-0.07), Ibtk(-0.2), Fkbp1a(-0.22), Fkbp1a(-0.22),
layer formation in cerebral cortex	0.0494303	0.357221	0.000330337	0.00135584	11	0.221936	0.0137375	0.124087	0.0846522	0.017211	Cdk5r1(0.59), Reln(0.45), Gli3(0.43), Dab2ip(0.3), Socs7(0.18), Pafah1b1(0.17), Adgrg1(0.07), Ctnnb1(0.03), Mboat7(0.01), Lrp8(0), Cdk5(-0.09),
receptor signaling complex scaffold activity	0.0518076	0.343631	0.000334583	0.00137167	12	0.162564	0.0281931	0.109109	0.101561	0.0135213	Akap12(0.68), Mapk8ip3(0.3), Pxn(0.29), Grip1(0.27), Spag9(0.26), Lrrk2(0.23), Ldlrap1(0.21), Rgs14(0.02), Axin1(0.01), Magi2(-0.01), Magi2(-0.01), Shank1(-0.53),
autophagosome	0.047427	0.172899	0.000342869	0.00140402	57	0.0314539	0.00985358	0.270811	0.0653336	0.100557	Peg3(0.67), Trp53inp1(0.35), Trp53inp1(0.35), Wdfy3(0.25), Wdfy3(0.25), Hspa8(0.24), Ulk1(0.24), Atg14(0.21), Atg14(0.21), Trp53inp2(0.2), Trp53inp2(0.2), Usp33(0.19), Osbpl7(0.17), Zfyve1(0.16), Htt(0.15), Nbr1(0.14), Hap1(0.11), Rab23(0.11), Rab23(0.11), 3110043O21Rik(0.11), 3110043O21Rik(0.11), Fyco1(0.09), Pip4k2a(0.09), Map1lc3b(0.08), Tbc1d12(0.08), Atg9a(0.08), Cln3(0.07), Gabarapl1(0.03),…
ear development	0.0377562	0.386672	0.000344181	0.00140776	10	0.239725	0.101393	0.0162666	0.17568	0.00555842	Bcl2l11(0.46), Stra6(0.37), Rdh10(0.37), Ece1(0.37), Bcl2(0.24), Bcl2(0.24), Gata3(0.18), Shroom2(0.14), Ddr1(-0.13), Tcf15(-0.3),
interleukin-1 receptor binding	0.0273875	0.377244	0.000346654	0.00141624	14	0.339224	0.0359848	0.212239	0.0625117	0.00118831	Il1f6(0.75), Il1f6(0.75), Il1b(0.69), Il1rn(0.62), Il1rn(0.62), Il1f9(0.47), Tlr5(0.44), Il1rap(0.2), Myd88(-0.05), Irak4(-0.13), Irak1(-0.14), Trip6(-0.18), Tlr9(-0.46), Tlr9(-0.46),
RNA polymerase II core promoter sequence-specific DNA binding	0.0437592	0.154931	0.000349298	0.00142539	61	0.301675	0.0542599	0.0447324	0.0630906	0.0129227	Nr4a2(0.91), Fos(0.83), Sox11(0.57), Nfil3(0.54), Tfap2a(0.49), Tfap2a(0.49), Egr1(0.48), Gata6(0.43), Tal1(0.35), Ep300(0.33), Runx2(0.29), Heyl(0.29), Smad1(0.26), Nsd1(0.24), Spi1(0.24), Tcf7l2(0.23), Sp1(0.22), Gata2(0.2), Gata3(0.18), Sp3(0.17), H3f3b(0.15), Ikzf1(0.14), Ezh2(0.12), Yap1(0.12), Zfpm1(0.12), Cebpb(0.1), Nfatc1(0.1), Stat5a(0.1), Hoxb3(0.08), Mtf1(0.08), Stat5b(0.07), H2afz(0.…
antiporter activity	0.0455476	0.204218	0.000353102	0.00143867	35	0.0230926	0.0407359	0.0403585	0.294009	0.0605995	Slc9a3(0.73), Slc7a13(0.67), Slc37a1(0.63), Slc7a8(0.49), Slc24a3(0.43), Slc9a7(0.37), Slc7a2(0.36), Slc4a8(0.32), Slc9a9(0.3), Clcn6(0.29), Slc7a7(0.27), Slc9a4(0.26), Slc7a6(0.25), Slc4a3(0.24), Slc37a2(0.16), Slc4a2(0.11), Tmco3(0.11), Slc9a1(0.09), Clcn3(0.06), Slc8b1(0.04), Clcn7(0.03), Slc7a5(0.01), Slc8a1(0.01), Slc9a8(-0.01), Slc7a9(-0.05), Clcn4(-0.08), Slc26a6(-0.08), Slc47a1(-0.1), Clc…
cerebral cortex development	0.0521395	0.1745	0.000353364	0.00143867	46	0.187133	0.0615032	0.0495668	0.0537583	0.0297724	Ntrk2(0.94), Fat4(0.49), Reln(0.45), Lrp6(0.38), Hif1a(0.34), Tacc1(0.33), Nf1(0.29), Col3a1(0.27), Plcb1(0.27), Aspm(0.23), Tsc1(0.23), Btbd3(0.2), Cdon(0.18), Cep120(0.18), Pafah1b1(0.17), Pafah1b1(0.17), Pafah1b1(0.17), Tacc2(0.17), Dicer1(0.16), Cdh2(0.15), Bbs1(0.12), Ptprs(0.11), Afdn(0.1), Afdn(0.1), Tacc3(0.1), Trappc9(0.1), Bbs4(0.1), Bbs2(0.06), Nde1(0.03), Nde1(0.03), Wdr62(0.02), Hnrn…
[truncated: 1,449 more rows]
