# Supplementary material for: CXCL12 and MYC control energy metabolism to support adaptive responses after kidney injury
Source: Nat Commun. 2018 Sep 10;9:3660. doi: 10.1038/s41467-018-06094-4 (PMC6131511; doi:10.1038/s41467-018-06094-4)
Supplement: Supplementary file 7 — Supplementary Data 4 [file 41467_2018_6094_MOESM7_ESM.xlsx]

## Sheet: Down
Supplementary Data 4. Down-regulated gene ontology (GO) enrichment terms, comparing Myc KO and control mice.	p.geomean	stat.mean	p.val	q.val	set.size	15926.ReadsPerGene.out	15928.ReadsPerGene.out	15943.ReadsPerGene.out	15950.ReadsPerGene.out	15955.ReadsPerGene.out	Genes
structural constituent of ribosome	7.78857e-35	0.417322	6.82656e-155	1.3795e-151	215	5.92561e-23	5.41969e-39	1.89566e-29	7.97304e-36	1.10357e-37	Slc25a43(0.29), Slc25a29(0.25), Slc25a37(0.17), Rpl24(0.13), Rpl24(0.13), Rps27(0.12), Slc25a27(0.12), Slc25a45(0.12), Rpl19(0.11), Rpl3l(0.09), Rpl9(0.06), Rpl9(0.06), Ucp2(0.02), Slc25a22(0.02), Mrps6(0.02), Mrps6(0.02), Slc25a3(0.01), Rpl10(0.01), Rpl10(0.01), Slc25a25(0.01), Rps12(0), Rpl17(0), Rpl22l1(-0.01), Slc25a44(-0.04), Mrpl18(-0.05), Slc25a13(-0.06), Mrpl33(-0.06), Slc25a42(-0.07), Sl…
translation	1.0092e-33	0.360646	7.7982e-155	1.3795e-151	289	1.33832e-20	1.92842e-35	3.44334e-33	6.18839e-38	4.36561e-38	Gspt2(0.37), Slc25a43(0.29), Egfr(0.25), Slc25a29(0.25), Eif2ak3(0.24), Rrbp1(0.24), Eif4e3(0.2), Eif4g3(0.2), Rbm3(0.18), Slc25a37(0.17), Rpl24(0.13), Rpl24(0.13), Rps27(0.12), Slc25a27(0.12), Slc25a45(0.12), Eif3a(0.11), Rpl19(0.11), Rpl19(0.11), Rpl3l(0.09), Mtrf1l(0.09), Eif1(0.08), Denr(0.08), Aarsd1(0.07), Eif5b(0.07), Rpl9(0.06), Abtb1(0.06), Eif4g1(0.03), Eif2ak2(0.02), Ucp2(0.02), Slc25a…
ribosome	5.14118e-30	0.453971	6.26427e-134	7.38767e-131	157	1.54633e-22	2.38678e-33	1.17422e-25	9.15907e-29	9.12477e-33	Rrbp1(0.24), Rpl24(0.13), Rpl19(0.11), Rpl9(0.06), Mrps6(0.02), Rpl17(0), Rpl22l1(-0.01), Snca(-0.02), Canx(-0.05), Nck1(-0.05), Hspa14(-0.05), Mrpl18(-0.05), Mrpl33(-0.06), Rps27a(-0.08), Rpl30(-0.09), Mrps21(-0.09), Rpl11(-0.09), Mrps9(-0.11), Abcf1(-0.13), Rps6(-0.14), Dap3(-0.14), Mrpl39(-0.15), Rpl5(-0.15), Mrps33(-0.16), Rps17(-0.16), Mettl17(-0.16), Mrps25(-0.17), Mrps14(-0.17), Mrpl52(-0.…
intracellular ribonucleoprotein complex	2.25725e-21	0.277084	1.53351e-94	1.35639e-91	304	7.61203e-17	2.95243e-26	5.31186e-19	1.74051e-20	1.36533e-20	Zfp36(0.37), Erg(0.34), Ago2(0.33), Ago2(0.33), Zfp36l1(0.32), Zfp36l1(0.32), Csnk1e(0.32), Ago4(0.31), Dyrk1a(0.29), Hnrnph1(0.28), Hnrnpa3(0.27), Ddx5(0.26), Rbmxl1(0.25), Hspa8(0.24), Ago3(0.24), Lrrk2(0.23), Snrnp200(0.23), Iqgap1(0.22), Iqgap1(0.22), Gsk3b(0.22), Slbp(0.21), Trove2(0.19), Trove2(0.19), Casc3(0.18), Jmjd6(0.17), Actn4(0.16), Nfatc2(0.15), Secisbp2l(0.15), Hnrnpu(0.14), Rpl24(…
mitochondrial inner membrane	3.37502e-20	0.229192	1.22498e-77	8.66794e-75	385	3.41534e-06	2.51539e-11	3.62803e-17	2.80205e-32	7.95994e-26	Hsd3b2(0.68), Gatm(0.65), Rhbdl1(0.54), Hsd3b3(0.49), Hsd3b3(0.49), Herc2(0.48), Rhbdl3(0.41), Fgr(0.36), Cox8b(0.32), Nat8f1(0.31), Sfxn4(0.3), Slc25a43(0.29), Lgals3(0.27), Src(0.26), Slc25a24(0.26), Alas2(0.25), Coq10b(0.25), Slc25a29(0.25), Lrrk2(0.23), Letm2(0.23), Kmo(0.22), Nnt(0.21), Stat3(0.21), Rhbdl2(0.21), Ccdc109b(0.2), Ckmt1(0.18), Slc25a37(0.17), Slc25a51(0.17), Aifm3(0.16), Sirt3(…
rRNA processing	2.14345e-17	0.388106	1.06472e-76	6.27832e-74	125	1.61528e-12	4.39848e-21	1.02433e-18	4.91772e-16	7.09447e-17	Rnasel(0.8), Chd7(0.59), Sirt1(0.4), Las1l(0.35), Utp14b(0.25), Sbds(0.16), Sbds(0.16), Wbp11(0.03), Exosc10(0), Dis3l(-0.01), Exosc3(-0.04), Dis3l2(-0.04), Rrp1(-0.05), Skiv2l2(-0.06), Frg1(-0.07), Pdcd11(-0.07), Utp14a(-0.07), Suv39h1(-0.08), Isg20(-0.08), Ddx47(-0.08), Ddx47(-0.08), Ddx52(-0.08), Rpl11(-0.09), Mdn1(-0.09), Utp20(-0.1), Utp15(-0.11), Papd5(-0.11), Pop4(-0.12), Nsun4(-0.12), C1d…
cytosolic large ribosomal subunit	4.67999e-19	0.443208	2.57308e-74	1.30051e-71	95	1.48242e-11	1.3311e-21	3.75803e-12	3.27216e-15	1.49866e-23	Rpl24(0.13), Rpl24(0.13), Rpl19(0.11), Rpl19(0.11), Rpl3l(0.09), Rpl3l(0.09), Rpl9(0.06), Rpl9(0.06), Zfp622(0.01), Rpl10(0.01), Rpl10(0.01), Rps12(0), Rpl17(0), Rpl22l1(-0.01), Surf6(-0.02), Rpl30(-0.09), Rpl30(-0.09), Rpl11(-0.09), Rpl11(-0.09), Rpl5(-0.15), Rpl5(-0.15), Zcchc17(-0.16), Uba52(-0.2), Rpl7a(-0.2), Rpl7a(-0.2), Rpl4(-0.2), Rpl4(-0.2), Rsl24d1(-0.2), Rpl27a(-0.21), Rpl27a(-0.21), R…
cytosolic small ribosomal subunit	8.27864e-17	0.510357	1.41211e-68	6.24507e-66	65	1.19656e-13	3.68079e-24	4.40623e-12	3.36912e-13	1.09656e-14	Ddx3x(0.26), Hba-a2(0.24), Rps27(0.12), Hba-a1(0.11), Rps12(0), Rps12(0), Rps27a(-0.08), Mcts1(-0.1), Rps6(-0.14), Rps6(-0.14), Rps17(-0.16), Rps17(-0.16), Mrps18c(-0.18), Mrps18a(-0.21), Rps15a(-0.21), Rps23(-0.24), Rps23(-0.24), Rps25(-0.25), Eif2d(-0.26), Eif2d(-0.26), Rps18(-0.26), Rps21(-0.26), Rps21(-0.26), Rps2(-0.27), Rps2(-0.27), Rps24(-0.28), Rps24(-0.28), Rps3a1(-0.28), Rps10(-0.28), R…
ribosome biogenesis	6.2718e-13	0.410068	9.97791e-55	3.92243e-52	81	6.86098e-07	7.85531e-15	3.66496e-15	1.89938e-14	2.96271e-12	Ddx3x(0.26), Utp14b(0.25), Sbds(0.16), Isg20l2(0.04), Gnl1(0.03), Gnl3l(0.02), Surf6(-0.02), Efl1(-0.02), Ipo9(-0.04), Sdad1(-0.04), Dhx30(-0.06), Frg1(-0.07), Utp14a(-0.07), Gnl2(-0.07), Gtpbp10(-0.08), Drosha(-0.1), Gtpbp4(-0.1), Setd4(-0.1), Nvl(-0.11), Nsun4(-0.12), Nop14(-0.15), Rrn3(-0.15), Dcaf13(-0.16), 2410016O06Rik(-0.17), Wbscr22(-0.18), Eral1(-0.19), Rpl7a(-0.2), Mina(-0.2), Rsl24d1(-…
mitochondrial large ribosomal subunit	1.39529e-12	0.543937	1.28196e-53	4.53557e-51	45	5.84368e-10	5.36168e-12	7.85623e-13	4.67955e-14	1.5638e-12	Mrpl33(-0.06), Nsun4(-0.12), Mrpl39(-0.15), Mterf4(-0.15), Mrpl3(-0.19), Mrpl58(-0.21), Mrpl58(-0.21), Mrpl49(-0.22), Mrpl51(-0.22), Mrpl46(-0.22), Mrpl20(-0.23), Mrpl28(-0.24), Mrpl16(-0.24), Mrpl16(-0.24), Mrpl43(-0.24), Mrpl43(-0.24), Nsun3(-0.24), Mpv17l2(-0.24), Mrpl32(-0.25), Mrpl32(-0.25), Mrpl11(-0.28), Mrpl11(-0.28), Mrpl27(-0.28), Mrpl27(-0.28), Mrpl34(-0.28), Mrpl23(-0.29), Mrpl23(-0.2…
tRNA processing	1.01689e-11	0.386646	1.30189e-49	4.18736e-47	83	2.98796e-08	2.74875e-11	7.03533e-15	2.12406e-10	6.68062e-13	Elac1(0.18), Clp1(0.11), Tyw5(0.06), Trmt13(0.04), Trmt1l(0.02), Tyw3(0.02), Urm1(-0.02), Ptcd1(-0.02), Trmt44(-0.02), Adat3(-0.02), Mto1(-0.04), Tprkb(-0.04), Trmt2b(-0.08), Tsen34(-0.1), Ddx1(-0.1), 6430573F11Rik(-0.1), Trit1(-0.11), Gtpbp3(-0.11), Pop4(-0.12), Ctu2(-0.12), Fars2(-0.12), Osgepl1(-0.13), Pus7l(-0.13), Ssb(-0.14), Trdmt1(-0.15), Trmu(-0.15), Lsm6(-0.15), Pus10(-0.16), Grsf1(-0.16…
mitochondrial small ribosomal subunit	1.66561e-10	0.487409	2.96378e-41	8.7382e-39	44	3.24595e-06	2.92686e-10	6.97029e-10	2.71746e-12	1.37113e-10	Mrps6(0.02), Mrps6(0.02), Mrps21(-0.09), Mrps21(-0.09), Mrps9(-0.11), Dap3(-0.14), Mrps25(-0.17), Mrps14(-0.17), Mrps14(-0.17), Mrps18c(-0.18), Mrps18c(-0.18), Mrps15(-0.19), Mrps15(-0.19), Mrps15(-0.19), Mrps5(-0.19), Mrps31(-0.2), Mrps36(-0.2), Mrps18a(-0.21), Mrps18a(-0.21), Mrps18a(-0.21), Mrpl42(-0.23), Mrps24(-0.25), Mrps7(-0.27), Mrps7(-0.27), Mrps11(-0.27), Mrps11(-0.27), Mrps11(-0.27), M…
protein methyltransferase activity	3.66951e-09	0.341672	4.05783e-37	1.10435e-34	81	2.38048e-06	1.33267e-09	9.36475e-13	2.14391e-07	5.41425e-09	Prdm1(0.57), Prdm11(0.41), Prdm4(0.23), Mettl6(0.15), Mettl10(0.12), Mepce(0.08), Prdm10(0.07), Bmt2(0.06), Prdm5(0.05), Alkbh8(0.04), Ehmt1(0.03), Trmt1l(0.02), Tgs1(-0.01), Prmt9(-0.02), Nsun6(-0.03), Smyd4(-0.04), Suv39h1(-0.08), Ehmt2(-0.08), Setd4(-0.1), 6430573F11Rik(-0.1), Nsun7(-0.12), Nsun4(-0.12), Mettl25(-0.12), Mettl24(-0.13), Trmt2a(-0.14), Mettl21a(-0.15), Mettl17(-0.16), Mettl16(-0…
proteasome complex	5.27766e-09	0.369712	4.0812e-35	1.03138e-32	66	0.00106592	1.69011e-08	1.43823e-10	1.55618e-11	1.087e-09	Zfand2a(0.3), Ubr1(0.11), Ube3a(0.06), Psme4(0.06), Psmd11(0.03), Wfs1(-0.01), Shfm1(-0.02), Shfm1(-0.02), Usp25(-0.02), Ubqln1(-0.02), Vcp(-0.04), Psme2(-0.06), Hspb1(-0.08), Psmd2(-0.09), Psmd2(-0.09), Psmd1(-0.09), Psmd1(-0.09), Psmd3(-0.1), Psmd6(-0.1), AI314180(-0.1), Psmb7(-0.12), Psmc1(-0.12), Psma2(-0.13), Adrm1(-0.13), Uchl5(-0.14), Psmc2(-0.16), Psmc5(-0.16), Psmc6(-0.16), Psmc3(-0.17),…
aminoacyl-tRNA ligase activity	1.05079e-08	0.48507	4.47847e-35	1.05632e-32	38	3.07903e-06	5.14229e-08	2.60829e-09	2.13178e-11	8.54862e-08	Lars2(0.02), Cars2(-0.05), Wars2(-0.09), Iars2(-0.09), Eprs(-0.1), Fars2(-0.12), Aars(-0.13), Hars2(-0.14), Cars(-0.18), Hars(-0.19), Dalrd3(-0.2), Aars2(-0.22), Rars(-0.23), Sars2(-0.27), Rars2(-0.27), Mars2(-0.27), Dars2(-0.27), Wars(-0.28), Nars(-0.28), Farsa(-0.29), Lars(-0.29), Kars(-0.3), Vars2(-0.31), Nars2(-0.31), Tars2(-0.35), Sars(-0.37), Dars(-0.37), Vars(-0.39), Tars(-0.4), Gars(-0.4)…
tRNA (guanine) methyltransferase activity	1.14877e-08	0.340241	2.55964e-34	5.66e-32	76	1.13498e-05	1.75449e-08	7.45038e-13	1.2404e-06	7.86298e-09	Prdm1(0.57), Prdm11(0.41), Prdm4(0.23), Mettl6(0.15), Mettl10(0.12), Mepce(0.08), Prdm10(0.07), Bmt2(0.06), Prdm5(0.05), Alkbh8(0.04), Ehmt1(0.03), Trmt1l(0.02), Tgs1(-0.01), Prmt9(-0.02), Nsun6(-0.03), Smyd4(-0.04), Ehmt2(-0.08), Setd4(-0.1), 6430573F11Rik(-0.1), Nsun7(-0.12), Nsun4(-0.12), Mettl25(-0.12), Mettl24(-0.13), Trmt2a(-0.14), Mettl21a(-0.15), Mettl17(-0.16), Mettl16(-0.16), Trmt10b(-0…
mitochondrial ribosome	1.34341e-08	0.547965	4.49995e-34	9.36519e-32	29	2.02524e-06	5.04536e-07	2.49341e-09	1.61722e-09	2.9373e-09	Dap3(-0.14), Mrpl48(-0.19), Mrpl48(-0.19), Mrps15(-0.19), Mrpl37(-0.2), Mrpl40(-0.21), Mrpl40(-0.21), Mrpl49(-0.22), Mrpl51(-0.22), Mrpl51(-0.22), Mrpl20(-0.23), Mrpl20(-0.23), Mrpl28(-0.24), Mtg2(-0.25), Mrps24(-0.25), Ndufa7(-0.25), Mrpl30(-0.27), Mrps12(-0.28), Chchd1(-0.28), Mrpl23(-0.29), Mrpl13(-0.31), Mrpl13(-0.31), Mrpl57(-0.34), Mrpl47(-0.34), Mrpl38(-0.35), Mrpl19(-0.38), Gadd45gip1(-0.…
tRNA (cytosine-5-)-methyltransferase activity	1.65879e-08	0.336976	1.28689e-33	2.52946e-31	76	1.3755e-05	3.08656e-08	1.48282e-12	2.18605e-06	5.53888e-09	Prdm1(0.57), Prdm11(0.41), Prdm4(0.23), Mettl6(0.15), Mettl10(0.12), Mepce(0.08), Prdm10(0.07), Bmt2(0.06), Prdm5(0.05), Alkbh8(0.04), Ehmt1(0.03), Trmt1l(0.02), Tgs1(-0.01), Prmt9(-0.02), Nsun6(-0.03), Smyd4(-0.04), Ehmt2(-0.08), Setd4(-0.1), 6430573F11Rik(-0.1), Nsun7(-0.12), Nsun4(-0.12), Mettl25(-0.12), Mettl24(-0.13), Trmt2a(-0.14), Trdmt1(-0.15), Mettl21a(-0.15), Mettl17(-0.16), Mettl16(-0.…
mitochondrial translation	2.29279e-08	0.466122	4.59655e-33	8.55926e-31	39	1.60807e-05	2.46906e-08	2.30655e-08	3.74103e-09	3.31895e-09	Mrps6(0.02), Mterf3(-0.02), Mrps21(-0.09), Qrsl1(-0.13), Qrsl1(-0.13), Gfm2(-0.13), Mterf4(-0.15), Mrps25(-0.17), Mrps18c(-0.18), Hars(-0.19), Mrps15(-0.19), Mrps15(-0.19), Mrps18a(-0.21), Mrps18a(-0.21), Mrpl51(-0.22), Gatb(-0.22), Gatb(-0.22), Mrpl16(-0.24), Ndufa7(-0.25), Mrps11(-0.27), Rars2(-0.27), Mrps2(-0.27), Mrps12(-0.28), Chchd1(-0.28), Mrpl23(-0.29), Mrpl2(-0.29), Ptcd3(-0.29), Gatc(-0…
tRNA aminoacylation for protein translation	3.11496e-08	0.498059	5.89484e-33	1.00759e-30	34	2.09005e-06	1.77268e-07	1.5939e-08	4.35437e-10	7.45827e-08	Lars2(0.02), Cars2(-0.05), Wars2(-0.09), Iars2(-0.09), Eprs(-0.1), Mrpl39(-0.15), Cars(-0.18), Hars(-0.19), Dalrd3(-0.2), Rars(-0.23), Sars2(-0.27), Rars2(-0.27), Mars2(-0.27), Dars2(-0.27), Wars(-0.28), Nars(-0.28), Lars(-0.29), Aimp1(-0.3), Kars(-0.3), Vars2(-0.31), Nars2(-0.31), Tars2(-0.35), Sars(-0.37), Dars(-0.37), Vars(-0.39), Tars(-0.4), Gars(-0.4), Pars2(-0.41), Mars(-0.42), Iars(-0.45),…
O-methyltransferase activity	2.08422e-08	0.336099	6.20938e-33	1.00759e-30	75	1.7978e-05	5.15415e-08	2.12287e-12	2.37851e-06	8.35572e-09	Prdm1(0.57), Prdm11(0.41), Prdm4(0.23), Mettl6(0.15), Mettl10(0.12), Mepce(0.08), Prdm10(0.07), Bmt2(0.06), Prdm5(0.05), Alkbh8(0.04), Ehmt1(0.03), Trmt1l(0.02), Tgs1(-0.01), Prmt9(-0.02), Nsun6(-0.03), Smyd4(-0.04), Ehmt2(-0.08), Setd4(-0.1), 6430573F11Rik(-0.1), Nsun7(-0.12), Nsun4(-0.12), Mettl25(-0.12), Mettl24(-0.13), Trmt2a(-0.14), Mettl21a(-0.15), Mettl17(-0.16), Mettl16(-0.16), Trmt10b(-0…
tRNA methyltransferase activity	2.45841e-08	0.329415	6.26542e-33	1.00759e-30	78	6.13846e-06	1.27814e-07	1.04789e-12	1.5638e-06	3.67937e-08	Prdm1(0.57), Prdm11(0.41), Prdm4(0.23), Mettl6(0.15), Mettl10(0.12), Mepce(0.08), Prdm10(0.07), Bmt2(0.06), Prdm5(0.05), Alkbh8(0.04), Trmt13(0.04), Ehmt1(0.03), Trmt1l(0.02), Tgs1(-0.01), Prmt9(-0.02), Nsun6(-0.03), Smyd4(-0.04), Ehmt2(-0.08), Setd4(-0.1), 6430573F11Rik(-0.1), Nsun7(-0.12), Nsun4(-0.12), Mettl25(-0.12), Mettl24(-0.13), Trmt2a(-0.14), Trdmt1(-0.15), Trdmt1(-0.15), Mettl21a(-0.15)…
protein-arginine N-methyltransferase activity	2.37857e-08	0.326944	7.92694e-33	1.21937e-30	79	1.08292e-05	2.15227e-08	9.92925e-13	4.21933e-06	4.63632e-08	Prdm1(0.57), Prdm11(0.41), Prdm4(0.23), Fbxo11(0.23), Mettl6(0.15), Mettl10(0.12), Mepce(0.08), Prdm10(0.07), Bmt2(0.06), Prdm5(0.05), Alkbh8(0.04), Ehmt1(0.03), Trmt1l(0.02), Prmt2(-0.01), Tgs1(-0.01), Prmt9(-0.02), Nsun6(-0.03), Smyd4(-0.04), Ehmt2(-0.08), Setd4(-0.1), 6430573F11Rik(-0.1), Nsun7(-0.12), Nsun4(-0.12), Mettl25(-0.12), Mettl24(-0.13), Trmt2a(-0.14), Mettl21a(-0.15), Mettl17(-0.16)…
protein C-terminal carboxyl O-methyltransferase activity	2.66095e-08	0.334561	1.26348e-32	1.86258e-30	75	1.7978e-05	3.71007e-08	2.96459e-12	2.37435e-06	1.92475e-08	Prdm1(0.57), Prdm11(0.41), Prdm4(0.23), Mettl6(0.15), Mettl10(0.12), Mepce(0.08), Prdm10(0.07), Bmt2(0.06), Prdm5(0.05), Alkbh8(0.04), Ehmt1(0.03), Trmt1l(0.02), Tgs1(-0.01), Prmt9(-0.02), Nsun6(-0.03), Smyd4(-0.04), Ehmt2(-0.08), Setd4(-0.1), 6430573F11Rik(-0.1), Nsun7(-0.12), Nsun4(-0.12), Mettl25(-0.12), Mettl24(-0.13), Trmt2a(-0.14), Mettl21a(-0.15), Mettl17(-0.16), Mettl16(-0.16), Trmt10b(-0…
tRNA (guanine-N2-)-methyltransferase activity	2.771e-08	0.333228	2.53676e-32	3.59002e-30	75	4.3774e-05	3.70067e-08	2.69544e-12	4.11857e-06	6.7935e-09	Prdm1(0.57), Prdm11(0.41), Prdm4(0.23), Mettl6(0.15), Mettl10(0.12), Mepce(0.08), Prdm10(0.07), Bmt2(0.06), Prdm5(0.05), Alkbh8(0.04), Ehmt1(0.03), Trmt1l(0.02), Tgs1(-0.01), Prmt9(-0.02), Nsun6(-0.03), Smyd4(-0.04), Ehmt2(-0.08), Setd4(-0.1), 6430573F11Rik(-0.1), Nsun7(-0.12), Nsun4(-0.12), Mettl25(-0.12), Mettl24(-0.13), Trmt2a(-0.14), Mettl21a(-0.15), Mettl17(-0.16), Mettl16(-0.16), Trmt10b(-0…
tRNA (adenine-N1-)-methyltransferase activity	2.96918e-08	0.335114	2.93791e-32	3.99782e-30	74	2.97469e-05	4.43758e-08	2.96876e-12	3.62599e-06	1.21618e-08	Prdm1(0.57), Prdm11(0.41), Prdm4(0.23), Mettl6(0.15), Mettl10(0.12), Mepce(0.08), Prdm10(0.07), Bmt2(0.06), Prdm5(0.05), Alkbh8(0.04), Ehmt1(0.03), Trmt1l(0.02), Tgs1(-0.01), Prmt9(-0.02), Nsun6(-0.03), Smyd4(-0.04), Ehmt2(-0.08), Setd4(-0.1), 6430573F11Rik(-0.1), Nsun7(-0.12), Nsun4(-0.12), Mettl25(-0.12), Mettl24(-0.13), Trmt2a(-0.14), Mettl21a(-0.15), Mettl17(-0.16), Mettl16(-0.16), Trmt10b(-0…
tRNA (guanine-N1-)-methyltransferase activity	3.11093e-08	0.334397	4.20632e-32	5.51184e-30	74	2.97469e-05	4.75422e-08	2.96876e-12	4.69345e-06	1.21618e-08	Prdm1(0.57), Prdm11(0.41), Prdm4(0.23), Mettl6(0.15), Mettl10(0.12), Mepce(0.08), Prdm10(0.07), Bmt2(0.06), Prdm5(0.05), Alkbh8(0.04), Ehmt1(0.03), Trmt1l(0.02), Tgs1(-0.01), Prmt9(-0.02), Nsun6(-0.03), Smyd4(-0.04), Ehmt2(-0.08), Setd4(-0.1), 6430573F11Rik(-0.1), Nsun7(-0.12), Nsun4(-0.12), Mettl25(-0.12), Mettl24(-0.13), Trmt2a(-0.14), Mettl21a(-0.15), Mettl17(-0.16), Mettl16(-0.16), Trmt10b(-0…
protein C-terminal leucine carboxyl O-methyltransferase activity	3.85872e-08	0.332905	8.3339e-32	1.00438e-29	74	2.97469e-05	6.3575e-08	5.82141e-12	4.27962e-06	1.21618e-08	Prdm1(0.57), Prdm11(0.41), Prdm4(0.23), Mettl6(0.15), Mettl10(0.12), Mepce(0.08), Prdm10(0.07), Bmt2(0.06), Prdm5(0.05), Alkbh8(0.04), Ehmt1(0.03), Trmt1l(0.02), Tgs1(-0.01), Prmt9(-0.02), Nsun6(-0.03), Smyd4(-0.04), Ehmt2(-0.08), Setd4(-0.1), 6430573F11Rik(-0.1), Nsun7(-0.12), Nsun4(-0.12), Mettl25(-0.12), Mettl24(-0.13), Trmt2a(-0.14), Mettl21a(-0.15), Mettl17(-0.16), Mettl16(-0.16), Trmt10b(-0…
rRNA (adenine-N6,N6-)-dimethyltransferase activity	3.73362e-08	0.332904	8.42007e-32	1.00438e-29	74	3.67502e-05	5.82993e-08	4.18104e-12	4.57646e-06	1.22216e-08	Prdm1(0.57), Prdm11(0.41), Prdm4(0.23), Mettl6(0.15), Mettl10(0.12), Mepce(0.08), Prdm10(0.07), Bmt2(0.06), Prdm5(0.05), Alkbh8(0.04), Ehmt1(0.03), Trmt1l(0.02), Tgs1(-0.01), Prmt9(-0.02), Nsun6(-0.03), Smyd4(-0.04), Ehmt2(-0.08), Setd4(-0.1), 6430573F11Rik(-0.1), Nsun7(-0.12), Nsun4(-0.12), Mettl25(-0.12), Mettl24(-0.13), Trmt2a(-0.14), Mettl21a(-0.15), Mettl17(-0.16), Mettl16(-0.16), Trmt10b(-0…
2-polyprenyl-6-methoxy-1,4-benzoquinone methyltransferase activity	3.53001e-08	0.33294	8.51651e-32	1.00438e-29	74	2.97469e-05	5.85258e-08	4.17785e-12	4.6182e-06	1.62476e-08	Prdm1(0.57), Prdm11(0.41), Prdm4(0.23), Mettl6(0.15), Mettl10(0.12), Mepce(0.08), Prdm10(0.07), Bmt2(0.06), Prdm5(0.05), Alkbh8(0.04), Ehmt1(0.03), Trmt1l(0.02), Tgs1(-0.01), Prmt9(-0.02), Nsun6(-0.03), Smyd4(-0.04), Ehmt2(-0.08), Setd4(-0.1), 6430573F11Rik(-0.1), Nsun7(-0.12), Nsun4(-0.12), Mettl25(-0.12), Mettl24(-0.13), Trmt2a(-0.14), Mettl21a(-0.15), Mettl17(-0.16), Mettl16(-0.16), Trmt10b(-0…
methylarsonite methyltransferase activity	3.92276e-08	0.332208	1.18611e-31	1.35369e-29	74	3.02468e-05	6.19102e-08	4.17785e-12	3.6812e-06	2.81826e-08	Prdm1(0.57), Prdm11(0.41), Prdm4(0.23), Mettl6(0.15), Mettl10(0.12), Mepce(0.08), Prdm10(0.07), Bmt2(0.06), Prdm5(0.05), Alkbh8(0.04), Ehmt1(0.03), Trmt1l(0.02), Tgs1(-0.01), Prmt9(-0.02), Nsun6(-0.03), Smyd4(-0.04), Ehmt2(-0.08), Setd4(-0.1), 6430573F11Rik(-0.1), Nsun7(-0.12), Nsun4(-0.12), Mettl25(-0.12), Mettl24(-0.13), Trmt2a(-0.14), Mettl21a(-0.15), Mettl17(-0.16), Mettl16(-0.16), Trmt10b(-0…
translation initiation factor activity	7.59168e-08	0.353055	6.0334e-31	3.11462e-29	64	0.000156751	2.59098e-08	5.74739e-09	1.42482e-07	2.56407e-09	Eif4e3(0.2), Eif4g3(0.2), Eif3a(0.11), Eif3a(0.11), Eif1(0.08), Denr(0.08), Eif5b(0.07), Eif4g1(0.03), Eif2s3y(-0.03), Eif4h(-0.05), Eif4g2(-0.06), Eif4g2(-0.06), Dhx29(-0.06), Eif3c(-0.08), Eif3c(-0.08), Eif5(-0.08), Eif3j1(-0.09), Eif3j2(-0.09), Mcts1(-0.1), Eif4a1(-0.11), Eif4e(-0.11), Eif4e(-0.11), Mtif2(-0.11), Eif4a2(-0.12), Eif4e2(-0.12), Eif4b(-0.13), Eif1a(-0.15), Eif2a(-0.15), Eif1b(-0.…
C-methyltransferase activity	5.56465e-08	0.330808	6.69053e-31	3.11462e-29	73	4.89353e-05	9.14339e-08	5.81401e-12	6.68495e-06	2.36016e-08	Prdm1(0.57), Prdm11(0.41), Prdm4(0.23), Mettl6(0.15), Mettl10(0.12), Mepce(0.08), Prdm10(0.07), Bmt2(0.06), Prdm5(0.05), Alkbh8(0.04), Ehmt1(0.03), Trmt1l(0.02), Tgs1(-0.01), Prmt9(-0.02), Nsun6(-0.03), Smyd4(-0.04), Ehmt2(-0.08), Setd4(-0.1), 6430573F11Rik(-0.1), Nsun7(-0.12), Nsun4(-0.12), Mettl25(-0.12), Mettl24(-0.13), Trmt2a(-0.14), Mettl21a(-0.15), Mettl17(-0.16), Mettl16(-0.16), Trmt10b(-0…
S-methyltransferase activity	5.56465e-08	0.330808	6.69053e-31	3.11462e-29	73	4.89353e-05	9.14339e-08	5.81401e-12	6.68495e-06	2.36016e-08	Prdm1(0.57), Prdm11(0.41), Prdm4(0.23), Mettl6(0.15), Mettl10(0.12), Mepce(0.08), Prdm10(0.07), Bmt2(0.06), Prdm5(0.05), Alkbh8(0.04), Ehmt1(0.03), Trmt1l(0.02), Tgs1(-0.01), Prmt9(-0.02), Nsun6(-0.03), Smyd4(-0.04), Ehmt2(-0.08), Setd4(-0.1), 6430573F11Rik(-0.1), Nsun7(-0.12), Nsun4(-0.12), Mettl25(-0.12), Mettl24(-0.13), Trmt2a(-0.14), Mettl21a(-0.15), Mettl17(-0.16), Mettl16(-0.16), Trmt10b(-0…
mRNA methyltransferase activity	5.56465e-08	0.330808	6.69053e-31	3.11462e-29	73	4.89353e-05	9.14339e-08	5.81401e-12	6.68495e-06	2.36016e-08	Prdm1(0.57), Prdm11(0.41), Prdm4(0.23), Mettl6(0.15), Mettl10(0.12), Mepce(0.08), Prdm10(0.07), Bmt2(0.06), Prdm5(0.05), Alkbh8(0.04), Ehmt1(0.03), Trmt1l(0.02), Tgs1(-0.01), Prmt9(-0.02), Nsun6(-0.03), Smyd4(-0.04), Ehmt2(-0.08), Setd4(-0.1), 6430573F11Rik(-0.1), Nsun7(-0.12), Nsun4(-0.12), Mettl25(-0.12), Mettl24(-0.13), Trmt2a(-0.14), Mettl21a(-0.15), Mettl17(-0.16), Mettl16(-0.16), Trmt10b(-0…
rRNA methyltransferase activity	5.56465e-08	0.330808	6.69053e-31	3.11462e-29	73	4.89353e-05	9.14339e-08	5.81401e-12	6.68495e-06	2.36016e-08	Prdm1(0.57), Prdm11(0.41), Prdm4(0.23), Mettl6(0.15), Mettl10(0.12), Mepce(0.08), Prdm10(0.07), Bmt2(0.06), Prdm5(0.05), Alkbh8(0.04), Ehmt1(0.03), Trmt1l(0.02), Tgs1(-0.01), Prmt9(-0.02), Nsun6(-0.03), Smyd4(-0.04), Ehmt2(-0.08), Setd4(-0.1), 6430573F11Rik(-0.1), Nsun7(-0.12), Nsun4(-0.12), Mettl25(-0.12), Mettl24(-0.13), Trmt2a(-0.14), Mettl21a(-0.15), Mettl17(-0.16), Mettl16(-0.16), Trmt10b(-0…
rRNA (uridine-2'-O-)-methyltransferase activity	5.56465e-08	0.330808	6.69053e-31	3.11462e-29	73	4.89353e-05	9.14339e-08	5.81401e-12	6.68495e-06	2.36016e-08	Prdm1(0.57), Prdm11(0.41), Prdm4(0.23), Mettl6(0.15), Mettl10(0.12), Mepce(0.08), Prdm10(0.07), Bmt2(0.06), Prdm5(0.05), Alkbh8(0.04), Ehmt1(0.03), Trmt1l(0.02), Tgs1(-0.01), Prmt9(-0.02), Nsun6(-0.03), Smyd4(-0.04), Ehmt2(-0.08), Setd4(-0.1), 6430573F11Rik(-0.1), Nsun7(-0.12), Nsun4(-0.12), Mettl25(-0.12), Mettl24(-0.13), Trmt2a(-0.14), Mettl21a(-0.15), Mettl17(-0.16), Mettl16(-0.16), Trmt10b(-0…
rRNA (adenine-N6-)-methyltransferase activity	5.56465e-08	0.330808	6.69053e-31	3.11462e-29	73	4.89353e-05	9.14339e-08	5.81401e-12	6.68495e-06	2.36016e-08	Prdm1(0.57), Prdm11(0.41), Prdm4(0.23), Mettl6(0.15), Mettl10(0.12), Mepce(0.08), Prdm10(0.07), Bmt2(0.06), Prdm5(0.05), Alkbh8(0.04), Ehmt1(0.03), Trmt1l(0.02), Tgs1(-0.01), Prmt9(-0.02), Nsun6(-0.03), Smyd4(-0.04), Ehmt2(-0.08), Setd4(-0.1), 6430573F11Rik(-0.1), Nsun7(-0.12), Nsun4(-0.12), Mettl25(-0.12), Mettl24(-0.13), Trmt2a(-0.14), Mettl21a(-0.15), Mettl17(-0.16), Mettl16(-0.16), Trmt10b(-0…
rRNA (cytosine-C5-)-methyltransferase activity	5.56465e-08	0.330808	6.69053e-31	3.11462e-29	73	4.89353e-05	9.14339e-08	5.81401e-12	6.68495e-06	2.36016e-08	Prdm1(0.57), Prdm11(0.41), Prdm4(0.23), Mettl6(0.15), Mettl10(0.12), Mepce(0.08), Prdm10(0.07), Bmt2(0.06), Prdm5(0.05), Alkbh8(0.04), Ehmt1(0.03), Trmt1l(0.02), Tgs1(-0.01), Prmt9(-0.02), Nsun6(-0.03), Smyd4(-0.04), Ehmt2(-0.08), Setd4(-0.1), 6430573F11Rik(-0.1), Nsun7(-0.12), Nsun4(-0.12), Mettl25(-0.12), Mettl24(-0.13), Trmt2a(-0.14), Mettl21a(-0.15), Mettl17(-0.16), Mettl16(-0.16), Trmt10b(-0…
selenocysteine methyltransferase activity	5.56465e-08	0.330808	6.69053e-31	3.11462e-29	73	4.89353e-05	9.14339e-08	5.81401e-12	6.68495e-06	2.36016e-08	Prdm1(0.57), Prdm11(0.41), Prdm4(0.23), Mettl6(0.15), Mettl10(0.12), Mepce(0.08), Prdm10(0.07), Bmt2(0.06), Prdm5(0.05), Alkbh8(0.04), Ehmt1(0.03), Trmt1l(0.02), Tgs1(-0.01), Prmt9(-0.02), Nsun6(-0.03), Smyd4(-0.04), Ehmt2(-0.08), Setd4(-0.1), 6430573F11Rik(-0.1), Nsun7(-0.12), Nsun4(-0.12), Mettl25(-0.12), Mettl24(-0.13), Trmt2a(-0.14), Mettl21a(-0.15), Mettl17(-0.16), Mettl16(-0.16), Trmt10b(-0…
arginine N-methyltransferase activity	5.56465e-08	0.330808	6.69053e-31	3.11462e-29	73	4.89353e-05	9.14339e-08	5.81401e-12	6.68495e-06	2.36016e-08	Prdm1(0.57), Prdm11(0.41), Prdm4(0.23), Mettl6(0.15), Mettl10(0.12), Mepce(0.08), Prdm10(0.07), Bmt2(0.06), Prdm5(0.05), Alkbh8(0.04), Ehmt1(0.03), Trmt1l(0.02), Tgs1(-0.01), Prmt9(-0.02), Nsun6(-0.03), Smyd4(-0.04), Ehmt2(-0.08), Setd4(-0.1), 6430573F11Rik(-0.1), Nsun7(-0.12), Nsun4(-0.12), Mettl25(-0.12), Mettl24(-0.13), Trmt2a(-0.14), Mettl21a(-0.15), Mettl17(-0.16), Mettl16(-0.16), Trmt10b(-0…
lysine N-methyltransferase activity	5.56465e-08	0.330808	6.69053e-31	3.11462e-29	73	4.89353e-05	9.14339e-08	5.81401e-12	6.68495e-06	2.36016e-08	Prdm1(0.57), Prdm11(0.41), Prdm4(0.23), Mettl6(0.15), Mettl10(0.12), Mepce(0.08), Prdm10(0.07), Bmt2(0.06), Prdm5(0.05), Alkbh8(0.04), Ehmt1(0.03), Trmt1l(0.02), Tgs1(-0.01), Prmt9(-0.02), Nsun6(-0.03), Smyd4(-0.04), Ehmt2(-0.08), Setd4(-0.1), 6430573F11Rik(-0.1), Nsun7(-0.12), Nsun4(-0.12), Mettl25(-0.12), Mettl24(-0.13), Trmt2a(-0.14), Mettl21a(-0.15), Mettl17(-0.16), Mettl16(-0.16), Trmt10b(-0…
tRNA (adenine) methyltransferase activity	5.56465e-08	0.330808	6.69053e-31	3.11462e-29	73	4.89353e-05	9.14339e-08	5.81401e-12	6.68495e-06	2.36016e-08	Prdm1(0.57), Prdm11(0.41), Prdm4(0.23), Mettl6(0.15), Mettl10(0.12), Mepce(0.08), Prdm10(0.07), Bmt2(0.06), Prdm5(0.05), Alkbh8(0.04), Ehmt1(0.03), Trmt1l(0.02), Tgs1(-0.01), Prmt9(-0.02), Nsun6(-0.03), Smyd4(-0.04), Ehmt2(-0.08), Setd4(-0.1), 6430573F11Rik(-0.1), Nsun7(-0.12), Nsun4(-0.12), Mettl25(-0.12), Mettl24(-0.13), Trmt2a(-0.14), Mettl21a(-0.15), Mettl17(-0.16), Mettl16(-0.16), Trmt10b(-0…
tRNA (cytosine) methyltransferase activity	5.56465e-08	0.330808	6.69053e-31	3.11462e-29	73	4.89353e-05	9.14339e-08	5.81401e-12	6.68495e-06	2.36016e-08	Prdm1(0.57), Prdm11(0.41), Prdm4(0.23), Mettl6(0.15), Mettl10(0.12), Mepce(0.08), Prdm10(0.07), Bmt2(0.06), Prdm5(0.05), Alkbh8(0.04), Ehmt1(0.03), Trmt1l(0.02), Tgs1(-0.01), Prmt9(-0.02), Nsun6(-0.03), Smyd4(-0.04), Ehmt2(-0.08), Setd4(-0.1), 6430573F11Rik(-0.1), Nsun7(-0.12), Nsun4(-0.12), Mettl25(-0.12), Mettl24(-0.13), Trmt2a(-0.14), Mettl21a(-0.15), Mettl17(-0.16), Mettl16(-0.16), Trmt10b(-0…
rRNA (adenine) methyltransferase activity	5.56465e-08	0.330808	6.69053e-31	3.11462e-29	73	4.89353e-05	9.14339e-08	5.81401e-12	6.68495e-06	2.36016e-08	Prdm1(0.57), Prdm11(0.41), Prdm4(0.23), Mettl6(0.15), Mettl10(0.12), Mepce(0.08), Prdm10(0.07), Bmt2(0.06), Prdm5(0.05), Alkbh8(0.04), Ehmt1(0.03), Trmt1l(0.02), Tgs1(-0.01), Prmt9(-0.02), Nsun6(-0.03), Smyd4(-0.04), Ehmt2(-0.08), Setd4(-0.1), 6430573F11Rik(-0.1), Nsun7(-0.12), Nsun4(-0.12), Mettl25(-0.12), Mettl24(-0.13), Trmt2a(-0.14), Mettl21a(-0.15), Mettl17(-0.16), Mettl16(-0.16), Trmt10b(-0…
rRNA (cytosine) methyltransferase activity	5.56465e-08	0.330808	6.69053e-31	3.11462e-29	73	4.89353e-05	9.14339e-08	5.81401e-12	6.68495e-06	2.36016e-08	Prdm1(0.57), Prdm11(0.41), Prdm4(0.23), Mettl6(0.15), Mettl10(0.12), Mepce(0.08), Prdm10(0.07), Bmt2(0.06), Prdm5(0.05), Alkbh8(0.04), Ehmt1(0.03), Trmt1l(0.02), Tgs1(-0.01), Prmt9(-0.02), Nsun6(-0.03), Smyd4(-0.04), Ehmt2(-0.08), Setd4(-0.1), 6430573F11Rik(-0.1), Nsun7(-0.12), Nsun4(-0.12), Mettl25(-0.12), Mettl24(-0.13), Trmt2a(-0.14), Mettl21a(-0.15), Mettl17(-0.16), Mettl16(-0.16), Trmt10b(-0…
rRNA (guanine) methyltransferase activity	5.56465e-08	0.330808	6.69053e-31	3.11462e-29	73	4.89353e-05	9.14339e-08	5.81401e-12	6.68495e-06	2.36016e-08	Prdm1(0.57), Prdm11(0.41), Prdm4(0.23), Mettl6(0.15), Mettl10(0.12), Mepce(0.08), Prdm10(0.07), Bmt2(0.06), Prdm5(0.05), Alkbh8(0.04), Ehmt1(0.03), Trmt1l(0.02), Tgs1(-0.01), Prmt9(-0.02), Nsun6(-0.03), Smyd4(-0.04), Ehmt2(-0.08), Setd4(-0.1), 6430573F11Rik(-0.1), Nsun7(-0.12), Nsun4(-0.12), Mettl25(-0.12), Mettl24(-0.13), Trmt2a(-0.14), Mettl21a(-0.15), Mettl17(-0.16), Mettl16(-0.16), Trmt10b(-0…
rRNA (uridine) methyltransferase activity	5.56465e-08	0.330808	6.69053e-31	3.11462e-29	73	4.89353e-05	9.14339e-08	5.81401e-12	6.68495e-06	2.36016e-08	Prdm1(0.57), Prdm11(0.41), Prdm4(0.23), Mettl6(0.15), Mettl10(0.12), Mepce(0.08), Prdm10(0.07), Bmt2(0.06), Prdm5(0.05), Alkbh8(0.04), Ehmt1(0.03), Trmt1l(0.02), Tgs1(-0.01), Prmt9(-0.02), Nsun6(-0.03), Smyd4(-0.04), Ehmt2(-0.08), Setd4(-0.1), 6430573F11Rik(-0.1), Nsun7(-0.12), Nsun4(-0.12), Mettl25(-0.12), Mettl24(-0.13), Trmt2a(-0.14), Mettl21a(-0.15), Mettl17(-0.16), Mettl16(-0.16), Trmt10b(-0…
1-phenanthrol methyltransferase activity	5.56465e-08	0.330808	6.69053e-31	3.11462e-29	73	4.89353e-05	9.14339e-08	5.81401e-12	6.68495e-06	2.36016e-08	Prdm1(0.57), Prdm11(0.41), Prdm4(0.23), Mettl6(0.15), Mettl10(0.12), Mepce(0.08), Prdm10(0.07), Bmt2(0.06), Prdm5(0.05), Alkbh8(0.04), Ehmt1(0.03), Trmt1l(0.02), Tgs1(-0.01), Prmt9(-0.02), Nsun6(-0.03), Smyd4(-0.04), Ehmt2(-0.08), Setd4(-0.1), 6430573F11Rik(-0.1), Nsun7(-0.12), Nsun4(-0.12), Mettl25(-0.12), Mettl24(-0.13), Trmt2a(-0.14), Mettl21a(-0.15), Mettl17(-0.16), Mettl16(-0.16), Trmt10b(-0…
protein-arginine N5-methyltransferase activity	5.56465e-08	0.330808	6.69053e-31	3.11462e-29	73	4.89353e-05	9.14339e-08	5.81401e-12	6.68495e-06	2.36016e-08	Prdm1(0.57), Prdm11(0.41), Prdm4(0.23), Mettl6(0.15), Mettl10(0.12), Mepce(0.08), Prdm10(0.07), Bmt2(0.06), Prdm5(0.05), Alkbh8(0.04), Ehmt1(0.03), Trmt1l(0.02), Tgs1(-0.01), Prmt9(-0.02), Nsun6(-0.03), Smyd4(-0.04), Ehmt2(-0.08), Setd4(-0.1), 6430573F11Rik(-0.1), Nsun7(-0.12), Nsun4(-0.12), Mettl25(-0.12), Mettl24(-0.13), Trmt2a(-0.14), Mettl21a(-0.15), Mettl17(-0.16), Mettl16(-0.16), Trmt10b(-0…
dimethylarsinite methyltransferase activity	5.56465e-08	0.330808	6.69053e-31	3.11462e-29	73	4.89353e-05	9.14339e-08	5.81401e-12	6.68495e-06	2.36016e-08	Prdm1(0.57), Prdm11(0.41), Prdm4(0.23), Mettl6(0.15), Mettl10(0.12), Mepce(0.08), Prdm10(0.07), Bmt2(0.06), Prdm5(0.05), Alkbh8(0.04), Ehmt1(0.03), Trmt1l(0.02), Tgs1(-0.01), Prmt9(-0.02), Nsun6(-0.03), Smyd4(-0.04), Ehmt2(-0.08), Setd4(-0.1), 6430573F11Rik(-0.1), Nsun7(-0.12), Nsun4(-0.12), Mettl25(-0.12), Mettl24(-0.13), Trmt2a(-0.14), Mettl21a(-0.15), Mettl17(-0.16), Mettl16(-0.16), Trmt10b(-0…
4,5-dihydroxybenzo(a)pyrene methyltransferase activity	5.56465e-08	0.330808	6.69053e-31	3.11462e-29	73	4.89353e-05	9.14339e-08	5.81401e-12	6.68495e-06	2.36016e-08	Prdm1(0.57), Prdm11(0.41), Prdm4(0.23), Mettl6(0.15), Mettl10(0.12), Mepce(0.08), Prdm10(0.07), Bmt2(0.06), Prdm5(0.05), Alkbh8(0.04), Ehmt1(0.03), Trmt1l(0.02), Tgs1(-0.01), Prmt9(-0.02), Nsun6(-0.03), Smyd4(-0.04), Ehmt2(-0.08), Setd4(-0.1), 6430573F11Rik(-0.1), Nsun7(-0.12), Nsun4(-0.12), Mettl25(-0.12), Mettl24(-0.13), Trmt2a(-0.14), Mettl21a(-0.15), Mettl17(-0.16), Mettl16(-0.16), Trmt10b(-0…
1-hydroxypyrene methyltransferase activity	5.56465e-08	0.330808	6.69053e-31	3.11462e-29	73	4.89353e-05	9.14339e-08	5.81401e-12	6.68495e-06	2.36016e-08	Prdm1(0.57), Prdm11(0.41), Prdm4(0.23), Mettl6(0.15), Mettl10(0.12), Mepce(0.08), Prdm10(0.07), Bmt2(0.06), Prdm5(0.05), Alkbh8(0.04), Ehmt1(0.03), Trmt1l(0.02), Tgs1(-0.01), Prmt9(-0.02), Nsun6(-0.03), Smyd4(-0.04), Ehmt2(-0.08), Setd4(-0.1), 6430573F11Rik(-0.1), Nsun7(-0.12), Nsun4(-0.12), Mettl25(-0.12), Mettl24(-0.13), Trmt2a(-0.14), Mettl21a(-0.15), Mettl17(-0.16), Mettl16(-0.16), Trmt10b(-0…
1-hydroxy-6-methoxypyrene methyltransferase activity	5.56465e-08	0.330808	6.69053e-31	3.11462e-29	73	4.89353e-05	9.14339e-08	5.81401e-12	6.68495e-06	2.36016e-08	Prdm1(0.57), Prdm11(0.41), Prdm4(0.23), Mettl6(0.15), Mettl10(0.12), Mepce(0.08), Prdm10(0.07), Bmt2(0.06), Prdm5(0.05), Alkbh8(0.04), Ehmt1(0.03), Trmt1l(0.02), Tgs1(-0.01), Prmt9(-0.02), Nsun6(-0.03), Smyd4(-0.04), Ehmt2(-0.08), Setd4(-0.1), 6430573F11Rik(-0.1), Nsun7(-0.12), Nsun4(-0.12), Mettl25(-0.12), Mettl24(-0.13), Trmt2a(-0.14), Mettl21a(-0.15), Mettl17(-0.16), Mettl16(-0.16), Trmt10b(-0…
demethylmenaquinone methyltransferase activity	5.56465e-08	0.330808	6.69053e-31	3.11462e-29	73	4.89353e-05	9.14339e-08	5.81401e-12	6.68495e-06	2.36016e-08	Prdm1(0.57), Prdm11(0.41), Prdm4(0.23), Mettl6(0.15), Mettl10(0.12), Mepce(0.08), Prdm10(0.07), Bmt2(0.06), Prdm5(0.05), Alkbh8(0.04), Ehmt1(0.03), Trmt1l(0.02), Tgs1(-0.01), Prmt9(-0.02), Nsun6(-0.03), Smyd4(-0.04), Ehmt2(-0.08), Setd4(-0.1), 6430573F11Rik(-0.1), Nsun7(-0.12), Nsun4(-0.12), Mettl25(-0.12), Mettl24(-0.13), Trmt2a(-0.14), Mettl21a(-0.15), Mettl17(-0.16), Mettl16(-0.16), Trmt10b(-0…
cobalt-precorrin-6B C5-methyltransferase activity	5.56465e-08	0.330808	6.69053e-31	3.11462e-29	73	4.89353e-05	9.14339e-08	5.81401e-12	6.68495e-06	2.36016e-08	Prdm1(0.57), Prdm11(0.41), Prdm4(0.23), Mettl6(0.15), Mettl10(0.12), Mepce(0.08), Prdm10(0.07), Bmt2(0.06), Prdm5(0.05), Alkbh8(0.04), Ehmt1(0.03), Trmt1l(0.02), Tgs1(-0.01), Prmt9(-0.02), Nsun6(-0.03), Smyd4(-0.04), Ehmt2(-0.08), Setd4(-0.1), 6430573F11Rik(-0.1), Nsun7(-0.12), Nsun4(-0.12), Mettl25(-0.12), Mettl24(-0.13), Trmt2a(-0.14), Mettl21a(-0.15), Mettl17(-0.16), Mettl16(-0.16), Trmt10b(-0…
cobalt-precorrin-7 C15-methyltransferase activity	5.56465e-08	0.330808	6.69053e-31	3.11462e-29	73	4.89353e-05	9.14339e-08	5.81401e-12	6.68495e-06	2.36016e-08	Prdm1(0.57), Prdm11(0.41), Prdm4(0.23), Mettl6(0.15), Mettl10(0.12), Mepce(0.08), Prdm10(0.07), Bmt2(0.06), Prdm5(0.05), Alkbh8(0.04), Ehmt1(0.03), Trmt1l(0.02), Tgs1(-0.01), Prmt9(-0.02), Nsun6(-0.03), Smyd4(-0.04), Ehmt2(-0.08), Setd4(-0.1), 6430573F11Rik(-0.1), Nsun7(-0.12), Nsun4(-0.12), Mettl25(-0.12), Mettl24(-0.13), Trmt2a(-0.14), Mettl21a(-0.15), Mettl17(-0.16), Mettl16(-0.16), Trmt10b(-0…
cobalt-precorrin-5B C1-methyltransferase activity	5.56465e-08	0.330808	6.69053e-31	3.11462e-29	73	4.89353e-05	9.14339e-08	5.81401e-12	6.68495e-06	2.36016e-08	Prdm1(0.57), Prdm11(0.41), Prdm4(0.23), Mettl6(0.15), Mettl10(0.12), Mepce(0.08), Prdm10(0.07), Bmt2(0.06), Prdm5(0.05), Alkbh8(0.04), Ehmt1(0.03), Trmt1l(0.02), Tgs1(-0.01), Prmt9(-0.02), Nsun6(-0.03), Smyd4(-0.04), Ehmt2(-0.08), Setd4(-0.1), 6430573F11Rik(-0.1), Nsun7(-0.12), Nsun4(-0.12), Mettl25(-0.12), Mettl24(-0.13), Trmt2a(-0.14), Mettl21a(-0.15), Mettl17(-0.16), Mettl16(-0.16), Trmt10b(-0…
cobalt-precorrin-3 C17-methyltransferase activity	5.56465e-08	0.330808	6.69053e-31	3.11462e-29	73	4.89353e-05	9.14339e-08	5.81401e-12	6.68495e-06	2.36016e-08	Prdm1(0.57), Prdm11(0.41), Prdm4(0.23), Mettl6(0.15), Mettl10(0.12), Mepce(0.08), Prdm10(0.07), Bmt2(0.06), Prdm5(0.05), Alkbh8(0.04), Ehmt1(0.03), Trmt1l(0.02), Tgs1(-0.01), Prmt9(-0.02), Nsun6(-0.03), Smyd4(-0.04), Ehmt2(-0.08), Setd4(-0.1), 6430573F11Rik(-0.1), Nsun7(-0.12), Nsun4(-0.12), Mettl25(-0.12), Mettl24(-0.13), Trmt2a(-0.14), Mettl21a(-0.15), Mettl17(-0.16), Mettl16(-0.16), Trmt10b(-0…
dimethylamine methyltransferase activity	5.56465e-08	0.330808	6.69053e-31	3.11462e-29	73	4.89353e-05	9.14339e-08	5.81401e-12	6.68495e-06	2.36016e-08	Prdm1(0.57), Prdm11(0.41), Prdm4(0.23), Mettl6(0.15), Mettl10(0.12), Mepce(0.08), Prdm10(0.07), Bmt2(0.06), Prdm5(0.05), Alkbh8(0.04), Ehmt1(0.03), Trmt1l(0.02), Tgs1(-0.01), Prmt9(-0.02), Nsun6(-0.03), Smyd4(-0.04), Ehmt2(-0.08), Setd4(-0.1), 6430573F11Rik(-0.1), Nsun7(-0.12), Nsun4(-0.12), Mettl25(-0.12), Mettl24(-0.13), Trmt2a(-0.14), Mettl21a(-0.15), Mettl17(-0.16), Mettl16(-0.16), Trmt10b(-0…
hydroxyneurosporene-O-methyltransferase activity	5.56465e-08	0.330808	6.69053e-31	3.11462e-29	73	4.89353e-05	9.14339e-08	5.81401e-12	6.68495e-06	2.36016e-08	Prdm1(0.57), Prdm11(0.41), Prdm4(0.23), Mettl6(0.15), Mettl10(0.12), Mepce(0.08), Prdm10(0.07), Bmt2(0.06), Prdm5(0.05), Alkbh8(0.04), Ehmt1(0.03), Trmt1l(0.02), Tgs1(-0.01), Prmt9(-0.02), Nsun6(-0.03), Smyd4(-0.04), Ehmt2(-0.08), Setd4(-0.1), 6430573F11Rik(-0.1), Nsun7(-0.12), Nsun4(-0.12), Mettl25(-0.12), Mettl24(-0.13), Trmt2a(-0.14), Mettl21a(-0.15), Mettl17(-0.16), Mettl16(-0.16), Trmt10b(-0…
tRNA (adenine-57, 58-N(1)-) methyltransferase activity	5.56465e-08	0.330808	6.69053e-31	3.11462e-29	73	4.89353e-05	9.14339e-08	5.81401e-12	6.68495e-06	2.36016e-08	Prdm1(0.57), Prdm11(0.41), Prdm4(0.23), Mettl6(0.15), Mettl10(0.12), Mepce(0.08), Prdm10(0.07), Bmt2(0.06), Prdm5(0.05), Alkbh8(0.04), Ehmt1(0.03), Trmt1l(0.02), Tgs1(-0.01), Prmt9(-0.02), Nsun6(-0.03), Smyd4(-0.04), Ehmt2(-0.08), Setd4(-0.1), 6430573F11Rik(-0.1), Nsun7(-0.12), Nsun4(-0.12), Mettl25(-0.12), Mettl24(-0.13), Trmt2a(-0.14), Mettl21a(-0.15), Mettl17(-0.16), Mettl16(-0.16), Trmt10b(-0…
methylamine-specific methylcobalamin:coenzyme M methyltransferase activity	5.56465e-08	0.330808	6.69053e-31	3.11462e-29	73	4.89353e-05	9.14339e-08	5.81401e-12	6.68495e-06	2.36016e-08	Prdm1(0.57), Prdm11(0.41), Prdm4(0.23), Mettl6(0.15), Mettl10(0.12), Mepce(0.08), Prdm10(0.07), Bmt2(0.06), Prdm5(0.05), Alkbh8(0.04), Ehmt1(0.03), Trmt1l(0.02), Tgs1(-0.01), Prmt9(-0.02), Nsun6(-0.03), Smyd4(-0.04), Ehmt2(-0.08), Setd4(-0.1), 6430573F11Rik(-0.1), Nsun7(-0.12), Nsun4(-0.12), Mettl25(-0.12), Mettl24(-0.13), Trmt2a(-0.14), Mettl21a(-0.15), Mettl17(-0.16), Mettl16(-0.16), Trmt10b(-0…
trimethylamine methyltransferase activity	5.56465e-08	0.330808	6.69053e-31	3.11462e-29	73	4.89353e-05	9.14339e-08	5.81401e-12	6.68495e-06	2.36016e-08	Prdm1(0.57), Prdm11(0.41), Prdm4(0.23), Mettl6(0.15), Mettl10(0.12), Mepce(0.08), Prdm10(0.07), Bmt2(0.06), Prdm5(0.05), Alkbh8(0.04), Ehmt1(0.03), Trmt1l(0.02), Tgs1(-0.01), Prmt9(-0.02), Nsun6(-0.03), Smyd4(-0.04), Ehmt2(-0.08), Setd4(-0.1), 6430573F11Rik(-0.1), Nsun7(-0.12), Nsun4(-0.12), Mettl25(-0.12), Mettl24(-0.13), Trmt2a(-0.14), Mettl21a(-0.15), Mettl17(-0.16), Mettl16(-0.16), Trmt10b(-0…
methanol-specific methylcobalamin:coenzyme M methyltransferase activity	5.56465e-08	0.330808	6.69053e-31	3.11462e-29	73	4.89353e-05	9.14339e-08	5.81401e-12	6.68495e-06	2.36016e-08	Prdm1(0.57), Prdm11(0.41), Prdm4(0.23), Mettl6(0.15), Mettl10(0.12), Mepce(0.08), Prdm10(0.07), Bmt2(0.06), Prdm5(0.05), Alkbh8(0.04), Ehmt1(0.03), Trmt1l(0.02), Tgs1(-0.01), Prmt9(-0.02), Nsun6(-0.03), Smyd4(-0.04), Ehmt2(-0.08), Setd4(-0.1), 6430573F11Rik(-0.1), Nsun7(-0.12), Nsun4(-0.12), Mettl25(-0.12), Mettl24(-0.13), Trmt2a(-0.14), Mettl21a(-0.15), Mettl17(-0.16), Mettl16(-0.16), Trmt10b(-0…
monomethylamine methyltransferase activity	5.56465e-08	0.330808	6.69053e-31	3.11462e-29	73	4.89353e-05	9.14339e-08	5.81401e-12	6.68495e-06	2.36016e-08	Prdm1(0.57), Prdm11(0.41), Prdm4(0.23), Mettl6(0.15), Mettl10(0.12), Mepce(0.08), Prdm10(0.07), Bmt2(0.06), Prdm5(0.05), Alkbh8(0.04), Ehmt1(0.03), Trmt1l(0.02), Tgs1(-0.01), Prmt9(-0.02), Nsun6(-0.03), Smyd4(-0.04), Ehmt2(-0.08), Setd4(-0.1), 6430573F11Rik(-0.1), Nsun7(-0.12), Nsun4(-0.12), Mettl25(-0.12), Mettl24(-0.13), Trmt2a(-0.14), Mettl21a(-0.15), Mettl17(-0.16), Mettl16(-0.16), Trmt10b(-0…
P-methyltransferase activity	5.56465e-08	0.330808	6.69053e-31	3.11462e-29	73	4.89353e-05	9.14339e-08	5.81401e-12	6.68495e-06	2.36016e-08	Prdm1(0.57), Prdm11(0.41), Prdm4(0.23), Mettl6(0.15), Mettl10(0.12), Mepce(0.08), Prdm10(0.07), Bmt2(0.06), Prdm5(0.05), Alkbh8(0.04), Ehmt1(0.03), Trmt1l(0.02), Tgs1(-0.01), Prmt9(-0.02), Nsun6(-0.03), Smyd4(-0.04), Ehmt2(-0.08), Setd4(-0.1), 6430573F11Rik(-0.1), Nsun7(-0.12), Nsun4(-0.12), Mettl25(-0.12), Mettl24(-0.13), Trmt2a(-0.14), Mettl21a(-0.15), Mettl17(-0.16), Mettl16(-0.16), Trmt10b(-0…
Se-methyltransferase activity	5.56465e-08	0.330808	6.69053e-31	3.11462e-29	73	4.89353e-05	9.14339e-08	5.81401e-12	6.68495e-06	2.36016e-08	Prdm1(0.57), Prdm11(0.41), Prdm4(0.23), Mettl6(0.15), Mettl10(0.12), Mepce(0.08), Prdm10(0.07), Bmt2(0.06), Prdm5(0.05), Alkbh8(0.04), Ehmt1(0.03), Trmt1l(0.02), Tgs1(-0.01), Prmt9(-0.02), Nsun6(-0.03), Smyd4(-0.04), Ehmt2(-0.08), Setd4(-0.1), 6430573F11Rik(-0.1), Nsun7(-0.12), Nsun4(-0.12), Mettl25(-0.12), Mettl24(-0.13), Trmt2a(-0.14), Mettl21a(-0.15), Mettl17(-0.16), Mettl16(-0.16), Trmt10b(-0…
2-phytyl-1,4-naphthoquinone methyltransferase activity	5.56465e-08	0.330808	6.69053e-31	3.11462e-29	73	4.89353e-05	9.14339e-08	5.81401e-12	6.68495e-06	2.36016e-08	Prdm1(0.57), Prdm11(0.41), Prdm4(0.23), Mettl6(0.15), Mettl10(0.12), Mepce(0.08), Prdm10(0.07), Bmt2(0.06), Prdm5(0.05), Alkbh8(0.04), Ehmt1(0.03), Trmt1l(0.02), Tgs1(-0.01), Prmt9(-0.02), Nsun6(-0.03), Smyd4(-0.04), Ehmt2(-0.08), Setd4(-0.1), 6430573F11Rik(-0.1), Nsun7(-0.12), Nsun4(-0.12), Mettl25(-0.12), Mettl24(-0.13), Trmt2a(-0.14), Mettl21a(-0.15), Mettl17(-0.16), Mettl16(-0.16), Trmt10b(-0…
tRNA (uracil-2'-O-)-methyltransferase activity	5.56465e-08	0.330808	6.69053e-31	3.11462e-29	73	4.89353e-05	9.14339e-08	5.81401e-12	6.68495e-06	2.36016e-08	Prdm1(0.57), Prdm11(0.41), Prdm4(0.23), Mettl6(0.15), Mettl10(0.12), Mepce(0.08), Prdm10(0.07), Bmt2(0.06), Prdm5(0.05), Alkbh8(0.04), Ehmt1(0.03), Trmt1l(0.02), Tgs1(-0.01), Prmt9(-0.02), Nsun6(-0.03), Smyd4(-0.04), Ehmt2(-0.08), Setd4(-0.1), 6430573F11Rik(-0.1), Nsun7(-0.12), Nsun4(-0.12), Mettl25(-0.12), Mettl24(-0.13), Trmt2a(-0.14), Mettl21a(-0.15), Mettl17(-0.16), Mettl16(-0.16), Trmt10b(-0…
tRNA (cytosine-2'-O-)-methyltransferase activity	5.56465e-08	0.330808	6.69053e-31	3.11462e-29	73	4.89353e-05	9.14339e-08	5.81401e-12	6.68495e-06	2.36016e-08	Prdm1(0.57), Prdm11(0.41), Prdm4(0.23), Mettl6(0.15), Mettl10(0.12), Mepce(0.08), Prdm10(0.07), Bmt2(0.06), Prdm5(0.05), Alkbh8(0.04), Ehmt1(0.03), Trmt1l(0.02), Tgs1(-0.01), Prmt9(-0.02), Nsun6(-0.03), Smyd4(-0.04), Ehmt2(-0.08), Setd4(-0.1), 6430573F11Rik(-0.1), Nsun7(-0.12), Nsun4(-0.12), Mettl25(-0.12), Mettl24(-0.13), Trmt2a(-0.14), Mettl21a(-0.15), Mettl17(-0.16), Mettl16(-0.16), Trmt10b(-0…
phosphomethylethanolamine N-methyltransferase activity	5.56465e-08	0.330808	6.69053e-31	3.11462e-29	73	4.89353e-05	9.14339e-08	5.81401e-12	6.68495e-06	2.36016e-08	Prdm1(0.57), Prdm11(0.41), Prdm4(0.23), Mettl6(0.15), Mettl10(0.12), Mepce(0.08), Prdm10(0.07), Bmt2(0.06), Prdm5(0.05), Alkbh8(0.04), Ehmt1(0.03), Trmt1l(0.02), Tgs1(-0.01), Prmt9(-0.02), Nsun6(-0.03), Smyd4(-0.04), Ehmt2(-0.08), Setd4(-0.1), 6430573F11Rik(-0.1), Nsun7(-0.12), Nsun4(-0.12), Mettl25(-0.12), Mettl24(-0.13), Trmt2a(-0.14), Mettl21a(-0.15), Mettl17(-0.16), Mettl16(-0.16), Trmt10b(-0…
tRNA (cytosine-3-)-methyltransferase activity	5.56465e-08	0.330808	6.69053e-31	3.11462e-29	73	4.89353e-05	9.14339e-08	5.81401e-12	6.68495e-06	2.36016e-08	Prdm1(0.57), Prdm11(0.41), Prdm4(0.23), Mettl6(0.15), Mettl10(0.12), Mepce(0.08), Prdm10(0.07), Bmt2(0.06), Prdm5(0.05), Alkbh8(0.04), Ehmt1(0.03), Trmt1l(0.02), Tgs1(-0.01), Prmt9(-0.02), Nsun6(-0.03), Smyd4(-0.04), Ehmt2(-0.08), Setd4(-0.1), 6430573F11Rik(-0.1), Nsun7(-0.12), Nsun4(-0.12), Mettl25(-0.12), Mettl24(-0.13), Trmt2a(-0.14), Mettl21a(-0.15), Mettl17(-0.16), Mettl16(-0.16), Trmt10b(-0…
rRNA (cytosine-2'-O-)-methyltransferase activity	5.56465e-08	0.330808	6.69053e-31	3.11462e-29	73	4.89353e-05	9.14339e-08	5.81401e-12	6.68495e-06	2.36016e-08	Prdm1(0.57), Prdm11(0.41), Prdm4(0.23), Mettl6(0.15), Mettl10(0.12), Mepce(0.08), Prdm10(0.07), Bmt2(0.06), Prdm5(0.05), Alkbh8(0.04), Ehmt1(0.03), Trmt1l(0.02), Tgs1(-0.01), Prmt9(-0.02), Nsun6(-0.03), Smyd4(-0.04), Ehmt2(-0.08), Setd4(-0.1), 6430573F11Rik(-0.1), Nsun7(-0.12), Nsun4(-0.12), Mettl25(-0.12), Mettl24(-0.13), Trmt2a(-0.14), Mettl21a(-0.15), Mettl17(-0.16), Mettl16(-0.16), Trmt10b(-0…
rRNA (cytosine-N4-)-methyltransferase activity	5.56465e-08	0.330808	6.69053e-31	3.11462e-29	73	4.89353e-05	9.14339e-08	5.81401e-12	6.68495e-06	2.36016e-08	Prdm1(0.57), Prdm11(0.41), Prdm4(0.23), Mettl6(0.15), Mettl10(0.12), Mepce(0.08), Prdm10(0.07), Bmt2(0.06), Prdm5(0.05), Alkbh8(0.04), Ehmt1(0.03), Trmt1l(0.02), Tgs1(-0.01), Prmt9(-0.02), Nsun6(-0.03), Smyd4(-0.04), Ehmt2(-0.08), Setd4(-0.1), 6430573F11Rik(-0.1), Nsun7(-0.12), Nsun4(-0.12), Mettl25(-0.12), Mettl24(-0.13), Trmt2a(-0.14), Mettl21a(-0.15), Mettl17(-0.16), Mettl16(-0.16), Trmt10b(-0…
trihydroxyferuloyl spermidine O-methyltransferase activity	5.56465e-08	0.330808	6.69053e-31	3.11462e-29	73	4.89353e-05	9.14339e-08	5.81401e-12	6.68495e-06	2.36016e-08	Prdm1(0.57), Prdm11(0.41), Prdm4(0.23), Mettl6(0.15), Mettl10(0.12), Mepce(0.08), Prdm10(0.07), Bmt2(0.06), Prdm5(0.05), Alkbh8(0.04), Ehmt1(0.03), Trmt1l(0.02), Tgs1(-0.01), Prmt9(-0.02), Nsun6(-0.03), Smyd4(-0.04), Ehmt2(-0.08), Setd4(-0.1), 6430573F11Rik(-0.1), Nsun7(-0.12), Nsun4(-0.12), Mettl25(-0.12), Mettl24(-0.13), Trmt2a(-0.14), Mettl21a(-0.15), Mettl17(-0.16), Mettl16(-0.16), Trmt10b(-0…
small ribosomal subunit	4.55562e-08	0.564487	7.35921e-31	3.38142e-29	25	3.64376e-08	1.98416e-10	2.78064e-06	6.8671e-07	1.41222e-06	Rps27a(-0.08), Rps6(-0.14), Dap3(-0.14), Rps23(-0.24), Rps25(-0.25), Rps18(-0.26), Rps18(-0.26), Rps21(-0.26), Rps2(-0.27), Mrps2(-0.27), Rps24(-0.28), Mrps12(-0.28), Rps20(-0.29), Rps3(-0.32), Rps9(-0.33), Rps4x(-0.37), Rps5(-0.37), Rps29(-0.39), Rack1(-0.42), Rps15(-0.44), Rps26(-0.45), Npm1(-0.47), Rps28(-0.54), Rps16(-0.74), Rpsa(-0.78),
N-methyltransferase activity	6.56831e-08	0.324508	1.64882e-30	7.47889e-29	75	5.21964e-05	1.39316e-07	1.12499e-11	1.46696e-05	7.90648e-09	Prdm1(0.57), Prdm11(0.41), Prdm4(0.23), Mettl6(0.15), Mettl10(0.12), Mepce(0.08), Prdm10(0.07), Bmt2(0.06), Prdm5(0.05), Hnmt(0.05), Alkbh8(0.04), Ehmt1(0.03), Trmt1l(0.02), Tgs1(-0.01), Prmt9(-0.02), Nsun6(-0.03), Smyd4(-0.04), Ehmt2(-0.08), Setd4(-0.1), 6430573F11Rik(-0.1), Nsun7(-0.12), Nsun4(-0.12), Mettl25(-0.12), Mettl24(-0.13), Trmt2a(-0.14), Mettl21a(-0.15), Mettl17(-0.16), Mettl16(-0.16)…
RNA methyltransferase activity	6.6547e-08	0.324428	1.70343e-30	7.62878e-29	75	6.2265e-05	1.81425e-07	3.7759e-12	6.53743e-06	3.31635e-08	Prdm1(0.57), Prdm11(0.41), Prdm4(0.23), Mettl6(0.15), Mettl10(0.12), Mepce(0.08), Prdm10(0.07), Bmt2(0.06), Prdm5(0.05), Alkbh8(0.04), Ehmt1(0.03), Trmt1l(0.02), Tgs1(-0.01), Prmt9(-0.02), Nsun6(-0.03), Smyd4(-0.04), Mettl3(-0.07), Ehmt2(-0.08), Trmt2b(-0.08), Setd4(-0.1), 6430573F11Rik(-0.1), Nsun7(-0.12), Nsun4(-0.12), Mettl25(-0.12), Mettl24(-0.13), Trmt2a(-0.14), Mettl21a(-0.15), Mettl17(-0.1…
mitochondrial respiratory chain complex I	1.61941e-08	0.417874	3.29184e-30	1.45582e-28	52	0.000774334	4.11858e-06	3.15804e-07	8.03526e-11	7.65922e-11	ND1(0.06), Ndufa1(0.04), Ndufa5(-0.03), Ndufc1(-0.04), Ndufa6(-0.04), Ndufb11(-0.04), Ndufs1(-0.04), Ndufs1(-0.04), Ndufs2(-0.06), Ndufv1(-0.08), Ndufa3(-0.09), Ndufa9(-0.09), Ndufa9(-0.09), Ndufb9(-0.09), Ndufb9(-0.09), Ndufc2(-0.09), Ndufab1(-0.09), Ndufb6(-0.09), Ndufs6(-0.09), Ndufs6(-0.09), Ndufs4(-0.1), Ndufs4(-0.1), Ndufb5(-0.1), Ndufs3(-0.11), Ndufs3(-0.11), Ndufa2(-0.12), Ndufa2(-0.12), …
protein-lysine N-methyltransferase activity	1.0192e-07	0.317055	7.13944e-30	3.11844e-28	77	6.67958e-05	1.62925e-07	1.88594e-11	7.8178e-06	3.50199e-08	Prdm1(0.57), Prdm11(0.41), Setd7(0.35), Prdm4(0.23), Mettl6(0.15), Ezh2(0.12), Mettl10(0.12), Mepce(0.08), Prdm10(0.07), Bmt2(0.06), Prdm5(0.05), Alkbh8(0.04), Ehmt1(0.03), Trmt1l(0.02), Tgs1(-0.01), Prmt9(-0.02), Nsun6(-0.03), Smyd4(-0.04), Ehmt2(-0.08), Setd4(-0.1), 6430573F11Rik(-0.1), Nsun7(-0.12), Nsun4(-0.12), Mettl25(-0.12), Mettl24(-0.13), Trmt2a(-0.14), Mettl21a(-0.15), Mettl17(-0.16), M…
tRNA (uracil) methyltransferase activity	8.53303e-08	0.321362	7.40722e-30	3.19594e-28	75	7.60716e-05	3.02426e-07	5.82395e-12	1.15446e-05	2.52838e-08	Prdm1(0.57), Prdm11(0.41), Prdm4(0.23), Mettl6(0.15), Mettl10(0.12), Mepce(0.08), Prdm10(0.07), Bmt2(0.06), Prdm5(0.05), Alkbh8(0.04), Alkbh8(0.04), Ehmt1(0.03), Trmt1l(0.02), Tgs1(-0.01), Trmt44(-0.02), Prmt9(-0.02), Nsun6(-0.03), Smyd4(-0.04), Ehmt2(-0.08), Setd4(-0.1), 6430573F11Rik(-0.1), Nsun7(-0.12), Nsun4(-0.12), Mettl25(-0.12), Mettl24(-0.13), Trmt2a(-0.14), Mettl21a(-0.15), Mettl17(-0.16…
tRNA binding	1.43764e-07	0.38625	2.26968e-29	9.67484e-28	51	0.00042564	5.51963e-08	2.49453e-08	2.56117e-08	2.13035e-08	Eif2ak4(0.17), Aarsd1(0.07), Tyw5(0.06), Alkbh8(0.04), Alkbh8(0.04), Trmt1l(0.02), Ptcd1(-0.02), Nsun6(-0.03), Ighmbp2(-0.07), Iars2(-0.09), 6430573F11Rik(-0.1), Tert(-0.11), Ctu2(-0.12), Fars2(-0.12), Nsun4(-0.12), Aars(-0.13), Aars(-0.13), Trmu(-0.15), Eif2a(-0.15), Yrdc(-0.16), Xpo5(-0.17), Cars(-0.18), Trmt1(-0.19), Trnt1(-0.22), Trmt11(-0.22), Aars2(-0.22), Eef1a1(-0.23), Rars(-0.23), Fdxacb…
DNA-methyltransferase activity	2.56347e-07	0.309418	6.4512e-28	2.71718e-26	76	9.23673e-05	2.274e-07	7.28736e-11	2.47101e-05	1.71113e-07	Prdm1(0.57), Prdm11(0.41), Dnmt3a(0.29), Prdm4(0.23), Dnmt3b(0.21), Dnmt1(0.16), Mettl6(0.15), Mettl10(0.12), Mepce(0.08), Prdm10(0.07), Bmt2(0.06), Prdm5(0.05), Alkbh8(0.04), Ehmt1(0.03), Trmt1l(0.02), Tgs1(-0.01), Prmt9(-0.02), Nsun6(-0.03), Smyd4(-0.04), Ehmt2(-0.08), Setd4(-0.1), 6430573F11Rik(-0.1), Nsun7(-0.12), Nsun4(-0.12), Mettl25(-0.12), Mettl24(-0.13), Trmt2a(-0.14), Mettl21a(-0.15), M…
small-subunit processome	5.3143e-07	0.466896	8.6262e-27	3.59053e-25	32	0.000115484	6.02586e-08	1.49846e-07	6.33705e-07	5.50425e-07	Utp14b(0.25), Pdcd11(-0.07), Utp14a(-0.07), Utp20(-0.1), Utp3(-0.12), Ngdn(-0.12), Utp11l(-0.14), Nop14(-0.15), Dcaf13(-0.16), Diexf(-0.17), Utp6(-0.22), Emg1(-0.23), Imp4(-0.23), Imp3(-0.23), Fcf1(-0.24), Krr1(-0.25), Heatr1(-0.25), Wdr3(-0.26), Pwp2(-0.28), Nol6(-0.28), Mphosph10(-0.29), Utp23(-0.3), Nop58(-0.32), Nhp2l1(-0.33), Utp18(-0.34), Noc4l(-0.35), Fbl(-0.36), Tbl3(-0.36), Rrp9(-0.38), …
snoRNA binding	8.87768e-07	0.535078	1.94567e-26	8.00439e-25	24	2.13056e-05	6.42604e-07	9.86708e-07	1.52158e-06	6.19804e-08	Nudt16l1(-0.07), Nudt4(-0.13), Nudt16(-0.13), Utp6(-0.22), Imp4(-0.23), Imp3(-0.23), Nufip1(-0.24), Nufip1(-0.24), Ddx21(-0.24), Heatr1(-0.25), Wdr3(-0.26), Pwp2(-0.28), Nudt7(-0.3), Nop58(-0.32), Nop58(-0.32), Nhp2l1(-0.33), Nudt5(-0.36), Tbl3(-0.36), Rrp9(-0.38), Nudt1(-0.45), Gar1(-0.45), Nop10(-0.48), Nop56(-0.6), Nop56(-0.6),
translational initiation	9.0114e-07	0.335731	7.42252e-26	3.01849e-24	60	0.000878936	1.881e-07	6.71201e-08	1.04293e-06	1.39371e-07	Ddx3x(0.26), Eif4e3(0.2), Eif4g3(0.2), Ddx3y(0.18), Eif3a(0.11), Eif1(0.08), Denr(0.08), Eif5b(0.07), Eif4g1(0.03), Eif2s3y(-0.03), Eif4h(-0.05), Eif4g2(-0.06), Dhx29(-0.06), Eif3c(-0.08), Eif3c(-0.08), Eif5(-0.08), Mcts1(-0.1), Larp1(-0.1), Eif4a1(-0.11), Eif4e(-0.11), Mtif2(-0.11), Eif4a2(-0.12), Eif4e2(-0.12), Eif4b(-0.13), Eif1a(-0.15), Eif2a(-0.15), Eif1b(-0.16), Eif3b(-0.17), Eif3b(-0.17), …
mitochondrial matrix	1.33756e-07	0.250101	9.03554e-26	3.6327e-24	112	0.0142504	8.18438e-05	3.28947e-06	2.39687e-13	9.28348e-09	Hspa1b(1.37), Ak4(0.32), H2-Ke6(0.27), Alas2(0.25), Lrrk2(0.23), Acss1(0.23), Acss1(0.23), Mcl1(0.21), Pde2a(0.2), Creb1(0.19), Abat(0.17), Lactb2(0.14), Sirt3(0.12), Mthfsl(0.09), Ivd(0.06), Tdrd7(0.06), Gls(0.05), Acsm3(0.05), Gstk1(0.05), Acaa2(0.04), Primpol(0.04), Mthfd2l(0.04), Mccc2(0.03), Ccar2(0.02), Pitrm1(0.01), Atxn3(0.01), Ptcd1(-0.02), Ptcd1(-0.02), Sardh(-0.03), Acadl(-0.05), Iscu(…
ribosomal small subunit assembly	8.25911e-07	0.565231	1.12504e-25	4.47233e-24	21	0.000261968	5.4054e-08	5.68021e-07	6.78039e-08	6.5796e-06	Rps27(0.12), Rps17(-0.16), Eral1(-0.19), Eral1(-0.19), Rps25(-0.25), Rps2(-0.27), Mrps7(-0.27), Mrps11(-0.27), Rps10(-0.28), Pwp2(-0.28), Rrp7a(-0.31), Rps14(-0.36), Rps14(-0.36), Rps5(-0.37), Rps27l(-0.38), Rps19(-0.4), Rps19(-0.4), Rps15(-0.44), Rps15(-0.44), Rps28(-0.54), Rpsa(-0.78),
methyltransferase activity	1.18145e-06	0.212783	8.61138e-25	3.38523e-23	145	0.00011965	6.66336e-06	8.34452e-09	1.73446e-05	2.49318e-07	Prdm1(0.57), Kmt2a(0.53), Kmt2d(0.45), Prdm11(0.41), Kmt2e(0.38), Setd2(0.37), Bhmt2(0.35), Setd7(0.35), Ash1l(0.32), Kmt2c(0.31), Dnmt3a(0.29), Kmt2b(0.28), Mtr(0.28), Nsd1(0.24), Whsc1l1(0.24), Prdm4(0.23), Kmt5b(0.22), Dnmt3b(0.21), Setd1b(0.2), Dnmt1(0.16), Mettl6(0.15), Setdb2(0.14), Ezh2(0.12), Inmt(0.12), Mettl10(0.12), Whsc1(0.1), Mepce(0.08), Prdm10(0.07), Bmt2(0.06), Icmt(0.05), Prdm5(0…
mitochondrial nucleoid	1.40465e-06	0.374909	1.32967e-24	5.13354e-23	46	0.000913632	2.4028e-05	1.05897e-06	3.65871e-09	2.36574e-07	Polg2(0.26), Polg(0.03), Sod2(0.02), Slc25a5(-0.04), Atp5b(-0.05), Dhx30(-0.06), Acadvl(-0.08), Dbt(-0.08), Hadha(-0.1), Clpx(-0.1), Tert(-0.11), Hspa9(-0.13), Mpg(-0.14), Mterf1a(-0.14), Tfam(-0.15), Tfam(-0.15), Hadhb(-0.15), Vdac1(-0.16), Lonp1(-0.16), Grsf1(-0.16), Vdac2(-0.17), Mterf2(-0.19), Uqcc2(-0.21), Polrmt(-0.21), Tufm(-0.21), Ssbp1(-0.21), Top1mt(-0.23), Top1mt(-0.23), Lrrc59(-0.23),…
ribosomal large subunit biogenesis	1.25865e-06	0.498401	1.3349e-24	5.13354e-23	26	3.6849e-05	5.62197e-07	8.723e-06	1.49382e-06	3.83293e-07	Zfp622(0.01), Surf6(-0.02), Sdad1(-0.04), Rpl11(-0.09), Rpl5(-0.15), Aamp(-0.16), Malsu1(-0.22), Rpl7(-0.24), Ebna1bp2(-0.27), Rpl35a(-0.29), Rpl35a(-0.29), Yae1d1(-0.29), Nle1(-0.29), Rrs1(-0.31), Rpl14(-0.32), Rpl14(-0.32), Rpl26(-0.35), Rpl26(-0.35), Noc2l(-0.38), Wdr74(-0.42), Bop1(-0.44), Nip7(-0.46), Npm1(-0.47), Npm1(-0.47), Wdr55(-0.48), Nop16(-0.57),
methylation	1.7139e-06	0.20529	3.96695e-24	1.50915e-22	152	0.000156472	6.06097e-06	5.10487e-08	1.13539e-05	3.42379e-07	Prdm1(0.57), Kmt2a(0.53), Kmt2d(0.45), Dnmt3l(0.43), Prdm11(0.41), Kmt2e(0.38), Setd2(0.37), Bhmt2(0.35), Setd7(0.35), Ash1l(0.32), Kmt2c(0.31), Dnmt3a(0.29), Kmt2b(0.28), Mtr(0.28), Nsd1(0.24), Whsc1l1(0.24), Prdm4(0.23), Kmt5b(0.22), Dnmt3b(0.21), Setd1b(0.2), Dnmt1(0.16), Mettl6(0.15), Fam103a1(0.14), Setdb2(0.14), Ezh2(0.12), Inmt(0.12), Mettl10(0.12), Whsc1(0.1), Mepce(0.08), Prdm10(0.07), B…
maturation of SSU-rRNA from tricistronic rRNA transcript (SSU-rRNA, 5.8S rRNA, LSU-rRNA)	3.01193e-06	0.46818	2.66042e-23	1.00134e-21	28	0.000490466	7.27761e-07	1.31487e-06	1.688e-06	1.87645e-06	Bms1(0.07), Ccdc59(0.05), Utp20(-0.1), Mrps9(-0.11), Utp3(-0.12), Ngdn(-0.12), Dcaf13(-0.16), Diexf(-0.17), Utp6(-0.22), Emg1(-0.23), Rrp36(-0.23), Krr1(-0.25), Heatr1(-0.25), Wdr3(-0.26), Mrps11(-0.27), Rps24(-0.28), Pwp2(-0.28), Tsr2(-0.29), Utp18(-0.34), Noc4l(-0.35), Rps14(-0.36), Tbl3(-0.36), Rps19(-0.4), Tsr1(-0.41), Bysl(-0.44), Rps8(-0.5), Wdr46(-0.5), Rps16(-0.74),
preribosome, large subunit precursor	2.85535e-06	0.467712	3.09693e-23	1.15336e-21	28	0.000288394	1.54972e-07	1.28285e-05	1.82839e-06	1.66371e-06	Las1l(0.35), Wdr37(0.1), Zfp622(0.01), Rrp1(-0.05), Tex10(-0.05), Mdn1(-0.09), Aamp(-0.16), Rplp2(-0.23), Rrp1b(-0.23), Ftsj3(-0.24), Nsa2(-0.25), Rpf1(-0.26), Ebna1bp2(-0.27), Rplp1(-0.28), Rrs1(-0.31), Rplp0(-0.33), Eif6(-0.34), Mak16(-0.34), Rrp15(-0.36), Pes1(-0.39), Wdr74(-0.42), Bop1(-0.44), Nip7(-0.46), Ccdc86(-0.46), Mrto4(-0.53), Wdr12(-0.56), Wdr12(-0.56), Ppan(-0.61),
positive regulation of telomerase RNA localization to Cajal body	6.11263e-06	0.629212	1.45834e-22	5.37458e-21	15	0.000255276	5.26638e-07	1.88191e-06	1.20019e-05	3.51356e-06	Tcp1(-0.17), Naf1(-0.2), Cct4(-0.21), Cct8(-0.21), Cct7(-0.25), Cct2(-0.27), Shq1(-0.35), Ruvbl1(-0.39), Cct3(-0.4), Cct5(-0.43), Nop10(-0.48), Nop10(-0.48), Ruvbl2(-0.51), Dkc1(-0.64), Nhp2(-0.79),
respiratory chain	1.26782e-06	0.368148	1.7259e-22	6.29509e-21	53	0.000499662	1.08267e-05	5.21925e-05	7.02021e-07	3.03827e-08	ND5(0.09), COX1(0.08), CYTB(0.08), ND1(0.06), ND2(0.05), Ndufa1(0.04), ND6(0.03), ND4(0.02), Ndufa5(-0.03), Ndufc1(-0.04), Ndufa6(-0.04), Uqcrb(-0.04), Ndufb11(-0.04), Ndufs1(-0.04), Ndufa4(-0.05), Ndufs2(-0.06), Ndufv1(-0.08), Ndufa3(-0.09), Ndufa9(-0.09), Ndufb9(-0.09), Ndufc2(-0.09), Ndufab1(-0.09), Ndufb6(-0.09), Ndufs6(-0.09), Ndufs4(-0.1), Ndufb5(-0.1), Uqcrh(-0.11), Ndufs3(-0.11), Ndufa2(-…
rRNA binding	4.51215e-06	0.375678	2.15579e-22	7.78286e-21	42	0.000443112	9.51825e-06	2.31146e-06	4.28283e-06	3.24404e-07	Rnasel(0.8), Tlr13(0.42), Ptrf(0.29), Sbds(0.16), Rpl9(0.06), Mrps6(0.02), Mterf3(-0.02), Rpl11(-0.09), Kdm2b(-0.12), Nsun4(-0.12), Mterf4(-0.15), Mterf4(-0.15), Rpl5(-0.15), Diexf(-0.17), Eral1(-0.19), Eral1(-0.19), Mrps15(-0.19), Eri1(-0.19), Emg1(-0.23), Mrpl20(-0.23), Imp3(-0.23), Ddx21(-0.24), Mrpl16(-0.24), Rps18(-0.26), Rpf1(-0.26), Mrps7(-0.27), Mrpl11(-0.28), Ptcd3(-0.29), Ddx28(-0.3), F…
DNA repair	4.66996e-06	0.134764	6.04187e-20	2.1592e-18	304	0.00028856	1.26895e-05	7.26565e-08	3.4436e-05	0.000355451	Hspa1a(1.41), Eya4(0.69), Bach1(0.48), Herc2(0.48), Xrcc3(0.41), Ino80d(0.4), Eepd1(0.37), Taok1(0.35), Setx(0.34), Dot1l(0.33), Smg1(0.31), Ercc1(0.29), Ercc1(0.29), Atrx(0.29), Usp47(0.29), Hinfp(0.29), Ubr5(0.28), Fam178a(0.27), Epc2(0.27), Emsy(0.27), Bod1l(0.27), Polg2(0.26), Foxm1(0.25), Kin(0.25), Ercc6(0.23), Ercc6(0.23), Tdp2(0.22), Trrap(0.21), Mbd4(0.2), Ercc5(0.2), Smc5(0.2), Abl1(0.1…
proteasome core complex	1.89794e-05	0.541988	8.51882e-20	3.01396e-18	18	0.000780311	1.54564e-05	4.03163e-06	4.97464e-05	3.2656e-06	Psmb7(-0.12), Psma2(-0.13), Psma7(-0.17), Psmb8(-0.19), Psma3(-0.19), Psma3(-0.19), Psma1(-0.23), Psmb1(-0.24), Psmb4(-0.24), Psmb6(-0.24), Psmb2(-0.24), Psmb3(-0.24), Psmb9(-0.25), Psma6(-0.27), Psma4(-0.31), Psmb10(-0.34), Psmb5(-0.34), Psma5(-0.4),
mitochondrial intermembrane space	1.13964e-05	0.281724	1.79426e-19	6.28525e-18	67	0.0044987	1.30215e-05	1.78303e-06	5.27658e-07	0.000118211	Hsd3b2(0.68), Gatm(0.65), Hsd3b3(0.49), Txnip(0.32), Prelid2(0.3), Star(0.28), Glrx(0.26), Cox17(0.25), Lyn(0.11), Pink1(0.06), Cpox(-0.01), Pdia3(-0.03), Arl2bp(-0.03), Micu2(-0.04), Ndufs1(-0.04), Chchd2(-0.07), Opa1(-0.07), Opa1(-0.07), Aifm1(-0.08), Aifm1(-0.08), Sirt5(-0.08), Ggnbp1(-0.08), Ak3(-0.09), Sod1(-0.1), Fbxl4(-0.1), Cycs(-0.11), Capn10(-0.11), Suox(-0.13), Micu1(-0.13), Micu1(-0.1…
chaperonin-containing T-complex	2.40127e-05	0.588356	2.02648e-19	7.02911e-18	15	0.00131669	7.1461e-06	8.16419e-06	1.71643e-05	1.45191e-05	Cct6b(0.64), Tcp1(-0.17), Tcp1(-0.17), Cct4(-0.21), Cct4(-0.21), Cct8(-0.21), Cct8(-0.21), Cct7(-0.25), Cct7(-0.25), Cct2(-0.27), Cct2(-0.27), Cct3(-0.4), Cct3(-0.4), Cct5(-0.43), Cct5(-0.43),
eukaryotic translation initiation factor 3 complex	2.08967e-05	0.423411	2.14418e-19	7.36514e-18	29	0.00125871	3.36201e-06	0.000167044	1.71887e-05	1.21869e-06	Ddx3x(0.26), Eif3a(0.11), Eif3a(0.11), Eif3c(-0.08), Eif3c(-0.08), Eif3j1(-0.09), Eif3j1(-0.09), Eif3j2(-0.09), Eif3j2(-0.09), Eif3b(-0.17), Eif3b(-0.17), Eif3i(-0.18), Eif3i(-0.18), Eif3l(-0.19), Eif3l(-0.19), Eif3f(-0.2), Eif3f(-0.2), Eif3k(-0.2), Eif3k(-0.2), Eif3h(-0.21), Eif3h(-0.21), Eif3g(-0.27), Eif3g(-0.27), Eif3m(-0.28), Eif3e(-0.29), Eif3e(-0.29), Abce1(-0.33), Eif3d(-0.35), Eif3d(-0.3…
spliceosomal snRNP assembly	3.41061e-05	0.444216	2.78107e-18	9.46099e-17	25	0.000348286	1.42382e-05	3.7348e-05	3.68833e-05	6.63278e-05	Rbm22(0.11), Sart3(0.07), Sart1(0.06), Snrpf(-0.05), Ddx20(-0.1), Gemin2(-0.1), Strap(-0.12), Snrpe(-0.14), Snrpc(-0.16), Snrpb(-0.17), Gemin7(-0.19), Snrpd3(-0.23), Snrpd3(-0.23), Lsm4(-0.24), Gemin5(-0.34), Snrpd1(-0.35), Snrpd1(-0.35), Snrpd2(-0.38), Snrpd2(-0.38), Gemin8(-0.4), Gemin8(-0.4), Clns1a(-0.47), Prmt5(-0.5), Prmt7(-0.56), Gemin6(-0.79),
threonine-type endopeptidase activity	4.97509e-05	0.517912	6.72556e-18	2.26619e-16	18	0.000779414	4.76667e-05	1.48054e-05	0.000132724	1.29693e-05	Tasp1(-0.1), Psmb7(-0.12), Psma2(-0.13), Psma7(-0.17), Psmb8(-0.19), Psma3(-0.19), Psma1(-0.23), Psmb1(-0.24), Psmb4(-0.24), Psmb6(-0.24), Psmb2(-0.24), Psmb3(-0.24), Psmb9(-0.25), Psma6(-0.27), Psma4(-0.31), Psmb10(-0.34), Psmb5(-0.34), Psma5(-0.4),
ribonuclease P activity	6.05341e-05	0.602459	1.9085e-17	6.37006e-16	13	0.00496124	4.20599e-05	1.04719e-05	0.000129759	5.26592e-06	Pop4(-0.12), Pop5(-0.24), Pop7(-0.26), Rpp21(-0.32), Rpp30(-0.35), Rpp40(-0.43), Pop1(-0.46), Pop1(-0.46), 1110008L16Rik(-0.47), 1110008L16Rik(-0.47), Rpp14(-0.47), Rpp38(-0.72), Rpp25(-0.79),
catalytic step 2 spliceosome	5.57401e-05	0.21419	2.39301e-17	7.91258e-16	106	0.00150944	0.00012413	4.80114e-05	9.99792e-06	3.60122e-05	Sf3b1(0.29), Sf3b1(0.29), Hnrnph1(0.28), Ddx5(0.26), Snrnp200(0.23), Hnrnpu(0.14), Prpf8(0.13), Prpf8(0.13), Dhx38(0.12), Hnrnpr(0.12), Rbm22(0.11), Prpf4b(0.1), Hnrnpa2b1(0.1), Syf2(0.1), Syf2(0.1), Pnn(0.09), Pnn(0.09), Hnrnpm(0.09), Syncrip(0.08), Dhx8(0.08), Cactin(0.07), Zcchc8(0.07), Slu7(0.07), Sart1(0.06), Prpf6(0.06), Prpf6(0.06), Rbmx(0.03), Cwc27(0.03), Tfip11(0.02), Magohb(0.02), Gpat…
spliceosomal complex	6.81304e-05	0.186176	7.31459e-17	2.39621e-15	139	0.00229236	7.32379e-05	4.4191e-05	1.29031e-05	0.000104087	Ptbp2(0.33), Sf3b1(0.29), Hnrnph1(0.28), Lgals3(0.27), Hnrnpa3(0.27), Akap17b(0.27), Ddx5(0.26), Hspa8(0.24), Srrm2(0.24), Zfp326(0.23), Rbm5(0.23), Snrnp200(0.23), Prpf38b(0.19), Scaf8(0.18), Rbm25(0.16), Hnrnpu(0.14), Sf1(0.13), Prpf8(0.13), Srrm1(0.12), Dhx38(0.12), Zrsr2(0.11), Rbm22(0.11), Prpf4b(0.1), Hnrnpa2b1(0.1), Syf2(0.1), Wac(0.1), Pnn(0.09), Lsm5(0.09), Hnrnpm(0.09), Syncrip(0.08), P…
mRNA processing	7.76771e-05	0.132112	1.40938e-16	4.57467e-15	300	0.00535757	6.33337e-05	2.66354e-06	0.000101541	0.000135485	Aff2(0.83), Rnasel(0.8), Noct(0.59), Rbm4(0.44), Mbnl3(0.42), Celf4(0.4), Qk(0.36), Ptbp2(0.33), Cdk12(0.33), Adarb1(0.32), Ythdc1(0.32), Son(0.3), Son(0.3), Sf3b1(0.29), Hnrnph1(0.28), Prpf39(0.28), Lgals3(0.27), Plcb1(0.27), Supt6(0.27), Hnrnpa3(0.27), Akap17b(0.27), Ddx5(0.26), Kin(0.25), Rbmxl1(0.25), Rbm4b(0.25), Hspa8(0.24), Srrm2(0.24), Rbm39(0.24), Zfp326(0.23), Rbm5(0.23), Snrnp200(0.23)…
SMN-Sm protein complex	8.4399e-05	0.51497	1.50541e-16	4.84194e-15	17	0.00134145	8.17064e-05	0.000141577	5.86675e-05	2.89004e-05	Snrpf(-0.05), Ddx20(-0.1), Gemin2(-0.1), Strap(-0.12), Snrpb(-0.17), Gemin7(-0.19), Snrpd3(-0.23), Snrpd3(-0.23), Smn1(-0.25), Snrpg(-0.33), Gemin5(-0.34), Snrpd1(-0.35), Snrpd1(-0.35), Snrpd2(-0.38), Gemin8(-0.4), Gemin8(-0.4), Gemin6(-0.79),
ribosomal small subunit biogenesis	7.6358e-05	0.500238	1.69505e-16	5.40277e-15	18	0.0015648	7.27491e-06	0.000746469	0.000151926	1.55699e-05	Surf6(-0.02), Nom1(-0.03), Rps6(-0.14), Rps6(-0.14), Utp11l(-0.14), Rps17(-0.16), Rrp36(-0.23), Ltv1(-0.27), Rps24(-0.28), Rps19(-0.4), Rps7(-0.42), Rps7(-0.42), Nob1(-0.43), Rps15(-0.44), Npm1(-0.47), Npm1(-0.47), Rps28(-0.54), Rps16(-0.74),
cellular response to DNA damage stimulus	2.26917e-05	0.107335	1.86893e-16	5.90383e-15	414	0.00427363	0.00023882	1.23912e-07	1.71879e-05	0.00261605	E2f7(0.85), Pmaip1(0.76), Eya4(0.69), Plk3(0.58), Plk3(0.58), Gadd45a(0.55), Herc2(0.48), Zc3h12a(0.46), Batf(0.44), Hipk2(0.42), Rnf169(0.42), Xrcc3(0.41), Sirt1(0.4), Ino80d(0.4), Chd2(0.39), Brsk1(0.37), Apc(0.35), Setd7(0.35), Taok1(0.35), Setx(0.34), Smg1(0.31), Casp3(0.3), Ercc1(0.29), Atrx(0.29), Nipbl(0.29), Usp47(0.29), Ubr5(0.28), Cdkn2aip(0.27), Fam178a(0.27), Epc2(0.27), Emsy(0.27), F…
metabolic process	1.66046e-07	0.135947	2.65587e-16	8.31545e-15	381	0.270449	0.0930217	8.16388e-05	7.71024e-17	1.56062e-05	Acod1(1.12), Acod1(1.12), Pak3(0.97), Hk2(0.79), Aldh1a3(0.73), Prkg1(0.72), Acsl6(0.72), Hsd3b2(0.68), Gys2(0.66), Chil3(0.59), Tnfaip3(0.54), Sptlc3(0.54), Hk3(0.53), Pde10a(0.52), Sulf1(0.52), Hsd3b3(0.49), Acsm5(0.49), Cndp1(0.48), Neu2(0.46), Zc3h12a(0.46), Amy1(0.44), Mgea5(0.41), Pah(0.4), Aspa(0.38), Stard9(0.36), Neu3(0.35), Cemip(0.35), Pygl(0.35), Cdyl2(0.34), Agpat4(0.32), Pign(0.31),…
pseudouridine synthase activity	0.000124942	0.562187	2.8853e-16	8.95454e-15	14	0.000197553	8.58561e-05	4.565e-05	0.000201031	0.000408697	Rpusd1(0.03), Pus7l(-0.13), Pus10(-0.16), Rpusd4(-0.17), Trub2(-0.3), Rpusd2(-0.31), Pus7(-0.43), Pus1(-0.44), Pus1(-0.44), Pus1(-0.44), Trub1(-0.49), Pusl1(-0.51), Rpusd3(-0.52), Dkc1(-0.64),
pseudouridine synthesis	0.000158734	0.536141	8.38227e-16	2.57882e-14	15	0.000154661	6.54118e-05	5.05363e-05	0.000615423	0.000568256	Rpusd1(0.03), Pus7l(-0.13), Pus10(-0.16), Rpusd4(-0.17), Naf1(-0.2), Trub2(-0.3), Rpusd2(-0.31), Pus7(-0.43), Pus1(-0.44), Gar1(-0.45), Nop10(-0.48), Trub1(-0.49), Pusl1(-0.51), Rpusd3(-0.52), Dkc1(-0.64),
DNA-directed RNA polymerase activity	0.000135655	0.350339	1.20034e-15	3.66105e-14	35	0.01216	4.27272e-05	2.80558e-05	4.78724e-05	0.000161354	Polr2a(0.23), Polr3a(0.08), Polr3f(0.05), Primpol(0.04), Znrd1(-0.02), Polr2b(-0.04), Crcp(-0.07), Polr2k(-0.08), Rpap1(-0.09), Polr2l(-0.1), Polr3b(-0.11), Prim2(-0.12), Polr2m(-0.12), Polr1d(-0.13), Polr2c(-0.13), Polr3k(-0.14), Polr2d(-0.15), Polr2d(-0.15), Polr3c(-0.17), Polr2g(-0.18), Polr3d(-0.19), Polrmt(-0.21), Polr3e(-0.22), Twistnb(-0.23), Polr2h(-0.23), Polr2i(-0.25), Prim1(-0.31), Pol…
RNA splicing	0.000143757	0.147546	3.60724e-15	1.09081e-13	228	0.00611431	0.000102418	1.44042e-05	0.000268136	0.000203886	Aff2(0.83), Rbm4(0.44), Mbnl3(0.42), Celf4(0.4), Qk(0.36), Ptbp2(0.33), Cdk12(0.33), Ythdc1(0.32), Son(0.3), Sf3b1(0.29), Hnrnph1(0.28), Prpf39(0.28), Lgals3(0.27), Supt6(0.27), Hnrnpa3(0.27), Akap17b(0.27), Ddx5(0.26), Rbmxl1(0.25), Wt1(0.25), Rbm4b(0.25), Hspa8(0.24), Srrm2(0.24), Rbm39(0.24), Zfp326(0.23), Rbm5(0.23), Snrnp200(0.23), Srpk2(0.22), Srpk2(0.22), Iws1(0.22), Rbfox2(0.22), Cdk13(0.…
eukaryotic translation initiation factor 2B complex	0.000170549	0.643669	5.11116e-15	1.53248e-13	10	0.0543699	0.000132939	1.49942e-05	7.7158e-05	2.1445e-05	Eif2b2(-0.19), Eif2b2(-0.19), Eif2b5(-0.21), Eif2b4(-0.22), Eif2b4(-0.22), Eif2b1(-0.3), Eif2b1(-0.3), Eif2s1(-0.39), Eif2s1(-0.39), Eif2b3(-0.39),
oxidoreductase activity	1.04163e-06	0.117971	7.97298e-15	2.37045e-13	480	0.484272	0.0943082	0.00243709	1.73186e-14	2.92558e-08	Gpx6(1.66), Ptgs2(1.16), Dhrs9(1.07), Akr1c21(0.92), Akr1b7(0.89), Rdh12(0.79), Ch25h(0.76), Cyp2b10(0.74), Aldh1a3(0.73), Cybrd1(0.71), Cyp27b1(0.69), Hsd3b2(0.68), Jmjd1c(0.68), Dio2(0.66), Steap4(0.65), Moxd1(0.64), Hr(0.61), Bco2(0.61), Tbxas1(0.55), Alox5(0.53), Kcnab1(0.53), Nos3(0.51), Hsd3b3(0.49), Tet3(0.48), Cyp4f18(0.47), Nos2(0.45), Aloxe3(0.45), Lox(0.44), Akr1c18(0.44), Kdm6b(0.43),…
maturation of LSU-rRNA from tricistronic rRNA transcript (SSU-rRNA, 5.8S rRNA, LSU-rRNA)	0.000233164	0.635656	1.19497e-14	3.52317e-13	10	0.00439007	0.000109568	0.000219569	0.000201651	0.000113731	Gtpbp4(-0.1), Rpl7(-0.24), Ftsj3(-0.24), Rpl7l1(-0.33), Pes1(-0.39), Pes1(-0.39), Rpl35(-0.43), Bop1(-0.44), Rpf2(-0.44), Wdr12(-0.56),
mitochondrial respiratory chain complex I assembly	0.000123951	0.45191	1.2909e-14	3.77455e-13	20	0.00682389	0.000346715	0.000106478	3.426e-05	0.000240885	Ndufc2(-0.09), Ndufs4(-0.1), Ndufaf3(-0.13), Taz(-0.13), Oxa1l(-0.16), Ndufaf7(-0.18), Ndufaf7(-0.18), Timm21(-0.19), Timm21(-0.19), Acad9(-0.19), Ndufs8(-0.2), Ndufaf6(-0.21), Ndufaf6(-0.21), Foxred1(-0.22), Nubpl(-0.24), Ndufs7(-0.28), Ndufs5(-0.33), Ndufaf5(-0.34), Bcs1l(-0.47), Ndufaf4(-0.52),
iron-sulfur cluster binding	9.05979e-05	0.26206	2.17291e-14	6.28311e-13	61	0.0282065	0.00191059	5.3136e-05	2.11353e-07	0.000821591	Cmah(0.4), Rev3l(0.19), Abat(0.17), Xdh(0.16), Aifm3(0.16), Brip1(0.1), Dpyd(0.09), Rsad2(0.06), Mocs1(0.03), Ireb2(0.03), Cdk5rap1(0.02), Pola1(0), Mutyh(0), Aco2(-0.03), Aco1(-0.04), Ercc2(-0.04), Ndufs1(-0.04), Iscu(-0.05), Isca1(-0.05), Ndufs2(-0.06), Fdx1(-0.07), Ndufv1(-0.08), Pole(-0.09), Cisd2(-0.1), Lias(-0.1), Rtel1(-0.1), Etfdh(-0.11), Prim2(-0.12), Uqcrfs1(-0.14), Sdhb(-0.14), Glrx2(-…
isomerase activity	0.000131447	0.198557	2.18435e-14	6.28311e-13	103	0.0344308	0.00153512	1.85051e-05	2.55239e-05	4.33427e-05	Hsd3b2(0.68), Tbxas1(0.55), Hpgds(0.5), Hsd3b3(0.49), Aloxe3(0.45), Amacr(0.4), Dse(0.37), Nktr(0.36), Ptges(0.21), Pgm1(0.18), Dsel(0.17), Fkbp5(0.15), Fkbp10(0.15), Ppil6(0.15), Top1(0.13), Fkbp14(0.13), Top2b(0.12), Tmx3(0.11), Ppig(0.1), Ppil4(0.09), Fkbp7(0.07), Pdilt(0.07), Pgm2l1(0.06), Fkbp1b(0.05), Hmgcs1(0.05), Eci3(0.04), Cwc27(0.03), Ppib(0), Mut(-0.01), Top3a(-0.01), Pdia3(-0.03), Pp…
DNA-directed RNA polymerase I complex	0.00028886	0.512873	2.95673e-14	8.43621e-13	15	0.0159855	0.000105107	2.86907e-05	0.000254384	0.000288479	Znrd1(-0.02), Polr2k(-0.08), Polr2l(-0.1), Polr1d(-0.13), Twistnb(-0.23), Polr2h(-0.23), Cd3eap(-0.32), Polr1a(-0.33), Polr1a(-0.33), Polr1c(-0.34), Polr2e(-0.43), Polr2f(-0.45), Polr1b(-0.59), Polr1b(-0.59), Polr1e(-0.66),
proteasome accessory complex	0.000187605	0.484858	3.50415e-14	9.91815e-13	18	0.0838787	0.000647725	3.47314e-05	1.14957e-05	4.16287e-05	Psmd11(0.03), Psmd11(0.03), Psmd2(-0.09), Psmd1(-0.09), Psmd3(-0.1), Psmd6(-0.1), Psmc1(-0.12), Psmc2(-0.16), Psmc5(-0.16), Psmc6(-0.16), Psmc3(-0.17), Psmc4(-0.17), Psmd12(-0.17), Psmd13(-0.18), Psmd8(-0.23), Psmd4(-0.24), Psmd14(-0.28), Psmd5(-0.3),
proteolysis involved in cellular protein catabolic process	0.000298837	0.297434	5.42549e-14	1.52344e-12	44	0.000833167	9.05938e-05	0.000142889	0.00343917	0.000342204	4930486L24Rik(0.42), Ctsc(0.31), Adamts7(0.3), Adamts12(0.18), Hspa5(0.17), Ctsl(0.13), Ctss(0.09), Ctss(0.09), Ctsk(0.08), Ctsk(0.08), Dnajc3(-0.02), Capn2(-0.04), Clpx(-0.1), Ctsf(-0.11), Ctsh(-0.12), Ctsa(-0.12), Psmb7(-0.12), Casp8(-0.13), Ctsb(-0.13), Ctsb(-0.13), Psma2(-0.13), Ctso(-0.14), Lonp1(-0.16), Psma7(-0.17), Scpep1(-0.18), Psmb8(-0.19), Psma3(-0.19), Ide(-0.23), Ide(-0.23), Psma1(-…
cytoplasmic translation	0.000216116	0.43164	6.58063e-14	1.83325e-12	21	0.00180798	0.000111924	0.00233671	0.0010562	2.51701e-05	Rpl9(0.06), Rpl22l1(-0.01), Eif4h(-0.05), Eif3j1(-0.09), Eif3j2(-0.09), Eif4b(-0.13), Rpl36(-0.21), Ftsj1(-0.21), Rplp2(-0.23), Rpl7(-0.24), Rpl15(-0.25), Rpl6(-0.28), Rplp1(-0.28), Rpl22(-0.29), Rpl35a(-0.29), Rpl31(-0.3), Rpl8(-0.31), Rplp0(-0.33), Rpl7l1(-0.33), Rpl26(-0.35), Rpl29(-0.37),
protein folding	0.000226913	0.184019	8.86853e-14	2.45132e-12	115	0.0304981	0.000126173	0.000194761	3.27712e-05	0.000342043	Cct6b(0.64), Dnajb1(0.56), Dnajb4(0.47), Dnaja1(0.44), Ric3(0.42), Dnajb5(0.4), Nktr(0.36), Hspa8(0.24), Hsp90aa1(0.24), Ranbp2(0.23), Tmx4(0.19), Dnajb13(0.18), Dnaja4(0.17), Fkbp15(0.16), Fkbp5(0.15), Fkbp10(0.15), Ppil6(0.15), Qsox1(0.14), Tbce(0.13), Fkbp14(0.13), Tmx3(0.11), Ppig(0.1), Ppil4(0.09), Fkbp7(0.07), Fkbp1b(0.05), Hsp90ab1(0.05), Grpel2(0.05), Hsp90b1(0.05), Vbp1(0.05), Dnajb6(0.0…
cullin deneddylation	0.000349528	0.503968	1.13705e-13	3.11852e-12	15	0.00696714	0.000803512	9.40182e-05	0.00084508	4.69305e-05	Gps1(-0.07), Gps1(-0.07), Cops2(-0.11), Cops4(-0.13), Cops4(-0.13), Cops8(-0.13), Cops5(-0.15), Cops7b(-0.15), Cops7b(-0.15), Cops6(-0.17), Cops6(-0.17), Cops3(-0.22), Cops3(-0.22), Cops7a(-0.41), Cops7a(-0.41),
DNA-directed RNA polymerase III complex	0.000386351	0.365842	2.18948e-13	5.95874e-12	28	0.0171632	0.000140452	0.00101901	6.63864e-05	0.000198476	Polr3a(0.08), Polr3a(0.08), Polr3f(0.05), Polr3f(0.05), Crcp(-0.07), Polr2k(-0.08), Polr2l(-0.1), Polr3gl(-0.11), Polr3gl(-0.11), Polr3b(-0.11), Polr3b(-0.11), Polr1d(-0.13), Polr3k(-0.14), Polr3c(-0.17), Polr3c(-0.17), Polr3d(-0.19), Polr3d(-0.19), Polr3e(-0.22), Polr3e(-0.22), Polr2h(-0.23), Polr1c(-0.34), Polr1c(-0.34), Polr3h(-0.37), Polr3h(-0.37), Polr2e(-0.43), Polr2f(-0.45), Polr3g(-0.74),…
tRNA methylation	0.000449754	0.411529	2.34515e-13	6.33369e-12	22	0.000193557	0.00446882	2.8226e-05	0.000714231	0.00258278	Alkbh8(0.04), Alkbh8(0.04), Trmt13(0.04), Trmt44(-0.02), Mto1(-0.04), Gtpbp3(-0.11), Nsun4(-0.12), Trdmt1(-0.15), Trdmt1(-0.15), Ftsj1(-0.21), Trmt6(-0.21), Lcmt2(-0.27), Trmt10a(-0.33), Tarbp1(-0.33), Nsun2(-0.36), Nsun2(-0.36), Thumpd3(-0.4), Thumpd2(-0.4), Trmt112(-0.41), Trmt5(-0.43), Trmo(-0.47), Trmt61a(-0.66),
maturation of LSU-rRNA	0.000402701	0.482502	2.57573e-13	6.86902e-12	16	0.0266382	0.000115734	8.29486e-05	0.00126436	8.95828e-05	Las1l(0.35), Wdr37(0.1), Tex10(-0.05), Rpl7a(-0.2), Nsa2(-0.25), Rpf1(-0.26), Rpl10a(-0.33), Nhp2l1(-0.33), Eif6(-0.34), Mak16(-0.34), Rsl1d1(-0.36), Rrp15(-0.36), Mrpl1(-0.36), Nop2(-0.46), Wdr12(-0.56), Nhp2(-0.79),
mRNA splicing, via spliceosome	0.000396688	0.194694	2.58219e-13	6.86902e-12	107	0.0173099	0.000259484	0.000815901	3.36852e-05	0.000304771	Raver2(0.38), Ythdc1(0.32), Spen(0.31), Sf3b1(0.29), Sf3b1(0.29), Rbm41(0.29), Rbm15(0.27), Snrnp200(0.23), Tra2a(0.18), Rbm15b(0.16), Tra2b(0.15), Sf1(0.13), Prpf8(0.13), Srrm1(0.12), Dhx38(0.12), Dhx38(0.12), Zrsr2(0.11), Zrsr2(0.11), Hnrnpa2b1(0.1), Syf2(0.1), Lsm5(0.09), Hnrnpm(0.09), Prpf3(0.08), Dhx8(0.08), Sart3(0.07), Sart1(0.06), Rnpc3(0.06), Prpf6(0.06), Usp49(0.05), Snrnp70(0.04), Lsm8…
vesicle-mediated transport	0.000551334	0.139389	5.27337e-13	1.39233e-11	198	0.00426121	0.00111157	5.70452e-05	0.00041294	0.0011982	Stx1b(0.69), Stx11(0.68), Stxbp5l(0.64), Stx1a(0.34), Mapk8ip3(0.3), Fnbp1l(0.29), Ap3b2(0.28), Gsn(0.28), Optn(0.27), Spag9(0.26), Sec24a(0.25), Nck2(0.24), Picalm(0.24), Ahi1(0.23), Ap1s2(0.23), Cltc(0.22), Sft2d1(0.22), Sec16b(0.21), Stxbp1(0.2), Stx5a(0.18), Rint1(0.18), Stx2(0.17), Rhobtb3(0.16), Sft2d2(0.16), Rab2b(0.15), Cul3(0.14), Stx6(0.14), Fnbp1(0.12), Arfgap1(0.12), Gga3(0.12), Ap4m1…
U4 snRNP	0.000460563	0.51014	5.61239e-13	1.47086e-11	14	0.00357563	0.000115087	0.00387968	0.000519561	0.000163108	Snrpf(-0.05), Ddx39b(-0.11), Snrpn(-0.13), Snrpe(-0.14), Snrpb(-0.17), Snrpb(-0.17), Snrpd3(-0.23), Snrpd3(-0.23), Prpf31(-0.24), Prpf31(-0.24), Snrpg(-0.33), Snrpd1(-0.35), Snrpd1(-0.35), Snrpd2(-0.38),
peroxisome	4.94688e-06	0.208216	8.21902e-13	2.13815e-11	150	0.593671	0.129895	0.00111155	5.64541e-14	4.99937e-06	Acsl6(0.72), Baat(0.54), Nos2(0.45), Amacr(0.4), Pmvk(0.38), Pmvk(0.38), Tmem173(0.37), Acot5(0.35), Urah(0.3), Far2(0.27), Abcd2(0.24), Marf1(0.24), Szt2(0.24), Syt7(0.23), Idi1(0.22), Acsl4(0.19), Acox3(0.19), Hao2(0.17), Slc22a21(0.17), Mvd(0.17), Vim(0.16), Xdh(0.16), Pecr(0.15), Pecr(0.15), Pecr(0.15), Akap11(0.14), Akap11(0.14), Agps(0.14), Gbf1(0.11), Myo5a(0.09), Far1(0.07), Far1(0.07), S…
glutathione transferase activity	0.000349393	0.311074	1.3955e-12	3.60386e-11	37	0.0582126	0.00982514	0.000824747	6.53853e-08	0.000487482	Hpgds(0.5), Gstm2(0.18), Gstm2(0.18), Gsto1(0.09), Gsto1(0.09), Gstk1(0.05), Gstk1(0.05), Ltc4s(-0.05), Gm10639(-0.06), Gstt1(-0.07), Gstt1(-0.07), Gsta4(-0.08), Gsta4(-0.08), Gstt3(-0.1), Mgst1(-0.12), Mgst1(-0.12), Gstm7(-0.12), Gstt2(-0.13), Gstt2(-0.13), Gstz1(-0.18), Gstz1(-0.18), Mgst3(-0.27), Gstm1(-0.31), Gsta3(-0.32), Gstm4(-0.33), Gstm4(-0.33), Eef1g(-0.33), Gsta2(-0.36), Gstm5(-0.43), …
cytosolic proteasome complex	0.000586521	0.523474	1.51737e-12	3.89017e-11	13	0.0367071	0.000301314	6.35122e-05	0.000756056	0.000370604	Psmc1(-0.12), Uchl5(-0.14), Psmc2(-0.16), Psmc5(-0.16), Psmc5(-0.16), Psmc6(-0.16), Psmc6(-0.16), Psmc3(-0.17), Psmc4(-0.17), Psmc4(-0.17), Ubqln4(-0.22), Ide(-0.23), Psmd14(-0.28),
DNA replication	0.000574993	0.174397	1.61889e-12	4.12061e-11	117	0.00617207	0.00019407	2.71063e-05	0.00159214	0.00550371	Rbms1(0.43), Ccdc88a(0.43), Polg2(0.26), Kin(0.25), Kin(0.25), Orc1(0.24), Pola2(0.24), Pola2(0.24), Nup98(0.24), Fam111a(0.23), Cdc45(0.22), E4f1(0.22), Rev3l(0.19), Rbbp6(0.17), Fen1(0.16), Rrm2(0.15), Top1(0.13), Rmi1(0.13), Blm(0.12), Ing5(0.11), Nfib(0.1), Rrm2b(0.09), Chaf1b(0.07), Sin3a(0.06), Slx4(0.06), Pold3(0.06), Gins3(0.05), Upf1(0.04), Mcm4(0.03), Polg(0.03), Orc4(0.02), Rfc1(0.01),…
mitochondrial proton-transporting ATP synthase complex	0.000286234	0.506418	3.26566e-12	8.2528e-11	17	0.0185063	0.0035954	0.00239956	0.000100222	2.62583e-05	Atp5j(-0.02), Atp5b(-0.05), Atp5a1(-0.06), Atp5h(-0.08), Atp5e(-0.12), Atp5j2(-0.13), Atp5c1(-0.14), Atp5o(-0.14), Atp5f1(-0.15), Atp5k(-0.15), Atp5d(-0.17), Usmg5(-0.19), Usmg5(-0.19), Atp5l(-0.2), Atp5l(-0.2), Atpif1(-0.24), Atp5g1(-0.29),
tRNA aminoacylation	0.000861493	0.5105	5.73456e-12	1.43893e-10	13	0.013837	0.00130826	0.000776233	4.3644e-05	0.0020133	Aarsd1(0.07), Eprs(-0.1), Fars2(-0.12), Aars(-0.13), Aars2(-0.22), Dars2(-0.27), Farsa(-0.29), Tars2(-0.35), Tars(-0.4), Tarsl2(-0.45), Yars2(-0.48), Yars2(-0.48), Ears2(-0.81),
proteasome regulatory particle, base subcomplex	0.000835264	0.495213	7.17046e-12	1.78655e-10	14	0.0389867	0.00052537	0.000991681	0.000191814	0.000312663	Psmd2(-0.09), Psmd1(-0.09), Psmd9(-0.1), Psmd9(-0.1), Psmc1(-0.12), Psmc2(-0.16), Psmc5(-0.16), Psmc6(-0.16), Psmc3(-0.17), Psmc4(-0.17), Psmd10(-0.21), Psmd4(-0.24), Psmd5(-0.3), Psmd5(-0.3),
large ribosomal subunit	0.000923568	0.506332	9.99188e-12	2.47212e-10	13	0.00421412	0.0010343	0.000416964	0.00578716	0.000319347	Rbm3(0.18), Rpl17(0), Rpl4(-0.2), Rpl27a(-0.21), Mrpl32(-0.25), Mrpl2(-0.29), Rpl8(-0.31), Mrpl15(-0.31), Rpl10a(-0.33), Mrpl22(-0.34), Mrpl1(-0.36), Rpl13a(-0.41), Npm1(-0.47),
lysosome	0.000336952	0.119889	1.27692e-11	3.13733e-10	317	0.067535	0.0129455	0.00293808	7.21373e-06	2.05685e-05	Cxcr4(0.86), Il1b(0.69), Gja1(0.63), Cckar(0.56), Tnfaip3(0.54), Acpp(0.44), Tlr7(0.44), Mt1(0.42), 4930486L24Rik(0.42), Tm6sf1(0.41), Ramp3(0.4), Laptm5(0.37), Gimap5(0.37), Arrdc3(0.34), Calcrl(0.32), Ctsc(0.31), Ctsc(0.31), Slc11a1(0.31), Slc15a3(0.31), Mmd(0.29), P2ry2(0.28), Ren1(0.28), Src(0.26), Tpcn2(0.25), Tpcn2(0.25), Ada(0.24), Hspa8(0.24), Znrf1(0.24), Npc1(0.23), Syt7(0.23), Lrrk2(0.…
nuclear pore	0.000776968	0.215642	1.77249e-11	4.32487e-10	73	0.0297392	0.00113002	0.000134275	0.000363416	0.00221641	Nup98(0.24), Ranbp2(0.23), Tnks(0.23), Nup210l(0.23), Tpr(0.22), Tpr(0.22), Lbr(0.16), Ahctf1(0.15), Nup160(0.13), Nup160(0.13), Pom121(0.12), Pom121(0.12), Kpna4(0.11), Myo1c(0.11), Nxf1(0.1), Nup93(0.08), Nup93(0.08), Nup188(0.05), Nup153(0.04), Nup214(0.03), Nup50(0.02), Nup50(0.02), Pik3r4(0.02), Nup54(0.02), Nup88(0.01), Nup88(0.01), Eif5a2(0), Mcm3ap(-0.01), Senp2(-0.02), Kpna1(-0.04), Xpo7…
glutathione metabolic process	0.000248411	0.280673	2.32209e-11	5.62709e-10	48	0.408708	0.0620038	6.91172e-05	3.07213e-08	9.85429e-05	Gstm2(0.18), Ggt7(0.18), Gsto1(0.09), Hmgn5(0.09), Ggt5(0.07), Gclc(0.05), Gstk1(0.05), Nat8(0.04), Sod2(0.02), Gstt1(-0.07), Gstt1(-0.07), Gstt1(-0.07), Glo1(-0.07), Aldh5a1(-0.07), Idh1(-0.08), Gpx3(-0.09), Sod1(-0.1), Gstt3(-0.1), Gsr(-0.11), Gsr(-0.11), Mgst1(-0.12), Ethe1(-0.12), Gstm7(-0.12), Gstt2(-0.13), Gstt2(-0.13), Ctns(-0.13), Ggt1(-0.16), Gstz1(-0.18), Gstz1(-0.18), Gpx1(-0.21), G6pd…
tRNA modification	0.00143654	0.479713	2.36499e-11	5.69208e-10	14	0.00795082	0.000820033	0.000600985	0.000929874	0.00254324	Cdk5rap1(0.02), Trit1(-0.11), Gtpbp3(-0.11), Aars(-0.13), Thumpd1(-0.14), Aars2(-0.22), 2210016F16Rik(-0.24), Qtrtd1(-0.27), Thg1l(-0.29), Qtrt1(-0.3), Adat2(-0.37), Wdr4(-0.43), Trub1(-0.49), Mettl1(-0.71),
iron-sulfur cluster assembly	0.00113311	0.435701	2.65049e-11	6.33611e-10	17	0.0241485	0.0027067	0.000253401	0.000342172	0.00116502	Mms19(-0.01), Iscu(-0.05), Isca1(-0.05), Fam96b(-0.11), Ciao1(-0.19), Hscb(-0.2), Hscb(-0.2), Ciapin1(-0.2), Fxn(-0.22), Narfl(-0.22), Narfl(-0.22), Isca2(-0.22), Fam96a(-0.24), Nfu1(-0.25), Iba57(-0.26), Nubp2(-0.3), Nubp1(-0.4),
DNA-directed RNA polymerase II, core complex	0.00143963	0.330621	4.51427e-11	1.07191e-09	29	0.031811	0.000437694	0.00186163	0.00027129	0.00157384	Brd4(0.33), Chd6(0.32), Polr2a(0.23), Polr2a(0.23), Zfp768(0.09), Polr2b(-0.04), Polr2b(-0.04), Polr2k(-0.08), Polr2k(-0.08), Polr2l(-0.1), Polr2l(-0.1), Polr2c(-0.13), Polr2c(-0.13), Polr2d(-0.15), Polr2d(-0.15), Polr2g(-0.18), Polr2g(-0.18), Polr2h(-0.23), Polr2h(-0.23), Uri1(-0.24), Uri1(-0.24), Polr2i(-0.25), Polr2i(-0.25), Polr2j(-0.32), Polr2j(-0.32), Polr2e(-0.43), Polr2e(-0.43), Polr2f(-0…
maturation of SSU-rRNA	0.00130936	0.474954	5.02513e-11	1.18526e-09	14	0.0256315	0.000435516	0.000403157	0.00115666	0.00269267	Utp14b(0.25), Utp14a(-0.07), Nop14(-0.15), Lsm6(-0.15), Srfbp1(-0.2), Nol11(-0.21), Cirh1a(-0.22), Mphosph10(-0.29), Nhp2l1(-0.33), Rps19(-0.4), Nob1(-0.43), Nob1(-0.43), Tsr3(-0.44), Rps28(-0.54),
nuclear exosome (RNase complex)	0.00176716	0.441905	5.78285e-11	1.35495e-09	16	0.00162839	0.00329621	0.00303021	0.000855589	0.00204345	Exosc10(0), Dis3l(-0.01), Exosc3(-0.04), Exosc3(-0.04), Dis3l2(-0.04), Mphosph6(-0.14), Exosc8(-0.19), Dis3(-0.22), Dis3(-0.22), Exosc9(-0.24), Exosc9(-0.24), Exosc1(-0.29), Exosc4(-0.44), Exosc2(-0.47), Exosc5(-0.48), Exosc7(-0.49),
protein transporter activity	0.00144689	0.218847	8.81211e-11	2.05113e-09	65	0.00613873	0.000311549	0.000197246	0.0195171	0.00312126	Ramp3(0.4), Calcr(0.32), Calcrl(0.32), Ap1s2(0.23), Cog3(0.14), Cog3(0.14), Tnpo1(0.13), Kpna4(0.11), Ap1g1(0.1), Ap4s1(0.09), Sec62(0.08), Xpo6(0.07), Ap2b1(0.05), Zfyve16(0.04), Rab4a(0.03), Cog2(0.02), Cog2(0.02), Ap1s3(0.02), Ap1b1(0.01), Ipo11(0.01), Rap1a(0.01), Ranbp6(0), Uso1(-0.01), Ap2a1(-0.02), Tnpo3(-0.02), Ap2a2(-0.03), Ipo8(-0.03), Kpna1(-0.04), Ramp2(-0.04), Rufy1(-0.04), Ipo9(-0.0…
DNA-(apurinic or apyrimidinic site) lyase activity	0.00170139	0.469098	9.43219e-11	2.18112e-09	14	0.00307992	0.000984912	0.000290106	0.00179301	0.0198237	Hmga2(0.4), Hmga1(-0.07), Apex2(-0.07), Aplf(-0.1), Alkbh1(-0.18), Neil1(-0.26), Rps3(-0.32), Rps3(-0.32), Neil2(-0.32), Nthl1(-0.36), Nthl1(-0.36), Ogg1(-0.59), Apex1(-0.61), Apex1(-0.61),
peroxisomal membrane	0.000468097	0.265453	9.60308e-11	2.20621e-09	53	0.145426	0.0509082	0.00020697	4.34598e-06	0.000180199	Rab8b(0.29), Abcd2(0.24), Cav1(0.16), Hmgcr(0.15), Hmgcr(0.15), Pecr(0.15), Agps(0.14), Far1(0.07), Slc27a2(0.06), Pxmp2(0.04), Abcd1(0.01), Abcd1(0.01), Pex1(0), Dao(-0.02), Pex5(-0.02), Pex5(-0.02), Arf1(-0.04), Pnpla8(-0.06), Acsl1(-0.07), Map2k2(-0.08), Pex3(-0.09), Abcd3(-0.11), Abcd3(-0.11), Pex6(-0.11), Pex11b(-0.12), Pex11b(-0.12), Mgst1(-0.12), Pex13(-0.12), Pex13(-0.12), Pex19(-0.14), A…
uracil DNA N-glycosylase activity	0.00140901	0.412743	1.30591e-10	2.98084e-09	18	0.00252356	0.00583405	0.00129963	0.000310521	0.00883117	Ccno(0.69), Mbd4(0.2), Tdg(0.07), Mutyh(0), Smug1(-0.13), Smug1(-0.13), Smug1(-0.13), Smug1(-0.13), Macrod2(-0.14), Neil1(-0.26), Macrod1(-0.27), Neil2(-0.32), Nthl1(-0.36), Ung(-0.58), Ung(-0.58), Ung(-0.58), Ogg1(-0.59), Dnph1(-0.7),
protein neddylation	0.00102846	0.423033	1.32345e-10	3.00151e-09	18	0.00951438	0.00121064	0.000368466	0.0290377	0.000251381	Dcun1d3(0.13), Nae1(-0.05), Nae1(-0.05), Rnf7(-0.06), Rnf7(-0.06), Dcun1d1(-0.08), Uba3(-0.09), Ube2f(-0.09), Ube2f(-0.09), Rbx1(-0.15), Dcun1d5(-0.21), Nedd8(-0.24), Nedd8(-0.24), Nedd8(-0.24), Ube2m(-0.24), Ube2m(-0.24), Dcun1d2(-0.24), Dcun1d4(-0.26),
BLOC-1 complex	0.00117134	0.380932	1.49623e-10	3.37175e-09	22	0.121229	0.00164702	9.23638e-05	0.000902715	0.00091013	Pi4k2a(0.08), Stx12(0.04), A230046K03Rik(-0.05), Wash1(-0.1), Bloc1s4(-0.11), Bloc1s4(-0.11), Bloc1s6(-0.12), Bloc1s6(-0.12), Kxd1(-0.12), Snapin(-0.17), Snapin(-0.17), Dtnbp1(-0.18), Dtnbp1(-0.18), Bloc1s3(-0.2), Bloc1s3(-0.2), Bloc1s1(-0.22), Bloc1s1(-0.22), Snap47(-0.22), Bloc1s2(-0.24), Bloc1s2(-0.24), Bloc1s5(-0.3), Bloc1s5(-0.3),
ribosomal large subunit assembly	0.00125829	0.423402	1.72843e-10	3.87036e-09	17	0.0141845	0.000419966	0.0119375	0.00239102	0.000309272	Rpl24(0.13), Rpl3l(0.09), Rpl10(0.01), Rpl11(-0.09), Mdn1(-0.09), Rpl5(-0.15), Rsl24d1(-0.2), Rpl3(-0.23), Mrpl20(-0.23), Rpf1(-0.26), Rpl6(-0.28), Mrpl11(-0.28), Brix1(-0.33), Rpf2(-0.44), Rpl12(-0.47), Mrto4(-0.53), Ppan(-0.61),
endoplasmic reticulum membrane	0.00147509	0.112379	2.31561e-10	5.1526e-09	246	0.0168546	0.00328541	0.00356722	0.000578567	0.00081057	Ch25h(0.76), Iigp1(0.76), Nat8l(0.72), Moxd1(0.64), Itpr3(0.62), Itpr3(0.62), Ttc9(0.58), Tmtc2(0.47), Lpin2(0.41), Hpd(0.39), Ero1lb(0.39), Soat2(0.39), Soat2(0.39), Tmem173(0.37), Tmem173(0.37), Plpp3(0.36), Jph1(0.32), Pign(0.31), Nat8f1(0.31), Ndrg4(0.31), Pkd2(0.3), Itpr2(0.26), Itpr2(0.26), Rtn4(0.25), Rhbdf2(0.25), Bcl2(0.24), Eif2ak3(0.24), Reep1(0.23), Tmem67(0.23), Tmem67(0.23), F830016…
U2 snRNP	0.00214828	0.350927	3.49188e-10	7.72143e-09	24	0.0151728	0.000304149	0.013084	0.00103323	0.00192036	Sf3b1(0.29), Sf3b1(0.29), Htatsf1(-0.01), Sf3b2(-0.02), Snrpb2(-0.04), Snrpb2(-0.04), Ccdc97(-0.05), Rbmx2(-0.06), Sf3a1(-0.07), Snrpn(-0.13), Snrpn(-0.13), Snrpe(-0.14), Snrpb(-0.17), Snrpb(-0.17), Sf3a2(-0.18), Snrpd3(-0.23), Snrpa1(-0.25), Phf5a(-0.26), Phf5a(-0.26), Sf3b6(-0.29), Sf3b5(-0.31), Snrpg(-0.33), Snrpd1(-0.35), Snrpd2(-0.38),
nuclear chromosome, telomeric region	0.00185553	0.162282	4.271e-10	9.3856e-09	113	0.000749622	0.000243822	0.00128353	0.00415999	0.0806394	Pml(0.32), Sun2(0.31), Sun2(0.31), Ercc1(0.29), Atrx(0.29), Orc1(0.24), Tnks(0.23), Hmbox1(0.21), Hmbox1(0.21), Dclre1c(0.19), Trp53bp1(0.17), Kdm1a(0.17), Fen1(0.16), Smchd1(0.16), Thoc2(0.16), H3f3b(0.15), Ppp1r10(0.15), Wdr82(0.13), Lrif1(0.13), Tinf2(0.12), Tinf2(0.12), Cdc73(0.12), Ercc4(0.07), Slx4(0.06), Cbx5(0.05), Cbx5(0.05), Pot1b(0.05), Upf1(0.04), Ten1(0.04), Ten1(0.04), Mcm4(0.03), D…
chromosome	0.00199932	0.106892	5.95552e-10	1.30066e-08	260	0.00108813	0.00186176	0.0010051	0.00526277	0.0235181	Sycp1(1.01), Bub1b(0.69), Sycp2(0.68), Sycp3(0.52), Rassf2(0.47), Il33(0.42), Cenpa(0.38), Setd2(0.37), Setd7(0.35), Setx(0.34), Birc5(0.33), Brd4(0.33), Ash1l(0.32), Atrx(0.29), Cenpl(0.29), Ndel1(0.29), Ss18l1(0.28), Bod1l(0.27), Spag5(0.26), Kansl1(0.26), Tnks1bp1(0.26), Clasp2(0.25), Nsd1(0.24), Loxl2(0.24), Whsc1l1(0.24), Tnks(0.23), Mbd5(0.23), Fbxo11(0.23), Tpr(0.22), Kmt5b(0.22), Cenpc1(0…
RNA polymerase I activity	0.00230576	0.490739	6.08418e-10	1.3206e-08	12	0.0738525	0.00112382	0.000762623	0.00184809	0.00128518	Znrd1(-0.02), Polr2k(-0.08), Polr2l(-0.1), Polr1d(-0.13), Twistnb(-0.23), Polr2h(-0.23), Polr1a(-0.33), Polr1c(-0.34), Polr2e(-0.43), Polr2f(-0.45), Polr1b(-0.59), Polr1e(-0.66),
RNA modification	0.00229322	0.454097	6.30027e-10	1.35917e-08	14	0.00264799	0.00327709	0.000284293	0.00506915	0.0199913	Rpusd1(0.03), Cdk5rap1(0.02), Adat3(-0.02), Pus7l(-0.13), Pus10(-0.16), Rpusd4(-0.17), Cdkal1(-0.22), Trub2(-0.3), Rpusd2(-0.31), Pus1(-0.44), Trub1(-0.49), Pusl1(-0.51), Rpusd3(-0.52), Dkc1(-0.64),
cellular amino acid biosynthetic process	0.00216641	0.34608	7.53427e-10	1.61553e-08	24	0.0454076	0.000990371	0.0549174	9.52919e-05	0.000337385	Mtr(0.28), Cbs(0.27), Asl(0.08), Ass1(0.05), Mthfd2l(0.04), Bcat2(0.01), Got1(-0.02), Mthfd1(-0.07), Apip(-0.15), Pycr2(-0.15), Psph(-0.23), Pycrl(-0.29), Enoph1(-0.29), Adi1(-0.33), Cth(-0.34), Asnsd1(-0.35), Bcat1(-0.39), Psat1(-0.44), Mtrr(-0.46), Mri1(-0.5), Asns(-0.6), Aldh18a1(-0.61), Phgdh(-0.68), Pycr1(-1.01),
ER to Golgi vesicle-mediated transport	0.00228433	0.201883	7.60262e-10	1.62036e-08	79	0.066238	0.00812225	0.000349343	0.000444215	0.00193132	Ank1(0.73), Nrbp2(0.3), Creb3l2(0.28), Sec24a(0.25), Stx5a(0.18), Stx5a(0.18), Whamm(0.17), Whamm(0.17), Golga2(0.16), Htt(0.15), Cul3(0.14), Cog3(0.14), Cog3(0.14), Gosr2(0.11), Copb2(0.09), Stx17(0.07), Copa(0.06), Rab1a(0.06), Rab1a(0.06), Rab1a(0.06), Sec23a(0.05), Tbc1d20(0.05), Tbc1d20(0.05), Ier3ip1(0.04), Rab35(0.04), Sec23ip(0.04), Klhl12(0.04), Sec23b(0.03), Gosr1(0.03), Gosr1(0.03), Tr…
Elongator holoenzyme complex	0.00293028	0.533497	7.83632e-10	1.66017e-08	10	0.00173343	0.0124051	0.00307348	0.00269738	0.00247596	Elp5(-0.11), Elp4(-0.15), Elp4(-0.15), Elp2(-0.19), Elp2(-0.19), Ikbkap(-0.19), Elp6(-0.26), Elp6(-0.26), Elp3(-0.35), Elp3(-0.35),
base-excision repair	0.00207404	0.269843	8.37981e-10	1.76475e-08	40	0.00437236	0.00843574	0.000150814	0.000435236	0.0641382	Ccno(0.69), Hmga2(0.4), Usp47(0.29), Usp47(0.29), Ercc6(0.23), Huwe1(0.17), Tdg(0.07), Tdg(0.07), Mutyh(0), Wrn(-0.04), Wrn(-0.04), Hmgb1(-0.05), Hmga1(-0.07), Apex2(-0.07), Rpa1(-0.08), Parp2(-0.09), Smug1(-0.13), Smug1(-0.13), Rpa2(-0.14), Xpa(-0.14), Mpg(-0.14), Polb(-0.19), Polb(-0.19), Xrcc1(-0.19), Xrcc1(-0.19), Sirt6(-0.22), Neil1(-0.26), Lig1(-0.27), Neil2(-0.32), Parp1(-0.34), Rpa3(-0.35…
mitochondrial respiratory chain complex IV assembly	0.00275276	0.467757	8.50485e-10	1.78048e-08	13	0.0133801	0.00578837	0.0015202	0.00294282	0.00129465	Cox17(0.25), Pet100(-0.06), Sco1(-0.18), Surf1(-0.19), Timm21(-0.19), Timm21(-0.19), Cox19(-0.21), Cox14(-0.27), Cox20(-0.28), Bcs1l(-0.47), Coa3(-0.51), Coa3(-0.51), Coa4(-0.69),
endopeptidase activity	0.00282635	0.179566	9.53015e-10	1.98339e-08	89	0.00530891	0.00751626	0.00589612	0.00300524	0.000744454	Adamts9(0.74), Mmp3(0.65), Htra4(0.6), Mmp9(0.59), Adamts15(0.4), Ece1(0.37), Cd46(0.3), Ren1(0.28), Ren1(0.28), Pappa(0.19), Fam76b(0.18), Ctsd(0.17), Pcsk5(0.17), Bace1(0.17), Furin(0.15), Klk1(0.12), Senp1(0.1), Mme(0.09), Senp5(0.09), Adamts3(0.08), Fam76a(0.07), Ncstn(0.05), Pcsk6(0.04), Casp6(0.03), Casp6(0.03), Klk1b5(0.03), Adam10(0.01), Mbtps1(0.01), Capn7(-0.02), Casp1(-0.02), Psen1(-0.…
tricarboxylic acid cycle	0.00167983	0.343291	1.245e-09	2.5759e-08	29	0.117718	0.034676	0.000695865	4.98936e-05	0.000594256	Dhtkd1(0.31), Sdha(0.09), Ogdh(0.08), Ogdh(0.08), Mdh1(0.01), Pdha1(-0.02), Aco2(-0.03), Sucla2(-0.03), Aco1(-0.04), Idh2(-0.04), Fh1(-0.07), Fh1(-0.07), Pdhb(-0.07), Idh1(-0.08), Dlst(-0.08), Cs(-0.09), Idh3g(-0.09), Mdh2(-0.09), Idh3b(-0.12), Suclg2(-0.13), Dlat(-0.13), Sdhb(-0.14), Sdhc(-0.15), Ogdhl(-0.15), Suclg1(-0.19), Suclg1(-0.19), Sdhd(-0.21), Sdhd(-0.21), Idh3a(-0.33),
holo TFIIH complex	0.00290308	0.418186	1.33491e-09	2.74588e-08	16	0.0241073	0.00688442	0.00131922	0.00253421	0.00111472	Ercc5(0.2), Gtf2h2(-0.02), Ercc2(-0.04), Ercc3(-0.11), Gtf2h1(-0.12), Gtf2h1(-0.12), Psmc5(-0.16), Mnat1(-0.19), Mnat1(-0.19), Ccnh(-0.2), Gtf2f2(-0.22), Cdk7(-0.23), Gtf2h3(-0.31), Gtf2h3(-0.31), Gtf2h4(-0.32), Gtf2h4(-0.32),
nucleotide-excision repair	0.00284226	0.261446	1.37126e-09	2.80434e-08	41	0.00671634	0.00453445	0.00263313	0.000680869	0.0131449	Ercc1(0.29), Ercc1(0.29), Ercc5(0.2), Rbbp8(0.08), Ercc4(0.07), Slx4(0.06), Oraov1(0.06), Dclre1a(0.03), Brca2(0.02), Gtf2h2(-0.02), Ercc2(-0.04), Ercc2(-0.04), Xpc(-0.07), Xpc(-0.07), Xpc(-0.07), Cetn2(-0.07), Rad51d(-0.08), Rpa1(-0.08), Ddb1(-0.1), Ercc3(-0.11), Ercc8(-0.11), Gtf2h1(-0.12), Rpa2(-0.14), Xpa(-0.14), Hus1(-0.17), Fan1(-0.17), Gtf2h5(-0.19), Gtf2h5(-0.19), Dclre1b(-0.19), Fancc(-0…
NADH dehydrogenase (ubiquinone) activity	0.00163	0.327755	1.55316e-09	3.15808e-08	31	0.0519409	0.00254176	0.0164072	0.0019957	6.96333e-05	AA467197(0.68), ND5(0.09), ND1(0.06), ND2(0.05), ND6(0.03), ND4(0.02), Ndufa5(-0.03), Ndufs1(-0.04), Ndufa4(-0.05), Ndufs2(-0.06), Ndufv1(-0.08), Ndufb9(-0.09), Ndufc2(-0.09), Ndufs4(-0.1), Ndufs4(-0.1), Ndufs3(-0.11), Ndufa2(-0.12), Ndufa10(-0.12), Ndufa4l2(-0.13), Ndufb7(-0.15), Ndufa13(-0.15), Ndufv2(-0.16), Ndufv2(-0.16), Ndufa12(-0.17), Ndufs8(-0.2), Ndufb8(-0.22), Ndufa8(-0.23), Ndufaf2(-0.…
intracellular protein transport	0.0032375	0.118634	1.61088e-09	3.25675e-08	218	0.0123034	0.00547304	0.000250198	0.00461807	0.00909847	Drd1(0.69), Stx1b(0.69), Stx11(0.68), Myrip(0.5), Tbc1d9(0.48), Ankrd50(0.45), Sytl5(0.45), Ramp3(0.4), Grk3(0.4), Hid1(0.39), Hid1(0.39), Grasp(0.35), Stx1a(0.34), Sytl2(0.34), Snx18(0.32), Sgsm1(0.31), Scg5(0.3), Ap3b2(0.28), Grtp1(0.27), Klc1(0.25), Sec24a(0.25), Ap1s2(0.23), Evi5l(0.23), Snx33(0.23), Tbc1d2b(0.22), Cltc(0.22), Gpihbp1(0.21), Apba1(0.2), Kif13a(0.18), Stx5a(0.18), Tom1l2(0.18)…
protein import into mitochondrial matrix	0.00275211	0.40451	1.66105e-09	3.33909e-08	17	0.0139891	0.00735525	0.000593424	0.000639669	0.0167369	Grpel2(0.05), Tomm7(-0.04), Pam16(-0.06), Pam16(-0.06), Timm17b(-0.14), Timm17a(-0.15), Timm23(-0.18), Timm44(-0.19), Timm21(-0.19), Timm21(-0.19), Tomm22(-0.23), Grpel1(-0.24), Dnlz(-0.24), Tomm40l(-0.28), Tomm20(-0.31), Tomm40(-0.38), Timm50(-0.38),
translation elongation factor activity	0.00323833	0.371824	1.77185e-09	3.5417e-08	20	0.0407169	0.00427099	0.00342597	0.000131354	0.00663578	Gtpbp2(0.12), Abtb1(0.06), Gtpbp1(0.02), Eif5a2(0), Efl1(-0.02), Gfm1(-0.07), Gfm1(-0.07), Eef2(-0.1), Hbs1l(-0.12), Gfm2(-0.13), Tsfm(-0.18), Tufm(-0.21), Tufm(-0.21), Eef1a1(-0.23), Eefsec(-0.27), Eef1d(-0.29), Eef1g(-0.33), Eef1b2(-0.36), Eif5a(-0.43), Eef1e1(-0.63),
U12-type spliceosomal complex	0.00277069	0.284589	2.00953e-09	3.99422e-08	35	0.0147003	0.000515123	0.00910757	0.00202678	0.00694084	Sf3b1(0.29), Sf3b1(0.29), Rbm41(0.29), Pdcd7(0.15), Zrsr2(0.11), Rnpc3(0.06), Rnpc3(0.06), Snrnp25(0.05), Dhx15(0), Sf3b3(-0.02), Sf3b2(-0.02), Sf3b2(-0.02), Zcrb1(-0.04), Zcrb1(-0.04), Sf3b4(-0.04), Snrnp48(-0.05), Snrpf(-0.05), Ybx1(-0.08), Snrpb(-0.17), Snrnp35(-0.22), Snrnp35(-0.22), Snrpd3(-0.23), Snrpd3(-0.23), Phf5a(-0.26), Phf5a(-0.26), Sf3b6(-0.29), Sf3b6(-0.29), Sf3b5(-0.31), Sf3b5(-0.3…
catalytic activity	7.5753e-05	0.102139	2.12055e-09	4.19134e-08	414	0.379212	0.239	0.0166769	6.04144e-11	0.000190698	Sugct(1.29), Pak3(0.97), Hdc(0.84), Hk2(0.79), Ckm(0.78), Prkg1(0.72), Acsl6(0.72), Hsd3b2(0.68), Gys2(0.66), Moxd1(0.64), Tnfaip3(0.54), Sptlc3(0.54), Hk3(0.53), Pde10a(0.52), Sulf1(0.52), Lancl3(0.51), Hsd3b3(0.49), Acsm5(0.49), Zc3h12a(0.46), Aloxe3(0.45), Aadat(0.45), Etnppl(0.45), Amy1(0.44), Nmnat2(0.44), Upp2(0.41), Amacr(0.4), Pah(0.4), Azin2(0.4), Pld1(0.39), Glul(0.37), Hmgcll1(0.37), E…
ER membrane protein complex	0.00353271	0.400525	2.46098e-09	4.83719e-08	17	0.00187979	0.00202424	0.00765295	0.0201145	0.00231247	Emc1(0.01), Emc1(0.01), Emc9(-0.02), Mmgt1(-0.05), Mmgt1(-0.05), Emc2(-0.07), Emc7(-0.11), Emc7(-0.11), Emc3(-0.12), Emc3(-0.12), Emc8(-0.16), Emc10(-0.16), Emc10(-0.16), Emc4(-0.2), Mmgt2(-0.26), Emc6(-0.29), Emc6(-0.29),
RNA processing	0.00331175	0.203172	2.95352e-09	5.77323e-08	66	0.00530148	0.00214922	0.00391453	0.0040772	0.0108198	Ccnl1(0.53), Adarb1(0.32), Tmtc1(0.31), Prpf39(0.28), Wdhd1(0.26), Xrn1(0.22), Sfswap(0.17), Dicer1(0.16), Dicer1(0.16), Sugp2(0.14), Dhx57(0.1), Dhx36(0.09), Dhx9(0.08), Ythdc2(0.08), Sart3(0.07), Prpf6(0.06), Adar(0.05), Dhx40(0.04), Cstf3(0.04), Larp7(0.03), Wbp11(0.03), Larp6(0.02), Hnrnpk(0.01), Exosc10(0), Xab2(-0.01), Hnrnpul1(-0.01), U2surp(-0.02), Rtca(-0.06), Dhx35(-0.06), Dhx30(-0.06),…
nucleoside diphosphate kinase activity	0.00340683	0.399251	3.02168e-09	5.87401e-08	17	0.000849314	0.00364997	0.0167897	0.00371371	0.00864269	Ak4(0.32), Ak5(0.31), Pck1(0.05), Ak7(-0.06), Cmpk1(-0.13), Nme7(-0.18), Nme5(-0.22), Ak1(-0.23), Nme1(-0.34), Nme1(-0.34), Nme4(-0.39), Nme4(-0.39), Cmpk2(-0.4), Nme6(-0.4), Nme6(-0.4), Nme2(-0.41), Nme2(-0.41),
aerobic respiration	0.0020693	0.347197	3.05121e-09	5.89901e-08	24	0.23303	0.0105901	0.000602967	0.000742358	0.000191489	Sirt3(0.12), COX1(0.08), Pank2(0.03), Uqcrb(-0.04), Mtfr2(-0.06), Ndufv1(-0.08), Mtfr1(-0.09), Uqcrc1(-0.12), Uqcrc2(-0.13), Sdhb(-0.14), Mettl17(-0.16), Oxa1l(-0.16), Pmpcb(-0.16), Cat(-0.18), Cox11(-0.18), Uqcr10(-0.19), Mtfr1l(-0.2), Cox19(-0.21), Fxn(-0.22), Bloc1s1(-0.22), Cox10(-0.27), Cox20(-0.28), Chchd5(-0.3), Adsl(-0.39),
S-adenosylmethionine-dependent methyltransferase activity	0.00318004	0.343071	3.5061e-09	6.74162e-08	23	0.0265616	0.0118273	0.00299027	0.00145217	0.00124274	Mepce(0.08), Wbscr27(0.05), Tpmt(0.01), Pcmt1(-0.01), 2700097O09Rik(-0.01), Mettl7a2(-0.02), Nsun6(-0.03), Mettl7a1(-0.05), Suv39h1(-0.08), Coq5(-0.23), As3mt(-0.23), Armt1(-0.23), Armt1(-0.23), Lcmt2(-0.27), Gamt(-0.29), Rrp8(-0.3), Pemt(-0.31), Pemt(-0.31), Coq3(-0.35), Nsun5(-0.42), Nop2(-0.46), Prmt7(-0.56), Mettl7b(-0.81),
U1 snRNP	0.0035207	0.316132	3.90336e-09	7.46491e-08	27	0.00867641	0.00122011	0.0222281	0.00289082	0.00318213	Prpf39(0.28), Luc7l2(0.21), Luc7l3(0.07), Snrnp70(0.04), Snrnp70(0.04), Prpf40b(0.01), Luc7l(0.01), Prpf40a(0), Snrpf(-0.05), Snrpf(-0.05), Snrpn(-0.13), Snrpn(-0.13), Snrpe(-0.14), Snrpe(-0.14), Snrpc(-0.16), Snrpc(-0.16), Snrpb(-0.17), Snrpb(-0.17), Snrpd3(-0.23), Snrpd3(-0.23), Snrpa(-0.29), Snrpg(-0.33), Snrpg(-0.33), Snrpd1(-0.35), Snrpd1(-0.35), Snrpd2(-0.38), Snrpd2(-0.38),
proteasome assembly	0.00308361	0.422105	5.19242e-09	9.87677e-08	15	0.198936	0.00507036	0.00154097	0.000233744	0.00172019	Psmd11(0.03), Psmd11(0.03), Shfm1(-0.02), Pomp(-0.1), Pomp(-0.1), AI314180(-0.1), Adrm1(-0.13), Psmd13(-0.18), Psmd8(-0.23), Psmd4(-0.24), Psmd5(-0.3), Psmg1(-0.4), Psmg2(-0.48), Psmg2(-0.48), Psmg4(-0.5),
cristae formation	0.00420209	0.45082	5.3723e-09	1.01643e-07	13	0.0313287	0.0148146	0.00167895	0.00106205	0.00302389	Letm1(-0.03), Apool(-0.03), Afg3l1(-0.09), Immt(-0.11), Taz(-0.13), Chchd3(-0.14), Samm50(-0.15), Afg3l2(-0.15), Oma1(-0.21), 2410015M20Rik(-0.24), Uqcc3(-0.25), Chchd6(-0.3), Apoo(-0.37),
GPI anchor biosynthetic process	0.00324329	0.261083	5.77342e-09	1.08651e-07	39	0.000350421	0.00939084	0.0104095	0.00553314	0.0150525	Cwh43(0.33), Pign(0.31), Pgap1(0.17), Piga(0.13), Dpm1(0.1), Dpm1(0.1), Pigv(0.04), Pigv(0.04), Pigp(0.01), Pigh(-0.01), Pigm(-0.02), Pgap3(-0.03), Pigq(-0.07), Pigq(-0.07), Pigo(-0.08), Mppe1(-0.09), Pigw(-0.1), Pigs(-0.11), Gpaa1(-0.12), Pigb(-0.13), Pigb(-0.13), Pigc(-0.13), Pigg(-0.13), Pigg(-0.13), Pigk(-0.14), Pigt(-0.17), Pigu(-0.17), Pigf(-0.2), Pgap2(-0.2), Alg5(-0.23), Pyurf(-0.27), Pyu…
lysosomal membrane	0.00248745	0.151974	6.47503e-09	1.2121e-07	186	0.0921102	0.0348261	0.000314785	7.37671e-05	0.00913421	Egf(0.56), Ahnak(0.52), Lrp1(0.45), Acpp(0.44), Tm6sf1(0.41), Pld1(0.39), Laptm5(0.37), Ece1(0.37), Lnpep(0.33), Slc44a2(0.32), Slc15a3(0.31), Clcn6(0.29), Clcn6(0.29), Vasn(0.26), Atp11a(0.25), Tpcn2(0.25), Tpcn2(0.25), Hspa8(0.24), Gnb4(0.23), Npc1(0.23), Slc36a1(0.23), Lrp2(0.21), Enpp1(0.2), Dnajc5(0.18), Tecpr1(0.18), Tecpr1(0.18), Scarb1(0.17), Anxa6(0.16), Slc12a4(0.16), Litaf(0.16), Zfyve…
lyase activity	0.00172625	0.152916	6.80846e-09	1.26594e-07	117	0.0862706	0.0472193	0.0586955	1.50222e-05	4.40481e-05	Acod1(1.12), Hdc(0.84), Acmsd(0.61), Car3(0.52), Adcy1(0.48), Aloxe3(0.45), Etnppl(0.45), Glul(0.37), Hmgcll1(0.37), Car14(0.36), Adcy3(0.29), Car2(0.28), Adcy4(0.28), Cbs(0.27), Adcy9(0.19), Mvd(0.17), Gucy1a3(0.16), Car12(0.16), Npr2(0.16), Eno2(0.13), Pam(0.12), Aldob(0.12), Thnsl2(0.11), Npr1(0.1), Gucy1b3(0.1), Adcy5(0.1), Adcy6(0.09), Sgpl1(0.08), Asl(0.08), Fasn(0.07), Uroc1(0.06), Pck1(0.…
double-strand break repair	0.00278529	0.201119	6.83422e-09	1.26594e-07	67	0.00207353	0.00185517	0.00105377	0.0114202	0.0575163	Ggn(0.38), Setx(0.34), Ercc1(0.29), Marf1(0.24), Tdp2(0.22), Dclre1c(0.19), Baz1b(0.15), Rnf8(0.13), Smarca5(0.1), Ino80(0.08), Eya3(0.07), Uimc1(0.07), Uimc1(0.07), Eme2(0.06), Rad54l(0.05), Rad21(0.03), Brca2(0.02), Brca2(0.02), Rnf168(0.02), Kat5(0.02), Rad50(-0.02), Lig4(-0.03), Lig4(-0.03), Lig4(-0.03), Prkdc(-0.04), Prkdc(-0.04), Wrn(-0.04), Wrn(-0.04), Actr5(-0.04), Vcp(-0.04), Lig3(-0.06)…
heme biosynthetic process	0.00199062	0.330733	7.41426e-09	1.36623e-07	26	0.121029	0.0333397	0.00123117	2.24468e-05	0.00536002	Alas2(0.25), Ppox(0.1), Ppox(0.1), Slc11a2(0.03), Cpox(-0.01), Cpox(-0.01), Alad(-0.09), Alad(-0.09), Snx3(-0.13), Hnf1a(-0.14), Tmem14c(-0.15), Alas1(-0.16), Fech(-0.16), Fech(-0.16), Fech(-0.16), Fech(-0.16), Fxn(-0.22), Urod(-0.23), Atpif1(-0.24), Atpif1(-0.24), Uros(-0.24), Uros(-0.24), Iba57(-0.26), Cox10(-0.27), Slc25a39(-0.35), Hmbs(-0.42),
damaged DNA binding	0.00486128	0.215754	7.55612e-09	1.38516e-07	56	0.00640363	0.00622924	0.00544067	0.0019683	0.0125738	Cry2(0.44), Crebbp(0.4), Ep300(0.33), Ercc1(0.29), Ercc1(0.29), Trp63(0.27), Dclre1c(0.19), Trp53bp1(0.17), Msh6(0.11), Msh6(0.11), Rbbp8(0.08), Ercc4(0.07), Ercc4(0.07), Rev1(0.07), Dclre1a(0.03), Aptx(-0.02), Msh3(-0.05), Ddb2(-0.06), Xpc(-0.07), Xpc(-0.07), Nbn(-0.07), Cul4b(-0.07), Rpa1(-0.08), Polh(-0.08), Ddb1(-0.1), Ddb1(-0.1), Polk(-0.1), Pcna(-0.11), Msh2(-0.14), Rpa2(-0.14), Xpa(-0.14),…
mitochondrion organization	0.00270147	0.20103	7.96596e-09	1.45276e-07	67	0.14817	0.00498786	0.00309949	0.000432857	0.00160144	Epas1(0.48), P2rx7(0.32), Lrrk2(0.23), Man2a1(0.22), Rab3a(0.22), Cxadr(0.21), Atp7a(0.17), Nrf1(0.17), Cav2(0.16), Htt(0.15), Sepn1(0.15), Slc22a5(0.11), Slc25a36(0.11), Ppargc1a(0.09), Vps13c(0.09), Pink1(0.06), Sesn2(0.05), Sod2(0.02), Mief2(0.02), Pex5(-0.02), Slc25a33(-0.02), Rhot2(-0.02), Dctn6(-0.05), Lig3(-0.06), Mtfr2(-0.06), Chchd2(-0.07), Agtpbp1(-0.07), Opa1(-0.07), Opa1(-0.07), Opa1(…
precatalytic spliceosome	0.00492346	0.321413	9.11591e-09	1.65395e-07	25	0.027664	0.00147615	0.0143705	0.00139074	0.00590636	Son(0.3), Prpf38b(0.19), Aggf1(0.07), Snrnp70(0.04), Sf3b2(-0.02), Lsm3(-0.06), Rbmx2(-0.06), Crnkl1(-0.07), Prpf38a(-0.08), Bcas2(-0.1), Plrg1(-0.11), Snrnp40(-0.13), Snrpe(-0.14), Snrnp27(-0.15), Snrnp35(-0.22), Snrpd3(-0.23), Prpf31(-0.24), Phf5a(-0.26), Sf3b6(-0.29), Sf3b5(-0.31), Nhp2l1(-0.33), Snrpg(-0.33), Snrpd1(-0.35), Lsm2(-0.38), Snrpd2(-0.38),
mitochondrial proton-transporting ATP synthase complex, coupling factor F(o)	0.00250773	0.504232	1.05273e-08	1.90029e-07	12	0.0281724	0.00826392	0.0232486	0.00159806	0.000510914	Atp5j(-0.02), Atp5h(-0.08), Atp5g3(-0.11), Atp5j2(-0.13), Atp5o(-0.14), Atp5f1(-0.15), Atp5f1(-0.15), Atp5k(-0.15), Atp5l(-0.2), Atp5g1(-0.29), Atp5g1(-0.29), Atp5g2(-0.65),
4 iron, 4 sulfur cluster binding	0.0019004	0.266273	1.07223e-08	1.92567e-07	40	0.0783441	0.0164444	0.000438942	2.88209e-05	0.0523143	Rev3l(0.19), Brip1(0.1), Dpyd(0.09), Rsad2(0.06), Mocs1(0.03), Ireb2(0.03), Cdk5rap1(0.02), Pola1(0), Mutyh(0), Aco2(-0.03), Aco1(-0.04), Ercc2(-0.04), Ndufs1(-0.04), Iscu(-0.05), Isca1(-0.05), Ndufs2(-0.06), Ndufv1(-0.08), Pole(-0.09), Lias(-0.1), Rtel1(-0.1), Etfdh(-0.11), Prim2(-0.12), Sdhb(-0.14), Ddx11(-0.18), Exo5(-0.19), Exo5(-0.19), Ndufs8(-0.2), Narfl(-0.22), Cdkal1(-0.22), Isca2(-0.22),…
centrosome	0.00160109	0.0858474	1.16861e-08	2.08816e-07	466	0.00492612	0.0204113	0.00106105	0.00108435	0.0424072	Crocc(0.74), Plk2(0.7), Pde4b(0.68), Kif23(0.66), Plk3(0.58), Cep170(0.51), Tfap2a(0.49), Cep250(0.43), Mtap7d3(0.42), Smad7(0.41), Pcnt(0.41), Pcnt(0.41), Stil(0.39), Iqcb1(0.37), Brsk1(0.37), Cntrl(0.36), Apc(0.35), Rock2(0.34), Rock2(0.34), Ubr4(0.33), Pde4d(0.33), Id1(0.32), Arhgef10(0.32), Ppp1r12a(0.29), Ccsap(0.29), Ndel1(0.29), Ndel1(0.29), Akap9(0.29), Akap9(0.29), Stk26(0.28), Tchp(0.28…
Ada2/Gcn5/Ada3 transcription activator complex	0.00480434	0.333479	1.36467e-08	2.42623e-07	23	0.00381118	0.00498568	0.00209209	0.0195271	0.0120582	Kat2b(0.12), Kat2b(0.12), Hcfc1(0.07), Mbip(0.02), Mbip(0.02), Zzz3(0), Tada3(-0.03), Tada3(-0.03), Dr1(-0.14), Dr1(-0.14), Pole4(-0.14), Yeats2(-0.15), Yeats2(-0.15), Wdr5(-0.19), Wdr5(-0.19), Csrp2bp(-0.2), Csrp2bp(-0.2), Pole3(-0.24), Tada2a(-0.24), Sgf29(-0.32), Sgf29(-0.32), Kat2a(-0.48), Kat2a(-0.48),
cell division	0.00295679	0.0951067	1.3868e-08	2.45325e-07	319	0.0229511	0.00218564	0.000118259	0.0377578	0.0169349	Sycp1(1.01), Bub1b(0.69), Ccno(0.69), Sycp2(0.68), Kif23(0.66), Fam83d(0.65), Cit(0.6), Ccng2(0.55), Sycp3(0.52), Hmga2(0.4), Cntrl(0.36), Birc5(0.33), Tacc1(0.33), Snx18(0.32), Ccnd2(0.29), Ccsap(0.29), Phf13(0.29), Sept5(0.28), Pard6g(0.28), Cdk14(0.27), Lats2(0.26), Spag5(0.26), Clasp2(0.25), Ccnt1(0.24), Ttc28(0.24), Aspm(0.23), Tnks(0.23), Snx33(0.23), Klhl21(0.23), Birc6(0.22), E4f1(0.22), …
exosome (RNase complex)	0.0064888	0.436889	2.11161e-08	3.71686e-07	13	0.0177963	0.0112564	0.00448913	0.00260491	0.00681913	Exosc10(0), Dis3l(-0.01), Exosc3(-0.04), Skiv2l2(-0.06), Mphosph6(-0.14), Exosc8(-0.19), Dis3(-0.22), Exosc9(-0.24), Exosc1(-0.29), Exosc4(-0.44), Exosc2(-0.47), Exosc5(-0.48), Exosc7(-0.49),
RNA catabolic process	0.0065144	0.45277	2.64602e-08	4.63446e-07	12	0.0236649	0.000837347	0.00418058	0.0205365	0.00911087	Skiv2l2(-0.06), Isg20(-0.08), Oas2(-0.12), Snd1(-0.14), Pnpt1(-0.17), Exosc8(-0.19), Supv3l1(-0.29), Rnaseh2b(-0.32), Rnaseh2c(-0.38), Rnaseh2c(-0.38), Rnaseh2a(-0.42), Exosc5(-0.48),
dolichyl-diphosphooligosaccharide-protein glycotransferase activity	0.00542608	0.507243	2.73146e-08	4.76055e-07	10	0.00168112	0.00360895	0.00242612	0.0226409	0.0430445	Stt3a(-0.06), Stt3a(-0.06), Rpn2(-0.08), Magt1(-0.09), Stt3b(-0.09), Stt3b(-0.09), Dad1(-0.13), Rpn1(-0.16), Ddost(-0.2), Krtcap2(-0.35),
mitochondrial outer membrane	0.00499577	0.139093	2.87199e-08	4.98093e-07	129	0.0127528	0.0367973	0.0102794	0.000431883	0.00687077	Cpt1b(0.79), Hk2(0.79), Acsl6(0.72), Gja1(0.63), Arg1(0.57), Ppp1r15a(0.45), Tmem173(0.37), Gimap5(0.37), Lpin1(0.3), Epha4(0.29), Hk1(0.29), Ddx3x(0.26), Mlxip(0.26), Bcl2(0.24), Bcl2(0.24), Lrrk2(0.23), Kmo(0.22), Mcl1(0.21), Ppp2r2b(0.21), Acsl4(0.19), Bcl2l2(0.17), Rab11fip5(0.15), Slc44a1(0.13), Gimap3(0.12), Mtor(0.09), Vps13c(0.09), Asl(0.08), Cnp(0.07), Cpt1a(0.07), Bcl2l1(0.06), Bcl2l1(0…
mitochondrial outer membrane translocase complex	0.00595675	0.494544	3.32554e-08	5.7394e-07	10	0.0463025	0.0191936	0.0128698	0.00117559	0.00114019	Pink1(0.06), Tomm7(-0.04), Tomm7(-0.04), Tomm22(-0.23), Tomm22(-0.23), Tomm40l(-0.28), Tomm20(-0.31), Tomm40(-0.38), Tomm40(-0.38), Tomm5(-0.78),
RNA polymerase III activity	0.00583965	0.368857	3.41195e-08	5.85993e-07	18	0.114136	0.00179648	0.00907315	0.00138782	0.00473761	Polr3a(0.08), Polr3f(0.05), Crcp(-0.07), Polr2k(-0.08), Polr2l(-0.1), Polr3gl(-0.11), Polr3b(-0.11), Polr1d(-0.13), Polr3k(-0.14), Polr3c(-0.17), Polr3d(-0.19), Polr3e(-0.22), Polr2h(-0.23), Polr1c(-0.34), Polr3h(-0.37), Polr2e(-0.43), Polr2f(-0.45), Polr3g(-0.74),
proton-transporting ATP synthase activity, rotational mechanism	0.00425439	0.480342	3.79392e-08	6.48449e-07	12	0.0496911	0.00937111	0.0128151	0.00725344	0.000407158	Atp5b(-0.05), Atp5a1(-0.06), Atp5h(-0.08), Atp6ap1(-0.09), Atp5g3(-0.11), Atp5e(-0.12), Atp5c1(-0.14), Atp5o(-0.14), Atp5f1(-0.15), Atp5d(-0.17), Atp5g1(-0.29), Atp5g2(-0.65),
translational elongation	0.00796927	0.373259	6.03782e-08	1.02701e-06	17	0.0477865	0.00465036	0.0112494	0.00146215	0.0104685	Abtb1(0.06), Gtpbp1(0.02), Eif5a2(0), Efl1(-0.02), Gfm1(-0.07), Eef2(-0.1), Hbs1l(-0.12), Tsfm(-0.18), Tufm(-0.21), Eef1a1(-0.23), Rplp2(-0.23), Eef2k(-0.27), Rplp1(-0.28), Eef1d(-0.29), Eef1g(-0.33), Eef1b2(-0.36), Eif5a(-0.43),
mitochondrial respiratory chain complex III	0.00456024	0.536569	6.60355e-08	1.11786e-06	10	0.0639205	0.0256507	0.00557583	0.00562496	0.000570948	Uqcrb(-0.04), Uqcrh(-0.11), Uqcrc1(-0.12), Uqcrc1(-0.12), Uqcrc2(-0.13), Uqcrc2(-0.13), Uqcrfs1(-0.14), Pmpcb(-0.16), Uqcr10(-0.19), Uqcc3(-0.25),
ATP-dependent RNA helicase activity	0.00554487	0.204559	7.0601e-08	1.18946e-06	61	0.0618195	0.00271099	0.00815935	0.0018544	0.0159444	Ddx6(0.34), Ddx3x(0.26), Ddx3x(0.26), Ddx5(0.26), Ddx5(0.26), Snrnp200(0.23), Ddx3y(0.18), Ddx19b(0.16), Dhx38(0.12), Ddx42(0.1), Dhx57(0.1), Ddx17(0.09), Dhx36(0.09), Dhx9(0.08), Ddx50(0.08), Dhx8(0.08), Ythdc2(0.08), Upf1(0.04), Dhx40(0.04), Ddx59(0.03), Dhx15(0), Ddx23(0), Dhx16(-0.02), Dhx35(-0.06), Dhx30(-0.06), Dhx29(-0.06), Helb(-0.07), Ddx19a(-0.08), Ddx47(-0.08), Ddx52(-0.08), Ddx39(-0.0…
endoplasmic reticulum lumen	0.00652863	0.21185	7.12431e-08	1.19459e-06	53	0.0488733	0.0129989	0.00610223	0.00223108	0.00563162	Txndc16(0.19), Hspa5(0.17), Edem3(0.14), Calu(0.12), Gbf1(0.11), Tmem43(0.09), Slc27a2(0.06), Slc27a2(0.06), Hsp90b1(0.05), Dnajc10(0.05), Os9(0.05), Os9(0.05), Dnajc1(0.03), Uggt1(0.01), Rdh5(0), Tor3a(-0.01), Tor3a(-0.01), Dnajc3(-0.02), Txndc12(-0.04), Tor1b(-0.05), Tor1b(-0.05), Pdia6(-0.05), Ces1d(-0.05), Rnaset2a(-0.05), Erp44(-0.06), Txndc5(-0.06), Erlec1(-0.07), Erlec1(-0.07), Rnaset2b(-0…
electron carrier activity	0.00312037	0.23353	7.35002e-08	1.22662e-06	50	0.124154	0.079865	0.0130657	0.000134516	0.000441674	Sh3bgrl3(0.3), Glrx(0.26), Acox3(0.19), Xdh(0.16), Acad10(0.15), Cox7a1(0.1), Acadsb(0.1), Acadsb(0.1), Sdha(0.09), COX1(0.08), CYTB(0.08), Por(0.08), Ivd(0.06), Ndufs1(-0.04), Acadl(-0.05), Gcdh(-0.06), Cox7a2(-0.07), Fdx1(-0.07), Acadvl(-0.08), Etfa(-0.08), Etfa(-0.08), Acad11(-0.09), Cycs(-0.11), Cox7a2l(-0.11), Etfdh(-0.11), Acadm(-0.13), Sdhb(-0.14), Sdhc(-0.15), Uqcr11(-0.15), Glrx2(-0.15),…
Cajal body	0.00740382	0.263129	7.75606e-08	1.28831e-06	34	0.0497445	0.00883136	0.00437757	0.014879	0.00176973	Hinfp(0.29), Uspl1(0.2), Ell(0.17), Ice1(0.11), Npat(0.1), Prpf3(0.08), Sart3(0.07), Sart3(0.07), Sart1(0.06), Angel2(0.05), Cdk2(0), Toe1(-0.03), Ice2(-0.04), Prpf4(-0.07), Isg20(-0.08), Wrap53(-0.1), Eftud2(-0.12), Prpf31(-0.24), Smn1(-0.25), Smn1(-0.25), Zpr1(-0.25), Zpr1(-0.25), Lsg1(-0.27), Coil(-0.3), Coil(-0.3), Lsm10(-0.31), Nop58(-0.32), Fbl(-0.36), Fbl(-0.36), Nolc1(-0.37), Zc3h8(-0.38)…
ER-associated ubiquitin-dependent protein catabolic process	0.00658773	0.206616	8.7568e-08	1.44774e-06	65	0.185952	0.0115353	0.00150614	0.00238047	0.0031986	Fbxo2(0.43), Derl3(0.38), Nrros(0.35), Tmem67(0.23), Rnf103(0.21), Yod1(0.21), Edem1(0.2), Edem3(0.14), Erlin1(0.13), Dnajb9(0.08), Dnajb9(0.08), Rnf121(0.08), Usp19(0.07), Usp19(0.07), Ubqln2(0.06), Rnf185(0.06), Hsp90b1(0.05), Dnajc10(0.05), Dnajc10(0.05), Os9(0.05), Os9(0.05), Trim13(0.04), Vimp(0.04), Ubxn4(0.02), Syvn1(0.02), Syvn1(0.02), Ube2j1(0), Ube2j1(0), Ube2g2(-0.01), Ube2g2(-0.01), W…
condensed chromosome	0.00807516	0.288615	8.93079e-08	1.46963e-06	28	0.00219407	0.0261605	0.00158069	0.0340831	0.0175077	Sycp3(0.52), Baz1b(0.15), Smarca5(0.1), Akap8(0.08), Akap8(0.08), Cdk2(0), Ctcf(-0.01), Lig4(-0.03), Ncapd3(-0.05), Rpa1(-0.08), H2afy(-0.09), Top3b(-0.12), Mki67(-0.13), Mlh1(-0.18), Mlh1(-0.18), Rad51(-0.21), Hmgb2(-0.22), Champ1(-0.22), Smc2(-0.23), Smc2(-0.23), Top2a(-0.29), Ncapd2(-0.29), Ncapd2(-0.29), Mlh3(-0.38), Pes1(-0.39), Hmbs(-0.42), Banf1(-0.45), Brca1(-0.77),
nuclear mRNA surveillance	0.00889143	0.481437	9.37507e-08	1.5356e-06	10	0.0124946	0.00906916	0.00578073	0.0219986	0.00605125	Xrn1(0.22), Exosc10(0), Dxo(-0.13), Exosc8(-0.19), Exosc9(-0.24), Exosc9(-0.24), Exosc4(-0.44), Exosc4(-0.44), Exosc5(-0.48), Exosc7(-0.49),
proteasome regulatory particle	0.00599589	0.51159	9.60236e-08	1.56558e-06	10	0.243452	0.0120893	0.0031793	0.000504402	0.00371809	Psmd11(0.03), Psmd2(-0.09), Psmd3(-0.1), Psmd6(-0.1), Psmc1(-0.12), Psmc5(-0.16), Psmd12(-0.17), Psmd13(-0.18), Psmd7(-0.21), Psmd8(-0.23),
fatty acid beta-oxidation	0.00104378	0.279234	1.04825e-07	1.70124e-06	46	0.621602	0.104839	0.0118282	1.35058e-05	1.32432e-05	Abcd2(0.24), Abcd2(0.24), Acox3(0.19), Ppard(0.16), Slc27a2(0.06), Sesn2(0.05), Acaa2(0.04), Acaa2(0.04), Eci3(0.04), Abcd1(0.01), Abcd1(0.01), Crot(0.01), Acaa1a(0.01), Acaa1a(0.01), Bdh2(-0.01), Pex5(-0.02), Acat2(-0.05), Ehhadh(-0.07), Ehhadh(-0.07), Acadvl(-0.08), Auh(-0.09), Pex7(-0.1), Hadha(-0.1), Hadha(-0.1), Acat1(-0.1), Abcd3(-0.11), Acadm(-0.13), Echs1(-0.13), Echs1(-0.13), Eci2(-0.14)…
ubiquitin conjugating enzyme activity	0.0061688	0.240456	1.08899e-07	1.75929e-06	42	0.0497906	0.0241683	0.000295543	0.029732	0.00403791	Ube2ql1(0.27), Birc6(0.22), Ube2z(0.11), Ube2h(0.09), Ube2c(0.06), Ube2d1(0.04), Ube2d1(0.04), Ube2v2(0.02), Ube2w(0.01), Ube2w(0.01), Ube2j1(0), Ube2j1(0), Ube2d3(0), Ube2r2(0), Ube2b(-0.01), Ube2g2(-0.01), Ube2g2(-0.01), Ube2e3(-0.02), Ube2a(-0.03), Ube2a(-0.03), Ube2q1(-0.03), Ube2o(-0.03), Ube2j2(-0.04), Ube2d2a(-0.06), Ube2e2(-0.06), Ube2n(-0.07), Ube2n(-0.07), Ube2g1(-0.12), Ube2k(-0.14), U…
maturation of 5.8S rRNA	0.00862403	0.390689	1.29426e-07	2.0814e-06	15	0.0292004	0.00603374	0.00627228	0.0132119	0.0082159	Las1l(0.35), Wdr37(0.1), Exosc10(0), Skiv2l2(-0.06), C1d(-0.13), Mphosph6(-0.14), Mphosph6(-0.14), Nsa2(-0.25), Rpf1(-0.26), Nol9(-0.32), Eif6(-0.34), Mak16(-0.34), Rrp15(-0.36), Exosc4(-0.44), Wdr12(-0.56),
SMN complex	0.0086757	0.436006	1.3947e-07	2.23278e-06	12	0.0265194	0.0135352	0.00280818	0.017449	0.00688924	Fmr1(0.07), Fmr1(0.07), Ddx20(-0.1), Gemin2(-0.1), Strap(-0.12), Gemin7(-0.19), Smn1(-0.25), Zpr1(-0.25), Gemin5(-0.34), Gemin8(-0.4), Gemin8(-0.4), Gemin6(-0.79),
GTPase activity	0.0044707	0.113797	1.51105e-07	2.40814e-06	208	0.00290627	0.000821154	0.000942883	0.441081	0.0109835	Iigp1(0.76), Iigp1(0.76), Adssl1(0.57), Gng4(0.56), Gnao1(0.53), Gnao1(0.53), Gnao1(0.53), Rab27b(0.51), Tuba8(0.5), Gng2(0.38), Rhoj(0.38), Gem(0.37), Gspt2(0.37), Rhou(0.37), Tubb4a(0.34), Gna14(0.32), Tuba1a(0.31), Rab3b(0.31), Ddx3x(0.26), Rem2(0.26), Agap2(0.24), Gnb4(0.23), Lrrk2(0.23), Rab3a(0.22), Rac2(0.22), Rhoq(0.22), Rhoq(0.22), F830016B08Rik(0.22), Arl4a(0.2), Gna13(0.2), Gna13(0.2),…
peroxisome organization	0.00578976	0.345337	2.03617e-07	3.23048e-06	21	0.138341	0.0571134	0.00471058	0.000176275	0.00638771	Sec16b(0.21), Scp2(0.04), Abcd1(0.01), Pex1(0), Pex5(-0.02), Pex5(-0.02), Pex3(-0.09), Pex7(-0.1), Abcd3(-0.11), Pex6(-0.11), Pex11b(-0.12), Pex19(-0.14), Pex2(-0.19), Pex14(-0.2), Tmem135(-0.2), Acot8(-0.24), Pex16(-0.27), Pex16(-0.27), Pex12(-0.32), Pex10(-0.46), Pex11a(-0.67),
protein import into peroxisome matrix	0.00524529	0.435762	2.17664e-07	3.43792e-06	13	0.115402	0.0544199	0.00163026	0.000250641	0.0190109	Pex1(0), Pex5(-0.02), Pex5(-0.02), Pex26(-0.09), Pex7(-0.1), Pex7(-0.1), Pex2(-0.19), Pex14(-0.2), Pex16(-0.27), Pex12(-0.32), Pex12(-0.32), Pex10(-0.46), Pex10(-0.46),
mitochondrial inner membrane presequence translocase complex	0.00888089	0.450339	2.33458e-07	3.671e-06	11	0.0240597	0.0114117	0.00216294	0.00520333	0.0547506	Pam16(-0.06), Timm17b(-0.14), Timm17b(-0.14), Timm17a(-0.15), Timm17a(-0.15), Timm23(-0.18), Timm23(-0.18), Timm21(-0.19), Timm21(-0.19), Timm50(-0.38), Timm50(-0.38),
2 iron, 2 sulfur cluster binding	0.00633618	0.319665	2.4498e-07	3.83513e-06	23	0.072921	0.0196127	0.0198833	0.00337237	0.00150688	Cmah(0.4), Xdh(0.16), Aifm3(0.16), Ndufs1(-0.04), Iscu(-0.05), Isca1(-0.05), Fdx1(-0.07), Cisd2(-0.1), Uqcrfs1(-0.14), Sdhb(-0.14), Glrx2(-0.15), Fech(-0.16), Ndufv2(-0.16), Cisd3(-0.16), Cisd1(-0.18), Ciapin1(-0.2), Aox1(-0.21), Fxn(-0.22), Isca2(-0.22), Rfesd(-0.26), Fdx1l(-0.32), Glrx5(-0.32), Aox3(-0.57),
transcription from mitochondrial promoter	0.00920707	0.449578	2.54426e-07	3.96546e-06	11	0.114893	0.0177028	0.0356961	0.00122241	0.000987436	Mterf3(-0.02), Slc25a33(-0.02), Tfam(-0.15), Mterf4(-0.15), Polrmt(-0.21), Ppargc1b(-0.25), Tfb2m(-0.39), Tfb2m(-0.39), Peo1(-0.43), Mrpl12(-0.44), Tefm(-0.58),
DNA N-glycosylase activity	0.00533167	0.380348	2.79581e-07	4.3384e-06	16	0.023179	0.0158911	0.00214823	0.000787085	0.15018	Mbd4(0.2), Tdg(0.07), Tdg(0.07), Mutyh(0), Mutyh(0), Smug1(-0.13), Smug1(-0.13), Macrod2(-0.14), Neil1(-0.26), Macrod1(-0.27), Neil2(-0.32), Nthl1(-0.36), Nthl1(-0.36), Ogg1(-0.59), Ogg1(-0.59), Dnph1(-0.7),
oligosaccharyltransferase complex	0.00719085	0.47309	3.03433e-07	4.68797e-06	11	0.00126228	0.00614476	0.00194637	0.105978	0.0672288	Tusc3(0), Stt3a(-0.06), Rpn2(-0.08), Magt1(-0.09), Magt1(-0.09), Stt3b(-0.09), Dad1(-0.13), Rpn1(-0.16), Ostc(-0.22), Ostc(-0.22), Krtcap2(-0.35),
protein methylation	0.0101186	0.301696	3.62954e-07	5.58318e-06	24	0.0442142	0.0123622	0.0010633	0.0101993	0.04112	Mtr(0.28), Btg1(0.25), Btg2(0.25), Icmt(0.05), Ilf3(0), Prmt2(-0.01), Pcmt1(-0.01), Pcmt1(-0.01), Prmt9(-0.02), Etf1(-0.07), Mettl21a(-0.15), Snrpb(-0.17), Prmt6(-0.17), Hemk1(-0.2), Carm1(-0.23), Snrpd3(-0.23), Armt1(-0.23), Gspt1(-0.25), Lcmt1(-0.26), Lcmt1(-0.26), Ntmt1(-0.42), Prmt5(-0.5), Prmt7(-0.56), Prmt3(-0.77),
Ino80 complex	0.0106019	0.356909	4.28062e-07	6.55621e-06	17	0.151793	0.00379767	0.00372598	0.0131173	0.00799364	Nfrkb(0.11), Ino80(0.08), Yy1(0.06), Ino80c(-0.03), Actr5(-0.04), Actr8(-0.09), Mcrs1(-0.14), Uchl5(-0.14), Actl6a(-0.18), Ino80e(-0.18), Ino80e(-0.18), Ino80b(-0.2), Tfpt(-0.32), Ruvbl1(-0.39), Ruvbl1(-0.39), Ruvbl2(-0.51), Ruvbl2(-0.51),
ubiquitin-dependent protein catabolic process	0.00445949	0.158574	5.03424e-07	7.67722e-06	143	0.273054	0.0133743	0.000330611	0.0149466	0.00554915	Fbxo32(0.52), Fbxo2(0.43), Usp27x(0.38), Ubr2(0.34), Rlim(0.29), Usp47(0.29), Usp2(0.25), Cul7(0.25), Usp43(0.23), Usp9x(0.22), Usp13(0.22), Uchl1(0.2), Trp53inp2(0.2), Usp42(0.2), Usp11(0.2), Topors(0.19), Usp33(0.19), Usp34(0.18), Rnf40(0.18), Herpud1(0.17), Herpud1(0.17), Usp12(0.16), Cyld(0.15), Usp38(0.15), Cul3(0.14), Usp37(0.14), Siah1a(0.13), Rnf8(0.13), Arih2(0.12), Ubr1(0.11), Ubr1(0.11…
hydrogen peroxide catabolic process	0.00376903	0.431246	5.16173e-07	7.82499e-06	15	0.458535	0.124055	0.000515068	0.000442651	0.00111362	Pxdn(0.07), Txnrd1(0.03), Gpx3(-0.09), Gpx3(-0.09), Cat(-0.18), Cat(-0.18), Cat(-0.18), Prdx5(-0.18), Prdx2(-0.2), Gpx1(-0.21), Gpx1(-0.21), Apoa4(-0.26), Prdx3(-0.3), Prdx6(-0.3), Prdx1(-0.35),
late endosome membrane	0.0105243	0.268878	5.17537e-07	7.82499e-06	30	0.0307325	0.0182232	0.00337275	0.0402823	0.00613581	Anxa6(0.16), Gosr2(0.11), Sppl2a(0.06), Slc11a2(0.03), Anxa2(0.01), Vps39(-0.01), Lamp2(-0.03), Lamp2(-0.03), Stx7(-0.03), Vamp8(-0.04), Anxa8(-0.06), Rab7(-0.06), Vps36(-0.06), Vps36(-0.06), Rnf13(-0.07), Tmem55b(-0.07), Vti1b(-0.09), Vti1b(-0.09), Tmem55a(-0.09), Vps41(-0.09), Cd63(-0.12), Vti1a(-0.13), Stx8(-0.14), Snf8(-0.16), Lamtor1(-0.18), H2-Eb1(-0.19), Cyb561a3(-0.19), Ltv1(-0.27), March…
double-strand break repair via nonhomologous end joining	0.010709	0.286843	5.54749e-07	8.35192e-06	26	0.00176525	0.011833	0.0258279	0.012745	0.0626988	Kdm2a(0.25), Dclre1c(0.19), Rnf8(0.13), Dclre1a(0.03), Pola1(0), Pola1(0), Lig4(-0.03), Lig4(-0.03), Prkdc(-0.04), Lig3(-0.06), Mre11a(-0.08), Nhej1(-0.12), Nhej1(-0.12), Nhej1(-0.12), Xrcc4(-0.12), Xrcc4(-0.12), Mlh1(-0.18), Xrcc5(-0.18), Xrcc5(-0.18), BC029214(-0.18), Dclre1b(-0.19), Prpf19(-0.22), Lig1(-0.27), Psmd14(-0.28), Xrcc6(-0.37), Xrcc6(-0.37),
NAD binding	0.00527933	0.244914	6.22413e-07	9.33092e-06	41	0.342447	0.139477	0.00769133	0.000159393	0.000434182	Nnt(0.21), Me2(0.21), Adh1(0.19), Sord(0.13), Ctbp2(0.12), Sirt3(0.12), Hpgd(0.11), Me3(0.05), Mdh1(0.01), Glyr1(0.01), Bdh2(-0.01), Idh2(-0.04), Cyb5r3(-0.05), Ctbp1(-0.06), Ndufs2(-0.06), Aldh5a1(-0.07), Idh1(-0.08), Ndufv1(-0.08), Aldh9a1(-0.08), Sirt2(-0.08), Dld(-0.09), Idh3g(-0.09), Ldhb(-0.09), Hadha(-0.1), Hibadh(-0.11), Hadhb(-0.15), Grhpr(-0.17), Me1(-0.18), Ugdh(-0.18), Aox1(-0.21), Gp…
nucleotidyltransferase activity	0.00948284	0.171461	6.45643e-07	9.63834e-06	73	0.139678	0.00552107	0.00159793	0.0102073	0.0264953	Nmnat2(0.44), Oas3(0.33), Zcchc6(0.32), Zcchc11(0.31), Uap1(0.3), Polg2(0.26), Polr2a(0.23), Pcyt2(0.22), Rev3l(0.19), Polm(0.19), Papolg(0.19), Papss2(0.18), Cds1(0.15), Cds2(0.1), Papd7(0.09), Rev1(0.07), Pold3(0.06), Primpol(0.04), Polg(0.03), Pola1(0), Gmppb(0), Galt(-0.02), Pcyt1a(-0.03), Papss1(-0.03), Tut1(-0.04), Polr2b(-0.04), Pole2(-0.06), Tamm41(-0.06), Ispd(-0.07), Polh(-0.08), Pole(-…
peptidyl-prolyl cis-trans isomerase activity	0.010904	0.219832	6.48446e-07	9.63951e-06	44	0.00913288	0.0060826	0.0136849	0.0317835	0.0291011	Ttc9(0.58), Nktr(0.36), Ranbp2(0.23), Fkbp5(0.15), Fkbp5(0.15), Fkbp10(0.15), Ppil6(0.15), Fkbp14(0.13), Ppig(0.1), Ppig(0.1), Ppil4(0.09), Fkbp7(0.07), Fkbp1b(0.05), Fkbp1b(0.05), Cwc27(0.03), Ppib(0), Ppil2(-0.03), Fkbpl(-0.04), Ppid(-0.08), Ppid(-0.08), Ppid(-0.08), Ttc9c(-0.1), Ptpa(-0.14), Fkbp2(-0.15), Ppic(-0.15), Pin1(-0.15), Ppwd1(-0.15), Ppia(-0.15), Ppia(-0.15), Fkbp8(-0.19), Fkbp9(-0.…
cullin family protein binding	0.0104634	0.35381	6.64903e-07	9.84279e-06	17	0.0370765	0.00862534	0.00753908	0.0511616	0.00492914	Kctd5(0.16), Dcun1d3(0.13), Park2(-0.02), Rnf7(-0.06), Rnf7(-0.06), Dcun1d1(-0.08), Anapc11(-0.11), Anapc11(-0.11), Kctd2(-0.13), Rbx1(-0.15), Rbx1(-0.15), Dcun1d5(-0.21), Dcun1d2(-0.24), Skp1a(-0.25), Dcun1d4(-0.26), Kctd17(-0.28), Kctd17(-0.28),
acyl-CoA hydrolase activity	0.00209588	0.334388	6.8319e-07	1.00714e-05	28	0.640825	0.0549229	0.031316	4.10842e-06	0.000596821	Acot5(0.35), Acot10(0.2), Acot11(0.07), Lypla1(0.03), Ppt2(0), Acot9(-0.02), Lyplal1(-0.09), Lypla2(-0.12), Acot13(-0.13), Acot3(-0.14), Acot3(-0.14), Acot3(-0.14), Acot2(-0.15), Acot2(-0.15), Acot4(-0.15), Acot4(-0.15), Acot4(-0.15), Haghl(-0.16), Acot7(-0.19), Park7(-0.2), Acot8(-0.24), Acot8(-0.24), Ovca2(-0.24), Acot6(-0.36), Acot12(-0.43), Acot1(-0.57), Acot1(-0.57), Acot1(-0.57),
mismatch repair	0.00996039	0.26825	7.07498e-07	1.03864e-05	31	0.00155733	0.0216983	0.00360051	0.044205	0.0782444	Msh5(0.5), Setd2(0.37), Msh6(0.11), Msh6(0.11), Msh6(0.11), Tdg(0.07), Pms2(0.05), Pms2(0.05), Pms2(0.05), Pms2(0.05), Pms1(0.05), Msh3(-0.05), Msh3(-0.05), Msh3(-0.05), Xpc(-0.07), Rpa1(-0.08), Pcna(-0.11), Pcna(-0.11), Msh2(-0.14), Msh2(-0.14), Msh2(-0.14), Msh2(-0.14), Rpa2(-0.14), Mlh1(-0.18), Mlh1(-0.18), Mlh1(-0.18), Rpa3(-0.35), Mlh3(-0.38), Mlh3(-0.38), Rnaseh2a(-0.42), Rnaseh2a(-0.42),
ligase activity	0.00614544	0.092032	7.26519e-07	1.06216e-05	332	0.11531	0.105683	0.00140104	0.00343819	0.00423865	Acsl6(0.72), Rnf125(0.64), Adssl1(0.57), Tnfaip3(0.54), Acsm5(0.49), Cbl(0.48), Herc2(0.48), Trim36(0.47), Hecw2(0.47), Hectd1(0.43), Rnf169(0.42), Rnf180(0.38), Glul(0.37), Mid1(0.37), Egr2(0.36), Birc3(0.35), Hectd2(0.35), Rc3h2(0.35), Rnf144b(0.34), Ubr2(0.34), Ubr4(0.33), Rnf38(0.33), Cblb(0.32), Rimklb(0.31), Rlim(0.29), Msl2(0.29), Trim39(0.29), Neurl3(0.29), Trim56(0.29), Ubr5(0.28), G2e3(…
ubiquinone biosynthetic process	0.00989161	0.407516	7.89399e-07	1.14934e-05	13	0.274674	0.00358039	0.0130365	0.0027338	0.00726061	Coq8a(0.17), Coq7(-0.05), Coq6(-0.08), Pdss2(-0.17), Pdss2(-0.17), Coq9(-0.18), Ubiad1(-0.19), Pdss1(-0.21), Pdss1(-0.21), Coq5(-0.23), Coq2(-0.33), Coq4(-0.33), Coq3(-0.35),
U4/U6 x U5 tri-snRNP complex	0.0116795	0.29077	7.9395e-07	1.15123e-05	25	0.0924462	0.00465309	0.0123223	0.00236226	0.0414439	Lsm5(0.09), Prpf3(0.08), Sart1(0.06), Prpf6(0.06), Prpf6(0.06), Lsm8(0.04), Prpf18(0.03), Ddx23(0), Zmat2(-0.06), Lsm3(-0.06), Lsm3(-0.06), Prpf4(-0.07), Prpf4(-0.07), Snrpn(-0.13), Snrpe(-0.14), Lsm6(-0.15), Snrpb(-0.17), Txnl4a(-0.23), Prpf31(-0.24), Ppih(-0.26), Txnl4b(-0.28), Nhp2l1(-0.33), Lsm2(-0.38), Lsm2(-0.38), Snrpd2(-0.38),
integral component of peroxisomal membrane	0.0065892	0.37692	8.83207e-07	1.27542e-05	16	0.0338536	0.166537	0.00347621	0.00166364	0.0120605	Slc27a2(0.06), Slc27a2(0.06), Abcd1(0.01), Pex3(-0.09), Pex26(-0.09), Pex11b(-0.12), Pex11g(-0.12), Pex13(-0.12), Fis1(-0.14), Pex2(-0.19), Pex16(-0.27), Slc25a17(-0.29), Pex12(-0.32), Pex12(-0.32), Pex10(-0.46), Pex11a(-0.67),
ATP biosynthetic process	0.00536176	0.35756	9.28146e-07	1.3305e-05	20	0.114088	0.0457204	0.0175885	0.00384216	0.00135985	Tgfb1(0.28), Pkm(0.25), Gbas(0.03), Atp5b(-0.05), Atp5a1(-0.06), Slc25a13(-0.06), Ldhd(-0.12), Atp5e(-0.12), Atp5j2(-0.13), Atp5c1(-0.14), Atp5o(-0.14), Atp5k(-0.15), Aldoa(-0.16), Atp5d(-0.17), Atp5s(-0.17), Surf1(-0.19), Atp5l(-0.2), Uqcc3(-0.25), Chchd10(-0.32), Pklr(-0.33),
regulation of proteasomal ubiquitin-dependent protein catabolic process	0.0143386	0.384099	9.28868e-07	1.3305e-05	14	0.0236277	0.00529413	0.0190795	0.00930019	0.044973	Gna12(0.06), Gna12(0.06), Gba(-0.03), Ufl1(-0.04), Araf(-0.06), Dda1(-0.06), Ube2k(-0.14), Ube2k(-0.14), Commd1(-0.2), Commd1(-0.2), Rad23b(-0.2), Ubqln4(-0.22), Rad23a(-0.3), Glmn(-0.48),
protein O-linked glycosylation	0.00916391	0.254725	1.12049e-06	1.59851e-05	34	0.0027954	0.0231697	0.0102031	0.0360884	0.0448004	Tet3(0.48), Tet2(0.32), Tet2(0.32), Trak2(0.2), Tet1(0.12), Galnt1(0.03), Eogt(0.03), C1galt1(0.02), Galnt10(0.02), Galnt10(0.02), Ogt(-0.04), Ogt(-0.04), Ogt(-0.04), Ogt(-0.04), Galnt2(-0.1), Galnt2(-0.1), Pgm3(-0.1), Vegfb(-0.15), Galnt7(-0.18), C1galt1c1(-0.19), C1galt1c1(-0.19), Pomgnt1(-0.19), Pomgnt1(-0.19), Pomt1(-0.22), Pofut1(-0.23), Poglut1(-0.23), Poglut1(-0.23), Pomt2(-0.25), St8sia6(…
ATP synthesis coupled proton transport	0.00918472	0.369946	1.13788e-06	1.6168e-05	18	0.127534	0.0454028	0.0216431	0.00287022	0.00154831	Atp6v0a1(0.09), Tcirg1(0.06), Atp6v0a2(-0.01), Atp5j(-0.02), Atp6v0a4(-0.04), Atp5b(-0.05), Atp5a1(-0.06), Atp5h(-0.08), Atp5g3(-0.11), Atp5e(-0.12), Atp5c1(-0.14), Atp5o(-0.14), Atp5f1(-0.15), Atp5k(-0.15), Atp5d(-0.17), Atp5l(-0.2), Atp5g1(-0.29), Atp5g2(-0.65),
fatty acid beta-oxidation using acyl-CoA dehydrogenase	0.00185611	0.388503	1.22478e-06	1.73331e-05	25	0.559225	0.306371	0.00141738	4.53747e-06	0.00292028	Acox3(0.19), Acad10(0.15), Acadsb(0.1), Ivd(0.06), Acadl(-0.05), Acadl(-0.05), Gcdh(-0.06), Gcdh(-0.06), Acadvl(-0.08), Acadvl(-0.08), Etfa(-0.08), Etfa(-0.08), Acad11(-0.09), Acad11(-0.09), Etfdh(-0.11), Acadm(-0.13), Acadm(-0.13), Acad8(-0.18), Acad9(-0.19), Acox1(-0.2), Acox2(-0.21), Etfb(-0.23), Etfb(-0.23), Acads(-0.24), Acads(-0.24),
very long-chain fatty acid biosynthetic process	0.0117119	0.339175	1.28883e-06	1.81669e-05	18	0.0263959	0.00919995	0.0014324	0.0747366	0.0362178	Elovl6(0.07), Elovl5(-0.01), Elovl5(-0.01), Elovl7(-0.06), Elovl7(-0.06), Elovl1(-0.1), Elovl1(-0.1), Hacd4(-0.1), Hacd4(-0.1), Hacd2(-0.1), Hacd2(-0.1), Tecr(-0.15), Hacd3(-0.27), Hacd3(-0.27), Elovl2(-0.28), Elovl2(-0.28), Elovl2(-0.28), Hacd1(-0.56),
cytochrome-c oxidase activity	0.00517612	0.293211	1.3548e-06	1.90209e-05	29	0.0666942	0.0686222	0.0783216	0.00445704	0.000258158	AA467197(0.68), Cox8b(0.32), Cox7a1(0.1), COX1(0.08), Cox6c(0.03), Cox8a(-0.03), Ndufa4(-0.05), Ndufa4(-0.05), Cox5b(-0.07), Cox7a2(-0.07), Cox7b(-0.07), Cox15(-0.1), Cox15(-0.1), Cox6b2(-0.1), Cox7a2l(-0.11), Cox4i1(-0.12), Cox6a1(-0.13), Ndufa4l2(-0.13), Cox6b1(-0.15), Cox5a(-0.18), Cox5a(-0.18), Surf1(-0.19), Coa6(-0.2), Cox7c(-0.23), Cox10(-0.27), Cox4i2(-0.34), Cox4i2(-0.34), Cox4i2(-0.34), …
ribosome disassembly	0.0155641	0.449487	1.40174e-06	1.96022e-05	10	0.0275185	0.00908375	0.00920445	0.0396756	0.0186337	Denr(0.08), Mcts1(-0.1), Hbs1l(-0.12), Gfm2(-0.13), Gfm2(-0.13), Eif2d(-0.26), Mrrf(-0.28), Mtif3(-0.35), Mtif3(-0.35), Mtif3(-0.35),
protein targeting to mitochondrion	0.0150305	0.355467	1.43098e-06	1.99323e-05	16	0.0476178	0.0155554	0.0341629	0.00752909	0.00847014	Ppp2r2b(0.21), Ywhaz(0.05), Tomm34(0.01), Mfn2(0.01), Fbxo7(-0.06), Fis1(-0.14), Mterf4(-0.15), Mtx2(-0.18), Dusp18(-0.18), Aip(-0.19), Mtx1(-0.25), Tomm20(-0.31), Tomm40(-0.38), Bid(-0.62), Timm8a1(-0.65), Tomm5(-0.78),
mitochondrial fusion	0.0126828	0.341648	1.65613e-06	2.2978e-05	18	0.11866	0.0693951	0.00430916	0.00244131	0.0108618	Miga1(0.02), Miga1(0.02), Usp30(0.01), Mfn2(0.01), Mfn2(0.01), Mfn1(-0.02), Mfn1(-0.02), Miga2(-0.06), Miga2(-0.06), Opa1(-0.07), Opa1(-0.07), Afg3l1(-0.09), Chchd3(-0.14), Fis1(-0.14), Afg3l2(-0.15), Bak1(-0.18), Bax(-0.34), Bax(-0.34),
protein disulfide oxidoreductase activity	0.0151397	0.315234	2.08423e-06	2.88012e-05	20	0.0445445	0.0118793	0.00879542	0.0140969	0.0390141	Ero1lb(0.39), Sh3bgrl3(0.3), Glrx(0.26), Dnajc10(0.05), Dnajc10(0.05), Gstk1(0.05), Ero1l(-0.02), Glrx2(-0.15), Enox2(-0.18), Txnl1(-0.22), Txn1(-0.28), Ptges2(-0.28), Txnrd3(-0.29), Gfer(-0.3), Gfer(-0.3), Txn2(-0.31), Txn2(-0.31), Glrx5(-0.32), Glrx3(-0.36), Chchd4(-0.55),
Fanconi anaemia nuclear complex	0.0149388	0.363913	2.09212e-06	2.88012e-05	15	0.0538644	0.127809	0.0109355	0.0174824	0.00083397	Fancm(0.07), Faap100(-0.01), Fanca(-0.04), Fance(-0.1), Fancg(-0.15), Faap20(-0.16), Faap20(-0.16), Fancc(-0.2), Fancc(-0.2), Stra13(-0.2), Fancf(-0.31), Fancf(-0.31), Fancb(-0.32), Fancl(-0.34), Faap24(-0.39),
proteasome-mediated ubiquitin-dependent protein catabolic process	0.00969113	0.143377	2.24284e-06	3.07564e-05	145	0.189903	0.0274383	0.000524834	0.0334586	0.00936708	Abtb2(0.48), Rnf122(0.42), Sirt1(0.4), Rnf38(0.33), Pml(0.32), Rlim(0.29), Ddit3(0.27), Smurf1(0.27), Rmnd5a(0.24), Znrf1(0.24), Fbxo45(0.24), Klhl11(0.22), Tbl1xr1(0.21), Rnf165(0.21), Fbxl3(0.2), Rnf111(0.2), Btbd3(0.2), Trim72(0.2), Nfe2l2(0.19), Bfar(0.19), Bfar(0.19), Topors(0.19), Arrb2(0.19), Fbxw11(0.17), Arrb1(0.17), Rnf24(0.16), Kctd5(0.16), Cul3(0.14), Cul3(0.14), Edem3(0.14), Siah1a(0…
translation initiation factor binding	0.016919	0.28639	2.28494e-06	3.12128e-05	24	0.0710044	0.0351807	0.00839468	0.00705331	0.0167709	Cacna1c(0.5), Ddx3x(0.26), Syt11(0.15), Gch1(0.13), Fmr1(0.07), Celf1(0.02), Eif3c(-0.08), Larp1(-0.1), Gle1(-0.1), Trim32(-0.14), Polr2d(-0.15), Eif3b(-0.17), Tbl2(-0.18), Polr2g(-0.18), Eif3f(-0.2), Eif2b5(-0.21), Eif2b4(-0.22), Zpr1(-0.25), Zpr1(-0.25), Rps24(-0.28), Rps3a1(-0.28), Eif3m(-0.28), Eif4ebp1(-0.38), Rps19(-0.4),
release of cytochrome c from mitochondria	0.0164143	0.269864	2.41778e-06	3.29003e-05	27	0.0580647	0.0299233	0.0125542	0.0213809	0.00614094	Pmaip1(0.76), Pmaip1(0.76), Jun(0.69), Bcl2(0.24), Atp7a(0.17), Bcl2l1(0.06), Bcl2l1(0.06), Sod2(0.02), Dnm1l(0.01), Cck(-0.04), Sfn(-0.05), Ggct(-0.12), Mapk9(-0.13), Fis1(-0.14), Bad(-0.16), Bak1(-0.18), Bak1(-0.18), Bbc3(-0.2), Bax(-0.34), Bax(-0.34), Bax(-0.34), Timm50(-0.38), Trp53(-0.49), Trp53(-0.49), Bid(-0.62), Bid(-0.62), Bid(-0.62),
aminoacyl-tRNA editing activity	0.0174985	0.421418	2.55878e-06	3.46857e-05	11	0.0062498	0.0346349	0.0653757	0.0121716	0.0170419	Aarsd1(0.07), Lars2(0.02), Iars2(-0.09), Aars(-0.13), Dtd2(-0.21), Prorsd1(-0.22), Lars(-0.29), Dtd1(-0.31), Vars2(-0.31), Vars(-0.39), Iars(-0.45),
NADH dehydrogenase activity	0.0143961	0.395835	2.66817e-06	3.5987e-05	14	0.114963	0.0511202	0.0445261	0.00426105	0.00130244	ND5(0.09), ND1(0.06), Ndufs1(-0.04), Ndufs2(-0.06), Ndufv1(-0.08), Ndufa9(-0.09), Ndufa9(-0.09), Ndufs3(-0.11), Ndufb7(-0.15), Ndufa13(-0.15), Ndufv2(-0.16), Ndufs8(-0.2), Ndufb8(-0.22), Ndufs7(-0.28),
flavin adenine dinucleotide binding	0.00105592	0.224397	2.67512e-06	3.5987e-05	73	0.681526	0.279972	0.00833967	2.11166e-08	0.0142816	Nos3(0.51), Nos2(0.45), Fmo2(0.28), Kmo(0.22), Kmo(0.22), Acox3(0.19), Acox3(0.19), Kdm1a(0.17), Fmo1(0.16), Xdh(0.16), Xdh(0.16), Aifm3(0.16), Acad10(0.15), Agps(0.14), Fmo5(0.11), Acadsb(0.1), Sdha(0.09), Por(0.08), Ivd(0.06), Txnrd1(0.03), Nos1(0.01), Ndor1(-0.02), Sardh(-0.03), Fmo4(-0.03), Mto1(-0.04), Acadl(-0.05), Acadl(-0.05), Dmgdh(-0.05), Cyb5r3(-0.05), Gcdh(-0.06), Gcdh(-0.06), Mthfr(-…
DNA recombination	0.0129534	0.171729	2.70285e-06	3.60968e-05	69	0.029182	0.0146839	0.00199027	0.0190156	0.126139	Xrcc3(0.41), Ino80d(0.4), Setx(0.34), Ercc1(0.29), Ercc1(0.29), Kin(0.25), Smc5(0.2), Polm(0.19), Dclre1c(0.19), Spidr(0.16), Blm(0.12), Nfrkb(0.11), Rad52(0.08), Ino80(0.08), Yy1(0.06), Slx4(0.06), Eme2(0.06), Morf4l1(0.04), Palb2(0.04), Brca2(0.02), Smc6(0), Xrcc2(-0.01), Rad50(-0.02), Rpain(-0.02), Ino80c(-0.03), Lig4(-0.03), Wrn(-0.04), Actr5(-0.04), Lig3(-0.06), Xrn2(-0.07), Apex2(-0.07), Ra…
proton-transporting ATP synthase complex, coupling factor F(o)	0.0102997	0.476951	2.70369e-06	3.60968e-05	10	0.0545745	0.0291325	0.0453081	0.0166144	0.00216422	Atp5j(-0.02), Atp5h(-0.08), Atp5g3(-0.11), Atp5j2(-0.13), Atp5f1(-0.15), Atp5k(-0.15), Atp5s(-0.17), Atp5l(-0.2), Atp5g1(-0.29), Atp5g2(-0.65),
zinc ion transmembrane transporter activity	0.0134178	0.271478	2.72933e-06	3.63022e-05	27	0.00555058	0.0435463	0.0175703	0.0249855	0.0322619	Slc39a8(0.35), Slc30a7(0.12), Slc39a14(0.03), Slc39a14(0.03), Slc30a5(-0.01), Slc30a5(-0.01), Slc30a5(-0.01), Slc30a1(-0.04), Slc30a1(-0.04), Slc39a13(-0.04), Slc39a13(-0.04), Slc39a13(-0.04), Slc30a4(-0.07), Slc30a4(-0.07), Slc39a1(-0.07), Slc39a3(-0.07), Slc39a5(-0.11), Slc39a6(-0.14), Slc39a6(-0.14), Slc30a2(-0.14), Slc30a2(-0.14), Slc39a4(-0.16), Slc39a4(-0.16), Slc39a7(-0.17), Slc39a10(-0.24…
mitochondrial acetyl-CoA biosynthetic process from pyruvate	0.016143	0.467581	2.79827e-06	3.70797e-05	10	0.0724675	0.0515801	0.0246437	0.00502277	0.00576125	Pdha1(-0.02), Pdhb(-0.07), Dld(-0.09), Dld(-0.09), Mpc2(-0.09), Mpc1(-0.11), Mpc1(-0.11), Pdhx(-0.13), Dlat(-0.13), Dlat(-0.13),
tRNA splicing, via endonucleolytic cleavage and ligation	0.0147988	0.403398	3.10333e-06	4.09685e-05	12	0.0317633	0.179303	0.00581939	0.0163676	0.00375262	Clp1(0.11), Clp1(0.11), Tsen34(-0.1), Ddx1(-0.1), Zbtb8os(-0.19), Zbtb8os(-0.19), Trpt1(-0.21), 2700060E02Rik(-0.23), Rtcb(-0.25), Tsen15(-0.29), Tsen54(-0.29), Tsen2(-0.53),
exonuclease activity	0.0125377	0.215415	3.32107e-06	4.36802e-05	43	0.0153106	0.0143637	0.00468102	0.050522	0.0686906	Noct(0.59), Xrn1(0.22), Pan2(0.2), Dclre1c(0.19), Fen1(0.16), Cnot6(0.14), Isg20l2(0.04), Polg(0.03), Cnot6l(0.01), Exosc10(0), Cnot8(0), Rad9a(-0.01), Rexo1(-0.01), Eri2(-0.01), Pde12(-0.01), Dis3l(-0.01), Cnot7(-0.02), Wrn(-0.04), Exosc3(-0.04), Dis3l2(-0.04), Xrn2(-0.07), Mgme1(-0.07), Apex2(-0.07), Mre11a(-0.08), Isg20(-0.08), Ddx1(-0.1), Exd2(-0.11), Rexo4(-0.12), Dxo(-0.13), Pnpt1(-0.17), F…
double-strand break repair via homologous recombination	0.00660277	0.188573	3.61906e-06	4.72809e-05	68	0.108111	0.0328557	0.00233921	0.0146506	0.0257404	Xrcc3(0.41), Smc5(0.2), Zfyve26(0.16), Spidr(0.16), Sfpq(0.13), Blm(0.12), Rad52(0.08), Ino80(0.08), Rbbp8(0.08), Ercc4(0.07), Ercc4(0.07), Nucks1(0.07), Yy1(0.06), Slx4(0.06), Oraov1(0.06), Rad54l(0.05), Rad54l(0.05), Morf4l1(0.04), Helq(0.04), Palb2(0.04), Brca2(0.02), Brca2(0.02), Mcm9(0.01), Mcm9(0.01), Smc6(0), Nabp1(0), Xrcc2(-0.01), Xrcc2(-0.01), Rad50(-0.02), Shfm1(-0.02), Wdr48(-0.02), S…
single-strand selective uracil DNA N-glycosylase activity	0.0117301	0.425037	3.62157e-06	4.72809e-05	11	0.0157711	0.0272156	0.0294222	0.00309582	0.0915013	Mbd4(0.2), Mutyh(0), Smug1(-0.13), Smug1(-0.13), Macrod2(-0.14), Neil1(-0.26), Macrod1(-0.27), Neil2(-0.32), Nthl1(-0.36), Ogg1(-0.59), Dnph1(-0.7),
cytoplasmic exosome (RNase complex)	0.0205163	0.368919	3.75334e-06	4.8821e-05	14	0.0385844	0.0237009	0.0153524	0.011763	0.0329449	Carhsp1(0.13), Gtpbp1(0.02), Dis3l(-0.01), Dis3l(-0.01), Exosc3(-0.04), Exosc3(-0.04), Dis3l2(-0.04), Exosc8(-0.19), Dis3(-0.22), Exosc9(-0.24), Exosc4(-0.44), Exosc2(-0.47), Exosc5(-0.48), Exosc7(-0.49),
single-stranded DNA binding	0.0190557	0.151831	4.12153e-06	5.32924e-05	83	0.0117404	0.0182729	0.00827002	0.0188798	0.127234	Cry2(0.44), Xrcc3(0.41), Anxa1(0.33), Spen(0.31), Ercc1(0.29), Ercc1(0.29), Cdc45(0.22), Tdp2(0.22), Purb(0.21), Purb(0.21), Ercc5(0.2), Ercc5(0.2), Pura(0.15), Rtf1(0.14), Blm(0.12), Ssbp3(0.11), Fubp3(0.1), Ercc4(0.07), Ercc4(0.07), Nucks1(0.07), Nup35(0.06), Pms2(0.05), Pms2(0.05), Pms1(0.05), Ten1(0.04), Mcm4(0.03), Ssbp2(0.03), Brca2(0.02), Brca2(0.02), Hnrnpk(0.01), Fbxo18(0.01), Ptbp1(0), …
ATP-dependent DNA helicase activity	0.0169597	0.282457	4.12722e-06	5.32924e-05	24	0.0128563	0.024142	0.0073962	0.0386882	0.0593172	Ddx3x(0.26), Blm(0.12), Brip1(0.1), Mcm4(0.03), Fbxo18(0.01), Rad50(-0.02), Rad50(-0.02), Ercc2(-0.04), Wrn(-0.04), Nbn(-0.07), Nbn(-0.07), Helb(-0.07), Mre11a(-0.08), Rtel1(-0.1), Rtel1(-0.1), Ercc3(-0.11), Mcm6(-0.13), Xrcc5(-0.18), Ddx11(-0.18), Gtf2h4(-0.32), Mcm7(-0.33), Xrcc6(-0.37), Ruvbl1(-0.39), Ruvbl2(-0.51),
anaphase-promoting complex	0.015326	0.279017	4.54366e-06	5.84562e-05	25	0.0254504	0.0208458	0.00720689	0.124592	0.00976492	Cacul1(0.08), Anapc2(0.08), Anapc2(0.08), Ube2c(0.06), Cdc27(0.03), Anapc4(0.02), Cdc26(-0.02), Anapc10(-0.03), Anapc10(-0.03), Cdc23(-0.04), Anapc1(-0.05), Fzr1(-0.09), Anapc7(-0.1), Anapc5(-0.1), Anapc11(-0.11), Anapc11(-0.11), Anapc16(-0.12), Cdc20(-0.12), Rbx1(-0.15), Ube2s(-0.17), Anapc13(-0.18), Cdc16(-0.19), Anapc15(-0.25), Anapc15(-0.25), Mad2l2(-0.3),
intraciliary transport	0.0129714	0.234654	4.61227e-06	5.91239e-05	36	0.000417997	0.00499078	0.138337	0.0244047	0.173373	Klc3(0.34), Lca5(0.21), Ick(0.15), Cep131(0.08), Traf3ip1(0.05), Traf3ip1(0.05), Ift46(0.04), Ift46(0.04), Ift57(0.03), Ift57(0.03), Rpgr(0.01), Ift140(-0.01), Kif17(-0.02), Ift74(-0.04), Ift74(-0.04), Ift80(-0.04), Arl3(-0.07), Ssna1(-0.07), Ttc26(-0.08), Ttc26(-0.08), Bbs12(-0.12), Ift81(-0.16), Ift81(-0.16), Ift22(-0.17), Ift52(-0.17), Ift20(-0.18), Ift20(-0.18), Nme7(-0.18), Hspb11(-0.27), Cl…
integral component of mitochondrial inner membrane	0.0173151	0.30067	4.74576e-06	6.06156e-05	21	0.131539	0.0309539	0.0174902	0.00706514	0.0092942	Ccdc109b(0.2), Ccdc109b(0.2), Ppox(0.1), Mcur1(0.02), Mcur1(0.02), Mcu(-0.02), Mcu(-0.02), Etfdh(-0.11), Smdt1(-0.11), Timm17b(-0.14), Timm17b(-0.14), Timm17a(-0.15), Timm17a(-0.15), Timm23(-0.18), Timm23(-0.18), Cox18(-0.19), Tmem11(-0.2), Uqcc3(-0.25), Apoo(-0.37), Coa3(-0.51), Coa3(-0.51),
mitotic nuclear division	0.0107531	0.0972687	5.53323e-06	7.04193e-05	239	0.0788124	0.0371531	0.000293542	0.0544368	0.0559878	Bub1b(0.69), Kif23(0.66), Fam83d(0.65), Cit(0.6), Ccng2(0.55), Sycp3(0.52), Hmga2(0.4), Gem(0.37), Birc5(0.33), Snx18(0.32), Ppp1r12a(0.29), Ttyh1(0.29), Ccsap(0.29), Phf13(0.29), Lats2(0.26), Spag5(0.26), Clasp2(0.25), Ttc28(0.24), Aspm(0.23), Tnks(0.23), Snx33(0.23), Klhl21(0.23), Birc6(0.22), E4f1(0.22), Timeless(0.22), Usp9x(0.22), Cltc(0.22), Tpr(0.22), Cenpc1(0.21), Ckap5(0.21), Wapl(0.21),…
enoyl-CoA hydratase activity	0.0179321	0.442751	5.78352e-06	7.33408e-05	10	0.139738	0.0970409	0.0102433	0.00714522	0.00391639	Ehhadh(-0.07), Auh(-0.09), Auh(-0.09), Hadha(-0.1), Hadha(-0.1), Echs1(-0.13), Echs1(-0.13), Hadhb(-0.15), Hadhb(-0.15), Echdc2(-0.2),
proton transport	0.0088279	0.234144	6.21479e-06	7.85283e-05	52	0.225119	0.0899951	0.0173112	0.00407638	0.00176597	Hvcn1(0.66), Hvcn1(0.66), Atp6v1g3(0.32), Slc36a1(0.23), Slc36a1(0.23), Nnt(0.21), Atp6v0d2(0.14), Atp6v0a1(0.09), Atp4a(0.08), CYTB(0.08), Atp6v1g2(0.07), Slc11a2(0.03), Atp6v0c(0.02), Atp6v1a(0.01), Atp6v0a2(-0.01), Atp5j(-0.02), Atp6v1b1(-0.04), Atp6v1b1(-0.04), Atp6v0a4(-0.04), Atp5b(-0.05), Atp6v0e2(-0.05), Atp5a1(-0.06), Atp6v1c2(-0.07), Atp6v1d(-0.07), Slc9a6(-0.07), Atp5h(-0.08), Slc9a5(-…
glucuronosyltransferase activity	0.00565335	0.314747	6.40221e-06	8.06086e-05	26	0.124146	0.163232	0.00177841	0.000259816	0.108284	Csgalnact1(0.41), Ext1(0.08), Ugt2b34(0.03), Ext2(-0.03), Ext2(-0.03), Large1(-0.08), Large1(-0.08), B3gat3(-0.11), Ugt1a6a(-0.12), Ugt1a6a(-0.12), Large2(-0.18), B4gat1(-0.21), Ugt1a2(-0.23), Ugt1a2(-0.23), Ugt3a2(-0.23), Ugt3a1(-0.24), Ugt2b38(-0.27), Ugt2b38(-0.27), Ugt1a1(-0.35), Ugt1a1(-0.35), Ugt1a1(-0.35), Ugt8a(-0.36), Ugt1a10(-0.56), Ugt1a10(-0.56), Ugt2b37(-0.69), Ugt2b37(-0.69),
ATP metabolic process	0.0121845	0.249218	6.70231e-06	8.40879e-05	35	0.162862	0.0636329	0.0218069	0.00357708	0.00587804	Atp1a2(0.35), Ak4(0.32), Ampd3(0.32), Ampd3(0.32), Ak5(0.31), Hspa8(0.24), Atp7a(0.17), Atp6v1a(0.01), Slc25a25(0.01), Atp5j(-0.02), Ndufs1(-0.04), Vcp(-0.04), Atp5b(-0.05), Atp5a1(-0.06), Atp5h(-0.08), Ak3(-0.09), Atp1b1(-0.12), Ampd2(-0.12), Ampd2(-0.12), Atp5j2(-0.13), Ctns(-0.13), Atp5c1(-0.14), Atp5o(-0.14), Atp5k(-0.15), Bad(-0.16), Atp5d(-0.17), Atp6v1b2(-0.18), Ndufaf7(-0.18), Ola1(-0.19)…
zona pellucida receptor complex	0.0173485	0.435099	7.36405e-06	9.20637e-05	10	0.333426	0.0182716	0.0103819	0.00558044	0.0102499	Hspa1b(1.37), Hspa1l(0.44), Tcp1(-0.17), Zpbp(-0.2), Cct4(-0.21), Cct8(-0.21), Cct7(-0.25), Cct2(-0.27), Cct3(-0.4), Cct5(-0.43),
GTP binding	0.00995265	0.0870404	8.33754e-06	0.000103867	321	0.00976481	0.00150305	0.00781553	0.337655	0.0683357	Rab44(1.53), Hcar2(0.86), Iigp1(0.76), Rasd1(0.75), Rnd3(0.65), Rhov(0.64), Rnd1(0.62), Adssl1(0.57), Gnao1(0.53), Gnao1(0.53), Arl4c(0.52), Rab27b(0.51), Rab27b(0.51), Tuba8(0.5), Arl5b(0.5), Rasd2(0.45), Rrad(0.43), Rhoj(0.38), Gem(0.37), Gspt2(0.37), Gimap1(0.37), Rhou(0.37), Gimap4(0.37), Gimap5(0.37), Tubb4a(0.34), Rab30(0.34), Rasl11a(0.33), Ak4(0.32), Gna14(0.32), Insr(0.32), Tuba1a(0.31),…
proton-transporting ATPase activity, rotational mechanism	0.0212652	0.334438	9.08438e-06	0.000112774	20	0.112643	0.0865983	0.00874547	0.00762964	0.0136419	Atp6v0d2(0.14), Atp6v0a1(0.09), Tcirg1(0.06), Atp6v0c(0.02), Atp6v1a(0.01), Atp6v0a2(-0.01), Atp6v0a4(-0.04), Atp5b(-0.05), Atp6v0e2(-0.05), Atp5a1(-0.06), Atp6v1e1(-0.09), Atp6ap1(-0.09), Atp6v0d1(-0.11), Atp5e(-0.12), Atp5c1(-0.14), Atp6v0e(-0.14), Atp6v1h(-0.15), Atp5d(-0.17), Atp6v0b(-0.17), Atp6v1f(-0.24),
protein O-linked mannosylation	0.0233789	0.34732	9.11874e-06	0.000112805	15	0.010338	0.0325375	0.0175545	0.0321696	0.0711842	Dpm1(0.1), Dpm1(0.1), Fktn(-0.05), Ispd(-0.07), Large1(-0.08), Large1(-0.08), Fkrp(-0.1), Tmem5(-0.18), Large2(-0.18), Large2(-0.18), B4gat1(-0.21), Alg5(-0.23), Dpm3(-0.28), Dpm2(-0.29), Pomgnt2(-0.58),
protein K11-linked ubiquitination	0.015828	0.27181	9.19107e-06	0.000113303	26	0.0244603	0.0124905	0.00430666	0.144579	0.0464171	Ube2h(0.09), Anapc2(0.08), Ube2c(0.06), Cdc27(0.03), Anapc4(0.02), Ube2w(0.01), Ube2d3(0), Ube2b(-0.01), Ube2e3(-0.02), Park2(-0.02), Cdc26(-0.02), Ube2a(-0.03), Anapc10(-0.03), Anapc10(-0.03), Cdc23(-0.04), Anapc1(-0.05), Ube2e2(-0.06), Anapc7(-0.1), Anapc5(-0.1), Anapc11(-0.11), Rnf4(-0.16), Ube2s(-0.17), Anapc13(-0.18), Cdc16(-0.19), Ube2l3(-0.21), Ube2t(-0.24),
DNA helicase activity	0.0219439	0.326503	9.39236e-06	0.000115382	17	0.0177092	0.0365592	0.0253147	0.0239427	0.0409987	Chd8(0.14), Ino80(0.08), Mcm4(0.03), Fbxo18(0.01), Wrn(-0.04), Mcm3(-0.08), Recql(-0.09), Recql5(-0.1), Mcm6(-0.13), Mcm5(-0.15), Mcm2(-0.29), Supv3l1(-0.29), Mcm7(-0.33), Ruvbl1(-0.39), Peo1(-0.43), Peo1(-0.43), Ruvbl2(-0.51),
nucleotide metabolic process	0.0244163	0.278946	1.0964e-05	0.000134223	23	0.0109337	0.039006	0.0568685	0.0226625	0.031992	Nt5c1a(0.72), Acpp(0.44), Ampd3(0.32), Ada(0.24), Nt5c2(0.13), Nudt18(-0.03), Nt5c3b(-0.08), Itpa(-0.12), Ampd2(-0.12), Nudt16(-0.13), Fhit(-0.16), Nme7(-0.18), Nt5c3(-0.19), Gmpr2(-0.22), Adal(-0.23), Nt5m(-0.26), Nt5c(-0.32), Nme1(-0.34), Gmpr(-0.36), Nme4(-0.39), Nme6(-0.4), Nme2(-0.41), Dnph1(-0.7),
retrograde vesicle-mediated transport, Golgi to ER	0.0254773	0.245009	1.10789e-05	0.000135163	32	0.0861433	0.0282863	0.0155263	0.0368631	0.0116309	Atp9b(0.24), Htt(0.15), Cog3(0.14), Cog3(0.14), Gbf1(0.11), Copb2(0.09), Kif1c(0.07), Rab6a(0.07), Copa(0.06), Rab6b(0.05), Arf3(0.03), Ergic2(-0.01), Copb1(-0.01), Arcn1(-0.01), Nbas(-0.03), Arf5(-0.04), Cog4(-0.05), Cog4(-0.05), Scfd1(-0.06), Uvrag(-0.06), Arf4(-0.07), Scyl1(-0.08), Atp9a(-0.11), Cope(-0.11), Stx18(-0.11), Rer1(-0.15), Rer1(-0.15), Dnajc28(-0.16), Lman2(-0.18), Cog7(-0.21), Cog…
fatty acid metabolic process	0.00774753	0.133574	1.20251e-05	0.000146203	139	0.330692	0.265115	0.0140858	0.000970829	0.00101932	Ptgs2(1.16), Cpt1b(0.79), Acsl6(0.72), Tbxas1(0.55), Baat(0.54), Hpgds(0.5), Acsm5(0.49), Fabp4(0.48), Aloxe3(0.45), Alox12(0.42), Lpin2(0.41), Tnxb(0.33), Ptgs1(0.31), H2-Ke6(0.27), Acacb(0.27), Acsbg1(0.25), Prkab2(0.25), Per2(0.21), Ptges(0.21), Mgll(0.19), Acsl4(0.19), Aacs(0.19), Acox3(0.19), Acaca(0.18), Scd1(0.17), Pecr(0.15), Prkab1(0.12), Hpgd(0.11), Stat5a(0.1), Acadsb(0.1), Sgpl1(0.08)…
exonucleolytic nuclear-transcribed mRNA catabolic process involved in deadenylation-dependent decay	0.0267496	0.401219	1.21928e-05	0.000147733	11	0.0195674	0.0170091	0.0133557	0.0538737	0.0763015	Cnot6(0.14), Cnot8(0), Cnot7(-0.02), Exosc3(-0.04), Exosc3(-0.04), Exosc8(-0.19), Exosc9(-0.24), Exosc9(-0.24), Exosc2(-0.47), Exosc5(-0.48), Exosc7(-0.49),
endoplasmic reticulum-Golgi intermediate compartment	0.0203874	0.197165	1.22641e-05	0.00014809	53	0.34729	0.0128391	0.0275336	0.0110874	0.00459651	Fn1(0.4), Golgb1(0.37), Nat8f1(0.31), Rgmb(0.2), Golga3(0.18), Hspa5(0.17), Hspa5(0.17), Dicer1(0.16), Nucb2(0.15), Ptpn2(0.11), Gbf1(0.11), Stx17(0.07), Ist1(0.05), Nat8(0.04), Lman2l(0.03), Serpinh1(0.02), Uggt1(0.01), Sec22b(-0.01), Tmed9(-0.01), Gnpnat1(-0.02), Tmed10(-0.03), Cln8(-0.05), Pdia6(-0.05), Erp44(-0.06), Lman1(-0.07), Lman1(-0.07), Man1a(-0.08), Tmed3(-0.08), Scyl1(-0.08), P4hb(-0…
cell redox homeostasis	0.0217473	0.175868	1.36745e-05	0.000164559	59	0.152074	0.0373977	0.00393802	0.0279045	0.02275	Il6(1.24), Ero1lb(0.39), Sh3bgrl3(0.3), Ddit3(0.27), Glrx(0.26), Nnt(0.21), Nfe2l2(0.19), Tmx4(0.19), Txndc16(0.19), Krit1(0.18), Krit1(0.18), Aifm3(0.16), Nhlrc2(0.15), Qsox1(0.14), Tmx3(0.11), Pdilt(0.07), Gclc(0.05), Dnajc10(0.05), Vimp(0.04), Txnrd1(0.03), Txndc11(0.03), Ero1l(-0.02), Pdia3(-0.03), Txndc12(-0.04), Nxn(-0.05), Pdia6(-0.05), Erp44(-0.06), Txndc5(-0.06), Aifm1(-0.08), Egln2(-0.0…
nuclear pore outer ring	0.0272691	0.341672	1.48128e-05	0.000177654	15	0.0424037	0.04395	0.0280008	0.0125663	0.0393623	Nup98(0.24), Ahctf1(0.15), Nup160(0.13), Nup107(-0.09), Nup107(-0.09), Seh1l(-0.1), Nup133(-0.15), Nup133(-0.15), Sec13(-0.18), Nup85(-0.19), Nup85(-0.19), Nup43(-0.38), Nup43(-0.38), Nup37(-0.45), Nup37(-0.45),
tRNA-splicing ligase complex	0.0236462	0.400868	1.51301e-05	0.000180846	11	0.020867	0.161916	0.00913211	0.0634899	0.00778935	AI597479(0.07), AI597479(0.07), Fam98c(-0.01), Ddx1(-0.1), Fam98b(-0.12), Fam98b(-0.12), Zbtb8os(-0.19), Zbtb8os(-0.19), 2700060E02Rik(-0.23), Rtcb(-0.25), Fam98a(-0.31),
purine nucleotide biosynthetic process	0.024691	0.311983	1.60608e-05	0.000191323	18	0.0561212	0.00924618	0.0608	0.0680042	0.0103178	Adssl1(0.57), Mthfd2l(0.04), Impdh1(0.02), Gmps(-0.04), Mthfd1(-0.07), Paics(-0.13), Hprt(-0.15), Prps1(-0.2), Pfas(-0.2), Nt5e(-0.21), Oasl2(-0.22), Impdh2(-0.25), Impdh2(-0.25), Adss(-0.3), Gart(-0.38), Oas1a(-0.38), Adsl(-0.39), Atic(-0.58),
fatty-acyl-CoA binding	0.00610237	0.300275	1.67325e-05	0.000198656	35	0.645692	0.224845	0.00816384	0.000117192	0.0024474	Soat2(0.39), Acbd3(0.23), Acox3(0.19), Acad10(0.15), Acadsb(0.1), Ivd(0.06), Scp2(0.04), Eci3(0.04), Soat1(0), Acbd5(0), Pitpna(-0.04), Acadl(-0.05), Acadl(-0.05), Gcdh(-0.06), Gcdh(-0.06), Acadvl(-0.08), Acadvl(-0.08), Etfa(-0.08), Acad11(-0.09), Hnf4a(-0.1), Hadha(-0.1), Acadm(-0.13), Acadm(-0.13), Eci2(-0.14), Hadhb(-0.15), Acad8(-0.18), Acot7(-0.19), Acad9(-0.19), Acox1(-0.2), Acox2(-0.21), H…
8-oxo-7,8-dihydroguanosine triphosphate pyrophosphatase activity	0.025236	0.366227	1.72438e-05	0.000204042	13	0.0495403	0.130758	0.00553473	0.0551317	0.00935464	Entpd7(0.29), Rhobtb3(0.16), Nudt19(-0.04), Nudt4(-0.13), Dxo(-0.13), Nudt17(-0.17), Lsg1(-0.27), Nudt7(-0.3), Nudt6(-0.36), Entpd2(-0.39), Nudt8(-0.43), Nudt1(-0.45), Nudt1(-0.45),
intraciliary transport particle B	0.0170327	0.287206	1.76918e-05	0.000208645	22	0.00033604	0.0227211	0.141759	0.0861299	0.0794072	Trim59(0.25), Ift172(0.06), Traf3ip1(0.05), Ift46(0.04), Ift57(0.03), Kif17(-0.02), Ift74(-0.04), Ift80(-0.04), Ift88(-0.05), Rabl2(-0.08), Ttc26(-0.08), Ift81(-0.16), Ift22(-0.17), Ift52(-0.17), Ift20(-0.18), Hspb11(-0.27), Hspb11(-0.27), Cluap1(-0.35), Ift27(-0.36), Ift27(-0.36), Ttc30b(-0.37), Ttc30a1(-0.52),
nuclease activity	0.0129945	0.132099	1.81974e-05	0.000213895	109	0.0255886	0.0640041	0.0107753	0.0568272	0.0299782	Rnasel(0.8), Ang(0.64), Noct(0.59), Zc3h12a(0.46), Endou(0.45), Zc3h12c(0.42), Dnase1(0.35), Ago2(0.33), Ercc1(0.29), Rnase4(0.29), Endod1(0.23), Xrn1(0.22), Tdp2(0.22), Ercc5(0.2), Pan2(0.2), Dclre1c(0.19), Elac1(0.18), Cmbl(0.17), Pgap1(0.17), Fen1(0.16), Dicer1(0.16), Cnot6(0.14), Gdpd1(0.12), Smg6(0.12), Rbbp8(0.08), Ercc4(0.07), Fancm(0.07), Gdpd5(0.07), Eme2(0.06), Pms2(0.05), Tatdn3(0.04),…
telomerase RNA binding	0.0239802	0.311071	1.83659e-05	0.000215161	18	0.051733	0.0143759	0.0554041	0.0280816	0.0281276	Smg7(0.16), Hnrnpu(0.14), Smg6(0.12), Smg6(0.12), Tep1(0.02), Smg5(-0.06), Hnrnpc(-0.1), Wrap53(-0.1), Tert(-0.11), Tert(-0.11), Snrpb(-0.17), Naf1(-0.2), Snrpd3(-0.23), Pinx1(-0.25), Nop10(-0.48), Nop10(-0.48), Dkc1(-0.64), Nhp2(-0.79),
mitochondrial electron transport, NADH to ubiquinone	0.0207292	0.390189	1.85839e-05	0.000216997	13	0.0676122	0.0163674	0.0658709	0.0282586	0.0146643	ND2(0.05), ND4(0.02), Bdnf(-0.01), Dld(-0.09), Ndufb9(-0.09), Ndufc2(-0.09), Ndufs6(-0.09), Ndufa10(-0.12), Ndufv2(-0.16), Ndufv2(-0.16), Coq9(-0.18), Ndufb8(-0.22), Ndufa7(-0.25),
retromer complex	0.0257852	0.287714	1.90224e-05	0.000221385	23	0.0544888	0.0449262	0.00686722	0.0439093	0.0409008	Dennd5a(0.23), Dennd4c(0.15), Dctn1(0.1), Fam21(0.07), Sdccag3(0.06), Ankfy1(0), Snx6(-0.03), Snx1(-0.04), Rab7(-0.06), Vps26b(-0.09), Snx2(-0.12), Snx3(-0.13), Snx8(-0.14), Vps26a(-0.15), Vps26a(-0.15), Vps35(-0.15), Vps35(-0.15), Snx27(-0.17), Tbc1d5(-0.19), Vps29(-0.22), Vps29(-0.22), Trim27(-0.24), Snx5(-0.4),
mRNA export from nucleus	0.0244738	0.217925	2.01851e-05	0.000234147	42	0.28192	0.0127826	0.0103644	0.0275026	0.0162495	BC005561(0.33), Hhex(0.31), Smg7(0.16), Ddx19b(0.16), Thoc2(0.16), Nup160(0.13), Nup160(0.13), Smg6(0.12), Alkbh5(0.12), Alkbh5(0.12), Nxf1(0.1), Hnrnpa2b1(0.1), Sarnp(0.03), Nup214(0.03), Nup88(0.01), Fyttd1(-0.01), Thoc1(-0.01), Shfm1(-0.02), Rbmx2(-0.06), Smg5(-0.06), Ddx19a(-0.08), Ddx39(-0.09), Ddx39(-0.09), Nup107(-0.09), Nup107(-0.09), Gle1(-0.1), Ncbp1(-0.1), Ddx39b(-0.11), Ddx39b(-0.11),…
3'-5' exonuclease activity	0.0178081	0.2863	2.26079e-05	0.000261394	23	0.0171971	0.0587547	0.00171491	0.0653907	0.157933	Rev3l(0.19), Polg(0.03), Pola1(0), Exosc10(0), Rad9a(-0.01), Rad9a(-0.01), Rad50(-0.02), Rad50(-0.02), Wrn(-0.04), Wrn(-0.04), Rad9b(-0.06), Mre11a(-0.08), Pole(-0.09), Aplf(-0.1), Exd2(-0.11), Exd2(-0.11), Eri1(-0.19), Pold1(-0.27), Rad1(-0.37), Rad1(-0.37), Rexo2(-0.37), Exd1(-0.37), Apex1(-0.61),
positive regulation of release of cytochrome c from mitochondria	0.0280309	0.251359	2.36318e-05	0.000272344	27	0.0854224	0.0469989	0.029243	0.0265241	0.0129639	Mmp9(0.59), Bmf(0.48), Bcl2l11(0.46), Plaur(0.24), Fas(0.19), Pink1(0.06), Pdcd5(0.05), Gper1(0.03), Bik(0.01), Dnm1l(0.01), Cideb(-0.08), Bnip3(-0.09), Bad(-0.16), Bak1(-0.18), Mllt11(-0.18), Pycard(-0.18), Apopt1(-0.2), Bbc3(-0.2), Tnfsf10(-0.22), Fam162a(-0.25), Fam162a(-0.25), Bax(-0.34), Pla2g6(-0.34), Trp53(-0.49), Ppif(-0.52), Bid(-0.62), Bid(-0.62),
flavonoid glucuronidation	0.00918977	0.44991	2.54398e-05	0.000291282	12	0.0939053	0.219392	0.00602557	0.000499588	0.121644	Ugt2b34(0.03), Ugt1a6a(-0.12), Ugt1a2(-0.23), Ugt1a2(-0.23), Ugt3a2(-0.23), Ugt3a1(-0.24), Ugt2b38(-0.27), Ugt1a1(-0.35), Ugt1a1(-0.35), Ugt8a(-0.36), Ugt1a10(-0.56), Ugt2b37(-0.69),
ribosome binding	0.0202738	0.192279	2.65248e-05	0.000302724	49	0.390237	0.0470277	0.010479	0.00397132	0.0169464	Cpeb4(0.51), Zc3h12a(0.46), Rictor(0.31), Cpeb2(0.31), Letm2(0.23), Cpeb3(0.2), Hspa5(0.17), Sbds(0.16), Sec61a2(0.12), Mtor(0.09), Mtrf1l(0.09), Gcn1l1(0.09), Fmr1(0.07), Impact(0.07), Bag6(0.06), Dnajc1(0.03), Ythdf1(0.03), Eif5a2(0), Naa15(-0.01), Efl1(-0.02), Pttg1(-0.03), Letm1(-0.03), Sec61a1(-0.04), Ighmbp2(-0.07), Ighmbp2(-0.07), Rpn2(-0.08), Eif3c(-0.08), Eef2(-0.1), Sec61b(-0.11), Stau2…
tRNA guanylyltransferase activity	0.0306709	0.410335	2.67284e-05	0.000304067	10	0.0129426	0.0432734	0.0297133	0.0595948	0.0496125	Rev1(0.07), Primpol(0.04), Ispd(-0.07), Prim2(-0.12), Uap1l1(-0.22), Thg1l(-0.29), Thg1l(-0.29), Prim1(-0.31), Ctu1(-0.35), Nudt5(-0.36),
protein stabilization	0.0273375	0.114448	2.68397e-05	0.000304356	131	0.0260869	0.0143053	0.0803465	0.0369399	0.0435526	Pim1(0.63), Sox4(0.54), Sox4(0.54), Rassf2(0.47), Flna(0.42), Smad7(0.41), Smad3(0.4), Per3(0.4), Plpp3(0.36), Plpp3(0.36), Bag3(0.35), Apbb2(0.34), Ep300(0.33), Clu(0.29), Usp2(0.25), Tnip2(0.25), Aak1(0.25), Tsc1(0.23), Sox17(0.22), Usp13(0.22), Gpihbp1(0.21), Stxbp1(0.2), Creb1(0.19), Pik3r1(0.19), Usp33(0.19), Tspan1(0.18), Fbxw7(0.17), Cog3(0.14), Gnaq(0.12), Igf1(0.12), Usp7(0.11), Morc3(0.…
DNA-3-methylbase glycosylase activity	0.0202087	0.419373	2.81458e-05	0.000315126	10	0.0246039	0.0399456	0.0506852	0.00504268	0.140677	Mbd4(0.2), Mutyh(0), Smug1(-0.13), Macrod2(-0.14), Neil1(-0.26), Macrod1(-0.27), Neil2(-0.32), Nthl1(-0.36), Ogg1(-0.59), Dnph1(-0.7),
nicotinamide riboside hydrolase activity	0.0202087	0.419373	2.81458e-05	0.000315126	10	0.0246039	0.0399456	0.0506852	0.00504268	0.140677	Mbd4(0.2), Mutyh(0), Smug1(-0.13), Macrod2(-0.14), Neil1(-0.26), Macrod1(-0.27), Neil2(-0.32), Nthl1(-0.36), Ogg1(-0.59), Dnph1(-0.7),
nicotinic acid riboside hydrolase activity	0.0202087	0.419373	2.81458e-05	0.000315126	10	0.0246039	0.0399456	0.0506852	0.00504268	0.140677	Mbd4(0.2), Mutyh(0), Smug1(-0.13), Macrod2(-0.14), Neil1(-0.26), Macrod1(-0.27), Neil2(-0.32), Nthl1(-0.36), Ogg1(-0.59), Dnph1(-0.7),
deoxyribonucleoside 5'-monophosphate N-glycosidase activity	0.0202087	0.419373	2.81458e-05	0.000315126	10	0.0246039	0.0399456	0.0506852	0.00504268	0.140677	Mbd4(0.2), Mutyh(0), Smug1(-0.13), Macrod2(-0.14), Neil1(-0.26), Macrod1(-0.27), Neil2(-0.32), Nthl1(-0.36), Ogg1(-0.59), Dnph1(-0.7),
purine-specific mismatch base pair DNA N-glycosylase activity	0.0240103	0.395023	3.07504e-05	0.000343202	11	0.0408928	0.0290969	0.0495571	0.00573698	0.125457	Mbd4(0.2), Mutyh(0), Pcna(-0.11), Smug1(-0.13), Macrod2(-0.14), Neil1(-0.26), Macrod1(-0.27), Neil2(-0.32), Nthl1(-0.36), Ogg1(-0.59), Dnph1(-0.7),
intra-Golgi vesicle-mediated transport	0.0313563	0.263001	3.10605e-05	0.000345572	26	0.13521	0.037292	0.00859429	0.0547765	0.0184619	Cog3(0.14), Rab33b(0.12), Gosr2(0.11), Cux1(0.09), Copb2(0.09), Copb2(0.09), Rab6a(0.07), Copa(0.06), Rab6b(0.05), Nsf(0.03), Gosr1(0.03), Cog2(0.02), Cog2(0.02), Copb1(-0.01), Copb1(-0.01), Trappc10(-0.01), Cog1(-0.05), Vti1b(-0.09), Cog5(-0.09), Cope(-0.11), Vti1a(-0.13), Gabarapl2(-0.13), Copz1(-0.14), Cog6(-0.14), Copg2(-0.16), Cog8(-0.21),
rRNA transcription	0.0294879	0.373513	3.12461e-05	0.000346548	12	0.0740803	0.0592473	0.0135081	0.0700894	0.0119782	Ang(0.64), Spin1(0.19), Top1(0.13), Rnasek(0.09), Sirt7(-0.01), Npm3(-0.24), Cd3eap(-0.32), Polr1a(-0.33), Mars(-0.42), Trp53(-0.49), Polr1b(-0.59), Polr1b(-0.59),
nucleocytoplasmic transport	0.0301252	0.235959	3.21759e-05	0.000355744	30	0.0167033	0.0117764	0.0501123	0.0350085	0.138115	Camk4(0.54), Mlxip(0.26), Tpr(0.22), Nsrp1(0.12), Zfp384(0.11), Rgs14(0.02), Rgs14(0.02), Nup54(0.02), Adam10(0.01), Axin1(0.01), Ankrd54(0.01), Anp32e(-0.05), Xpo7(-0.06), Cdk5(-0.09), Camk1(-0.1), Camk1(-0.1), Anp32a(-0.11), Nupl1(-0.12), Nup155(-0.13), Rsrc1(-0.14), Fbxo22(-0.16), Mlx(-0.18), Ranbp17(-0.23), Anp32b(-0.32), Aaas(-0.32), Aaas(-0.32), Ran(-0.46), Npm1(-0.47), Npm1(-0.47), Mybbp1a…
pyrophosphatase activity	0.0280777	0.298834	3.36866e-05	0.000371287	19	0.0341676	0.110199	0.0236283	0.0708962	0.00797257	Prune2(0.36), Entpd7(0.29), Rhobtb3(0.16), Alpl(0.09), Alpl(0.09), Nudt19(-0.04), Gmps(-0.04), Cant1(-0.08), Nudt4(-0.13), Dxo(-0.13), Nudt17(-0.17), Lsg1(-0.27), Prune1(-0.29), Nudt7(-0.3), Ppa1(-0.35), Nudt6(-0.36), Entpd2(-0.39), Dctpp1(-0.41), Nudt8(-0.43),
peptide alpha-N-acetyltransferase activity	0.0255522	0.380505	3.60659e-05	0.000396276	12	0.145445	0.0296534	0.00400667	0.0818362	0.0294556	Naa30(0.12), Naa30(0.12), Naa15(-0.01), Naa60(-0.03), Naa60(-0.03), Naa16(-0.15), Naa16(-0.15), Naa50(-0.22), Naa50(-0.22), Naa20(-0.26), Naa25(-0.31), Naa10(-0.44),
ATP-dependent 5'-3' DNA helicase activity	0.0307714	0.331763	4.01424e-05	0.000438345	15	0.119127	0.101332	0.00654525	0.0433449	0.0149936	Entpd7(0.29), Rhobtb3(0.16), Nudt19(-0.04), Ighmbp2(-0.07), Helb(-0.07), Nudt4(-0.13), Dxo(-0.13), Nudt17(-0.17), Lsg1(-0.27), Nudt7(-0.3), Nudt6(-0.36), Entpd2(-0.39), Ruvbl1(-0.39), Nudt8(-0.43), Ruvbl2(-0.51),
glutathione peroxidase activity	0.00943979	0.314286	4.03997e-05	0.000439743	23	0.795599	0.126077	0.0303878	0.000584606	0.000370317	Gpx6(1.66), Gpx7(0.21), Gpx8(0.17), Gstk1(0.05), Gstk1(0.05), Ltc4s(-0.05), Gstt1(-0.07), Gpx3(-0.09), Gpx3(-0.09), Mgst1(-0.12), Gstm7(-0.12), Gstt2(-0.13), Gstz1(-0.18), Gpx1(-0.21), Gpx1(-0.21), Gpx1(-0.21), Mgst3(-0.27), Mgst3(-0.27), Prdx6(-0.3), Gpx4(-0.3), Gpx4(-0.3), Gstp1(-0.65), Gstp2(-0.66),
U5 snRNP	0.0312021	0.28665	4.0519e-05	0.000439743	20	0.11934	0.0276467	0.0867345	0.00334726	0.0499472	Snrnp200(0.23), Prpf8(0.13), Prpf8(0.13), Prpf6(0.06), Prpf18(0.03), Cd2bp2(0.01), Cd2bp2(0.01), Ddx23(0), Ddx23(0), Snrpn(-0.13), Snrnp40(-0.13), Snrpe(-0.14), Snrpb(-0.17), Txnl4a(-0.23), Txnl4a(-0.23), Snrpd3(-0.23), Txnl4b(-0.28), Snrpg(-0.33), Snrpd1(-0.35), Snrpd2(-0.38),
DNA duplex unwinding	0.023	0.328045	4.43973e-05	0.00048036	17	0.104188	0.0261402	0.00944083	0.0236212	0.108778	Anxa1(0.33), Ascc3(0.03), Rad50(-0.02), Rad50(-0.02), Pot1a(-0.03), Wrn(-0.04), Nbn(-0.07), Nbn(-0.07), Mre11a(-0.08), Recql(-0.09), Ddx1(-0.1), Rtel1(-0.1), Xrcc5(-0.18), Supv3l1(-0.29), Xrcc6(-0.37), Recql4(-0.54), Recql4(-0.54),
nuclear origin of replication recognition complex	0.0204723	0.392776	4.4861e-05	0.000483897	12	0.0291495	0.00407346	0.0710922	0.344119	0.00938724	Orc1(0.24), Orc4(0.02), Orc4(0.02), Orc6(-0.02), Orc3(-0.1), Orc3(-0.1), Orc2(-0.22), Orc2(-0.22), Orc5(-0.24), Orc5(-0.24), Lrwd1(-0.27), Mcm2(-0.29),
regulation of protein stability	0.0326352	0.166155	4.77565e-05	0.000513564	62	0.259497	0.020739	0.00900696	0.0345073	0.0316391	Sox4(0.54), Dact1(0.4), Ubr5(0.28), Cdkn2aip(0.27), Bcl2(0.24), Hspa8(0.24), Prkd1(0.18), Kras(0.13), Usp7(0.11), Usp4(0.1), Srebf1(0.09), Trim24(0.08), Trim24(0.08), Usp19(0.07), Usp28(0.07), Rnf149(0.06), Vps11(0.05), Otud5(0.04), Ift46(0.04), Hdac6(0.02), Pten(0.02), Ccar2(0.02), Gnl3l(0.02), Sh3glb1(0.01), Usp3(0.01), Apoa2(-0.01), Sumo1(-0.01), Aptx(-0.02), Elmod1(-0.02), Hdac3(-0.03), Lamp2…
nuclear export signal receptor activity	0.0335959	0.403496	5.1035e-05	0.000547157	10	0.0315561	0.0138491	0.0854137	0.044685	0.0593456	Nup214(0.03), Xpo7(-0.06), Xpo7(-0.06), Xpo4(-0.12), Xpo5(-0.17), Cse1l(-0.19), Xpo1(-0.2), Ranbp17(-0.23), Nupl2(-0.3), Nupl2(-0.3),
NADH metabolic process	0.0307495	0.380243	5.50551e-05	0.000588474	12	0.287805	0.123068	0.0150099	0.00848522	0.008883	Ogdh(0.08), Gpd2(0.03), Mdh1(0.01), Mdh1(0.01), Vcp(-0.04), Dlst(-0.08), Idh3g(-0.09), Mdh2(-0.09), Idh3b(-0.12), Gpd1(-0.24), Idh3a(-0.33), Gpd1l(-0.36),
glutathione biosynthetic process	0.0140059	0.388982	5.62735e-05	0.000599686	13	0.554399	0.432717	0.00160776	0.00104267	0.00496208	Ggt7(0.18), Ggt5(0.07), Gclc(0.05), Gclc(0.05), Gclc(0.05), Ggct(-0.12), Ggt1(-0.16), Gss(-0.21), Gclm(-0.26), Gclm(-0.26), Hagh(-0.26), Hagh(-0.26), Ggt6(-0.59),
integral component of mitochondrial outer membrane	0.0335464	0.283345	5.72864e-05	0.000608647	20	0.0668503	0.058017	0.0687534	0.0319494	0.0133388	Armcx3(0.37), Cpt1a(0.07), Pink1(0.06), Synj2bp(-0.02), Rhot2(-0.02), Tomm7(-0.04), Fundc1(-0.05), Fundc1(-0.05), Dmpk(-0.06), Dmpk(-0.06), Bnip3(-0.09), Mul1(-0.12), Fis1(-0.14), Rhot1(-0.15), Bak1(-0.18), Tomm22(-0.23), Abcb6(-0.3), Tomm20(-0.31), Fundc2(-0.32), Tomm40(-0.38),
microtubule severing	0.0349815	0.424063	5.91865e-05	0.000626951	10	0.189361	0.0161796	0.0643908	0.0432754	0.00926937	Katna1(0.03), Katna1(0.03), Katnb1(-0.03), Spast(-0.09), Spast(-0.09), Spast(-0.09), Spast(-0.09), Katnal1(-0.11), Ttll11(-0.24), Ttll11(-0.24),
myelin sheath	0.0105653	0.128389	5.95118e-05	0.000627627	183	0.181321	0.00467566	0.10587	0.0517229	0.0132696	Itpr3(0.62), Prx(0.56), Gnao1(0.53), Gnao1(0.53), Ncam1(0.52), Cntnap1(0.44), Glul(0.37), Glul(0.37), Atp1a2(0.35), Tubb4a(0.34), Ubc(0.34), Tuba1a(0.31), Tuba1a(0.31), Cnrip1(0.31), Hspa2(0.29), Nefm(0.29), Car2(0.28), Gsn(0.28), Plcb1(0.27), Dpysl2(0.26), Dpysl2(0.26), Itpr2(0.26), Actg1(0.25), Cntn1(0.25), Erbb2(0.25), Pkm(0.25), Rtn4(0.25), Bcl2(0.24), Hspa8(0.24), Hsp90aa1(0.24), Hsp90aa1(0.…
acid phosphatase activity	0.0224919	0.365688	6.26369e-05	0.000657594	13	0.109367	0.0692933	0.0173355	0.0062848	0.10425	Acpp(0.44), Acpp(0.44), Acp6(-0.1), Ppip5k1(-0.1), Acp1(-0.18), Acp2(-0.19), Acp2(-0.19), Acp2(-0.19), Pxylp1(-0.19), Ppip5k2(-0.24), Minpp1(-0.29), Acp5(-0.45), Acp5(-0.45),
COP9 signalosome	0.0286549	0.215154	6.29995e-05	0.000659445	39	0.186464	0.0655562	0.0396434	0.00893633	0.0202016	Amotl1(0.47), Hspa1l(0.44), Nod2(0.4), Epb41l2(0.39), Myh9(0.39), Plcg1(0.2), Dock7(0.19), Hspa5(0.17), Tmod1(0.16), Basp1(0.11), Nckipsd(0.07), Hsp90ab1(0.05), Grb2(0.03), Grb2(0.03), Atp5a1(-0.06), Gps1(-0.07), Gps1(-0.07), Amot(-0.08), Cops2(-0.11), Dynll1(-0.12), Vprbp(-0.12), Flot1(-0.13), Cops4(-0.13), Cops4(-0.13), Wdr6(-0.13), Cops8(-0.13), Cops8(-0.13), Cops8(-0.13), Cops5(-0.15), Cops5(…
voltage-gated potassium channel activity	0.018628	0.290843	6.40306e-05	0.000666295	33	0.0020742	0.459726	0.176776	0.028747	0.00280747	Kcnc2(0.86), Kcnt1(0.65), Kcnab1(0.53), Kcne4(0.47), Kcna5(0.4), Kcnab2(0.37), Kcnh2(0.35), Kcnh2(0.35), Kcns3(0.3), Kcnt2(0.29), Kcnd3(0.27), Kcnq1(0.14), Kcnq1(0.14), Kcnb1(0.06), Kcnf1(0.04), Kcnk5(0.03), Kcnd1(0.01), Kcnh7(0), Kcnh7(0), Kcnk2(-0.14), Kcnq4(-0.16), Kcnc3(-0.18), Kcnma1(-0.18), Kcnma1(-0.18), Kcnma1(-0.18), Hcn3(-0.22), Hcn3(-0.22), Kcnh1(-0.26), Hcn2(-0.54), Hcn2(-0.54), Kcna1…
ciliary basal body	0.0130456	0.144182	6.6789e-05	0.00069296	117	0.00236623	0.0798168	0.0882589	0.0241452	0.162584	Pcnt(0.41), Irs1(0.4), Ttbk2(0.33), Pkd2(0.3), Pkd2(0.3), Ccsap(0.29), Ccsap(0.29), Akap9(0.29), Rttn(0.28), Ahi1(0.23), Ahi1(0.23), Jade1(0.22), Lca5(0.21), Cep290(0.2), Topors(0.19), Topors(0.19), Evc(0.18), Ick(0.15), Cyld(0.15), Bbs1(0.12), Bbs1(0.12), Mark4(0.12), Rp2(0.1), Rp2(0.1), Bbs4(0.1), Alms1(0.1), Alms1(0.1), C2cd3(0.1), Tapt1(0.09), Ift122(0.08), Nedd1(0.06), Ezr(0.06), Bbs2(0.06),…
dynactin complex	0.0374716	0.400575	7.15414e-05	0.000740098	11	0.188503	0.0318905	0.014275	0.0450037	0.0299769	Dctn1(0.1), Dctn4(0.01), Actr10(-0.03), Dctn6(-0.05), Actr1b(-0.06), Actr1a(-0.08), Dctn3(-0.14), Dctn3(-0.14), Dctn2(-0.17), Dctn2(-0.17), Dctn5(-0.19),
mitotic metaphase plate congression	0.0318119	0.243858	7.51942e-05	0.000775619	27	0.100147	0.0136412	0.00878985	0.115632	0.0783847	Chmp4c(0.3), Cul3(0.14), Vps4b(0.09), Rab11a(0.09), Chmp4b(0.07), Chmp2a(-0.01), Zw10(-0.02), Becn1(-0.02), Cdc23(-0.04), Chmp7(-0.05), Cenpe(-0.06), Chmp5(-0.08), Pibf1(-0.09), Vps4a(-0.09), Seh1l(-0.1), Kpnb1(-0.12), Chmp1a(-0.12), Chmp2b(-0.14), Kif18a(-0.18), Kif18a(-0.18), Cdca8(-0.22), Pinx1(-0.25), Chmp6(-0.29), Rrs1(-0.31), Spdl1(-0.33), Kif22(-0.5), Psrc1(-0.52),
mitochondrial fission	0.033035	0.287807	8.05453e-05	0.000828399	19	0.0490841	0.0111625	0.0496993	0.144972	0.0365037	Ppp2r2b(0.21), Dnm3(0.06), Dnm2(0.05), Dnm1(0.01), Dnm1l(0.01), Dnm1l(0.01), Mtfr2(-0.06), Opa1(-0.07), Ggnbp1(-0.08), Mtfr1(-0.09), Mff(-0.1), Mul1(-0.12), Fis1(-0.14), Fis1(-0.14), Mief1(-0.17), Mtfr1l(-0.2), Cox10(-0.27), Mtfp1(-0.44), Mtfp1(-0.44),
glycosylphosphatidylinositol-N-acetylglucosaminyltransferase (GPI-GnT) complex	0.0333233	0.348408	8.59971e-05	0.000881907	13	0.0272687	0.0596249	0.0785112	0.113146	0.0108606	Piga(0.13), Pigp(0.01), Pigp(0.01), Pigh(-0.01), Pigh(-0.01), Pigq(-0.07), Pigq(-0.07), Pigc(-0.13), Pigc(-0.13), Pyurf(-0.27), Pyurf(-0.27), Dpm2(-0.29), Pigyl(-0.57),
protein heterotetramerization	0.038275	0.303064	9.1968e-05	0.000940412	17	0.169479	0.0110315	0.0860125	0.0622237	0.0133612	Insr(0.32), Rrm2(0.15), Nup54(0.02), Anxa2(0.01), Aldoc(-0.01), Agrn(-0.05), Rrm1(-0.05), Nupl1(-0.12), Pdss2(-0.17), Pdss1(-0.21), S100a10(-0.23), Lrp4(-0.25), Farsa(-0.29), Xrcc6(-0.37), Hist1h4h(-0.39), Farsb(-0.48), Hist1h4i(-0.68),
oxidoreductase activity, acting on NAD(P)H	0.0305999	0.427375	9.69612e-05	0.000988613	10	0.26748	0.0774612	0.0802112	0.00441907	0.0116441	Ndufa5(-0.03), Ndufs1(-0.04), Miox(-0.06), Ndufs2(-0.06), Ndufv1(-0.08), Aifm1(-0.08), Ndufs4(-0.1), Ndufs3(-0.11), Ndufs8(-0.2), Ecsit(-0.27),
cellular protein metabolic process	0.0315523	0.398721	9.89761e-05	0.00100626	11	0.164812	0.22308	0.0164339	0.0232164	0.00694783	Gigyf2(-0.01), Psen1(-0.02), Psen1(-0.02), Psen1(-0.02), Cln8(-0.05), Hexb(-0.14), Psen2(-0.15), Mmp13(-0.18), D2hgdh(-0.18), D2hgdh(-0.18), L2hgdh(-0.41),
ATP hydrolysis coupled proton transport	0.0320235	0.260925	0.000101213	0.00102605	29	0.145361	0.066306	0.0675702	0.0112023	0.0243523	Atp1a2(0.35), Atp1a2(0.35), Atp6v1g3(0.32), Atp6v0d2(0.14), Atp1a3(0.12), Atp6v0a1(0.09), Atp4a(0.08), Atp1a1(0.02), Atp6v0c(0.02), Atp6v1a(0.01), Atp6v0a2(-0.01), Atp6v0a4(-0.04), Atp6v0a4(-0.04), Atp5b(-0.05), Atp6v0e2(-0.05), Atp5a1(-0.06), Atp6v1c2(-0.07), Atp6v1e1(-0.09), Atp6ap1(-0.09), Atp6v0d1(-0.11), Atp6v1c1(-0.11), Atp5g3(-0.11), Atp6v0e(-0.14), Atp6v1h(-0.15), Atp6v0b(-0.17), Atp6v1b2…
peroxisome fission	0.0363266	0.374334	0.000103483	0.00104382	11	0.0244939	0.0704395	0.0858269	0.0627784	0.0251959	Sec16b(0.21), Dnm1l(0.01), Pex11b(-0.12), Pex11b(-0.12), Pex11g(-0.12), Pex19(-0.14), Fis1(-0.14), Fis1(-0.14), Acot8(-0.24), Pex11a(-0.67), Pex11a(-0.67),
ribosomal protein import into nucleus	0.0390097	0.373447	0.000103642	0.00104382	11	0.0120131	0.0493721	0.0272876	0.0918622	0.127885	Tnpo1(0.13), Ipo11(0.01), Ranbp6(0), Ipo9(-0.04), Tnpo2(-0.09), Kpnb1(-0.12), Kpnb1(-0.12), Ipo5(-0.21), Ipo5(-0.21), Ipo4(-0.47), Ipo4(-0.47),
Golgi transport complex	0.0390851	0.298893	0.000103851	0.00104382	18	0.141169	0.0240095	0.0331889	0.0931177	0.0185501	Golga3(0.18), Cog3(0.14), Cog3(0.14), Cog2(0.02), Cog2(0.02), Cog1(-0.05), Cog4(-0.05), Cog4(-0.05), Scfd1(-0.06), Cog5(-0.09), Cog5(-0.09), Cog6(-0.14), Cog6(-0.14), Dnajc28(-0.16), Cog8(-0.21), Cog8(-0.21), Cog7(-0.21), Cog7(-0.21),
protein serine/threonine phosphatase activity	0.0392484	0.192797	0.000112614	0.00112869	52	0.0299568	0.0236743	0.036754	0.105187	0.0898257	Pdp1(0.23), Ppp2r2b(0.21), Phlpp1(0.21), Mtmr3(0.17), Cdc14a(0.17), Ppp1r15b(0.16), Ppm1b(0.12), Phlpp2(0.12), Ppp2cb(0.11), Ppm1d(0.11), Cdc14b(0.11), Cdc14b(0.11), Ppm1f(0.1), Ppm1j(0.07), Ppm1k(0.07), Ppm1l(0.04), Lck(0.03), Ppp1cc(0.03), Ppp1cc(0.03), Mtmr4(0.03), Ppp1cb(0.02), Pten(0.02), Ppp2r2a(0.01), Ppp2r2a(0.01), Ppp2ca(0), Ppp2ca(0), Ppp6c(0), Ppp2r1a(-0.02), Ppp3cb(-0.03), Ppm1h(-0.03…
chaperone binding	0.0308446	0.147301	0.000117314	0.00117248	76	0.45632	0.0709774	0.0391777	0.00283409	0.016987	Dnajb1(0.56), Dnajb4(0.47), Dnaja1(0.44), Dnajb5(0.4), Bag3(0.35), Atp1a2(0.35), Birc5(0.33), Ctsc(0.31), Tsc1(0.23), Usp13(0.22), Dnajb2(0.19), Atp7a(0.17), Dnaja4(0.17), Bag4(0.16), Lbr(0.16), Cdkn1b(0.14), Hes1(0.12), Vwf(0.12), Atp1a3(0.12), Ogdh(0.08), Grpel2(0.05), Dnajb6(0.05), Dnajc10(0.05), Dnajc10(0.05), Cp(0.04), Dnajc1(0.03), Gnb5(0.03), Cdc37l1(0.03), Fgb(0.03), Atp1a1(0.02), Bag5(0.…
GPI-anchor transamidase activity	0.0349513	0.219519	0.000122523	0.00122109	33	0.131852	0.205446	0.00858195	0.037668	0.0179119	Ndst2(0.26), Mest(0.25), Dcp1a(0.21), Ndst1(0.18), Lactb2(0.14), Dcp1b(0.03), Abhd14b(0), Abhd17b(0), Aptx(-0.02), Dffb(-0.03), Abhd14a(-0.03), Pnkd(-0.04), Hint2(-0.05), Nudt13(-0.06), Abhd13(-0.06), Abhd17c(-0.06), Abhd4(-0.08), Pigs(-0.11), Gpaa1(-0.12), Abhd16a(-0.13), Pigk(-0.14), Pigk(-0.14), Hint3(-0.15), Rbbp9(-0.16), Fahd2a(-0.17), Mblac2(-0.17), Pigt(-0.17), Pigu(-0.17), Abhd8(-0.24), H…
response to ionizing radiation	0.0335884	0.189827	0.000133931	0.00133104	43	0.0394079	0.0952643	0.00893168	0.0970086	0.0784441	Xrcc3(0.41), Trp53bp2(0.29), Clk2(0.19), Dclre1c(0.19), Rnf8(0.13), Eya3(0.07), Uimc1(0.07), Rfwd3(0.07), Usp28(0.07), Rad54l(0.05), Rad54l(0.05), Inip(0.03), Stk11(0.02), Rnf168(0.02), Kat5(0.02), Rfwd2(0.01), Nabp1(0), Nek1(-0.01), Lig4(-0.03), Prkdc(-0.04), Mta1(-0.06), Mta1(-0.06), Topbp1(-0.07), Rad51d(-0.08), Brcc3(-0.08), Rad51c(-0.09), Nhej1(-0.12), Nhej1(-0.12), Xrcc4(-0.12), Atm(-0.13),…
chromosome, centromeric region	0.0325681	0.119077	0.000135274	0.00134061	119	0.0114371	0.0568998	0.0130565	0.1822	0.123982	Sycp1(1.01), Bub1b(0.69), Sycp3(0.52), Rassf2(0.47), Cenpa(0.38), Cenpa(0.38), Birc5(0.33), Dnmt3a(0.29), Cenpl(0.29), Ndel1(0.29), Ss18l1(0.28), Spag5(0.26), Kansl1(0.26), Wdhd1(0.26), Clasp2(0.25), Tnks(0.23), Tpr(0.22), Cenpc1(0.21), Dnmt3b(0.21), Smc3(0.18), Phf2(0.17), Trp53bp1(0.17), Cenpq(0.17), Zfp276(0.16), Mis12(0.16), Smc1a(0.15), Ahctf1(0.15), Dsn1(0.14), Clasp1(0.14), Ppp2cb(0.11), Z…
regulation of translational initiation	0.0353821	0.266737	0.000137492	0.00135879	22	0.257989	0.0398534	0.0120195	0.0537519	0.0309939	Eif2ak4(0.17), Ppp1r15b(0.16), Impact(0.07), Eif5b(0.07), Eif4g1(0.03), Ctif(0.03), Eif4ebp2(-0.04), Ncbp2(-0.05), Eif4g2(-0.06), Eif4g2(-0.06), Mknk1(-0.07), Eif5(-0.08), Gle1(-0.1), Ncbp1(-0.1), Eif4a1(-0.11), Eif4a2(-0.12), Klhl25(-0.13), Eif3b(-0.17), Eif2b2(-0.19), Eif3k(-0.2), Eif2b1(-0.3), Eif4ebp1(-0.38),
DNA clamp loader activity	0.0443229	0.368725	0.000140013	0.00137602	11	0.0508452	0.0277115	0.0432687	0.0698573	0.0836682	Rfc1(0.01), Rfc3(-0.03), Rfc3(-0.03), Rad17(-0.05), Rfc2(-0.08), Rfc2(-0.08), Rfc5(-0.1), Rfc5(-0.1), Rfc4(-0.31), Rfc4(-0.31), Chtf18(-0.53),
response to stilbenoid	0.0255876	0.377918	0.000140666	0.00137861	15	0.40198	0.0198171	0.193968	0.0178749	0.00217022	Saa3(0.5), Idi1(0.22), Cidea(0.11), Hba-a1(0.11), Slco1a1(0.03), Slc22a7(-0.08), Cyp2a4(-0.11), Ly6d(-0.13), Usp18(-0.24), Apoa4(-0.26), Cyp2a5(-0.3), Gsta2(-0.36), Cd36(-0.41), Gsta1(-0.72), Ifit3(-0.84),
peroxisomal matrix	0.0158559	0.355962	0.000143285	0.0014004	16	0.37018	0.380591	0.045359	0.000121554	0.0172489	Acox3(0.19), Mvd(0.17), Scp2(0.04), Lonp2(-0.05), Lonp2(-0.05), Pex7(-0.1), Abcd3(-0.11), Hspd1(-0.14), Prdx5(-0.18), Gnpat(-0.21), Ide(-0.23), Ide(-0.23), Acot8(-0.24), Mlycd(-0.3), Prdx1(-0.35), Paox(-0.37),
nucleoside diphosphate phosphorylation	0.0396911	0.352982	0.000151837	0.00147988	12	0.0115573	0.0323887	0.135862	0.050415	0.111472	Ak4(0.32), Ak5(0.31), Ak7(-0.06), Cmpk1(-0.13), Nme7(-0.18), Nme5(-0.22), Ak1(-0.23), Nme1(-0.34), Nme4(-0.39), Cmpk2(-0.4), Nme6(-0.4), Nme2(-0.41),
Ran GTPase binding	0.0345925	0.225994	0.000154846	0.00150507	30	0.211595	0.0483495	0.0126455	0.0662315	0.0312831	Birc5(0.33), Ranbp2(0.23), Ranbp10(0.17), Tnpo1(0.13), Ranbp3l(0.11), Ranbp9(0.09), Xpo6(0.07), Nup153(0.04), Nup50(0.02), Ipo11(0.01), Ipo8(-0.03), Ipo9(-0.04), Xpo7(-0.06), Nxt1(-0.07), Nutf2(-0.07), Tnpo2(-0.09), Kpnb1(-0.12), Xpo4(-0.12), Ranbp3(-0.12), Ipo7(-0.14), Ipo13(-0.15), Xpo5(-0.17), Cse1l(-0.19), Xpo1(-0.2), Rangap1(-0.21), Ipo5(-0.21), Ranbp17(-0.23), Xpot(-0.41), Ranbp1(-0.44), Ip…
nucleoside triphosphate biosynthetic process	0.0425399	0.367553	0.000159511	0.00154616	11	0.0415542	0.0351222	0.153827	0.0656904	0.0240615	Ak4(0.32), Ak5(0.31), Ak7(-0.06), Cmpk1(-0.13), Suclg1(-0.19), Ak1(-0.23), Nme1(-0.34), Nme4(-0.39), Cmpk2(-0.4), Nme2(-0.41), Nme2(-0.41),
negative regulation of release of cytochrome c from mitochondria	0.0418687	0.298679	0.000161199	0.00155826	17	0.0401952	0.020574	0.0435607	0.116239	0.0889889	Hgf(0.46), Arrb2(0.19), Igf1(0.12), Nol3(-0.01), Park2(-0.02), Lmna(-0.04), Opa1(-0.07), Opa1(-0.07), Akt1(-0.13), Higd1a(-0.14), Prelid1(-0.16), Gpx1(-0.21), Psmd10(-0.21), Fxn(-0.22), Parl(-0.23), Triap1(-0.29), Ppif(-0.52),
dITP diphosphatase activity	0.0425034	0.325241	0.000167056	0.00161048	14	0.0984026	0.167133	0.014643	0.117205	0.00827605	Entpd7(0.29), Rhobtb3(0.16), Nudt19(-0.04), Itpa(-0.12), Itpa(-0.12), Nudt4(-0.13), Nudt16(-0.13), Dxo(-0.13), Nudt17(-0.17), Lsg1(-0.27), Nudt7(-0.3), Nudt6(-0.36), Entpd2(-0.39), Nudt8(-0.43),
helicase activity	0.0251848	0.120282	0.000169328	0.00162794	116	0.0846672	0.0401876	0.0340362	0.0181143	0.165565	Chd5(1.05), Chd7(0.59), Chd2(0.39), Smarca2(0.37), Ddx6(0.34), Setx(0.34), Anxa1(0.33), Smarca1(0.33), Helz2(0.33), Chd6(0.32), Atrx(0.29), Ddx3x(0.26), Ddx5(0.26), Rad54l2(0.24), Chd1(0.23), Snrnp200(0.23), Chd4(0.21), Helz(0.2), Ep400(0.19), Ddx3y(0.18), Chd9(0.16), Dicer1(0.16), Chd8(0.14), Blm(0.12), Ddx42(0.1), Smarca5(0.1), Dhx57(0.1), Brip1(0.1), Ddx17(0.09), Dhx36(0.09), Dhx9(0.08), Mov10…
mRNA cleavage and polyadenylation specificity factor complex	0.0452268	0.279381	0.000170612	0.00163584	19	0.262878	0.0755509	0.0161434	0.0207594	0.0392154	Zc3h3(0.24), Cpsf4l(0.2), Wdr33(0.11), Pip5k1a(0.1), Csnk1a1(0.03), Cpsf1(-0.02), Cpsf1(-0.02), Fip1l1(-0.03), Tut1(-0.04), Cstf2t(-0.05), Cpsf4(-0.08), Cpsf4(-0.08), Cpsf2(-0.09), Cpsf2(-0.09), Ssu72(-0.22), Cstf2(-0.23), Cstf2(-0.23), Cpsf3(-0.35), Cpsf3(-0.35),
TBP-class protein binding	0.0473111	0.245343	0.000176584	0.00168852	26	0.11797	0.0188085	0.0343308	0.0767219	0.0698723	Cand2(0.31), Cand2(0.31), Ercc1(0.29), Taf1(0.22), Taf1(0.22), Brf1(0.15), Gtf2a1(0.14), Gtf2a2(-0.05), Gtf2a2(-0.05), Cand1(-0.07), Gtf2b(-0.08), Thra(-0.1), Hnrnpf(-0.11), Psmc1(-0.12), Psmc1(-0.12), Dr1(-0.14), Yeats2(-0.15), Psmc2(-0.16), Psmc2(-0.16), Psmc5(-0.16), Psmc5(-0.16), Rnf4(-0.16), Psmc6(-0.16), Psmc3(-0.17), Psmc4(-0.17), Naca(-0.28),
3-hydroxyacyl-CoA dehydrogenase activity	0.0287725	0.418337	0.000177762	0.00169521	10	0.427111	0.251521	0.0190927	0.00861659	0.00371247	H2-Ke6(0.27), Ehhadh(-0.07), Ehhadh(-0.07), Hadha(-0.1), Cryl1(-0.12), Hadhb(-0.15), Hadh(-0.24), Hadh(-0.24), Hsd17b4(-0.25), Hsd17b10(-0.28),
potassium ion transmembrane transport	0.0303328	0.197741	0.000188611	0.00179383	53	0.0058346	0.396857	0.0762842	0.0739502	0.0110277	Kcnc2(0.86), P2ry12(0.74), Slc9a3(0.73), Kcnt1(0.65), Kcne4(0.47), Kcna5(0.4), Slc9a7(0.37), Kcnh2(0.35), Kcnh2(0.35), Kcnip4(0.3), Kcns3(0.3), Slc9a9(0.3), Kcnj2(0.28), Kcnd3(0.27), Slc9a4(0.26), Kcnk6(0.22), Kcnk3(0.2), Kcnq1(0.14), Slc9a1(0.09), Kcnb1(0.06), Kcnb1(0.06), Kcnb1(0.06), Kcnf1(0.04), Tmem38a(0.02), Kcnd1(0.01), Kcnh7(0), Slc9a8(-0.01), Slc9a6(-0.07), Tmem38b(-0.08), Slc9a5(-0.08),…
intrinsic apoptotic signaling pathway by p53 class mediator	0.0488143	0.216558	0.000195826	0.00185746	31	0.183044	0.0173148	0.0991653	0.0408398	0.0297506	Pmaip1(0.76), Zmat1(0.53), Zfp385b(0.33), Zfp385b(0.33), Pml(0.32), Trp53bp2(0.29), Ddx5(0.26), Ppp1r13b(0.25), Jmy(0.06), Stk11(0.02), Zfp346(0.01), Bok(-0.01), Pdk2(-0.03), Shisa5(-0.1), Perp(-0.13), Fhit(-0.16), Eda2r(-0.16), Pycard(-0.18), Bbc3(-0.2), Zfp385a(-0.21), Hint1(-0.27), Zmat3(-0.3), Wwox(-0.3), Rrp8(-0.3), Bax(-0.34), E2f1(-0.36), E2f2(-0.41), Trp53(-0.49), Trp53(-0.49), Trp53(-0.4…
protein export from nucleus	0.0482339	0.22793	0.000206171	0.00195036	30	0.0491749	0.031587	0.108753	0.0625031	0.0526413	Egr2(0.36), Tgfb1(0.28), Cchcr1(0.28), Smurf1(0.27), Pkd1(0.25), Gsk3b(0.22), Xpo6(0.07), Nup214(0.03), Nup88(0.01), Chp1(-0.04), Stradb(-0.05), Xpo7(-0.06), Xpo7(-0.06), Nxt1(-0.07), Nutf2(-0.07), Ahcyl1(-0.09), Calr(-0.1), Xpo4(-0.12), Hspa9(-0.13), Xpo5(-0.17), Xpo5(-0.17), Strada(-0.19), Cse1l(-0.19), Xpo1(-0.2), Xpo1(-0.2), Xpo1(-0.2), Ranbp17(-0.23), Nupl2(-0.3), Eif5a(-0.43), Ran(-0.46),
FK506 binding	0.0323932	0.287878	0.000227849	0.00214968	19	0.00857381	0.0293218	0.101047	0.126498	0.125999	Ttc9(0.58), Fkbp5(0.15), Fkbp10(0.15), Fkbp14(0.13), Fkbp7(0.07), Fkbp1b(0.05), Fkbp1b(0.05), Fkbpl(-0.04), Ppid(-0.08), Ttc9c(-0.1), Fkbp2(-0.15), Fkbp8(-0.19), Fkbp9(-0.19), Fkbp1a(-0.22), Fkbp1a(-0.22), Fkbp1a(-0.22), Fkbp3(-0.27), Fkbp4(-0.29), Fkbp11(-0.53),
DNA-dependent DNA replication	0.0475588	0.299962	0.00023362	0.00219411	16	0.0314806	0.0346253	0.0462992	0.0811451	0.142715	Baz1a(0.19), Pold3(0.06), Orc6(-0.02), Rpain(-0.02), Mcmbp(-0.02), Mcmbp(-0.02), Rfc3(-0.03), Pole2(-0.06), Helb(-0.07), Rfc2(-0.08), Rfc5(-0.1), Pold1(-0.27), Rfc4(-0.31), Pold2(-0.49), Pold4(-0.52), Pold4(-0.52),
kinetochore	0.0434922	0.114696	0.000233798	0.00219411	114	0.0508498	0.029356	0.00603559	0.236106	0.142919	Bub1b(0.69), Bub1b(0.69), Bub1b(0.69), Rassf2(0.47), Cenpa(0.38), Apc(0.35), Birc5(0.33), Ppp1r12a(0.29), Ndel1(0.29), Ndel1(0.29), Ss18l1(0.28), Spag5(0.26), Spag5(0.26), Spag5(0.26), Kansl1(0.26), Clasp2(0.25), Nup98(0.24), Tpr(0.22), Cenpc1(0.21), Pafah1b1(0.17), Pafah1b1(0.17), Phf2(0.17), Trp53bp1(0.17), Zfp276(0.16), Pbrm1(0.16), Mis12(0.16), Smc1a(0.15), Ahctf1(0.15), Dsn1(0.14), Clasp1(0.…
DNA-directed DNA polymerase activity	0.0484652	0.222527	0.000240255	0.00224873	29	0.0460703	0.00931296	0.0437031	0.133087	0.171391	Polg2(0.26), Polg2(0.26), Pola2(0.24), Rev3l(0.19), Polm(0.19), Papd7(0.09), Pold3(0.06), Primpol(0.04), Polg(0.03), Polg(0.03), Pola1(0), Pola1(0), Pole2(-0.06), Polh(-0.08), Pole(-0.09), Polk(-0.1), Papd5(-0.11), Pole4(-0.14), Polb(-0.19), Polb(-0.19), Pole3(-0.24), Pold1(-0.27), Poli(-0.29), Chrac1(-0.33), Poll(-0.42), Poll(-0.42), Pold2(-0.49), Pold4(-0.52), Mybbp1a(-0.54),
ribosomal small subunit binding	0.0513392	0.319145	0.00024414	0.00227907	14	0.199755	0.0148794	0.0453745	0.0431818	0.0845255	Pim1(0.63), Cpeb2(0.31), Ddx3x(0.26), Eif4h(-0.05), Dhx29(-0.06), Eif4b(-0.13), Eral1(-0.19), Eral1(-0.19), Ptcd3(-0.29), Abce1(-0.33), Nme1(-0.34), Mtif3(-0.35), Mtif3(-0.35), Npm1(-0.47),
GDP binding	0.0347282	0.181684	0.000252313	0.00234916	57	0.0247448	0.0480974	0.0104863	0.126324	0.242797	Iigp1(0.76), Rab27b(0.51), Gem(0.37), Rab3b(0.31), Rab8b(0.29), Sept5(0.28), Rap2b(0.2), Rab31(0.18), Srp54b(0.14), Kras(0.13), Gnai3(0.11), Rab21(0.09), Rab11b(0.08), Rab22a(0.07), Rab5b(0.07), Rab5a(0.07), Rab27a(0.06), Pck1(0.05), Rab35(0.04), Rab4a(0.03), Rab2a(0.03), Rragc(0.01), Rab18(-0.01), Rala(-0.01), Rab28(-0.01), Rab10(-0.02), Rab40c(-0.02), Rab12(-0.03), Arf1(-0.04), Rhob(-0.04), Rho…
snRNA processing	0.0418908	0.325088	0.000256237	0.00237944	14	0.137553	0.170017	0.00560386	0.0619562	0.0496508	Ints6(0.11), Ints12(0.06), Ints8(0.01), Ints1(-0.04), Tut1(-0.04), Ints7(-0.08), Ints5(-0.08), Ints2(-0.09), Ints9(-0.1), Ints4(-0.12), Ints4(-0.12), Cpsf3l(-0.24), Ints3(-0.25), Ints10(-0.35),
unfolded protein binding	0.0177	0.165387	0.000266962	0.00247255	70	0.80219	0.0297842	0.109453	0.000651499	0.0117707	Hspa1a(1.41), Cct6b(0.64), Dnajb1(0.56), Dnajb4(0.47), Hspa1l(0.44), Dnaja1(0.44), Dnajb5(0.4), Uggt2(0.33), Scg5(0.3), Hspa2(0.29), Hspa8(0.24), Hspa8(0.24), Hsp90aa1(0.24), Tmem67(0.23), Dnajb2(0.19), Dnajb13(0.18), Hspa5(0.17), Dnaja4(0.17), Tbce(0.13), Hsp90ab1(0.05), Grpel2(0.05), Hsp90b1(0.05), Dnajb6(0.05), Ube4b(0.04), Cdc37l1(0.03), Serpinh1(0.02), Syvn1(0.02), Syvn1(0.02), Pfdn1(0.01), …
mediator complex	0.0492679	0.178675	0.000275489	0.00254486	52	0.0752028	0.142393	0.010939	0.0376767	0.125826	Med13(0.53), Med13(0.53), Gli3(0.43), Med13l(0.36), Med12(0.23), Med12(0.23), Med12l(0.18), Med20(0.15), Med14(0.1), Med14(0.1), Med23(0.09), Med15(0.09), Thrap3(0.08), Thrap3(0.08), Med26(0.07), Med26(0.07), Med1(0.05), Med1(0.05), Med16(0.04), Med16(0.04), Med22(0), Med22(0), Med18(-0.01), Med18(-0.01), Med27(-0.01), Med31(-0.02), Med7(-0.03), Med17(-0.04), Med17(-0.04), Med17(-0.04), Med19(-0.…
protein N-linked glycosylation	0.0466391	0.20748	0.000289635	0.00266856	33	0.104875	0.0929011	0.0108494	0.0959208	0.0646937	Mgat5(0.33), Mgat5(0.33), Serpina1b(0.23), Mgat4a(0.23), B4galt1(0.18), Fut9(0.11), Dpm1(0.1), Tmem165(0.06), Serpina1a(0.01), Dolpp1(0), Fut4(-0.01), Ccdc126(-0.03), Fut11(-0.06), Alg12(-0.07), Alg12(-0.07), Rpn2(-0.08), Pmm2(-0.08), Fut10(-0.09), Mgat2(-0.09), Pgm3(-0.1), B4galt7(-0.14), Ddost(-0.2), Alg5(-0.23), Alg6(-0.23), Alg6(-0.23), Entpd5(-0.24), Gorasp1(-0.25), Dpagt1(-0.27), Dpagt1(-0.…
glutathione binding	0.045268	0.329535	0.000314487	0.00289002	13	0.0942283	0.190813	0.0842187	0.00194565	0.116919	Ptges(0.21), Gstm2(0.18), Ltc4s(-0.05), Gsta4(-0.08), Gsr(-0.11), Mgst1(-0.12), Gstm7(-0.12), Gss(-0.21), Lancl1(-0.22), Gstm4(-0.33), Gstm5(-0.43), Gstp1(-0.65), Gstp2(-0.66),
mitotic G1 DNA damage checkpoint	0.0495668	0.374808	0.000319326	0.00292688	10	0.0580752	0.0266301	0.0573408	0.325294	0.0178208	Trp63(0.27), Rfwd3(0.07), Gigyf2(-0.01), Ccnd1(-0.05), Rpa2(-0.14), Fbxo31(-0.2), Rps27l(-0.38), Bcat1(-0.39), Trp53(-0.49), Trp53(-0.49),
glutamine metabolic process	0.057069	0.277941	0.000321725	0.00293957	18	0.0710104	0.0831871	0.0660769	0.0232543	0.0998947	Gfpt2(0.47), Mecp2(0.24), Ggh(0.06), Gls(0.05), Nit2(0.05), Gfpt1(0.02), Gmps(-0.04), Aldh5a1(-0.07), Ctps2(-0.08), Glud1(-0.2), Pfas(-0.2), Pfas(-0.2), Ctps(-0.34), Sirt4(-0.34), Asnsd1(-0.35), Cad(-0.54), Asns(-0.6), Phgdh(-0.68),
superoxide dismutase activity	0.0299869	0.45993	0.000322372	0.00293957	11	0.463117	0.333152	0.0607421	0.00080791	0.00810453	Sod2(0.02), Sod2(0.02), Sod2(0.02), Ccs(0), Sod1(-0.1), Sod1(-0.1), Sod1(-0.1), Sod1(-0.1), Sod3(-0.18), Sod3(-0.18), Nqo1(-0.4),
integral component of endoplasmic reticulum membrane	0.0568608	0.127918	0.000328231	0.0029853	86	0.173881	0.0408094	0.0346566	0.0488661	0.0713272	Dhrs9(1.07), Sgms2(0.67), Slc37a1(0.63), G6pc(0.58), Derl3(0.38), Rtn4(0.25), Rtn4(0.25), Rrbp1(0.24), Edem1(0.2), Stim1(0.19), March6(0.19), Porcn(0.18), Ern1(0.18), Hspa5(0.17), Scd1(0.17), Slc37a2(0.16), Samd8(0.16), Samd8(0.16), Esyt1(0.12), Slc37a4(0.1), Dcstamp(0.1), Ext1(0.08), Cln3(0.07), Elovl6(0.07), Slc27a2(0.06), Acer3(0.06), Ankle2(0.05), Sgms1(0.05), Vimp(0.04), Slc35b1(0.04), Atf6(…
anterograde synaptic vesicle transport	0.0478385	0.310758	0.000336289	0.00305075	15	0.380114	0.0175551	0.0237061	0.0882524	0.031632	Ap3b2(0.28), Ap3d1(0.1), Ap3b1(0.03), Ap3m1(-0.04), Ap3m2(-0.05), Bloc1s4(-0.11), Bloc1s6(-0.12), Snapin(-0.17), Dtnbp1(-0.18), Ap3s1(-0.19), Bloc1s3(-0.2), Bloc1s1(-0.22), Ap3s2(-0.23), Bloc1s2(-0.24), Bloc1s5(-0.3),
cilium assembly	0.0176774	0.136693	0.000352273	0.00318758	138	0.000383901	0.118961	0.096065	0.15184	0.242546	Ccno(0.69), Foxj1(0.67), Celsr3(0.66), Lama5(0.42), Flna(0.42), Pcnt(0.41), Iqcb1(0.37), Ttbk2(0.33), Ttbk2(0.33), Fnbp1l(0.29), Ablim1(0.29), Trim59(0.25), Ahi1(0.23), Tmem67(0.23), Tmem67(0.23), 2410089E03Rik(0.22), 2410089E03Rik(0.22), Dync2h1(0.22), Cep290(0.2), Stk36(0.19), Ocrl(0.18), Cfap54(0.18), Arl13b(0.17), Cdc14a(0.17), Cep162(0.16), Ick(0.15), Ick(0.15), Cep295(0.13), Ablim3(0.13), B…
coenzyme A biosynthetic process	0.0339394	0.350218	0.000353224	0.00318802	13	0.0809057	0.235394	0.012117	0.0258197	0.104925	Pank2(0.03), Pank3(0.03), Pank1(-0.03), Pank1(-0.03), Pank1(-0.03), Pank4(-0.12), Ppcdc(-0.15), Acot7(-0.19), Coasy(-0.24), Coasy(-0.24), Coasy(-0.24), Dcakd(-0.35), Ppcs(-0.5),
hydrolase activity, acting on glycosyl bonds	0.0211495	0.171146	0.000363906	0.00327608	61	0.195103	0.213817	0.0434984	0.00310508	0.072836	Chil3(0.59), Cd38(0.52), Neu2(0.46), Amy1(0.44), Mgea5(0.41), Neu3(0.35), Cemip(0.35), Kl(0.27), Man2a1(0.22), Man2a2(0.21), Gba2(0.13), Hexdc(0.13), Hyal1(0.12), Tdg(0.07), Hyal3(0.07), Ganc(0.05), Pgghg(0.05), Gla(0.04), Man2c1(0.04), Neu1(0.03), Mutyh(0), Man1a2(-0.01), Glb1l(-0.01), Man1b1(-0.02), Gba(-0.03), Manea(-0.05), Naga(-0.06), Man1a(-0.08), Ganab(-0.09), Lyz2(-0.11), Man2b1(-0.11), M…
late endosome	0.0392535	0.136503	0.000366704	0.00329289	121	0.119488	0.0978647	0.0439826	0.0650022	0.0315121	Cxcr4(0.86), Gja1(0.63), Trf(0.61), Dysf(0.45), Nmnat2(0.44), Rapgef2(0.36), Slc11a1(0.31), Slc11a1(0.31), Micall1(0.3), Ddit3(0.27), Src(0.26), Hspa8(0.24), Abca5(0.21), Osbpl1a(0.18), Snx16(0.18), Snx16(0.18), Rab31(0.18), Atp7a(0.17), F2r(0.17), Bace1(0.17), Htt(0.15), Igf2r(0.15), Kcnq1(0.14), Nbr1(0.14), Zc3hav1(0.13), Apoe(0.11), Slc38a9(0.11), Fyco1(0.09), Myo5a(0.09), Map2k1(0.09), Parm1(…
telomerase holoenzyme complex	0.0434131	0.263654	0.000398573	0.00357	20	0.124965	0.0165123	0.0844283	0.0564474	0.104598	Hmbox1(0.21), Smg7(0.16), Hnrnpu(0.14), Smg6(0.12), Tep1(0.02), Tep1(0.02), Gnl3l(0.02), Smg5(-0.06), Hnrnpc(-0.1), Wrap53(-0.1), Tert(-0.11), Nvl(-0.11), Lsm11(-0.14), Snrpb(-0.17), Nat10(-0.18), Ptges3(-0.22), Snrpd3(-0.23), Nop10(-0.48), Dkc1(-0.64), Nhp2(-0.79),
integrator complex	0.0526031	0.315751	0.000401106	0.00358362	14	0.120559	0.145076	0.0115117	0.0619562	0.0730042	Ints6(0.11), Ints12(0.06), Ints8(0.01), Shfm1(-0.02), Ints1(-0.04), Ints7(-0.08), Ints5(-0.08), Ints2(-0.09), Ints9(-0.1), Ints4(-0.12), Ints4(-0.12), Cpsf3l(-0.24), Ints3(-0.25), Ints10(-0.35),
flavonoid biosynthetic process	0.0203099	0.450332	0.000410446	0.00365783	10	0.305903	0.274051	0.0120952	0.00311148	0.0833146	Ugt2b34(0.03), Ugt1a6a(-0.12), Ugt1a2(-0.23), Ugt3a2(-0.23), Ugt3a1(-0.24), Ugt2b38(-0.27), Ugt1a1(-0.35), Ugt8a(-0.36), Ugt1a10(-0.56), Ugt2b37(-0.69),
mitochondrial respiratory chain complex III assembly	0.0434071	0.376829	0.000411787	0.00366056	10	0.294253	0.0883911	0.0299561	0.0470356	0.0210965	Ttc19(0.08), Ttc19(0.08), Slc25a33(-0.02), Uqcrb(-0.04), Uqcr10(-0.19), Uqcc2(-0.21), Uqcc3(-0.25), Uqcc1(-0.3), Bcs1l(-0.47), Bcs1l(-0.47),
tRNA wobble uridine modification	0.0485399	0.359887	0.000422306	0.00374465	11	0.0660938	0.116702	0.023378	0.0321727	0.17671	Alkbh8(0.04), Alkbh8(0.04), Urm1(-0.02), Mto1(-0.04), 6430573F11Rik(-0.1), Gtpbp3(-0.11), Ctu2(-0.12), Ikbkap(-0.19), Mocs3(-0.26), Elp3(-0.35), Ctu1(-0.35),
bis(5'-nucleosyl)-tetraphosphatase activity	0.0546672	0.336735	0.00045574	0.00403102	12	0.0841402	0.222947	0.0205364	0.110259	0.0223228	Entpd7(0.29), Rhobtb3(0.16), Nudt19(-0.04), Nudt4(-0.13), Dxo(-0.13), Nudt17(-0.17), Lsg1(-0.27), Nudt7(-0.3), Nudt6(-0.36), Entpd2(-0.39), Nudt2(-0.4), Nudt8(-0.43),
nucleobase-containing compound metabolic process	0.047788	0.212223	0.000457505	0.00403654	31	0.0813365	0.174485	0.114943	0.0124098	0.0509245	Ak4(0.32), Ak5(0.31), Supt6(0.27), Pnp(0.15), Brip1(0.1), Tk2(0.02), Tpmt(0.01), Exosc10(0), Bpnt1(-0.03), Mettl14(-0.03), Ercc2(-0.04), Wrn(-0.04), Ak7(-0.06), Xrn2(-0.07), Mettl3(-0.07), Ak3(-0.09), Prnp(-0.1), Rtel1(-0.1), Dguok(-0.11), Exd2(-0.11), Cmpk1(-0.13), Ddx11(-0.18), Srbd1(-0.19), Ak1(-0.23), Ak2(-0.25), Dck(-0.32), Mettl4(-0.34), Nudt5(-0.36), Polr3h(-0.37), Rexo2(-0.37), Exd1(-0.37…
protein import into nucleus	0.0426892	0.180042	0.00046054	0.00405321	53	0.396461	0.0935256	0.0142592	0.0433697	0.0271398	Drd1(0.69), Cry2(0.44), Txnip(0.32), Phip(0.31), Hspa8(0.24), Nup98(0.24), Tpr(0.22), Stat3(0.21), Htt(0.15), Fgf9(0.12), Pom121(0.12), Kpna4(0.11), Nup93(0.08), Nup188(0.05), Nup153(0.04), Tsc2(0.03), Pttg1ip(0.03), Pttg1ip(0.03), Nup214(0.03), Nup50(0.02), Nup88(0.01), Ing1(0), Rpain(-0.02), Tnpo3(-0.02), Ipo8(-0.03), Kpna1(-0.04), Ipo9(-0.04), Cfl1(-0.06), Ppp3ca(-0.06), Nutf2(-0.07), Prickle1…
Cul4-RING E3 ubiquitin ligase complex	0.0529048	0.287099	0.000462038	0.0040563	18	0.21852	0.0921829	0.0297961	0.0605329	0.0308377	Dcaf10(0.15), Dcaf6(0.09), Dcaf7(0.06), Dcaf5(0.06), Dcaf8(0.05), Dcaf12(0.01), Rnf7(-0.06), Ddb2(-0.06), Dcaf11(-0.07), Ddb1(-0.1), Fbxw5(-0.1), Plrg1(-0.11), Dcaf17(-0.14), Cul4a(-0.14), Rbx1(-0.15), Dcaf13(-0.16), Dcaf13(-0.16), Dcaf4(-0.33),
positive regulation of T cell migration	0.0540754	0.307532	0.000467875	0.00409738	16	0.0167712	0.0265516	0.0938136	0.0726807	0.285642	Adam8(0.71), Itgb3(0.67), Ccl20(0.55), Cxcl10(0.39), Itga4(0.27), Tnfrsf14(0.18), Cxcl12(0.13), Selk(-0.04), Pycard(-0.18), Lgals9(-0.24), Ccl5(-0.34), Tmem102(-0.42), Tmem102(-0.42), Tmem102(-0.42), Ccl21a(-0.49), Aif1(-0.65),
lipid particle organization	0.0512663	0.292638	0.000484681	0.00423408	17	0.0890928	0.0626266	0.0510658	0.160767	0.0306017	Tbc1d20(0.05), Ptgfrn(0.04), Rab3gap1(0.03), Pnpla2(0.02), Spg20(0.01), Rab18(-0.01), Rab18(-0.01), Faf2(-0.04), Ppid(-0.08), Ddhd2(-0.13), Ppia(-0.15), Bscl2(-0.18), Fitm1(-0.32), Fitm2(-0.4), Fitm2(-0.4), Cidec(-0.45), Plin5(-0.55),
telomere maintenance	0.0372296	0.211707	0.00048817	0.00425405	39	0.0267312	0.10065	0.0609094	0.062119	0.140192	Hspa1a(1.41), Smg1(0.31), Xrn1(0.22), Dclre1c(0.19), Ccne1(0.17), Blm(0.12), Smg6(0.12), Ercc4(0.07), Tnks2(0.05), Upf1(0.04), Ccne2(0.02), Terf1(-0.01), Ctc1(-0.01), Rad50(-0.02), Terf2(-0.02), Terf2(-0.02), Pot1a(-0.03), Prkdc(-0.04), Wrn(-0.04), Wrn(-0.04), Wrn(-0.04), Terf2ip(-0.06), Nbn(-0.07), Obfc1(-0.07), Rad51d(-0.08), Rad51d(-0.08), Rpa1(-0.08), Rtel1(-0.1), Rtel1(-0.1), Atm(-0.13), Rpa…
protein homotetramerization	0.0302362	0.1579	0.000513774	0.00446617	65	0.543531	0.197546	0.0833591	0.0340507	0.000346314	Kcnj2(0.28), Crtc3(0.28), Trp63(0.27), Acacb(0.27), Tk1(0.24), Pfkp(0.23), Acaca(0.18), Golga2(0.16), Gbp5(0.16), Crtc2(0.15), Syt11(0.15), Evl(0.14), Fbp1(0.12), Vasp(0.12), Trpv6(0.1), Rxra(0.07), Gls(0.05), Gls(0.05), Samhd1(0.05), Gfpt1(0.02), Sod2(0.02), Dcxr(0.02), Dcxr(0.02), Dnm1l(0.01), Aldoc(-0.01), Usp16(-0.01), Acadl(-0.05), Aldh5a1(-0.07), Gpx3(-0.09), Crtc1(-0.11), Pfkm(-0.12), Pcbd…
hydrogen ion transmembrane transporter activity	0.0450223	0.255491	0.000518809	0.00449889	26	0.436216	0.139794	0.0672348	0.00410377	0.0254308	Slc36a1(0.23), Slc36a1(0.23), Atp6v0d2(0.14), Atp6v0a1(0.09), Slc11a2(0.03), Atp6v0c(0.02), Atp6v0a2(-0.01), Atp5j(-0.02), Atp6v1b1(-0.04), Atp6v0a4(-0.04), Atp6v0e2(-0.05), Atp6v1c2(-0.07), Atp5h(-0.08), Atp6v0d1(-0.11), Atp6v1c1(-0.11), Atp5g3(-0.11), Atp6v0e(-0.14), Atp5f1(-0.15), Atp5k(-0.15), Atp5d(-0.17), Atp6v0b(-0.17), Atp5l(-0.2), Slc46a1(-0.22), Atp5g1(-0.29), Atp5g2(-0.65), Slc36a2(-0.…
cytosolic ribosome	0.0425599	0.32193	0.000533163	0.00461205	14	0.253483	0.0315018	0.0967496	0.0979382	0.0138707	Apod(0.32), Eif2ak4(0.17), Rpl24(0.13), Ppargc1a(0.09), Repin1(-0.06), Rpl11(-0.09), Rpl5(-0.15), Mrpl4(-0.19), Rpl27a(-0.21), Nufip1(-0.24), Nufip1(-0.24), Rpl23(-0.24), Rpl29(-0.37), Naa10(-0.44),
telomerase activity	0.0586139	0.280277	0.000546565	0.00470498	17	0.0425262	0.0101051	0.130203	0.0772964	0.239412	Hmbox1(0.21), Rev1(0.07), Primpol(0.04), Tep1(0.02), Tep1(0.02), Terf1(-0.01), Terf2(-0.02), Ispd(-0.07), Tert(-0.11), Tert(-0.11), Prim2(-0.12), Ptges3(-0.22), Uap1l1(-0.22), Prim1(-0.31), Ctu1(-0.35), Nudt5(-0.36), Dkc1(-0.64),
chromosome, telomeric region	0.0559826	0.180744	0.000552469	0.00474426	47	0.0243479	0.032114	0.0995224	0.0805218	0.2156	Setx(0.34), Atrx(0.29), Tnks(0.23), Smc5(0.2), Rif1(0.18), Trp53bp1(0.17), Rnf8(0.13), Blm(0.12), Tinf2(0.12), Tinf2(0.12), Smg6(0.12), Dhx36(0.09), Ercc4(0.07), Tnks2(0.05), Ten1(0.04), Tep1(0.02), Cdk2(0), Smc6(0), Terf1(-0.01), Ctc1(-0.01), Rad50(-0.02), Terf2(-0.02), Pot1a(-0.03), Chek1(-0.05), Rad17(-0.05), Terf2ip(-0.06), Terf2ip(-0.06), Terf2ip(-0.06), Nbn(-0.07), Obfc1(-0.07), Mre11a(-0.0…
regulation of neuron apoptotic process	0.0665794	0.234375	0.000584383	0.00499648	24	0.115769	0.0704611	0.0530365	0.116696	0.037324	Esr1(0.37), Gabrb3(0.34), Trp63(0.27), Mef2c(0.26), Gata3(0.18), Pink1(0.06), Nsmf(0.04), Trim2(0.03), Trim2(0.03), Bdnf(-0.01), Ntf3(-0.02), Nae1(-0.05), Egln2(-0.08), Egln3(-0.19), Park7(-0.2), Gpx1(-0.21), G6pdx(-0.22), Bax(-0.34), Akt1s1(-0.4), Kcnip3(-0.44), Npm1(-0.47), Trp53(-0.49), Sigmar1(-0.55), Pcsk9(-0.81),
carboxypeptidase activity	0.035318	0.264636	0.000584664	0.00499648	23	0.135241	0.277523	0.042633	0.0112381	0.0589621	Cndp1(0.48), Cpm(0.27), Aebp1(0.17), Cpd(0.1), Folh1(0.02), Agbl5(0.01), Naalad2(-0.02), Prcp(-0.06), Agtpbp1(-0.07), Cndp2(-0.11), Cpn1(-0.11), Cpn1(-0.11), Ctsa(-0.12), Cpq(-0.12), Scpep1(-0.18), Agbl3(-0.18), Ace(-0.21), Ace2(-0.42), Ace2(-0.42), Cpe(-0.56), Cpe(-0.56), Cpb2(-1.56), Cpb2(-1.56),
phosphoric ester hydrolase activity	0.017913	0.194934	0.000598103	0.00509901	54	0.207762	0.18782	0.0159359	0.0282205	0.0680361	Zc3h12a(0.46), Endou(0.45), Zc3h12c(0.42), Ercc5(0.2), Dclre1c(0.19), Synj2(0.18), Cmbl(0.17), Pgap1(0.17), Fen1(0.16), Fbp1(0.12), Gdpd1(0.12), Smg6(0.12), Rbbp8(0.08), Ercc4(0.07), Gdpd5(0.07), Isg20l2(0.04), Rexo1(-0.01), Eri2(-0.01), Rida(-0.03), 4931406C07Rik(-0.03), Tsn(-0.04), Wrn(-0.04), Mpped2(-0.04), Mgme1(-0.07), Apex2(-0.07), Sacm1l(-0.08), Mppe1(-0.09), Iah1(-0.1), Fig4(-0.1), Bphl(-…
signal recognition particle, endoplasmic reticulum targeting	0.0629481	0.387916	0.000600615	0.00510812	10	0.144456	0.0222649	0.059854	0.0582605	0.147647	Srp54b(0.14), Srp9(0.04), Srp68(-0.03), Srp68(-0.03), Srp19(-0.09), Srp72(-0.11), Srp72(-0.11), Srp72(-0.11), Srp14(-0.15), Srp14(-0.15),
cellular respiration	0.0556726	0.282779	0.00060775	0.0051564	17	0.252464	0.0212325	0.0381577	0.101511	0.0677173	Nr4a3(0.99), Nfatc4(0.15), ND1(0.06), Nfatc3(0.06), Slc25a25(0.01), Ndufs1(-0.04), Slc25a13(-0.06), Ndufs4(-0.1), Fastkd3(-0.11), Fastkd3(-0.11), Ndufaf2(-0.24), Fastkd1(-0.24), Cox10(-0.27), Fastkd5(-0.3), Bax(-0.34), Fastkd2(-0.34), Tbrg4(-0.38),
Derlin-1 retrotranslocation complex	0.0546014	0.33915	0.000627791	0.00531285	15	0.320441	0.22195	0.00718993	0.0270608	0.0539342	Sel1l(0.06), Rnf185(0.06), Rnf185(0.06), Vimp(0.04), Syvn1(0.02), Syvn1(0.02), Amfr(-0.04), Rnf5(-0.04), Rnf5(-0.04), Vcp(-0.04), Vcp(-0.04), H13(-0.08), Rnf139(-0.1), Svip(-0.13), Derl1(-0.14),
XTP diphosphatase activity	0.0574289	0.332561	0.000629193	0.00531285	12	0.0841402	0.214865	0.013621	0.193528	0.0243278	Entpd7(0.29), Rhobtb3(0.16), Nudt19(-0.04), Itpa(-0.12), Nudt4(-0.13), Dxo(-0.13), Nudt17(-0.17), Lsg1(-0.27), Nudt7(-0.3), Nudt6(-0.36), Entpd2(-0.39), Nudt8(-0.43),
T/G mismatch-specific endonuclease activity	0.0212634	0.202213	0.000649018	0.00545422	48	0.17351	0.23097	0.0119887	0.0364074	0.0715158	Zc3h12a(0.46), Endou(0.45), Zc3h12c(0.42), Ercc5(0.2), Dclre1c(0.19), Cmbl(0.17), Pgap1(0.17), Fen1(0.16), Gdpd1(0.12), Smg6(0.12), Rbbp8(0.08), Ercc4(0.07), Gdpd5(0.07), Isg20l2(0.04), Rexo1(-0.01), Eri2(-0.01), Rida(-0.03), 4931406C07Rik(-0.03), Tsn(-0.04), Wrn(-0.04), Mpped2(-0.04), Mgme1(-0.07), Apex2(-0.07), Mppe1(-0.09), Iah1(-0.1), Bphl(-0.11), Dbr1(-0.11), Rexo4(-0.12), Enpp5(-0.13), Pelo…
retroviral 3' processing activity	0.0212634	0.202213	0.000649018	0.00545422	48	0.17351	0.23097	0.0119887	0.0364074	0.0715158	Zc3h12a(0.46), Endou(0.45), Zc3h12c(0.42), Ercc5(0.2), Dclre1c(0.19), Cmbl(0.17), Pgap1(0.17), Fen1(0.16), Gdpd1(0.12), Smg6(0.12), Rbbp8(0.08), Ercc4(0.07), Gdpd5(0.07), Isg20l2(0.04), Rexo1(-0.01), Eri2(-0.01), Rida(-0.03), 4931406C07Rik(-0.03), Tsn(-0.04), Wrn(-0.04), Mpped2(-0.04), Mgme1(-0.07), Apex2(-0.07), Mppe1(-0.09), Iah1(-0.1), Bphl(-0.11), Dbr1(-0.11), Rexo4(-0.12), Enpp5(-0.13), Pelo…
misfolded or incompletely synthesized protein catabolic process	0.0492609	0.349359	0.000652454	0.0054701	12	0.335617	0.104959	0.0182708	0.0298987	0.062104	Hdac6(0.02), Ube2w(0.01), Atxn3(0.01), Ngly1(-0.01), Lonp2(-0.05), Yme1l1(-0.08), Yme1l1(-0.08), Stub1(-0.12), Stub1(-0.12), Lonp1(-0.16), Oma1(-0.21), Clpp(-0.37),
structural constituent of nuclear pore	0.0450171	0.276625	0.00066778	0.00558536	21	0.250781	0.0341193	0.041178	0.073561	0.067928	Nup98(0.24), Nup98(0.24), Pom121(0.12), Pom121(0.12), Nup93(0.08), Nup93(0.08), Nup188(0.05), Nup153(0.04), Nup153(0.04), Nup214(0.03), Nup54(0.02), Nup107(-0.09), Nup107(-0.09), Nup205(-0.13), Nup205(-0.13), Nup155(-0.13), Nup133(-0.15), Tmem33(-0.18), Nup85(-0.19), Ndc1(-0.33), Ndc1(-0.33),
mitochondrion morphogenesis	0.0671289	0.248808	0.000720547	0.00601249	21	0.0735459	0.111028	0.0385569	0.0946987	0.0847583	Polg2(0.26), Col4a3bp(0.18), Myh14(0.11), Pid1(0.11), Bcl2l1(0.06), Pank2(0.03), Dnm1l(0.01), Coq7(-0.05), Mtm1(-0.05), Mtm1(-0.05), Ndufs6(-0.09), Mff(-0.1), Fis1(-0.14), Pnpt1(-0.17), Slirp(-0.19), Opa3(-0.19), Ssbp1(-0.21), Nubpl(-0.24), Poldip2(-0.28), Supv3l1(-0.29), Bax(-0.34),
mRNA transport	0.050816	0.145706	0.000734998	0.00611864	79	0.198748	0.126064	0.0132287	0.0443511	0.115283	Zc3h11a(0.38), Zfp36(0.37), Qk(0.36), Zfp36l1(0.32), Supt6(0.27), Hnrnpa3(0.27), Zc3h3(0.24), Nup98(0.24), Ranbp2(0.23), Tnks(0.23), Iws1(0.22), Tpr(0.22), Slbp(0.21), Casc3(0.18), Thoc2(0.16), Htt(0.15), Ahctf1(0.15), Nup160(0.13), Ncbp3(0.13), Kif5c(0.12), Pom121(0.12), Myo1c(0.11), Hnrnpa2b1(0.1), Srsf3(0.09), Nup93(0.08), Fmr1(0.07), Nup188(0.05), Poldip3(0.03), Nup214(0.03), Magohb(0.02), Nu…
endosome to melanosome transport	0.0566865	0.374639	0.000761967	0.00632826	10	0.262517	0.0784835	0.0149766	0.0415441	0.128433	Ap1g1(0.1), Ap3d1(0.1), Cd63(-0.12), Bloc1s6(-0.12), Ap1m1(-0.2), Bloc1s3(-0.2), Rab32(-0.24), Ankrd27(-0.27), Bloc1s5(-0.3), Rab38(-0.52),
retinol metabolic process	0.0550539	0.273637	0.000765576	0.00634334	21	0.0162676	0.413839	0.0265645	0.0670728	0.0971126	Rdh12(0.79), Rdh10(0.37), Cyp1b1(0.24), Cyp1b1(0.24), Adh1(0.19), Adh1(0.19), Dhrs3(0.04), Ttr(-0.01), Rbp1(-0.02), Rbp1(-0.02), Rbp1(-0.02), Rdh14(-0.08), Retsat(-0.16), Aldh1a1(-0.22), Rbp4(-0.37), Rbp4(-0.37), Lrat(-0.52), Lrat(-0.52), Lrat(-0.52), Adh7(-0.59), Adh7(-0.59),
antigen processing and presentation of exogenous peptide antigen via MHC class II	0.0223391	0.407669	0.000768472	0.00635062	14	0.00572956	0.122007	0.0240494	0.503615	0.0774869	Fcer1g(0.17), Fcgr2b(0.14), Traf6(0.11), Ctse(-0.04), Ctse(-0.04), H2-DMa(-0.08), H2-DMa(-0.08), Cd74(-0.09), H2-Aa(-0.12), H2-Eb1(-0.19), Unc93b1(-0.23), Ifi30(-0.26), H2-DMb1(-0.28), H2-Ab1(-0.33),
lysosome localization	0.0573013	0.283771	0.000770045	0.00635062	17	0.439151	0.121437	0.0614831	0.022315	0.0135474	Plekhm2(0.24), Borcs6(0.15), Map6(0.04), Map6(0.04), Hdac6(0.02), Vps33b(-0.08), Arl8b(-0.1), Kxd1(-0.12), Vps33a(-0.14), Rab34(-0.16), Snapin(-0.17), Lamtor1(-0.18), Tmem106b(-0.19), Tmem106b(-0.19), Bloc1s1(-0.22), Bloc1s2(-0.24), Borcs5(-0.3),
positive regulation of RNA polymerase II transcriptional preinitiation complex assembly	0.0666115	0.353838	0.000773162	0.00636151	11	0.143675	0.0300202	0.026734	0.125302	0.145805	Ahr(0.28), Creb1(0.19), Ikzf1(0.14), Cand1(-0.07), Psmc1(-0.12), Psmc2(-0.16), Psmc5(-0.16), Psmc6(-0.16), Psmc3(-0.17), Psmc4(-0.17), Gtf2f2(-0.22),
polyubiquitin binding	0.0524237	0.23134	0.000785616	0.00644898	27	0.368405	0.150916	0.012925	0.0315485	0.0533626	Optn(0.27), Tnip2(0.25), Rad18(0.17), Sprtn(0.14), Tnip1(0.06), Bag6(0.06), Agl(0.05), Agl(0.05), Hdac6(0.02), Zfand6(0.02), Ubqln1(-0.02), Dzip3(-0.02), Vcp(-0.04), Vcp(-0.04), Agap3(-0.06), Brcc3(-0.08), Eps15(-0.09), Fam175b(-0.14), Faap20(-0.16), Ubxn1(-0.18), Sharpin(-0.19), Bre(-0.19), Rad23b(-0.2), Ubqln4(-0.22), Psmd4(-0.24), Fam175a(-0.28), Rad23a(-0.3),
formation of translation preinitiation complex	0.069691	0.358286	0.000788937	0.00646125	10	0.0455739	0.102559	0.0207647	0.107302	0.203209	Denr(0.08), Eif2s3y(-0.03), Eif4h(-0.05), Eif5(-0.08), Mcts1(-0.1), Eif4b(-0.13), Eif2d(-0.26), Eif2d(-0.26), Rps2(-0.27), Eif2s3x(-0.31),
protein autoprocessing	0.0494884	0.366824	0.000800205	0.00653839	10	0.055937	0.0235149	0.0126022	0.331273	0.210081	Ctsl(0.13), Casp12(-0.03), Capn2(-0.04), Ctse(-0.04), Tmprss2(-0.04), Capn1(-0.21), Fxn(-0.22), Parp1(-0.34), Pcsk9(-0.81), Pcsk9(-0.81),
zinc II ion transport	0.0608661	0.236616	0.000839358	0.00684251	24	0.0706875	0.136562	0.0420509	0.0814913	0.0907136	Mt3(0.4), Slc39a8(0.35), Slc30a7(0.12), Ap3d1(0.1), Ap3b1(0.03), Slc39a14(0.03), Slc30a5(-0.01), Slc30a5(-0.01), Slc30a9(-0.02), Slc30a1(-0.04), Slc30a1(-0.04), Slc39a13(-0.04), Slc30a4(-0.07), Slc39a1(-0.07), Slc39a3(-0.07), Slc39a9(-0.1), Slc39a5(-0.11), Slc39a6(-0.14), Slc30a2(-0.14), Slc39a4(-0.16), Slc39a7(-0.17), Slc39a10(-0.24), Slc39a11(-0.29), Slc30a6(-0.29),
ubiquitin binding	0.048492	0.144173	0.000875316	0.00711923	75	0.449844	0.136863	0.025947	0.0182702	0.0407125	Cxcr4(0.86), Tnfaip3(0.54), Cry2(0.44), Smad3(0.4), Ubr5(0.28), Optn(0.27), Ubxn7(0.23), Usp13(0.22), Per2(0.21), Ubtd2(0.21), Uchl1(0.2), Uchl1(0.2), Trp53inp2(0.2), Bcl10(0.16), Nbr1(0.14), Nbr1(0.14), Sprtn(0.14), Rnf31(0.12), Ubap1(0.06), Ubap1(0.06), Rnf216(0.05), Nploc4(0.04), Nploc4(0.04), Hdac6(0.02), Tsg101(0.02), Rnf168(0.02), Ubxn2a(0.02), Cks2(0.01), Brap(0.01), D17Wsu92e(0.01), Terf1…
DNA replication-dependent nucleosome assembly	0.053895	0.365648	0.000897453	0.00728254	10	0.365507	0.0592513	0.0066631	0.101768	0.0917315	Chaf1b(0.07), Nasp(0.01), Rbbp4(-0.02), Hat1(-0.08), Asf1a(-0.11), Chaf1a(-0.17), Asf1b(-0.27), Hist1h4h(-0.39), Ipo4(-0.47), Hist1h4i(-0.68),
water transport	0.0160638	0.360594	0.000938345	0.0075941	25	0.0512006	0.0770741	0.725771	0.110698	0.000535808	Aqp9(0.35), Aqp9(0.35), Aqp11(0.33), Aqp3(0.16), Aqp3(0.16), Aqp3(0.16), Aqp3(0.16), Aqp1(0.08), Aqp1(0.08), Aqp1(0.08), Aqp1(0.08), Aqp4(0.08), Aqp4(0.08), Aqp4(0.08), Aqp6(0.08), Slc14a1(-0.03), Slc14a1(-0.03), Upk3a(-0.09), Aqp2(-0.16), Aqp2(-0.16), Cftr(-0.19), Aqp7(-0.32), Aqp7(-0.32), Aqp8(-0.65), Aqp8(-0.65),
postreplication repair	0.0574449	0.347139	0.00094014	0.0075941	11	0.0694951	0.0205623	0.0626283	0.195229	0.149831	Rad18(0.17), Ube2b(-0.01), Hltf(-0.04), Ube2n(-0.07), Ube2n(-0.07), Polh(-0.08), Ube2f(-0.09), Msh2(-0.14), Msh2(-0.14), Nsmce1(-0.19), Brca1(-0.77),
protein targeting to peroxisome	0.0616007	0.385001	0.000944896	0.00761513	10	0.38993	0.177226	0.0337719	0.0118237	0.0493505	Zfand6(0.02), Pex1(0), Pex5(-0.02), Lonp2(-0.05), Lonp2(-0.05), Pex7(-0.1), Pex6(-0.11), Pex19(-0.14), Pex16(-0.27), Pex12(-0.32),
triglyceride homeostasis	0.0533381	0.25197	0.000959171	0.00771261	24	0.143928	0.136755	0.247694	0.00657809	0.0527802	Med13(0.53), Rora(0.33), Rora(0.33), Gpihbp1(0.21), Gpihbp1(0.21), Lpl(0.2), Scarb1(0.17), Sesn2(0.05), Mia2(-0.07), Hnf4a(-0.1), Angptl4(-0.1), Nr1h4(-0.14), Angptl8(-0.14), Angptl8(-0.14), Angptl8(-0.14), Apoa4(-0.26), Angptl3(-0.26), Angptl3(-0.26), Nr1h3(-0.27), Nr1h3(-0.27), Slco1a6(-0.42), Apoa1(-0.5), Apoa1(-0.5), Apoc3(-0.59),
mitophagy	0.0456735	0.246277	0.000971205	0.00779166	32	0.469492	0.165054	0.0894865	0.0319202	0.00366254	Wipi1(0.35), Rb1cc1(0.2), Atg2a(0.15), Atg12(0.09), Map1lc3b(0.08), Atg9a(0.08), Pink1(0.06), Pink1(0.06), Gabarapl1(0.03), Atg2b(0.01), Usp30(0.01), Atg4d(0.01), Wipi2(0), Park2(-0.02), Fundc1(-0.05), Fundc1(-0.05), Fbxo7(-0.06), Gabarap(-0.07), Map1lc3a(-0.07), Map1lc3a(-0.07), Atg4a(-0.07), Atg3(-0.09), Wdr45(-0.1), Cisd2(-0.1), Capn10(-0.11), Atg4b(-0.12), Wdr45b(-0.12), Gabarapl2(-0.13), Fis…
3'-5'-exoribonuclease activity	0.0624957	0.262241	0.0010232	0.00819025	21	0.115853	0.106056	0.0359764	0.196747	0.0360682	Xrn1(0.22), Pan2(0.2), Isg20l2(0.04), Exosc10(0), Cnot8(0), Dis3l(-0.01), Dis3l(-0.01), Cnot7(-0.02), Toe1(-0.03), Usb1(-0.03), Usb1(-0.03), Exosc3(-0.04), Dis3l2(-0.04), Dis3l2(-0.04), Xrn2(-0.07), Isg20(-0.08), Dxo(-0.13), Pnpt1(-0.17), Dis3(-0.22), Dis3(-0.22), Rexo2(-0.37),
RNA secondary structure unwinding	0.0693951	0.189244	0.00109727	0.00874828	41	0.182829	0.0285224	0.0635775	0.071773	0.146319	Ddx6(0.34), Ago2(0.33), Ago4(0.31), Ddx3x(0.26), Ddx3x(0.26), Ddx5(0.26), Ago3(0.24), Ddx3y(0.18), Ddx19b(0.16), Ddx42(0.1), Ddx17(0.09), Dhx36(0.09), Ddx50(0.08), Ddx59(0.03), Ddx23(0), Ago1(-0.06), Ddx19a(-0.08), Ddx47(-0.08), Ddx52(-0.08), Ddx39(-0.09), Ddx46(-0.09), Ddx20(-0.1), Ddx1(-0.1), Eif4a1(-0.11), Ddx39b(-0.11), Ddx39b(-0.11), Eif4a2(-0.12), Ddx55(-0.12), Ddx10(-0.12), Ddx24(-0.14), E…
mitochondrial calcium ion transport	0.0637686	0.319267	0.00109786	0.00874828	14	0.250124	0.161209	0.0345958	0.0205899	0.0925446	Ccdc109b(0.2), Slc8b1(0.04), Slc8b1(0.04), Mcur1(0.02), Mcur1(0.02), Mcu(-0.02), Mcu(-0.02), Micu2(-0.04), Micu2(-0.04), Slc25a23(-0.07), Smdt1(-0.11), Micu1(-0.13), Vdac1(-0.16), Stoml2(-0.26),
DNA damage response, signal transduction by p53 class mediator resulting in transcription of p21 class mediator	0.0691842	0.3013	0.00110431	0.0087799	14	0.0327238	0.0249556	0.0856802	0.333359	0.107046	Hipk2(0.42), Trp63(0.27), Foxm1(0.25), Foxm1(0.25), Cdkn1a(0.15), Rps6ka6(0.03), Brca2(0.02), Kat5(0.02), Ing4(-0.05), Trp53(-0.49), Trp53(-0.49), Trp53(-0.49), Chek2(-0.51), Tfap4(-0.64),
oxidoreductase activity, acting on the aldehyde or oxo group of donors, NAD or NADP as acceptor	0.0162615	0.349944	0.00113482	0.00900226	19	0.719928	0.479198	0.0455872	1.08656e-05	0.0777398	Aldh1a3(0.73), Aldh4a1(0.2), Aldh1a2(0.14), Aldh1b1(0.11), Aldh1l1(0.07), Aldh8a1(-0.05), Aldh2(-0.06), Aldh6a1(-0.06), Aldh3a2(-0.07), Aldh5a1(-0.07), Aldh9a1(-0.08), Aldh7a1(-0.09), Aldh16a1(-0.18), Aldh1a1(-0.22), Aldh1l2(-0.32), Htatip2(-0.4), Aldh1a7(-0.45), Aldh3b1(-0.49), Aldh18a1(-0.61),
DNA replication initiation	0.0437876	0.266462	0.0011559	0.00914896	23	0.197233	0.0174684	0.105498	0.354888	0.0128887	Pola2(0.24), Cdc45(0.22), Ccne1(0.17), Cdc7(0.06), Mcm4(0.03), Ccne2(0.02), Orc4(0.02), Orc4(0.02), Pola1(0), Orc6(-0.02), Slf1(-0.04), Topbp1(-0.07), Mcm3(-0.08), Orc3(-0.1), Mcm10(-0.1), Gins4(-0.12), Mcm6(-0.13), Mcm5(-0.15), Cdc6(-0.17), Orc5(-0.24), Mcm2(-0.29), Mcm2(-0.29), Mcm7(-0.33),
mitochondrial envelope	0.0489815	0.266537	0.00116511	0.00920123	18	0.193892	0.042248	0.179135	0.259893	0.00394567	H2-Ke6(0.27), Cidea(0.11), Bcl2l1(0.06), Bik(0.01), Bnip3l(0.01), Sh3glb1(0.01), Adap2(-0.02), Cyp27a1(-0.08), Bnip3(-0.09), Atp5d(-0.17), Fkbp8(-0.19), Bbc3(-0.2), Sdhd(-0.21), Abcb6(-0.3), Pemt(-0.31), Tomm20(-0.31), Slc25a14(-0.36), Ucp1(-1.45),
potassium channel activity	0.0415155	0.222154	0.00121177	0.00954841	42	0.0165316	0.484041	0.221715	0.125698	0.00350169	Kcnc2(0.86), Kcnt1(0.65), Kcne4(0.47), Abcc9(0.42), Abcc9(0.42), Kcna5(0.4), Kcnh2(0.35), Pkd2(0.3), Kcnip4(0.3), Kcns3(0.3), Kcnt2(0.29), Kcnd3(0.27), Kcnk6(0.22), Kcnk3(0.2), Fxyd4(0.16), Kcnq1(0.14), Aqp1(0.08), Kcnb1(0.06), Kcnf1(0.04), Tmem38a(0.02), Kcnd1(0.01), Kcnh7(0), Kcnj15(-0.04), Kcnn4(-0.06), Tmem38b(-0.08), Kcnk1(-0.12), Kcnk1(-0.12), Kcnk2(-0.14), Kcnq4(-0.16), Kcnc3(-0.18), Kcnma…
drug transmembrane transporter activity	0.0425555	0.381146	0.00127078	0.00999118	12	0.392102	0.159897	0.0633671	0.00712638	0.0664749	Abcc1(0.24), Slc18a2(0.24), Abcc3(0.2), Slc22a18(-0.08), Slc47a1(-0.1), Slc47a1(-0.1), Abcg2(-0.12), Abcg2(-0.12), Slc17a3(-0.25), Abcc4(-0.31), Slc18a1(-0.35), Abcb1b(-0.38),
peptide antigen binding	0.0565831	0.243838	0.001301	0.0101415	25	0.0258651	0.252588	0.0998994	0.062492	0.095905	H2-Q10(0.95), H2-Q10(0.95), Maml1(0.2), H2-D1(0.01), H2-D1(0.01), Tap2(0.01), H2-Q4(-0.01), H2-Q4(-0.01), H2-K1(-0.02), H2-K1(-0.02), H2-Q2(-0.05), H2-Q2(-0.05), H2-Aa(-0.12), H2-M3(-0.15), H2-M3(-0.15), H2-Q8(-0.16), H2-T23(-0.17), H2-T23(-0.17), H2-T22(-0.2), H2-T24(-0.22), H2-Q7(-0.25), H2-Q7(-0.25), Dhcr24(-0.27), H2-Ab1(-0.33), Tap1(-0.33),
ERAD pathway	0.0657138	0.330127	0.00130152	0.0101415	14	0.285067	0.202128	0.0196693	0.0310376	0.0800505	Sel1l(0.06), Sel1l(0.06), Rnf185(0.06), Rnf185(0.06), Syvn1(0.02), Syvn1(0.02), Rnf5(-0.04), Trim25(-0.04), Vcp(-0.04), Rnf139(-0.1), Stub1(-0.12), Derl1(-0.14), Tmem129(-0.14), Rhbdd1(-0.25),
phospholipase A2 activity	0.0707071	0.342321	0.00130379	0.0101415	11	0.0836334	0.0771417	0.127237	0.219598	0.0220502	Lcat(0.51), Pla2g4a(0.27), Pla2g4a(0.27), Proca1(-0.05), Pla2g5(-0.08), Abhd3(-0.13), Pla2g16(-0.24), Pla2g16(-0.24), Pla2g12a(-0.3), Pla2g6(-0.34), Pla2g2e(-0.47),
calcium-dependent cysteine-type endopeptidase activity	0.0570138	0.281679	0.00130424	0.0101415	19	0.0808945	0.0328281	0.0510149	0.262712	0.110918	Capn5(0.26), Capn13(0.18), Capn15(0.09), Gca(0.06), Sri(0.05), Capn6(0.01), Capn7(-0.02), Capn2(-0.04), Capn2(-0.04), Capn2(-0.04), Capns1(-0.06), Capns1(-0.06), Pdcd6(-0.07), Capn10(-0.11), Capn10(-0.11), Pef1(-0.19), Capn1(-0.21), Capn1(-0.21), Capn1(-0.21),
chaperone-mediated protein complex assembly	0.0718555	0.350186	0.00135304	0.0104979	10	0.277038	0.0540935	0.129267	0.00922462	0.153339	Clu(0.29), Hsp90aa1(0.24), Pfdn6(-0.11), Pfdn6(-0.11), Hspa4(-0.11), Bbs12(-0.12), Lonp1(-0.16), Cct2(-0.27), Mkks(-0.3), Bbs10(-0.35),
sphingolipid biosynthetic process	0.0560244	0.251216	0.00142298	0.0110164	24	0.173045	0.0217386	0.027056	0.53995	0.0296956	B3gnt5(1.15), B4galt6(0.44), Cers4(0.4), Elovl6(0.07), Cers6(0.02), Cers5(0), Elovl5(-0.01), Elovl7(-0.06), Sptlc2(-0.09), Elovl1(-0.1), Elovl1(-0.1), Hacd4(-0.1), Hacd2(-0.1), Hacd2(-0.1), Cers3(-0.12), Sptlc1(-0.13), Kdsr(-0.17), Cers2(-0.2), Degs1(-0.26), Hacd3(-0.27), Elovl2(-0.28), Degs2(-0.46), Hacd1(-0.56), Sptssb(-0.74),
retrograde protein transport, ER to cytosol	0.064695	0.292352	0.001453	0.0112243	18	0.548006	0.155894	0.0279011	0.0148304	0.0464889	Herpud1(0.17), Sel1l(0.06), Hsp90b1(0.05), Os9(0.05), Vimp(0.04), Nploc4(0.04), Syvn1(0.02), Ufd1l(0), Faf2(-0.04), Vcp(-0.04), Vcp(-0.04), Erlec1(-0.07), Derl2(-0.08), Derl2(-0.08), Sec61b(-0.11), Derl1(-0.14), Tmem129(-0.14), Aup1(-0.28),
protein phosphatase type 2A regulator activity	0.0786742	0.316457	0.00149652	0.0115353	14	0.206688	0.0166142	0.139392	0.0625601	0.14148	Ppp2r2b(0.21), Ppp2r5a(0.08), Ppme1(0.05), Ppp2r5e(0.03), Ppp2r2a(0.01), Ppp2r1a(-0.02), Ppp2r1b(-0.02), Ppp2r3d(-0.03), Ppp2r2d(-0.04), Igbp1(-0.08), Igbp1(-0.08), Ppp2r5c(-0.1), Ptpa(-0.14), Ptpa(-0.14),
lipid metabolic process	0.0254518	0.0788752	0.00150214	0.0115534	380	0.660592	0.412964	0.0348491	0.0145916	0.00229582	Ptgs2(1.16), Akr1c21(0.92), Cpt1b(0.79), Ch25h(0.76), Apob(0.76), Apob(0.76), Apob(0.76), Apob(0.76), Acsl6(0.72), Liph(0.71), Sgms2(0.67), Il1rn(0.62), Aspg(0.57), Mboat1(0.56), Tbxas1(0.55), Baat(0.54), Sptlc3(0.54), Lcat(0.51), Hpgds(0.5), Acer2(0.5), Acsm5(0.49), Neu2(0.46), Aloxe3(0.45), Alox12(0.42), Lpin2(0.41), Cers4(0.4), Pld1(0.39), Plce1(0.39), Soat2(0.39), Pmvk(0.38), Sorl1(0.36), Cyp…
nucleosomal DNA binding	0.0611405	0.231387	0.00150819	0.0115748	29	0.149483	0.0782933	0.140368	0.0419063	0.0854408	Cenpa(0.38), Chd4(0.21), Gatad2b(0.21), Hmgn3(0.2), H3f3b(0.15), H3f3b(0.15), Actb(0.1), Hmgn5(0.09), Hdac1(0.09), Mta2(0.07), H2afz(0.07), Smarcc2(0.06), Mbd2(0.04), Rbbp4(-0.02), Smarca4(-0.04), Smarce1(-0.08), Hdac2(-0.09), H2afy(-0.09), H2afy(-0.09), H3f3a(-0.1), H3f3a(-0.1), Hnrnpc(-0.1), Smarcd2(-0.1), Smarcc1(-0.15), Actl6a(-0.18), Hmgn1(-0.19), Mbd3(-0.21), Smarcb1(-0.21), Rcc1(-0.48),
response to oxidative stress	0.0365396	0.125277	0.00153466	0.011727	125	0.856628	0.3698	0.0137176	0.00355137	0.0070247	Gpx6(1.66), Ptgs2(1.16), Mmp9(0.59), Tlr4(0.55), Car3(0.52), Epas1(0.48), Epas1(0.48), Mt3(0.4), Sirt1(0.4), Trpm2(0.39), Rcan2(0.39), Txnip(0.32), Jak2(0.31), Ptgs1(0.31), Ercc1(0.29), Msrb3(0.29), Bcl2(0.24), Abcc1(0.24), Lrrk2(0.23), Ercc6(0.23), Ercc6(0.23), Hmox1(0.21), Nfkb1(0.21), Gpx7(0.21), Abl1(0.19), Abl1(0.19), Chrna4(0.17), Gab1(0.17), Rcan1(0.17), Gpx8(0.17), Ppp1r15b(0.16), Ppp1r15…
ubiquitin-ubiquitin ligase activity	0.0748808	0.320141	0.00156087	0.0119016	12	0.419117	0.0529957	0.0383128	0.057022	0.0753365	Ubr5(0.28), Ube4b(0.04), Ppil2(-0.03), Ppil2(-0.03), Amfr(-0.04), Ube4a(-0.05), Anapc11(-0.11), Stub1(-0.12), Ube2k(-0.14), Rbx1(-0.15), Prpf19(-0.22), Ubox5(-0.32),
VCP-NPL4-UFD1 AAA ATPase complex	0.0601151	0.371298	0.00159721	0.0121525	12	0.290436	0.179389	0.0806934	0.0237431	0.0408755	Ubxn7(0.23), Cav1(0.16), Nploc4(0.04), Ufd1l(0), Ufd1l(0), Ufd1l(0), Faf2(-0.04), Vcp(-0.04), Vcp(-0.04), Vcp(-0.04), Ubxn1(-0.18), Faf1(-0.2),
mitochondrial electron transport, ubiquinol to cytochrome c	0.07225	0.372893	0.00162743	0.0123559	10	0.134298	0.0901465	0.105285	0.204411	0.0199063	Mecp2(0.24), CYTB(0.08), Uqcrb(-0.04), Cycs(-0.11), Uqcrh(-0.11), Uqcrc1(-0.12), Uqcrc2(-0.13), Pmpcb(-0.16), Uqcr10(-0.19), Uqcc3(-0.25),
lysosome organization	0.0440919	0.205927	0.00164755	0.0124819	42	0.201878	0.0844415	0.017586	0.0837997	0.190995	Lyst(0.44), Tpcn2(0.25), Lrrk2(0.23), Abca1(0.14), Fam160a2(0.14), Hook3(0.14), Zkscan3(0.11), Zkscan3(0.11), Vps18(0.08), Vps18(0.08), Cln3(0.07), Vps11(0.05), Gnptab(0.04), Myo7a(0.01), Mbtps1(0.01), Tfeb(-0.01), Spg11(-0.01), Becn1(-0.02), Cln8(-0.05), Hps4(-0.05), Hps4(-0.05), Chmp5(-0.08), Hook1(-0.09), Mfsd8(-0.1), Ppt1(-0.11), Aktip(-0.12), Tpp1(-0.14), Hexa(-0.14), Hexa(-0.14), Hexb(-0.14…
branched-chain amino acid catabolic process	0.0644365	0.353754	0.00165329	0.0124986	10	0.158904	0.064699	0.286903	0.0838734	0.0173644	Bcat2(0.01), Bcat2(0.01), Bckdhb(-0.08), Auh(-0.09), Hibadh(-0.11), Bckdha(-0.17), Bckdk(-0.17), Acad8(-0.18), Hibch(-0.19), Bcat1(-0.39),
acyl-CoA metabolic process	0.0092711	0.285508	0.00167871	0.0126637	30	0.88683	0.39204	0.130308	4.42388e-05	0.00716239	Baat(0.54), Acot5(0.35), Acot10(0.2), Acadsb(0.1), Acot11(0.07), Scp2(0.04), Acot9(-0.02), Gpat4(-0.03), Ces1d(-0.05), Gcdh(-0.06), Ehhadh(-0.07), Slc27a3(-0.08), Hnf4a(-0.1), Oxsm(-0.13), Acot3(-0.14), Acot3(-0.14), Acot2(-0.15), Acot2(-0.15), Acot4(-0.15), Acot4(-0.15), Gpam(-0.16), Acot7(-0.19), Hmgcl(-0.22), Acot8(-0.24), Acot8(-0.24), Acot6(-0.36), Acot12(-0.43), Acnat2(-0.46), Acnat1(-0.5),…
ER-associated misfolded protein catabolic process	0.0793834	0.297454	0.00178331	0.0134241	14	0.249139	0.0980347	0.0581071	0.0210817	0.172731	Uggt2(0.33), Rnf185(0.06), Uggt1(0.01), Ufd1l(0), Rnf5(-0.04), Rnf5(-0.04), Vcp(-0.04), Sdf2(-0.14), Tor1a(-0.14), Derl1(-0.14), Sdf2l1(-0.21), Sdf2l1(-0.21), Pomt1(-0.22), Pomt2(-0.25),
fatty acid elongase activity	0.0735085	0.370234	0.00182612	0.0137172	10	0.0964018	0.0775459	0.0251682	0.174444	0.188968	Elovl6(0.07), Elovl6(0.07), Elovl5(-0.01), Elovl5(-0.01), Elovl7(-0.06), Elovl7(-0.06), Elovl1(-0.1), Elovl1(-0.1), Elovl2(-0.28), Elovl2(-0.28),
positive regulation of mitochondrial calcium ion concentration	0.0843562	0.330211	0.00186893	0.0140091	12	0.119718	0.143504	0.111425	0.0761691	0.0556905	Atp2a1(0.84), Mcur1(0.02), Mcur1(0.02), Rap1gds1(0.01), Mcu(-0.02), Mcu(-0.02), Micu2(-0.04), Tgm2(-0.05), Tgm2(-0.05), Bcap31(-0.13), Micu1(-0.13), Fis1(-0.14),
chromosome segregation	0.0431964	0.144268	0.00188531	0.014102	77	0.1366	0.312988	0.00458054	0.347598	0.0289542	Birc5(0.33), Brd4(0.33), Ndel1(0.29), Ndel1(0.29), Phf13(0.29), Ddx3x(0.26), Ddx3x(0.26), Spag5(0.26), Cdk5rap2(0.24), Usp9x(0.22), Cenpc1(0.21), Tlk2(0.19), Ddx3y(0.18), Mis12(0.16), Dsn1(0.14), Setdb2(0.14), Top1(0.13), Ube2i(0.12), Mau2(0.11), Stag2(0.09), Mis18a(0.09), Stag1(0.06), Incenp(0.04), Rad21(0.03), Nde1(0.03), Nek9(0.03), Rgs14(0.02), Cenpw(0.02), Cenpn(0.02), Ctcf(-0.01), Zfp207(-0…
lipid storage	0.0583624	0.221611	0.00192438	0.0143638	29	0.270224	0.251665	0.0802931	0.0475615	0.0174535	Cry2(0.44), Nrip1(0.39), 4932438A13Rik(0.28), Dgat1(0.2), Cav1(0.16), Cidea(0.11), Stat5a(0.1), Stat5b(0.07), Pnpla2(0.02), B4galnt1(-0.03), Cry1(-0.08), Abhd4(-0.08), Dgat2(-0.12), Dgat2(-0.12), Hexa(-0.14), Hexb(-0.14), Hexb(-0.14), Bscl2(-0.18), Ldah(-0.18), Gm2a(-0.21), Angptl3(-0.26), Fitm1(-0.32), Plin2(-0.34), Fitm2(-0.4), Cd36(-0.41), Cd36(-0.41), Apoa1(-0.5), Plin5(-0.55), Plin5(-0.55),
npBAF complex	0.0718034	0.290245	0.0019301	0.0143762	15	0.0299565	0.187737	0.153717	0.019674	0.27028	Smarca2(0.37), Arid1a(0.31), Smarcc2(0.06), Smarca4(-0.04), Smarca4(-0.04), Smarcd1(-0.04), Ss18(-0.04), Smarcd3(-0.05), Smarcd3(-0.05), Smarce1(-0.08), Phf10(-0.14), Smarcc1(-0.15), Actl6a(-0.18), Actl6a(-0.18), Smarcb1(-0.21),
N-ethylmaleimide reductase activity	0.0550154	0.219569	0.00197049	0.0145241	29	0.459013	0.225669	0.0340897	0.0141527	0.0578255	Cybrd1(0.71), Heph(0.38), Gfod1(0.36), Kdm1a(0.17), Fmo1(0.16), Aifm3(0.16), 4833439L19Rik(0.07), Phyhd1(0.02), Glyr1(0.01), Fa2h(0.01), Gfod2(-0.05), Vat1(-0.07), Pyroxd2(-0.07), Sccpdh(-0.11), Marc2(-0.14), Cryzl1(-0.15), Cbr4(-0.17), Enox2(-0.18), Enox1(-0.18), Cyb561a3(-0.19), Aifm2(-0.22), Kdm1b(-0.22), Zadh2(-0.22), Foxred1(-0.22), Frrs1(-0.24), BC026585(-0.24), Hsdl2(-0.34), Oxnad1(-0.36),…
reduced coenzyme F420 dehydrogenase activity	0.0550154	0.219569	0.00197049	0.0145241	29	0.459013	0.225669	0.0340897	0.0141527	0.0578255	Cybrd1(0.71), Heph(0.38), Gfod1(0.36), Kdm1a(0.17), Fmo1(0.16), Aifm3(0.16), 4833439L19Rik(0.07), Phyhd1(0.02), Glyr1(0.01), Fa2h(0.01), Gfod2(-0.05), Vat1(-0.07), Pyroxd2(-0.07), Sccpdh(-0.11), Marc2(-0.14), Cryzl1(-0.15), Cbr4(-0.17), Enox2(-0.18), Enox1(-0.18), Cyb561a3(-0.19), Aifm2(-0.22), Kdm1b(-0.22), Zadh2(-0.22), Foxred1(-0.22), Frrs1(-0.24), BC026585(-0.24), Hsdl2(-0.34), Oxnad1(-0.36),…
sulfur oxygenase reductase activity	0.0550154	0.219569	0.00197049	0.0145241	29	0.459013	0.225669	0.0340897	0.0141527	0.0578255	Cybrd1(0.71), Heph(0.38), Gfod1(0.36), Kdm1a(0.17), Fmo1(0.16), Aifm3(0.16), 4833439L19Rik(0.07), Phyhd1(0.02), Glyr1(0.01), Fa2h(0.01), Gfod2(-0.05), Vat1(-0.07), Pyroxd2(-0.07), Sccpdh(-0.11), Marc2(-0.14), Cryzl1(-0.15), Cbr4(-0.17), Enox2(-0.18), Enox1(-0.18), Cyb561a3(-0.19), Aifm2(-0.22), Kdm1b(-0.22), Zadh2(-0.22), Foxred1(-0.22), Frrs1(-0.24), BC026585(-0.24), Hsdl2(-0.34), Oxnad1(-0.36),…
malolactic enzyme activity	0.0550154	0.219569	0.00197049	0.0145241	29	0.459013	0.225669	0.0340897	0.0141527	0.0578255	Cybrd1(0.71), Heph(0.38), Gfod1(0.36), Kdm1a(0.17), Fmo1(0.16), Aifm3(0.16), 4833439L19Rik(0.07), Phyhd1(0.02), Glyr1(0.01), Fa2h(0.01), Gfod2(-0.05), Vat1(-0.07), Pyroxd2(-0.07), Sccpdh(-0.11), Marc2(-0.14), Cryzl1(-0.15), Cbr4(-0.17), Enox2(-0.18), Enox1(-0.18), Cyb561a3(-0.19), Aifm2(-0.22), Kdm1b(-0.22), Zadh2(-0.22), Foxred1(-0.22), Frrs1(-0.24), BC026585(-0.24), Hsdl2(-0.34), Oxnad1(-0.36),…
epoxyqueuosine reductase activity	0.0550154	0.219569	0.00197049	0.0145241	29	0.459013	0.225669	0.0340897	0.0141527	0.0578255	Cybrd1(0.71), Heph(0.38), Gfod1(0.36), Kdm1a(0.17), Fmo1(0.16), Aifm3(0.16), 4833439L19Rik(0.07), Phyhd1(0.02), Glyr1(0.01), Fa2h(0.01), Gfod2(-0.05), Vat1(-0.07), Pyroxd2(-0.07), Sccpdh(-0.11), Marc2(-0.14), Cryzl1(-0.15), Cbr4(-0.17), Enox2(-0.18), Enox1(-0.18), Cyb561a3(-0.19), Aifm2(-0.22), Kdm1b(-0.22), Zadh2(-0.22), Foxred1(-0.22), Frrs1(-0.24), BC026585(-0.24), Hsdl2(-0.34), Oxnad1(-0.36),…
lipid particle	0.0504125	0.149695	0.00198103	0.0145406	64	0.300471	0.0459057	0.104835	0.51347	0.00129417	Hilpda(0.51), Hilpda(0.51), Plin4(0.49), Stard13(0.29), Ckap4(0.22), Hsd17b11(0.21), Pitpnm1(0.19), Acsl4(0.19), Lpcat2(0.18), Cav1(0.16), Cav2(0.16), Atg2a(0.15), Lipe(0.12), Cidea(0.11), Cidea(0.11), Traf6(0.11), Rsad2(0.06), Lpcat1(0.05), Katna1(0.03), Rab3gap1(0.03), Pnpla2(0.02), Pnpla2(0.02), Anxa2(0.01), Nsdhl(0.01), Atg2b(0.01), Spg20(0.01), Acsl3(-0.02), Abhd5(-0.03), Abhd5(-0.03), Faf2(…
thiamine-pyrophosphatase activity	0.0797192	0.329355	0.00200952	0.0145406	11	0.139453	0.246517	0.0274466	0.201018	0.0282968	Entpd7(0.29), Rhobtb3(0.16), Nudt19(-0.04), Nudt4(-0.13), Dxo(-0.13), Nudt17(-0.17), Lsg1(-0.27), Nudt7(-0.3), Nudt6(-0.36), Entpd2(-0.39), Nudt8(-0.43),
UDP-2,3-diacylglucosamine hydrolase activity	0.0797192	0.329355	0.00200952	0.0145406	11	0.139453	0.246517	0.0274466	0.201018	0.0282968	Entpd7(0.29), Rhobtb3(0.16), Nudt19(-0.04), Nudt4(-0.13), Dxo(-0.13), Nudt17(-0.17), Lsg1(-0.27), Nudt7(-0.3), Nudt6(-0.36), Entpd2(-0.39), Nudt8(-0.43),
dATP pyrophosphohydrolase activity	0.0797192	0.329355	0.00200952	0.0145406	11	0.139453	0.246517	0.0274466	0.201018	0.0282968	Entpd7(0.29), Rhobtb3(0.16), Nudt19(-0.04), Nudt4(-0.13), Dxo(-0.13), Nudt17(-0.17), Lsg1(-0.27), Nudt7(-0.3), Nudt6(-0.36), Entpd2(-0.39), Nudt8(-0.43),
dihydroneopterin monophosphate phosphatase activity	0.0797192	0.329355	0.00200952	0.0145406	11	0.139453	0.246517	0.0274466	0.201018	0.0282968	Entpd7(0.29), Rhobtb3(0.16), Nudt19(-0.04), Nudt4(-0.13), Dxo(-0.13), Nudt17(-0.17), Lsg1(-0.27), Nudt7(-0.3), Nudt6(-0.36), Entpd2(-0.39), Nudt8(-0.43),
dihydroneopterin triphosphate pyrophosphohydrolase activity	0.0797192	0.329355	0.00200952	0.0145406	11	0.139453	0.246517	0.0274466	0.201018	0.0282968	Entpd7(0.29), Rhobtb3(0.16), Nudt19(-0.04), Nudt4(-0.13), Dxo(-0.13), Nudt17(-0.17), Lsg1(-0.27), Nudt7(-0.3), Nudt6(-0.36), Entpd2(-0.39), Nudt8(-0.43),
dTTP diphosphatase activity	0.0797192	0.329355	0.00200952	0.0145406	11	0.139453	0.246517	0.0274466	0.201018	0.0282968	Entpd7(0.29), Rhobtb3(0.16), Nudt19(-0.04), Nudt4(-0.13), Dxo(-0.13), Nudt17(-0.17), Lsg1(-0.27), Nudt7(-0.3), Nudt6(-0.36), Entpd2(-0.39), Nudt8(-0.43),
phosphocholine hydrolase activity	0.0797192	0.329355	0.00200952	0.0145406	11	0.139453	0.246517	0.0274466	0.201018	0.0282968	Entpd7(0.29), Rhobtb3(0.16), Nudt19(-0.04), Nudt4(-0.13), Dxo(-0.13), Nudt17(-0.17), Lsg1(-0.27), Nudt7(-0.3), Nudt6(-0.36), Entpd2(-0.39), Nudt8(-0.43),
retrograde transport, endosome to Golgi	0.0829764	0.170163	0.00203466	0.0146911	60	0.290104	0.155961	0.0434828	0.0294658	0.10401	Tbc1d10c(0.49), Erc1(0.41), Spag9(0.26), Dennd5a(0.23), Cltc(0.22), Dennd2a(0.22), Fam109a(0.21), Rgp1(0.19), Rgp1(0.19), Stx5a(0.18), Rhobtb3(0.16), Tbc1d10a(0.16), Ric1(0.16), Stx6(0.14), Pikfyve(0.11), Gosr2(0.11), Gbf1(0.11), Dctn1(0.1), Gcc2(0.08), Rab6a(0.07), Tbc1d10b(0.07), Evi5(0.06), Rab6b(0.05), Gosr1(0.03), Stx16(0.02), Ankfy1(0), Vps54(0), Vps54(0), Bet1l(-0.01), Ykt6(-0.01), Tbc1d17…
carbohydrate metabolic process	0.0373116	0.0978754	0.0020962	0.0151046	160	0.333667	0.260075	0.355413	0.00625117	0.00692282	Hk2(0.79), Chil1(0.71), A3galt2(0.68), Sec1(0.63), Chil3(0.59), Hk3(0.53), Phkg1(0.52), Chst1(0.48), Gfpt2(0.47), Neu2(0.46), Amy1(0.44), B4galt6(0.44), Ppp1r3b(0.44), Chst2(0.43), Hkdc1(0.4), B3gat2(0.39), Neu3(0.35), Pygl(0.35), Hk1(0.29), Kl(0.27), Chst8(0.26), Ppp1r3c(0.23), Mgat4a(0.23), Man2a1(0.22), Gsk3b(0.22), Chst11(0.22), Pygm(0.21), Man2a2(0.21), Ggta1(0.18), B4galt1(0.18), Pgm1(0.18)…
oxidoreductase activity, acting on the CH-OH group of donors, NAD or NADP as acceptor	0.0688957	0.235172	0.00223311	0.0160584	24	0.415433	0.205659	0.100537	0.0390103	0.011255	Hsd3b2(0.68), Hsd3b3(0.49), Hmgcr(0.15), Ctbp2(0.12), Adhfe1(0.05), Mdh1(0.01), Nsdhl(0.01), Idh2(-0.04), Ctbp1(-0.06), Uevld(-0.06), Hsd3b7(-0.06), Idh1(-0.08), Sdr42e1(-0.08), Idh3g(-0.09), Ldhb(-0.09), Mdh2(-0.09), Ldha(-0.16), Grhpr(-0.17), Ugdh(-0.18), Gpd1(-0.24), Idh3a(-0.33), Gpd1l(-0.36), Phgdh(-0.68), Fam213b(-0.75),
voltage-gated sodium channel activity	0.046219	0.34959	0.00223816	0.0160621	13	0.00477143	0.265901	0.539873	0.0827523	0.0320067	Pkd2(0.3), Asic2(0.14), Scn1b(0.03), Scn2b(0.02), Scn7a(-0.02), Scn5a(-0.05), Scn5a(-0.05), Catsper4(-0.08), Hcn3(-0.22), Scn4b(-0.25), Scn4b(-0.25), Scn4b(-0.25), Hcn2(-0.54),
fatty acid elongation	0.0776143	0.343043	0.00227057	0.0162617	10	0.351966	0.139916	0.0439827	0.0783821	0.0389713	Pecr(0.15), Elovl6(0.07), Hacd4(-0.1), Hacd4(-0.1), Hacd2(-0.1), Hacd2(-0.1), Tecr(-0.15), Hacd3(-0.27), Hacd3(-0.27), Hacd1(-0.56),
response to gamma radiation	0.067742	0.227488	0.00231638	0.0165563	25	0.0441872	0.029935	0.126625	0.349608	0.111838	Pml(0.32), Ptprc(0.31), Trp63(0.27), Bcl2(0.24), Ercc6(0.23), Pnp(0.15), Dcun1d3(0.13), Apobec1(0.02), Brca2(0.02), Sod2(0.02), Prkaa1(0.02), Xrcc2(-0.01), Lig4(-0.03), Prkdc(-0.04), Men1(-0.06), Xrcc4(-0.12), Bak1(-0.18), Gpx1(-0.21), Tigar(-0.22), Bax(-0.34), Trp53(-0.49), Trp53(-0.49), Trp53(-0.49), Chek2(-0.51), Myc(-1.62),
negative regulation of endoplasmic reticulum stress-induced intrinsic apoptotic signaling pathway	0.0746405	0.258784	0.00233479	0.0166542	23	0.410737	0.207333	0.0277249	0.0268245	0.0750119	Lrrk2(0.23), Ptpn1(0.19), Herpud1(0.17), Vimp(0.04), Syvn1(0.02), Syvn1(0.02), Wfs1(-0.01), Xbp1(-0.02), Park2(-0.02), Park2(-0.02), Txndc12(-0.04), Creb3l1(-0.07), Creb3l1(-0.07), Opa1(-0.07), Opa1(-0.07), Creb3(-0.09), Tmbim6(-0.1), Tmbim6(-0.1), Grina(-0.15), Grina(-0.15), Park7(-0.2), Park7(-0.2), Ikbkg(-0.21),
binding of sperm to zona pellucida	0.0654587	0.267854	0.00236882	0.0168629	17	0.278164	0.0262834	0.23593	0.0720177	0.0538856	Hspa1b(1.37), Hspa1l(0.44), B4galt1(0.18), B4galt1(0.18), Adam1a(0.16), Spa17(0.02), Arsa(0.01), Fetub(-0.05), Tcp1(-0.17), Zpbp(-0.2), Cct4(-0.21), Cct8(-0.21), Cct7(-0.25), Cct2(-0.27), Cct3(-0.4), Cct5(-0.43), Pcsk4(-0.49),
transferase activity, transferring hexosyl groups	0.0679421	0.279129	0.00240228	0.0170668	16	0.121261	0.0982756	0.0934762	0.0265622	0.277032	A3galt2(0.68), Mgat4a(0.23), Ggta1(0.18), Alg13(0.04), Pigm(-0.02), B4galnt1(-0.03), Ugt1a6a(-0.12), Ugt1a2(-0.23), Ugt3a2(-0.23), Alg6(-0.23), Ugt3a1(-0.24), Mgat4b(-0.28), Ugt1a1(-0.35), Ugt8a(-0.36), Alg3(-0.48), Alg8(-0.53),
ATP-dependent peptidase activity	0.0652248	0.38084	0.00242269	0.0171773	11	0.331274	0.253229	0.0496986	0.015752	0.0807388	Lonrf3(0.49), Crbn(-0.05), Lonp2(-0.05), Yme1l1(-0.08), Spg7(-0.08), Afg3l1(-0.09), Clpx(-0.1), Clpx(-0.1), Afg3l2(-0.15), Lonp1(-0.16), Lonp1(-0.16),
DNA damage checkpoint	0.0792999	0.207757	0.00245843	0.0173959	31	0.172268	0.102948	0.0230797	0.114535	0.188909	Dot1l(0.33), Hinfp(0.29), Zak(0.24), Trp53bp1(0.17), Pea15a(0.16), Ptpn11(0.16), Usp28(0.07), Usp28(0.07), Tiprl(0.03), Mapk14(0), Rad9a(-0.01), Rad9a(-0.01), Clock(-0.02), Chek1(-0.05), Chek1(-0.05), Chek1(-0.05), Rad17(-0.05), Rad9b(-0.06), Atr(-0.06), Atr(-0.06), Nbn(-0.07), Ints7(-0.08), Atm(-0.13), Rhno1(-0.15), Hus1(-0.17), Hus1(-0.17), Tipin(-0.17), E2f1(-0.36), Rad1(-0.37), Rad1(-0.37), C…
Arp2/3 protein complex	0.059642	0.347366	0.0025357	0.0179068	15	0.0940332	0.0193322	0.104562	0.231125	0.186381	Arpc1b(0.15), Arpc1b(0.15), Actr3(0.06), Arpc3(0.03), Arpc3(0.03), Actr3b(0.03), Actr2(0.01), Arpc2(0.01), Arpc2(0.01), Arpc1a(-0.08), Arpc5(-0.13), Arpc5(-0.13), Arpc4(-0.15), Arpc4(-0.15), Arpc5l(-0.23),
phospholipid metabolic process	0.0795979	0.209743	0.002546	0.0179437	27	0.0289262	0.10817	0.161819	0.165154	0.121013	Aspg(0.57), Lcat(0.51), Lyst(0.44), Gata6(0.43), Plpp3(0.36), Plpp1(0.25), Plppr3(0.21), Snca(-0.02), Plpp5(-0.02), Cln8(-0.05), Cln8(-0.05), Proca1(-0.05), Plppr4(-0.07), Pla2g5(-0.08), Acp6(-0.1), Lpcat4(-0.12), Plppr2(-0.21), Pla2g16(-0.24), Napepld(-0.25), Angptl3(-0.26), Plpp2(-0.26), Pla2g12a(-0.3), Pemt(-0.31), Pla2g2e(-0.47), Apoa1(-0.5), Plppr1(-0.76), Pcsk9(-0.81),
ER to Golgi transport vesicle	0.0907763	0.23518	0.00255831	0.0179947	23	0.214405	0.0734133	0.0471044	0.0725063	0.187525	Sec24b(0.17), Vangl2(0.16), Golga2(0.16), Stx17(0.07), App(0.06), Sec23a(0.05), Ier3ip1(0.04), Sec23ip(0.04), Klhl12(0.04), Klhl12(0.04), Yipf6(0.03), Lman2l(0.03), Sec31a(-0.04), Sec31a(-0.04), Tex261(-0.06), Lman1(-0.07), Yif1b(-0.09), AI314180(-0.1), Ddhd2(-0.13), Yipf5(-0.14), Lman2(-0.18), Yif1a(-0.29), Pcsk9(-0.81),
monosaccharide binding	0.0828978	0.287124	0.00256398	0.0179987	14	0.283946	0.0156616	0.0865928	0.300787	0.0494493	Lgals3(0.27), Siglece(0.15), Fbp1(0.12), Upk1a(0.06), Gnpnat1(-0.02), Ogt(-0.04), Rpia(-0.1), Gpi1(-0.11), Pfkl(-0.13), Taldo1(-0.14), Rpe(-0.15), Tkt(-0.31), Fuom(-0.31), Pgls(-0.42),
mitochondrial DNA replication	0.0823808	0.302311	0.00266703	0.0186482	13	0.0978319	0.0635242	0.0619802	0.068901	0.3491	Rrm2b(0.09), Primpol(0.04), Primpol(0.04), Polg(0.03), Tk2(0.02), Slc25a33(-0.02), Mgme1(-0.07), Mgme1(-0.07), Rnaseh1(-0.1), Peo1(-0.43), Peo1(-0.43), Dnaja3(-0.44), Dna2(-0.65),
male germ cell nucleus	0.0900326	0.296044	0.0026868	0.0187493	13	0.0567649	0.0820483	0.0752146	0.20837	0.158516	Sycp1(1.01), Sycp3(0.52), Hspa2(0.29), Blm(0.12), Terf2(-0.02), Topbp1(-0.07), Rpa1(-0.08), Mlh1(-0.18), H2afx(-0.28), Mlh3(-0.38), Trip13(-0.43), Ran(-0.46), Rec8(-0.8),
ubiquitin-specific protease binding	0.0912637	0.305736	0.00271908	0.0189372	15	0.378957	0.174188	0.032356	0.047444	0.0731673	March6(0.19), Sart3(0.07), Bag6(0.06), Vimp(0.04), Syvn1(0.02), Syvn1(0.02), Park2(-0.02), Amfr(-0.04), Amfr(-0.04), Chmp3(-0.04), Vcp(-0.04), Vcp(-0.04), Derl1(-0.14), Park7(-0.2), Rad23a(-0.3),
protein tetramerization	0.0864336	0.193775	0.002908	0.0202132	32	0.419348	0.215705	0.0514758	0.0339788	0.0426537	Trpm6(0.83), Igf1r(0.33), Trp63(0.27), Cpsf7(0.21), Hmgcr(0.15), Sbf2(0.14), Cpsf6(0.13), Trpm7(0.08), Asl(0.08), Trpv5(0.06), Txnrd1(0.03), Dnm1(0.01), Nudt21(-0.02), Fh1(-0.07), Cutc(-0.11), Ache(-0.13), Uxs1(-0.13), Mtmr2(-0.14), Dhrs4(-0.15), Oxa1l(-0.16), Cat(-0.18), Cbr2(-0.18), Kcnc3(-0.18), Me1(-0.18), Hmgcl(-0.22), Shmt1(-0.24), Shmt2(-0.24), Ccl5(-0.34), Adsl(-0.39), Adsl(-0.39), Rps19(…
mRNA binding	0.0700094	0.109283	0.00291847	0.0202462	124	0.269751	0.20429	0.0150196	0.101281	0.10017	Noct(0.59), Zc3h12a(0.46), Rbm4(0.44), Celf4(0.4), Zfp36(0.37), Zfp36(0.37), Pcf11(0.37), Qk(0.36), Rc3h2(0.35), Ptbp2(0.33), Ago2(0.33), Rc3h1(0.33), BC005561(0.33), Zfp36l1(0.32), Zfp36l1(0.32), Samd4(0.31), Sf3b1(0.29), Hnrnpa3(0.27), Piwil2(0.26), Hsp90aa1(0.24), Mecp2(0.24), Rbm5(0.23), Rbfox2(0.22), Tpr(0.22), Purb(0.21), Slbp(0.21), Slbp(0.21), Dcp1a(0.21), Luc7l2(0.21), Esrp1(0.19), Rbm25…
anterograde axonal transport	0.0761561	0.244992	0.00303945	0.0210442	22	0.488253	0.0633941	0.0722493	0.0885633	0.0384133	Ap3b2(0.28), Kif1b(0.19), Hap1(0.11), Hap1(0.11), Ap3d1(0.1), Rab21(0.09), Ap3b1(0.03), Ap3m1(-0.04), Ap3m2(-0.05), Spg7(-0.08), Spast(-0.09), Sod1(-0.1), Bloc1s4(-0.11), Bloc1s6(-0.12), Snapin(-0.17), Dtnbp1(-0.18), Ap3s1(-0.19), Bloc1s3(-0.2), Bloc1s1(-0.22), Ap3s2(-0.23), Bloc1s2(-0.24), Bloc1s5(-0.3),
acyl-CoA dehydrogenase activity	0.0282766	0.359162	0.00311774	0.0212687	18	0.716799	0.488666	0.0740707	0.000508279	0.0268743	Acox3(0.19), Acad10(0.15), Acadsb(0.1), Acadsb(0.1), Ivd(0.06), Acadl(-0.05), Gcdh(-0.06), Acadvl(-0.08), Etfa(-0.08), Acad11(-0.09), Acadm(-0.13), Acad8(-0.18), Acad8(-0.18), Acad9(-0.19), Acox1(-0.2), Acox2(-0.21), Acads(-0.24), Acads(-0.24),
MHC class I protein binding	0.0915127	0.293612	0.00316838	0.0212687	13	0.261159	0.0824597	0.17807	0.0452643	0.072114	Cd244(0.22), Tap2(0.01), Pdia3(-0.03), Vcp(-0.04), Atp5b(-0.05), Atp5a1(-0.06), Bcap31(-0.13), Derl1(-0.14), H2-T23(-0.17), Tubb5(-0.19), Tap1(-0.33), Tap1(-0.33), Pilra(-0.57),
protein-N-terminal asparagine amidohydrolase activity	0.089045	0.264793	0.00319211	0.0212687	16	0.0873805	0.197975	0.116996	0.0520222	0.140754	Sirt1(0.4), Sirt3(0.12), Acer3(0.06), Naaa(0), Sirt7(-0.01), Wdyhv1(-0.04), Sirt2(-0.08), Sirt5(-0.08), Ntan1(-0.09), Macrod2(-0.14), Oard1(-0.17), Park7(-0.2), Sirt6(-0.22), Macrod1(-0.27), Sirt4(-0.34), Ydjc(-0.55),
UDP-3-O-[3-hydroxymyristoyl] N-acetylglucosamine deacetylase activity	0.089045	0.264793	0.00319211	0.0212687	16	0.0873805	0.197975	0.116996	0.0520222	0.140754	Sirt1(0.4), Sirt3(0.12), Acer3(0.06), Naaa(0), Sirt7(-0.01), Wdyhv1(-0.04), Sirt2(-0.08), Sirt5(-0.08), Ntan1(-0.09), Macrod2(-0.14), Oard1(-0.17), Park7(-0.2), Sirt6(-0.22), Macrod1(-0.27), Sirt4(-0.34), Ydjc(-0.55),
iprodione amidohydrolase activity	0.089045	0.264793	0.00319211	0.0212687	16	0.0873805	0.197975	0.116996	0.0520222	0.140754	Sirt1(0.4), Sirt3(0.12), Acer3(0.06), Naaa(0), Sirt7(-0.01), Wdyhv1(-0.04), Sirt2(-0.08), Sirt5(-0.08), Ntan1(-0.09), Macrod2(-0.14), Oard1(-0.17), Park7(-0.2), Sirt6(-0.22), Macrod1(-0.27), Sirt4(-0.34), Ydjc(-0.55),
(3,5-dichlorophenylurea)acetate amidohydrolase activity	0.089045	0.264793	0.00319211	0.0212687	16	0.0873805	0.197975	0.116996	0.0520222	0.140754	Sirt1(0.4), Sirt3(0.12), Acer3(0.06), Naaa(0), Sirt7(-0.01), Wdyhv1(-0.04), Sirt2(-0.08), Sirt5(-0.08), Ntan1(-0.09), Macrod2(-0.14), Oard1(-0.17), Park7(-0.2), Sirt6(-0.22), Macrod1(-0.27), Sirt4(-0.34), Ydjc(-0.55),
4'-(2-hydroxyisopropyl)phenylurea amidohydrolase activity	0.089045	0.264793	0.00319211	0.0212687	16	0.0873805	0.197975	0.116996	0.0520222	0.140754	Sirt1(0.4), Sirt3(0.12), Acer3(0.06), Naaa(0), Sirt7(-0.01), Wdyhv1(-0.04), Sirt2(-0.08), Sirt5(-0.08), Ntan1(-0.09), Macrod2(-0.14), Oard1(-0.17), Park7(-0.2), Sirt6(-0.22), Macrod1(-0.27), Sirt4(-0.34), Ydjc(-0.55),
didemethylisoproturon amidohydrolase activity	0.089045	0.264793	0.00319211	0.0212687	16	0.0873805	0.197975	0.116996	0.0520222	0.140754	Sirt1(0.4), Sirt3(0.12), Acer3(0.06), Naaa(0), Sirt7(-0.01), Wdyhv1(-0.04), Sirt2(-0.08), Sirt5(-0.08), Ntan1(-0.09), Macrod2(-0.14), Oard1(-0.17), Park7(-0.2), Sirt6(-0.22), Macrod1(-0.27), Sirt4(-0.34), Ydjc(-0.55),
N-isopropylacetanilide amidohydrolase activity	0.089045	0.264793	0.00319211	0.0212687	16	0.0873805	0.197975	0.116996	0.0520222	0.140754	Sirt1(0.4), Sirt3(0.12), Acer3(0.06), Naaa(0), Sirt7(-0.01), Wdyhv1(-0.04), Sirt2(-0.08), Sirt5(-0.08), Ntan1(-0.09), Macrod2(-0.14), Oard1(-0.17), Park7(-0.2), Sirt6(-0.22), Macrod1(-0.27), Sirt4(-0.34), Ydjc(-0.55),
N-cyclohexylformamide amidohydrolase activity	0.089045	0.264793	0.00319211	0.0212687	16	0.0873805	0.197975	0.116996	0.0520222	0.140754	Sirt1(0.4), Sirt3(0.12), Acer3(0.06), Naaa(0), Sirt7(-0.01), Wdyhv1(-0.04), Sirt2(-0.08), Sirt5(-0.08), Ntan1(-0.09), Macrod2(-0.14), Oard1(-0.17), Park7(-0.2), Sirt6(-0.22), Macrod1(-0.27), Sirt4(-0.34), Ydjc(-0.55),
isonicotinic acid hydrazide hydrolase activity	0.089045	0.264793	0.00319211	0.0212687	16	0.0873805	0.197975	0.116996	0.0520222	0.140754	Sirt1(0.4), Sirt3(0.12), Acer3(0.06), Naaa(0), Sirt7(-0.01), Wdyhv1(-0.04), Sirt2(-0.08), Sirt5(-0.08), Ntan1(-0.09), Macrod2(-0.14), Oard1(-0.17), Park7(-0.2), Sirt6(-0.22), Macrod1(-0.27), Sirt4(-0.34), Ydjc(-0.55),
cis-aconitamide amidase activity	0.089045	0.264793	0.00319211	0.0212687	16	0.0873805	0.197975	0.116996	0.0520222	0.140754	Sirt1(0.4), Sirt3(0.12), Acer3(0.06), Naaa(0), Sirt7(-0.01), Wdyhv1(-0.04), Sirt2(-0.08), Sirt5(-0.08), Ntan1(-0.09), Macrod2(-0.14), Oard1(-0.17), Park7(-0.2), Sirt6(-0.22), Macrod1(-0.27), Sirt4(-0.34), Ydjc(-0.55),
gamma-N-formylaminovinylacetate hydrolase activity	0.089045	0.264793	0.00319211	0.0212687	16	0.0873805	0.197975	0.116996	0.0520222	0.140754	Sirt1(0.4), Sirt3(0.12), Acer3(0.06), Naaa(0), Sirt7(-0.01), Wdyhv1(-0.04), Sirt2(-0.08), Sirt5(-0.08), Ntan1(-0.09), Macrod2(-0.14), Oard1(-0.17), Park7(-0.2), Sirt6(-0.22), Macrod1(-0.27), Sirt4(-0.34), Ydjc(-0.55),
N2-acetyl-L-lysine deacetylase activity	0.089045	0.264793	0.00319211	0.0212687	16	0.0873805	0.197975	0.116996	0.0520222	0.140754	Sirt1(0.4), Sirt3(0.12), Acer3(0.06), Naaa(0), Sirt7(-0.01), Wdyhv1(-0.04), Sirt2(-0.08), Sirt5(-0.08), Ntan1(-0.09), Macrod2(-0.14), Oard1(-0.17), Park7(-0.2), Sirt6(-0.22), Macrod1(-0.27), Sirt4(-0.34), Ydjc(-0.55),
O-succinylbenzoate synthase activity	0.089045	0.264793	0.00319211	0.0212687	16	0.0873805	0.197975	0.116996	0.0520222	0.140754	Sirt1(0.4), Sirt3(0.12), Acer3(0.06), Naaa(0), Sirt7(-0.01), Wdyhv1(-0.04), Sirt2(-0.08), Sirt5(-0.08), Ntan1(-0.09), Macrod2(-0.14), Oard1(-0.17), Park7(-0.2), Sirt6(-0.22), Macrod1(-0.27), Sirt4(-0.34), Ydjc(-0.55),
indoleacetamide hydrolase activity	0.089045	0.264793	0.00319211	0.0212687	16	0.0873805	0.197975	0.116996	0.0520222	0.140754	Sirt1(0.4), Sirt3(0.12), Acer3(0.06), Naaa(0), Sirt7(-0.01), Wdyhv1(-0.04), Sirt2(-0.08), Sirt5(-0.08), Ntan1(-0.09), Macrod2(-0.14), Oard1(-0.17), Park7(-0.2), Sirt6(-0.22), Macrod1(-0.27), Sirt4(-0.34), Ydjc(-0.55),
N-acetylcitrulline deacetylase activity	0.089045	0.264793	0.00319211	0.0212687	16	0.0873805	0.197975	0.116996	0.0520222	0.140754	Sirt1(0.4), Sirt3(0.12), Acer3(0.06), Naaa(0), Sirt7(-0.01), Wdyhv1(-0.04), Sirt2(-0.08), Sirt5(-0.08), Ntan1(-0.09), Macrod2(-0.14), Oard1(-0.17), Park7(-0.2), Sirt6(-0.22), Macrod1(-0.27), Sirt4(-0.34), Ydjc(-0.55),
N-acetylgalactosamine-6-phosphate deacetylase activity	0.089045	0.264793	0.00319211	0.0212687	16	0.0873805	0.197975	0.116996	0.0520222	0.140754	Sirt1(0.4), Sirt3(0.12), Acer3(0.06), Naaa(0), Sirt7(-0.01), Wdyhv1(-0.04), Sirt2(-0.08), Sirt5(-0.08), Ntan1(-0.09), Macrod2(-0.14), Oard1(-0.17), Park7(-0.2), Sirt6(-0.22), Macrod1(-0.27), Sirt4(-0.34), Ydjc(-0.55),
diacetylchitobiose deacetylase activity	0.089045	0.264793	0.00319211	0.0212687	16	0.0873805	0.197975	0.116996	0.0520222	0.140754	Sirt1(0.4), Sirt3(0.12), Acer3(0.06), Naaa(0), Sirt7(-0.01), Wdyhv1(-0.04), Sirt2(-0.08), Sirt5(-0.08), Ntan1(-0.09), Macrod2(-0.14), Oard1(-0.17), Park7(-0.2), Sirt6(-0.22), Macrod1(-0.27), Sirt4(-0.34), Ydjc(-0.55),
chitooligosaccharide deacetylase activity	0.089045	0.264793	0.00319211	0.0212687	16	0.0873805	0.197975	0.116996	0.0520222	0.140754	Sirt1(0.4), Sirt3(0.12), Acer3(0.06), Naaa(0), Sirt7(-0.01), Wdyhv1(-0.04), Sirt2(-0.08), Sirt5(-0.08), Ntan1(-0.09), Macrod2(-0.14), Oard1(-0.17), Park7(-0.2), Sirt6(-0.22), Macrod1(-0.27), Sirt4(-0.34), Ydjc(-0.55),
adiponectin-activated signaling pathway	0.0804503	0.364187	0.00325946	0.0216766	10	0.102533	0.187197	0.0482872	0.336152	0.0326678	Adipor2(0.04), Adipor2(0.04), Adipor2(0.04), Adipor1(0.01), Adipor1(0.01), Adipor1(0.01), Acsl1(-0.07), Slc27a1(-0.15), Csnk2b(-0.17), Adipoq(-1.32),
positive regulation of lipopolysaccharide-mediated signaling pathway	0.0597798	0.392625	0.00330412	0.0219288	11	0.20158	0.219479	0.0197289	0.37037	0.0190913	Traf6(0.11), Sash1(0.11), Prkca(-0.09), Ly86(-0.11), Ly86(-0.11), Ly86(-0.11), Ly96(-0.11), Ly96(-0.11), Ly96(-0.11), Bmp6(-0.24), Mif(-0.24),
DNA replication factor A complex	0.0823035	0.301121	0.00332127	0.0219639	15	0.0745822	0.109572	0.0467896	0.141181	0.259102	Purb(0.21), Ercc5(0.2), Pura(0.15), Cdc5l(-0.01), Helb(-0.07), Rpa1(-0.08), Smarcal1(-0.09), Bcas2(-0.1), Plrg1(-0.11), Plrg1(-0.11), Rpa2(-0.14), Xpa(-0.14), E2f6(-0.16), Prpf19(-0.22), Rpa3(-0.35),
regulation of G1/S transition of mitotic cell cycle	0.0878168	0.273251	0.00333646	0.0220231	15	0.0419486	0.047566	0.229803	0.167086	0.167724	Pdpn(0.32), Pid1(0.11), Ino80(0.08), Id2(0.07), Senp2(-0.02), Ccnd1(-0.05), Ptpn6(-0.06), Psme2(-0.06), Tjp3(-0.11), Psme1(-0.18), Ecd(-0.24), Psme3(-0.3), E2f1(-0.36), Hacd1(-0.56), Bid(-0.62),
SWI/SNF complex	0.0588394	0.278555	0.00342119	0.0225403	21	0.0534251	0.407851	0.159082	0.00369838	0.299789	Smarca2(0.37), Smarca2(0.37), Arid1a(0.31), Arid1a(0.31), Smarcc2(0.06), Smarcc2(0.06), Arid1b(0.06), Smarca4(-0.04), Smarca4(-0.04), Smarca4(-0.04), Smarcd1(-0.04), Smarcd3(-0.05), Smarce1(-0.08), Smarce1(-0.08), Smarcd2(-0.1), Smarcc1(-0.15), Smarcc1(-0.15), Smarcc1(-0.15), Actl6a(-0.18), Smarcb1(-0.21), Smarcb1(-0.21),
transcription factor TFIID complex	0.0894204	0.198831	0.0034362	0.0225971	29	0.31323	0.028869	0.185051	0.162595	0.0375802	Ercc1(0.29), Taf1(0.22), Taf1(0.22), Taf7(0.15), Taf7(0.15), Taf5(0.14), Taf8(0.12), Taf9b(0.11), Taf9b(0.11), Taf4(0.09), Ercc4(0.07), Taf3(0.06), Taf3(0.06), Tbp(0.02), Taf2(-0.02), Taf2(-0.02), Taf11(-0.09), Taf11(-0.09), Taf6(-0.16), Taf13(-0.19), Taf13(-0.19), Edf1(-0.22), Taf12(-0.22), Taf4b(-0.25), Taf10(-0.27), Taf10(-0.27), Taf9(-0.34), Taf9(-0.34), Trp53(-0.49),
transferase activity, transferring acyl groups	0.0347214	0.115062	0.00347334	0.0227568	145	0.479275	0.267108	0.00999892	0.0181422	0.173007	Cpt1b(0.79), Nat8l(0.72), Mboat1(0.56), Baat(0.54), Sptlc3(0.54), F13a1(0.52), Lcat(0.51), Zdhhc15(0.49), Crebbp(0.4), Soat2(0.39), Nat14(0.33), Ep300(0.33), Agpat4(0.32), Nat8f1(0.31), Qpct(0.31), Kmt2c(0.31), Kat6a(0.31), Lpgat1(0.28), Alas2(0.25), Ncoa3(0.24), Taf1(0.22), Dgat1(0.2), Atat1(0.2), Kat6b(0.19), Zdhhc20(0.19), Porcn(0.18), Ggt7(0.18), Lpcat2(0.18), Mboat2(0.17), Agpat9(0.16), Gm49…
ATPase binding	0.0925081	0.120662	0.00350885	0.022947	82	0.202768	0.0795218	0.124621	0.0553963	0.148812	Ank1(0.73), Drd1(0.69), Pgr(0.66), Dnajb1(0.56), Esr1(0.37), Pde4d(0.33), Atp6v1g3(0.32), Pkd2(0.3), Rab3a(0.22), Pik3r1(0.19), Cav1(0.16), Fxyd4(0.16), Abca1(0.14), Fxyd1(0.14), Aldob(0.12), Atp1b2(0.1), Atp6v0a1(0.09), Atp6v0a1(0.09), Rab6a(0.07), Tor1aip2(0.07), Ptpn3(0.07), Rac1(0.06), Ezr(0.06), Tcirg1(0.06), Actr3(0.06), Dnajc10(0.05), Dnajc10(0.05), Trpc6(0.04), Ube4b(0.04), Vimp(0.04), Np…
spliceosomal complex assembly	0.0978979	0.234509	0.00360082	0.0235	20	0.176199	0.0798204	0.0809088	0.211465	0.0704312	Sf3b1(0.29), Rbm5(0.23), Srpk2(0.22), Srpk2(0.22), Zrsr2(0.11), Scaf11(0.11), Sart3(0.07), Gcfc2(-0.05), Crnkl1(-0.07), Crnkl1(-0.07), Gemin2(-0.1), Ddx39b(-0.11), Sf3a2(-0.18), Prpf19(-0.22), Txnl4a(-0.23), Snrpd3(-0.23), Lsm4(-0.24), Txnl4b(-0.28), Snrpd1(-0.35), Gemin6(-0.79),
aminopeptidase activity	0.0750861	0.22814	0.00361969	0.0235413	31	0.225111	0.159823	0.0285748	0.0395509	0.275278	Lnpep(0.33), Lnpep(0.33), Tpp2(0.15), Enpep(0.14), Ctsl(0.13), 2010111I01Rik(0.13), 2010111I01Rik(0.13), Dpp8(0.07), Xpnpep1(0.01), Dpp4(0), Dpp9(0), Npepps(-0.04), Pepd(-0.06), Metap1(-0.08), Dpp7(-0.08), Blmh(-0.08), Blmh(-0.08), Metap2(-0.1), Rnpep(-0.1), Ctsh(-0.12), Ctsh(-0.12), Xpnpep3(-0.13), Lap3(-0.15), Lta4h(-0.16), Anpep(-0.17), Metap1d(-0.18), Dnpep(-0.21), Dpp3(-0.21), Erap1(-0.23), …
RNA helicase activity	0.106063	0.313758	0.00391961	0.0254451	11	0.130817	0.0645153	0.0896955	0.199489	0.131578	Ddx5(0.26), Rev1(0.07), Primpol(0.04), Skiv2l2(-0.06), Ispd(-0.07), Prim2(-0.12), Uap1l1(-0.22), Ddx21(-0.24), Prim1(-0.31), Ctu1(-0.35), Nudt5(-0.36),
heart contraction	0.0649322	0.373457	0.00404396	0.0262043	11	0.670485	0.137042	0.0714087	0.0315839	0.025821	Rps6ka2(0.24), Rnls(0.01), Dnm1l(0.01), Cdc42(-0.06), Sod1(-0.1), Sod1(-0.1), Ace(-0.21), Gpx1(-0.21), Gpx1(-0.21), Kcne1(-0.21), Atg5(-0.3),
cofactor binding	0.0735284	0.254884	0.00406547	0.0262955	18	0.18074	0.265128	0.308425	0.00886594	0.0659968	Pah(0.4), Sgk1(0.26), Hif1an(0.15), Phyh(0.04), Dao(-0.02), Dao(-0.02), Lmo2(-0.03), Pgam2(-0.08), Tyms(-0.13), Acly(-0.13), Ddo(-0.14), Ddo(-0.14), Suclg1(-0.19), Uros(-0.24), Tkt(-0.31), C3(-0.34), Hacl1(-0.42), Asns(-0.6),
site of double-strand break	0.0651462	0.220487	0.00415688	0.0267888	32	0.219793	0.23075	0.0159069	0.161144	0.104681	Rnf169(0.42), Fam178a(0.27), Phf1(0.21), Smc5(0.2), Rad18(0.17), Rnf8(0.13), Rfwd3(0.07), Oraov1(0.06), Atf2(0.04), Rnf168(0.02), Smarcad1(0.01), Smc6(0), Rad50(-0.02), Rad50(-0.02), Slf1(-0.04), Vcp(-0.04), Rnf138(-0.06), Nbn(-0.07), Helb(-0.07), Mre11a(-0.08), Smarcal1(-0.09), Aplf(-0.1), Rpa2(-0.14), Hus1(-0.17), BC029214(-0.18), Rad51(-0.21), Prpf19(-0.22), Parp3(-0.23), Parp3(-0.23), H2afx(-…
antigen processing and presentation	0.061495	0.215571	0.00430336	0.0276823	34	0.00624079	0.225534	0.0896533	0.553007	0.0787821	Rab3b(0.31), Rab8b(0.29), Flt3(0.26), Relb(0.18), Mr1(0.17), Azgp1(0.13), Ap3d1(0.1), Ctss(0.09), Rab5b(0.07), Rab6a(0.07), Rab27a(0.06), Cd1d1(0.04), Rab35(0.04), Ap3b1(0.03), Rab4a(0.03), H2-D1(0.01), H2-K1(-0.02), Rab10(-0.02), Hfe(-0.07), H2-DMa(-0.08), H2-DMa(-0.08), Cd74(-0.09), Cd74(-0.09), H2-Aa(-0.12), Rab34(-0.16), H2-Eb1(-0.19), Psmb8(-0.19), Unc93b1(-0.23), Rab32(-0.24), Psmb9(-0.25),…
telomere maintenance via telomerase	0.102487	0.277139	0.00434848	0.0278799	14	0.178356	0.0904224	0.10659	0.0711952	0.185328	Smg7(0.16), Smg6(0.12), Terf1(-0.01), Rad50(-0.02), Rad50(-0.02), Terf2(-0.02), Pot1a(-0.03), Smg5(-0.06), Tert(-0.11), Tert(-0.11), Atm(-0.13), Pinx1(-0.25), Nop10(-0.48), Dkc1(-0.64),
NADPH:sulfur oxidoreductase activity	0.0706306	0.208021	0.00434983	0.0278799	30	0.523144	0.268967	0.0441425	0.016916	0.0691501	Cybrd1(0.71), Heph(0.38), Gfod1(0.36), Mical2(0.27), Kdm1a(0.17), Fmo1(0.16), Aifm3(0.16), 4833439L19Rik(0.07), Phyhd1(0.02), Glyr1(0.01), Fa2h(0.01), Gfod2(-0.05), Vat1(-0.07), Pyroxd2(-0.07), Sccpdh(-0.11), Marc2(-0.14), Cryzl1(-0.15), Cbr4(-0.17), Enox2(-0.18), Enox1(-0.18), Cyb561a3(-0.19), Aifm2(-0.22), Kdm1b(-0.22), Zadh2(-0.22), Foxred1(-0.22), Frrs1(-0.24), BC026585(-0.24), Hsdl2(-0.34), …
mitochondrial membrane	0.067988	0.142312	0.00436507	0.027927	63	0.381797	0.115336	0.321569	0.030323	0.0214241	Nat8l(0.72), Nrgn(0.68), Sfxn3(0.4), Rnf144b(0.34), Rnf144b(0.34), Anxa1(0.33), Plcd1(0.3), Bcl2(0.24), Lrrk2(0.23), Acsl4(0.19), Bcl2l2(0.17), Gabbr1(0.14), Lyn(0.11), Ppox(0.1), Bcl2l1(0.06), Ivd(0.06), Dnm3(0.06), Dnm2(0.05), Ndufa1(0.04), Ikbke(0.03), Gper1(0.03), Ucp2(0.02), Dnm1(0.01), Atxn3(0.01), Bok(-0.01), Slc25a33(-0.02), Ndufa6(-0.04), Acadl(-0.05), Atp5b(-0.05), Haao(-0.08), Bnip3(-0…
positive regulation of extrinsic apoptotic signaling pathway	0.0976936	0.173004	0.00444976	0.0284174	37	0.0865888	0.0634947	0.0728736	0.296606	0.165462	Pml(0.32), Ptprc(0.31), Runx3(0.27), Fas(0.19), Bcl10(0.16), Bcl10(0.16), Cav1(0.16), Cyld(0.15), Cyld(0.15), Dedd2(0.13), Pak2(0.11), Ripk1(0.08), Ripk1(0.08), G0s2(0.03), G0s2(0.03), Gper1(0.03), Sfrp1(0.02), Pdia3(-0.03), Traf2(-0.06), Tnfrsf12a(-0.07), Itm2c(-0.08), Casp8(-0.13), Pycard(-0.18), Rbck1(-0.19), Ltbr(-0.21), Tnfsf10(-0.22), Tnfsf10(-0.22), Fadd(-0.25), Fadd(-0.25), Hyal2(-0.27), …
fatty acid biosynthetic process	0.0729247	0.145365	0.00451956	0.0288112	64	0.347676	0.224525	0.0359475	0.202006	0.019961	Ptgs2(1.16), Ch25h(0.76), Tbxas1(0.55), Hpgds(0.5), Ptgs1(0.31), H2-Ke6(0.27), Acacb(0.27), Prkab2(0.25), Ptges(0.21), Agmo(0.21), Lpl(0.2), Mgll(0.19), Acaca(0.18), Acaca(0.18), Scd1(0.17), Pecr(0.15), Prkab1(0.12), Fads2(0.08), Fasn(0.07), Fasn(0.07), Elovl6(0.07), Prkag3(0.07), Acsm3(0.05), Sc5d(0.04), Prkaa1(0.02), Fa2h(0.01), Elovl5(-0.01), Prkag1(-0.02), Acsl3(-0.02), Fads1(-0.05), Msmo1(-0…
glucosyltransferase activity	0.0754006	0.154371	0.00457086	0.0290858	51	0.0064171	0.0293641	0.15948	0.63802	0.209894	B3galt1(0.56), Galnt15(0.51), Galnt16(0.48), Wbscr17(0.22), B4galt1(0.18), Galnt12(0.17), B4galt3(0.15), B3gnt3(0.13), Fut9(0.11), B4galt4(0.11), B3gnt7(0.11), B4galt2(0.07), Dpy19l4(0.07), B3galt2(0.06), B3gnt9(0.06), Dpy19l3(0.05), Pigv(0.04), Galnt10(0.02), B4galt5(0.01), Uggt1(0.01), Dpy19l1(0), B3glct(0), Fut4(-0.01), Pigm(-0.02), Galnt14(-0.04), Glt8d1(-0.04), B3gnt2(-0.05), Fut11(-0.06), A…
response to reactive oxygen species	0.0619358	0.286165	0.00473782	0.0300941	16	0.549631	0.514419	0.0314075	0.00925215	0.0403824	Plk3(0.58), Apod(0.32), Apod(0.32), Hyal1(0.12), Sod2(0.02), Ptprn(-0.02), Aldh3a2(-0.07), Prkca(-0.09), Sod1(-0.1), Cat(-0.18), Gpx1(-0.21), Nme5(-0.22), Hyal2(-0.27), Prdx6(-0.3), Prdx1(-0.35), Gstp1(-0.65),
COPI vesicle coat	0.105507	0.29388	0.00482497	0.0305927	17	0.220257	0.160477	0.0494449	0.100957	0.136315	1190002N15Rik(0.31), 1190002N15Rik(0.31), Copb2(0.09), Copb2(0.09), Copa(0.06), Copa(0.06), Copg1(0.05), Copb1(-0.01), Copb1(-0.01), Arcn1(-0.01), Copz2(-0.05), Tmed3(-0.08), Scyl1(-0.08), Scyl1(-0.08), Cope(-0.11), Copz1(-0.14), Copg2(-0.16),
(R)-2-hydroxyglutarate dehydrogenase activity	0.0847242	0.237853	0.00503369	0.0318021	22	0.215762	0.21687	0.279081	0.0388151	0.0332557	Akr1c21(0.92), Rdh12(0.79), Kcnab1(0.53), Kcnab2(0.37), H2-Ke6(0.27), Bdh2(-0.01), Ctbp1(-0.06), Hsd3b7(-0.06), Idh1(-0.08), Aifm1(-0.08), Sdr42e1(-0.08), Rdh14(-0.08), Adh5(-0.09), Rdh13(-0.14), Cbr4(-0.17), D2hgdh(-0.18), D2hgdh(-0.18), Sdr39u1(-0.25), Akr1c13(-0.27), Wwox(-0.3), Htatip2(-0.4), Hsd11b2(-0.65),
positive regulation of TOR signaling	0.0851647	0.217042	0.00509693	0.0321443	27	0.0734934	0.0617902	0.285506	0.295485	0.0493999	Kdr(0.51), Reln(0.45), Rictor(0.31), Flcn(0.22), Slc38a9(0.11), Golph3(0.1), Rragc(0.01), Mios(0.01), Hdac3(-0.03), Wdr59(-0.03), Lamtor3(-0.05), Lamtor5(-0.05), Rptor(-0.07), Seh1l(-0.1), Lamtor2(-0.11), Lamtor4(-0.12), Rragd(-0.13), Rheb(-0.15), Rheb(-0.15), Rragb(-0.16), Rragb(-0.16), Rraga(-0.17), Mlst8(-0.18), Lamtor1(-0.18), Sec13(-0.18), Wdr24(-0.26), Gas6(-0.35),
positive regulation of telomere maintenance via telomerase	0.100652	0.19154	0.00513092	0.0323011	29	0.0792924	0.147633	0.113839	0.0630476	0.292126	Prkcq(0.46), Mapk15(0.4), Pkib(0.39), Mapkapk5(0.35), Tnks(0.23), Hmbox1(0.21), Map3k4(0.04), Ctnnb1(0.03), Mapk1(-0.01), Map2k7(-0.02), Nek7(-0.02), Pot1a(-0.03), Atr(-0.06), Nek2(-0.07), Obfc1(-0.07), Mapk3(-0.08), Wrap53(-0.1), Atm(-0.13), Acd(-0.16), Tcp1(-0.17), Cct4(-0.21), Cct8(-0.21), Pnkp(-0.22), Cct7(-0.25), Cct2(-0.27), Cct3(-0.4), Cct5(-0.43), Aurkb(-0.6), Dkc1(-0.64),
NLS-bearing protein import into nucleus	0.0779927	0.281551	0.00535008	0.0335613	18	0.364716	0.178083	0.00818229	0.186743	0.125487	Ranbp2(0.23), Tnpo1(0.13), Kpna4(0.11), Dag1(0.1), Nup35(0.06), Nup54(0.02), Ranbp6(0), Kpna1(-0.04), Kpna1(-0.04), Vhl(-0.04), Tnpo2(-0.09), Kpnb1(-0.12), Kpna6(-0.12), Kpna3(-0.17), Kpna2(-0.21), Kpna2(-0.21), Ipo5(-0.21), Ipo4(-0.47),
deoxyribonuclease activity	0.0878895	0.342565	0.00536279	0.0335815	10	0.19955	0.0339087	0.167913	0.472624	0.0224925	Dnase1(0.35), Tatdn2(0.15), Dffb(-0.03), Dffb(-0.03), Dnase1l1(-0.14), Dnase1l2(-0.16), Dnase1l3(-0.23), Tatdn1(-0.28), Endog(-0.32), Nme1(-0.34),
organic anion transmembrane transporter activity	0.0143273	0.364985	0.00540594	0.0337919	24	0.950832	0.707627	0.0201354	6.96405e-05	0.0207673	Slco4a1(0.58), Slco4c1(0.24), Slco2b1(0.18), Slc22a23(0.16), Abcc5(0.08), Slco1a1(0.03), Slc22a17(-0.03), Slco1a4(-0.05), Slco1a4(-0.05), Slc22a8(-0.06), Slc22a18(-0.08), Slc22a7(-0.08), Slc22a7(-0.08), Slc22a7(-0.08), Slco3a1(-0.16), Mfsd10(-0.19), Slc22a6(-0.21), Slc22a6(-0.21), Slc22a6(-0.21), Slc22a6(-0.21), Slc22a6(-0.21), Slc17a3(-0.25), Slc22a19(-0.28), Slc22a19(-0.28),
DNA-dependent ATPase activity	0.0918431	0.199883	0.00545324	0.0339676	30	0.148308	0.138638	0.244811	0.058029	0.0968538	Xrcc3(0.41), Bptf(0.37), Smarca1(0.33), Chd6(0.32), Ercc6(0.23), Chd8(0.14), Dhx36(0.09), Xrcc2(-0.01), Rbbp4(-0.02), Gtf2h2(-0.02), Ercc2(-0.04), Smarca4(-0.04), Ighmbp2(-0.07), Rad51d(-0.08), Rad51d(-0.08), Smarcal1(-0.09), Smarcal1(-0.09), Rad51c(-0.09), Ercc3(-0.11), Gtf2h1(-0.12), Gtf2h1(-0.12), Ddx11(-0.18), Mnat1(-0.19), Ccnh(-0.2), Rad51(-0.21), Cdk7(-0.23), Top2a(-0.29), Gtf2h3(-0.31), G…
amino acid binding	0.0701888	0.246856	0.00561071	0.034887	22	0.748331	0.165073	0.176832	0.00433132	0.0349245	Hdc(0.84), Pah(0.4), Mtr(0.28), Slc1a3(0.07), Ass1(0.05), Gfpt1(0.02), Ddah2(-0.03), Ddc(-0.05), Prodh(-0.05), Got2(-0.11), Gchfr(-0.12), Aars(-0.13), Aars(-0.13), Ddah1(-0.14), Dpys(-0.18), Dpys(-0.18), Aars2(-0.22), Shmt1(-0.24), Shmt2(-0.24), Kars(-0.3), Mat2a(-0.4), Cad(-0.54),
cellular response to interferon-gamma	0.0937152	0.225332	0.00566129	0.0351253	34	0.0586153	0.101777	0.167022	0.269015	0.106891	Acod1(1.12), Ccl11(0.83), Ccl6(0.82), Ccl7(0.56), Ccl20(0.55), Mrc1(0.51), Nos2(0.45), Ccl2(0.27), Gbp2(0.19), Ccl4(0.18), Gbp5(0.16), Aqp4(0.08), Syncrip(0.08), Dapk1(0.05), Dapk1(0.05), Ccl9(0.03), Slc26a6(-0.08), Eprs(-0.1), Eprs(-0.1), Dapk3(-0.13), Dapk3(-0.13), Ccl25(-0.14), Cx3cl1(-0.14), Gbp3(-0.14), Gbp7(-0.17), H2-Q7(-0.25), Gapdh(-0.29), Gbp9(-0.3), Gbp4(-0.31), Ccl5(-0.34), Rpl13a(-0.…
nuclear localization sequence binding	0.089152	0.242668	0.0056689	0.0351253	27	0.49031	0.0908292	0.043494	0.113409	0.0834992	Nfkbia(0.33), Nup98(0.24), Nup98(0.24), Lbr(0.16), Tnpo1(0.13), Pom121(0.12), Kpna4(0.11), Nup153(0.04), Nup153(0.04), Nup214(0.03), Nup214(0.03), Brap(0.01), Ranbp6(0), Tnpo3(-0.02), Kpna1(-0.04), Kpna1(-0.04), Tnpo2(-0.09), Kpnb1(-0.12), Kpna6(-0.12), Nupl1(-0.12), Nupl1(-0.12), Ipo13(-0.15), Kpna3(-0.17), Kpna2(-0.21), Kpna2(-0.21), Ipo5(-0.21), Ipo4(-0.47),
ribonucleoprotein complex binding	0.103526	0.174866	0.00612298	0.0378726	34	0.204461	0.0823804	0.118189	0.151581	0.120497	Rnasel(0.8), Ckap5(0.21), Smg7(0.16), Uhmk1(0.15), Secisbp2l(0.15), Hnrnpu(0.14), Ezh2(0.12), Top2b(0.12), Smg6(0.12), Smg6(0.12), Ybx2(0.08), Prpf6(0.06), Secisbp2(0.05), Itch(0.04), Apobec1(0.02), Hnrnpk(0.01), Cd2bp2(0.01), Smg5(-0.06), Hnrnpc(-0.1), Ifih1(-0.12), Ppp1ca(-0.13), Pqbp1(-0.13), Phf6(-0.13), Eif4a3(-0.14), Rnf135(-0.2), Prpf31(-0.24), Ppih(-0.26), Eefsec(-0.27), Rpl35a(-0.29), Ti…
protein monoubiquitination	0.0922317	0.203553	0.00613751	0.0378962	33	0.25936	0.117825	0.0914441	0.063245	0.181894	Neurl1a(0.25), Topors(0.19), Rad18(0.17), Huwe1(0.17), Mgrn1(0.14), Cul3(0.14), Ube4b(0.04), Klhl12(0.04), Klhl12(0.04), Nedd4l(0.03), Tsg101(0.02), Cul1(0.01), Ube2w(0.01), Ube2w(0.01), Ube2w(0.01), Ube2d3(0), Ube2r2(0), Ube2b(-0.01), Park2(-0.02), Ube2o(-0.03), Trim25(-0.04), Fbxl2(-0.09), Fbxl2(-0.09), Trim21(-0.12), Nedd4(-0.14), Rbx1(-0.15), Klhl22(-0.21), Klhl22(-0.21), Ube2t(-0.24), Pex12(…
protein K63-linked ubiquitination	0.0665152	0.203697	0.00628079	0.0387133	37	0.361709	0.362794	0.028765	0.10811	0.0408991	Hectd1(0.43), Hectd1(0.43), Trim56(0.29), Bfar(0.19), Rnf8(0.13), Arih2(0.12), Peli3(0.12), Traf6(0.11), Traf6(0.11), Wwp2(0.1), Itch(0.04), Rnf152(0.03), Rnf168(0.02), Ube2v2(0.02), Ube2b(-0.01), Ube2e3(-0.02), Park2(-0.02), Zfp91(-0.03), Ube2o(-0.03), Rnf5(-0.04), Rnf115(-0.04), Traf2(-0.06), Ube2e2(-0.06), Ube2n(-0.07), Ube2n(-0.07), Ube2f(-0.09), Stub1(-0.12), Ube2g1(-0.12), Nedd4(-0.14), Rnf…
palmitoyltransferase activity	0.083236	0.162569	0.00636329	0.0391536	54	0.0715652	0.191896	0.0656294	0.150772	0.24405	Mboat1(0.56), Zdhhc15(0.49), Zdhhc15(0.49), Nat14(0.33), Nat8f1(0.31), Lpgat1(0.28), Zdhhc20(0.19), Porcn(0.18), Mboat2(0.17), Zdhhc14(0.12), Zdhhc18(0.09), Zdhhc18(0.09), Zdhhc8(0.07), Zdhhc8(0.07), Hhat(0.05), Zdhhc17(0.05), Zdhhc17(0.05), Nat8(0.04), Zdhhc21(0.03), Zdhhc21(0.03), Esco1(0.02), Mboat7(0.01), Pla2g15(0.01), Zdhhc1(0), Zdhhc1(0), Zdhhc13(0), Ykt6(-0.01), Lpcat3(-0.03), Nat6(-0.06)…
spliceosomal tri-snRNP complex assembly	0.10828	0.308596	0.00676059	0.041526	12	0.393451	0.100351	0.126207	0.0474946	0.123338	Prpf8(0.13), Prpf8(0.13), Usp4(0.1), Prpf3(0.08), Sart3(0.07), Prpf6(0.06), Prpf6(0.06), Aar2(-0.11), Prpf19(-0.22), Prpf31(-0.24), Prpf31(-0.24), Lsm2(-0.38),
coenzyme F390-A hydrolase activity	0.102809	0.20017	0.00702262	0.042912	28	0.251272	0.38814	0.0401235	0.126228	0.0501194	Ndst2(0.26), Mest(0.25), Dcp1a(0.21), Ndst1(0.18), Lactb2(0.14), Dcp1b(0.03), Abhd14b(0), Abhd17b(0), Aptx(-0.02), Dffb(-0.03), Abhd14a(-0.03), Pnkd(-0.04), Hint2(-0.05), Nudt13(-0.06), Abhd13(-0.06), Abhd17c(-0.06), Abhd4(-0.08), Abhd16a(-0.13), Pigk(-0.14), Hint3(-0.15), Rbbp9(-0.16), Fahd2a(-0.17), Mblac2(-0.17), Abhd8(-0.24), Hint1(-0.27), Abhd17a(-0.28), Abhd11(-0.32), Mblac1(-0.52),
coenzyme F390-G hydrolase activity	0.102809	0.20017	0.00702262	0.042912	28	0.251272	0.38814	0.0401235	0.126228	0.0501194	Ndst2(0.26), Mest(0.25), Dcp1a(0.21), Ndst1(0.18), Lactb2(0.14), Dcp1b(0.03), Abhd14b(0), Abhd17b(0), Aptx(-0.02), Dffb(-0.03), Abhd14a(-0.03), Pnkd(-0.04), Hint2(-0.05), Nudt13(-0.06), Abhd13(-0.06), Abhd17c(-0.06), Abhd4(-0.08), Abhd16a(-0.13), Pigk(-0.14), Hint3(-0.15), Rbbp9(-0.16), Fahd2a(-0.17), Mblac2(-0.17), Abhd8(-0.24), Hint1(-0.27), Abhd17a(-0.28), Abhd11(-0.32), Mblac1(-0.52),
BBSome	0.070251	0.358632	0.0070429	0.0429617	16	0.0393898	0.161014	0.0705252	0.139437	0.425892	Bbs1(0.12), Bbs1(0.12), Bbs4(0.1), Bbs4(0.1), Bbs2(0.06), Bbs2(0.06), Bbs9(0), Bbs9(0), Bbip1(-0.1), Bbip1(-0.1), Bbs5(-0.11), Bbs5(-0.11), Ttc8(-0.15), Ttc8(-0.15), Bbs7(-0.17), Bbs7(-0.17),
DNA damage response, signal transduction by p53 class mediator	0.0852425	0.266614	0.0072079	0.0438925	15	0.359283	0.271564	0.0520257	0.0977421	0.0567625	E2f7(0.85), Batf(0.44), Atrx(0.29), Myo6(0.19), Foxo3(0.1), Sesn2(0.05), Sesn2(0.05), Bcl3(0.04), Usp10(-0.23), Usp10(-0.23), Mif(-0.24), Triap1(-0.29), Trp53(-0.49), Trp53(-0.49), Trp53(-0.49),
mannosyltransferase activity	0.1022	0.142421	0.00725793	0.044047	53	0.0184525	0.0708972	0.159729	0.45491	0.211656	B3galt1(0.56), Galnt15(0.51), Galnt16(0.48), Wbscr17(0.22), B4galt1(0.18), Galnt12(0.17), B4galt3(0.15), B3gnt3(0.13), Fut9(0.11), B4galt4(0.11), B3gnt7(0.11), B4galt2(0.07), Dpy19l4(0.07), B3galt2(0.06), B3gnt9(0.06), Dpy19l3(0.05), Pigv(0.04), Pigv(0.04), Galnt10(0.02), B4galt5(0.01), Uggt1(0.01), Dpy19l1(0), B3glct(0), Fut4(-0.01), Pigm(-0.02), Galnt14(-0.04), Glt8d1(-0.04), B3gnt2(-0.05), Fut…
positive regulation of protein targeting to mitochondrion	0.124925	0.124549	0.00725817	0.044047	66	0.258817	0.142136	0.124797	0.0623057	0.144425	Hspa1l(0.44), Fzd5(0.43), Rhou(0.37), Plagl2(0.28), Kcnn3(0.27), Ugcg(0.23), Rac2(0.22), Leprot(0.19), Fbxw7(0.17), Huwe1(0.17), Srebf2(0.16), Zbtb17(0.13), Ablim3(0.13), Hes1(0.12), Arih2(0.12), Rnf31(0.12), Mis18a(0.09), Ctsk(0.08), Atg13(0.08), Nkap(0.08), Polr3a(0.08), Zdhhc8(0.07), Pink1(0.06), Snip1(0.06), Vps11(0.05), Hnmt(0.05), Hhat(0.05), Slc17a9(0.05), Micall2(0.05), Wbp11(0.03), Usp36…
intraciliary transport particle A	0.108639	0.311455	0.00730673	0.0442658	13	0.0529913	0.245029	0.122618	0.118564	0.209215	Ift122(0.08), Ift122(0.08), Tulp3(0.03), Ift43(0.02), Ift43(0.02), Wdr19(0), Wdr19(0), Ift140(-0.01), Ift140(-0.01), Ttc21b(-0.08), Ttc21b(-0.08), Wdr35(-0.12), Wdr35(-0.12),
RNA splicing, via transesterification reactions	0.118245	0.338999	0.00741618	0.044852	10	0.220712	0.169856	0.0700299	0.136091	0.12509	Srrm1(0.12), Scaf11(0.11), Slu7(0.07), Ddx23(0), Dbr1(-0.11), Srsf10(-0.12), Srsf10(-0.12), Rbm17(-0.12), Wdr83(-0.13), Sf3a2(-0.18),
methionine biosynthetic process	0.106314	0.309951	0.00748012	0.0451615	12	0.354642	0.124842	0.153609	0.0262783	0.169144	Bhmt2(0.35), Mtr(0.28), Mtr(0.28), Mthfd2l(0.04), Mthfr(-0.07), Mthfd1(-0.07), Apip(-0.15), Enoph1(-0.29), Adi1(-0.33), Mtrr(-0.46), Mtrr(-0.46), Mri1(-0.5),
ubiquitin protein ligase activity involved in ERAD pathway	0.106337	0.341182	0.00752646	0.0453639	10	0.432628	0.280822	0.0619622	0.025482	0.115901	Rnf185(0.06), Rnf185(0.06), Syvn1(0.02), Syvn1(0.02), Amfr(-0.04), Rnf5(-0.04), Trim25(-0.04), Stub1(-0.12), Tmem129(-0.14), Fbxo6(-0.32),
vacuolar transport	0.113824	0.277922	0.00770221	0.0463442	15	0.358433	0.101598	0.101535	0.111432	0.098449	Chmp4c(0.3), Atp6v0d2(0.14), Cln3(0.07), Chmp4b(0.07), Ndfip1(0), Chmp2a(-0.01), Chmp3(-0.04), Chmp7(-0.05), Chmp5(-0.08), Ndfip2(-0.1), Atp6v0d1(-0.11), 2610002M06Rik(-0.12), Chmp1a(-0.12), Chmp2b(-0.14), Chmp6(-0.29),
negative regulation of proteasomal ubiquitin-dependent protein catabolic process	0.122936	0.237339	0.00772584	0.0464075	18	0.221191	0.178995	0.0615261	0.167443	0.111022	Tlk2(0.19), Senp1(0.1), Wac(0.1), Sdcbp(0.06), Bag6(0.06), Bag5(0.02), N4bp1(0.02), Ccar2(0.02), Mtm1(-0.05), Hfe(-0.07), Clec16a(-0.12), Smarcc1(-0.15), Smarcc1(-0.15), Fhit(-0.16), Gipc1(-0.17), Ubxn1(-0.18), Park7(-0.2), Taf9(-0.34),
transcription initiation from RNA polymerase II promoter	0.11294	0.186521	0.00781685	0.0468746	31	0.199171	0.189181	0.0392454	0.142016	0.197926	Med13(0.53), Tcf4(0.35), Med12(0.23), Taf7(0.15), Gtf2a1(0.14), Taf5(0.14), Med14(0.1), Taf4(0.09), Thrap3(0.08), Med26(0.07), Med1(0.05), Med16(0.04), Taf2(-0.02), Gtf2e2(-0.03), Med17(-0.04), Gtf2a2(-0.05), Med24(-0.07), Med4(-0.09), Taf11(-0.09), Gtf2f1(-0.09), Ercc3(-0.11), Maz(-0.15), Polr2d(-0.15), Taf6(-0.16), Polr2g(-0.18), Taf12(-0.22), Gtf2f2(-0.22), Polr2i(-0.25), Taf10(-0.27), Gtf2e1(…
cellular copper ion homeostasis	0.107586	0.255229	0.00792283	0.0474297	18	0.103523	0.365529	0.189694	0.169923	0.0252644	Atp7a(0.17), Atp7a(0.17), Atp7a(0.17), Aplp2(0.13), App(0.06), App(0.06), Slc11a2(0.03), Arf1(-0.04), Slc31a1(-0.07), Slc31a1(-0.07), Prnp(-0.1), Slc31a2(-0.11), Slc31a2(-0.11), Sco1(-0.18), Commd1(-0.2), Atox1(-0.23), Atox1(-0.23), Atp7b(-0.44),
carboxylic ester hydrolase activity	0.0200726	0.226557	0.00801096	0.0478763	46	0.870751	0.793554	0.103253	0.000372421	0.00348369	Liph(0.71), Baat(0.54), Acot5(0.35), Lpl(0.2), Acot10(0.2), Pla1a(0.2), Mgll(0.19), Fam135a(0.19), Lipg(0.11), Acot11(0.07), Ppme1(0.05), Lypla1(0.03), Abhd2(0.02), Ces2g(0.02), Pnpla7(-0.01), Acot9(-0.02), Abhd5(-0.03), Nlgn2(-0.03), Ces1e(-0.04), Ces1d(-0.05), Ces1d(-0.05), Ces1d(-0.05), Pnpla6(-0.08), Abhd4(-0.08), Lyplal1(-0.09), Lypla2(-0.12), Ache(-0.13), Abhd3(-0.13), Acot3(-0.14), Acot2(-…
thiolester hydrolase activity	0.0368819	0.343307	0.00826383	0.0492213	14	0.810629	0.342677	0.070545	0.00169378	0.0759174	Baat(0.54), Acot5(0.35), Ppt2(0), Aldh6a1(-0.06), Acot3(-0.14), Ufsp2(-0.14), Ufsp2(-0.14), Acot2(-0.15), Acot4(-0.15), Ufsp1(-0.17), Acot6(-0.36), Acnat2(-0.46), Acnat1(-0.5), Acot1(-0.57),
alpha-1,3-mannosyltransferase activity	0.0965189	0.149837	0.00838098	0.0497969	50	0.0105915	0.0634858	0.183491	0.579659	0.207124	B3galt1(0.56), Galnt15(0.51), Galnt16(0.48), Wbscr17(0.22), B4galt1(0.18), Galnt12(0.17), B4galt3(0.15), B3gnt3(0.13), Fut9(0.11), B4galt4(0.11), B3gnt7(0.11), B4galt2(0.07), Dpy19l4(0.07), B3galt2(0.06), B3gnt9(0.06), Dpy19l3(0.05), Pigv(0.04), Galnt10(0.02), B4galt5(0.01), Uggt1(0.01), Dpy19l1(0), B3glct(0), Fut4(-0.01), Pigm(-0.02), Galnt14(-0.04), Glt8d1(-0.04), B3gnt2(-0.05), Fut11(-0.06), A…
alternative mRNA splicing, via spliceosome	0.106754	0.286053	0.00838863	0.0497969	17	0.138305	0.0418563	0.242997	0.30801	0.0914339	Cdk13(0.21), Esrp1(0.19), Sfswap(0.17), Sfpq(0.13), Sfpq(0.13), Hnrnpm(0.09), Slu7(0.07), Mbnl1(-0.03), Mbnl1(-0.03), Esrp2(-0.08), Rbm17(-0.12), Srsf1(-0.12), Pqbp1(-0.13), Pqbp1(-0.13), Hnrnpa1(-0.14), Rsrc1(-0.14), Srsf6(-0.17),
1-acylglycerol-3-phosphate O-acyltransferase activity	0.120118	0.311123	0.00843243	0.0498949	11	0.318928	0.329088	0.0462106	0.0552004	0.124843	Agpat4(0.32), Lpcat2(0.18), Agpat9(0.16), Abhd5(-0.03), Agpat3(-0.07), Lclat1(-0.09), Agpat1(-0.19), Agpat1(-0.19), Agpat5(-0.25), Agpat2(-0.26), Agpat2(-0.26),
cellular response to ionizing radiation	0.110352	0.185349	0.00843334	0.0498949	30	0.132031	0.196276	0.0326006	0.250668	0.19622	Gadd45a(0.55), Sirt1(0.4), Snai2(0.27), Spidr(0.16), Cdkn1a(0.15), Blm(0.12), Tank(0.12), Ino80(0.08), Grb2(0.03), Mapk14(0), Rad9a(-0.01), Rad9a(-0.01), Net1(-0.01), Clock(-0.02), Fbxo4(-0.03), Rhob(-0.04), Rad9b(-0.06), Ints7(-0.08), Swi5(-0.1), Swi5(-0.1), Rhno1(-0.15), Hus1(-0.17), Bbc3(-0.2), Rad51(-0.21), Ect2(-0.24), Eef1d(-0.29), Rad1(-0.37), Trp53(-0.49), Trp53(-0.49), Fignl1(-0.54),
porphyrin-containing compound biosynthetic process	0.111766	0.285099	0.00847882	0.0500803	13	0.225266	0.308667	0.142517	0.0263348	0.140509	Ank1(0.73), Sptb(0.32), Ppox(0.1), Slc11a2(0.03), Cpox(-0.01), Alad(-0.09), Fech(-0.16), Urod(-0.23), Uros(-0.24), Uros(-0.24), Abcb6(-0.3), Rsad1(-0.31), Hmbs(-0.42),
chaperone-mediated protein folding	0.0638031	0.216256	0.00855489	0.0504453	29	0.114277	0.13608	0.0992432	0.113583	0.296053	Ttc9(0.58), Unc45b(0.37), Clu(0.29), Hspa8(0.24), Fkbp5(0.15), Fkbp5(0.15), Fkbp10(0.15), Fkbp14(0.13), Unc45a(0.11), Fkbp7(0.07), Fkbp1b(0.05), Dnajb6(0.05), Fkbpl(-0.04), Canx(-0.05), Chordc1(-0.05), Ppid(-0.08), Calr(-0.1), Ttc9c(-0.1), Pex19(-0.14), Tor1a(-0.14), Fkbp2(-0.15), Fkbp8(-0.19), Fkbp9(-0.19), Pdia4(-0.2), Fkbp1a(-0.22), Fkbp3(-0.27), Fkbp4(-0.29), Fkbp4(-0.29), Fkbp11(-0.53),
membrane coat	0.132687	0.19827	0.00880693	0.0516732	27	0.228256	0.0959518	0.113184	0.116609	0.195954	Ap3b2(0.28), Ap1s2(0.23), Cltc(0.22), Synj1(0.18), Ap1g1(0.1), Ap3d1(0.1), Copb2(0.09), Ap4e1(0.09), Chmp4b(0.07), Copa(0.06), Copg1(0.05), Ap2b1(0.05), Ap3b1(0.03), Ap1s3(0.02), Ap1b1(0.01), Dnm1(0.01), Chmp2a(-0.01), Copb1(-0.01), Ap2a1(-0.02), Ap2a2(-0.03), Ap2s1(-0.11), Copz1(-0.14), Ap1s1(-0.16), Copg2(-0.16), Ap3s1(-0.19), Ap3s2(-0.23), Ap1g2(-0.31),
prenyltransferase activity	0.116569	0.30317	0.00888559	0.0520483	11	0.308149	0.101768	0.108301	0.087145	0.175291	Ggps1(0.11), Pggt1b(0.11), Nus1(0.03), Nus1(0.03), Rabggtb(-0.03), Fnta(-0.14), Ubiad1(-0.19), Rabggta(-0.26), Fntb(-0.26), Cox10(-0.27), Coq2(-0.33),
oxidoreductase activity, acting on the CH-CH group of donors	0.0399653	0.277653	0.00906469	0.0530097	25	0.670236	0.524716	0.0515754	0.000468156	0.198346	Acox3(0.19), Lbr(0.16), Acad10(0.15), Acadsb(0.1), Sdha(0.09), Dpyd(0.09), Ivd(0.06), Srd5a1(0.01), Acadl(-0.05), Tm7sf2(-0.05), Gcdh(-0.06), Acadvl(-0.08), Acad11(-0.09), Cox15(-0.1), Acadm(-0.13), Srd5a3(-0.13), Sdhc(-0.15), Tecr(-0.15), Dhodh(-0.16), Acad8(-0.18), Srd5a2(-0.18), Acad9(-0.19), Acox1(-0.2), Acox2(-0.21), Acads(-0.24),
succinate metabolic process	0.102753	0.382586	0.00913987	0.0533612	11	0.467057	0.334826	0.079714	0.0381909	0.056083	Stat5a(0.1), Sdha(0.09), Stat5b(0.07), Sucla2(-0.03), Aldh5a1(-0.07), Aldh5a1(-0.07), Ghr(-0.09), Suclg2(-0.13), Sdhb(-0.14), Suclg1(-0.19), Suclg1(-0.19),
removal of superoxide radicals	0.0858497	0.340207	0.0091713	0.0534564	14	0.594406	0.39353	0.224123	0.0139551	0.0111293	Nos3(0.51), Atp7a(0.17), Sod2(0.02), Sod2(0.02), Ccs(0), Sod1(-0.1), Sod1(-0.1), Sod1(-0.1), Sod1(-0.1), Fancc(-0.2), Prdx2(-0.2), Prdx2(-0.2), Apoa4(-0.26), Prdx1(-0.35),
fibrinolysis	0.0919947	0.364881	0.00933318	0.0543105	10	0.122048	0.343832	0.0958793	0.0598372	0.202946	Pros1(0.39), Fgg(0.05), Fgb(0.03), Serping1(0.01), Anxa2(0.01), Plau(-0.1), Fga(-0.12), Hrg(-0.2), Cpb2(-1.56), Cpb2(-1.56),
proteasome binding	0.1227	0.313765	0.00942716	0.0547673	10	0.356308	0.112701	0.0297437	0.19024	0.181686	Id1(0.32), Usp13(0.22), Bag6(0.06), Adrm1(-0.13), Uchl5(-0.14), Psmf1(-0.18), Usp14(-0.23), Psmb9(-0.25), Psmd14(-0.28), Psmg1(-0.4),
RNA polymerase II carboxy-terminal domain kinase activity	0.115143	0.219729	0.00971124	0.0563252	22	0.46232	0.274996	0.0874199	0.0659828	0.0473772	Brd4(0.33), Brd4(0.33), Cdk12(0.33), Cdk13(0.21), Cdk9(0.04), Cdk9(0.04), Ccnk(0.02), Mapk1(-0.01), Gtf2h2(-0.02), Ercc2(-0.04), Cdk8(-0.07), Ercc3(-0.11), Gtf2h1(-0.12), Gtf2h1(-0.12), Mnat1(-0.19), Ccnh(-0.2), Cdk7(-0.23), Gtf2h3(-0.31), Gtf2h3(-0.31), Gtf2h4(-0.32), Gtf2h4(-0.32), Cdk1(-0.54),
cellular iron ion homeostasis	0.121412	0.183433	0.00999088	0.0578523	36	0.41714	0.199689	0.0297036	0.127537	0.129785	Trf(0.61), Fam132b(0.4), Heph(0.38), Hif1a(0.34), Slc11a1(0.31), Slc11a1(0.31), Alas2(0.25), Hmox1(0.21), Scara5(0.09), Smad4(0.05), Cp(0.04), Ireb2(0.03), Ireb2(0.03), Ireb2(0.03), Slc40a1(0), Ndfip1(0), Ttc7(0), Aco1(-0.04), Aco1(-0.04), Aco1(-0.04), Iscu(-0.05), Atp13a2(-0.05), Mon1a(-0.06), Hfe(-0.07), Abcb7(-0.1), Sod1(-0.1), Ncoa4(-0.1), Egln1(-0.11), Fxn(-0.22), Fxn(-0.22), Bmp6(-0.24), Ft…
negative regulation of fatty acid biosynthetic process	0.109632	0.310447	0.0100092	0.0578634	11	0.376505	0.338688	0.143081	0.0453219	0.0434674	Insig1(0.16), Erlin1(0.13), Insig2(0.02), Acadl(-0.05), Acadvl(-0.08), Wdtc1(-0.09), Wdtc1(-0.09), Trib3(-0.18), Erlin2(-0.24), Brca1(-0.77), Brca1(-0.77),
ESCRT I complex	0.108486	0.307531	0.0100501	0.058005	12	0.570222	0.123357	0.0554661	0.0557156	0.151401	Ubap1(0.06), Ubap1(0.06), Vps37c(0.05), Vps37b(0.05), Tsg101(0.02), Tsg101(0.02), Vps37a(0), Vps37d(-0.06), Mvb12b(-0.09), Vps28(-0.14), Vps28(-0.14), Mvb12a(-0.27),
DNA biosynthetic process	0.113447	0.229221	0.0101034	0.0582179	19	0.262311	0.0993918	0.011621	0.192521	0.446742	Ctgf(0.35), Tk1(0.24), Papd7(0.09), Rev1(0.07), Tk2(0.02), Lig4(-0.03), Lig3(-0.06), Pam16(-0.06), Polh(-0.08), Pole(-0.09), Polk(-0.1), Tert(-0.11), Lin9(-0.15), Polb(-0.19), Lig1(-0.27), Pold1(-0.27), Poli(-0.29), Poll(-0.42), Phb(-0.48),
protein autoubiquitination	0.0998163	0.174225	0.0101507	0.0583955	51	0.291911	0.208675	0.0447676	0.124797	0.163228	Asb4(0.61), Hectd1(0.43), Rnf146(0.22), Bfar(0.19), Cnot4(0.17), Rad18(0.17), Jade2(0.16), Trim68(0.15), Rnf8(0.13), Traf6(0.11), Traf6(0.11), Wwp2(0.1), Uhrf2(0.1), Uhrf2(0.1), Rnf41(0.09), Ube3a(0.06), Rnf185(0.06), Ube4b(0.04), Trim13(0.04), Trim30a(0.03), Ltn1(0.03), Ube2d3(0), Ube2b(-0.01), Park2(-0.02), Rnf141(-0.02), Rnf141(-0.02), Ube2a(-0.03), Amfr(-0.04), Rnf115(-0.04), Rnf213(-0.05), T…
condensed nuclear chromosome	0.0931425	0.178478	0.0102081	0.05863	36	0.0687332	0.170782	0.130735	0.139515	0.293641	Sycp1(1.01), Ttn(0.57), Sycp3(0.52), Dnmt3l(0.43), Brd4(0.33), Brd4(0.33), Sun2(0.31), Sun2(0.31), Ago3(0.24), Add3(0.08), Rsph1(0.07), Rad21(0.03), Rad50(-0.02), Rad50(-0.02), Chek1(-0.05), Lig3(-0.06), Nek2(-0.07), Topbp1(-0.07), Kifap3(-0.08), Mre11a(-0.08), Rpa1(-0.08), Rad51c(-0.09), Chmp1a(-0.12), Hmg20b(-0.13), Mlh1(-0.18), Rad51(-0.21), Tubg1(-0.25), Lrpprc(-0.26), H2afx(-0.28), Nol6(-0.2…
activation of cysteine-type endopeptidase activity	0.137028	0.299005	0.0105271	0.0603647	11	0.232555	0.193336	0.0404313	0.108167	0.280801	Tbc1d10a(0.16), Cyfip2(0.05), Pawr(-0.04), Cideb(-0.08), Asph(-0.08), Casp8(-0.13), Perp(-0.13), Bad(-0.16), Bak1(-0.18), Pycard(-0.18), Fadd(-0.25),
positive regulation of interleukin-6 secretion	0.103421	0.259273	0.0108707	0.0622338	15	0.090832	0.0640947	0.238091	0.188539	0.248641	Il1b(0.69), Twist1(0.57), F2rl1(0.23), Il1rap(0.2), F2r(0.17), Selk(-0.04), Hspd1(-0.14), Trpv4(-0.16), Pycard(-0.18), Unc93b1(-0.23), Lgals9(-0.24), Hyal2(-0.27), Hyal2(-0.27), Ncl(-0.27), Il17rc(-0.32),
malate metabolic process	0.11017	0.362934	0.0110998	0.063389	10	0.456055	0.287599	0.11469	0.0695916	0.0390215	Me2(0.21), Me3(0.05), Mdh1(0.01), Mdh1(0.01), Fh1(-0.07), Fh1(-0.07), Mdh2(-0.09), Mdh2(-0.09), Me1(-0.18), Me1(-0.18),
protein palmitoylation	0.104788	0.215382	0.0111083	0.063389	30	0.0627589	0.0330455	0.133513	0.391663	0.360044	Zdhhc15(0.49), Zdhhc15(0.49), Zdhhc20(0.19), Zdhhc14(0.12), Zdhhc18(0.09), Zdhhc8(0.07), Zdhhc8(0.07), Hhat(0.05), Zdhhc17(0.05), Zdhhc17(0.05), Zdhhc21(0.03), Zdhhc21(0.03), Zdhhc1(0), Zdhhc1(0), Selk(-0.04), Zdhhc23(-0.04), Zdhhc7(-0.07), Zdhhc7(-0.07), Zdhhc9(-0.08), Zdhhc5(-0.09), Zdhhc5(-0.09), Zdhhc5(-0.09), Zdhhc3(-0.1), Zdhhc3(-0.1), Zdhhc16(-0.1), Zdhhc16(-0.1), Zdhhc2(-0.14), Zdhhc2(-0.…
regulation of mitophagy	0.131297	0.200146	0.0114512	0.0650313	26	0.169185	0.192676	0.115608	0.0917456	0.231352	Fzd5(0.43), Fbxw7(0.17), Srebf2(0.16), Zbtb17(0.13), Srebf1(0.09), Ctsk(0.08), Map1lc3b(0.08), Polr3a(0.08), Zdhhc8(0.07), Slc17a9(0.05), Cttn(0.03), Wbp11(0.03), Usp36(0.03), Bnip3l(0.01), Dnm1l(0.01), Gsk3a(-0.06), Csnk2a2(-0.07), U2af2(-0.12), Vdac1(-0.16), Actl6a(-0.18), Atg7(-0.18), Wdr75(-0.23), Parl(-0.23), Rpl28(-0.3), Ruvbl1(-0.39), Kat2a(-0.48),
nuclear telomere cap complex	0.1154	0.357019	0.0115723	0.0656135	11	0.161534	0.0751459	0.074765	0.156954	0.41946	Tinf2(0.12), Pot1b(0.05), Terf1(-0.01), Terf1(-0.01), Terf2(-0.02), Terf2(-0.02), Pot1a(-0.03), Pot1a(-0.03), Terf2ip(-0.06), Acd(-0.16), Acd(-0.16),
hydrolase activity, acting on carbon-nitrogen (but not peptide) bonds	0.0870469	0.28401	0.0116954	0.0662055	15	0.34752	0.280565	0.382743	0.00892228	0.0765245	Crmp1(0.55), Gda(0.48), Dpysl2(0.26), Dpysl3(0.07), Nit2(0.05), Upb1(0.03), Naaa(0), Nit1(-0.08), Amdhd2(-0.16), Dpys(-0.18), Nadsyn1(-0.19), Btd(-0.49), Cad(-0.54), Ydjc(-0.55), Vnn1(-0.64),
metal ion transmembrane transporter activity	0.125635	0.282425	0.0118106	0.0667504	12	0.217585	0.163112	0.177817	0.12102	0.1141	Slc39a8(0.35), Slc39a14(0.03), Slc39a13(-0.04), Slc39a1(-0.07), Slc39a3(-0.07), Slc39a9(-0.1), Slc39a5(-0.11), Slc39a6(-0.14), Slc39a4(-0.16), Slc39a7(-0.17), Slc39a10(-0.24), Slc39a11(-0.29),
DNA replication origin binding	0.0799443	0.340587	0.0118887	0.0670752	10	0.444437	0.0785814	0.0743211	0.406857	0.0343256	Cdc45(0.22), Orc4(0.02), Orc4(0.02), Orc6(-0.02), Orc3(-0.1), Mcm10(-0.1), Mcm5(-0.15), Orc2(-0.22), Orc5(-0.24), Mcm2(-0.29),
inward rectifier potassium channel activity	0.0788547	0.306324	0.0119059	0.0670752	17	0.0372856	0.25303	0.275264	0.407542	0.0379545	Kcnh2(0.35), Kcnh2(0.35), Kcnj8(0.34), Kcnj2(0.28), Kcnj2(0.28), Kcnj5(0.18), Kcnj5(0.18), Kcnj16(0.04), Kcnh7(0), Kcnj15(-0.04), Kcnj15(-0.04), Kcnk1(-0.12), Kcnj10(-0.2), Kcnj10(-0.2), Kcnj12(-0.44), Kcnj12(-0.44), Kcnj1(-0.71),
retrograde transport, endosome to plasma membrane	0.12688	0.266067	0.0119619	0.0672832	16	0.308704	0.122584	0.0220839	0.26767	0.224895	Ankrd50(0.45), Micall1(0.3), Rab11b(0.08), Sdccag3(0.06), Snx17(-0.01), Vps39(-0.01), Wash1(-0.1), Wash1(-0.1), Vps26a(-0.15), Vps35(-0.15), Snx31(-0.17), Snx27(-0.17), Snx27(-0.17), Vps29(-0.22), Ankrd27(-0.27), Ankrd27(-0.27),
organelle organization	0.120491	0.289577	0.0122127	0.0684762	13	0.330501	0.266533	0.104177	0.0699637	0.108238	Atp2b2(0.21), Hps5(0.2), Atp2a2(0.14), Hps4(-0.05), Hps3(-0.08), Mul1(-0.12), Tor1a(-0.14), Gorasp2(-0.15), Atg7(-0.18), Dtnbp1(-0.18), Hps6(-0.19), Hps1(-0.26), Rab38(-0.52),
octanoyltransferase activity	0.0797668	0.212754	0.0128321	0.0718355	27	0.327376	0.388599	0.0342799	0.0380781	0.253234	Mboat1(0.56), Nat14(0.33), Nat8f1(0.31), Lpgat1(0.28), Porcn(0.18), Mboat2(0.17), Hhat(0.05), Nat8(0.04), Esco1(0.02), Mboat7(0.01), Pla2g15(0.01), Ykt6(-0.01), Lpcat3(-0.03), Nat6(-0.06), Lclat1(-0.09), Naa40(-0.1), Nat10(-0.18), Naa50(-0.22), Nat8f2(-0.25), Nat9(-0.28), Naa10(-0.44), Acnat2(-0.46), Nat8f5(-0.49), Acnat1(-0.5), Lipt1(-0.5), Lipt2(-0.54), Ciita(-0.55),
serine-type endopeptidase activity	0.0687225	0.151533	0.0131851	0.0735785	92	0.274238	0.16686	0.363855	0.0215278	0.15206	Mmp8(1.13), Prss27(0.94), Prss22(0.92), F10(0.62), Htra4(0.6), Mmp9(0.59), Mmp19(0.57), Rhbdl1(0.54), Corin(0.53), Corin(0.53), Plat(0.51), Plat(0.51), F5(0.49), Hgf(0.46), St14(0.41), Rhbdl3(0.41), F3(0.38), Pamr1(0.34), Hgfac(0.33), Ctsc(0.31), Proz(0.29), Masp1(0.27), Masp1(0.27), Hp(0.26), Rhbdl2(0.21), Rhbdl2(0.21), C1s1(0.19), Pcsk5(0.17), Pcsk5(0.17), Furin(0.15), Furin(0.15), Furin(0.15),…
rRNA catabolic process	0.134963	0.305463	0.0134306	0.0748306	10	0.13985	0.295749	0.171742	0.145022	0.0923185	Xrn1(0.22), Dicer1(0.16), Dis3l(-0.01), Dis3l(-0.01), Dis3l2(-0.04), Drosha(-0.1), Dis3(-0.22), Dis3(-0.22), Exosc4(-0.44), Exosc5(-0.48),
galactose metabolic process	0.131403	0.32236	0.01401	0.0779361	10	0.357129	0.181689	0.109667	0.133335	0.097058	Chst1(0.48), B4galt1(0.18), Galt(-0.02), Galt(-0.02), Galm(-0.1), Galk2(-0.13), Gale(-0.26), Galk1(-0.31), Galk1(-0.31), Galk1(-0.31),
NADPH binding	0.106349	0.274587	0.0140702	0.0781483	14	0.284764	0.273079	0.354959	0.0648486	0.0322036	Kcnab1(0.53), Hmgcr(0.15), Dhfr(0.07), Fasn(0.07), Akr1b10(0.06), Srd5a1(0.01), Qdpr(-0.04), Cryz(-0.16), Grhpr(-0.17), Cbr4(-0.17), Fdxr(-0.3), Decr1(-0.34), Mtrr(-0.46), Cbr3(-0.65),
N-acetyltransferase activity	0.105807	0.162871	0.0147446	0.0816375	41	0.195669	0.467643	0.0391936	0.0906887	0.202528	Nat8l(0.72), Mboat1(0.56), Nat14(0.33), Nat8f1(0.31), Nat8f3(0.29), Lpgat1(0.28), Porcn(0.18), Mboat2(0.17), Sat1(0.13), Kat2b(0.12), Naa30(0.12), Hhat(0.05), Nat8(0.04), Esco1(0.02), Mboat7(0.01), Pla2g15(0.01), Ykt6(-0.01), Naa15(-0.01), Gnpnat1(-0.02), Lpcat3(-0.03), Naa60(-0.03), Ogt(-0.04), Sat2(-0.05), Nat6(-0.06), Smarce1(-0.08), Lclat1(-0.09), Naa40(-0.1), Nat10(-0.18), Csrp2bp(-0.2), Naa…
nuclear chromosome	0.105961	0.198156	0.0148853	0.0821593	28	0.0830699	0.178618	0.0738833	0.510372	0.128724	Airn(0.5), Hmga2(0.4), Setx(0.34), Birc5(0.33), Atrx(0.29), Baz1a(0.19), Spidr(0.16), H3f3b(0.15), Top1(0.13), Blm(0.12), Rad21(0.03), Msh3(-0.05), H2afy(-0.09), H3f3a(-0.1), Msh2(-0.14), Thoc5(-0.19), Rad51(-0.21), Smarcb1(-0.21), Smc2(-0.23), Exosc9(-0.24), Pinx1(-0.25), Top2a(-0.29), Ncapd2(-0.29), Hist1h4h(-0.39), Fignl1(-0.54), Zbtb32(-0.61), Hist1h4i(-0.68), Rec8(-0.8),
beta-tubulin binding	0.130281	0.160619	0.0149816	0.0825621	37	0.393673	0.0915848	0.0284132	0.176609	0.33734	Gja1(0.63), Rgs2(0.51), Ndel1(0.29), Casc1(0.23), Ranbp10(0.17), Htt(0.15), Syt11(0.15), Bbs4(0.1), Pdcd5(0.05), Emd(0.04), Bcas3(0.03), Hdac6(0.02), Capzb(0.01), Racgap1(0), Snca(-0.02), Sncg(-0.04), Ift74(-0.04), Ift74(-0.04), Sirt2(-0.08), Spast(-0.09), Map1s(-0.09), Map1s(-0.09), Vapb(-0.1), Arl8b(-0.1), Tbca(-0.11), Tbcd(-0.11), Tbcd(-0.11), Ttll7(-0.13), Uxt(-0.15), Uxt(-0.15), Trpv4(-0.16)…
L-ascorbic acid binding	0.136192	0.236943	0.015068	0.0829089	17	0.367282	0.136313	0.149062	0.117349	0.118294	P3h3(0.17), P4htm(0.13), Pam(0.12), Phyh(0.04), Plod2(0.04), P3h2(-0.01), P4ha2(-0.04), P4ha1(-0.06), Ogfod3(-0.07), Egln2(-0.08), Plod1(-0.09), Egln1(-0.11), Ogfod1(-0.11), Ogfod2(-0.12), Plod3(-0.18), P3h1(-0.19), Egln3(-0.19),
lipase activity	0.0837519	0.229275	0.0151292	0.0831168	23	0.286037	0.651212	0.136172	0.067175	0.0190575	Liph(0.71), Pla1a(0.2), Dagla(0.19), Lipe(0.12), Lypla1(0.03), Ces2g(0.02), Ddhd1(0.02), Pnpla7(-0.01), Ces1e(-0.04), Plbd1(-0.09), Plbd2(-0.1), Ache(-0.13), Ddhd2(-0.13), Ces1f(-0.15), Lipa(-0.17), Aadac(-0.18), Ldah(-0.18), Ces2b(-0.19), Nceh1(-0.21), Prdx6(-0.3), Daglb(-0.31), Abhd15(-0.39), Ces1g(-0.67),
positive regulation of triglyceride catabolic process	0.06593	0.412402	0.0152557	0.0836818	10	0.474557	0.333747	0.111636	0.405967	0.00193689	Apoh(0.09), Pnpla2(0.02), Pnpla2(0.02), Abhd5(-0.03), Abhd5(-0.03), Aadac(-0.18), Apoa4(-0.26), Apoa4(-0.26), Apoa1(-0.5), Fgf21(-0.99),
cullin-RING ubiquitin ligase complex	0.149837	0.277994	0.0153465	0.0840492	12	0.253344	0.1519	0.0883246	0.117906	0.273178	Cul7(0.25), Cul3(0.14), Cul9(0.03), Cul1(0.01), Cand1(-0.07), Cul4b(-0.07), Ddb1(-0.1), Cul5(-0.13), Cul4a(-0.14), Rbx1(-0.15), Cul2(-0.26), Glmn(-0.48),
NAD biosynthetic process	0.0514426	0.373267	0.0154028	0.0842276	11	0.469138	0.255244	0.367317	0.0024668	0.172806	Nmnat2(0.44), Aspdh(0.14), Naprt(-0.01), Kynu(-0.03), Qprt(-0.17), Qprt(-0.17), Nadsyn1(-0.19), Nadsyn1(-0.19), Nampt(-0.27), Nmnat1(-0.27), Nmnat3(-0.28),
membrane fusion	0.118188	0.214995	0.0157106	0.085778	27	0.125983	0.186312	0.197426	0.134639	0.206506	Adam8(0.71), Hace1(0.14), Dcstamp(0.1), Dcstamp(0.1), Vamp2(0.07), Dnm3(0.06), Dnm2(0.05), Ubxn2a(0.02), Dnm1(0.01), Dnm1l(0.01), Dnm1l(0.01), Stx3(0), Snap23(-0.01), Uso1(-0.01), Uso1(-0.01), Napg(-0.01), Napb(-0.02), Stx4a(-0.02), Vamp8(-0.04), Chp1(-0.04), Ubxn2b(-0.04), Vps33b(-0.08), Napa(-0.09), Anxa7(-0.1), Bloc1s6(-0.12), Nsfl1c(-0.15), Nsfl1c(-0.15),
SCF-dependent proteasomal ubiquitin-dependent protein catabolic process	0.112799	0.211102	0.0158981	0.0866679	28	0.51525	0.148688	0.0855575	0.137513	0.0906568	Fbxo2(0.43), Fbxl3(0.2), Fbxl3(0.2), Fbxw7(0.17), Fbxw11(0.17), Fbxw11(0.17), Fbxl7(0.16), Ccnf(0.1), Cul1(0.01), Cul1(0.01), Wwtr1(0), Btrc(-0.03), Fbxo4(-0.03), Fbxo36(-0.05), Fbxo9(-0.05), Rnf7(-0.06), Fbxl5(-0.06), Fbxl2(-0.09), Fbxw5(-0.1), Fbxw5(-0.1), Rbx1(-0.15), Fbxl15(-0.19), Fbxo31(-0.2), Fbxo31(-0.2), Skp1a(-0.25), Skp1a(-0.25), Fbxo6(-0.32), Fbxo6(-0.32),
acyl-CoA ligase activity	0.0613013	0.351182	0.0159928	0.0870498	11	0.600966	0.522129	0.117324	0.0199046	0.0312589	Slc27a2(0.06), Slc27a4(-0.02), Sucla2(-0.03), Acsm1(-0.07), Acsm1(-0.07), Slc27a3(-0.08), Suclg2(-0.13), Slc27a1(-0.15), Acsf2(-0.2), Acsf3(-0.21), Aasdh(-0.22),
biosynthetic process	0.0633087	0.216406	0.0160238	0.0870847	29	0.832939	0.354087	0.0702482	0.00544357	0.0861254	Sptlc3(0.54), Aadat(0.45), Nmnat2(0.44), Accs(0.29), Alas2(0.25), Pcyt2(0.22), Fdft1(0.14), Fasn(0.07), Aldh1l1(0.07), Kyat3(0.01), Gmppb(0), Got1(-0.02), Pcyt1a(-0.03), Gpt(-0.08), Sptlc2(-0.09), Apmap(-0.1), Got2(-0.11), Sptlc1(-0.13), Alas1(-0.16), Gmppa(-0.19), Ndufaf6(-0.21), Fpgs(-0.24), Coasy(-0.24), Kyat1(-0.28), Nmnat3(-0.28), Mtfmt(-0.3), Aldh1l2(-0.32), Gart(-0.38), Gpt2(-0.86),
ubiquitin-dependent protein catabolic process via the multivesicular body sorting pathway	0.110769	0.327033	0.0162787	0.0880055	11	0.668642	0.141548	0.0489446	0.0838099	0.134082	Vps4b(0.09), Ubap1(0.06), Ubap1(0.06), Ptpn23(0.06), Hdac6(0.02), Tsg101(0.02), Vps37a(0), Rnf115(-0.04), Vps4a(-0.09), Vps28(-0.14), Rnf126(-0.35),
Swr1 complex	0.143604	0.311487	0.0163084	0.0880055	10	0.530442	0.0655784	0.102325	0.193132	0.113147	Ing3(0.22), Brd8(0.21), Trrap(0.21), Ep400(0.19), Kat5(0.02), Znhit1(-0.29), Ruvbl1(-0.39), Ruvbl1(-0.39), Ruvbl2(-0.51), Ruvbl2(-0.51),
microtubule-severing ATPase activity	0.143534	0.309823	0.016442	0.0880055	10	0.195537	0.0870279	0.296814	0.147672	0.16512	Fignl2(0.1), Fign(0.08), Katna1(0.03), Katna1(0.03), Katnb1(-0.03), Spast(-0.09), Spast(-0.09), Katnal1(-0.11), Atad1(-0.14), Fignl1(-0.54),
membrane protein proteolysis	0.0935454	0.309297	0.0169215	0.0904352	14	0.50075	0.246047	0.110828	0.0464628	0.123554	Ret(0.51), Sppl2a(0.06), Sppl2a(0.06), Sppl3(0.05), Sppl3(0.05), H13(-0.08), H13(-0.08), Ctsh(-0.12), Ctsh(-0.12), Sppl2b(-0.21), Sppl2b(-0.21), Napsa(-0.22), Napsa(-0.22), Rhbdd1(-0.25),
Set1C/COMPASS complex	0.136657	0.304652	0.017023	0.0908405	11	0.483926	0.32039	0.0295883	0.0948474	0.150537	Setd1a(0.14), Wdr82(0.13), Hcfc1(0.07), Rbbp5(-0.02), Rbbp5(-0.02), Cxxc1(-0.05), Ash2l(-0.16), Ash2l(-0.16), Wdr5(-0.19), Dpy30(-0.28), Dpy30(-0.28),
dolichyl pyrophosphate Man9GlcNAc2 alpha-1,3-glucosyltransferase activity	0.113026	0.144791	0.0173397	0.0922522	49	0.0136678	0.0586841	0.210141	0.659558	0.289284	B3galt1(0.56), Galnt15(0.51), Galnt16(0.48), Wbscr17(0.22), B4galt1(0.18), Galnt12(0.17), B4galt3(0.15), B3gnt3(0.13), Fut9(0.11), B4galt4(0.11), B3gnt7(0.11), B4galt2(0.07), Dpy19l4(0.07), B3galt2(0.06), B3gnt9(0.06), Dpy19l3(0.05), Pigv(0.04), Galnt10(0.02), B4galt5(0.01), Uggt1(0.01), Dpy19l1(0), B3glct(0), Fut4(-0.01), Pigm(-0.02), Galnt14(-0.04), Glt8d1(-0.04), B3gnt2(-0.05), Fut11(-0.06), A…
beta-2-microglobulin binding	0.141845	0.292342	0.0175272	0.0931098	11	0.342779	0.138751	0.198142	0.192969	0.0659173	H2-Q10(0.95), Cd1d1(0.04), H2-D1(0.01), H2-Q4(-0.01), H2-K1(-0.02), H2-Q2(-0.05), Hfe(-0.07), H2-T23(-0.17), H2-Q7(-0.25), Fcgrt(-0.32), Fcgrt(-0.32),
metallocarboxypeptidase activity	0.137657	0.26683	0.0179412	0.0951662	14	0.115219	0.168908	0.249412	0.185425	0.167798	Cpm(0.27), Aebp1(0.17), Cpd(0.1), Agbl5(0.01), Agbl5(0.01), Cpxm1(-0.05), Agtpbp1(-0.07), Cpxm2(-0.11), Cpn1(-0.11), Agbl3(-0.18), Agbl3(-0.18), Ace2(-0.42), Cpe(-0.56), Cpb2(-1.56),
HOPS complex	0.116268	0.323116	0.0180478	0.0955887	15	0.465508	0.117435	0.0653891	0.141202	0.2044	Hook3(0.14), Vps18(0.08), Vps18(0.08), Stx17(0.07), Vps11(0.05), Vps11(0.05), Vps16(0), Vps16(0), Vps39(-0.01), Hook1(-0.09), Vps41(-0.09), Vps41(-0.09), Aktip(-0.12), Vps33a(-0.14), Hook2(-0.21),
aldehyde dehydrogenase (NAD) activity	0.034219	0.36004	0.0181648	0.0960645	19	0.888385	0.585631	0.128431	3.19375e-05	0.162799	Aldh1a3(0.73), Aldh4a1(0.2), Aldh4a1(0.2), Aldh1a2(0.14), Aldh1b1(0.11), Aldh1l1(0.07), Aldh8a1(-0.05), Aldh2(-0.06), Aldh2(-0.06), Aldh6a1(-0.06), Aldh3a2(-0.07), Aldh3a2(-0.07), Aldh5a1(-0.07), Aldh9a1(-0.08), Aldh7a1(-0.09), Aldh1a1(-0.22), Aldh1l2(-0.32), Aldh1a7(-0.45), Aldh3b1(-0.49),
one-carbon metabolic process	0.0994414	0.214813	0.018343	0.0968618	25	0.644844	0.257887	0.247388	0.0236227	0.0421354	Car3(0.52), Car8(0.3), Car2(0.28), Car12(0.16), Ahcyl2(0.08), Dhfr(0.07), Aldh1l1(0.07), Mthfd2l(0.04), Car13(0.02), Car9(-0.05), Mat2b(-0.06), Mthfr(-0.07), Mthfd1(-0.07), Ahcyl1(-0.09), Car5b(-0.11), Car4(-0.15), Car7(-0.18), Fpgs(-0.24), Shmt1(-0.24), Shmt2(-0.24), Gnmt(-0.27), Mthfd1l(-0.29), Aldh1l2(-0.32), Mat2a(-0.4), Mthfd2(-0.66),
clathrin adaptor complex	0.164183	0.228295	0.0183818	0.0969222	17	0.193478	0.234484	0.147346	0.170484	0.140002	Lrrn3(0.27), Gga3(0.12), Ap4m1(0.11), Ap1g1(0.1), Ap2b1(0.05), Ap3b1(0.03), Ap1b1(0.01), Ap2a1(-0.02), Ap2a2(-0.03), Gga1(-0.03), Ap3m1(-0.04), Ap3m2(-0.05), Ap1m2(-0.11), Ap2m1(-0.18), Ap1m1(-0.2), Gga2(-0.27), Ap1g2(-0.31),
endoplasmic reticulum chaperone complex	0.135668	0.331098	0.0184303	0.0970334	12	0.210497	0.0366246	0.24881	0.0988075	0.458281	Hspa5(0.17), Hspa5(0.17), Hsp90b1(0.05), Dnajc10(0.05), Ppib(0), Dnajb11(0), Hyou1(-0.02), Pdia6(-0.05), P4hb(-0.09), Pdia4(-0.2), Sdf2l1(-0.21), Ugt1a1(-0.35),
Hsp70 protein binding	0.1253	0.175787	0.0188376	0.0990302	31	0.508248	0.133858	0.203134	0.0482785	0.142882	Dnajb1(0.56), Fgf1(0.45), Dnaja1(0.44), Nod2(0.4), Creb1(0.19), Nr3c1(0.19), Ern1(0.18), Mvd(0.17), Cdkn1b(0.14), Iqcg(0.11), Bag6(0.06), Dnajc10(0.05), Park2(-0.02), Hdac8(-0.1), St13(-0.1), Stau2(-0.12), Stub1(-0.12), Stub1(-0.12), Stub1(-0.12), Stip1(-0.13), Mettl21a(-0.15), Dnajc2(-0.16), Fkbp1a(-0.22), Hikeshi(-0.25), Rps3(-0.32), Bax(-0.34), Pacrg(-0.34), Tfrc(-0.36), Dnaja3(-0.44), Cdk1(-0…
protein catabolic process	0.122322	0.170148	0.0189138	0.099198	39	0.592801	0.248018	0.105202	0.199071	0.0178513	Mmp3(0.65), Ambp(0.37), Ubr2(0.34), Lnpep(0.33), Cast(0.25), Rnf165(0.21), Ctsd(0.17), Bace1(0.17), Siah1a(0.13), Ubr1(0.11), Trim24(0.08), Trim24(0.08), Syvn1(0.02), Axin1(0.01), Btrc(-0.03), Bace2(-0.03), Ctse(-0.04), Vhl(-0.04), Wdyhv1(-0.04), Lonp2(-0.05), Traf2(-0.06), Clpx(-0.1), Pja1(-0.12), Psmc1(-0.12), Akt1(-0.13), Rbx1(-0.15), Psmc2(-0.16), Psmc5(-0.16), Psmc6(-0.16), Lonp1(-0.16), Psm…
positive regulation of type I interferon-mediated signaling pathway	0.100851	0.309084	0.0189256	0.099198	11	0.0171191	0.157434	0.271356	0.303389	0.345536	Trim6(0.06), Trim6(0.06), Lsm14a(0.04), Irf3(-0.1), Nlrc5(-0.13), Ube2k(-0.14), Fadd(-0.25), Mavs(-0.26), Wnt5a(-0.3), Irf7(-0.45), Zbp1(-0.7),
telomere capping	0.139903	0.325644	0.0190658	0.099785	11	0.0865643	0.123453	0.12411	0.206859	0.442679	Hnrnpa2b1(0.1), Pot1b(0.05), Rad50(-0.02), Terf2(-0.02), Pot1a(-0.03), Pot1a(-0.03), Prkdc(-0.04), Nbn(-0.07), Obfc1(-0.07), Acd(-0.16), Acd(-0.16),
SRP-dependent cotranslational protein targeting to membrane	0.15854	0.332008	0.0191169	0.0998856	10	0.0946443	0.0791746	0.248302	0.318093	0.224322	Sec63(0.17), Sec63(0.17), Srp9(0.04), Srpr(-0.03), Srp68(-0.03), Sec61a1(-0.04), Ssr3(-0.04), Srp19(-0.09), Srp72(-0.11), Srp14(-0.15),
nonmotile primary cilium assembly	0.0835653	0.213315	0.0191414	0.0998856	32	0.0365937	0.206366	0.349504	0.0634017	0.456812	Cep250(0.43), Cep290(0.2), Arl13b(0.17), Vangl2(0.16), Bbs1(0.12), Bbs1(0.12), Bbs1(0.12), Csnk1d(0.12), Csnk1d(0.12), Bbs4(0.1), C2cd3(0.1), Cep131(0.08), Pcm1(0.05), Cc2d2a(0.05), Kif3a(0.02), Fuz(0.01), Fuz(0.01), Gorab(0.01), Ift80(-0.04), Ift88(-0.05), Cep89(-0.08), Pibf1(-0.09), Cenpj(-0.11), Bbs7(-0.17), Tmem17(-0.21), Cep126(-0.22), Mks1(-0.22), Mkks(-0.3), Mkks(-0.3), Bbs10(-0.35), Tmem1…
polysome	0.140205	0.166161	0.0194462	0.101326	37	0.434637	0.247862	0.0268385	0.145773	0.215284	Ago2(0.33), Cpeb2(0.31), Piwil2(0.26), Fus(0.26), Eif2ak4(0.17), Naa30(0.12), Fxr2(0.11), Atxn2(0.09), Gcn1l1(0.09), Ybx2(0.08), Unk(0.08), Unk(0.08), Fmr1(0.07), Fmr1(0.07), Fmr1(0.07), Impact(0.07), Vbp1(0.05), Msi2(0.04), Fxr1(0.01), Rpl17(0), Naa35(-0.03), Eif4h(-0.05), Ago1(-0.06), Msi1(-0.09), Calr(-0.1), Eef2(-0.1), Eif4b(-0.13), Rps6(-0.14), Mcrs1(-0.14), Drg1(-0.21), Rpl7(-0.24), Rps25(-…
cell volume homeostasis	0.138558	0.284805	0.0201529	0.103516	11	0.311347	0.287476	0.12468	0.293807	0.0330112	P2rx7(0.32), Lrrc8a(0.27), Slc12a7(0.11), Aqp1(0.08), Add1(-0.03), Kcnn4(-0.06), Aqp2(-0.16), E2f4(-0.16), Clns1a(-0.47), Npm1(-0.47), Npm1(-0.47),
MLL1 complex	0.131648	0.180267	0.0202127	0.103516	30	0.191507	0.106861	0.317024	0.284191	0.077757	Kmt2a(0.53), Las1l(0.35), Kansl1(0.26), Taf1(0.22), Mga(0.2), Taf7(0.15), Chd8(0.14), Rnf2(0.11), Taf4(0.09), Hcfc1(0.07), Phf20(0.07), Rbbp5(-0.02), Ino80c(-0.03), Tex10(-0.05), Tex10(-0.05), Pelp1(-0.1), Senp3(-0.1), Max(-0.12), Mcrs1(-0.14), Taf6(-0.16), Ash2l(-0.16), E2f6(-0.16), Wdr5(-0.19), Kat8(-0.21), Prpf31(-0.24), Taf9(-0.34), 0610010K14Rik(-0.38), 0610010K14Rik(-0.38), Ruvbl1(-0.39), R…
cellular response to gamma radiation	0.167159	0.198497	0.0202655	0.103516	22	0.142014	0.183182	0.159575	0.165754	0.261664	Egr1(0.48), Tlk2(0.19), Kdm1a(0.17), Cdkn1a(0.15), Elk1(0.15), Yap1(0.12), Bcl2l1(0.06), Tspyl5(0.06), Wrn(-0.04), Wrn(-0.04), Atr(-0.06), Cryab(-0.07), Atm(-0.13), Rnf4(-0.16), Xrcc5(-0.18), Gtf2h5(-0.19), Ddias(-0.24), Tmem109(-0.26), H2afx(-0.28), Xrcc6(-0.37), Trp53(-0.49), Chek2(-0.51),
prenylcysteine methylesterase activity	0.110572	0.235553	0.0204515	0.103516	19	0.28781	0.592416	0.115402	0.062804	0.0647987	Liph(0.71), Pla1a(0.2), Dagla(0.19), Ces2g(0.02), Ddhd1(0.02), Pnpla7(-0.01), Ces1e(-0.04), Plbd1(-0.09), Plbd2(-0.1), Ache(-0.13), Ddhd2(-0.13), Ces1f(-0.15), Ldah(-0.18), Ces2b(-0.19), Nceh1(-0.21), Prdx6(-0.3), Daglb(-0.31), Abhd15(-0.39), Ces1g(-0.67),
1-oxa-2-oxocycloheptane lactonase activity	0.110572	0.235553	0.0204515	0.103516	19	0.28781	0.592416	0.115402	0.062804	0.0647987	Liph(0.71), Pla1a(0.2), Dagla(0.19), Ces2g(0.02), Ddhd1(0.02), Pnpla7(-0.01), Ces1e(-0.04), Plbd1(-0.09), Plbd2(-0.1), Ache(-0.13), Ddhd2(-0.13), Ces1f(-0.15), Ldah(-0.18), Ces2b(-0.19), Nceh1(-0.21), Prdx6(-0.3), Daglb(-0.31), Abhd15(-0.39), Ces1g(-0.67),
sulfolactone hydrolase activity	0.110572	0.235553	0.0204515	0.103516	19	0.28781	0.592416	0.115402	0.062804	0.0647987	Liph(0.71), Pla1a(0.2), Dagla(0.19), Ces2g(0.02), Ddhd1(0.02), Pnpla7(-0.01), Ces1e(-0.04), Plbd1(-0.09), Plbd2(-0.1), Ache(-0.13), Ddhd2(-0.13), Ces1f(-0.15), Ldah(-0.18), Ces2b(-0.19), Nceh1(-0.21), Prdx6(-0.3), Daglb(-0.31), Abhd15(-0.39), Ces1g(-0.67),
butyrolactone hydrolase activity	0.110572	0.235553	0.0204515	0.103516	19	0.28781	0.592416	0.115402	0.062804	0.0647987	Liph(0.71), Pla1a(0.2), Dagla(0.19), Ces2g(0.02), Ddhd1(0.02), Pnpla7(-0.01), Ces1e(-0.04), Plbd1(-0.09), Plbd2(-0.1), Ache(-0.13), Ddhd2(-0.13), Ces1f(-0.15), Ldah(-0.18), Ces2b(-0.19), Nceh1(-0.21), Prdx6(-0.3), Daglb(-0.31), Abhd15(-0.39), Ces1g(-0.67),
endosulfan lactone lactonase activity	0.110572	0.235553	0.0204515	0.103516	19	0.28781	0.592416	0.115402	0.062804	0.0647987	Liph(0.71), Pla1a(0.2), Dagla(0.19), Ces2g(0.02), Ddhd1(0.02), Pnpla7(-0.01), Ces1e(-0.04), Plbd1(-0.09), Plbd2(-0.1), Ache(-0.13), Ddhd2(-0.13), Ces1f(-0.15), Ldah(-0.18), Ces2b(-0.19), Nceh1(-0.21), Prdx6(-0.3), Daglb(-0.31), Abhd15(-0.39), Ces1g(-0.67),
L-ascorbate 6-phosphate lactonase activity	0.110572	0.235553	0.0204515	0.103516	19	0.28781	0.592416	0.115402	0.062804	0.0647987	Liph(0.71), Pla1a(0.2), Dagla(0.19), Ces2g(0.02), Ddhd1(0.02), Pnpla7(-0.01), Ces1e(-0.04), Plbd1(-0.09), Plbd2(-0.1), Ache(-0.13), Ddhd2(-0.13), Ces1f(-0.15), Ldah(-0.18), Ces2b(-0.19), Nceh1(-0.21), Prdx6(-0.3), Daglb(-0.31), Abhd15(-0.39), Ces1g(-0.67),
Ser-tRNA(Thr) hydrolase activity	0.110572	0.235553	0.0204515	0.103516	19	0.28781	0.592416	0.115402	0.062804	0.0647987	Liph(0.71), Pla1a(0.2), Dagla(0.19), Ces2g(0.02), Ddhd1(0.02), Pnpla7(-0.01), Ces1e(-0.04), Plbd1(-0.09), Plbd2(-0.1), Ache(-0.13), Ddhd2(-0.13), Ces1f(-0.15), Ldah(-0.18), Ces2b(-0.19), Nceh1(-0.21), Prdx6(-0.3), Daglb(-0.31), Abhd15(-0.39), Ces1g(-0.67),
Ala-tRNA(Pro) hydrolase activity	0.110572	0.235553	0.0204515	0.103516	19	0.28781	0.592416	0.115402	0.062804	0.0647987	Liph(0.71), Pla1a(0.2), Dagla(0.19), Ces2g(0.02), Ddhd1(0.02), Pnpla7(-0.01), Ces1e(-0.04), Plbd1(-0.09), Plbd2(-0.1), Ache(-0.13), Ddhd2(-0.13), Ces1f(-0.15), Ldah(-0.18), Ces2b(-0.19), Nceh1(-0.21), Prdx6(-0.3), Daglb(-0.31), Abhd15(-0.39), Ces1g(-0.67),
Cys-tRNA(Pro) hydrolase activity	0.110572	0.235553	0.0204515	0.103516	19	0.28781	0.592416	0.115402	0.062804	0.0647987	Liph(0.71), Pla1a(0.2), Dagla(0.19), Ces2g(0.02), Ddhd1(0.02), Pnpla7(-0.01), Ces1e(-0.04), Plbd1(-0.09), Plbd2(-0.1), Ache(-0.13), Ddhd2(-0.13), Ces1f(-0.15), Ldah(-0.18), Ces2b(-0.19), Nceh1(-0.21), Prdx6(-0.3), Daglb(-0.31), Abhd15(-0.39), Ces1g(-0.67),
Ser(Gly)-tRNA(Ala) hydrolase activity	0.110572	0.235553	0.0204515	0.103516	19	0.28781	0.592416	0.115402	0.062804	0.0647987	Liph(0.71), Pla1a(0.2), Dagla(0.19), Ces2g(0.02), Ddhd1(0.02), Pnpla7(-0.01), Ces1e(-0.04), Plbd1(-0.09), Plbd2(-0.1), Ache(-0.13), Ddhd2(-0.13), Ces1f(-0.15), Ldah(-0.18), Ces2b(-0.19), Nceh1(-0.21), Prdx6(-0.3), Daglb(-0.31), Abhd15(-0.39), Ces1g(-0.67),
all-trans-retinyl-palmitate hydrolase, all-trans-retinol forming activity	0.110572	0.235553	0.0204515	0.103516	19	0.28781	0.592416	0.115402	0.062804	0.0647987	Liph(0.71), Pla1a(0.2), Dagla(0.19), Ces2g(0.02), Ddhd1(0.02), Pnpla7(-0.01), Ces1e(-0.04), Plbd1(-0.09), Plbd2(-0.1), Ache(-0.13), Ddhd2(-0.13), Ces1f(-0.15), Ldah(-0.18), Ces2b(-0.19), Nceh1(-0.21), Prdx6(-0.3), Daglb(-0.31), Abhd15(-0.39), Ces1g(-0.67),
retinyl-palmitate esterase activity	0.110572	0.235553	0.0204515	0.103516	19	0.28781	0.592416	0.115402	0.062804	0.0647987	Liph(0.71), Pla1a(0.2), Dagla(0.19), Ces2g(0.02), Ddhd1(0.02), Pnpla7(-0.01), Ces1e(-0.04), Plbd1(-0.09), Plbd2(-0.1), Ache(-0.13), Ddhd2(-0.13), Ces1f(-0.15), Ldah(-0.18), Ces2b(-0.19), Nceh1(-0.21), Prdx6(-0.3), Daglb(-0.31), Abhd15(-0.39), Ces1g(-0.67),
mannosyl-oligosaccharide 1,6-alpha-mannosidase activity	0.110572	0.235553	0.0204515	0.103516	19	0.28781	0.592416	0.115402	0.062804	0.0647987	Liph(0.71), Pla1a(0.2), Dagla(0.19), Ces2g(0.02), Ddhd1(0.02), Pnpla7(-0.01), Ces1e(-0.04), Plbd1(-0.09), Plbd2(-0.1), Ache(-0.13), Ddhd2(-0.13), Ces1f(-0.15), Ldah(-0.18), Ces2b(-0.19), Nceh1(-0.21), Prdx6(-0.3), Daglb(-0.31), Abhd15(-0.39), Ces1g(-0.67),
mannosyl-oligosaccharide 1,3-alpha-mannosidase activity	0.110572	0.235553	0.0204515	0.103516	19	0.28781	0.592416	0.115402	0.062804	0.0647987	Liph(0.71), Pla1a(0.2), Dagla(0.19), Ces2g(0.02), Ddhd1(0.02), Pnpla7(-0.01), Ces1e(-0.04), Plbd1(-0.09), Plbd2(-0.1), Ache(-0.13), Ddhd2(-0.13), Ces1f(-0.15), Ldah(-0.18), Ces2b(-0.19), Nceh1(-0.21), Prdx6(-0.3), Daglb(-0.31), Abhd15(-0.39), Ces1g(-0.67),
methyl indole-3-acetate esterase activity	0.110572	0.235553	0.0204515	0.103516	19	0.28781	0.592416	0.115402	0.062804	0.0647987	Liph(0.71), Pla1a(0.2), Dagla(0.19), Ces2g(0.02), Ddhd1(0.02), Pnpla7(-0.01), Ces1e(-0.04), Plbd1(-0.09), Plbd2(-0.1), Ache(-0.13), Ddhd2(-0.13), Ces1f(-0.15), Ldah(-0.18), Ces2b(-0.19), Nceh1(-0.21), Prdx6(-0.3), Daglb(-0.31), Abhd15(-0.39), Ces1g(-0.67),
methyl salicylate esterase activity	0.110572	0.235553	0.0204515	0.103516	19	0.28781	0.592416	0.115402	0.062804	0.0647987	Liph(0.71), Pla1a(0.2), Dagla(0.19), Ces2g(0.02), Ddhd1(0.02), Pnpla7(-0.01), Ces1e(-0.04), Plbd1(-0.09), Plbd2(-0.1), Ache(-0.13), Ddhd2(-0.13), Ces1f(-0.15), Ldah(-0.18), Ces2b(-0.19), Nceh1(-0.21), Prdx6(-0.3), Daglb(-0.31), Abhd15(-0.39), Ces1g(-0.67),
methyl jasmonate esterase activity	0.110572	0.235553	0.0204515	0.103516	19	0.28781	0.592416	0.115402	0.062804	0.0647987	Liph(0.71), Pla1a(0.2), Dagla(0.19), Ces2g(0.02), Ddhd1(0.02), Pnpla7(-0.01), Ces1e(-0.04), Plbd1(-0.09), Plbd2(-0.1), Ache(-0.13), Ddhd2(-0.13), Ces1f(-0.15), Ldah(-0.18), Ces2b(-0.19), Nceh1(-0.21), Prdx6(-0.3), Daglb(-0.31), Abhd15(-0.39), Ces1g(-0.67),
chaperone mediated protein folding requiring cofactor	0.0929364	0.298298	0.0206742	0.104493	15	0.250978	0.371743	0.354323	0.0480157	0.0636439	Hsph1(0.63), Dnajb1(0.56), Hspa8(0.24), Hspa8(0.24), Ero1l(-0.02), Tor1b(-0.05), H2-DMa(-0.08), H2-DMa(-0.08), Cd74(-0.09), Cd74(-0.09), Hspd1(-0.14), Tor1a(-0.14), H2-DMb1(-0.28), Tor2a(-0.28), Hspe1(-0.31),
poly(U) RNA binding	0.147178	0.241282	0.0211358	0.10654	17	0.126757	0.355141	0.240295	0.187823	0.0754366	Atxn1(0.53), Patl1(0.15), Cirbp(0.13), Fmr1(0.07), Msi2(0.04), Dis3l2(-0.04), Dis3l2(-0.04), Khdrbs1(-0.06), Msi1(-0.09), Hnrnpc(-0.1), Rbm11(-0.11), Rbm11(-0.11), Mcrs1(-0.14), Pabpc1(-0.17), Pnpt1(-0.17), Pabpc4(-0.19), Rps7(-0.42),
palmitoyl-CoA hydrolase activity	0.0765242	0.306508	0.0211394	0.10654	15	0.812798	0.267942	0.205412	0.00980503	0.0490675	Baat(0.54), Acot5(0.35), Acot9(-0.02), Ces1e(-0.04), Them4(-0.07), Hnf4a(-0.1), Ppt1(-0.11), Acot3(-0.14), Acot2(-0.15), Acot4(-0.15), Acot7(-0.19), Acot7(-0.19), Gnpat(-0.21), Acot8(-0.24), Acot1(-0.57),
microtubule-based process	0.140963	0.167375	0.0216512	0.108964	34	0.277935	0.119297	0.141967	0.240341	0.164934	Map1b(0.51), Tuba8(0.5), Lyst(0.44), Tubb4a(0.34), Tuba1a(0.31), Pafah1b1(0.17), Kif5b(0.11), Vbp1(0.05), Tubb2b(0.05), Nek9(0.03), Tubb6(0.02), Map3k11(0), Kif17(-0.02), Dynll2(-0.05), Xrn2(-0.07), Kifap3(-0.08), Dynll1(-0.12), Dctn3(-0.14), Tubg2(-0.14), Tuba1c(-0.16), Tuba4a(-0.17), Dctn2(-0.17), Kifc3(-0.19), Tubb2a(-0.19), Tubb5(-0.19), Tubb5(-0.19), Dnal4(-0.19), Tubg1(-0.25), Cryaa(-0.26),…
enzyme regulator activity	0.165337	0.223162	0.0217184	0.109148	18	0.203833	0.133743	0.0841294	0.315425	0.235617	Dnmt3l(0.43), Dcp1a(0.21), Rab3gap2(0.19), Calm2(0.18), Dcp1b(0.03), Mtmr9(0), Sept2(-0.05), Calm1(-0.06), Brcc3(-0.08), Psmd2(-0.09), Psmd1(-0.09), Psmd3(-0.1), Rgn(-0.16), Calm3(-0.19), Gclm(-0.26), Prpsap1(-0.26), Dpm2(-0.29), Dpm2(-0.29),
phospholipase activity	0.13796	0.195655	0.021793	0.109367	25	0.120033	0.261806	0.181557	0.151096	0.224018	Liph(0.71), Pla2g4a(0.27), Pla1a(0.2), Dagla(0.19), Lipg(0.11), Lipg(0.11), Sec23ip(0.04), Ces2g(0.02), Ddhd1(0.02), Pnpla7(-0.01), Ces1e(-0.04), Plbd1(-0.09), Plbd2(-0.1), Ache(-0.13), Ddhd2(-0.13), Abhd6(-0.14), Ces1f(-0.15), Ldah(-0.18), Ces2b(-0.19), Nceh1(-0.21), Napepld(-0.25), Prdx6(-0.3), Daglb(-0.31), Abhd15(-0.39), Ces1g(-0.67),
THO complex part of transcription export complex	0.146001	0.301871	0.022004	0.110245	11	0.460217	0.145523	0.0929761	0.146608	0.165024	BC005561(0.33), Thoc2(0.16), Thoc2(0.16), Thoc1(-0.01), Thoc7(-0.13), Thoc7(-0.13), Thoc6(-0.14), Thoc5(-0.19), Thoc5(-0.19), Thoc3(-0.22), Thoc3(-0.22),
sperm capacitation	0.120172	0.26072	0.0220304	0.110245	15	0.238539	0.192415	0.570161	0.268806	0.00652024	Catsper2(0.25), Acrbp(0.24), Calca(0.17), Cabyr(0.06), Abhd2(0.02), Prkaca(-0.04), Ropn1l(-0.07), Slc26a6(-0.08), Catsper4(-0.08), Dld(-0.09), Cftr(-0.19), Pebp1(-0.32), Sept4(-0.39), Pcsk4(-0.49), Pcsk4(-0.49),
mitochondrial respiratory chain complex IV	0.0961553	0.297775	0.0222276	0.111075	14	0.361284	0.149732	0.611407	0.149902	0.00944971	AA467197(0.68), Cox8b(0.32), COX1(0.08), Cox8a(-0.03), Ndufa4(-0.05), Ndufa4(-0.05), Cox5b(-0.07), Cox4i1(-0.12), Cox6a1(-0.13), Ndufa4l2(-0.13), Cox5a(-0.18), Cox4i2(-0.34), Cox4i2(-0.34), Cox6a2(-0.39),
histone binding	0.159346	0.107837	0.0225033	0.112294	101	0.362488	0.1414	0.107845	0.17387	0.18957	Spty2d1(0.42), Sirt1(0.4), Chd2(0.39), Smarca2(0.37), Rsf1(0.35), Jak2(0.31), Atrx(0.29), Atrx(0.29), Atrx(0.29), Hinfp(0.29), Brd1(0.28), Supt6(0.27), Supt6(0.27), Mysm1(0.25), Tnks(0.23), Tbl1xr1(0.21), Baz2a(0.21), Phf21b(0.21), Atad2b(0.21), Trp53bp1(0.17), H3f3b(0.15), Baz1b(0.15), Chd8(0.14), Chd8(0.14), Hoxb5os(0.14), Ctsl(0.13), Rnf8(0.13), Rnf8(0.13), Dek(0.12), Dek(0.12), Pygo2(0.1), Py…
response to heat	0.122894	0.190992	0.0225645	0.112441	34	0.430143	0.226655	0.108511	0.0451405	0.265812	Hspa1a(1.41), Hspa1a(1.41), Hspa1b(1.37), Osm(0.69), Cckar(0.56), Dnaja1(0.44), Trp53inp1(0.35), Ccl2(0.27), Tgfb1i1(0.22), Calca(0.17), Dnaja4(0.17), Igf1(0.12), Hspb7(0.11), Psip1(0.11), Mapk8(0.07), Gclc(0.05), Hspb2(0.04), Nos1(0.01), Map2k7(-0.02), Dnaja2(-0.05), Sod1(-0.1), Hspa4(-0.11), Trpv2(-0.13), Eif2b2(-0.19), Hsf1(-0.2), Hsf1(-0.2), Eif2b5(-0.21), Eif2b4(-0.22), Eif2b1(-0.3), Lrp11(-…
regulation of proteasomal protein catabolic process	0.16779	0.241072	0.0226137	0.112449	15	0.333372	0.200193	0.118565	0.104889	0.220686	Pkd1(0.25), Pkd1(0.25), Rhbdf1(0.1), Tmf1(0.08), Ubb(0.05), Btrc(-0.03), Prkaca(-0.04), Psme2(-0.06), Uchl5(-0.14), Psme1(-0.18), Gpx1(-0.21), Usp14(-0.23), Psmd14(-0.28), Psme3(-0.3), Psme3(-0.3),
metal ion transport	0.151481	0.20623	0.0226297	0.112449	22	0.346296	0.307106	0.214399	0.104478	0.0630041	Trpm6(0.83), Slc39a8(0.35), Atp7a(0.17), Slc39a14(0.03), Ccs(0), Ndfip1(0), Atp1b3(-0.02), Slc39a13(-0.04), Slc39a1(-0.07), Slc39a3(-0.07), Ndfip2(-0.1), Slc39a9(-0.1), Slc39a5(-0.11), Atp1b1(-0.12), Slc39a6(-0.14), Slc39a4(-0.16), Slc39a7(-0.17), Armc1(-0.19), Atox1(-0.23), Slc39a10(-0.24), Slc39a11(-0.29), Atp7b(-0.44),
signal peptide processing	0.174026	0.258254	0.0228426	0.113348	13	0.211337	0.183442	0.147673	0.158533	0.236616	Pcsk5(0.17), Furin(0.15), Sppl2a(0.06), Sppl3(0.05), Sec11c(0.01), Sec11a(-0.03), H13(-0.08), Spcs2(-0.12), Immp1l(-0.15), Spcs1(-0.2), Sppl2b(-0.21), Immp2l(-0.21), Cln5(-0.21),
isocitrate dehydrogenase activity	0.119489	0.229586	0.0233105	0.115508	21	0.200684	0.304634	0.583297	0.0478617	0.0501656	Akr1c21(0.92), Rdh12(0.79), Kcnab1(0.53), Kcnab2(0.37), H2-Ke6(0.27), Bdh2(-0.01), Idh2(-0.04), Ctbp1(-0.06), Hsd3b7(-0.06), Idh1(-0.08), Aifm1(-0.08), Sdr42e1(-0.08), Rdh14(-0.08), Adh5(-0.09), Rdh13(-0.14), Cbr4(-0.17), Sdr39u1(-0.25), Akr1c13(-0.27), Wwox(-0.3), Htatip2(-0.4), Hsd11b2(-0.65),
endoplasmic reticulum exit site	0.147736	0.332888	0.0235444	0.116503	10	0.398653	0.117986	0.141441	0.126957	0.216813	Apob(0.76), Sec23ip(0.04), Pdcd6ip(-0.04), Sec31a(-0.04), Sec31a(-0.04), Pdcd6(-0.07), Preb(-0.07), Mia2(-0.07), Yipf5(-0.14), Tmed5(-0.19),
Golgi to plasma membrane transport	0.152072	0.271046	0.0237437	0.117162	14	0.3427	0.276687	0.143785	0.0648487	0.196236	Chic2(0.16), Dnm2(0.05), Llgl1(0.01), Exoc1(0.01), Ccdc93(0.01), Ccdc93(0.01), Golga7(-0.01), Arfgef2(-0.01), Rab10(-0.02), Exoc2(-0.02), 9030624J02Rik(-0.08), Steap2(-0.15), Commd1(-0.2), Stxbp6(-0.25),
gluconeogenesis	0.128257	0.187793	0.0239074	0.117806	29	0.258727	0.564493	0.285612	0.0604114	0.0341729	Atf3(0.99), G6pc(0.58), G6pc(0.58), Per2(0.21), Crtc2(0.15), Atf4(0.12), Fbp1(0.12), Fbp1(0.12), Pcx(0.06), Pck1(0.05), Pck1(0.05), Gpd2(0.03), Cry1(-0.08), Pgam2(-0.08), Pgam2(-0.08), Bpgm(-0.11), Gpi1(-0.11), Pgk1(-0.11), Tpi1(-0.18), Pgam1(-0.23), Gpd1(-0.24), Gapdh(-0.29), G6pc3(-0.32), G6pc3(-0.32), Rbp4(-0.37), Rbp4(-0.37), Fbp2(-0.43), Fbp2(-0.43), Pck2(-0.59),
intrinsic apoptotic signaling pathway in response to DNA damage by p53 class mediator	0.141778	0.179495	0.024305	0.119598	33	0.0579093	0.0593123	0.356387	0.409049	0.248806	Pmaip1(0.76), Hipk2(0.42), Nupr1(0.4), Ddit4(0.4), Sirt1(0.4), Ep300(0.33), Pml(0.32), Hipk1(0.31), Trp63(0.27), Topors(0.19), Cdkn1a(0.15), Usp28(0.07), Bag6(0.06), Bcl3(0.04), Brca2(0.02), Brca2(0.02), Dyrk2(-0.01), Cdip1(-0.02), Ifi204(-0.04), Snw1(-0.04), Shisa5(-0.1), Msh2(-0.14), Pycard(-0.18), Bbc3(-0.2), Pgap2(-0.2), Tmem109(-0.26), Rps27l(-0.38), Aen(-0.48), Trp53(-0.49), Trp53(-0.49), T…
proline-rich region binding	0.174503	0.236899	0.024581	0.120788	18	0.212328	0.213925	0.295468	0.195833	0.0787642	Garem1(0.2), Abl1(0.19), Baiap2(0.16), Cyld(0.15), Yap1(0.12), Abi2(0.11), Wbp4(0.06), Baiap2l1(0.04), Cttn(0.03), Itsn1(0.03), Prpf40a(0), Ccnd1(-0.05), Tcerg1(-0.05), Apbb1(-0.11), Rabac1(-0.14), Nedd4(-0.14), Pfn1(-0.21), Csk(-0.24),
oxidoreductase activity, acting on the CH-CH group of donors, with a flavin as acceptor	0.0618677	0.364251	0.0254162	0.124547	14	0.782948	0.612514	0.147368	0.00173116	0.0716413	Acox3(0.19), Acad10(0.15), Acadsb(0.1), Ivd(0.06), Acadl(-0.05), Gcdh(-0.06), Acadvl(-0.08), Etfa(-0.08), Acad11(-0.09), Acadm(-0.13), Acad8(-0.18), Acad9(-0.19), Acox1(-0.2), Acox2(-0.21),
protein-cysteine S-palmitoyltransferase activity	0.155924	0.217398	0.0255528	0.125043	23	0.197487	0.0967335	0.135583	0.418901	0.182588	Zdhhc15(0.49), Zdhhc20(0.19), Zdhhc14(0.12), Zdhhc18(0.09), Zdhhc8(0.07), Zdhhc17(0.05), Zdhhc21(0.03), Zdhhc1(0), Zdhhc13(0), Ykt6(-0.01), Ykt6(-0.01), Golga7(-0.01), Zdhhc4(-0.01), Zdhhc24(-0.03), Zdhhc23(-0.04), Zdhhc7(-0.07), Zdhhc9(-0.08), Zdhhc5(-0.09), Zdhhc3(-0.1), Zdhhc16(-0.1), Zdhhc2(-0.14), Zdhhc6(-0.18), Zdhhc12(-0.52),
ciliary base	0.160964	0.208536	0.0259385	0.126754	21	0.0599322	0.114652	0.398838	0.178339	0.340283	Nphp3(0.19), Nek8(0.17), Ick(0.15), Ift122(0.08), Prkacb(0.05), Traf3ip1(0.05), Ift46(0.04), Tulp3(0.03), Prkaca(-0.04), Ift88(-0.05), Nphp4(-0.05), Invs(-0.07), Nphp1(-0.09), Pqbp1(-0.13), Prkar2b(-0.14), Ift52(-0.17), Rab8a(-0.18), Ift20(-0.18), Mok(-0.22), Cep126(-0.22), Cluap1(-0.35),
intra-S DNA damage checkpoint	0.145429	0.313863	0.0261156	0.12679	10	0.0977385	0.234202	0.108246	0.233822	0.35985	Oraov1(0.06), Eme2(0.06), Atf2(0.04), Rad9a(-0.01), Rad9b(-0.06), Xpc(-0.07), Mre11a(-0.08), Msh2(-0.14), Hus1(-0.17), Tipin(-0.17),
5'-nucleotidase activity	0.135496	0.238609	0.0263693	0.12679	17	0.274816	0.357968	0.0702638	0.111424	0.249406	Nt5c1a(0.72), Nt5c1a(0.72), Acpp(0.44), Nt5c2(0.13), Nt5c2(0.13), Nt5dc3(0.09), Nt5dc2(-0.05), Nt5c3b(-0.08), Nt5dc1(-0.15), Nt5c3(-0.19), Nt5c3(-0.19), Nt5e(-0.21), Nt5e(-0.21), Nt5m(-0.26), Nt5m(-0.26), Nt5c(-0.32), Nt5c(-0.32),
cellular response to amino acid starvation	0.130681	0.180879	0.0266864	0.12679	33	0.686619	0.313745	0.126641	0.0630099	0.0496285	Atf3(0.99), Eif2ak3(0.24), Ulk1(0.24), Eif2ak4(0.17), Eif2ak4(0.17), Eif2ak4(0.17), Cdkn1a(0.15), Cdkn1a(0.15), Atf4(0.12), Atf4(0.12), Gcn1l1(0.09), Impact(0.07), Rnf152(0.03), Rnf152(0.03), Eif2ak2(0.02), Rragc(0.01), Sh3glb1(0.01), Mios(0.01), Hnrnpl(-0.01), Wdr59(-0.03), Depdc5(-0.05), Depdc5(-0.05), Seh1l(-0.1), Nprl3(-0.16), Nprl3(-0.16), Rragb(-0.16), Rraga(-0.17), Nprl2(-0.22), Nprl2(-0.2…
negative regulation of mRNA splicing, via spliceosome	0.147836	0.226433	0.0267004	0.12679	25	0.320742	0.104137	0.178725	0.196864	0.20546	Celf4(0.4), Dyrk1a(0.29), Rbmxl1(0.25), Ptbp3(0.18), Sfswap(0.17), Tra2b(0.15), Acin1(0.13), Srsf4(0.13), Hnrnpa2b1(0.1), Hnrnpa2b1(0.1), Hnrnpk(0.01), Ptbp1(0), Ptbp1(0), Hnrnpl(-0.01), Pcbp4(-0.02), Srsf9(-0.04), Srsf7(-0.1), Rnps1(-0.11), Srsf10(-0.12), Srsf10(-0.12), U2af2(-0.12), Rbm10(-0.13), Srsf6(-0.17), Npm1(-0.47), C1qbp(-0.61),
C-3 sterol dehydrogenase (C-4 sterol decarboxylase) activity	0.137516	0.231665	0.0268417	0.12679	19	0.236242	0.303813	0.530863	0.0345248	0.0898522	Akr1c21(0.92), Rdh12(0.79), Kcnab1(0.53), Kcnab2(0.37), H2-Ke6(0.27), Bdh2(-0.01), Ctbp1(-0.06), Hsd3b7(-0.06), Aifm1(-0.08), Sdr42e1(-0.08), Rdh14(-0.08), Adh5(-0.09), Rdh13(-0.14), Cbr4(-0.17), Sdr39u1(-0.25), Akr1c13(-0.27), Wwox(-0.3), Htatip2(-0.4), Hsd11b2(-0.65),
mevaldate reductase activity	0.137516	0.231665	0.0268417	0.12679	19	0.236242	0.303813	0.530863	0.0345248	0.0898522	Akr1c21(0.92), Rdh12(0.79), Kcnab1(0.53), Kcnab2(0.37), H2-Ke6(0.27), Bdh2(-0.01), Ctbp1(-0.06), Hsd3b7(-0.06), Aifm1(-0.08), Sdr42e1(-0.08), Rdh14(-0.08), Adh5(-0.09), Rdh13(-0.14), Cbr4(-0.17), Sdr39u1(-0.25), Akr1c13(-0.27), Wwox(-0.3), Htatip2(-0.4), Hsd11b2(-0.65),
gluconate dehydrogenase activity	0.137516	0.231665	0.0268417	0.12679	19	0.236242	0.303813	0.530863	0.0345248	0.0898522	Akr1c21(0.92), Rdh12(0.79), Kcnab1(0.53), Kcnab2(0.37), H2-Ke6(0.27), Bdh2(-0.01), Ctbp1(-0.06), Hsd3b7(-0.06), Aifm1(-0.08), Sdr42e1(-0.08), Rdh14(-0.08), Adh5(-0.09), Rdh13(-0.14), Cbr4(-0.17), Sdr39u1(-0.25), Akr1c13(-0.27), Wwox(-0.3), Htatip2(-0.4), Hsd11b2(-0.65),
epoxide dehydrogenase activity	0.137516	0.231665	0.0268417	0.12679	19	0.236242	0.303813	0.530863	0.0345248	0.0898522	Akr1c21(0.92), Rdh12(0.79), Kcnab1(0.53), Kcnab2(0.37), H2-Ke6(0.27), Bdh2(-0.01), Ctbp1(-0.06), Hsd3b7(-0.06), Aifm1(-0.08), Sdr42e1(-0.08), Rdh14(-0.08), Adh5(-0.09), Rdh13(-0.14), Cbr4(-0.17), Sdr39u1(-0.25), Akr1c13(-0.27), Wwox(-0.3), Htatip2(-0.4), Hsd11b2(-0.65),
5-exo-hydroxycamphor dehydrogenase activity	0.137516	0.231665	0.0268417	0.12679	19	0.236242	0.303813	0.530863	0.0345248	0.0898522	Akr1c21(0.92), Rdh12(0.79), Kcnab1(0.53), Kcnab2(0.37), H2-Ke6(0.27), Bdh2(-0.01), Ctbp1(-0.06), Hsd3b7(-0.06), Aifm1(-0.08), Sdr42e1(-0.08), Rdh14(-0.08), Adh5(-0.09), Rdh13(-0.14), Cbr4(-0.17), Sdr39u1(-0.25), Akr1c13(-0.27), Wwox(-0.3), Htatip2(-0.4), Hsd11b2(-0.65),
2-hydroxytetrahydrofuran dehydrogenase activity	0.137516	0.231665	0.0268417	0.12679	19	0.236242	0.303813	0.530863	0.0345248	0.0898522	Akr1c21(0.92), Rdh12(0.79), Kcnab1(0.53), Kcnab2(0.37), H2-Ke6(0.27), Bdh2(-0.01), Ctbp1(-0.06), Hsd3b7(-0.06), Aifm1(-0.08), Sdr42e1(-0.08), Rdh14(-0.08), Adh5(-0.09), Rdh13(-0.14), Cbr4(-0.17), Sdr39u1(-0.25), Akr1c13(-0.27), Wwox(-0.3), Htatip2(-0.4), Hsd11b2(-0.65),
acetoin dehydrogenase activity	0.137516	0.231665	0.0268417	0.12679	19	0.236242	0.303813	0.530863	0.0345248	0.0898522	Akr1c21(0.92), Rdh12(0.79), Kcnab1(0.53), Kcnab2(0.37), H2-Ke6(0.27), Bdh2(-0.01), Ctbp1(-0.06), Hsd3b7(-0.06), Aifm1(-0.08), Sdr42e1(-0.08), Rdh14(-0.08), Adh5(-0.09), Rdh13(-0.14), Cbr4(-0.17), Sdr39u1(-0.25), Akr1c13(-0.27), Wwox(-0.3), Htatip2(-0.4), Hsd11b2(-0.65),
phenylcoumaran benzylic ether reductase activity	0.137516	0.231665	0.0268417	0.12679	19	0.236242	0.303813	0.530863	0.0345248	0.0898522	Akr1c21(0.92), Rdh12(0.79), Kcnab1(0.53), Kcnab2(0.37), H2-Ke6(0.27), Bdh2(-0.01), Ctbp1(-0.06), Hsd3b7(-0.06), Aifm1(-0.08), Sdr42e1(-0.08), Rdh14(-0.08), Adh5(-0.09), Rdh13(-0.14), Cbr4(-0.17), Sdr39u1(-0.25), Akr1c13(-0.27), Wwox(-0.3), Htatip2(-0.4), Hsd11b2(-0.65),
D-xylose:NADP reductase activity	0.137516	0.231665	0.0268417	0.12679	19	0.236242	0.303813	0.530863	0.0345248	0.0898522	Akr1c21(0.92), Rdh12(0.79), Kcnab1(0.53), Kcnab2(0.37), H2-Ke6(0.27), Bdh2(-0.01), Ctbp1(-0.06), Hsd3b7(-0.06), Aifm1(-0.08), Sdr42e1(-0.08), Rdh14(-0.08), Adh5(-0.09), Rdh13(-0.14), Cbr4(-0.17), Sdr39u1(-0.25), Akr1c13(-0.27), Wwox(-0.3), Htatip2(-0.4), Hsd11b2(-0.65),
L-arabinose:NADP reductase activity	0.137516	0.231665	0.0268417	0.12679	19	0.236242	0.303813	0.530863	0.0345248	0.0898522	Akr1c21(0.92), Rdh12(0.79), Kcnab1(0.53), Kcnab2(0.37), H2-Ke6(0.27), Bdh2(-0.01), Ctbp1(-0.06), Hsd3b7(-0.06), Aifm1(-0.08), Sdr42e1(-0.08), Rdh14(-0.08), Adh5(-0.09), Rdh13(-0.14), Cbr4(-0.17), Sdr39u1(-0.25), Akr1c13(-0.27), Wwox(-0.3), Htatip2(-0.4), Hsd11b2(-0.65),
D-arabinitol dehydrogenase, D-ribulose forming (NADP+) activity	0.137516	0.231665	0.0268417	0.12679	19	0.236242	0.303813	0.530863	0.0345248	0.0898522	Akr1c21(0.92), Rdh12(0.79), Kcnab1(0.53), Kcnab2(0.37), H2-Ke6(0.27), Bdh2(-0.01), Ctbp1(-0.06), Hsd3b7(-0.06), Aifm1(-0.08), Sdr42e1(-0.08), Rdh14(-0.08), Adh5(-0.09), Rdh13(-0.14), Cbr4(-0.17), Sdr39u1(-0.25), Akr1c13(-0.27), Wwox(-0.3), Htatip2(-0.4), Hsd11b2(-0.65),
steroid dehydrogenase activity, acting on the CH-OH group of donors, NAD or NADP as acceptor	0.137516	0.231665	0.0268417	0.12679	19	0.236242	0.303813	0.530863	0.0345248	0.0898522	Akr1c21(0.92), Rdh12(0.79), Kcnab1(0.53), Kcnab2(0.37), H2-Ke6(0.27), Bdh2(-0.01), Ctbp1(-0.06), Hsd3b7(-0.06), Aifm1(-0.08), Sdr42e1(-0.08), Rdh14(-0.08), Adh5(-0.09), Rdh13(-0.14), Cbr4(-0.17), Sdr39u1(-0.25), Akr1c13(-0.27), Wwox(-0.3), Htatip2(-0.4), Hsd11b2(-0.65),
steroid dehydrogenase activity, acting on the CH-CH group of donors	0.137516	0.231665	0.0268417	0.12679	19	0.236242	0.303813	0.530863	0.0345248	0.0898522	Akr1c21(0.92), Rdh12(0.79), Kcnab1(0.53), Kcnab2(0.37), H2-Ke6(0.27), Bdh2(-0.01), Ctbp1(-0.06), Hsd3b7(-0.06), Aifm1(-0.08), Sdr42e1(-0.08), Rdh14(-0.08), Adh5(-0.09), Rdh13(-0.14), Cbr4(-0.17), Sdr39u1(-0.25), Akr1c13(-0.27), Wwox(-0.3), Htatip2(-0.4), Hsd11b2(-0.65),
(R)-(-)-1,2,3,4-tetrahydronaphthol dehydrogenase activity	0.137516	0.231665	0.0268417	0.12679	19	0.236242	0.303813	0.530863	0.0345248	0.0898522	Akr1c21(0.92), Rdh12(0.79), Kcnab1(0.53), Kcnab2(0.37), H2-Ke6(0.27), Bdh2(-0.01), Ctbp1(-0.06), Hsd3b7(-0.06), Aifm1(-0.08), Sdr42e1(-0.08), Rdh14(-0.08), Adh5(-0.09), Rdh13(-0.14), Cbr4(-0.17), Sdr39u1(-0.25), Akr1c13(-0.27), Wwox(-0.3), Htatip2(-0.4), Hsd11b2(-0.65),
3-hydroxymenthone dehydrogenase activity	0.137516	0.231665	0.0268417	0.12679	19	0.236242	0.303813	0.530863	0.0345248	0.0898522	Akr1c21(0.92), Rdh12(0.79), Kcnab1(0.53), Kcnab2(0.37), H2-Ke6(0.27), Bdh2(-0.01), Ctbp1(-0.06), Hsd3b7(-0.06), Aifm1(-0.08), Sdr42e1(-0.08), Rdh14(-0.08), Adh5(-0.09), Rdh13(-0.14), Cbr4(-0.17), Sdr39u1(-0.25), Akr1c13(-0.27), Wwox(-0.3), Htatip2(-0.4), Hsd11b2(-0.65),
very long-chain-3-hydroxyacyl-CoA dehydrogenase activity	0.137516	0.231665	0.0268417	0.12679	19	0.236242	0.303813	0.530863	0.0345248	0.0898522	Akr1c21(0.92), Rdh12(0.79), Kcnab1(0.53), Kcnab2(0.37), H2-Ke6(0.27), Bdh2(-0.01), Ctbp1(-0.06), Hsd3b7(-0.06), Aifm1(-0.08), Sdr42e1(-0.08), Rdh14(-0.08), Adh5(-0.09), Rdh13(-0.14), Cbr4(-0.17), Sdr39u1(-0.25), Akr1c13(-0.27), Wwox(-0.3), Htatip2(-0.4), Hsd11b2(-0.65),
(R)-2-hydroxyisocaproate dehydrogenase activity	0.137516	0.231665	0.0268417	0.12679	19	0.236242	0.303813	0.530863	0.0345248	0.0898522	Akr1c21(0.92), Rdh12(0.79), Kcnab1(0.53), Kcnab2(0.37), H2-Ke6(0.27), Bdh2(-0.01), Ctbp1(-0.06), Hsd3b7(-0.06), Aifm1(-0.08), Sdr42e1(-0.08), Rdh14(-0.08), Adh5(-0.09), Rdh13(-0.14), Cbr4(-0.17), Sdr39u1(-0.25), Akr1c13(-0.27), Wwox(-0.3), Htatip2(-0.4), Hsd11b2(-0.65),
L-arabinose 1-dehydrogenase (NADP+) activity	0.137516	0.231665	0.0268417	0.12679	19	0.236242	0.303813	0.530863	0.0345248	0.0898522	Akr1c21(0.92), Rdh12(0.79), Kcnab1(0.53), Kcnab2(0.37), H2-Ke6(0.27), Bdh2(-0.01), Ctbp1(-0.06), Hsd3b7(-0.06), Aifm1(-0.08), Sdr42e1(-0.08), Rdh14(-0.08), Adh5(-0.09), Rdh13(-0.14), Cbr4(-0.17), Sdr39u1(-0.25), Akr1c13(-0.27), Wwox(-0.3), Htatip2(-0.4), Hsd11b2(-0.65),
L-xylulose reductase (NAD+) activity	0.137516	0.231665	0.0268417	0.12679	19	0.236242	0.303813	0.530863	0.0345248	0.0898522	Akr1c21(0.92), Rdh12(0.79), Kcnab1(0.53), Kcnab2(0.37), H2-Ke6(0.27), Bdh2(-0.01), Ctbp1(-0.06), Hsd3b7(-0.06), Aifm1(-0.08), Sdr42e1(-0.08), Rdh14(-0.08), Adh5(-0.09), Rdh13(-0.14), Cbr4(-0.17), Sdr39u1(-0.25), Akr1c13(-0.27), Wwox(-0.3), Htatip2(-0.4), Hsd11b2(-0.65),
3-ketoglucose-reductase activity	0.137516	0.231665	0.0268417	0.12679	19	0.236242	0.303813	0.530863	0.0345248	0.0898522	Akr1c21(0.92), Rdh12(0.79), Kcnab1(0.53), Kcnab2(0.37), H2-Ke6(0.27), Bdh2(-0.01), Ctbp1(-0.06), Hsd3b7(-0.06), Aifm1(-0.08), Sdr42e1(-0.08), Rdh14(-0.08), Adh5(-0.09), Rdh13(-0.14), Cbr4(-0.17), Sdr39u1(-0.25), Akr1c13(-0.27), Wwox(-0.3), Htatip2(-0.4), Hsd11b2(-0.65),
D-arabinitol dehydrogenase, D-xylulose forming (NADP+) activity	0.137516	0.231665	0.0268417	0.12679	19	0.236242	0.303813	0.530863	0.0345248	0.0898522	Akr1c21(0.92), Rdh12(0.79), Kcnab1(0.53), Kcnab2(0.37), H2-Ke6(0.27), Bdh2(-0.01), Ctbp1(-0.06), Hsd3b7(-0.06), Aifm1(-0.08), Sdr42e1(-0.08), Rdh14(-0.08), Adh5(-0.09), Rdh13(-0.14), Cbr4(-0.17), Sdr39u1(-0.25), Akr1c13(-0.27), Wwox(-0.3), Htatip2(-0.4), Hsd11b2(-0.65),
regulation of mitochondrion organization	0.140971	0.329177	0.0282834	0.133245	11	0.39714	0.329484	0.0634371	0.324057	0.0572416	Golph3(0.1), Pink1(0.06), Dnm1l(0.01), Dnm1l(0.01), Park2(-0.02), Park2(-0.02), Atp13a2(-0.05), Atp13a2(-0.05), Bnip3(-0.09), Mul1(-0.12), Fis1(-0.14),
hydrolase activity, acting on ester bonds	0.098873	0.224633	0.0292808	0.137603	25	0.503125	0.538047	0.14036	0.0471609	0.0569303	Endou(0.45), Aspa(0.38), Acy3(0.21), Ercc5(0.2), Pgap1(0.17), Fen1(0.16), Lipe(0.12), Fasn(0.07), Tatdn3(0.04), 4931406C07Rik(-0.03), Pgap3(-0.03), Faah(-0.05), Aoah(-0.06), Apmap(-0.1), Dbr1(-0.11), Pter(-0.16), Lipa(-0.17), Fan1(-0.17), Nt5e(-0.21), Dtd2(-0.21), Tatdn1(-0.28), Esd(-0.29), Esd(-0.29), Dtd1(-0.31), Rexo2(-0.37),
myristoyltransferase activity	0.100839	0.203967	0.0292864	0.137603	27	0.442654	0.459154	0.0438495	0.0380781	0.30806	Mboat1(0.56), Nat14(0.33), Nat8f1(0.31), Lpgat1(0.28), Porcn(0.18), Mboat2(0.17), Hhat(0.05), Nat8(0.04), Esco1(0.02), Mboat7(0.01), Pla2g15(0.01), Ykt6(-0.01), Lpcat3(-0.03), Nat6(-0.06), Nmt1(-0.09), Lclat1(-0.09), Naa40(-0.1), Nat10(-0.18), Naa50(-0.22), Nat8f2(-0.25), Nat9(-0.28), Naa10(-0.44), Acnat2(-0.46), Nat8f5(-0.49), Acnat1(-0.5), Lipt1(-0.5), Ciita(-0.55),
oligosaccharyl transferase activity	0.131647	0.142197	0.0296329	0.139047	49	0.0136678	0.0951816	0.210141	0.687929	0.349909	B3galt1(0.56), Galnt15(0.51), Galnt16(0.48), Wbscr17(0.22), B4galt1(0.18), Galnt12(0.17), B4galt3(0.15), B3gnt3(0.13), Fut9(0.11), B4galt4(0.11), B3gnt7(0.11), B4galt2(0.07), Dpy19l4(0.07), B3galt2(0.06), B3gnt9(0.06), Dpy19l3(0.05), Pigv(0.04), Galnt10(0.02), B4galt5(0.01), Uggt1(0.01), Dpy19l1(0), B3glct(0), Fut4(-0.01), Pigm(-0.02), Galnt14(-0.04), Glt8d1(-0.04), B3gnt2(-0.05), Stt3a(-0.06), F…
protein geranylgeranylation	0.168824	0.309375	0.0298632	0.139942	10	0.334128	0.0926658	0.227123	0.177118	0.217029	Chml(0.13), Pggt1b(0.11), Pggt1b(0.11), Rabggtb(-0.03), Rabggtb(-0.03), Chm(-0.04), Fnta(-0.14), Fnta(-0.14), Rabggta(-0.26), Rabggta(-0.26),
double-stranded telomeric DNA binding	0.150155	0.3052	0.0300972	0.140549	10	0.0946501	0.153484	0.192191	0.123108	0.564073	Hmbox1(0.21), Pura(0.15), Terf1(-0.01), Terf1(-0.01), Rad50(-0.02), Terf2(-0.02), Terf2(-0.02), Xrcc5(-0.18), Xrcc6(-0.37), Apex1(-0.61),
cellular metabolic process	0.152937	0.270043	0.0301156	0.140549	12	0.50471	0.390171	0.132568	0.0828633	0.0757403	Mtr(0.28), Blm(0.12), Wnt7b(0.04), Exosc10(0), Wrn(-0.04), Crcp(-0.07), Ftcd(-0.1), Polr2d(-0.15), Eif2b2(-0.19), Eif2b4(-0.22), Eif2b1(-0.3), Mri1(-0.5),
cell separation after cytokinesis	0.179675	0.25474	0.0301915	0.140549	14	0.475872	0.18231	0.131337	0.176402	0.118417	Chmp4c(0.3), Vps4b(0.09), Mitd1(0.07), Chmp4b(0.07), Chmp2a(-0.01), Pdcd6ip(-0.04), Chmp3(-0.04), Chmp7(-0.05), Chmp5(-0.08), Vps4a(-0.09), Chmp1a(-0.12), Chmp2b(-0.14), Kif20a(-0.16), Chmp6(-0.29),
smoothened signaling pathway	0.125231	0.130206	0.0306964	0.142712	67	0.035298	0.269897	0.404957	0.144883	0.321844	Foxf1(0.56), Gli3(0.43), Hipk2(0.42), Stil(0.39), Ttbk2(0.33), Hipk1(0.31), Boc(0.25), Ptpdc1(0.22), Trove2(0.19), Ndst1(0.18), Cdon(0.18), Cdon(0.18), Evc(0.18), Arl13b(0.17), Ptch1(0.15), Ptch1(0.15), Tgfbr2(0.14), Hes1(0.12), Tctn3(0.06), Ift172(0.06), Wdpcp(0.05), Hhat(0.05), Cc2d2a(0.05), Ift46(0.04), Ift57(0.03), Kif3a(0.02), Tbc1d32(0.02), Nsdhl(0.01), Evc2(0.01), Dzip1(0), Wdr19(0), Dyrk2…
histone deacetylase activity	0.177971	0.19272	0.0317277	0.147124	31	0.41719	0.389191	0.0880929	0.0901666	0.166704	Sirt1(0.4), Hdac4(0.27), Hdac5(0.22), Hdac5(0.22), Hdac7(0.2), Sin3b(0.14), Hdac1(0.09), Hdac1(0.09), Mta2(0.07), Sin3a(0.06), Hdac6(0.02), Hdac6(0.02), Atxn3(0.01), Nacc2(-0.02), Brms1(-0.02), Hdac3(-0.03), Hdac3(-0.03), Sall1(-0.04), Brms1l(-0.05), Sirt2(-0.08), Sirt2(-0.08), Hdac2(-0.09), Hdac2(-0.09), Hdac2(-0.09), Hdac8(-0.1), Hdac10(-0.21), Suds3(-0.22), Suds3(-0.22), Hdac11(-0.22), Hdac11(…
sulfate transport	0.109314	0.306837	0.0317286	0.147124	13	0.744452	0.270567	0.502458	0.0255776	0.0121578	Slc26a4(0.78), Slc26a7(0.13), Slc26a2(0.12), Slc26a11(0.05), Racgap1(0), Slc26a6(-0.08), Slc26a6(-0.08), Slc26a6(-0.08), Slc25a10(-0.14), Slc26a1(-0.23), Slc26a1(-0.23), Slc13a1(-0.58), Slc13a1(-0.58),
nucleosome disassembly	0.156449	0.280242	0.0329882	0.152366	13	0.0540678	0.415541	0.210114	0.103861	0.410846	Arid1a(0.31), Cebpg(0.14), Arid2(0.12), Smarcc2(0.06), Smarca4(-0.04), Smarcd1(-0.04), Smarcd3(-0.05), Smarce1(-0.08), Smarcd2(-0.1), Hist3h2a(-0.11), Smarcc1(-0.15), Smarcb1(-0.21), Smarcb1(-0.21),
mRNA cap binding complex	0.192085	0.302472	0.0330936	0.152653	11	0.223637	0.212236	0.13109	0.292783	0.188666	Ago2(0.33), Fam103a1(0.14), Fmr1(0.07), Cyfip1(0.01), Ncbp2(-0.05), Ncbp1(-0.1), Eif4e(-0.11), Eif4e(-0.11), Eif4e2(-0.12), Rnmt(-0.15), Rnmt(-0.15),
carboxy-lyase activity	0.150629	0.217818	0.0331524	0.152726	19	0.386484	0.255709	0.424846	0.0554576	0.0841807	Hdc(0.84), Acmsd(0.61), Mvd(0.17), Sgpl1(0.08), Pck1(0.05), Pdxdc1(0.04), Csad(0), Ddc(-0.05), Pisd(-0.07), Paics(-0.13), Uxs1(-0.13), Ppcdc(-0.15), Odc1(-0.18), Echdc1(-0.21), Amd1(-0.22), Urod(-0.23), Mlycd(-0.3), Umps(-0.39), Pck2(-0.59),
chromatin remodeling	0.157188	0.117989	0.0332435	0.152797	79	0.184898	0.280073	0.117451	0.379276	0.129496	Chd7(0.59), Smarca2(0.37), Bptf(0.37), Rsf1(0.35), Smarca1(0.33), Arid1a(0.31), Atrx(0.29), Trp63(0.27), Hdac4(0.27), Mysm1(0.25), Chd1(0.23), Baz2a(0.21), Nr3c1(0.19), Baz1a(0.19), Gata3(0.18), Gata3(0.18), Ttf1(0.15), Baz1b(0.15), Cebpg(0.14), Satb1(0.14), Scmh1(0.14), Top1(0.13), Top1(0.13), Kat2b(0.12), Rere(0.12), Dek(0.12), Smarca5(0.1), Smarca5(0.1), Smarca5(0.1), Actr6(0.08), Ino80(0.08),…
Ras palmitoyltransferase activity	0.0947013	0.206478	0.0332543	0.152797	27	0.423077	0.520371	0.0403951	0.0380781	0.329736	Mboat1(0.56), Nat14(0.33), Nat8f1(0.31), Lpgat1(0.28), Porcn(0.18), Mboat2(0.17), Hhat(0.05), Nat8(0.04), Esco1(0.02), Mboat7(0.01), Pla2g15(0.01), Ykt6(-0.01), Lpcat3(-0.03), Nat6(-0.06), Zdhhc9(-0.08), Lclat1(-0.09), Naa40(-0.1), Nat10(-0.18), Naa50(-0.22), Nat8f2(-0.25), Nat9(-0.28), Naa10(-0.44), Acnat2(-0.46), Nat8f5(-0.49), Acnat1(-0.5), Lipt1(-0.5), Ciita(-0.55),
ferrous iron binding	0.132515	0.211916	0.0334511	0.153502	21	0.355068	0.332195	0.266435	0.0722337	0.11339	Trf(0.61), Heph(0.38), Tet2(0.32), Cdo1(0.24), Alkbh8(0.04), Snca(-0.02), Iscu(-0.05), Isca1(-0.05), Haao(-0.08), Plod1(-0.09), 6430573F11Rik(-0.1), Alkbh6(-0.12), Fto(-0.14), Alkbh2(-0.16), Alkbh1(-0.18), Alkbh3(-0.2), Nt5e(-0.21), Fxn(-0.22), Isca2(-0.22), Urod(-0.23), Dnajc24(-0.23),
positive regulation of fatty acid biosynthetic process	0.140353	0.299714	0.0343831	0.153683	12	0.445283	0.445691	0.24662	0.0630839	0.0569571	Srebf1(0.09), Mid1ip1(0.05), Mlxipl(0.03), Slc45a3(0.02), Nr1h2(-0.01), Hnf4a(-0.1), Rgn(-0.16), Apoa4(-0.26), Apoa4(-0.26), Nr1h3(-0.27), Apoa1(-0.5), Agt(-0.75),
oxaloacetate metabolic process	0.101965	0.315334	0.0346543	0.153683	14	0.76333	0.5353	0.189742	0.0100526	0.0480532	Stat5a(0.1), Stat5b(0.07), Pcx(0.06), Pck1(0.05), Nit2(0.05), Mdh1(0.01), Mdh1(0.01), Got1(-0.02), Cs(-0.09), Ghr(-0.09), Mdh2(-0.09), Got2(-0.11), Acly(-0.13), Pck2(-0.59),
dihydrolipoamide branched chain acyltransferase activity	0.109601	0.205424	0.0354453	0.153683	26	0.410458	0.474201	0.0461251	0.0541493	0.323432	Mboat1(0.56), Nat14(0.33), Nat8f1(0.31), Lpgat1(0.28), Porcn(0.18), Mboat2(0.17), Hhat(0.05), Nat8(0.04), Esco1(0.02), Mboat7(0.01), Pla2g15(0.01), Ykt6(-0.01), Lpcat3(-0.03), Nat6(-0.06), Lclat1(-0.09), Naa40(-0.1), Nat10(-0.18), Naa50(-0.22), Nat8f2(-0.25), Nat9(-0.28), Naa10(-0.44), Acnat2(-0.46), Nat8f5(-0.49), Acnat1(-0.5), Lipt1(-0.5), Ciita(-0.55),
palmitoleoyl [acyl-carrier-protein]-dependent acyltransferase activity	0.109601	0.205424	0.0354453	0.153683	26	0.410458	0.474201	0.0461251	0.0541493	0.323432	Mboat1(0.56), Nat14(0.33), Nat8f1(0.31), Lpgat1(0.28), Porcn(0.18), Mboat2(0.17), Hhat(0.05), Nat8(0.04), Esco1(0.02), Mboat7(0.01), Pla2g15(0.01), Ykt6(-0.01), Lpcat3(-0.03), Nat6(-0.06), Lclat1(-0.09), Naa40(-0.1), Nat10(-0.18), Naa50(-0.22), Nat8f2(-0.25), Nat9(-0.28), Naa10(-0.44), Acnat2(-0.46), Nat8f5(-0.49), Acnat1(-0.5), Lipt1(-0.5), Ciita(-0.55),
carnitine O-acyltransferase activity	0.109601	0.205424	0.0354453	0.153683	26	0.410458	0.474201	0.0461251	0.0541493	0.323432	Mboat1(0.56), Nat14(0.33), Nat8f1(0.31), Lpgat1(0.28), Porcn(0.18), Mboat2(0.17), Hhat(0.05), Nat8(0.04), Esco1(0.02), Mboat7(0.01), Pla2g15(0.01), Ykt6(-0.01), Lpcat3(-0.03), Nat6(-0.06), Lclat1(-0.09), Naa40(-0.1), Nat10(-0.18), Naa50(-0.22), Nat8f2(-0.25), Nat9(-0.28), Naa10(-0.44), Acnat2(-0.46), Nat8f5(-0.49), Acnat1(-0.5), Lipt1(-0.5), Ciita(-0.55),
C-acyltransferase activity	0.109601	0.205424	0.0354453	0.153683	26	0.410458	0.474201	0.0461251	0.0541493	0.323432	Mboat1(0.56), Nat14(0.33), Nat8f1(0.31), Lpgat1(0.28), Porcn(0.18), Mboat2(0.17), Hhat(0.05), Nat8(0.04), Esco1(0.02), Mboat7(0.01), Pla2g15(0.01), Ykt6(-0.01), Lpcat3(-0.03), Nat6(-0.06), Lclat1(-0.09), Naa40(-0.1), Nat10(-0.18), Naa50(-0.22), Nat8f2(-0.25), Nat9(-0.28), Naa10(-0.44), Acnat2(-0.46), Nat8f5(-0.49), Acnat1(-0.5), Lipt1(-0.5), Ciita(-0.55),
acylglycerol O-acyltransferase activity	0.109601	0.205424	0.0354453	0.153683	26	0.410458	0.474201	0.0461251	0.0541493	0.323432	Mboat1(0.56), Nat14(0.33), Nat8f1(0.31), Lpgat1(0.28), Porcn(0.18), Mboat2(0.17), Hhat(0.05), Nat8(0.04), Esco1(0.02), Mboat7(0.01), Pla2g15(0.01), Ykt6(-0.01), Lpcat3(-0.03), Nat6(-0.06), Lclat1(-0.09), Naa40(-0.1), Nat10(-0.18), Naa50(-0.22), Nat8f2(-0.25), Nat9(-0.28), Naa10(-0.44), Acnat2(-0.46), Nat8f5(-0.49), Acnat1(-0.5), Lipt1(-0.5), Ciita(-0.55),
serine O-acyltransferase activity	0.109601	0.205424	0.0354453	0.153683	26	0.410458	0.474201	0.0461251	0.0541493	0.323432	Mboat1(0.56), Nat14(0.33), Nat8f1(0.31), Lpgat1(0.28), Porcn(0.18), Mboat2(0.17), Hhat(0.05), Nat8(0.04), Esco1(0.02), Mboat7(0.01), Pla2g15(0.01), Ykt6(-0.01), Lpcat3(-0.03), Nat6(-0.06), Lclat1(-0.09), Naa40(-0.1), Nat10(-0.18), Naa50(-0.22), Nat8f2(-0.25), Nat9(-0.28), Naa10(-0.44), Acnat2(-0.46), Nat8f5(-0.49), Acnat1(-0.5), Lipt1(-0.5), Ciita(-0.55),
O-acetyltransferase activity	0.109601	0.205424	0.0354453	0.153683	26	0.410458	0.474201	0.0461251	0.0541493	0.323432	Mboat1(0.56), Nat14(0.33), Nat8f1(0.31), Lpgat1(0.28), Porcn(0.18), Mboat2(0.17), Hhat(0.05), Nat8(0.04), Esco1(0.02), Mboat7(0.01), Pla2g15(0.01), Ykt6(-0.01), Lpcat3(-0.03), Nat6(-0.06), Lclat1(-0.09), Naa40(-0.1), Nat10(-0.18), Naa50(-0.22), Nat8f2(-0.25), Nat9(-0.28), Naa10(-0.44), Acnat2(-0.46), Nat8f5(-0.49), Acnat1(-0.5), Lipt1(-0.5), Ciita(-0.55),
O-octanoyltransferase activity	0.109601	0.205424	0.0354453	0.153683	26	0.410458	0.474201	0.0461251	0.0541493	0.323432	Mboat1(0.56), Nat14(0.33), Nat8f1(0.31), Lpgat1(0.28), Porcn(0.18), Mboat2(0.17), Hhat(0.05), Nat8(0.04), Esco1(0.02), Mboat7(0.01), Pla2g15(0.01), Ykt6(-0.01), Lpcat3(-0.03), Nat6(-0.06), Lclat1(-0.09), Naa40(-0.1), Nat10(-0.18), Naa50(-0.22), Nat8f2(-0.25), Nat9(-0.28), Naa10(-0.44), Acnat2(-0.46), Nat8f5(-0.49), Acnat1(-0.5), Lipt1(-0.5), Ciita(-0.55),
O-palmitoyltransferase activity	0.109601	0.205424	0.0354453	0.153683	26	0.410458	0.474201	0.0461251	0.0541493	0.323432	Mboat1(0.56), Nat14(0.33), Nat8f1(0.31), Lpgat1(0.28), Porcn(0.18), Mboat2(0.17), Hhat(0.05), Nat8(0.04), Esco1(0.02), Mboat7(0.01), Pla2g15(0.01), Ykt6(-0.01), Lpcat3(-0.03), Nat6(-0.06), Lclat1(-0.09), Naa40(-0.1), Nat10(-0.18), Naa50(-0.22), Nat8f2(-0.25), Nat9(-0.28), Naa10(-0.44), Acnat2(-0.46), Nat8f5(-0.49), Acnat1(-0.5), Lipt1(-0.5), Ciita(-0.55),
S-acyltransferase activity	0.109601	0.205424	0.0354453	0.153683	26	0.410458	0.474201	0.0461251	0.0541493	0.323432	Mboat1(0.56), Nat14(0.33), Nat8f1(0.31), Lpgat1(0.28), Porcn(0.18), Mboat2(0.17), Hhat(0.05), Nat8(0.04), Esco1(0.02), Mboat7(0.01), Pla2g15(0.01), Ykt6(-0.01), Lpcat3(-0.03), Nat6(-0.06), Lclat1(-0.09), Naa40(-0.1), Nat10(-0.18), Naa50(-0.22), Nat8f2(-0.25), Nat9(-0.28), Naa10(-0.44), Acnat2(-0.46), Nat8f5(-0.49), Acnat1(-0.5), Lipt1(-0.5), Ciita(-0.55),
S-acetyltransferase activity	0.109601	0.205424	0.0354453	0.153683	26	0.410458	0.474201	0.0461251	0.0541493	0.323432	Mboat1(0.56), Nat14(0.33), Nat8f1(0.31), Lpgat1(0.28), Porcn(0.18), Mboat2(0.17), Hhat(0.05), Nat8(0.04), Esco1(0.02), Mboat7(0.01), Pla2g15(0.01), Ykt6(-0.01), Lpcat3(-0.03), Nat6(-0.06), Lclat1(-0.09), Naa40(-0.1), Nat10(-0.18), Naa50(-0.22), Nat8f2(-0.25), Nat9(-0.28), Naa10(-0.44), Acnat2(-0.46), Nat8f5(-0.49), Acnat1(-0.5), Lipt1(-0.5), Ciita(-0.55),
S-malonyltransferase activity	0.109601	0.205424	0.0354453	0.153683	26	0.410458	0.474201	0.0461251	0.0541493	0.323432	Mboat1(0.56), Nat14(0.33), Nat8f1(0.31), Lpgat1(0.28), Porcn(0.18), Mboat2(0.17), Hhat(0.05), Nat8(0.04), Esco1(0.02), Mboat7(0.01), Pla2g15(0.01), Ykt6(-0.01), Lpcat3(-0.03), Nat6(-0.06), Lclat1(-0.09), Naa40(-0.1), Nat10(-0.18), Naa50(-0.22), Nat8f2(-0.25), Nat9(-0.28), Naa10(-0.44), Acnat2(-0.46), Nat8f5(-0.49), Acnat1(-0.5), Lipt1(-0.5), Ciita(-0.55),
malonyltransferase activity	0.109601	0.205424	0.0354453	0.153683	26	0.410458	0.474201	0.0461251	0.0541493	0.323432	Mboat1(0.56), Nat14(0.33), Nat8f1(0.31), Lpgat1(0.28), Porcn(0.18), Mboat2(0.17), Hhat(0.05), Nat8(0.04), Esco1(0.02), Mboat7(0.01), Pla2g15(0.01), Ykt6(-0.01), Lpcat3(-0.03), Nat6(-0.06), Lclat1(-0.09), Naa40(-0.1), Nat10(-0.18), Naa50(-0.22), Nat8f2(-0.25), Nat9(-0.28), Naa10(-0.44), Acnat2(-0.46), Nat8f5(-0.49), Acnat1(-0.5), Lipt1(-0.5), Ciita(-0.55),
C-palmitoyltransferase activity	0.109601	0.205424	0.0354453	0.153683	26	0.410458	0.474201	0.0461251	0.0541493	0.323432	Mboat1(0.56), Nat14(0.33), Nat8f1(0.31), Lpgat1(0.28), Porcn(0.18), Mboat2(0.17), Hhat(0.05), Nat8(0.04), Esco1(0.02), Mboat7(0.01), Pla2g15(0.01), Ykt6(-0.01), Lpcat3(-0.03), Nat6(-0.06), Lclat1(-0.09), Naa40(-0.1), Nat10(-0.18), Naa50(-0.22), Nat8f2(-0.25), Nat9(-0.28), Naa10(-0.44), Acnat2(-0.46), Nat8f5(-0.49), Acnat1(-0.5), Lipt1(-0.5), Ciita(-0.55),
succinyltransferase activity	0.109601	0.205424	0.0354453	0.153683	26	0.410458	0.474201	0.0461251	0.0541493	0.323432	Mboat1(0.56), Nat14(0.33), Nat8f1(0.31), Lpgat1(0.28), Porcn(0.18), Mboat2(0.17), Hhat(0.05), Nat8(0.04), Esco1(0.02), Mboat7(0.01), Pla2g15(0.01), Ykt6(-0.01), Lpcat3(-0.03), Nat6(-0.06), Lclat1(-0.09), Naa40(-0.1), Nat10(-0.18), Naa50(-0.22), Nat8f2(-0.25), Nat9(-0.28), Naa10(-0.44), Acnat2(-0.46), Nat8f5(-0.49), Acnat1(-0.5), Lipt1(-0.5), Ciita(-0.55),
N-succinyltransferase activity	0.109601	0.205424	0.0354453	0.153683	26	0.410458	0.474201	0.0461251	0.0541493	0.323432	Mboat1(0.56), Nat14(0.33), Nat8f1(0.31), Lpgat1(0.28), Porcn(0.18), Mboat2(0.17), Hhat(0.05), Nat8(0.04), Esco1(0.02), Mboat7(0.01), Pla2g15(0.01), Ykt6(-0.01), Lpcat3(-0.03), Nat6(-0.06), Lclat1(-0.09), Naa40(-0.1), Nat10(-0.18), Naa50(-0.22), Nat8f2(-0.25), Nat9(-0.28), Naa10(-0.44), Acnat2(-0.46), Nat8f5(-0.49), Acnat1(-0.5), Lipt1(-0.5), Ciita(-0.55),
O-succinyltransferase activity	0.109601	0.205424	0.0354453	0.153683	26	0.410458	0.474201	0.0461251	0.0541493	0.323432	Mboat1(0.56), Nat14(0.33), Nat8f1(0.31), Lpgat1(0.28), Porcn(0.18), Mboat2(0.17), Hhat(0.05), Nat8(0.04), Esco1(0.02), Mboat7(0.01), Pla2g15(0.01), Ykt6(-0.01), Lpcat3(-0.03), Nat6(-0.06), Lclat1(-0.09), Naa40(-0.1), Nat10(-0.18), Naa50(-0.22), Nat8f2(-0.25), Nat9(-0.28), Naa10(-0.44), Acnat2(-0.46), Nat8f5(-0.49), Acnat1(-0.5), Lipt1(-0.5), Ciita(-0.55),
S-succinyltransferase activity	0.109601	0.205424	0.0354453	0.153683	26	0.410458	0.474201	0.0461251	0.0541493	0.323432	Mboat1(0.56), Nat14(0.33), Nat8f1(0.31), Lpgat1(0.28), Porcn(0.18), Mboat2(0.17), Hhat(0.05), Nat8(0.04), Esco1(0.02), Mboat7(0.01), Pla2g15(0.01), Ykt6(-0.01), Lpcat3(-0.03), Nat6(-0.06), Lclat1(-0.09), Naa40(-0.1), Nat10(-0.18), Naa50(-0.22), Nat8f2(-0.25), Nat9(-0.28), Naa10(-0.44), Acnat2(-0.46), Nat8f5(-0.49), Acnat1(-0.5), Lipt1(-0.5), Ciita(-0.55),
sinapoyltransferase activity	0.109601	0.205424	0.0354453	0.153683	26	0.410458	0.474201	0.0461251	0.0541493	0.323432	Mboat1(0.56), Nat14(0.33), Nat8f1(0.31), Lpgat1(0.28), Porcn(0.18), Mboat2(0.17), Hhat(0.05), Nat8(0.04), Esco1(0.02), Mboat7(0.01), Pla2g15(0.01), Ykt6(-0.01), Lpcat3(-0.03), Nat6(-0.06), Lclat1(-0.09), Naa40(-0.1), Nat10(-0.18), Naa50(-0.22), Nat8f2(-0.25), Nat9(-0.28), Naa10(-0.44), Acnat2(-0.46), Nat8f5(-0.49), Acnat1(-0.5), Lipt1(-0.5), Ciita(-0.55),
O-sinapoyltransferase activity	0.109601	0.205424	0.0354453	0.153683	26	0.410458	0.474201	0.0461251	0.0541493	0.323432	Mboat1(0.56), Nat14(0.33), Nat8f1(0.31), Lpgat1(0.28), Porcn(0.18), Mboat2(0.17), Hhat(0.05), Nat8(0.04), Esco1(0.02), Mboat7(0.01), Pla2g15(0.01), Ykt6(-0.01), Lpcat3(-0.03), Nat6(-0.06), Lclat1(-0.09), Naa40(-0.1), Nat10(-0.18), Naa50(-0.22), Nat8f2(-0.25), Nat9(-0.28), Naa10(-0.44), Acnat2(-0.46), Nat8f5(-0.49), Acnat1(-0.5), Lipt1(-0.5), Ciita(-0.55),
peptidyl-lysine N6-myristoyltransferase activity	0.109601	0.205424	0.0354453	0.153683	26	0.410458	0.474201	0.0461251	0.0541493	0.323432	Mboat1(0.56), Nat14(0.33), Nat8f1(0.31), Lpgat1(0.28), Porcn(0.18), Mboat2(0.17), Hhat(0.05), Nat8(0.04), Esco1(0.02), Mboat7(0.01), Pla2g15(0.01), Ykt6(-0.01), Lpcat3(-0.03), Nat6(-0.06), Lclat1(-0.09), Naa40(-0.1), Nat10(-0.18), Naa50(-0.22), Nat8f2(-0.25), Nat9(-0.28), Naa10(-0.44), Acnat2(-0.46), Nat8f5(-0.49), Acnat1(-0.5), Lipt1(-0.5), Ciita(-0.55),
peptidyl-lysine N6-palmitoyltransferase activity	0.109601	0.205424	0.0354453	0.153683	26	0.410458	0.474201	0.0461251	0.0541493	0.323432	Mboat1(0.56), Nat14(0.33), Nat8f1(0.31), Lpgat1(0.28), Porcn(0.18), Mboat2(0.17), Hhat(0.05), Nat8(0.04), Esco1(0.02), Mboat7(0.01), Pla2g15(0.01), Ykt6(-0.01), Lpcat3(-0.03), Nat6(-0.06), Lclat1(-0.09), Naa40(-0.1), Nat10(-0.18), Naa50(-0.22), Nat8f2(-0.25), Nat9(-0.28), Naa10(-0.44), Acnat2(-0.46), Nat8f5(-0.49), Acnat1(-0.5), Lipt1(-0.5), Ciita(-0.55),
benzoyl acetate-CoA thiolase activity	0.109601	0.205424	0.0354453	0.153683	26	0.410458	0.474201	0.0461251	0.0541493	0.323432	Mboat1(0.56), Nat14(0.33), Nat8f1(0.31), Lpgat1(0.28), Porcn(0.18), Mboat2(0.17), Hhat(0.05), Nat8(0.04), Esco1(0.02), Mboat7(0.01), Pla2g15(0.01), Ykt6(-0.01), Lpcat3(-0.03), Nat6(-0.06), Lclat1(-0.09), Naa40(-0.1), Nat10(-0.18), Naa50(-0.22), Nat8f2(-0.25), Nat9(-0.28), Naa10(-0.44), Acnat2(-0.46), Nat8f5(-0.49), Acnat1(-0.5), Lipt1(-0.5), Ciita(-0.55),
3-hydroxybutyryl-CoA thiolase activity	0.109601	0.205424	0.0354453	0.153683	26	0.410458	0.474201	0.0461251	0.0541493	0.323432	Mboat1(0.56), Nat14(0.33), Nat8f1(0.31), Lpgat1(0.28), Porcn(0.18), Mboat2(0.17), Hhat(0.05), Nat8(0.04), Esco1(0.02), Mboat7(0.01), Pla2g15(0.01), Ykt6(-0.01), Lpcat3(-0.03), Nat6(-0.06), Lclat1(-0.09), Naa40(-0.1), Nat10(-0.18), Naa50(-0.22), Nat8f2(-0.25), Nat9(-0.28), Naa10(-0.44), Acnat2(-0.46), Nat8f5(-0.49), Acnat1(-0.5), Lipt1(-0.5), Ciita(-0.55),
3-ketopimelyl-CoA thiolase activity	0.109601	0.205424	0.0354453	0.153683	26	0.410458	0.474201	0.0461251	0.0541493	0.323432	Mboat1(0.56), Nat14(0.33), Nat8f1(0.31), Lpgat1(0.28), Porcn(0.18), Mboat2(0.17), Hhat(0.05), Nat8(0.04), Esco1(0.02), Mboat7(0.01), Pla2g15(0.01), Ykt6(-0.01), Lpcat3(-0.03), Nat6(-0.06), Lclat1(-0.09), Naa40(-0.1), Nat10(-0.18), Naa50(-0.22), Nat8f2(-0.25), Nat9(-0.28), Naa10(-0.44), Acnat2(-0.46), Nat8f5(-0.49), Acnat1(-0.5), Lipt1(-0.5), Ciita(-0.55),
N-palmitoyltransferase activity	0.109601	0.205424	0.0354453	0.153683	26	0.410458	0.474201	0.0461251	0.0541493	0.323432	Mboat1(0.56), Nat14(0.33), Nat8f1(0.31), Lpgat1(0.28), Porcn(0.18), Mboat2(0.17), Hhat(0.05), Nat8(0.04), Esco1(0.02), Mboat7(0.01), Pla2g15(0.01), Ykt6(-0.01), Lpcat3(-0.03), Nat6(-0.06), Lclat1(-0.09), Naa40(-0.1), Nat10(-0.18), Naa50(-0.22), Nat8f2(-0.25), Nat9(-0.28), Naa10(-0.44), Acnat2(-0.46), Nat8f5(-0.49), Acnat1(-0.5), Lipt1(-0.5), Ciita(-0.55),
acyl-CoA N-acyltransferase activity	0.109601	0.205424	0.0354453	0.153683	26	0.410458	0.474201	0.0461251	0.0541493	0.323432	Mboat1(0.56), Nat14(0.33), Nat8f1(0.31), Lpgat1(0.28), Porcn(0.18), Mboat2(0.17), Hhat(0.05), Nat8(0.04), Esco1(0.02), Mboat7(0.01), Pla2g15(0.01), Ykt6(-0.01), Lpcat3(-0.03), Nat6(-0.06), Lclat1(-0.09), Naa40(-0.1), Nat10(-0.18), Naa50(-0.22), Nat8f2(-0.25), Nat9(-0.28), Naa10(-0.44), Acnat2(-0.46), Nat8f5(-0.49), Acnat1(-0.5), Lipt1(-0.5), Ciita(-0.55),
protein-cysteine S-myristoyltransferase activity	0.109601	0.205424	0.0354453	0.153683	26	0.410458	0.474201	0.0461251	0.0541493	0.323432	Mboat1(0.56), Nat14(0.33), Nat8f1(0.31), Lpgat1(0.28), Porcn(0.18), Mboat2(0.17), Hhat(0.05), Nat8(0.04), Esco1(0.02), Mboat7(0.01), Pla2g15(0.01), Ykt6(-0.01), Lpcat3(-0.03), Nat6(-0.06), Lclat1(-0.09), Naa40(-0.1), Nat10(-0.18), Naa50(-0.22), Nat8f2(-0.25), Nat9(-0.28), Naa10(-0.44), Acnat2(-0.46), Nat8f5(-0.49), Acnat1(-0.5), Lipt1(-0.5), Ciita(-0.55),
protein-cysteine S-acyltransferase activity	0.109601	0.205424	0.0354453	0.153683	26	0.410458	0.474201	0.0461251	0.0541493	0.323432	Mboat1(0.56), Nat14(0.33), Nat8f1(0.31), Lpgat1(0.28), Porcn(0.18), Mboat2(0.17), Hhat(0.05), Nat8(0.04), Esco1(0.02), Mboat7(0.01), Pla2g15(0.01), Ykt6(-0.01), Lpcat3(-0.03), Nat6(-0.06), Lclat1(-0.09), Naa40(-0.1), Nat10(-0.18), Naa50(-0.22), Nat8f2(-0.25), Nat9(-0.28), Naa10(-0.44), Acnat2(-0.46), Nat8f5(-0.49), Acnat1(-0.5), Lipt1(-0.5), Ciita(-0.55),
dihydrolipoamide S-acyltransferase activity	0.109601	0.205424	0.0354453	0.153683	26	0.410458	0.474201	0.0461251	0.0541493	0.323432	Mboat1(0.56), Nat14(0.33), Nat8f1(0.31), Lpgat1(0.28), Porcn(0.18), Mboat2(0.17), Hhat(0.05), Nat8(0.04), Esco1(0.02), Mboat7(0.01), Pla2g15(0.01), Ykt6(-0.01), Lpcat3(-0.03), Nat6(-0.06), Lclat1(-0.09), Naa40(-0.1), Nat10(-0.18), Naa50(-0.22), Nat8f2(-0.25), Nat9(-0.28), Naa10(-0.44), Acnat2(-0.46), Nat8f5(-0.49), Acnat1(-0.5), Lipt1(-0.5), Ciita(-0.55),
glucosaminyl-phosphotidylinositol O-acyltransferase activity	0.109601	0.205424	0.0354453	0.153683	26	0.410458	0.474201	0.0461251	0.0541493	0.323432	Mboat1(0.56), Nat14(0.33), Nat8f1(0.31), Lpgat1(0.28), Porcn(0.18), Mboat2(0.17), Hhat(0.05), Nat8(0.04), Esco1(0.02), Mboat7(0.01), Pla2g15(0.01), Ykt6(-0.01), Lpcat3(-0.03), Nat6(-0.06), Lclat1(-0.09), Naa40(-0.1), Nat10(-0.18), Naa50(-0.22), Nat8f2(-0.25), Nat9(-0.28), Naa10(-0.44), Acnat2(-0.46), Nat8f5(-0.49), Acnat1(-0.5), Lipt1(-0.5), Ciita(-0.55),
ergosterol O-acyltransferase activity	0.109601	0.205424	0.0354453	0.153683	26	0.410458	0.474201	0.0461251	0.0541493	0.323432	Mboat1(0.56), Nat14(0.33), Nat8f1(0.31), Lpgat1(0.28), Porcn(0.18), Mboat2(0.17), Hhat(0.05), Nat8(0.04), Esco1(0.02), Mboat7(0.01), Pla2g15(0.01), Ykt6(-0.01), Lpcat3(-0.03), Nat6(-0.06), Lclat1(-0.09), Naa40(-0.1), Nat10(-0.18), Naa50(-0.22), Nat8f2(-0.25), Nat9(-0.28), Naa10(-0.44), Acnat2(-0.46), Nat8f5(-0.49), Acnat1(-0.5), Lipt1(-0.5), Ciita(-0.55),
lanosterol O-acyltransferase activity	0.109601	0.205424	0.0354453	0.153683	26	0.410458	0.474201	0.0461251	0.0541493	0.323432	Mboat1(0.56), Nat14(0.33), Nat8f1(0.31), Lpgat1(0.28), Porcn(0.18), Mboat2(0.17), Hhat(0.05), Nat8(0.04), Esco1(0.02), Mboat7(0.01), Pla2g15(0.01), Ykt6(-0.01), Lpcat3(-0.03), Nat6(-0.06), Lclat1(-0.09), Naa40(-0.1), Nat10(-0.18), Naa50(-0.22), Nat8f2(-0.25), Nat9(-0.28), Naa10(-0.44), Acnat2(-0.46), Nat8f5(-0.49), Acnat1(-0.5), Lipt1(-0.5), Ciita(-0.55),
naphthyl-2-oxomethyl-succinyl-CoA succinyl transferase activity	0.109601	0.205424	0.0354453	0.153683	26	0.410458	0.474201	0.0461251	0.0541493	0.323432	Mboat1(0.56), Nat14(0.33), Nat8f1(0.31), Lpgat1(0.28), Porcn(0.18), Mboat2(0.17), Hhat(0.05), Nat8(0.04), Esco1(0.02), Mboat7(0.01), Pla2g15(0.01), Ykt6(-0.01), Lpcat3(-0.03), Nat6(-0.06), Lclat1(-0.09), Naa40(-0.1), Nat10(-0.18), Naa50(-0.22), Nat8f2(-0.25), Nat9(-0.28), Naa10(-0.44), Acnat2(-0.46), Nat8f5(-0.49), Acnat1(-0.5), Lipt1(-0.5), Ciita(-0.55),
2,4,4-trimethyl-3-oxopentanoyl-CoA 2-C-propanoyl transferase activity	0.109601	0.205424	0.0354453	0.153683	26	0.410458	0.474201	0.0461251	0.0541493	0.323432	Mboat1(0.56), Nat14(0.33), Nat8f1(0.31), Lpgat1(0.28), Porcn(0.18), Mboat2(0.17), Hhat(0.05), Nat8(0.04), Esco1(0.02), Mboat7(0.01), Pla2g15(0.01), Ykt6(-0.01), Lpcat3(-0.03), Nat6(-0.06), Lclat1(-0.09), Naa40(-0.1), Nat10(-0.18), Naa50(-0.22), Nat8f2(-0.25), Nat9(-0.28), Naa10(-0.44), Acnat2(-0.46), Nat8f5(-0.49), Acnat1(-0.5), Lipt1(-0.5), Ciita(-0.55),
2-methylhexanoyl-CoA C-acetyltransferase activity	0.109601	0.205424	0.0354453	0.153683	26	0.410458	0.474201	0.0461251	0.0541493	0.323432	Mboat1(0.56), Nat14(0.33), Nat8f1(0.31), Lpgat1(0.28), Porcn(0.18), Mboat2(0.17), Hhat(0.05), Nat8(0.04), Esco1(0.02), Mboat7(0.01), Pla2g15(0.01), Ykt6(-0.01), Lpcat3(-0.03), Nat6(-0.06), Lclat1(-0.09), Naa40(-0.1), Nat10(-0.18), Naa50(-0.22), Nat8f2(-0.25), Nat9(-0.28), Naa10(-0.44), Acnat2(-0.46), Nat8f5(-0.49), Acnat1(-0.5), Lipt1(-0.5), Ciita(-0.55),
butyryl-CoA 2-C-propionyltransferase activity	0.109601	0.205424	0.0354453	0.153683	26	0.410458	0.474201	0.0461251	0.0541493	0.323432	Mboat1(0.56), Nat14(0.33), Nat8f1(0.31), Lpgat1(0.28), Porcn(0.18), Mboat2(0.17), Hhat(0.05), Nat8(0.04), Esco1(0.02), Mboat7(0.01), Pla2g15(0.01), Ykt6(-0.01), Lpcat3(-0.03), Nat6(-0.06), Lclat1(-0.09), Naa40(-0.1), Nat10(-0.18), Naa50(-0.22), Nat8f2(-0.25), Nat9(-0.28), Naa10(-0.44), Acnat2(-0.46), Nat8f5(-0.49), Acnat1(-0.5), Lipt1(-0.5), Ciita(-0.55),
2,6-dimethyl-5-methylene-3-oxo-heptanoyl-CoA C-acetyltransferase activity	0.109601	0.205424	0.0354453	0.153683	26	0.410458	0.474201	0.0461251	0.0541493	0.323432	Mboat1(0.56), Nat14(0.33), Nat8f1(0.31), Lpgat1(0.28), Porcn(0.18), Mboat2(0.17), Hhat(0.05), Nat8(0.04), Esco1(0.02), Mboat7(0.01), Pla2g15(0.01), Ykt6(-0.01), Lpcat3(-0.03), Nat6(-0.06), Lclat1(-0.09), Naa40(-0.1), Nat10(-0.18), Naa50(-0.22), Nat8f2(-0.25), Nat9(-0.28), Naa10(-0.44), Acnat2(-0.46), Nat8f5(-0.49), Acnat1(-0.5), Lipt1(-0.5), Ciita(-0.55),
L-2-aminoadipate N-acetyltransferase activity	0.109601	0.205424	0.0354453	0.153683	26	0.410458	0.474201	0.0461251	0.0541493	0.323432	Mboat1(0.56), Nat14(0.33), Nat8f1(0.31), Lpgat1(0.28), Porcn(0.18), Mboat2(0.17), Hhat(0.05), Nat8(0.04), Esco1(0.02), Mboat7(0.01), Pla2g15(0.01), Ykt6(-0.01), Lpcat3(-0.03), Nat6(-0.06), Lclat1(-0.09), Naa40(-0.1), Nat10(-0.18), Naa50(-0.22), Nat8f2(-0.25), Nat9(-0.28), Naa10(-0.44), Acnat2(-0.46), Nat8f5(-0.49), Acnat1(-0.5), Lipt1(-0.5), Ciita(-0.55),
keto acid formate lyase activity	0.109601	0.205424	0.0354453	0.153683	26	0.410458	0.474201	0.0461251	0.0541493	0.323432	Mboat1(0.56), Nat14(0.33), Nat8f1(0.31), Lpgat1(0.28), Porcn(0.18), Mboat2(0.17), Hhat(0.05), Nat8(0.04), Esco1(0.02), Mboat7(0.01), Pla2g15(0.01), Ykt6(-0.01), Lpcat3(-0.03), Nat6(-0.06), Lclat1(-0.09), Naa40(-0.1), Nat10(-0.18), Naa50(-0.22), Nat8f2(-0.25), Nat9(-0.28), Naa10(-0.44), Acnat2(-0.46), Nat8f5(-0.49), Acnat1(-0.5), Lipt1(-0.5), Ciita(-0.55),
azetidine-2-carboxylic acid acetyltransferase activity	0.109601	0.205424	0.0354453	0.153683	26	0.410458	0.474201	0.0461251	0.0541493	0.323432	Mboat1(0.56), Nat14(0.33), Nat8f1(0.31), Lpgat1(0.28), Porcn(0.18), Mboat2(0.17), Hhat(0.05), Nat8(0.04), Esco1(0.02), Mboat7(0.01), Pla2g15(0.01), Ykt6(-0.01), Lpcat3(-0.03), Nat6(-0.06), Lclat1(-0.09), Naa40(-0.1), Nat10(-0.18), Naa50(-0.22), Nat8f2(-0.25), Nat9(-0.28), Naa10(-0.44), Acnat2(-0.46), Nat8f5(-0.49), Acnat1(-0.5), Lipt1(-0.5), Ciita(-0.55),
peptidyl-lysine acetyltransferase activity	0.109601	0.205424	0.0354453	0.153683	26	0.410458	0.474201	0.0461251	0.0541493	0.323432	Mboat1(0.56), Nat14(0.33), Nat8f1(0.31), Lpgat1(0.28), Porcn(0.18), Mboat2(0.17), Hhat(0.05), Nat8(0.04), Esco1(0.02), Mboat7(0.01), Pla2g15(0.01), Ykt6(-0.01), Lpcat3(-0.03), Nat6(-0.06), Lclat1(-0.09), Naa40(-0.1), Nat10(-0.18), Naa50(-0.22), Nat8f2(-0.25), Nat9(-0.28), Naa10(-0.44), Acnat2(-0.46), Nat8f5(-0.49), Acnat1(-0.5), Lipt1(-0.5), Ciita(-0.55),
acetyl-CoA:L-lysine N6-acetyltransferase	0.109601	0.205424	0.0354453	0.153683	26	0.410458	0.474201	0.0461251	0.0541493	0.323432	Mboat1(0.56), Nat14(0.33), Nat8f1(0.31), Lpgat1(0.28), Porcn(0.18), Mboat2(0.17), Hhat(0.05), Nat8(0.04), Esco1(0.02), Mboat7(0.01), Pla2g15(0.01), Ykt6(-0.01), Lpcat3(-0.03), Nat6(-0.06), Lclat1(-0.09), Naa40(-0.1), Nat10(-0.18), Naa50(-0.22), Nat8f2(-0.25), Nat9(-0.28), Naa10(-0.44), Acnat2(-0.46), Nat8f5(-0.49), Acnat1(-0.5), Lipt1(-0.5), Ciita(-0.55),
respiratory electron transport chain	0.148265	0.269216	0.0356229	0.154225	15	0.465842	0.210002	0.46815	0.0572797	0.0689614	Polg2(0.26), Ppargc1a(0.09), Sdha(0.09), CYTB(0.08), Pink1(0.06), Sod2(0.02), Ndufa5(-0.03), Coq7(-0.05), Aldh5a1(-0.07), Ndufs6(-0.09), Sdhb(-0.14), Sdhb(-0.14), Immp2l(-0.21), Ndufaf2(-0.24), Mybbp1a(-0.54),
antioxidant activity	0.0864174	0.227868	0.0356575	0.154225	25	0.884235	0.446434	0.0513401	0.0139752	0.103035	S100a9(0.76), S100a8(0.74), Trp53inp1(0.35), Hp(0.26), Kdm3b(0.18), Apoe(0.11), Vimp(0.04), Sepw1(-0.06), Apom(-0.07), Apom(-0.07), Fam213a(-0.07), Fam213a(-0.07), Prdx4(-0.09), Srxn1(-0.09), Sod1(-0.1), Aaed1(-0.13), Cat(-0.18), Sod3(-0.18), Prdx5(-0.18), Ubiad1(-0.19), Prdx2(-0.2), Apoa4(-0.26), Prdx3(-0.3), Prdx6(-0.3), Prdx1(-0.35),
sodium ion transmembrane transport	0.0889618	0.243257	0.036053	0.155555	25	0.111516	0.587124	0.281154	0.0981684	0.124737	Slc17a4(0.62), Pkd2(0.3), Scnn1a(0.27), Slc12a3(0.24), Ano6(0.22), Scnn1b(0.16), Slc8b1(0.04), Slc8b1(0.04), Scn1b(0.03), Scn1b(0.03), Scn2b(0.02), Slc8a1(0.01), Asic1(-0.02), Scn5a(-0.05), Kcnk1(-0.12), Slc17a1(-0.16), Slc4a11(-0.17), Hcn3(-0.22), Slc17a3(-0.25), Scn4b(-0.25), Scn4b(-0.25), Scn4b(-0.25), Scnn1g(-0.37), Hcn2(-0.54), Slc13a1(-0.58),
histone deubiquitination	0.160351	0.238275	0.0362469	0.156202	16	0.307149	0.244853	0.0977489	0.246066	0.200495	Usp27x(0.38), Atxn7(0.25), Trrap(0.21), Usp34(0.18), Atxn7l3(0.01), Usp3(0.01), Usp3(0.01), Usp16(-0.01), Usp22(-0.03), Usp22(-0.03), Usp21(-0.16), Eny2(-0.19), Eny2(-0.19), Taf10(-0.27), Supt3(-0.42), Kat2a(-0.48),
positive regulation of organ growth	0.133734	0.298956	0.0363167	0.156312	11	0.168277	0.204952	0.178044	0.317647	0.202752	Cacna2d2(0.66), Hlx(0.44), Yap1(0.12), Sash3(0.1), Il7(-0.07), Il7(-0.07), Serp1(-0.16), Smo(-0.26), Ybx3(-0.36), Agt(-0.75), Agt(-0.75),
O-acyltransferase activity	0.10229	0.181879	0.0365233	0.156853	36	0.315359	0.426663	0.0669987	0.0414898	0.456018	Mboat1(0.56), Lcat(0.51), Soat2(0.39), Nat14(0.33), Nat8f1(0.31), Lpgat1(0.28), Dgat1(0.2), Porcn(0.18), Mboat2(0.17), Hhat(0.05), Nat8(0.04), Esco1(0.02), Mboat7(0.01), Pla2g15(0.01), Pla2g15(0.01), Soat1(0), Ykt6(-0.01), Lpcat3(-0.03), Nat6(-0.06), Lclat1(-0.09), Naa40(-0.1), Taz(-0.13), Gpam(-0.16), Nat10(-0.18), Gnpat(-0.21), Naa50(-0.22), Nat8f2(-0.25), Nat9(-0.28), Naa10(-0.44), Acnat2(-0.4…
midbody	0.140568	0.11522	0.0365311	0.156853	103	0.249069	0.494337	0.0723079	0.128569	0.234409	Kif23(0.66), Gem(0.37), Birc5(0.33), Syne1(0.32), Ptpn13(0.31), Chmp4c(0.3), Mtcl1(0.27), Slc2a1(0.26), Clic4(0.25), Ttc28(0.24), Aspm(0.23), Birc6(0.22), Iqgap1(0.22), Flcn(0.22), Myh10(0.21), Ctdp1(0.2), Kif13a(0.18), Stx2(0.17), Gdi1(0.17), Hspa5(0.17), Ctnnd1(0.16), Zfyve26(0.16), Pkp4(0.16), Ptch1(0.15), Cyld(0.15), Gnai3(0.11), Kif3b(0.11), Zfp330(0.11), Rab11fip3(0.11), Anxa11(0.1), Mitd1(…
apoptotic signaling pathway	0.152899	0.138737	0.0366255	0.157068	47	0.0450017	0.231865	0.12486	0.360332	0.472619	Cd24a(0.34), Apaf1(0.32), Uaca(0.31), Hip1(0.31), Tnfrsf11b(0.28), Cd40(0.26), Tnfrsf11a(0.23), Fas(0.19), Fas(0.19), Tnfrsf14(0.18), Anxa6(0.16), Cav1(0.16), Ppard(0.16), Casp2(0.13), Senp1(0.1), Dido1(0.09), Sgpl1(0.08), Relt(0.08), Dapk1(0.05), Tnfrsf25(0.05), Tnfrsf21(0.01), Spn(-0.03), Pawr(-0.04), Ticam1(-0.05), Ptgis(-0.07), Tm2d1(-0.08), Daxx(-0.1), Casp8(-0.13), Casp8(-0.13), Dapk3(-0.13…
fatty acid ligase activity	0.0937026	0.329417	0.0372897	0.159723	11	0.710938	0.644298	0.127079	0.0198883	0.0430139	Slc27a2(0.06), Acsm3(0.05), Slc27a4(-0.02), Sucla2(-0.03), Acsm1(-0.07), Slc27a3(-0.08), Suclg2(-0.13), Slc27a1(-0.15), Acsf2(-0.2), Acsf3(-0.21), Aasdh(-0.22),
transcription factor TFTC complex	0.177663	0.241139	0.038861	0.166066	14	0.296394	0.119684	0.104559	0.342238	0.284056	Trrap(0.21), Taf7(0.15), Taf5(0.14), Taf9b(0.11), Taf4(0.09), Taf5l(0.03), Taf2(-0.02), Tada3(-0.03), Taf6(-0.16), Taf12(-0.22), Taf10(-0.27), Taf9(-0.34), Supt3(-0.42), Kat2a(-0.48),
3,4-dihydrocoumarin hydrolase activity	0.145162	0.217267	0.0388646	0.166066	20	0.29769	0.612282	0.148761	0.0935846	0.0904628	Liph(0.71), Pla1a(0.2), Dagla(0.19), Pon3(0.17), Ces2g(0.02), Ddhd1(0.02), Pnpla7(-0.01), Ces1e(-0.04), Plbd1(-0.09), Plbd2(-0.1), Ache(-0.13), Ddhd2(-0.13), Ces1f(-0.15), Ldah(-0.18), Ces2b(-0.19), Nceh1(-0.21), Prdx6(-0.3), Daglb(-0.31), Abhd15(-0.39), Ces1g(-0.67),
peroxidase activity	0.108237	0.223824	0.0395069	0.168607	24	0.303969	0.252351	0.238615	0.35049	0.0492038	Gpx6(1.66), Ptgs2(1.16), Ptgs1(0.31), Hba-a2(0.24), Gpx7(0.21), Gpx8(0.17), Hba-a1(0.11), Pxdn(0.07), Pxdn(0.07), Gpx3(-0.09), Prdx4(-0.09), Lpo(-0.11), Txndc17(-0.12), Cygb(-0.17), Cygb(-0.17), Cat(-0.18), Prdx5(-0.18), Upk3bl(-0.19), Prdx2(-0.2), Gpx1(-0.21), Prdx3(-0.3), Prdx6(-0.3), Gpx4(-0.3), Prdx1(-0.35),
glycerol-3-phosphate O-acyltransferase activity	0.119706	0.379042	0.0397748	0.169534	10	0.090287	0.274912	0.153818	0.0248015	0.841362	Agpat9(0.16), Agpat9(0.16), Gpat4(-0.03), Gpat4(-0.03), Gpat4(-0.03), Gpam(-0.16), Gpam(-0.16), Gpam(-0.16), Gpat2(-0.49), Gpat2(-0.49),
positive regulation of DNA repair	0.187806	0.163193	0.0398199	0.169534	31	0.182868	0.268806	0.0966236	0.386735	0.209101	Eya4(0.69), Sirt1(0.4), Egfr(0.25), Cbx8(0.23), Pnp(0.15), Cebpg(0.14), Rnf8(0.13), Npas2(0.09), Eya3(0.07), Eya3(0.07), Uimc1(0.07), Uimc1(0.07), Parg(0.03), Rnf168(0.02), Ube2v2(0.02), Eya2(-0.04), Ube2n(-0.07), Brcc3(-0.08), Apbb1(-0.11), Apbb1(-0.11), Pcna(-0.11), Tmem161a(-0.11), Trim28(-0.13), Bre(-0.19), Babam1(-0.21), Tigar(-0.22), Fam175a(-0.28), Rps3(-0.32), Mgmt(-0.46), Apex1(-0.61), B…
vacuolar proton-transporting V-type ATPase complex	0.176977	0.259183	0.0405251	0.172122	18	0.418763	0.248684	0.248896	0.105641	0.137991	Atp6v1g3(0.32), Atp6v0d2(0.14), Atp6v0d2(0.14), Atp6v0a1(0.09), Atp6v1g2(0.07), Tcirg1(0.06), Atp6v0c(0.02), Atp6v0a2(-0.01), Atp6v1b1(-0.04), Atp6v1b1(-0.04), Atp6v0a4(-0.04), Atp6v0a4(-0.04), Atp6v0a4(-0.04), Atp6v0d1(-0.11), Atp6v0d1(-0.11), Atp6v1g1(-0.11), Atp6v0b(-0.17), Atp6v1f(-0.24),
melanosome	0.14705	0.19434	0.0408373	0.17324	27	0.131601	0.434708	0.0455906	0.261812	0.388633	Itgb3(0.67), Rab27b(0.51), Rab27b(0.51), Myrip(0.5), Sytl2(0.34), Mreg(0.14), Myo5a(0.09), Sytl1(0.07), Rab27a(0.06), Rab27a(0.06), Rab1a(0.06), Myo7a(0.01), Stx3(0), Hps4(-0.05), Hps4(-0.05), Gchfr(-0.12), Lamp1(-0.15), Rab29(-0.16), Tmem33(-0.18), Rab32(-0.24), Rab32(-0.24), Mlph(-0.25), Mlph(-0.25), Ankrd27(-0.27), Rab17(-0.48), Rab38(-0.52), Rab38(-0.52),
phosphotransferase activity, alcohol group as acceptor	0.132524	0.217	0.0411844	0.174504	20	0.659628	0.42512	0.225512	0.00853046	0.166568	Hk2(0.79), G6pc(0.58), Hk3(0.53), Hkdc1(0.4), Hk1(0.29), Xylb(0.04), Fam20b(0.03), Fuk(0.01), Gk(-0.02), Fggy(-0.08), Gk5(-0.1), Galk2(-0.13), Mvk(-0.14), Adk(-0.21), Galk1(-0.31), Rbks(-0.32), Shpk(-0.32), Adpgk(-0.35), Pomk(-0.48), Pomk(-0.48),
necroptotic process	0.18541	0.233738	0.0413704	0.175082	18	0.236999	0.177519	0.0836179	0.369707	0.299806	Birc3(0.35), Pygl(0.35), Ripk3(0.28), Ripk3(0.28), Ripk3(0.28), Cyld(0.15), Ripk1(0.08), Ripk1(0.08), Trpm7(0.08), Birc2(0.05), Dnm1l(0.01), Dnm1l(0.01), Pgam5(-0.37), Pgam5(-0.37), Mlkl(-0.45), Mlkl(-0.45), Trp53(-0.49), Ppif(-0.52),
copper ion binding	0.134553	0.148494	0.0418155	0.176754	46	0.436717	0.804003	0.156082	0.019062	0.0693182	Ang(0.64), Moxd1(0.64), F5(0.49), Lox(0.44), Mt1(0.42), Heph(0.38), Aoc3(0.3), Cox17(0.25), Loxl2(0.24), Atp7a(0.17), Loxl1(0.17), Pam(0.12), S100a13(0.12), Cp(0.04), Cp(0.04), Slc11a2(0.03), Gpc1(0.02), F8(0.01), Ccs(0), Ccs(0), Snca(-0.02), Aoc2(-0.03), Loxl3(-0.09), Prnp(-0.1), Prnp(-0.1), Sod1(-0.1), Sod1(-0.1), Rnpep(-0.1), Cutc(-0.11), Cutal(-0.15), Mettl17(-0.16), Sod3(-0.18), Cox11(-0.18)…
pyridoxal phosphate binding	0.0322425	0.200237	0.0419457	0.177093	50	0.845494	0.546274	0.573219	6.75364e-05	0.0859322	Hdc(0.84), Sptlc3(0.54), Aadat(0.45), Etnppl(0.45), Pygl(0.35), Accs(0.29), Cbs(0.27), Cbs(0.27), Alas2(0.25), Pygm(0.21), Pygm(0.21), Abat(0.17), Abat(0.17), Thnsl2(0.11), Pygb(0.1), Sgpl1(0.08), Pdxdc1(0.04), Bcat2(0.01), Kyat3(0.01), Csad(0), Got1(-0.02), Agxt2(-0.02), Kynu(-0.03), Ddc(-0.05), Sdsl(-0.05), Oat(-0.06), Gpt(-0.08), Sptlc2(-0.09), Got2(-0.11), Got2(-0.11), Phykpl(-0.11), Prosc(-0…
snRNA binding	0.175003	0.269358	0.0429537	0.181133	11	0.445436	0.11469	0.143652	0.232932	0.239545	Ccnt1(0.24), Hexim1(0.09), Cdk9(0.04), Snrpb2(-0.04), Ncbp2(-0.05), Hexim2(-0.09), Rbpms(-0.19), Snrnp35(-0.22), Snrpa(-0.29), Lsm10(-0.31), Gemin5(-0.34),
cellular response to nitrogen starvation	0.186027	0.308118	0.0439685	0.184971	10	0.587817	0.211561	0.183256	0.15537	0.0934502	Rb1cc1(0.2), Map1lc3b(0.08), Gabarapl1(0.03), Becn1(-0.02), Gabarap(-0.07), Map1lc3a(-0.07), Gabarapl2(-0.13), Atg7(-0.18), Nprl2(-0.22), Atg5(-0.3),
protein maturation	0.147894	0.224113	0.0447246	0.187928	20	0.327365	0.221653	0.45694	0.100119	0.116103	Ambp(0.37), Sorl1(0.36), Tspan14(0.15), Tspan14(0.15), Tspan15(0.04), Tspan15(0.04), Serpinh1(0.02), Psen1(-0.02), Tspan17(-0.05), Tesc(-0.07), Tspan5(-0.09), Tspan5(-0.09), Stub1(-0.12), Lmf1(-0.12), Lmf2(-0.14), Psen2(-0.15), Tspan33(-0.15), Tspan33(-0.15), Snapin(-0.17), Aga(-0.18),
peptide catabolic process	0.0777588	0.270962	0.0449354	0.18859	22	0.709073	0.733709	0.0308316	0.00963937	0.224079	Cndp1(0.48), Lnpep(0.33), Enpep(0.14), Pm20d1(0.14), 2010111I01Rik(0.13), Acy1(0.01), Rnpepl1(-0.01), Npepps(-0.04), Rnpep(-0.1), Cndp2(-0.11), Cpq(-0.12), Cpq(-0.12), Tpp1(-0.14), Tpp1(-0.14), Lta4h(-0.16), Lta4h(-0.16), Anpep(-0.17), Mmp13(-0.18), Ace(-0.21), Ide(-0.23), Erap1(-0.23), Cpe(-0.56),
tetrahydrobiopterin biosynthetic process	0.126507	0.381228	0.0460786	0.192724	10	0.677316	0.135739	0.141567	0.0595422	0.310501	Gch1(0.13), Gch1(0.13), Gch1(0.13), Dhfr(0.07), Dhfr(0.07), Qdpr(-0.04), Pcbd2(-0.12), Pcbd1(-0.16), Pts(-0.22), Spr(-0.24),
complement activation, classical pathway	0.122674	0.253188	0.0460838	0.192724	16	0.723768	0.388752	0.186677	0.197608	0.00972496	C1s1(0.19), Cd55(0.17), C8a(0.15), C1ra(0.05), Serping1(0.01), C8g(-0.02), Cr1l(-0.03), C1rl(-0.05), C1qb(-0.09), Mbl1(-0.14), C1qa(-0.2), C1qc(-0.25), Cfi(-0.26), C2(-0.29), C3(-0.34), C1qbp(-0.61),
protein metabolic process	0.188198	0.289413	0.0465069	0.194264	10	0.37026	0.38139	0.112787	0.0927836	0.278499	Cdh1(0.38), Numbl(0.26), Pam(0.12), Park2(-0.02), Senp3(-0.1), Lap3(-0.15), Prep(-0.25), Bag2(-0.31), Npepl1(-0.32), Tgm1(-0.48),
NAD+ ADP-ribosyltransferase activity	0.146681	0.206955	0.0466094	0.194462	22	0.18395	0.0791187	0.505886	0.196421	0.273442	Parp4(0.43), Tiparp(0.39), Tiparp(0.39), Tnks(0.23), Parp16(0.17), Parp8(0.16), Zc3hav1(0.13), Parp6(0.11), Tnks2(0.05), Parp14(0.03), Parp12(-0.06), Parp2(-0.09), Parp10(-0.1), Parp11(-0.12), Parp9(-0.13), Parp3(-0.23), Parp1(-0.34), Parp1(-0.34), Parp1(-0.34), Sirt4(-0.34), Sirt4(-0.34), Sirt4(-0.34),
alpha-(1->6)-fucosyltransferase activity	0.161158	0.136502	0.0468972	0.195433	48	0.0305393	0.10844	0.239922	0.687174	0.337054	B3galt1(0.56), Galnt15(0.51), Galnt16(0.48), Wbscr17(0.22), B4galt1(0.18), Galnt12(0.17), B4galt3(0.15), B3gnt3(0.13), Fut9(0.11), B4galt4(0.11), B3gnt7(0.11), B4galt2(0.07), Dpy19l4(0.07), B3galt2(0.06), B3gnt9(0.06), Dpy19l3(0.05), Pigv(0.04), Galnt10(0.02), B4galt5(0.01), Uggt1(0.01), Dpy19l1(0), B3glct(0), Fut4(-0.01), Pigm(-0.02), Galnt14(-0.04), Glt8d1(-0.04), B3gnt2(-0.05), Fut11(-0.06), A…
fucosyltransferase activity	0.146621	0.132365	0.0470205	0.195716	52	0.0183808	0.104389	0.321512	0.707661	0.31492	Sec1(0.63), B3galt1(0.56), Galnt15(0.51), Galnt16(0.48), Wbscr17(0.22), B4galt1(0.18), Galnt12(0.17), B4galt3(0.15), B3gnt3(0.13), Fut9(0.11), B4galt4(0.11), B3gnt7(0.11), Fut2(0.07), B4galt2(0.07), Dpy19l4(0.07), B3galt2(0.06), B3gnt9(0.06), Dpy19l3(0.05), Pigv(0.04), Galnt10(0.02), B4galt5(0.01), Uggt1(0.01), Dpy19l1(0), B3glct(0), Fut4(-0.01), Pigm(-0.02), Pofut2(-0.03), Galnt14(-0.04), Glt8d1…
tumor necrosis factor receptor binding	0.115279	0.207588	0.0477427	0.198255	29	0.0125766	0.342722	0.0810105	0.483736	0.638825	Tnfsf14(1.09), Tnfsf18(0.92), Tnfsf15(0.72), Traf1(0.35), Tnfsf9(0.22), Tnfsf13b(0.15), Nucb2(0.15), Traf6(0.11), Tnfsf13(0.09), Traf4(-0.03), Traf2(-0.06), Traf3(-0.08), Siva1(-0.08), Eda(-0.11), Tradd(-0.12), Casp8(-0.13), Ltb(-0.15), Tnf(-0.19), Tnf(-0.19), Tnf(-0.19), Tnf(-0.19), Bre(-0.19), Bre(-0.19), Tnfsf10(-0.22), Erap1(-0.23), Fadd(-0.25), Stat1(-0.26), Tnfsf12(-0.27), Trim37(-0.34),
eukaryotic initiation factor 4E binding	0.202371	0.274298	0.0481901	0.199879	10	0.26193	0.267907	0.188404	0.125115	0.334443	Hhex(0.31), Ddx3x(0.26), Eif4g1(0.03), Eif4ebp2(-0.04), Eif4ebp3(-0.06), Larp1(-0.1), Rbx1(-0.15), Angel1(-0.37), Eif4ebp1(-0.38), Eif4ebp1(-0.38),
beta-N-acetylhexosaminidase activity	0.155288	0.357738	0.0488741	0.202242	10	0.259821	0.487345	0.313209	0.190506	0.0480359	Chil3(0.59), Mgea5(0.41), Hexdc(0.13), Hexa(-0.14), Hexa(-0.14), Hexa(-0.14), Hexb(-0.14), Hexb(-0.14), Hexb(-0.14), Gm2a(-0.21),
SAGA complex	0.184569	0.261441	0.0491201	0.203022	13	0.142696	0.203713	0.164265	0.436807	0.253233	Usp27x(0.38), Usp34(0.18), Taf9b(0.11), Supt20(0.09), Atxn7l3(0.01), Tada3(-0.03), Usp22(-0.03), Usp22(-0.03), Eny2(-0.19), Eny2(-0.19), Wdr75(-0.23), Taf9(-0.34), Supt3(-0.42),
STAGA complex	0.195636	0.226155	0.0491954	0.203096	16	0.271304	0.248176	0.126467	0.202317	0.333663	Atxn7(0.25), Sap130(0.23), Sap130(0.23), Trrap(0.21), Taf5l(0.03), Tada1(0.02), Tada2b(-0.01), Supt7l(-0.03), Tada3(-0.03), Tada3(-0.03), Taf12(-0.22), Taf10(-0.27), Taf9(-0.34), Supt3(-0.42), Kat2a(-0.48), Kat2a(-0.48),
Golgi stack	0.191685	0.210617	0.0512022	0.21094	24	0.325047	0.260851	0.1291	0.165506	0.324519	Plk3(0.58), Rab27b(0.51), Lpcat2(0.18), Zfyve1(0.16), Gbf1(0.11), Cln3(0.07), Nsf(0.03), Nsf(0.03), Cog2(0.02), Ica1(0.01), Mbtps1(0.01), Bet1l(-0.01), Uso1(-0.01), Golga7(-0.01), Golga7(-0.01), March9(-0.02), Vrk1(-0.03), Rab14(-0.05), Mgat2(-0.09), Galnt2(-0.1), Lyz2(-0.11), Rab34(-0.16), Trappc4(-0.18), Tmbim4(-0.2),
alpha-(1->3)-fucosyltransferase activity	0.167009	0.135918	0.0520242	0.21094	48	0.0263671	0.132615	0.257244	0.63334	0.392638	B3galt1(0.56), Galnt15(0.51), Galnt16(0.48), Wbscr17(0.22), B4galt1(0.18), Galnt12(0.17), B4galt3(0.15), B3gnt3(0.13), Fut9(0.11), B4galt4(0.11), B3gnt7(0.11), B4galt2(0.07), Dpy19l4(0.07), B3galt2(0.06), B3gnt9(0.06), Dpy19l3(0.05), Pigv(0.04), Galnt10(0.02), B4galt5(0.01), Uggt1(0.01), Dpy19l1(0), B3glct(0), Fut4(-0.01), Fut4(-0.01), Pigm(-0.02), Galnt14(-0.04), Glt8d1(-0.04), B3gnt2(-0.05), Fu…
alpha-1,6-mannosyltransferase activity	0.160921	0.138965	0.0527052	0.21094	47	0.0261476	0.106961	0.273036	0.706189	0.353587	B3galt1(0.56), Galnt15(0.51), Galnt16(0.48), Wbscr17(0.22), B4galt1(0.18), Galnt12(0.17), B4galt3(0.15), B3gnt3(0.13), Fut9(0.11), B4galt4(0.11), B3gnt7(0.11), B4galt2(0.07), Dpy19l4(0.07), B3galt2(0.06), B3gnt9(0.06), Dpy19l3(0.05), Pigv(0.04), Galnt10(0.02), B4galt5(0.01), Uggt1(0.01), Dpy19l1(0), B3glct(0), Fut4(-0.01), Pigm(-0.02), Galnt14(-0.04), Glt8d1(-0.04), B3gnt2(-0.05), Fut11(-0.06), A…
alpha-1,2-mannosyltransferase activity	0.160921	0.138965	0.0527052	0.21094	47	0.0261476	0.106961	0.273036	0.706189	0.353587	B3galt1(0.56), Galnt15(0.51), Galnt16(0.48), Wbscr17(0.22), B4galt1(0.18), Galnt12(0.17), B4galt3(0.15), B3gnt3(0.13), Fut9(0.11), B4galt4(0.11), B3gnt7(0.11), B4galt2(0.07), Dpy19l4(0.07), B3galt2(0.06), B3gnt9(0.06), Dpy19l3(0.05), Pigv(0.04), Galnt10(0.02), B4galt5(0.01), Uggt1(0.01), Dpy19l1(0), B3glct(0), Fut4(-0.01), Pigm(-0.02), Galnt14(-0.04), Glt8d1(-0.04), B3gnt2(-0.05), Fut11(-0.06), A…
glycolipid mannosyltransferase activity	0.160921	0.138965	0.0527052	0.21094	47	0.0261476	0.106961	0.273036	0.706189	0.353587	B3galt1(0.56), Galnt15(0.51), Galnt16(0.48), Wbscr17(0.22), B4galt1(0.18), Galnt12(0.17), B4galt3(0.15), B3gnt3(0.13), Fut9(0.11), B4galt4(0.11), B3gnt7(0.11), B4galt2(0.07), Dpy19l4(0.07), B3galt2(0.06), B3gnt9(0.06), Dpy19l3(0.05), Pigv(0.04), Galnt10(0.02), B4galt5(0.01), Uggt1(0.01), Dpy19l1(0), B3glct(0), Fut4(-0.01), Pigm(-0.02), Galnt14(-0.04), Glt8d1(-0.04), B3gnt2(-0.05), Fut11(-0.06), A…
O antigen polymerase activity	0.160921	0.138965	0.0527052	0.21094	47	0.0261476	0.106961	0.273036	0.706189	0.353587	B3galt1(0.56), Galnt15(0.51), Galnt16(0.48), Wbscr17(0.22), B4galt1(0.18), Galnt12(0.17), B4galt3(0.15), B3gnt3(0.13), Fut9(0.11), B4galt4(0.11), B3gnt7(0.11), B4galt2(0.07), Dpy19l4(0.07), B3galt2(0.06), B3gnt9(0.06), Dpy19l3(0.05), Pigv(0.04), Galnt10(0.02), B4galt5(0.01), Uggt1(0.01), Dpy19l1(0), B3glct(0), Fut4(-0.01), Pigm(-0.02), Galnt14(-0.04), Glt8d1(-0.04), B3gnt2(-0.05), Fut11(-0.06), A…
lipopolysaccharide-1,6-galactosyltransferase activity	0.160921	0.138965	0.0527052	0.21094	47	0.0261476	0.106961	0.273036	0.706189	0.353587	B3galt1(0.56), Galnt15(0.51), Galnt16(0.48), Wbscr17(0.22), B4galt1(0.18), Galnt12(0.17), B4galt3(0.15), B3gnt3(0.13), Fut9(0.11), B4galt4(0.11), B3gnt7(0.11), B4galt2(0.07), Dpy19l4(0.07), B3galt2(0.06), B3gnt9(0.06), Dpy19l3(0.05), Pigv(0.04), Galnt10(0.02), B4galt5(0.01), Uggt1(0.01), Dpy19l1(0), B3glct(0), Fut4(-0.01), Pigm(-0.02), Galnt14(-0.04), Glt8d1(-0.04), B3gnt2(-0.05), Fut11(-0.06), A…
cellulose synthase activity	0.160921	0.138965	0.0527052	0.21094	47	0.0261476	0.106961	0.273036	0.706189	0.353587	B3galt1(0.56), Galnt15(0.51), Galnt16(0.48), Wbscr17(0.22), B4galt1(0.18), Galnt12(0.17), B4galt3(0.15), B3gnt3(0.13), Fut9(0.11), B4galt4(0.11), B3gnt7(0.11), B4galt2(0.07), Dpy19l4(0.07), B3galt2(0.06), B3gnt9(0.06), Dpy19l3(0.05), Pigv(0.04), Galnt10(0.02), B4galt5(0.01), Uggt1(0.01), Dpy19l1(0), B3glct(0), Fut4(-0.01), Pigm(-0.02), Galnt14(-0.04), Glt8d1(-0.04), B3gnt2(-0.05), Fut11(-0.06), A…
9-phenanthrol UDP-glucuronosyltransferase activity	0.160921	0.138965	0.0527052	0.21094	47	0.0261476	0.106961	0.273036	0.706189	0.353587	B3galt1(0.56), Galnt15(0.51), Galnt16(0.48), Wbscr17(0.22), B4galt1(0.18), Galnt12(0.17), B4galt3(0.15), B3gnt3(0.13), Fut9(0.11), B4galt4(0.11), B3gnt7(0.11), B4galt2(0.07), Dpy19l4(0.07), B3galt2(0.06), B3gnt9(0.06), Dpy19l3(0.05), Pigv(0.04), Galnt10(0.02), B4galt5(0.01), Uggt1(0.01), Dpy19l1(0), B3glct(0), Fut4(-0.01), Pigm(-0.02), Galnt14(-0.04), Glt8d1(-0.04), B3gnt2(-0.05), Fut11(-0.06), A…
1-phenanthrol glycosyltransferase activity	0.160921	0.138965	0.0527052	0.21094	47	0.0261476	0.106961	0.273036	0.706189	0.353587	B3galt1(0.56), Galnt15(0.51), Galnt16(0.48), Wbscr17(0.22), B4galt1(0.18), Galnt12(0.17), B4galt3(0.15), B3gnt3(0.13), Fut9(0.11), B4galt4(0.11), B3gnt7(0.11), B4galt2(0.07), Dpy19l4(0.07), B3galt2(0.06), B3gnt9(0.06), Dpy19l3(0.05), Pigv(0.04), Galnt10(0.02), B4galt5(0.01), Uggt1(0.01), Dpy19l1(0), B3glct(0), Fut4(-0.01), Pigm(-0.02), Galnt14(-0.04), Glt8d1(-0.04), B3gnt2(-0.05), Fut11(-0.06), A…
9-phenanthrol glycosyltransferase activity	0.160921	0.138965	0.0527052	0.21094	47	0.0261476	0.106961	0.273036	0.706189	0.353587	B3galt1(0.56), Galnt15(0.51), Galnt16(0.48), Wbscr17(0.22), B4galt1(0.18), Galnt12(0.17), B4galt3(0.15), B3gnt3(0.13), Fut9(0.11), B4galt4(0.11), B3gnt7(0.11), B4galt2(0.07), Dpy19l4(0.07), B3galt2(0.06), B3gnt9(0.06), Dpy19l3(0.05), Pigv(0.04), Galnt10(0.02), B4galt5(0.01), Uggt1(0.01), Dpy19l1(0), B3glct(0), Fut4(-0.01), Pigm(-0.02), Galnt14(-0.04), Glt8d1(-0.04), B3gnt2(-0.05), Fut11(-0.06), A…
1,2-dihydroxy-phenanthrene glycosyltransferase activity	0.160921	0.138965	0.0527052	0.21094	47	0.0261476	0.106961	0.273036	0.706189	0.353587	B3galt1(0.56), Galnt15(0.51), Galnt16(0.48), Wbscr17(0.22), B4galt1(0.18), Galnt12(0.17), B4galt3(0.15), B3gnt3(0.13), Fut9(0.11), B4galt4(0.11), B3gnt7(0.11), B4galt2(0.07), Dpy19l4(0.07), B3galt2(0.06), B3gnt9(0.06), Dpy19l3(0.05), Pigv(0.04), Galnt10(0.02), B4galt5(0.01), Uggt1(0.01), Dpy19l1(0), B3glct(0), Fut4(-0.01), Pigm(-0.02), Galnt14(-0.04), Glt8d1(-0.04), B3gnt2(-0.05), Fut11(-0.06), A…
phenanthrol glycosyltransferase activity	0.160921	0.138965	0.0527052	0.21094	47	0.0261476	0.106961	0.273036	0.706189	0.353587	B3galt1(0.56), Galnt15(0.51), Galnt16(0.48), Wbscr17(0.22), B4galt1(0.18), Galnt12(0.17), B4galt3(0.15), B3gnt3(0.13), Fut9(0.11), B4galt4(0.11), B3gnt7(0.11), B4galt2(0.07), Dpy19l4(0.07), B3galt2(0.06), B3gnt9(0.06), Dpy19l3(0.05), Pigv(0.04), Galnt10(0.02), B4galt5(0.01), Uggt1(0.01), Dpy19l1(0), B3glct(0), Fut4(-0.01), Pigm(-0.02), Galnt14(-0.04), Glt8d1(-0.04), B3gnt2(-0.05), Fut11(-0.06), A…
beta-1,4-mannosyltransferase activity	0.160921	0.138965	0.0527052	0.21094	47	0.0261476	0.106961	0.273036	0.706189	0.353587	B3galt1(0.56), Galnt15(0.51), Galnt16(0.48), Wbscr17(0.22), B4galt1(0.18), Galnt12(0.17), B4galt3(0.15), B3gnt3(0.13), Fut9(0.11), B4galt4(0.11), B3gnt7(0.11), B4galt2(0.07), Dpy19l4(0.07), B3galt2(0.06), B3gnt9(0.06), Dpy19l3(0.05), Pigv(0.04), Galnt10(0.02), B4galt5(0.01), Uggt1(0.01), Dpy19l1(0), B3glct(0), Fut4(-0.01), Pigm(-0.02), Galnt14(-0.04), Glt8d1(-0.04), B3gnt2(-0.05), Fut11(-0.06), A…
alpha-1,2-galactosyltransferase activity	0.160921	0.138965	0.0527052	0.21094	47	0.0261476	0.106961	0.273036	0.706189	0.353587	B3galt1(0.56), Galnt15(0.51), Galnt16(0.48), Wbscr17(0.22), B4galt1(0.18), Galnt12(0.17), B4galt3(0.15), B3gnt3(0.13), Fut9(0.11), B4galt4(0.11), B3gnt7(0.11), B4galt2(0.07), Dpy19l4(0.07), B3galt2(0.06), B3gnt9(0.06), Dpy19l3(0.05), Pigv(0.04), Galnt10(0.02), B4galt5(0.01), Uggt1(0.01), Dpy19l1(0), B3glct(0), Fut4(-0.01), Pigm(-0.02), Galnt14(-0.04), Glt8d1(-0.04), B3gnt2(-0.05), Fut11(-0.06), A…
dolichyl pyrophosphate Man7GlcNAc2 alpha-1,3-glucosyltransferase activity	0.160921	0.138965	0.0527052	0.21094	47	0.0261476	0.106961	0.273036	0.706189	0.353587	B3galt1(0.56), Galnt15(0.51), Galnt16(0.48), Wbscr17(0.22), B4galt1(0.18), Galnt12(0.17), B4galt3(0.15), B3gnt3(0.13), Fut9(0.11), B4galt4(0.11), B3gnt7(0.11), B4galt2(0.07), Dpy19l4(0.07), B3galt2(0.06), B3gnt9(0.06), Dpy19l3(0.05), Pigv(0.04), Galnt10(0.02), B4galt5(0.01), Uggt1(0.01), Dpy19l1(0), B3glct(0), Fut4(-0.01), Pigm(-0.02), Galnt14(-0.04), Glt8d1(-0.04), B3gnt2(-0.05), Fut11(-0.06), A…
lipopolysaccharide-1,5-galactosyltransferase activity	0.160921	0.138965	0.0527052	0.21094	47	0.0261476	0.106961	0.273036	0.706189	0.353587	B3galt1(0.56), Galnt15(0.51), Galnt16(0.48), Wbscr17(0.22), B4galt1(0.18), Galnt12(0.17), B4galt3(0.15), B3gnt3(0.13), Fut9(0.11), B4galt4(0.11), B3gnt7(0.11), B4galt2(0.07), Dpy19l4(0.07), B3galt2(0.06), B3gnt9(0.06), Dpy19l3(0.05), Pigv(0.04), Galnt10(0.02), B4galt5(0.01), Uggt1(0.01), Dpy19l1(0), B3glct(0), Fut4(-0.01), Pigm(-0.02), Galnt14(-0.04), Glt8d1(-0.04), B3gnt2(-0.05), Fut11(-0.06), A…
dolichyl pyrophosphate Glc1Man9GlcNAc2 alpha-1,3-glucosyltransferase activity	0.160921	0.138965	0.0527052	0.21094	47	0.0261476	0.106961	0.273036	0.706189	0.353587	B3galt1(0.56), Galnt15(0.51), Galnt16(0.48), Wbscr17(0.22), B4galt1(0.18), Galnt12(0.17), B4galt3(0.15), B3gnt3(0.13), Fut9(0.11), B4galt4(0.11), B3gnt7(0.11), B4galt2(0.07), Dpy19l4(0.07), B3galt2(0.06), B3gnt9(0.06), Dpy19l3(0.05), Pigv(0.04), Galnt10(0.02), B4galt5(0.01), Uggt1(0.01), Dpy19l1(0), B3glct(0), Fut4(-0.01), Pigm(-0.02), Galnt14(-0.04), Glt8d1(-0.04), B3gnt2(-0.05), Fut11(-0.06), A…
inositol phosphoceramide synthase activity	0.160921	0.138965	0.0527052	0.21094	47	0.0261476	0.106961	0.273036	0.706189	0.353587	B3galt1(0.56), Galnt15(0.51), Galnt16(0.48), Wbscr17(0.22), B4galt1(0.18), Galnt12(0.17), B4galt3(0.15), B3gnt3(0.13), Fut9(0.11), B4galt4(0.11), B3gnt7(0.11), B4galt2(0.07), Dpy19l4(0.07), B3galt2(0.06), B3gnt9(0.06), Dpy19l3(0.05), Pigv(0.04), Galnt10(0.02), B4galt5(0.01), Uggt1(0.01), Dpy19l1(0), B3glct(0), Fut4(-0.01), Pigm(-0.02), Galnt14(-0.04), Glt8d1(-0.04), B3gnt2(-0.05), Fut11(-0.06), A…
indole-3-butyrate beta-glucosyltransferase activity	0.160921	0.138965	0.0527052	0.21094	47	0.0261476	0.106961	0.273036	0.706189	0.353587	B3galt1(0.56), Galnt15(0.51), Galnt16(0.48), Wbscr17(0.22), B4galt1(0.18), Galnt12(0.17), B4galt3(0.15), B3gnt3(0.13), Fut9(0.11), B4galt4(0.11), B3gnt7(0.11), B4galt2(0.07), Dpy19l4(0.07), B3galt2(0.06), B3gnt9(0.06), Dpy19l3(0.05), Pigv(0.04), Galnt10(0.02), B4galt5(0.01), Uggt1(0.01), Dpy19l1(0), B3glct(0), Fut4(-0.01), Pigm(-0.02), Galnt14(-0.04), Glt8d1(-0.04), B3gnt2(-0.05), Fut11(-0.06), A…
salicylic acid glucosyltransferase (ester-forming) activity	0.160921	0.138965	0.0527052	0.21094	47	0.0261476	0.106961	0.273036	0.706189	0.353587	B3galt1(0.56), Galnt15(0.51), Galnt16(0.48), Wbscr17(0.22), B4galt1(0.18), Galnt12(0.17), B4galt3(0.15), B3gnt3(0.13), Fut9(0.11), B4galt4(0.11), B3gnt7(0.11), B4galt2(0.07), Dpy19l4(0.07), B3galt2(0.06), B3gnt9(0.06), Dpy19l3(0.05), Pigv(0.04), Galnt10(0.02), B4galt5(0.01), Uggt1(0.01), Dpy19l1(0), B3glct(0), Fut4(-0.01), Pigm(-0.02), Galnt14(-0.04), Glt8d1(-0.04), B3gnt2(-0.05), Fut11(-0.06), A…
salicylic acid glucosyltransferase (glucoside-forming) activity	0.160921	0.138965	0.0527052	0.21094	47	0.0261476	0.106961	0.273036	0.706189	0.353587	B3galt1(0.56), Galnt15(0.51), Galnt16(0.48), Wbscr17(0.22), B4galt1(0.18), Galnt12(0.17), B4galt3(0.15), B3gnt3(0.13), Fut9(0.11), B4galt4(0.11), B3gnt7(0.11), B4galt2(0.07), Dpy19l4(0.07), B3galt2(0.06), B3gnt9(0.06), Dpy19l3(0.05), Pigv(0.04), Galnt10(0.02), B4galt5(0.01), Uggt1(0.01), Dpy19l1(0), B3glct(0), Fut4(-0.01), Pigm(-0.02), Galnt14(-0.04), Glt8d1(-0.04), B3gnt2(-0.05), Fut11(-0.06), A…
benzoic acid glucosyltransferase activity	0.160921	0.138965	0.0527052	0.21094	47	0.0261476	0.106961	0.273036	0.706189	0.353587	B3galt1(0.56), Galnt15(0.51), Galnt16(0.48), Wbscr17(0.22), B4galt1(0.18), Galnt12(0.17), B4galt3(0.15), B3gnt3(0.13), Fut9(0.11), B4galt4(0.11), B3gnt7(0.11), B4galt2(0.07), Dpy19l4(0.07), B3galt2(0.06), B3gnt9(0.06), Dpy19l3(0.05), Pigv(0.04), Galnt10(0.02), B4galt5(0.01), Uggt1(0.01), Dpy19l1(0), B3glct(0), Fut4(-0.01), Pigm(-0.02), Galnt14(-0.04), Glt8d1(-0.04), B3gnt2(-0.05), Fut11(-0.06), A…
chondroitin hydrolase activity	0.160921	0.138965	0.0527052	0.21094	47	0.0261476	0.106961	0.273036	0.706189	0.353587	B3galt1(0.56), Galnt15(0.51), Galnt16(0.48), Wbscr17(0.22), B4galt1(0.18), Galnt12(0.17), B4galt3(0.15), B3gnt3(0.13), Fut9(0.11), B4galt4(0.11), B3gnt7(0.11), B4galt2(0.07), Dpy19l4(0.07), B3galt2(0.06), B3gnt9(0.06), Dpy19l3(0.05), Pigv(0.04), Galnt10(0.02), B4galt5(0.01), Uggt1(0.01), Dpy19l1(0), B3glct(0), Fut4(-0.01), Pigm(-0.02), Galnt14(-0.04), Glt8d1(-0.04), B3gnt2(-0.05), Fut11(-0.06), A…
dolichyl-pyrophosphate Man7GlcNAc2 alpha-1,6-mannosyltransferase activity	0.160921	0.138965	0.0527052	0.21094	47	0.0261476	0.106961	0.273036	0.706189	0.353587	B3galt1(0.56), Galnt15(0.51), Galnt16(0.48), Wbscr17(0.22), B4galt1(0.18), Galnt12(0.17), B4galt3(0.15), B3gnt3(0.13), Fut9(0.11), B4galt4(0.11), B3gnt7(0.11), B4galt2(0.07), Dpy19l4(0.07), B3galt2(0.06), B3gnt9(0.06), Dpy19l3(0.05), Pigv(0.04), Galnt10(0.02), B4galt5(0.01), Uggt1(0.01), Dpy19l1(0), B3glct(0), Fut4(-0.01), Pigm(-0.02), Galnt14(-0.04), Glt8d1(-0.04), B3gnt2(-0.05), Fut11(-0.06), A…
cytokinin 9-beta-glucosyltransferase activity	0.160921	0.138965	0.0527052	0.21094	47	0.0261476	0.106961	0.273036	0.706189	0.353587	B3galt1(0.56), Galnt15(0.51), Galnt16(0.48), Wbscr17(0.22), B4galt1(0.18), Galnt12(0.17), B4galt3(0.15), B3gnt3(0.13), Fut9(0.11), B4galt4(0.11), B3gnt7(0.11), B4galt2(0.07), Dpy19l4(0.07), B3galt2(0.06), B3gnt9(0.06), Dpy19l3(0.05), Pigv(0.04), Galnt10(0.02), B4galt5(0.01), Uggt1(0.01), Dpy19l1(0), B3glct(0), Fut4(-0.01), Pigm(-0.02), Galnt14(-0.04), Glt8d1(-0.04), B3gnt2(-0.05), Fut11(-0.06), A…
nuclear-transcribed mRNA catabolic process	0.198214	0.231389	0.0528865	0.211426	14	0.228326	0.168983	0.381539	0.18523	0.236626	Rc3h1(0.33), Xrn1(0.22), Lsm5(0.09), Thrap3(0.08), Upf1(0.04), Ptbp1(0), Exosc10(0), Nbas(-0.03), Ago1(-0.06), Dhx34(-0.2), Lsm4(-0.24), Exosc9(-0.24), Exosc4(-0.44), Mrto4(-0.53),
cellular protein modification process	0.192335	0.145908	0.0529515	0.211447	39	0.0603443	0.153292	0.269231	0.390874	0.440784	Parp4(0.43), Ero1lb(0.39), Rimklb(0.31), Loxl2(0.24), Fbxo11(0.23), Pcmtd1(0.19), Pcmtd2(0.16), Ube2i(0.12), Ttll3(0.12), St3gal6(0.11), Adprh(0.07), Adprh(0.07), Uba1(0.07), Stk38(0.06), Ttl(0.05), Tsg101(0.02), Ttll13(0), Pcmt1(-0.01), Ttll10(-0.01), Ero1l(-0.02), Ttll4(-0.04), Wdyhv1(-0.04), Rimkla(-0.04), Uevld(-0.06), Atg3(-0.09), Uba6(-0.09), Ubl5(-0.1), Man2b1(-0.11), Ttll5(-0.12), Ttll7(-…
vesicle fusion with Golgi apparatus	0.204442	0.293888	0.0532791	0.212516	10	0.531738	0.204454	0.0862819	0.251257	0.203844	Stx5a(0.18), Gosr2(0.11), Sec22b(-0.01), Uso1(-0.01), Sec22c(-0.05), Vti1b(-0.09), Sec22a(-0.12), Vti1a(-0.13), Vti1a(-0.13), Bet1(-0.18),
regulation of double-strand break repair via homologous recombination	0.201914	0.226679	0.0544543	0.216959	15	0.085084	0.161535	0.280026	0.337836	0.411492	Kdm1a(0.17), Spidr(0.16), Fignl2(0.1), Fign(0.08), Ppp4r2(0.03), Ppp4c(-0.04), Chek1(-0.05), Terf2ip(-0.06), Rtel1(-0.1), Tex15(-0.11), Rpa2(-0.14), Rad51(-0.21), Sirt6(-0.22), Fignl1(-0.54), Fignl1(-0.54),
transferase activity, transferring acyl groups other than amino-acyl groups	0.141567	0.266089	0.0547071	0.217721	18	0.640802	0.468853	0.182683	0.0488525	0.0966723	Kat6a(0.31), Kat6b(0.19), Elovl6(0.07), Scp2(0.04), Acaa2(0.04), Kat5(0.02), Acaa1a(0.01), Kat7(-0.01), Acat2(-0.05), Acat1(-0.1), Dgat2(-0.12), Oxsm(-0.13), Hadhb(-0.15), Kat8(-0.21), Acaa1b(-0.27), Elovl2(-0.28), Mogat1(-0.38), Mogat2(-0.49),
dolichyl-phosphate-glucose-glycolipid alpha-glucosyltransferase activity	0.163047	0.137859	0.0548201	0.217925	48	0.0260984	0.119886	0.265663	0.701538	0.358277	B3galt1(0.56), Galnt15(0.51), Galnt16(0.48), Wbscr17(0.22), B4galt1(0.18), Galnt12(0.17), B4galt3(0.15), B3gnt3(0.13), Fut9(0.11), B4galt4(0.11), B3gnt7(0.11), B4galt2(0.07), Dpy19l4(0.07), B3galt2(0.06), B3gnt9(0.06), Dpy19l3(0.05), Alg10b(0.05), Pigv(0.04), Galnt10(0.02), B4galt5(0.01), Uggt1(0.01), Dpy19l1(0), B3glct(0), Fut4(-0.01), Pigm(-0.02), Galnt14(-0.04), Glt8d1(-0.04), B3gnt2(-0.05), F…
magnesium ion binding	0.217709	0.0667479	0.0553262	0.21969	172	0.349547	0.164732	0.109085	0.327314	0.299224	Nt5c1a(0.72), Hpgds(0.5), Map3k8(0.48), Irak3(0.4), Irak3(0.4), Mast4(0.38), Atp10a(0.37), Gem(0.37), Glul(0.37), Brsk1(0.37), Sphk1(0.36), Cerk(0.36), Map3k5(0.35), Atp8b1(0.32), Mast1(0.32), Rps6ka5(0.31), Sik2(0.31), Sik2(0.31), Abl2(0.3), Abl2(0.3), Map3k6(0.29), Sik1(0.28), Snrk(0.28), Stk26(0.28), Atp8a1(0.27), Mapk12(0.27), Atp8b2(0.27), Rps6ka3(0.27), Inpp1(0.26), Pkm(0.25), Atp11a(0.25),…
cysteine-type endopeptidase activator activity involved in apoptotic process	0.17791	0.259825	0.0561357	0.222655	13	0.320827	0.235873	0.119234	0.411222	0.167832	Apaf1(0.32), Casp8ap2(0.32), Bcl10(0.16), Cdkn1b(0.14), Nkx3-1(0.09), Ctsh(-0.12), Ctsh(-0.12), Mapk9(-0.13), Bad(-0.16), Bad(-0.16), Tnfrsf10b(-0.19), Rps27l(-0.38), Rack1(-0.42),
synaptonemal complex assembly	0.150117	0.27899	0.0566159	0.224308	15	0.0665393	0.108671	0.221634	0.497403	0.486972	Sycp1(1.01), Sycp1(1.01), Sycp1(1.01), Sycp3(0.52), Sycp3(0.52), Ago4(0.31), Syde1(0.2), Bag6(0.06), Ehmt2(-0.08), Tex15(-0.11), Syce2(-0.14), Cpeb1(-0.24), Mlh3(-0.38), Trip13(-0.43), Rec8(-0.8),
2-oxoglutarate metabolic process	0.159556	0.273991	0.0569618	0.225426	14	0.783138	0.292677	0.191819	0.0809624	0.066524	Aadat(0.45), Stat5a(0.1), Ogdh(0.08), Stat5b(0.07), Kyat3(0.01), Idh1(-0.08), Dlst(-0.08), Dld(-0.09), Ghr(-0.09), Idh3g(-0.09), Idh3b(-0.12), Mrps36(-0.2), Idh3a(-0.33), Gpt2(-0.86),
protein homotrimerization	0.168083	0.2114	0.0577567	0.228163	21	0.0499083	0.111241	0.23876	0.592922	0.429207	Arg1(0.57), Alox5ap(0.5), Lcn2(0.45), Hsf4(0.44), Col23a1(0.28), Nell2(0.27), Ski(0.24), Cubn(0.13), Tnfrsf9(0.11), Scara5(0.09), Ogt(-0.04), Traf2(-0.06), Mgst1(-0.12), Mbl1(-0.14), Atxn10(-0.14), Pnpt1(-0.17), Brk1(-0.21), Mif(-0.24), Dut(-0.26), Mlkl(-0.45), Sigmar1(-0.55),
cellular response to interferon-alpha	0.134572	0.33412	0.0577824	0.228163	10	0.115573	0.101589	0.484434	0.39069	0.231989	Star(0.28), Tpr(0.22), Axl(0.17), Ifnar1(0.14), Ifi204(-0.04), Ifit2(-0.31), Gas6(-0.35), Ifit1(-0.43), Ifit3(-0.84), Myc(-1.62),
startle response	0.177623	0.304857	0.0578816	0.228181	11	0.373041	0.354029	0.0763156	0.161829	0.344077	Penk(0.27), Mecp2(0.24), Npas3(0.22), Fabp7(0.2), Csmd1(0.15), Grin2d(0.13), Park2(-0.02), Kcnh1(-0.26), Nrg1(-0.26), Kcna1(-0.75), Kcna1(-0.75),
quinone binding	0.193114	0.265468	0.057916	0.228181	11	0.636701	0.186947	0.194761	0.252914	0.0734096	Aoc3(0.3), Hhipl1(0.07), Aoc2(-0.03), Ndufs2(-0.06), Vkorc1l1(-0.07), Vkorc1(-0.11), Etfdh(-0.11), Sqrdl(-0.13), Cbr4(-0.17), Ndufs7(-0.28), Aoc1(-0.53),
positive regulation of cholesterol esterification	0.115918	0.318778	0.058215	0.229083	11	0.524529	0.434391	0.36646	0.485971	0.0012212	Agtr1a(0.17), Scd1(0.17), Stard4(0.15), Apoe(0.11), Apoe(0.11), Apoa2(-0.01), Apoa4(-0.26), Apoa4(-0.26), Apoa1(-0.5), Apoa1(-0.5), Agt(-0.75),
steroid dehydrogenase activity	0.171775	0.204553	0.0582742	0.229083	22	0.324572	0.488345	0.484245	0.0457789	0.0970689	Akr1c21(0.92), Rdh12(0.79), Kcnab1(0.53), Kcnab2(0.37), H2-Ke6(0.27), Akr1c14(0.22), Hsd17b11(0.21), Bdh2(-0.01), Ctbp1(-0.06), Hsd3b7(-0.06), Aifm1(-0.08), Sdr42e1(-0.08), Rdh14(-0.08), Adh5(-0.09), Rdh1(-0.11), Rdh13(-0.14), Cbr4(-0.17), Sdr39u1(-0.25), Akr1c13(-0.27), Wwox(-0.3), Htatip2(-0.4), Hsd11b2(-0.65),
WASH complex	0.176966	0.309726	0.0587315	0.230624	10	0.253862	0.361325	0.0978234	0.162851	0.41823	Dnajc13(0.12), Fam21(0.07), Capzb(0.01), Capza1(-0.04), A230046K03Rik(-0.05), A230046K03Rik(-0.05), E430025E21Rik(-0.08), Wash1(-0.1), Snx27(-0.17), Ccdc53(-0.34),
cellular response to UV	0.188691	0.149534	0.0592483	0.232395	41	0.263141	0.156387	0.208798	0.394337	0.220941	Crebbp(0.4), Trp53inp1(0.35), Ep300(0.33), Usp47(0.29), Trp63(0.27), Pik3r1(0.19), Pik3r1(0.19), Eif2ak4(0.17), Kdm1a(0.17), Nfatc4(0.15), Casp9(0.09), Aqp1(0.08), Cdc25a(0.08), Ino80(0.08), Fmr1(0.07), Ercc4(0.07), Usp28(0.07), Yy1(0.06), Ptprk(0.05), Zbtb1(0.03), Rnf168(0.02), N4bp1(0.02), N4bp1(0.02), Agap3(-0.06), Atr(-0.06), Pcna(-0.11), Tmem161a(-0.11), Mapk9(-0.13), Bak1(-0.18), Bak1(-0.18…
transcription elongation factor complex	0.196242	0.17994	0.0599185	0.234504	26	0.359939	0.308838	0.0830136	0.284272	0.253006	Ccnl1(0.53), Eaf2(0.42), Aff1(0.34), Supt6(0.27), Aff4(0.24), Ercc6(0.23), Ell2(0.18), Ell(0.17), Ice1(0.11), Tceb3(0.04), Cdk9(0.04), Eaf1(0), Ice2(-0.04), Mllt1(-0.09), Elp4(-0.15), Elp4(-0.15), Elp2(-0.19), Elp2(-0.19), Mllt3(-0.19), Ikbkap(-0.19), Nufip1(-0.24), Nufip1(-0.24), Elof1(-0.26), Elp3(-0.35), Elp3(-0.35), Zc3h8(-0.38),
negative regulation of transcription elongation from RNA polymerase II promoter	0.211812	0.303052	0.0600612	0.234803	10	0.428889	0.36536	0.173344	0.270501	0.080797	Rnf8(0.13), Ezh2(0.12), Rnf168(0.02), Axin1(0.01), Eapp(0), Nelfb(-0.01), Recql5(-0.1), Supt4a(-0.11), Nelfa(-0.15), Nelfe(-0.22),
spindle organization	0.111108	0.265613	0.060221	0.235068	18	0.085388	0.0669099	0.114791	0.550141	0.681502	Pcnt(0.41), Spag5(0.26), Spag5(0.26), Aspm(0.23), Chd3(0.23), Ckap5(0.21), Rgs14(0.02), Rgs14(0.02), Kiz(0.01), Kiz(0.01), Uvrag(-0.06), Cep72(-0.08), Kif11(-0.16), Aurka(-0.18), Knstrn(-0.25), Ntmt1(-0.42), Ranbp1(-0.44), Aurkb(-0.6),
alpha-mannosidase activity	0.201467	0.34021	0.0602898	0.235068	10	0.184128	0.422242	0.248741	0.191538	0.204815	Man2a1(0.22), Man2a2(0.21), Man2c1(0.04), Man2c1(0.04), Manea(-0.05), Man2b1(-0.11), Man2b1(-0.11), Man2b1(-0.11), Man2b2(-0.12), Man2b2(-0.12),
acetylgalactosaminyltransferase activity	0.199017	0.115572	0.0606649	0.235945	59	0.0754351	0.144709	0.200465	0.607156	0.34449	B3galt1(0.56), Galnt15(0.51), Galnt16(0.48), Csgalnact1(0.41), Wbscr17(0.22), B4galt1(0.18), Galnt12(0.17), B4galt3(0.15), B3gnt3(0.13), Csgalnact2(0.13), Csgalnact2(0.13), Fut9(0.11), B4galt4(0.11), Chsy3(0.11), B3gnt7(0.11), B4galnt3(0.08), B4galnt3(0.08), B4galt2(0.07), Dpy19l4(0.07), B3galt2(0.06), B3gnt9(0.06), Dpy19l3(0.05), Chsy1(0.05), Pigv(0.04), Galnt10(0.02), B4galt5(0.01), Uggt1(0.01)…
negative regulation of substrate adhesion-dependent cell spreading	0.185132	0.237201	0.0606867	0.235945	14	0.136958	0.13922	0.454494	0.302645	0.256329	Efna5(0.46), Kank1(0.25), Tacstd2(0.22), Actn4(0.16), Fbln1(0.11), Ap1ar(-0.04), Ap1ar(-0.04), Coro1c(-0.08), Dmtn(-0.12), Postn(-0.16), Itgb1bp1(-0.21), Itgb1bp1(-0.21), Rcc2(-0.48), Mfi2(-0.89),
glucose metabolic process	0.172814	0.127878	0.0607658	0.235993	55	0.0742009	0.348281	0.51246	0.414691	0.0745311	Hk2(0.79), Fabp5(0.35), Apod(0.32), Igfbp5(0.28), Pik3ca(0.28), Pkm(0.25), Tcf7l2(0.23), Pik3r1(0.19), Pgm1(0.18), Igf2(0.16), Pgm5(0.11), Pdk1(0.09), Cpt1a(0.07), Usf1(0.07), Tfap2b(0.06), Pgm2l1(0.06), Pck1(0.05), Ganc(0.05), Inppl1(0.04), Npy1r(0.04), Pdk4(0.04), Cacna1a(0.03), H6pd(0.03), Akt2(0.02), Dcxr(0.02), Dcxr(0.02), Prkaa1(0.02), Mapk14(0), Slc2a8(-0.01), Pdha1(-0.02), Pdk2(-0.03), Pd…
potassium ion leak channel activity	0.124698	0.349291	0.0611027	0.237041	10	0.0465376	0.117478	0.650913	0.545024	0.137894	Kcnk6(0.22), Kcnk3(0.2), Kcnk3(0.2), Kcnk5(0.03), Kcnk1(-0.12), Kcnk1(-0.12), Kcnk2(-0.14), Kcnk2(-0.14), Tmem175(-0.23), Tmem175(-0.23),
U2-type prespliceosome	0.2174	0.24887	0.0612021	0.237166	15	0.26591	0.157636	0.268624	0.370418	0.19024	Sf3b1(0.29), Prpf39(0.28), Luc7l2(0.21), Luc7l3(0.07), Snrnp70(0.04), Prpf40b(0.01), Luc7l(0.01), Prpf40a(0), Sf3a1(-0.07), U2af2(-0.12), U2af2(-0.12), Snrpn(-0.13), Snrpb(-0.17), Sf3a2(-0.18), Snrpg(-0.33),
poly(A) binding	0.21661	0.269813	0.062391	0.241245	12	0.198593	0.265087	0.152236	0.307169	0.334617	Ddx3x(0.26), Paip2b(0.2), Pabpn1(0.08), Syncrip(0.08), Paip2(-0.03), Khdrbs1(-0.06), Zc3h14(-0.08), Ddx1(-0.1), Eif4a3(-0.14), Pabpc1(-0.17), Rbpms(-0.19), Pabpc4(-0.19),
UDP-glucose:glycoprotein glucosyltransferase activity	0.154091	0.140089	0.0624788	0.241321	49	0.015076	0.0949493	0.335344	0.76494	0.401721	B3galt1(0.56), Galnt15(0.51), Galnt16(0.48), Uggt2(0.33), Wbscr17(0.22), B4galt1(0.18), Galnt12(0.17), B4galt3(0.15), B3gnt3(0.13), Fut9(0.11), B4galt4(0.11), B3gnt7(0.11), B4galt2(0.07), Dpy19l4(0.07), B3galt2(0.06), B3gnt9(0.06), Dpy19l3(0.05), Pigv(0.04), Galnt10(0.02), B4galt5(0.01), Uggt1(0.01), Uggt1(0.01), Dpy19l1(0), B3glct(0), Fut4(-0.01), Pigm(-0.02), Galnt14(-0.04), Glt8d1(-0.04), B3gn…
aspartic endopeptidase activity, intramembrane cleaving	0.213861	0.280778	0.062974	0.242968	11	0.481392	0.314569	0.169635	0.123986	0.217312	Asprv1(0.59), Sppl2a(0.06), Sppl2a(0.06), Sppl3(0.05), Sppl3(0.05), Psen1(-0.02), H13(-0.08), H13(-0.08), Psen2(-0.15), Sppl2b(-0.21), Napsa(-0.22),
DNA replication-independent nucleosome assembly	0.220628	0.237119	0.0633075	0.243989	13	0.415043	0.264316	0.107988	0.291654	0.216155	Ubn1(0.3), Atrx(0.29), Nasp(0.01), Cabin1(0), Cabin1(0), Rbbp4(-0.02), Hat1(-0.08), Asf1a(-0.11), Hira(-0.26), Asf1b(-0.27), Hist1h4h(-0.39), Ipo4(-0.47), Hist1h4i(-0.68),
acylglycerol lipase activity	0.139575	0.327056	0.0635582	0.244689	11	0.431076	0.427176	0.315649	0.451076	0.00711836	Mgll(0.19), Mgll(0.19), Mgll(0.19), Lipe(0.12), Abhd2(0.02), Faah(-0.05), Abhd12(-0.11), Abhd12(-0.11), Abhd6(-0.14), Abhd6(-0.14), Abhd6(-0.14),
protein localization to cilium	0.156843	0.239164	0.0638059	0.245228	21	0.0677098	0.336957	0.265184	0.266079	0.404841	Tulp4(0.26), Bbs1(0.12), Bbs1(0.12), Csnk1d(0.12), Rab11fip3(0.11), Bbs4(0.1), Ift122(0.08), Ift122(0.08), Tbc1d32(0.02), Snx10(0), Wdr19(0), Bbs9(0), Ift140(-0.01), Arf4(-0.07), Atp6v1d(-0.07), Ttc21b(-0.08), Wdr35(-0.12), Arl6(-0.15), Ehd1(-0.16), Ift20(-0.18), Ift20(-0.18),
dihydrotestosterone 17-beta-dehydrogenase activity	0.16331	0.220417	0.063837	0.245228	20	0.335123	0.415943	0.690419	0.0431811	0.0605314	Akr1c21(0.92), Rdh12(0.79), Kcnab1(0.53), Akr1c18(0.44), Kcnab2(0.37), H2-Ke6(0.27), Bdh2(-0.01), Ctbp1(-0.06), Hsd3b7(-0.06), Aifm1(-0.08), Sdr42e1(-0.08), Rdh14(-0.08), Adh5(-0.09), Rdh13(-0.14), Cbr4(-0.17), Sdr39u1(-0.25), Akr1c13(-0.27), Wwox(-0.3), Htatip2(-0.4), Hsd11b2(-0.65),
sperm midpiece	0.176847	0.263588	0.0640604	0.24582	12	0.749674	0.303535	0.270729	0.0556214	0.0871905	Grk3(0.4), Ift172(0.06), Slc9a3r1(-0.03), Gabarap(-0.07), Rabl2(-0.08), Slc26a6(-0.08), Cd52(-0.09), Ift81(-0.16), Ace(-0.21), Sqstm1(-0.21), Pacrg(-0.34), Ift27(-0.36),
autolysosome	0.142442	0.336352	0.06576	0.252068	11	0.660991	0.470215	0.145963	0.170551	0.0439264	Lrrk2(0.23), Map1lc3b(0.08), Lamp2(-0.03), Map1lc3a(-0.07), Ncoa4(-0.1), Pik3c3(-0.1), Lamp1(-0.15), Ftl1(-0.16), Sqstm1(-0.21), Sqstm1(-0.21), Fth1(-0.27),
hydrogen-exporting ATPase activity, phosphorylative mechanism	0.165824	0.285756	0.0662286	0.253316	13	0.432554	0.250412	0.238941	0.139645	0.232871	Atp6v1g3(0.32), Atp6v0d2(0.14), Atp6v1g2(0.07), Atp6v0c(0.02), Atp6v0a4(-0.04), Atp6v1c2(-0.07), Atp6v1e1(-0.09), Atp6v0d1(-0.11), Atp6v1g1(-0.11), Atp6v1c1(-0.11), Atp5e(-0.12), Atp6v0b(-0.17), Atp5l(-0.2),
nucleophagy	0.182511	0.266388	0.0666853	0.254787	15	0.662351	0.288987	0.176742	0.191264	0.0781469	Wipi1(0.35), Atg2a(0.15), Atg12(0.09), Trappc8(0.03), Atg2b(0.01), Atg4d(0.01), Wipi2(0), Becn1(-0.02), Atg4a(-0.07), Atg3(-0.09), Wdr45(-0.1), Atg4b(-0.12), Wdr45b(-0.12), Atg4c(-0.2), Atg5(-0.3),
regulation of autophagosome assembly	0.214497	0.242185	0.0667901	0.254912	16	0.34652	0.304642	0.0810304	0.217801	0.393291	Mtmr3(0.17), Rab20(0.15), Rab33b(0.12), Pikfyve(0.11), Tbc1d12(0.08), Ambra1(0.08), Ubqln2(0.06), Rnf5(-0.04), Ift88(-0.05), Rab7(-0.06), Tbc1d14(-0.07), Tbc1d14(-0.07), Rab1b(-0.14), Nprl3(-0.16), Ift20(-0.18), Nprl2(-0.22),
organic anion transport	0.0508936	0.406216	0.0671496	0.256008	14	0.92607	0.771151	0.118463	0.00349294	0.0486833	Slco4a1(0.58), Slco4c1(0.24), Slco2b1(0.18), Abcc5(0.08), Slco1a1(0.03), Slc22a7(-0.08), Slc22a7(-0.08), Slco3a1(-0.16), Slc22a6(-0.21), Slc22a6(-0.21), Slc22a6(-0.21), Slc22a6(-0.21), Slc17a3(-0.25), Slc22a19(-0.28),
negative regulation of myelination	0.182201	0.31225	0.0678275	0.258314	10	0.268514	0.203389	0.0966284	0.236438	0.551366	Eif2ak3(0.24), Pten(0.02), Tnfrsf21(0.01), Tnfrsf21(0.01), Fig4(-0.1), Fig4(-0.1), Mtmr2(-0.14), Mtmr2(-0.14), Tnf(-0.19), Klk8(-0.19),
regulation of mitochondrial membrane permeability	0.230679	0.246266	0.0682563	0.259389	12	0.409913	0.329128	0.117996	0.273716	0.191461	Bcl2(0.24), Stat3(0.21), Plekhf1(0.19), Htt(0.15), Cnp(0.07), Bcl2l1(0.06), Bnip3(-0.09), Bad(-0.16), Bak1(-0.18), Ppif(-0.52), Ppif(-0.52), Ppif(-0.52),
transferase activity, transferring glycosyl groups	0.16276	0.0705893	0.0683326	0.2594	176	0.00916025	0.263556	0.355607	0.475426	0.537988	Has2(1.55), B3gnt5(1.15), Has1(0.96), A3galt2(0.68), Gys2(0.66), St3gal1(0.63), Sec1(0.63), Art3(0.59), B3galt1(0.56), Galnt11(0.56), Galnt15(0.51), Galnt16(0.48), B3galnt1(0.46), Gcnt4(0.45), B4galt6(0.44), Xylt1(0.43), Has3(0.42), St8sia4(0.41), Upp2(0.41), Tiparp(0.39), Gcnt2(0.38), Galnt6(0.38), Pygl(0.35), St6gal1(0.33), Mgat5(0.33), Gxylt1(0.33), St6galnac4(0.28), Gxylt2(0.27), Tnks(0.23), …
cell projection organization	0.163816	0.0966887	0.0686623	0.260372	125	0.0467707	0.23869	0.435521	0.228128	0.489022	P2ry12(0.74), Crocc(0.74), Ccno(0.69), Foxj1(0.67), Plek(0.65), Flna(0.42), Itga8(0.39), Tubb4a(0.34), Tchp(0.28), Gsn(0.28), Boc(0.25), Tctn1(0.24), Ahi1(0.23), Tsc1(0.23), Tmem67(0.23), Dync2h1(0.22), Ptpdc1(0.22), Asap1(0.21), Cep290(0.2), Trove2(0.19), Stk36(0.19), Ocrl(0.18), Cfap54(0.18), Cep152(0.17), Ccp110(0.17), Cep162(0.16), Ick(0.15), Cul3(0.14), Ehd3(0.12), Mark4(0.12), Hap1(0.11), B…
COPI-coated vesicle	0.182915	0.318848	0.0688596	0.260841	11	0.124116	0.122619	0.348819	0.652481	0.15722	1190002N15Rik(0.31), Pacsin1(0.1), Pacs1(0.07), Copb1(-0.01), Arcn1(-0.01), Tmed10(-0.03), Arf1(-0.04), Copz2(-0.05), Ccdc115(-0.09), Tmed2(-0.1), Cope(-0.11),
metalloaminopeptidase activity	0.194128	0.271554	0.0713411	0.269663	13	0.347569	0.472522	0.0649928	0.0703823	0.567548	Lnpep(0.33), Enpep(0.14), Enpep(0.14), 2010111I01Rik(0.13), Xpnpep1(0.01), Rnpepl1(-0.01), Npepps(-0.04), Rnpep(-0.1), Rnpep(-0.1), Lta4h(-0.16), Anpep(-0.17), Dnpep(-0.21), Erap1(-0.23),
negative regulation of viral transcription	0.180656	0.307028	0.071951	0.271678	12	0.244322	0.308842	0.171836	0.528989	0.114679	Trim8(0.1), Trim62(0.07), Trim14(0.06), Trim11(0.06), Trim11(0.06), Trim13(0.04), Mid2(0), Trim21(-0.12), Ifitm3(-0.12), Trim32(-0.14), Trim27(-0.24), Trim27(-0.24),
histone acetylation	0.191776	0.161593	0.0721795	0.27225	28	0.343667	0.230288	0.216272	0.212348	0.294398	Crebbp(0.4), Ep300(0.33), Kat6a(0.31), Nat8f3(0.29), Mecp2(0.24), Taf1(0.22), Trrap(0.21), Kat6b(0.19), Kat2b(0.12), Ing5(0.11), Meaf6(0.02), Kat5(0.02), Bmi1(-0.01), Pcgf2(-0.01), Ing4(-0.05), Hat1(-0.08), Hnf1a(-0.14), Mrgbp(-0.15), Csrp2bp(-0.2), Mbd3(-0.21), Kat8(-0.21), Wdr75(-0.23), Tada2a(-0.24), Ruvbl1(-0.39), Supt3(-0.42), Mettl8(-0.42), Kat2a(-0.48), Ruvbl2(-0.51),
translation factor activity, RNA binding	0.197459	0.257555	0.0732137	0.275857	13	0.551681	0.149995	0.350616	0.158868	0.169021	Sox11(0.57), Cpeb4(0.51), Cpeb2(0.31), Cpeb3(0.2), Cpeb3(0.2), Eif4g2(-0.06), Cpeb1(-0.24), Eef2k(-0.27), Eif2s3x(-0.31), Gtf2h3(-0.31), Mtif3(-0.35), Mtif3(-0.35), Eif2b3(-0.39),
proteolysis	0.199042	0.0481665	0.073381	0.276194	407	0.41175	0.312153	0.370764	0.147582	0.124007	Mmp8(1.13), Adamts4(0.97), Prss27(0.94), Prss22(0.92), Mmp25(0.83), Adamts9(0.74), Adamts9(0.74), Adam8(0.71), Mmp3(0.65), Mmp3(0.65), F10(0.62), Htra4(0.6), Mmp9(0.59), Asprv1(0.59), Pgpep1l(0.58), Adamts1(0.57), Mmp19(0.57), Tnfaip3(0.54), Rhbdl1(0.54), Corin(0.53), Plat(0.51), Tll1(0.5), Lonrf3(0.49), Cbl(0.48), Cndp1(0.48), Cndp1(0.48), Cndp1(0.48), Hgf(0.46), Zc3h12a(0.46), Cflar(0.45), Mmp1…
neuromuscular process	0.210116	0.187624	0.0738219	0.277558	23	0.146501	0.163736	0.542373	0.386188	0.152923	Kcnab2(0.37), Stra6(0.37), Mecp2(0.24), Uchl1(0.2), Atxn2(0.09), Hoxd10(0.07), Fgf12(0.04), Cacna1a(0.03), Cacna1a(0.03), Spg20(0.01), Pex5(-0.02), Hoxc10(-0.02), Ighmbp2(-0.07), Agtpbp1(-0.07), Agtpbp1(-0.07), Hoxa1(-0.09), Aars(-0.13), Hexb(-0.14), Opa3(-0.19), Rac3(-0.42), Pomk(-0.48), Kcna1(-0.75), Kcna1(-0.75),
histone H2A monoubiquitination	0.208014	0.253789	0.0739418	0.277713	13	0.408782	0.141832	0.347714	0.229651	0.211451	Rybp(0.39), Bcor(0.28), Rnf2(0.11), Rnf168(0.02), Ddb2(-0.06), Pcgf1(-0.07), Cul4b(-0.07), Ring1(-0.08), Ddb1(-0.1), Kdm2b(-0.12), Skp1a(-0.25), Trim37(-0.34), Trim37(-0.34),
positive regulation of triglyceride biosynthetic process	0.223851	0.201789	0.0740422	0.277795	19	0.256322	0.487434	0.271518	0.0796407	0.297313	Acsl6(0.72), Tcf7l2(0.23), Dgat1(0.2), Scarb1(0.17), Cnep1r1(0.1), Srebf1(0.09), Srebf1(0.09), Ldlr(0.08), Nr1h2(-0.01), Gpld1(-0.02), Ctdnep1(-0.1), Dgat2(-0.12), Acsl5(-0.14), Gpam(-0.16), Rgn(-0.16), Nr1h3(-0.27), Plin5(-0.55), Plin5(-0.55), Apoc3(-0.59),
protein localization to membrane	0.195876	0.25269	0.0746254	0.279687	14	0.373414	0.0747894	0.244573	0.563117	0.176657	Sh3pxd2b(0.57), Ager(0.42), Fermt2(0.34), Tiam1(0.31), Ap3d1(0.1), Pacsin1(0.1), Cln3(0.07), Hgs(-0.06), Rab29(-0.16), Hps6(-0.19), Hps6(-0.19), Rab38(-0.52), Rab38(-0.52), Cpe(-0.56),
programmed cell death	0.206172	0.195981	0.0755181	0.282486	23	0.144015	0.121733	0.224464	0.607268	0.309627	Gsdma(0.73), Stk17b(0.48), Casp4(0.43), P2rx7(0.32), P2rx7(0.32), Ripk3(0.28), Pkm(0.25), Ripk1(0.08), Trpm7(0.08), Relt(0.08), Pdcd5(0.05), Gsdmd(0.02), Dnm1l(0.01), Gas1(-0.03), Gatad2a(-0.08), Rnf130(-0.14), Eda2r(-0.16), Pgam5(-0.37), Mlkl(-0.45), Alkbh7(-0.46), Trp53(-0.49), Ppif(-0.52), Gsdmc2(-1.09),
negative regulation of cell cycle arrest	0.196746	0.249027	0.0755318	0.282486	13	0.651802	0.208238	0.203234	0.118124	0.21958	Cast(0.25), Mdm4(0.24), Mdm2(0.07), Cdk9(0.04), Mlxipl(0.03), Gper1(0.03), Ccnk(0.02), Ccnd1(-0.05), Mif(-0.24), Cdk4(-0.35), Chek2(-0.51), Nupr1l(-0.59), Tfap4(-0.64),
positive regulation of proteolysis	0.193359	0.198049	0.0762241	0.283737	22	0.476473	0.498134	0.0982447	0.126788	0.241133	Mgea5(0.41), Ep300(0.33), Hspa8(0.24), Fbxw11(0.17), Fgfr4(0.16), Tbc1d10a(0.16), Ist1(0.05), Cyfip2(0.05), Btrc(-0.03), Ogt(-0.04), Plk1(-0.07), Asph(-0.08), Hdac2(-0.09), Casp8(-0.13), Perp(-0.13), Trim32(-0.14), Bad(-0.16), Bak1(-0.18), Aurkaip1(-0.21), Cln6(-0.23), Cln6(-0.23), Fadd(-0.25),
spindle pole centrosome	0.200358	0.268582	0.0762674	0.283737	11	0.241128	0.314956	0.116701	0.533478	0.182246	Cep250(0.43), Rock2(0.34), Bnip2(0.13), Nde1(0.03), Fam175b(-0.14), Tbccd1(-0.17), Aurka(-0.18), Aurka(-0.18), Nubp2(-0.3), Npm1(-0.47), Aurkb(-0.6),
oligodendrocyte development	0.215429	0.228779	0.0763387	0.283737	14	0.437936	0.259946	0.407359	0.228971	0.0775729	Myrf(0.34), Tgfb1(0.28), Tcf7l2(0.23), Med12(0.23), Fgfr3(0.12), Id2(0.07), Wasf3(-0.13), Eif2b2(-0.19), Kcnj10(-0.2), Eif2b5(-0.21), Eif2b4(-0.22), Hdac11(-0.22), Eif2b1(-0.3), Eif2b3(-0.39),
dorsal/ventral neural tube patterning	0.233319	0.20905	0.0779611	0.289126	18	0.298323	0.409066	0.179009	0.27835	0.182276	Tctn1(0.24), Ptch1(0.15), Rab23(0.11), Tulp3(0.03), Kif3a(0.02), Kif3a(0.02), Bmp4(0.01), Psen1(-0.02), Gas1(-0.03), Gas1(-0.03), Foxa1(-0.12), Psen2(-0.15), Fkbp8(-0.19), Fkbp8(-0.19), Fkbp8(-0.19), Smo(-0.26), Gli2(-0.33), Gli2(-0.33),
Golgi to endosome transport	0.231968	0.247973	0.0791193	0.292808	13	0.263351	0.309234	0.1441	0.366066	0.267728	Ap4m1(0.11), Gbf1(0.11), Sort1(0.09), Rbsn(0.03), Klhl20(0.03), Klhl20(0.03), Kif16b(0), Rab14(-0.05), Tgoln1(-0.06), Eps15(-0.09), Sys1(-0.1), Rab29(-0.16), Slc30a6(-0.29),
cilium	0.128613	0.0837415	0.0793061	0.293145	190	0.00903526	0.110684	0.80986	0.31594	0.514544	Tub(0.7), Rapgef4(0.63), Pde1c(0.62), Dnah12(0.6), Dnah17(0.58), Gpr161(0.49), Gli3(0.43), Gli3(0.43), Cep250(0.43), Grk3(0.4), Tubb4a(0.34), Anxa1(0.33), Calcr(0.32), Pkd2(0.3), Pkd2(0.3), Hk1(0.29), Ccsap(0.29), Adcy3(0.29), Notch2(0.28), Rttn(0.28), Kif7(0.26), Kif7(0.26), Tulp4(0.26), Pkm(0.25), Pkd1(0.25), Trim59(0.25), Catsper2(0.25), Odf2(0.23), Ccdc39(0.23), Ahi1(0.23), Ahi1(0.23), Tmem67…
serine-type peptidase activity	0.173081	0.129296	0.0794378	0.293145	70	0.682521	0.404401	0.346991	0.0351789	0.118991	Prss27(0.94), Prss22(0.92), F10(0.62), Htra4(0.6), Rhbdl1(0.54), Corin(0.53), Plat(0.51), Reln(0.45), St14(0.41), St14(0.41), Rhbdl3(0.41), Hgfac(0.33), Masp1(0.27), Tmprss9(0.23), Tmprss9(0.23), Rhbdl2(0.21), C1s1(0.19), Pcsk5(0.17), Furin(0.15), Tpp2(0.15), Klk1(0.12), Apeh(0.12), Pcsk7(0.09), Dpp8(0.07), C1ra(0.05), Prss23(0.04), Klk1b5(0.03), Mbtps1(0.01), Sec11c(0.01), Dpp4(0), Dpp9(0), Sec1…
regulation of sodium ion transmembrane transporter activity	0.15404	0.284785	0.0794589	0.293145	13	0.133448	0.100828	0.542561	0.463237	0.218429	Fxyd5(0.27), Fxyd4(0.16), Fxyd1(0.14), Ptpn3(0.07), Fgf12(0.04), Scn1b(0.03), Scn2b(0.02), Fxyd2(-0.14), Ywhah(-0.18), Ywhah(-0.18), Cav3(-0.19), Scn4b(-0.25), Gpd1l(-0.36),
spindle microtubule	0.166628	0.178654	0.0800359	0.294076	34	0.176827	0.355874	0.121055	0.533827	0.223799	Parp4(0.43), Birc5(0.33), Spag5(0.26), Tbl1xr1(0.21), Ncor1(0.14), Clasp1(0.14), Csnk1d(0.12), Numa1(0.11), Tbl1x(0.08), Kif2a(0.06), Cdc27(0.03), Kif3a(0.02), Capn6(0.01), Ska2(-0.02), Hdac3(-0.03), Sept2(-0.05), Nlrc4(-0.06), Plk1(-0.07), Arl3(-0.07), Nusap1(-0.07), Kifap3(-0.08), Tubg2(-0.14), Kif11(-0.16), Aurka(-0.18), Aurka(-0.18), Polb(-0.19), Cdc16(-0.19), Haus2(-0.2), Tubg1(-0.25), Neil2…
CoA hydrolase activity	0.108369	0.315284	0.08021	0.294076	12	0.754105	0.457783	0.386141	0.0384972	0.048223	Acot10(0.2), Acot11(0.07), Lypla1(0.03), Ppt2(0), Acot9(-0.02), Lyplal1(-0.09), Lypla2(-0.12), Acot13(-0.13), Haghl(-0.16), Park7(-0.2), Ovca2(-0.24), Acot6(-0.36),
2-oxoglutaryl-CoA thioesterase activity	0.108369	0.315284	0.08021	0.294076	12	0.754105	0.457783	0.386141	0.0384972	0.048223	Acot10(0.2), Acot11(0.07), Lypla1(0.03), Ppt2(0), Acot9(-0.02), Lyplal1(-0.09), Lypla2(-0.12), Acot13(-0.13), Haghl(-0.16), Park7(-0.2), Ovca2(-0.24), Acot6(-0.36),
2,4,4-trimethyl-3-oxopentanoyl-CoA thioesterase activity	0.108369	0.315284	0.08021	0.294076	12	0.754105	0.457783	0.386141	0.0384972	0.048223	Acot10(0.2), Acot11(0.07), Lypla1(0.03), Ppt2(0), Acot9(-0.02), Lyplal1(-0.09), Lypla2(-0.12), Acot13(-0.13), Haghl(-0.16), Park7(-0.2), Ovca2(-0.24), Acot6(-0.36),
3-isopropylbut-3-enoyl-CoA thioesterase activity	0.108369	0.315284	0.08021	0.294076	12	0.754105	0.457783	0.386141	0.0384972	0.048223	Acot10(0.2), Acot11(0.07), Lypla1(0.03), Ppt2(0), Acot9(-0.02), Lyplal1(-0.09), Lypla2(-0.12), Acot13(-0.13), Haghl(-0.16), Park7(-0.2), Ovca2(-0.24), Acot6(-0.36),
glutaryl-CoA hydrolase activity	0.108369	0.315284	0.08021	0.294076	12	0.754105	0.457783	0.386141	0.0384972	0.048223	Acot10(0.2), Acot11(0.07), Lypla1(0.03), Ppt2(0), Acot9(-0.02), Lyplal1(-0.09), Lypla2(-0.12), Acot13(-0.13), Haghl(-0.16), Park7(-0.2), Ovca2(-0.24), Acot6(-0.36),
BAF-type complex	0.184123	0.240335	0.0816415	0.299014	17	0.200514	0.503925	0.279316	0.0484337	0.483139	Smarca2(0.37), Arid1a(0.31), Pbrm1(0.16), Pbrm1(0.16), Arid2(0.12), Smarcc2(0.06), Arid1b(0.06), Smarca4(-0.04), Smarcd1(-0.04), Smarcd3(-0.05), Smarce1(-0.08), Dpf2(-0.09), Smarcd2(-0.1), Brd7(-0.11), Smarcc1(-0.15), Actl6a(-0.18), Smarcb1(-0.21),
mitotic spindle assembly checkpoint	0.185069	0.208063	0.0822548	0.300941	19	0.564994	0.278557	0.0227854	0.414833	0.319067	Bub1b(0.69), Apc(0.35), Tpr(0.22), Tpr(0.22), Cep192(0.13), Zfp207(-0.01), Zfp207(-0.01), Zw10(-0.02), Mad2l1bp(-0.04), Cenpe(-0.06), Plk1(-0.07), Atm(-0.13), Bub3(-0.14), Klhl22(-0.21), Klhl22(-0.21), Mad1l1(-0.22), Psmg2(-0.48), Mad2l1(-0.5), Mad2l1(-0.5),
regulation of mitotic nuclear division	0.222485	0.224434	0.0823377	0.300941	14	0.214361	0.170007	0.0908589	0.429796	0.559949	Cul7(0.25), Fbxo5(0.18), Cdk11b(0.05), Kif20b(0.04), Cul9(0.03), Map9(-0.05), Cdc42(-0.06), Cenpe(-0.06), Ccdc8(-0.07), Fbxw5(-0.1), Ywhah(-0.18), Tubg1(-0.25), Bora(-0.39), Rcc1(-0.48),
methyl-CpG binding	0.230823	0.209066	0.0833967	0.304497	19	0.262935	0.209364	0.253852	0.261868	0.363704	Mecp2(0.24), Mecp2(0.24), Zbtb4(0.21), Zbtb21(0.17), Dnmt1(0.16), Dnmt1(0.16), Mbd1(0.12), Mbd1(0.12), Mbd2(0.04), Mbd2(0.04), Zbtb33(0.01), Uhrf1(-0.07), Zbtb38(-0.14), Mbd3(-0.21), Mbd3(-0.21), Lrwd1(-0.27), Erh(-0.46), Wdr77(-0.47), Prmt5(-0.5),
endoplasmic reticulum calcium ion homeostasis	0.218453	0.234443	0.08485	0.309484	17	0.437231	0.332048	0.155054	0.112024	0.402295	Pml(0.32), Bcl2(0.24), Herpud1(0.17), Camk2d(0.15), Atp2a2(0.14), Itpr1(0.04), Wfs1(-0.01), Psen1(-0.02), Psen1(-0.02), Psen1(-0.02), Selk(-0.04), Tmbim6(-0.1), Psen2(-0.15), Grina(-0.15), Tmco1(-0.16), Tmco1(-0.16), Kctd17(-0.28),
lipid homeostasis	0.133834	0.217275	0.0865559	0.315381	32	0.768416	0.519059	0.361646	0.021613	0.0732527	G6pc(0.58), Nr1d2(0.44), Acox3(0.19), Col4a3bp(0.18), Acaca(0.18), Acad10(0.15), Apoe(0.11), Acadsb(0.1), Usf1(0.07), Ivd(0.06), Adrb1(0.04), Pnpla2(0.02), Nr1h2(-0.01), Pkp2(-0.02), Acadl(-0.05), Gcdh(-0.06), Acadvl(-0.08), Cebpa(-0.08), Etfa(-0.08), Acad11(-0.09), Hnf4a(-0.1), Acadm(-0.13), Usf2(-0.16), Acad8(-0.18), Acad9(-0.19), Acox1(-0.2), Acox2(-0.21), Acads(-0.24), Apoa4(-0.26), Angptl3(-…
sodium channel activity	0.142088	0.249939	0.0874056	0.318149	15	0.0220944	0.428836	0.590677	0.380336	0.221485	Trpm2(0.39), Scnn1a(0.27), Scnn1b(0.16), Asic2(0.14), Scn1b(0.03), Scn2b(0.02), Asic1(-0.02), Scn7a(-0.02), Scn5a(-0.05), Kcnk1(-0.12), Slc4a11(-0.17), Hcn3(-0.22), Scn4b(-0.25), Scnn1g(-0.37), Hcn2(-0.54),
DNA polymerase binding	0.185525	0.287473	0.0880651	0.32022	11	0.48465	0.4064	0.103397	0.132531	0.354709	Ncoa2(0.22), Smg6(0.12), Cdk2ap1(-0.04), Smarca4(-0.04), Smarca4(-0.04), Smg5(-0.06), Rtel1(-0.1), Pcna(-0.11), Lonp1(-0.16), Acd(-0.16), Rad51(-0.21),
chylomicron	0.123115	0.329015	0.0881756	0.320293	13	0.533656	0.745987	0.428632	0.262515	0.00156719	Apob(0.76), Apobr(0.27), Lpl(0.2), Apoe(0.11), Apoe(0.11), Apoh(0.09), Apoa2(-0.01), Apoa2(-0.01), Apoa4(-0.26), Apoa4(-0.26), Lsr(-0.26), Apoa1(-0.5), Apoc3(-0.59),
sterol O-acyltransferase activity	0.185685	0.171616	0.0889173	0.322656	30	0.532472	0.365581	0.0959139	0.145828	0.34782	Mboat1(0.56), Soat2(0.39), Soat2(0.39), Nat14(0.33), Nat8f1(0.31), Lpgat1(0.28), Porcn(0.18), Mboat2(0.17), Hhat(0.05), Nat8(0.04), Esco1(0.02), Mboat7(0.01), Pla2g15(0.01), Soat1(0), Soat1(0), Ykt6(-0.01), Lpcat3(-0.03), Nat6(-0.06), Lclat1(-0.09), Naa40(-0.1), Nat10(-0.18), Naa50(-0.22), Nat8f2(-0.25), Nat9(-0.28), Naa10(-0.44), Acnat2(-0.46), Nat8f5(-0.49), Acnat1(-0.5), Lipt1(-0.5), Ciita(-0.…
receptor catabolic process	0.248633	0.281937	0.0891003	0.322989	12	0.187246	0.238154	0.273048	0.277228	0.41473	Tgfb1(0.28), Smurf1(0.27), Snx25(0.03), Snx25(0.03), Pik3r4(0.02), Sh3glb1(0.01), Kif16b(0), Becn1(-0.02), Uvrag(-0.06), Cdk5(-0.09), Capn1(-0.21), Lgmn(-0.26),
sperm flagellum	0.186907	0.206662	0.0897005	0.324831	18	0.125905	0.21793	0.473031	0.221673	0.40409	Rnf38(0.33), Catsper2(0.25), Hsp90aa1(0.24), Dnajb13(0.18), Iqcg(0.11), Met(0.1), Rsph1(0.07), Atp2b4(0.06), Abhd2(0.02), Rpgr(0.01), Als2cr12(-0.09), Gas8(-0.17), Slirp(-0.19), Nme5(-0.22), Ak1(-0.23), Ak2(-0.25), Sept4(-0.39), Ran(-0.46),
mitotic spindle organization	0.154573	0.204349	0.0900703	0.325837	27	0.600452	0.17099	0.0773427	0.270829	0.394417	Plk2(0.7), Eml1(0.48), Pcnt(0.41), Stil(0.39), Clasp2(0.25), Sbds(0.16), Clasp1(0.14), Map4(0.07), Map4(0.07), Kif2a(0.06), Ralbp1(0.04), Asun(0.02), Wdr62(0.02), Wdr62(0.02), Dctn6(-0.05), Dctn2(-0.17), Dctn2(-0.17), Aurka(-0.18), Syne4(-0.22), Cep126(-0.22), Gpsm2(-0.25), Tubg1(-0.25), Stmn1(-0.37), Spc25(-0.48), Rcc1(-0.48), Poc1a(-0.51), Aurkb(-0.6),
cholesterol biosynthetic process	0.182845	0.187799	0.0909843	0.328472	30	0.412192	0.731549	0.151361	0.047323	0.248848	Pmvk(0.38), Pmvk(0.38), Mvd(0.17), Insig1(0.16), Hmgcr(0.15), Hmgcr(0.15), Fdft1(0.14), Apoe(0.11), Cyp51(0.07), Hmgcs1(0.05), Insig2(0.02), Prkaa1(0.02), Nsdhl(0.01), Tm7sf2(-0.05), Cyb5r3(-0.05), Lss(-0.08), Prkaa2(-0.11), Ebp(-0.12), Mvk(-0.14), Dhcr7(-0.15), Dhcr7(-0.15), Hsd17b7(-0.15), Fdps(-0.16), Cftr(-0.19), G6pdx(-0.22), Apoa4(-0.26), Dhcr24(-0.27), Dhcr24(-0.27), Apoa1(-0.5), Hmgcs2(-0…
mitochondrial crista	0.190836	0.277451	0.0912442	0.328947	11	0.703517	0.378886	0.040062	0.0994245	0.431599	Star(0.28), Lyn(0.11), Slc8b1(0.04), Slc8b1(0.04), Bdnf(-0.01), Fdx1(-0.07), Opa1(-0.07), Cox6b2(-0.1), Hspd1(-0.14), Akap1(-0.46), Phb(-0.48),
MHC class II protein complex binding	0.154621	0.324751	0.0913019	0.328947	11	0.309917	0.287723	0.496762	0.192527	0.147477	Pkm(0.25), Hspa8(0.24), Hsp90aa1(0.24), Anxa11(0.1), Hsp90ab1(0.05), H2-DMa(-0.08), Cd74(-0.09), Atp1b1(-0.12), Ywhae(-0.13), Cd81(-0.18), H2-DMb1(-0.28),
juxtaparanode region of axon	0.175708	0.343546	0.0920269	0.331222	11	0.0151425	0.441648	0.53718	0.502414	0.224648	Kcnab1(0.53), Kcnab2(0.37), Kcnab2(0.37), Epb41l3(0.2), Dlg4(0.1), Dlg4(0.1), Sirt2(-0.08), Dlg2(-0.22), Dlg2(-0.22), Kcna1(-0.75), Kcna1(-0.75),
intrinsic apoptotic signaling pathway	0.199997	0.178446	0.0931438	0.334561	25	0.198725	0.1894	0.347484	0.64246	0.1147	Casp4(0.43), Eaf2(0.42), Trp53bp2(0.29), Ddx3x(0.26), Ppp1r13b(0.25), Msh6(0.11), Plscr1(0.11), Ppm1f(0.1), Nol3(-0.01), Casp12(-0.03), Sgpp1(-0.03), Nbn(-0.07), Bnip3(-0.09), Bnip3(-0.09), Prkca(-0.09), Bad(-0.16), Diablo(-0.16), Hras(-0.17), Hras(-0.17), Mllt11(-0.18), Apopt1(-0.2), Bbc3(-0.2), Lgals12(-0.21), Bax(-0.34), Htra2(-0.35),
Arp2/3 complex-mediated actin nucleation	0.214373	0.240332	0.0936904	0.336183	16	0.319495	0.167772	0.158197	0.33765	0.462134	Iqgap2(0.19), Arpc1b(0.15), Arpc1b(0.15), Jmy(0.06), Actr3(0.06), Arpc3(0.03), Actr3b(0.03), Actr2(0.01), Arpc2(0.01), Arpc1a(-0.08), Wash1(-0.1), Wash1(-0.1), Arpc5(-0.13), Arpc4(-0.15), Arpc5l(-0.23), Trim27(-0.24),
histone H3 acetylation	0.230008	0.138367	0.0940489	0.337128	45	0.16512	0.415111	0.256058	0.182895	0.42262	Per1(0.45), Per1(0.45), Ep300(0.33), Kat6a(0.31), Kat6a(0.31), Brd1(0.28), Brpf1(0.27), Trim16(0.27), Spi1(0.24), Sap130(0.23), Sap130(0.23), Jade1(0.22), Jade2(0.16), Kat2b(0.12), Ing5(0.11), Brpf3(0.11), Taf9b(0.11), Taf5l(0.03), Brca2(0.02), Tada1(0.02), Mbip(0.02), Kat7(-0.01), Jade3(-0.01), Supt7l(-0.03), Tada3(-0.03), Tada3(-0.03), Smarca4(-0.04), Tcf3(-0.05), Ing4(-0.05), Dr1(-0.14), Pole4…
reciprocal meiotic recombination	0.238466	0.214894	0.0945366	0.33819	15	0.221823	0.244602	0.263046	0.342863	0.329819	Sycp1(1.01), Xrcc3(0.41), Msh6(0.11), Cep63(0.04), Xrcc2(-0.01), Rad50(-0.02), Msh3(-0.05), Topbp1(-0.07), Rad51d(-0.08), Rad51c(-0.09), Msh2(-0.14), Mlh1(-0.18), Rad51(-0.21), Trip13(-0.43), Chtf18(-0.53),
peptidase activity	0.211784	0.0513996	0.095011	0.339505	347	0.347906	0.275819	0.336172	0.300998	0.158741	Mmp8(1.13), Adamts4(0.97), Prss27(0.94), Prss22(0.92), Mmp25(0.83), Fgl2(0.77), Papln(0.74), Adam8(0.71), Mmp3(0.65), F10(0.62), Htra4(0.6), Mmp9(0.59), Mmp9(0.59), Asprv1(0.59), Pgpep1l(0.58), Adamts1(0.57), Mmp19(0.57), Thsd4(0.57), Tnfaip3(0.54), Rhbdl1(0.54), Corin(0.53), Plat(0.51), Tll1(0.5), Cndp1(0.48), Zc3h12a(0.46), Mmp14(0.45), Reln(0.45), Casp4(0.43), Mmp7(0.43), Mmp7(0.43), St14(0.41…
oxidoreductase activity, acting on a sulfur group of donors, disulfide as acceptor	0.222337	0.28234	0.095096	0.339505	10	0.378317	0.537462	0.222735	0.149158	0.181313	Ero1lb(0.39), Msrb3(0.29), Dnajc10(0.05), Ero1l(-0.02), Msrb1(-0.09), Msrb2(-0.14), Txnl1(-0.22), Msra(-0.25), Txn1(-0.28), Txn2(-0.31),
N-acyltransferase activity	0.178415	0.181127	0.0952143	0.339585	28	0.458901	0.615202	0.107314	0.0874301	0.301629	Mboat1(0.56), Baat(0.54), Baat(0.54), Nat14(0.33), Nat8f1(0.31), Lpgat1(0.28), Porcn(0.18), Mboat2(0.17), Hhat(0.05), Nat8(0.04), Esco1(0.02), Mboat7(0.01), Pla2g15(0.01), Ykt6(-0.01), Lpcat3(-0.03), Nat6(-0.06), Lclat1(-0.09), Naa40(-0.1), Nat10(-0.18), Naa50(-0.22), Nat8f2(-0.25), Nat9(-0.28), Naa10(-0.44), Acnat2(-0.46), Nat8f5(-0.49), Acnat1(-0.5), Lipt1(-0.5), Ciita(-0.55),
positive regulation of glycolytic process	0.180622	0.281347	0.0969042	0.344916	11	0.160726	0.628539	0.503918	0.0630929	0.234979	Insr(0.32), P2rx7(0.32), Igf1(0.12), Mlxipl(0.03), Mlxipl(0.03), Prkaa1(0.02), Prkaa2(-0.11), Entpd5(-0.24), Gpd1(-0.24), Mif(-0.24), Myc(-1.62),
phospholipid dephosphorylation	0.206989	0.273696	0.0971649	0.345112	11	0.0655339	0.285768	0.33098	0.229651	0.637116	Plpp3(0.36), Plpp1(0.25), Plppr3(0.21), Plpp5(-0.02), Plpp5(-0.02), Plppr4(-0.07), Plppr4(-0.07), Ephx2(-0.19), Plppr2(-0.21), Plpp2(-0.26), Plppr1(-0.76),
spindle midzone	0.16172	0.248962	0.0972519	0.345112	17	0.168215	0.533482	0.0683106	0.39764	0.391336	Gem(0.37), Ctdp1(0.2), Pkp4(0.16), Camk2b(0.12), App(0.06), Kif20b(0.04), Racgap1(0), Arl8a(-0.05), Plk1(-0.07), Unc119(-0.09), Arl8b(-0.1), Cdc6(-0.17), Aurka(-0.18), Cdca8(-0.22), Cenpv(-0.51), Cenpv(-0.51), Aurkb(-0.6),
protein peptidyl-prolyl isomerization	0.253358	0.186672	0.0973494	0.345112	20	0.45922	0.211134	0.22633	0.213348	0.326715	Nktr(0.36), Ranbp2(0.23), Fkbp5(0.15), Ppil6(0.15), Ppig(0.1), Ppil4(0.09), Fkbp1b(0.05), Cwc27(0.03), Ppib(0), Ppil2(-0.03), Ppid(-0.08), Ppic(-0.15), Ppwd1(-0.15), Ppia(-0.15), Ppie(-0.19), Fkbp1a(-0.22), Ppil3(-0.23), Fkbp4(-0.29), Ppil1(-0.33), Ppif(-0.52),
response to interferon-gamma	0.131739	0.303243	0.0983804	0.34807	15	0.0150386	0.14769	0.40034	0.245074	0.898244	Mefv(0.9), Cyp27b1(0.69), Slc11a1(0.31), Ifitm2(0.15), Gch1(0.13), Cxcl16(0.09), Snca(-0.02), Kynu(-0.03), Trim21(-0.12), Ifitm3(-0.12), A230050P20Rik(-0.2), Ccl5(-0.34), Bst2(-0.42), Ciita(-0.55), Ciita(-0.55),
regulation of cysteine-type endopeptidase activity involved in apoptotic process	0.178547	0.275802	0.0985711	0.348396	13	0.158167	0.560484	0.384416	0.361967	0.0827199	Nlrp12(1.12), Cdh1(0.38), Nradd(0.3), Trp63(0.27), Fas(0.19), 0610009O20Rik(-0.06), Nlrc4(-0.06), Epha7(-0.07), Bad(-0.16), Pycard(-0.18), Anp32b(-0.32), Bax(-0.34), Mgmt(-0.46),
regulation of potassium ion transmembrane transport	0.228012	0.328377	0.0992373	0.350401	10	0.146126	0.595504	0.33203	0.321832	0.121601	Kcnab1(0.53), Kcnab2(0.37), Kcnh2(0.35), Kcnip4(0.3), Kcnip4(0.3), Cacna1d(0.09), Prnp(-0.1), Kcnip3(-0.44), Kcnip2(-1.07), Kcnip2(-1.07),
negative regulation of phagocytosis	0.252215	0.234695	0.100013	0.352435	12	0.213797	0.117053	0.268252	0.55457	0.344055	Tgfb1(0.28), Syt11(0.15), Cnn2(0.14), Fcgr2b(0.14), Pten(0.02), Atg3(-0.09), Snx3(-0.13), Atg7(-0.18), Csk(-0.24), Atg5(-0.3), Rack1(-0.42), Adipoq(-1.32),
regulation of fibroblast migration	0.252906	0.276067	0.10038	0.353181	11	0.36155	0.386859	0.233001	0.18817	0.272487	Sdc4(0.18), Fer(0.07), Mta2(0.07), Gna12(0.06), Rac1(0.06), Wdpcp(0.05), Prr5l(-0.05), Prr5l(-0.05), Coro1c(-0.08), Rffl(-0.09), Rcc2(-0.48),
vacuole	0.205689	0.218861	0.101067	0.354386	20	0.362741	0.620754	0.162053	0.096524	0.301273	Cit(0.6), Mst1r(0.47), Ctsl(0.13), Ttc3(0.06), Man2c1(0.04), Vmp1(0.04), Slc11a2(0.03), Atp6v0c(0.02), Glb1l(-0.01), Slc22a17(-0.03), Cd74(-0.09), Atp6ap1(-0.09), Tmem138(-0.13), Slc30a2(-0.14), Lamp1(-0.15), Nprl3(-0.16), Atp6v0b(-0.17), Glb1l2(-0.19), Glb1(-0.21), Nprl2(-0.22),
[truncated: 225 more rows]
